# Supplementary material for: QSAR Models for Active Substances Against <em>Pseudomonas aeruginosa</em> Using Disk-diffusion Test Data
Source: Preprints.org preprint supplement (doi:10.20944/preprints202102.0147.v1), 2021-02-04
Supplement: Supplementary file 1 [file supplementary]

Archive with 6 entries (5 files):
- Supplementary materials/
- Supplementary materials/Table S1. Training_data_set.xlsx
- Supplementary materials/Table S2. External_validation_dataset.xlsx
- Supplementary materials/Table S3. Mean_results_nested_cross_validation_5_runs.xlsx
- Supplementary materials/Table S4. External_validation_results.xlsx
- Supplementary materials/Table S5. Top_25_descriptors_by_each_selection_method.xlsx
