# Supplementary material for: QSAR Models for Active Substances Against <em>Pseudomonas aeruginosa</em> Using Disk-diffusion Test Data
Source: Preprints.org preprint supplement (doi:10.20944/preprints202102.0147.v1), 2021-02-04
Supplement: Supplementary file 1 [file supplementary › Supplementary materials/Table S1. Training_data_set.xlsx]

## Sheet: SetAntrenamentFinal
	SMILES	IZ	ABC	VR1_A	VR3_A	nAromAtom	nHetero	nN	nO	nX	ATS0s	ATS0Z	AATS0dv	AATS7dv	AATS8dv	AATS0s	AATS6s	AATS7s	AATS8s	AATS0Z	AATS1Z	AATS3Z	AATS4Z	AATS7Z	AATS8Z	AATS0v	AATS3v	AATS5v	AATS6v	AATS7v	AATS0i	AATS1i	AATS2i	AATS3i	AATS4i	AATS5i	AATS6i	AATS7i	AATS8i	ATSC1dv	ATSC2dv	ATSC3dv	ATSC4dv	ATSC5dv	ATSC6dv	ATSC7dv	ATSC8dv	ATSC1d	ATSC2d
2800	Cc1ccc(C)c(NS(=O)(=O)c2ccc(NC(=O)c3cn(CCO)c4c(cc(O)c5ncccc54)c3=O)cc2)c1	11	31.5519	2759.99	9.30928	26	11	4	6	0	416.216	1906	9.12795	4.41118	4.4662	6.30631	4.14194	4.35082	4.10815	28.8788	30.8857	23.8758	21.8046	17.8263	17.1608	241.796	230.26	202.145	193.747	175.923	159.847	145.095	150.612	153.053	158.089	156.719	157.98	161.374	160.401	41.4198	63.5185	15.1111	25.8889	-25.8395	-107.111	-108.272	24.0988	17.3884	2.70248
343	Cc1cc(SCc2nnc(-c3ccc(Br)cc3)n2N)nc(SCc2nnc(-c3ccc(Br)cc3)n2N)n1	25	29.2957	306.758	7.03439	28	14	10	0	2	192.163	4300	8.50918	3.99623	4.1837	3.37129	2.98019	2.40814	2.71664	75.4386	37.9016	34.2348	30.024	32.5593	30.1	270.107	243.62	207.825	213.895	197.85	161.769	150.675	153.257	156.727	162.865	162.281	160.187	162.378	160.923	78.21	36.5467	-113.664	-155.979	32.9364	33.5205	73.5772	-51.5531	12.1773	-4.55125
699	Cc1cc(C)c2c(n1)nn1c(N)c(C(=O)Nc3ccc4c(c3)C(=O)c3ccccc3C4=O)nnc21	21	28.4149	457.476	7.37849	25	10	7	3	0	307.917	1452	11	6.73913	6.89011	5.92147	3.63675	4.218	4.15446	27.9231	29.2456	26.3419	23.6846	20.9239	20.1868	259.014	255.682	203.31	200.771	206.606	160.548	147.817	150.328	154.565	158.784	164.7	161.585	161.079	164.462	86.0473	87.9053	25.9231	-45.5385	-196.331	-54	-19.1598	83	18.3214	5.28033
3822	O=C(Nc1ccc(S(=O)(=O)Nc2cccc([N+](=O)[O-])c2)cc1)c1cn(CCO)c2c(cc(O)c3ncccc32)c1=O	7	32.259	4240.5	9.76342	26	14	5	8	0	520.216	2006	11.2007	6.39374	5.63307	8.39058	4.31371	5.95621	4.74909	32.3548	33.5455	25.4276	24.0823	21.2081	19.7054	252.132	233.573	214.247	200.54	188.294	160.546	146.923	150.11	154.995	158.493	156.591	158.651	161.305	161.678	14.0334	43.1961	21.5204	-31.6067	-119.774	-125.872	-4.11643	26.8778	10.8855	0.151405
3518	CCOC(=O)c1cn(Cc2ccc(C#N)cc2)c2cc(C(F)(F)F)ccc2c1=O	8	22.352	370.318	6.97907	16	8	2	3	3	427.785	1304	12.4091	6.89524	6.41111	9.72238	4.48806	5.95529	4.58287	29.6364	28.9565	23.4845	21.7944	21.0571	20.5778	250.615	232.738	214.071	216.586	197.321	166.499	145.419	156.838	154.019	163.345	160.504	157.338	167.008	158.38	61.9752	90.4318	5.95661	-74.4855	-48.4318	-89.1033	-78.9607	25.5207	7.375	1.0625
4504	COC(=O)c1c(C)nc(C)c2c1C(=O)C(Cl)=C(N)C2=O	0	15.2106	111.448	5.40671	6	7	2	4	1	236.839	1122	11.0195	0.906746	0.12	7.63996	4.53642	3.5226	3.48148	36.1935	30.25	34.8644	29.8592	12.2321	9.44	248.51	285.24	206.711	160.001	114.801	161.77	146.832	154.051	151.621	153.761	157.762	165.758	171.722	170.65	71.9753	73.3333	-19.8395	-59.3704	-101.062	-84.2346	-50.8025	-36.6543	16.6972	9.91883
1457	CCCc1nnc2sc3cc4ccccc4c-3nn12	16.3	15.3541	137.684	5.56682	16	5	4	0	0	88.5868	968	8.07885	2.94737	1.19444	2.85764	2.53914	2.47661	2.2037	31.2258	30.5882	24.7971	21.9206	17	11.5556	253.944	218.539	215.079	210.911	200.227	159.562	145.879	150.44	157.726	160.99	162.02	157.235	152.408	157.506	57.8466	68.3826	39.9407	-34.2435	-71.3715	-74.4558	-66.8371	-59.0132	10.2414	9.75338
3380	O=C(c1cccnc1Nc1nc2c(Cl)cccc2s1)N1CCN(CCO)CC1	9	21.9369	363.153	6.92444	15	9	5	2	1	196.425	1622	7.6677	4.24653	3.94764	4.0922	2.83674	2.7342	3.0967	33.7917	29.8235	22.0702	22.0085	19.9688	21.8851	237.887	200.34	171.382	185.071	189.508	162.709	148.315	157.405	160.721	161.076	164.482	164.003	162.05	157.501	41.2886	-0.673525	20.5601	17.0504	6.10273	-17.8409	-8.8071	-34.6339	9.21354	1.15278
2774	O=[N+]([O-])c1ccc(-c2csc(N3N=C(c4ccccc4)CC3c3ccc(-c4ccc(Cl)cc4)o3)n2)cc1	11	29.7436	543.73	7.60679	28	9	4	3	1	267.064	1960	9.46517	6.13371	5.03101	4.76901	2.70043	3.21167	2.83715	35	31.5574	23.622	23.8295	25.5085	22.6822	270.933	228.38	215.64	229.208	240.978	156.08	143.191	145.804	154.282	155.593	156.21	153.733	153.763	152.623	49.0262	5.46939	-54.3993	-61.2774	-5.49685	26.0632	-6.84404	-58.4591	7.46843	-6.88138
1723	Cc1cc(Sc2nc3ccccc3s2)nc(SCc2nc3ccccc3s2)n1	16	22.6559	201.652	6.33616	24	8	4	0	0	118.93	1954	7.89947	5.08857	4.46465	2.83168	2.45405	2.5225	2.66367	46.5238	38.3478	33.378	33.5325	29.8696	26.7576	292.045	257.222	253.22	259.753	238.703	152.357	139.455	144.332	149.934	151.742	148.648	146.689	153.604	152.647	34.9753	-7.34568	-48.6173	-62.0123	11.1605	52.5926	34.4444	-78.2963	6.22449	3.36735
1466	NC(=O)c1cc(-c2csc(-c3cc(Cl)cc(Cl)c3Cl)n2)ccc1O	16	18.7985	150.356	5.88847	17	8	2	2	3	176.63	1934	9.4321	4.93687	4.78042	5.35244	3.66938	3.18738	2.56619	58.6061	38.6857	38.7761	40.8382	33.3636	30.2381	305.58	282.387	243.947	247.159	246.565	154.49	142.77	142.681	148.866	153.899	155.425	154.021	153.544	150.874	13.1377	-6.51331	-44.1949	-22.9846	-0.322212	9.67585	-37.3232	32.5256	5.62167	-4.88154
244	COc1ccc(NC(=O)Nc2ccc(-c3nc(Oc4cccc(C)c4)c4ccccc4n3)cc2)cc1	26	28.3817	1451.12	8.56102	28	7	4	3	0	230.556	1456	8.53333	4.98374	3.99254	3.84259	3.11629	3.02055	2.87583	24.2667	26.4688	20.5156	18.5299	18.9187	16.2463	244.174	219.587	201.992	221.093	220.741	158.606	144.741	150.071	154.252	159.098	159.865	154.427	152.576	153.945	71.7778	24.3611	-27.4444	3.38889	-44	-70.7222	-77.0833	-16.7778	11.5511	-1.94222
709	Fc1ccccc1-c1cccc(-c2n[nH]c(=S)o2)c1	21	14.9467	102.142	5.26822	17	5	2	1	1	150.847	1012	10.5159	6.07207	5.44872	5.38739	3.20396	4.10794	3.82882	36.1429	31.2667	24.1053	22.0926	23.2432	24.9231	274.494	235.887	219.127	200.029	189.784	159.221	145.194	147.532	152.021	157.686	158.585	158.292	164.799	167.047	22.1678	-1.04082	-14.4082	-44.2948	-40.907	13.6304	21.1995	-3.15193	3.20663	-2.25128
2275	O=C1N/C(=N\c2ccccc2[N+](=O)[O-])S/C1=C\c1ccccc1[N+](=O)[O-]	13	20.1437	178.659	6.14099	12	10	4	5	0	361.67	1358	13.1235	9.78571	8.40476	10.0464	4.81269	7.18783	7.25794	37.7222	34.6579	27.6027	28.0694	26.0179	23	270.53	238.275	235.243	241.573	212.265	159.929	148.368	147.43	154.48	160.039	158.509	157.168	162.375	163.007	22.1715	23.7157	20.8419	-33.9136	-64.9873	-49.6375	8.62209	-7.19547	3.05556	-1.69444
2916	c1ccc(-c2nnc(NC34CC5CC(CC(C5)C3)C4)s2)cc1	10	18.3443	352.995	6.65491	11	4	3	0	0	94.3993	1072	5.26615	3.11538	2.29091	2.19533	2.13483	2.30235	2.16364	24.9302	25.9574	14.4296	12.1849	18.0385	14.6727	223.321	169.654	162.085	169.405	206.587	160.619	144.008	147.909	156.671	165.882	164.722	165.384	156.928	152.286	37.0076	-7.59191	13.1251	65.2712	9.28069	-25.5169	-64.9455	-82.8817	4.71444	-6.95998
2291	Cc1nn(C(=O)c2[nH]nc(-c3ccc(Cl)cc3)c2N)c(C)c1Cl	13	18.0105	159.454	5.90467	16	8	5	1	2	158.872	1440	8.86694	3.25627	3.18083	4.4131	3.11258	3.13169	2.76237	40	31.2368	30.662	23.3038	24.3065	18.4706	255.493	244.771	205.566	180.737	184.059	163.439	151.292	154.047	158.676	164.947	162.797	165.913	167.151	166.695	62.4461	51.6459	-31.9809	-49.276	-57.036	-24.702	-64.2512	-16.2048	13.125	-0.875
185	Fc1ccc(-c2csc3nc(-c4cc(F)c(Cl)cc4Cl)nn23)cc1	28	19.2868	193.916	6.14289	20	8	3	0	4	214.042	1726	12.3114	7.84568	7.52413	6.90457	3.68966	4.10094	4.17371	55.6774	39.5588	36.8281	37.661	42.9722	39.0606	312.342	274.171	259.906	274.921	290.677	161.536	144.736	148.557	157.2	162.379	161.475	157.51	155.171	151.747	22.941	-2.16374	-53.0799	-37.0418	13.466	1.28436	-45.7598	15.9543	2.64828	-4.13736
90	Fc1cc(-c2nc3scc(-c4ccc(Cl)cc4)n3n2)c(Cl)cc1Cl	31	19.2868	193.916	6.14289	20	8	3	0	4	151.853	1934	10.7503	6.1749	5.82716	4.89847	3.09817	2.93369	3.23269	62.3871	40.9706	38.5781	38.7458	49.6389	42.2121	322.888	281.644	263.456	282.272	307.486	157.168	143.261	146.699	153.739	159.475	160.529	154.956	149.014	148.265	21.7756	3.70956	-19.4005	-10.4968	5.65534	-13.8334	-36.0383	-8.26192	2.64828	-4.13736
670	CC(C)C1/C(=N/OC(=O)Oc2ccccc2)CC(c2ccccc2)N(C)C1c1ccccc1	22	25.6103	1023.11	8.12453	18	5	2	3	0	211.75	1328	6.60317	2.79048	2.87647	3.36111	2.62474	2.58651	2.85131	21.0794	23.7576	16.6154	15.1459	12.919	14.0588	221.06	193.31	176.26	162.666	151.285	159.946	143.683	151.053	154.845	159.075	159.43	160.036	162.55	158.219	80.9713	47.845	27.7763	10.6785	-65.0693	-60.941	-1.24868	-94.4795	14.1497	1.06803
2812	Cc1ccc(-c2csc(Nc3cc(-c4ccc(C)cc4)n(-c4nc(-c5ccc(C)cc5)cs4)n3)n2)cc1	11	29.8245	567.069	7.64881	33	7	5	0	0	168.424	1862	7.20789	5.05314	4.4186	2.71651	2.6802	2.73607	2.47497	30.0323	29.403	22.1462	20.8776	26.5565	22.2093	256.334	230.069	204.963	240.159	239.04	156.413	142.89	147.81	150.975	156.533	158.655	153.217	155.269	153.108	82.6795	31.6264	-35.9316	45.1106	75.4774	-33.6872	-67.1994	-31.8689	15.4056	-2.62591
4333	Cc1ccc(NC(=S)NC(=O)c2cn(CCO)c3c(cc(Cl)c4ncccc43)c2=O)cc1	0	24.9722	1356.87	8.37609	20	9	4	3	1	257.047	1780	8.74607	5.01818	4.62271	5.04013	3.80469	4.39386	3.63165	34.902	29.5185	24.9397	25.2903	23.5636	23.033	255.974	234.593	218.822	203.324	191.128	158.951	146.088	150.889	154.011	157.051	154.719	159.414	161.586	160.214	48.8361	18.1323	27.4291	24.538	-25.0939	-58.0791	-20.8187	-25.2587	12.293	4.82199
1105	Cc1cc(C)cc(-c2nn3c(=O)c4c5c(sc4nc3s2)CCCC5)c1	18	20.5512	255.81	6.46073	18	6	3	1	0	145.618	1424	7.54497	3.89617	3.34667	3.46709	2.85604	2.90741	2.91543	33.9048	31.3261	24.89	25.2286	23.0328	22.5	255.122	229.712	216.546	188.045	219.018	156.822	142.063	148.457	150.336	155.18	155.269	165.126	156.606	150.323	73.4817	68.0343	87.2232	50.2804	-68.8282	-61.2978	-130.669	-97.0154	13.6122	10.051
3725	O=C1NC(=S)/C(=C/c2c(Cl)cccc2Cl)S1	7	12.3371	71.3176	4.73715	6	6	1	1	2	98.6389	1568	8.86185	3.75439	2	4.69709	3.13113	4.08934	4.16255	74.6667	44.5	44.25	47.4242	35.1579	11.2222	335.799	289.139	299.755	317.691	206.301	149.533	139.725	140.901	145.162	149.332	148.156	147.263	158.063	170.924	1.84659	-26.7745	0.767728	-6.50995	12.9937	3.0236	-9.08883	-9.27135	0.734694	-3.16327
3916	O=C1CC(c2ccccc2)N(Cc2ccccc2)C2CCCCC2N1	6	19.7466	213.567	6.28024	12	3	2	1	0	152.417	980	5.21569	1.88166	1.25874	2.98856	2.38136	2.26529	2.09557	19.2157	22.3519	14.3311	12.9398	11.3018	8.8951	212.325	174.222	165.446	163.221	151.51	160.888	144.2	151.158	158.744	161.107	159.359	157.98	158.886	161.681	33.6644	-18.4291	-18.4602	-6.3564	-3.79239	-48.7439	-40.692	-28.4498	7.12803	-2.83391
3545	Cc1ccc2[nH]c(-c3ccccc3)c(-c3cc(-c4ccc(Cl)cc4)nc4nc[nH]c(=O)c34)c2c1	8	27.5414	410.759	7.24178	31	6	4	1	1	196.422	1576	8.55858	5.32236	3.85609	3.70607	3.18233	3.15534	3.13769	29.7358	28.3793	23.0082	21.4769	20.8519	18.4518	266.843	247.918	246.561	250.239	226.599	155.891	142.828	145.97	149.282	153.18	151.01	149.874	152.268	156.824	52.2373	29.2378	24.7461	48.5685	10.1605	-33.9939	-103.277	-182.921	13.0498	3.98469
1751	C[C@]12CC[C@H](O)[C@@](C)(C(=O)O)[C@@H]1CCc1cc3[nH]c4ccccc4c3cc12	15	22.0965	216.448	6.3706	13	4	1	3	0	219.375	1094	6.46154	2.68376	2.76471	4.21875	2.49001	2.46688	2.52206	21.0385	23.5536	17.8077	14.1034	13.1026	12.9412	219.432	211.583	142.995	134.036	161.758	159.746	143.227	146.833	150.261	156.301	161.077	164.964	159.031	158.247	62.9822	45.0385	-70.2308	-112.478	-11.6716	-17.5592	-31.2885	-4.37574	21.2737	-2.71154
2119	O=C1N/C(=N\c2ccc([N+](=O)[O-])cc2)S/C1=C\c1ccc(Cl)cc1	14	18.7415	185.019	6.09593	12	8	3	3	1	247.703	1470	10.9426	6.39775	6.40936	7.28539	4.33023	4.03323	4.18784	43.2353	35.1389	27.4928	25.3594	29.7174	34.6842	281.381	236.096	236.224	235.963	222.064	157.16	145.124	145.91	153.436	158.013	155.027	154.896	158.752	159.359	15.4726	-6.73536	-16.2993	-25.4281	14.6627	-0.0442992	-28.8609	-29.1056	0.885813	-6.84429
1539	CC1CC(C)CN(c2nc(-c3ccc(NCC(=O)Nc4nc5ccccc5s4)cc3)nc(N3CC(C)CC(C)C3)n2)C1	16	33.6192	1189.47	8.51635	21	10	8	1	0	241.781	1904	6.12737	3.31522	2.20253	2.94855	2.60343	2.64362	2.20019	23.2195	24.9885	16.4537	13.9634	18.4239	14.2152	214.092	177.612	178.243	169.053	205.769	163.864	147.622	156.466	158.787	169.309	160.501	169.797	154.553	161.198	117.878	99.384	95.9144	72.9485	-12.3549	-164.762	-240.953	-224.328	15.718	-1.46163
3102	C=C(C)C(CC/C(C)=C/CO)N(O)c1ccccn1	10	13.7513	151.024	5.65929	6	4	2	2	0	160.861	788	5.36585	1.53846	1.24444	3.92344	2.36164	2.60256	2.55185	19.2195	21.3659	15.1364	12.5981	10.7582	8.26667	194.049	171.929	137.89	138.339	140.559	164.963	148.465	156.487	158.546	164.544	164.772	165.679	159.638	169.521	38.2439	-0.133254	-4.97977	-15.997	-39.4646	-45.163	-41.2136	32.5473	8.53659	-3.30399
3674	O=C1CC(c2ccc(Br)cc2)N(Cc2ccccc2)C2CCCCC2N1	8	20.5631	224.264	6.36834	12	4	2	1	1	151.328	2204	5.35426	2.00789	1.36312	2.96722	2.37076	2.23425	2.07764	43.2157	26.1296	17.5473	14.5783	15.3254	17.4545	225.508	181.625	167.952	168.162	160.544	159.998	143.828	150.752	158.145	160.694	159.242	157.582	158.242	160.399	33.7475	-20.4323	-20.6265	-5.57941	-1.51528	-47.5064	-33.1119	-27.058	6.49481	-4.4752
4379	O=C1Nc2ccc(Cl)cc2/C1=N/Nc1nc2ccccc2[nH]c1=O	0	19.2179	212.905	6.23632	16	8	5	2	1	199.561	1248	11.106	9.34343	7.23256	5.86944	4.5855	5.38522	4.06982	36.7059	32.0541	26.7027	24.25	28.1136	27.3488	271.777	232.759	208.494	225.624	241.22	160.975	149.727	150.615	159.888	164.139	165.252	164.101	161.418	156.57	21.4673	8.21261	11.8205	-19.9557	-23.8662	-2.67747	9.49071	-52.018	4.15917	-3.9481
2924	Cc1ccc(OCc2ccccc2-c2nn(CNc3ccc(Cl)cc3C(=O)C(F)(F)F)c(=S)o2)cc1	10	28.2277	463.504	7.41975	23	11	3	3	4	389.082	2046	11.0191	6.05051	6.34545	7.07421	3.97783	3.76824	3.74397	37.2	31.069	25.906	22.5276	25.4818	24.3364	257.991	229.608	198.87	220.838	219.003	164.719	146.855	156.757	155.417	159.097	165.928	164.527	160.449	162.018	65.2329	67.0383	35.2366	24.8725	3.03819	-152.66	-39.2696	99.2983	6.07669	-4.40033
2427	O=C1C[C@@]2(CO1)CO[C@@]1(CO)CC(=O)O[C@@H]21	12	12.8235	84.0302	4.90118	0	6	0	6	0	204.458	756	10.6429	5.5	0	7.30208	4.66304	10.6806	7	27	27.6667	19.443	14.6667	14.8333	8	210.947	184.589	144.25	96.1861	90.1601	164.274	146.359	154.084	156.731	168.745	163.737	177.449	182.468	185.184	29.3061	-28.4082	-83.6939	-2.97959	19.3878	0.612245	-1.59184	-8.4898	7.30612	-4.12245
3062	COc1ccc(C2=NN(c3nc(-c4ccc([N+](=O)[O-])cc4)cs3)C(c3ccc(SC)cc3)C2)cc1OC	10	28.9271	503.845	7.5306	23	10	4	4	0	278.924	1960	8.73588	5.22475	4.33179	4.57252	2.50096	2.99308	2.70098	32.1311	30.7231	24.5669	22.269	23.9924	22.7639	249.399	237.52	188.835	203.375	224.22	158.408	144.416	150.381	151.786	153.86	159.116	156.369	154.778	154.51	88.1871	40.9051	-61.0097	-96.7131	-14.0886	58.7263	13.7456	-43.4307	17.9965	1.21715
82	N#CC1c2ccccc2C(=N)C(C#N)(C#N)C1c1ccc(Cl)cc1	31	18.2781	189.295	6.11878	12	5	4	0	1	215.568	1180	9.303	3.45009	1.83007	6.15908	5.37311	3.97234	2.87896	33.7143	29.5405	24.2556	22.6436	21.7797	27.3529	281.885	259.814	224.271	203.041	192.091	155.894	140.33	140.373	147.963	152.765	156.001	161.538	164.213	163.866	16.7175	-12.2797	17.6456	19.7236	-4.72746	-68.7563	-71.1045	-4.7817	10.28	-1.96
3521	COc1ccc(NS(=O)(=O)c2ccc(NC(=O)c3cn(CCO)c4c(cc(O)c5ncccc54)c3=O)cc2)cc1	8	31.3736	4415.32	9.77913	26	12	4	7	0	423.688	1932	9.85069	5.52252	5.06468	6.62013	4.01909	4.72831	4.42657	30.1875	31.9706	24.6507	22.9563	20.3581	18.903	245.145	231.52	203.145	192.889	185.86	159.98	145.639	151.216	154.304	157.064	156.254	158.898	161.003	161.253	25.2101	30.7292	0.896701	-8.29167	-50.8932	-99.4306	-26.8316	45.6901	15	3
1650	FC(F)(F)c1cccc2c(N3CCC(N4CCOCC4)CC3)c(-c3nnc(S)n3-c3ccccc3)cnc12	16	30.5257	603.867	7.73835	21	11	6	1	3	351.367	1856	9.22013	4.27867	4.92506	5.40565	2.75218	2.78255	3.6361	28.5538	27.8429	20.2754	19.738	18.6471	20.8837	231.975	205.264	188.383	172.642	184.706	167.494	148.415	159.553	159.961	161.903	160.687	166.295	165.001	165.084	94.0896	96.2031	57.1983	111.581	106.481	-22.5069	-112.984	-161.37	13.1882	8.28876
3590	Cc1ccc2nc(Sc3ncccc3C(=O)O)n(Cc3ccccc3)c(=O)c2c1	8	22.8223	301.827	6.77457	22	7	3	3	0	248.67	1404	9.1401	6.05667	4.91964	5.40587	4.02879	3.56389	4.02712	30.5217	29.6735	25.43	24.8704	22.96	18.5625	256.993	237.977	229.961	233.733	239.565	157.184	143.061	148.72	150.23	158.712	154.479	158.269	149.51	154.472	43.9859	11.6471	6.93027	24.4451	10.2483	-79.1731	-47.6591	-31.097	9.99764	0.191399
3929	CC(=O)OCC1=C(C(=O)O)N2C(=O)[C@@H](NS(=O)(=O)c3ccc(NC(=O)Nc4ccccc4)cc3)C2SC1	6	28.9138	5927.91	9.99576	12	14	4	8	0	460.581	2070	10.2185	5.24044	6.27083	7.80645	4.192	4.32582	6.29601	35.0847	34.6613	25.7023	25.5586	24.2623	23.3125	242.757	218.736	191.636	197.987	198.529	161.486	146.916	152.724	156.457	159.801	162.896	159.986	159.739	158.835	27.3376	42.2931	-74.4943	-38.7468	-53.0852	1.76453	-40.5354	44.6261	8.81385	-3.61161
4207	O=C(O)c1cc(-c2ccccc2)nc2cc(Cl)ccc12	2	15.7228	131.469	5.57192	16	4	1	2	1	161.255	1052	9.32016	3.6643	2.07207	5.37518	3.77063	3.77069	3.0654	35.0667	29.875	24.0154	23.5873	24.8085	17	275.572	245.145	224.302	220.004	202.349	154.273	140.588	142.752	150.245	153.186	154.584	153.387	155.401	160.409	16.449	6.31797	0.537723	-11.9615	-1.74672	-49.7398	-48.9419	-12.7277	4.68	-1
2576	COc1cccc(-c2cc(-c3ccc(-n4ccnc4)cc3)nc(N)n2)c1	12	20.4942	192.502	6.21562	23	6	5	1	0	147.694	1046	8.51163	4.58228	4.16438	3.43475	2.87222	2.95077	2.81279	24.3256	26.7826	20.3563	18.8152	16.8354	16.3562	242.598	228.666	190.121	183.678	183.81	160.957	147.628	153.59	154.273	153.591	158.074	161.124	161.731	160.169	46.0806	-8.98486	-69.1514	-30.3505	1.99621	-18.0941	11.5717	-11.7058	10.0103	-1.45538
1655	N#CSc1c(-c2ccc(-c3cc4ccccc4oc3=O)cc2)nc2sc(Cc3noc4ccccc34)nn12	16	30.8581	615.339	7.75717	33	10	5	3	0	252.951	1972	10.9224	7.0947	7.36471	4.77267	3.37633	3.34112	3.42843	37.2075	34.5254	28.1795	27.625	27.125	27.6824	290.265	259.702	240.717	246.938	252.389	153.797	141.611	144.101	149.276	153.182	155.181	152.253	151.123	153.261	50.1111	7.77778	-21.6667	-84.7778	-35.3333	-6.44444	-16.5556	12.6667	9.60413	-0.544678
1261	Cc1ccc(-[n+]2noc(O)c2CN2CCOCC2)cc1	18	15.6538	148.11	5.6911	11	6	3	3	0	136.639	861	7.47368	3.09859	1.40984	3.59576	3.36034	3.22887	2.19945	22.6579	25.325	17.0814	13.7629	14.5493	10.5902	207.049	180.827	157.335	175.025	153.644	165.624	150.596	159.758	161.214	165.181	166.25	166.358	165.751	160.116	51.1551	4.27147	-11.5928	38.0499	5.11911	-136.942	-80.651	-27.5319	8.21884	-1.65651
288	O=P(OCc1ccccc1)(OCc1ccccc1)Sc1ccccc1	25.4	19.2508	202.898	6.22899	18	5	0	3	0	165.851	1412	6.81257	3.68539	2.93878	3.76933	3.49029	2.91171	2.40779	32.0909	35.3478	22.7826	21.9368	19.1236	14.6531	247.81	205.074	212.455	218.9	211.993	155.068	139.253	146.401	149.743	158.154	155.202	153.179	150.656	151.313	-16.1749	-32.0757	14.6755	7.65812	36.7885	-37.0541	-52.7701	-34.086	2.32335	-4.10176
507	CC(=O)Nc1cccc(OCc2cc(=O)oc3ccc(Cl)cc23)c1	23	18.7415	373.372	6.79804	16	6	1	4	1	205.033	1256	9.62118	4.67384	5.06433	5.39561	3.30815	3.15047	3.3995	33.0526	29.275	22.8	21	20.6452	20.9649	254.509	224.836	195.553	191.798	201.503	157.693	143.428	149.041	154.487	154.872	157.526	157.828	156.114	155.407	43.081	-6.29647	-69.1213	-6.95373	-31.3622	28.2058	-8.98817	-20.6088	4.55956	-1.49861
821	CCN1C(N2CCN(C(=O)N/N=C/c3ccc([N+](=O)[O-])o3)CC2)=NS(=O)(=O)c2ccccc21	20	25.7976	4095.29	9.51152	11	14	7	6	0	392.299	1688	10.4897	3.58454	4.02492	7.2648	3.55228	3.27364	2.87015	31.2593	33.5088	23.5317	22.2296	14.2754	16.7477	227.739	201.335	177.454	162.446	141.665	166.502	151.798	161.487	163.091	164.761	166.77	162.652	167.599	167.228	54.8647	96.6941	7.84225	-110.807	-133.431	-27.7846	86.6054	70.9669	10.6204	3.69444
1332	CN1CCN(c2nc(Nc3ccccc3)nc(Oc3cc(=O)oc4ccccc34)n2)CC1	17	25.5533	357.536	7.04239	22	9	6	3	0	211.972	1336	8.96296	6.29245	5.34211	3.92541	3.8945	3.31709	3.15034	24.7407	27.1207	19.44	17.916	21.6981	20.693	232.107	199.452	186.056	220	214.808	163.116	148.735	158.922	159.519	164.499	167.837	162.769	165.141	155.758	80.952	67.3608	55.3608	135.085	16.4938	-90.716	-140.143	-96.572	8.67627	1.03155
2931	CSc1ccc(NC(=O)Nc2c(-c3cccc(F)c3)nc3ccccc3c2O)cc1	10	23.4605	628.385	7.54176	22	7	3	2	1	268.698	1458	9.09259	5.84967	4.88779	5.59787	3.83974	4.21451	4.23989	30.375	29.3725	23.3301	21.4673	22	19.0891	254.936	231.78	204.436	207.538	210.028	159.589	144.802	147.453	154.818	157.588	160.76	159.051	158.51	160.29	46.4358	41.2193	-10.6422	6.8262	24.1227	-12.2205	-29.11	-53.4713	10.1875	-0.1875
1881	COc1ccc(N2NC3NC(=N)C4CCCCC4C3N2)cc1	15	17.5849	213.286	6.15109	6	6	5	1	0	127.444	908	5.82222	2.36364	2.08696	2.8321	2.05529	2.2215	2.40459	20.1778	23.5	14.9612	12.9712	12.9091	12.4638	198.315	166.406	130.5	129.356	154.225	167.188	152.353	156.969	163.798	167.177	170.852	170.662	164.417	161.504	46.68	11.44	-28.16	-38.36	-7.28	1.56	-30.48	-44.16	10.4726	-1.32049
1682	Fc1ccccc1-c1nnc(-c2ccccc2COc2ccc(Cl)cc2)o1	16	21.2702	350.974	6.85396	23	6	2	2	2	194.783	1366	10.0391	6.06136	5.03175	4.75081	3.07462	3.18144	3.31372	33.3171	30.0227	23.5233	22.3412	22.8657	21.0909	266.572	226.869	203.726	230.848	245.307	158.942	143.194	147.639	154.004	160.96	164.463	155.334	148.717	154.988	38.7673	11.5406	12.9393	2.05335	-25.4328	-53.8424	-30.19	-41.2788	5.23617	-3.16419
30	Cc1ccc(-c2nn(CC(=O)NNC(=S)Nc3ccc(F)cc3)c(=O)n2N)cc1	35	22.4149	1613.31	8.45075	17	11	7	2	1	293.903	1474	9.75414	4.92181	4.91892	6.25325	3.91272	3.92219	4.16583	31.3617	29.0612	22.9192	19.8077	21.7531	22.1486	236.013	205.248	188.716	181.794	179.95	167.474	155.243	158.855	162.404	168.282	167.248	166.524	168.531	167.504	52.4359	6.62442	-52.1419	-41.9671	51.1594	-19.1005	-44.6087	-58.8932	7.64554	-6.99049
1020	O=C(/C=C/c1cn(-c2ccccc2)nc1-c1cccs1)c1ccc(Cl)cc1	19	21.2702	378.074	6.92834	22	5	2	1	1	158.675	1514	7.95356	4.63291	4.40379	3.77799	3.02516	2.68479	2.9742	36.0476	31.0889	22.9773	22.9167	23.557	21.4268	275.89	226.78	227.475	231.239	232.151	153.492	140.471	143.388	151.985	155.004	153.411	150.512	148.378	152.23	26.5503	-3.51065	-11.0687	-40.2693	-21.0183	-10.0101	9.74824	-14.2481	5.56633	-4.2398
2408	CCC1C(C#N)=C(c2ccco2)OC1(c1ccccc1)c1ccccc1	12	20.1999	234.786	6.41418	17	3	1	2	0	161.229	1024	7.55556	2.22517	1.5	3.58287	2.94194	2.69647	2.35758	22.7556	25.25	19.2593	20.6864	11.8411	8.93636	244.613	218.64	223.662	191.759	152.802	155.819	140.196	144.839	151.291	150.377	149.796	152.716	159.637	163.587	56	56	53	-41	-138	-111	-56	13	15.8726	11.4933
2065	O=C(CSc1nnc(Cn2cnc3ccccc32)o1)Nc1nc2ccc(I)cc2s1	14	24.1391	298.404	6.79706	23	11	6	2	1	183.891	4440	10.184	5.66593	5.63475	4.27653	3.61044	3.3043	3.14414	103.256	41.2766	35.2989	37.8953	35.8167	41.4364	292.892	243.904	224.299	229.006	233.079	157.564	146.086	150.903	154.795	158.918	160.295	158.741	158.561	157.008	40.324	-12.7646	-90.0128	-38.9919	44.9686	21.3487	-29.1778	-22.1965	3.37966	-3.22823
3894	CC(=O)c1nnc2c(C#N)c(N3CCCCC3)nn2c1C	6	16.3085	152.694	5.77037	9	7	6	1	0	178.167	878	8.64865	2.7377	1.73684	4.81532	3.24884	3.44536	3.24854	23.7297	26.0513	19.6136	18.7889	15.2623	11.9123	218.996	190.668	180.104	177.612	172.745	167.208	151.114	159.848	164.715	168.26	166.315	166.91	163.851	166.8	93.7896	106.61	77.5004	5.23594	-113.061	-141.222	-146.66	-50.7794	13.4536	8.1198
697	COc1ccc(F)cc1-c1cccc(-c2nn(CCCCF)c(=O)o2)c1	21	19.856	288.063	6.61869	17	7	2	3	2	292.944	1154	10.1818	5.70588	5.32353	6.65783	3.94716	4.54935	3.71487	26.2273	27.0217	19.8211	19.0619	18.2824	18.1912	229.459	202.733	195.759	188.561	171.547	166.444	147.239	157.214	160.191	161.619	161.994	161.637	166.877	162.516	66.876	46.5289	2.61157	-83.876	-68.8595	-72.8843	1.32231	26.876	9.33884	5.12397
2867	Cc1nn(-c2ccccc2)c(Cl)c1/C=C/C1=Cc2c(sc(N3C(=O)[C@@H](Oc4ccc(Cl)cc4Cl)[C@H]3c3ccccc3Cl)c2C#N)C(C)(C)C1	10.56	39.1968	2986.51	9.59109	28	11	4	2	4	277.198	3132	7.88135	4.50837	3.97178	3.59998	3.23144	3.04098	2.78833	40.6753	31.6024	28.4098	25.4265	24.21	26.875	272.502	248.319	236.33	235.047	228.847	155.736	141.444	146.678	150.219	154.633	151.748	152.895	153.457	152.992	96.4686	26.1516	-5.65474	69.0195	-28.4765	-64.4212	-132.057	-125.412	21.9474	-1.68241
4053	C[C@@H]1CC[C@H]2[C@@H](C)[C@@H](O)O[C@@H]3O[C@]4(C)CCC1[C@@]23OO4	5	16.4444	113.515	5.42508	0	5	0	5	0	143.792	884	6.22727	0.0681818	0	3.26799	2.21229	1.97822	1.36667	20.0909	23.1064	17.2162	12.9235	5.03409	1.93333	185.925	177.841	122.254	104.09	83.7641	165.164	146.123	153.777	157.766	162.97	166.659	168.82	168.751	181.222	80.75	85.75	0	-127.25	-128.5	-136.25	9	102	16.6839	3.89876
2591	COc1ccc2nc(C)cc(-n3cc(CNC4CCCC4)nn3)c2c1	12	19.7871	378.944	6.85368	15	6	5	1	0	130.194	1016	6.75	2.61702	2.09333	2.71238	2.66176	2.4935	2.36481	21.1667	24.2941	15.7304	15.1217	13.8191	13.4	212.39	176.753	177.31	169.667	152.183	164.664	148.953	156.284	162.071	164.42	161.638	163.875	169.382	165.099	81.6875	47.6875	12.6875	50.6875	28.6875	-49.875	-122.375	-117.312	11.2721	2.68533
1141	COc1ccc(F)cc1-c1cccc(-c2nnc(SCCCC#N)o2)c1	18	19.7871	526.085	7.22097	17	7	3	2	1	223.365	1312	9.53439	5.65297	5.63388	5.3182	3.4347	3.85917	3.8301	31.2381	30.0227	22.6941	21.7093	20.8082	21.4754	249.541	220.12	209.83	198.535	190.254	161.507	144.331	150.684	154.602	157.322	158.573	160.283	164.267	161.474	63.8327	40.4958	-7.9355	-70.4636	-75.7229	-46.801	-5.355	33.7281	8.30612	3.73469
1464	COc1ccc(Cc2nnc3sc(-c4cc(-c5ccccc5)nc5ccccc45)nn23)cc1OC	16.04	28.0012	559.301	7.57945	30	8	5	2	0	178.726	1622	8.86508	5.65608	5.06006	3.19153	2.77428	2.74329	2.83064	28.9643	29.541	24.5983	21.9213	21.4762	21.2883	255.962	244.042	217.497	220.479	207.381	157.878	144.266	150.051	151.743	153.951	156.451	155.963	158.001	158.86	76.8669	9.33447	-18.0815	-60.4588	-48.8458	38.4301	101.577	-39.1662	16.7286	6.21556
2433	CCOC(=O)C1=C(C)N=c2s/c(=C\c3ccc(Cl)cc3)c(=O)n2C1c1ccc(SC)cc1	12	24.8628	499.534	7.37683	17	8	2	3	1	226.707	1976	7.85837	3.48343	2.56934	4.27748	3.76279	2.95202	2.4141	37.283	31.6071	26.6637	25.0806	21.8271	22.9845	257.556	243.676	223.344	216.165	199.479	156.377	141.474	149.119	150.074	152.379	153.924	154.018	156.812	156.275	78.9352	70.3335	8.43826	12.0635	-6.52257	-90.5248	-109.433	-70.8142	16.7686	10.9633
3362	COC(=O)C1=C(C)NC(C)=C(C(=O)OC)C1c1c[nH]nc1-c1ccc(Cl)cc1	9	21.3962	244.077	6.5271	11	8	3	4	1	231.366	1432	8.74177	2.34253	2.17539	4.82013	4.00975	3.0408	3.24766	29.8333	27.54	24.3918	22.0968	15.0892	14.3636	233.156	246.229	206.748	180.834	152.611	162.04	147.315	154.606	150.671	156.202	156.784	161.317	165.672	164.807	80.8457	43.7683	-32.0375	-57.8554	-65.1416	50.5491	-191.345	-174.066	18.8889	10.3333
4023	CSc1ccc(-c2[nH]ncc2-c2nc(-c3ccccc3)c(-c3ccccc3)[nH]2)cc1	5	23.799	325.571	6.88419	28	5	4	0	0	139.92	1372	7.24889	4.32143	3.45299	2.7984	2.61287	2.61282	2.52651	27.44	28.0556	21.0189	20.3661	20.0446	17.2991	255.593	230.627	208.834	215.833	220.256	156.41	143.479	145.995	150.083	155.456	158.169	155.045	151.594	155.746	50.6585	37.9444	10.6633	18.6332	-12.5876	-41.1575	-59.949	-82.0992	12.8304	2.6912
4039	COc1cc2cc(O)c3oc4ccccc4c4ccc(c1=O)c2c34	5	19.6134	177.099	6.05218	20	4	0	4	0	188.056	988	10.6111	3.98485	2.95556	5.22377	3.78551	3.61153	3.27778	27.4444	28.85	26.4286	23.7143	15	13.1556	269.692	274.871	224.049	196.335	163.795	152.686	139.477	142.894	144.986	147.123	150.552	153.15	158.418	161.562	41.4568	25.5926	21.4815	-57.9136	-91.5802	-29.1728	27.037	-17.7778	14.0494	8.03704
3915	Cc1cccc(NC2OCCc3ccccc32)n1	6	14.1706	113.341	5.31818	12	3	2	1	0	92.8889	718	6.52941	2.18868	1.12766	2.73203	2.29012	2.35535	2.0461	21.1176	24.0278	16.5256	14.5897	13.3208	10.383	222.15	189.343	153.082	161.312	174.018	160.839	145.303	152.829	157.981	159.53	163.918	162.05	158.642	154.324	34.7578	-5.50865	-45.7405	-26.6817	5.56401	4.60554	-63.0657	-40.6332	6.07266	-0.512111
3683	COc1ccc(-n2c(S)nnc2-c2csc(N(C(C)=O)C(C)=O)n2)c(OC)c1	8	21.4366	237.512	6.49984	16	11	5	4	0	233.475	1642	10.0834	5.50129	4.97863	5.18833	2.89229	3.34923	3.51269	36.4889	32.2766	30.8375	31.9149	24.2791	23.6282	244.531	255.403	206.665	185.224	189.481	162.484	148.439	158.887	157.941	153.816	158.817	160.849	163.421	165.701	104.334	44.136	-86.5511	-43.7529	-47.7423	-28.5447	44.3387	-18.6205	18.7669	11.0538
4215	O=C(/C=C/c1ccc(O)cc1)c1c(O)cc(O)cc1O[C@@H]1O[C@H](CO)[C@@H](O)[C@H](O)[C@H]1O	2	23.8172	467.02	7.27777	12	10	0	10	0	410.083	1418	9.73585	5.98319	5.24	7.73742	4.81753	4.82446	5.12756	26.7547	26.8727	21.2868	19.2628	20.7479	19.184	221.54	194.138	172.075	192.019	196.05	161.988	147.199	149.423	158.144	161.878	162.389	158.686	157.162	159.054	-0.383766	-35.5902	7.37914	31.3912	-43.388	22.1566	-43.1926	-96.0231	9.70239	-6.92097
3346	N#CCCN1CCN(c2ccccc2)CC1	9	11.9804	107.256	5.14523	6	3	3	0	0	103.528	632	5.33333	2.05128	2.2963	3.13721	2.2399	2.5	2.25926	19.1515	22.2353	12.9634	10.8824	10.4872	11.4444	204.972	161.787	124.885	119.971	132.898	164.414	147.548	159.319	163.334	160.037	164.965	168.884	168.14	159.707	23.8108	-39.6602	-49.4206	-5.29109	22.7548	-14.6667	-6.2259	10.3471	3.93388	-4.30579
2880	CCCCCC(=O)N1CCN(C(=O)c2cc(-c3ccc(Cl)cc3)n(-c3ccc(F)cc3)n2)CC1	10	26.3579	1172.92	8.29103	17	8	4	2	2	293.033	1658	7.4775	4.04101	3.32282	4.72634	2.91019	3.28472	2.88786	26.7419	25.7692	17.8961	16.8718	18.302	16.6959	225.304	184.961	178.228	183.165	184.412	163.902	146.719	155.633	162.246	161.843	162.172	161.163	161.511	158.86	91.6262	69.7414	22.9633	-29.248	21.2521	24.3709	-25.0888	-19.8117	12.1197	0.608741
2978	COC(=O)C1=C(C)NC(C)=C(C(=O)OC)C1c1c[nH]nc1-c1ccc(-c2ccccc2)cc1	10	25.489	545.076	7.49485	17	7	3	4	0	257.333	1364	8.27586	2.75281	2.94326	4.43678	3.71245	2.96973	3.23877	23.5172	25.5246	21.4098	20.1974	13.9213	14.461	230.759	238.518	201.289	176.796	155.718	160.261	145.457	151.902	149.578	154.481	155.881	160.344	164.287	162.457	87.4518	41.8454	-37.6136	-68.1296	-54.2128	79.0785	-164.823	-187.488	21.5806	9.96314
3082	Cc1cccc(OCc2ccccc2-c2nc(-c3ccc([N+](=O)[O-])cc3)cs2)c1	10	22.7938	353.293	6.93201	23	6	2	3	0	235.92	1392	8.77541	5.08812	4.01465	5.01958	2.63848	3.13545	2.85782	29.617	29.24	21.899	20.5	21.3218	21.1209	256.021	227.863	198.034	222.64	221.072	155.978	141.986	145.713	150.004	155.551	156.908	149.589	151.784	149.968	45.1777	4.23409	-37.499	-39.6327	-20.9284	30.0799	21.171	-45.8136	8.02535	-4.46446
365	Cc1nn(-c2ccccc2)c2nc(S)nc(-c3ccc(Cl)cc3)c12	24	19.1774	215.526	6.24855	21	6	4	0	1	109.588	1402	8.40307	2.61772	2.02411	2.96183	2.72582	2.24829	2.09219	37.8919	31.025	25.9231	25.4557	19.1786	22.4688	273.011	245.421	247.703	227.913	182.257	156.937	143.834	148.888	155.062	156.691	154.788	152.085	157.481	160.304	56.6714	35.46	8.65963	-32.9868	-117.271	-116.999	-2.65722	29.6869	9.75603	5.56099
1526	Clc1ccc(OCc2ccccc2-c2nnc(SCc3ccc(Cl)cc3Cl)o2)cc1	16	23.5414	354.969	6.97064	23	8	2	2	3	136.853	2156	8.33909	5.4414	4.69444	3.04117	2.9576	2.81701	2.69389	47.9111	34.7708	29.0645	28.7474	28.1233	25.0132	284.705	243.461	207.377	243.305	246.927	154.854	141.309	145.6	149.898	156.403	160.197	154.729	150.466	153.975	38.5319	-10.2775	-37.5274	-5.9037	11.7373	-25.8889	-31.1225	-25.882	3.72	-6.12
3707	N#Cc1c(F)c(F)c(Nc2ccc(Cl)cc2)c(C#N)c1F	7.8	15.7513	167.205	5.86116	12	7	3	0	4	327.783	1188	15.754	7.77124	7.30808	12.607	8.08497	6.56494	6.56332	45.6923	35.8148	34.037	32.3462	28.6765	39.7727	301.912	267.678	252.316	260.418	230.726	169.702	147.202	149.703	163.293	173.393	169.501	163.66	173.263	176.508	13.3978	13.9229	77.262	97.8015	30.015	-41.0616	-113.118	-78.3748	3.85947	-4.37722
3517	N#Cc1ccc(Cn2cc(C(=O)NN)c(=O)c3ccc(C(F)(F)F)cc32)cc1	8	21.6449	335.288	6.84461	16	9	4	2	3	429.535	1264	12.9268	7.34375	6.9625	10.4765	4.55795	6.27749	4.9901	30.8293	29.814	24.5055	21.4615	21.4479	21.15	253.368	239.992	208.886	214.135	193.908	169.257	150.186	157.687	153.387	165.067	163.65	159.746	169.865	164.013	32.9851	48.9917	-6.81083	-67.5051	-15.4747	-57.655	-26.0553	40.21	5.92564	-3.99286
1222	CC(C)N1CCN(c2nc(Nc3ccccc3)nc(Oc3cc(=O)oc4ccccc34)n2)CC1	18	27.0365	392.055	7.19518	22	9	6	3	0	221.75	1412	8.23333	6.27679	5.19841	3.69583	3.2627	3.31597	3.14131	23.5333	26.0781	18.4196	17.0263	22.1071	20.3413	225.086	192.75	163.586	183.453	217.806	163.359	148.324	158.3	161.18	162.443	167.256	168.103	163.283	158.911	101.271	96.2889	48.9589	148.102	121.437	14.4433	-121.042	-129.46	11.46	1.7
4498	COC(=O)c1c(C)nc(C)c2c1C(=O)C(Cl)=C(NC[C@H]1O[C@@H]3OC(C)(C)O[C@@H]3[C@H]3OC(C)(C)O[C@H]31)C2=O	0	29.7172	356.411	7.18442	6	12	2	9	1	336.603	1892	9.29704	3.32506	4.5541	5.10004	3.37925	2.96539	3.19798	28.6667	27.4429	23.865	21.6243	16.3085	19.1438	218.598	213.469	179.118	163.938	154.264	163.518	146.408	157.028	159.336	157.817	161.152	163.386	165.609	161.143	153.161	94.2897	-139.833	44.7367	-68.2583	-201.678	-49.2408	134.653	24.6777	13.7521
2320	O=c1[nH]cnc2nc(-c3ccc(Cl)cc3)cc(-c3c(-c4ccccc4)[nH]c4ccc(Cl)cc34)c12	13	27.5414	410.759	7.24178	31	7	4	1	2	191.233	1826	9.0642	5.72148	4.28003	3.82466	3.23416	3.23748	3.21417	36.52	30.8	25.2155	24.5169	24.4133	23.7095	282.598	255.65	259.109	260.821	238.573	154.977	142.616	144.848	149.815	152.092	150.595	149.267	152.359	157.994	33.1115	10.4107	25.8307	23.6028	4.94048	-13.0412	-99.0193	-154.304	9.192	2.0016
1435	Cn1c(N2CCN(Cc3ccccc3)CC2)nc(-c2ccco2)c(C#N)c1=O	17	21.8964	506.878	7.25789	17	7	5	2	0	209.417	1150	8.20408	2.3871	2.77551	4.27381	2.93645	2.65726	2.55669	23.4694	25.9615	18.819	17.0462	12.7177	12.7857	228.489	198.491	183.369	166.768	148.655	162.715	147.466	158.628	158.257	164.615	161.045	160.295	166.484	161.793	68.3928	26.2316	25.8667	35.0737	10.7218	-76.0454	-120.202	-19.8367	11.873	-1.09663
2179	Cc1ccc(C#N)c(N2CCN(CC#CCOC(=O)c3sc4ncnc(N5CCOCC5)c4c3C)CC2)c1	14	29.7031	14026.3	10.8837	15	10	6	3	0	260.17	1780	7.77124	2.62549	3.22404	3.82603	2.83941	2.54363	2.76647	26.1765	27.1667	20.8854	17.6133	13.2353	14.7705	227.894	209.273	175.881	180.456	137.372	162.19	146.495	158.742	156.084	157.306	162.412	155.379	166.661	167.107	93.5475	-5.16032	-29.3218	-3.04998	-114.194	-36.7489	55.6144	-42.0338	17.2422	3.92734
3132	Nc1[nH]c(=S)nc2c1C(c1c(-c3ccccc3)[nH]c3ccccc13)C=C(c1ccc(Cl)cc1)O2	10	27.5414	404.329	7.22601	27	7	4	1	1	163.352	1796	8.11414	4.80106	3.56693	3.08212	2.83262	2.86006	2.76051	33.8868	29.5517	23.5317	23.0074	21.6048	20.4217	270.112	243.059	232.46	237.964	222.312	155.524	144.011	144.647	150.193	153.212	152.448	150.804	153.172	157.374	40.1648	15.4638	-2.37821	-23.7245	0.799199	7.26069	-109.47	-132.331	11.3895	3.32431
4320	OC1COc2ccccc2/C=N\n2c(nnc2-c2cccnc2)SCCCSc2nnc(-c3cccnc3)n2/N=C\c2ccccc2OC1	0	38.6767	689.648	8.12542	34	15	10	3	0	284.146	2448	8.84669	4.80791	4.572	3.59678	2.96356	2.96921	2.71427	30.9873	30.5647	24.2229	23.1648	23.6695	20.536	248.202	213.333	218.89	221.539	210.713	161.291	147.594	152.773	157.373	162.464	161.45	157.707	157.668	157.594	90.895	44.4018	60.3571	-57.801	-164.033	-162.066	-126.445	-52.1098	13.2355	1.30476
3962	Cc1cc2c(cc1C)Nc1c(c(=O)oc3ccc([N+](=O)[O-])cc13)N2	5	19.3558	169.865	6.01047	16	7	3	4	0	258.306	1028	11.1351	6.14516	5.33333	6.98123	4.52619	4.22043	5.96187	27.7838	28.95	24.7143	19.3838	20.2419	19.3725	248.632	245.536	182.416	201.562	195.813	160.404	147.733	149.489	151.83	158.77	163.356	162.178	158.683	158.472	61.4441	60.3061	-23.3755	-15.4251	56.9401	17.2637	-14.0197	-77.1527	11.1344	-1.19649
2678	Clc1cc(Cl)c(Cl)c(-c2nnc3sc(-c4cccc5ncccc45)nn23)c1	11	21.925	222.308	6.39732	24	9	5	0	3	113.63	2024	10.2646	7.14156	7.06838	3.24658	2.92596	2.99693	3.07012	57.8286	39.7436	39.7838	40.3286	41.6222	31.7949	319.921	290.491	273.45	273.694	281.754	155.133	144.101	146.419	151.31	154.08	157.544	157.469	155.384	150.907	26.2376	-1.75129	19.5885	-8.29982	-17.247	-14.7084	-28.9389	-43.0831	5	0
3747	O=C1NC(=S)/C(=C/c2ccc(Br)cc2)S1	7	11.6014	74.7595	4.71974	6	5	1	1	1	98.3732	2216	8.4741	3.78298	2.91632	4.68444	3.17104	3.7103	3.9056	105.524	45.0455	40.95	33.3636	59.3684	120.778	322.778	259.739	252.494	255.294	219.89	148.97	139.457	140.554	144.438	149.661	149.058	147.315	157.839	163.755	1.42231	-30.9247	3.33122	2.12896	11.2752	-3.09017	-10.2817	-8.09003	-0.0589569	-4.00454
3721	CC(C)c1cc2c(cc1O)[C@@]1(C)C(=O)CCC(C)(C)[C@@H]1[C@H](O)C2=O	7	19.0288	170.636	6.015	6	4	0	4	0	253.625	1002	6.16	1.26804	0.395604	5.0725	3.62879	3.32216	2.69872	20.04	22	17.9722	14.2653	11.9588	8.3956	202.882	207.935	142.85	120.657	142.183	161.711	143.234	149.58	149.999	157.514	161.22	167.559	161.011	164.778	79.9872	67.3328	25.3584	-13.0144	-88.92	-106.576	-152.621	-109.142	23.4272	5.0528
1898	CCOC(=O)C1=C(C)NC(C)=C(C(=O)OCC)C1c1c[nH]nc1-c1cc(Cl)sc1Cl	15	22.8794	277.658	6.725	10	10	3	4	2	229.875	1978	8.1893	2.51341	1.66524	4.50736	3.87116	2.82237	2.73324	38.7843	30.9623	25.6476	28.5289	18.6264	23.2244	241.634	234.214	218.623	199.836	171.078	161.536	146.63	154.144	155.332	154.615	156.158	158.322	163.412	163.546	91.7555	98.2749	1.26702	-42.1413	-114.063	42.7691	-194.916	-175.816	19.5556	19.7778
2934	Cc1ccccc1OCc1ccccc1-c1nnc(-c2ccc(Cl)cc2)o1	10	21.2702	284.404	6.64365	23	5	2	2	1	137.783	1324	8.26375	5.12329	3.82147	3.13143	2.69336	2.80596	2.71621	30.0909	28.1064	21.8696	19.0515	22.5616	17.3933	256.118	223.921	190.168	211.803	245.08	156.696	142.351	147.501	150.713	158.141	162.088	157.249	146.491	152.102	53.8093	26.0052	-3.91307	-39.8055	-3.41179	-9.42077	-45.8041	-33.0624	8.4375	-3.25
2857	Cc1nn(-c2ccccc2)c(Cl)c1/C=C/C1=Cc2c(sc(N3C(=O)[C@@H](Oc4ccc(Cl)cc4Cl)[C@H]3c3ccc(Cl)c(Cl)c3)c2C#N)C(C)(C)C1	10.85	40.0133	2930.31	9.5923	28	12	4	2	5	276.787	3420	7.98012	4.61069	4.13856	3.59463	3.21842	3.04824	2.77614	44.4156	32.759	30.5956	25.3507	26.1826	28.0893	278.644	253.315	236.406	236.913	231.841	155.519	141.359	146.577	150.042	154.643	151.745	152.765	153.342	152.945	95.2507	20.5771	-11.6462	65.3003	-32.3065	-62.7276	-120.588	-100.154	20.8251	-5.08973
1872	Cc1c(/N=C/c2ccco2)c(=O)n(-c2ccccc2)n1C	15	16.349	226.506	6.16471	16	5	3	2	0	151.139	866	8.61111	2.91549	2.01724	4.1983	3.32786	2.83568	2.4454	24.0556	26.3947	21.0141	18.4605	13.8451	11.1552	233.479	211.191	180.388	187.152	157.453	161.308	147.326	155.995	160.452	158.838	162.868	157.066	162.023	163.321	61.358	31.0988	-26.4568	-65.9506	-69.3457	-3.23457	-29.679	-27.7284	11.6312	2.17747
3856	O=C(c1cccnc1Nc1nc2cc([N+](=O)[O-])ccc2s1)N1CCNC(Cl)C1Cl	6	22.8913	210.908	6.41613	15	12	6	3	2	268.82	1946	10.178	5.10847	4.46391	6.25162	3.21942	3.05249	2.94865	45.2558	35.087	30.46	27.4848	25.9524	26.5	263.924	227.187	225.866	232.467	210.392	163.065	150.425	155.947	160.194	162.262	161.467	159.319	162.212	159.756	35.6619	21.6802	26.7048	-30.2012	-21.5863	-47.3586	10.7066	5.48754	4.56896	-2.62574
213	COc1ccc(C2SC(S)NN2C(=O)c2ccc(-n3c(-c4ccccc4)nc4ccccc4c3=O)cc2)cc1[N+](=O)[O-]	27	33.2957	581.731	7.80109	28	12	5	5	0	376.364	2180	9.84236	5.10717	4.89702	5.79021	3.44688	3.18459	3.89494	33.5385	31.0857	25.5338	25.1049	21.1183	19.5427	260.192	240.187	231.936	217.729	209.246	157.77	144.967	148.78	152.416	156.882	155.59	154.349	152.177	159.271	72.0064	48.8627	39.3695	-55.7809	-173.064	-191.644	57.412	115.314	15.2	4
457	CCCCCC[C@@H](O)C/C=C\CCCCCCCC(=O)N(C(=O)NC1CCCCC1)C1CCCCC1	23.2	26.3698	88824.4	12.6754	0	5	2	3	0	274.889	1462	3.34783	0.953307	0.757246	2.98792	2.36275	2.09339	1.83031	15.8913	18.6774	9.85821	10.2928	9.92218	8.59058	173.973	127.647	134.241	140.047	133.687	165.922	146.31	155.063	164.767	166.117	165.949	163.392	162.76	163.575	57.5671	42.2552	61.8544	42.9754	-82.673	-125.594	-115.862	-60.2174	7.80104	-3.29442
3468	Cc1ccc(-c2cc(-c3c(-c4ccccc4)[nH]c4ccc(Cl)cc34)c3c(N)[nH]nc3n2)cc1	9	26.8343	398.785	7.18235	30	6	5	0	1	160.422	1526	7.87934	4.74359	3.3758	3.02683	2.96559	2.9025	2.7185	28.7925	27.8103	22.45	20.553	21.4295	19.6178	259.947	243.796	237.467	248.151	222.088	157.475	145.18	146.249	150.523	154.019	153.329	150.745	155.12	160.018	55.3089	34.6541	11.5931	27.8211	19.5512	-27.0501	-148.269	-124.673	15.1403	4.09897
409	CCN1CCN(CC2SC(c3ccc(OC)c(OC)c3)N(c3ccc(Nc4nc(Oc5cc(=O)n(C)c6ccccc56)nc(N(C)C)n4)cc3)C2=O)CC1	24	42.5285	2035.54	9.30491	28	15	9	5	0	358.587	2466	7.68126	4.65885	4.20503	3.62209	2.97284	2.81283	2.83182	24.9091	26.5238	21.3537	18.4522	18.6875	18.3811	220.045	211.054	177.512	183.799	189.053	163.657	148.407	160.082	156.513	159.815	160.544	162.061	161.217	157.954	168.882	94.1858	8.8855	54.559	37.9453	-44.3696	38.1496	-91.7785	30.6667	7.77778
2288	COc1ccc(C(=O)CC(Sc2ccccc2)c2ccco2)cc1	13	18.4133	164.359	5.97752	17	4	0	3	0	161.837	1186	7.39153	3.87843	2.95062	3.85326	3.08094	3.21162	2.86271	28.2381	27.8182	21.5455	21.0345	18.2235	15.3333	244.662	210.523	189.246	195.029	202.501	155.431	140.121	146.085	150.667	150.654	153.882	154.772	152.748	154.619	32.0338	-31.5042	-77.1124	-40.9494	92.4122	53.1466	-84.7027	-72.3258	6.55556	-4
2510	O=C(NO)Nc1nc(/C=C/c2ccccc2)nc2sc3c(c12)CCCC3	12	20.4537	577.801	7.31474	15	7	4	2	0	193.142	1282	7.96465	4.25703	3.26506	4.3896	3.49798	3.37305	3.09583	29.1364	28.7234	20.6699	21.1429	21.3494	17.6265	241.117	204.532	204.736	209.788	200.499	160.473	146.591	149.964	156.419	156.597	159.403	161.974	158.848	159.783	41.9403	37.5528	53.045	22.3095	-2.82828	-75.55	-105.433	-84.0487	8.31405	5.5124
3043	Nc1nc(COC(=O)c2cccc([N+](=O)[O-])c2Cl)cs1	10	15.2344	143.993	5.66291	11	9	3	4	1	247.175	1352	12.2875	5.96296	5.00898	8.82769	6.91934	4.04424	4.05848	48.2857	37.6552	32.6863	34.2075	33	33.9394	271.557	245.407	222.377	203.29	246.996	161.61	149.828	151.118	156.305	161.014	161.799	163.616	156.73	161.188	22.2051	16.7017	-8.76442	-60.2431	2.83623	25.1242	-17.6392	-36.4754	3.61735	-2.29082
226	Cc1cc(SCc2nc3ccccc3[nH]2)nc(SCc2nc3ccccc3[nH]2)n1	27	23.363	199.416	6.36011	24	8	6	0	0	136.84	1580	7.80615	4.90244	4.62222	2.91149	2.35912	2.45257	2.88527	33.617	31.5686	25.0825	24.3196	22.4268	23.64	257.592	222.637	209.016	208.038	198.883	159.006	145.711	150.1	158.058	158.202	156.171	155.654	159.141	160.73	57.8405	14.8504	-127.81	-87.5854	9.33887	89.9065	92.3604	-95.8497	7.37257	-0.771842
684	Cc1cc(O)c(C(c2c(O)cc(C)oc2=O)c2coc3ccccc3c2=O)c(=O)o1	21.2	23.6959	221.707	6.49997	22	8	0	8	0	342.861	1320	11.5652	6.35398	4.32	7.4535	8.43271	4.20256	4.25	28.6957	28.9796	25.3627	24.3109	20.8584	20.21	250.996	249.853	225.27	225.138	206.968	157.212	142.66	146.89	149.307	154.283	154.706	157.052	156.44	152.209	65.242	50.9887	-46.6427	-9.431	-67.5406	203.979	-104.306	-181.384	14.2722	5.91115
2301	O=C(O)C(=O)/C=C/c1cn(-c2ccccc2)nc1-c1ccc(Br)cc1	13	19.3677	247.065	6.42594	17	6	2	3	1	228.578	2212	9.65966	5.84016	4.72125	6.01522	3.58367	3.8326	3.71244	58.2105	32.325	26.3038	22.4026	27.6579	23.3289	270.793	228.578	225.943	231.086	222.974	156.09	143.175	145.745	153.486	156.982	155.608	152.173	152.545	153.895	24.1412	3.7347	0.482162	-46.5238	-26.1716	4.70674	25.3579	11.745	4.66482	-5.10111
3977	CC(=O)c1cc(C(C)=O)c(OC(=O)c2cccc(Cl)c2)cc1OC(=O)c1cccc(Cl)c1	5	24.6741	332.275	6.96912	18	8	0	6	2	321.455	1842	10.4419	5.80453	5.71401	6.69698	5.96835	4.10269	4.65257	38.375	30.96	26.9495	27.04	23.4815	23.8348	270.167	245.355	230.494	240.79	229.188	155.224	140.236	146.12	150.513	154.016	155.094	151.144	152.096	154.68	68.0793	44.5696	-33.4403	-14.716	-42.4454	-12.2664	-138.719	23.8327	8.625	-2
4172	O=C(O)c1ccc(NC(CC(=O)c2cc3ccccc3o2)c2ccc([N+](=O)[O-])cc2)cc1	3	25.0935	404.787	7.16651	21	8	2	6	0	367.306	1364	10.48	5.35345	5.70435	7.34611	3.55707	3.70211	3.66957	27.28	28.0943	20.4522	17.9106	19.0086	18.9478	250.178	214.463	186.843	206.855	202.47	158.135	144.456	146.032	154.141	157.983	158.018	154.965	156.339	157.189	35.2912	6.3344	-59.224	-80.3808	18.0672	10.344	-61.7936	-35.424	5.4528	-10.6464
1210	Cn1ncc2c(NCc3ccccc3F)ncnc21	18	14.9063	191.515	5.89682	15	6	5	0	1	157.389	806	9.80645	6.82051	5.52381	5.07706	3.17556	3.75641	4.18254	26	27.697	21.4603	17.8	21.8462	18.0714	234.592	209.718	163.061	174.306	217.333	168.616	152.433	161.339	161.645	171.041	165.666	171.87	158.47	172.93	42.7242	9.90947	-47.283	-86.2685	-15.3195	17.4287	25.8002	7.98335	7.45578	-1.40375
4237	N#Cc1c(-c2ccc([N+](=O)[O-])cc2)cc(-c2ccc(Nc3nc(Nc4ccccc4)nc(Nc4ccccc4)n3)cc2)nc1N	0.09	35.4813	1857.38	9.031	36	12	10	2	0	364.889	1830	9.82609	5.94304	5.6	5.28824	3.51778	3.48805	3.40337	26.5217	28.2568	21.5066	20.4277	20.3861	18.697	254.898	226.532	214.405	225.7	213.775	160.95	148.732	150.11	156.6	159.384	162.214	158.517	160.838	160.964	52.4957	31.4566	-12.0323	-5.25142	-82.8822	-95.7379	-117.278	21.0825	9.4812	-5.97816
418	CC(C)N1CCN(c2nc(Nc3ccc(C#N)c(C(F)(F)F)c3)nc(Oc3ncnc4ccccc34)n2)CC1	24	30.8373	333.794	7.1715	22	13	9	1	3	407.09	1708	10.6984	8.40517	6.97692	6.46175	3.47678	4.39033	3.63857	27.1111	28.1343	21.034	19.3758	25.2328	23.0462	233.251	208.562	166.465	185.235	225.134	170.348	151.243	164.18	161.707	166.518	172.877	172.865	167.629	163.002	109.713	161.238	83.1481	159.658	177.222	-25.9708	-65.1794	-114.414	10.6072	1.89368
933	O=S(=O)(Nc1nccs1)c1ccc(/N=C/c2c[nH]c3ccccc23)cc1	20	20.6814	205.633	6.28161	20	8	4	2	0	207.692	1498	8.97222	4.52222	3.78689	5.19229	3.44676	2.97253	2.75536	37.45	37.4884	25.9762	24.8554	21.25	18.6557	266.452	223.758	196.963	216.955	222.434	157.542	143.948	148.34	153.539	158.543	158.698	156.837	151.64	156.896	-9.81472	5.71139	-25.4622	-49.8981	26.59	-14.24	-33.1111	-1.25306	3.72	-5.64
1877	COC(=O)c1c(C(=O)OC)c2cccnn2c1C(=O)c1ccc(F)cc1	15	19.8726	255.511	6.49878	15	8	2	5	1	322.5	1160	12.5128	3.86735	3.72289	8.26923	5.73877	4.34864	3.78648	29.7436	29.7317	27.72	27.7976	17.2653	14.3735	250.59	259.018	249.205	220.509	179.882	162.552	146.125	154.408	154.019	157.636	155.337	157.507	162.989	161.126	63.236	40.3274	3.99211	-28.5483	5.52597	-186.522	-288.64	27.9362	14.3373	12.1302
4499	CCC(CC)(c1ccc[nH]1)c1ccc(C/C(=N\O)c2cn(-c3ccc(Cl)cc3)nn2)[nH]1	0	23.9469	589.575	7.5108	21	8	6	1	1	182.068	1500	6.95723	3.32479	4.04111	3.25121	2.2458	2.34129	2.82604	26.7857	26.0678	18.9615	17.8146	15.0513	17.23	226.754	201.08	156.638	141.435	157.215	163.576	149.395	152.443	158.242	159.462	165.121	165.265	164.755	162.792	81.4853	48.658	-36.0383	-45.049	2.64538	76.2361	82.2775	6.6787	17.4346	-1.50638
2698	N#CCCN1CCN(CCC#N)CC1	11	9.89949	85.3622	4.78338	0	4	4	0	0	126.5	572	5.46667	2.8	1.8	4.21667	3.09375	3.91	2.475	19.0667	21.6	11.64	9.525	12.56	10.6	190.192	144.853	106.184	118.56	139.805	169.053	150.666	164.948	167.229	163.971	170.609	175.071	173.946	164.261	20.5333	-52.8711	-45.1333	34.8889	40.0711	-34.6133	-11.1556	5.68889	2.13333	-5.13778
4363	Cc1cc(=O)[nH]c(/C(=N/Nc2ccccc2)C(=O)c2ccc(Cl)cc2)n1	0	20.1152	232.625	6.40494	18	7	4	2	1	211.533	1312	9.11232	5.14773	3.77778	5.15934	4.52159	3.73803	3.26701	32	28.814	23.0353	21.939	21.8977	19.8617	254.222	217.748	219.906	233.95	221.837	160.168	146.839	150.455	158.696	162.605	163.03	159.556	158.192	154.406	41.623	12.4192	8.84949	39.5598	-42.0438	-46.7595	-133.172	-82.5123	5.63177	-3.37359
2564	C=C/C(C)=C/C[C@H]1C(=C)C[C@H]2OC(=O)[C@@]3(C)CCC[C@@]1(C)C23	12	17.2893	331.72	6.59275	0	2	0	2	0	155.292	876	4.56	1.16667	0.846847	3.10583	1.97827	2.33899	1.85511	17.52	20.5385	15.0338	11.2709	9.69444	7.10811	195.469	189.735	123.744	111.507	138.915	161.69	142.503	150.174	151.032	158.708	162.62	167.248	157.969	167.037	63.0768	32.16	-52.0368	-85.0048	-41.6464	0.488	-34.9728	44.1824	20.1808	2.6
999	O=c1c2cc(Br)cc(Br)c2nc(-c2ccccc2)n1/N=C/c1cccc([N+](=O)[O-])c1	19	23.5984	531.415	7.37416	22	9	4	3	2	274.045	3606	11.0508	6.02527	5.4819	6.52489	4.29417	3.47164	3.21437	85.8571	37.9778	35.4348	46.5824	32.8941	31.4773	292.764	254.752	258.537	263.017	255.505	156.241	144.635	146.523	153.18	160.273	159.169	153.562	150.252	150.086	32.2471	26.9744	51.3193	-16.0565	-95.1316	-132.305	-64.5122	11.9913	5.20408	-1.83673
1689	N#Cc1c(-c2ccccc2)nc(SCC(O)CN2CCOCC2)[nH]c1=O	16	19.8964	570.852	7.30264	12	8	4	3	0	228.337	1312	7.87923	3.4881	3.92754	4.96384	3.35593	3.34667	3.43572	28.5217	28.0625	19.8807	18.8739	18.1905	17.1594	227.482	189.863	180.363	173.832	168.227	162.811	147.294	155.573	159.384	162.035	161.192	163.173	161.749	163.226	37.8906	-9.87713	33.3814	102.084	14.2999	-33.7179	-27.8183	-79.1836	6.11153	-1.21928
4370	COc1ccc(C(=O)/C=C/c2ccc3c(c2)OCO3)cc1	0	16.292	229.889	6.17953	12	4	0	4	0	158.667	882	9.31429	5.88372	5.06522	4.53333	3.37286	3.78424	3.57246	25.2	26.9189	20.2353	16.5	20.2791	17.8696	242.872	223.109	162.448	182.594	215.067	156.747	141.779	149.897	149.636	153.438	158.883	158.105	151.747	155.061	36.4473	-22.4939	-69.5902	-56.4286	43.6718	29.7453	-5.89633	-2.08245	6.73469	-3.53061
2860	CCN(CC)CC(=O)Nn1c(S)nnc1-c1ccc(OC)cc1	10.76	17.068	256.301	6.37926	11	8	5	2	0	164.694	1190	7.25701	3.69206	2.07259	3.74304	2.93052	2.89772	2.77564	27.0455	26.0222	20.4111	17.2871	20.6429	18.6133	210.265	189	149.925	155.006	188.535	166.355	151.649	162.591	163.411	161.77	168.17	170.508	161.137	162.981	85.3953	43.8491	1.5274	23.5007	35.6355	-30.9956	-36.6085	-157.76	12.9137	3.5124
1292	Cc1ccc(/C=C(/NC(=O)c2ccccc2)C(=O)NCC(=O)N(C(=O)NC2CCCCC2)C2CCCCC2)cc1	17.6	30.7503	524.546	7.64883	12	8	4	4	0	353.278	1644	6.225	3.45045	2.96721	4.41597	3.44674	3.31394	2.94126	20.55	22.8072	14.4065	14.3073	15.5856	14.0574	207.934	163.981	168.318	182.995	173.201	163.011	146.369	153.195	160.979	164.758	165.862	161.169	160.767	160.898	88.9175	78.125	78.615	62.205	1.36	-103.785	-70.055	8.89	10.4669	-6.00625
1108	CSc1ccc(Cc2nnc3sc(-c4ccc(-c5ccc(Cl)cc5)o4)nn23)cc1	18	23.2822	433.491	7.13658	25	8	4	1	1	132.151	1832	8.55668	5.45486	5.01275	3.00343	2.76654	2.6557	2.51147	41.6364	34.6667	28.1011	23.1319	30.5781	27.7377	278.347	244.177	206.985	228.502	247.223	155.674	143.042	146.743	151.753	154.349	158.21	158.13	153.837	154.736	59.7035	33.2951	-27.8567	16.5686	54.3799	-10.8604	-29.9477	-9.66613	8.80579	-1.95764
1348	Cc1c(C(N)=O)sc2nc(C)n(/N=c3\scc(-c4ccc(Cl)cc4)n3Cc3ccccc3)c(=O)c12	17	27.8291	650.61	7.73067	26	10	5	2	1	246.234	2094	8.55443	4.68689	4.15476	4.47699	3.39652	3.07691	2.83368	38.0727	32.5932	28.7607	26.1231	26.1769	20.6286	264.663	247.512	220.879	225.274	225.56	157.784	144.821	149.715	152.969	154.849	158.627	155.79	154.411	156.752	72.1899	35.7005	-28.7781	-14.112	-74.7568	-12.0661	-89.292	-3.60749	16.554	3.89025
3641	COc1cc2nc(Sc3sc(N)nc3C)n(-c3ccc(C)cc3)c(=O)c2cc1OC	8	23.489	275.129	6.71585	21	9	4	3	0	202.896	1676	8.53778	4.62069	3.61017	4.05791	3.17259	3.22124	3.24579	33.52	31.283	29.6875	26.5179	24.2155	20.5169	246.63	257.999	216.298	229.336	222.802	159.54	145.713	153.446	150.587	152.53	157.312	155.914	154.043	155.041	83.1244	40.3422	-9.35111	7.14222	30.3111	-26.2622	-106.596	-183.253	20.0352	9.8208
2627	COc1ccc(/C=N/n2c(S)nnc2Cn2nc(Cc3ccc(C)cc3)n(CCc3c[nH]c4ccccc34)c2=O)cc1	12	33.2791	904.113	8.24204	31	11	8	2	0	250.61	1922	8.10151	5.02144	4.48864	3.4807	2.99306	3.07718	2.91348	26.6944	27.2208	20.7799	16.9106	21.4737	18.5138	236.633	211.545	176.743	200.585	203.249	161.754	147.888	154.579	156.994	161.357	164.317	161.034	160.089	163.791	107.948	14.593	-116.077	-90.5813	139.04	142.722	-54.2195	-125.844	17.2191	-5.49074
3012	O=C(NC(=S)Nc1ccccc1)c1cn(CCO)c2c(cc(O)c3ncccc32)c1=O	10	24.1557	1182.54	8.20682	20	9	4	4	0	287.458	1518	9.43764	5.5	4.88645	5.86649	3.99365	5.03467	4.20835	30.9796	28.8462	23.3839	24.6379	20.9167	20.4725	251.275	227.559	220.094	192.475	183.686	159.43	147.081	150.421	155.375	157.363	153.88	160.043	162.176	162.148	31.4491	10.2919	45.4927	8.20718	-44.015	-59.7585	-32.9973	-35.1727	11.0779	5.48688
813	Cc1nnc2n(c1=O)NP(C)(=O)NN2	20	11.0219	56.9909	4.37936	6	9	6	2	0	164.181	836	10.6656	0	0	7.13828	4.1193	2.86842	1	36.3478	39.75	26.38	21.7917	5.84211	1	212.469	185.701	168.761	135.504	87.5919	175.937	164.013	169.96	178.443	180.145	167.478	172.313	177.264	184.918	38.5652	76.9296	-57.6059	-90.1647	-27.5913	-47.4326	-18.0656	65.0631	5.52741	-2.89792
4500	COc1ccc(N(CC(=O)NCCCSc2ccccc2)C(=O)CCSC2=C(C)C(=O)c3ccccc3C2=O)cc1	0	31.3361	44928.6	12.1238	18	9	2	5	0	355.396	2114	7.40944	3.5407	4.0766	4.86843	2.80744	3.05416	3.22424	28.9589	27.8816	22.1098	20.8713	17.4244	18.1739	237.114	212.054	179.519	165.422	168.611	158.071	142.453	149.777	153.846	154.077	156.778	159.806	161.231	157.675	84.6526	42.8745	-37.0233	-133.089	-50.7194	-54.9754	44.4532	69.7868	15.7915	0.391443
194	O=C(Nc1ncc(-c2ccc(Cl)cc2)[nH]1)c1c[nH]cc1-c1ccccc1	28	20.5631	206.796	6.28725	22	6	4	1	1	163.783	1284	8.42939	4.77612	4.79142	3.99471	3.24537	3.19692	3.1945	31.3171	28.7045	21.1477	21.0233	20.4627	19.4035	259.273	219.191	195.644	188.996	194.489	158.737	146.548	148.709	154.315	157.432	160.693	164.116	163.137	159.602	21.7939	-8.78276	-16.794	21.7547	-17.0938	-17.3332	-16.0696	-29.4965	5.65675	-4.6514
170	Cc1c(-n2c(Cc3ccc(Cl)cc3)nn(CC3=NN4CC5NNC(=S)N5N=C4N3)c2=O)c(=O)n(-c2ccccc2)n1C	28	34.0717	713.152	8.00478	22	16	12	2	1	279.325	2222	9.34402	5.32266	5.41226	4.16902	3.23829	3.25757	3.24196	33.1642	30.3562	24.6203	21.6221	20.3277	20.6995	242.415	217.916	200.93	200.504	194.575	165.685	154.376	160.961	164.485	163.474	165.118	163.142	163.133	163.927	109.41	56.281	-62.5635	-45.5803	11.3471	-132.134	-46.4931	25.8233	18.2408	2.17643
2150	COc1cc2nc(Sc3cnc(N)s3)n(-c3ccccc3)c(=O)c2cc1OC	14	21.8964	266.395	6.6146	21	9	4	3	0	193.34	1600	9.33838	4.72607	4.14652	4.3941	3.39394	3.23778	3.20632	36.3636	33.234	29.9405	29.7692	23.505	21.8571	258.185	257.71	228.69	238.992	213.248	158.722	145.888	152.46	150.908	152.755	156.352	151.56	156.69	155.506	51.7041	16.7587	14.7346	-36.8666	6.25574	-34.747	-72.7284	-92.7555	14.8822	9.01033
1142	CSCCSc1nc(-c2ccccc2)c(C#N)c(=O)[nH]1	18	14.8373	210.295	6.04166	12	6	3	1	0	162.729	1240	7.6633	2.08497	1.05797	4.93118	3.6816	3.32758	2.58756	37.5758	32.8529	26.6094	25.7143	21.2941	16.1957	256.764	228.432	216.984	216.835	190.108	157.966	143.18	148.019	151.791	159.162	156.832	154.597	159.762	158.639	49.3405	80.4534	78.3696	41.7597	-18.5239	-110.142	-121.403	-55.4627	7.44444	4.77778
3224	COc1ccc(-c2nnc(CSc3cc(C)nc(SCc4nnc(-c5ccc(OC)cc5)s4)n3)s2)cc1	10	29.0199	298.245	7.00625	28	12	6	2	0	185.236	2368	8.33522	4.82728	4.25	3.13959	2.57816	2.39317	2.55446	40.1356	35.0794	32.0092	28.5462	31.8218	26.6875	263.585	250.855	205.601	220.562	220.64	157.724	143.749	150.283	150.484	154.559	156.92	155.359	155.102	156.384	82.1983	-17.6048	-109.917	-120.38	38.3026	60.205	120.918	-7.97191	13.31	0.844872
1357	O=C(/C=C/c1ccco1)c1cc(Cl)c[nH]1	17	11.492	79.9167	4.78645	10	4	1	2	1	116.422	870	9.37413	4.91414	2.45	5.06182	3.67557	3.5116	2.51173	37.8261	30.7917	22	21	23.5909	23	264.671	197.248	202.09	204.566	211.965	157.582	144.617	147.865	158.361	157.334	157.698	158.181	159.344	157.91	11.8197	-18.3674	-36.0269	-8.41574	17.0592	15.9351	-34.788	-25.3356	1.15501	-4.74291
1415	O=C(c1ccncc1)N(/N=C/c1c[nH]nc1-c1ccc(Cl)cc1)C(=O)c1ccc(F)cc1	17	24.9437	256.842	6.71161	23	9	5	2	2	297.061	1586	10.8001	7.42354	6.36166	6.32044	4.63197	4.35723	4.02469	33.7447	30.54	24.7449	23.9167	24.9703	22.5196	266.756	232.088	229.117	234.474	230.359	161.465	146.956	150.695	156.759	162.214	161.875	157.807	157.43	154.532	33.5491	-10.863	-2.2692	-36.7824	-46.8772	-17.4692	14.8601	4.17292	5.93979	-6.84201
2831	Clc1cc(Cl)c(Cl)c(/C=N/Nc2nc(-c3cccnc3)cs2)c1	11	17.8845	131.18	5.70948	17	8	4	0	3	99.5471	1868	8.66435	5.34113	5.4018	3.11085	2.76422	2.71312	2.7136	58.375	38.8824	37.3934	36.4737	37.7368	48.7273	303.577	261.28	231.103	239.631	249.634	156.967	145.162	148.621	154.145	160.035	160.892	158.302	159.315	150.994	12.4661	-32.8802	-18.7019	-3.43977	3.00728	-9.74002	6.1114	-9.87225	2.23633	-5.32422
1660	CSc1ccc(C2CC(c3ccc(Cl)cc3Cl)=NN2c2nc(-c3ccc([N+](=O)[O-])cc3)cs2)cc1	16	27.7316	457.975	7.37958	23	10	4	2	2	244.045	2332	8.68111	5.66949	4.21102	4.60463	2.46609	3.09112	2.65635	44	34.614	27.547	27.824	33.6571	27.8487	278.396	245.829	207.39	230.34	265.386	155.948	142.929	146.145	152.032	154.29	158.03	154.654	149.979	150.941	57.0584	34.1021	-49.1833	-50.4118	21.8635	26.6144	-20.7226	-58.0839	9.6707	-4.44607
2879	COc1ccc(C2=NN(C(=O)COc3ccc(C)cc3)C(O)(c3cc(F)c(Cl)cc3Cl)C2)cc1	10	26.5838	856.473	7.9766	18	9	2	4	3	292.962	1934	9.25836	6.28712	5.03289	5.32658	3.91507	4.18827	3.58909	35.1636	29.5345	26.4016	24.694	26.8496	22.744	250.507	231.729	187.38	202.756	230.233	161.042	144.848	151.661	156.414	157.752	162.167	163.106	155.967	158.587	69.4355	-0.379912	-78.5886	14.5867	98.5185	-18.7175	-40.5791	-24.9895	13.9504	-4.05785
1166	O=C1CCN(C(=O)c2cc(-c3ccc(Cl)cc3)n(-c3ccc(F)cc3)n2)CC1	18	22.1557	259.089	6.58679	17	7	3	2	2	265.033	1418	9.369	5.14548	4.12269	5.88962	3.86134	3.61376	3.27619	31.5111	28.6458	21.0463	19.581	22.0412	19.7188	250.356	206.806	211.588	219.897	211.81	161.836	145.439	152.113	160.12	161.753	158.892	156.878	157.957	155.953	53.7487	8.76063	-48.0037	-55.0057	-16.7268	-28.2229	-65.6955	-61.5605	6.06815	-5.12247
2249	NC(CCC(=O)n1c(-c2ccc(O)cc2)nc2ccccc2c1=O)C(=O)O	13	20.8794	354.948	6.86522	16	8	3	5	0	325.5	1168	9.86364	5.0099	4.87255	7.39773	5.14539	3.9659	4.83115	26.5455	27.1304	21.0291	20.1048	18.3069	16.7647	236.071	206.9	207.24	217.748	194.574	161.674	147.548	150.456	158.484	163.538	160.337	155.523	156.086	160.134	39.5372	47.4628	-1.7438	-57.9339	-75.9008	-114.298	-52.4628	81.2149	9.19731	-1.56663
3258	Cn1cc(CCC(=O)NCc2c[nH]c3ccc(Cl)cc23)c2cc(Cl)ccc21	10	21.4486	466.591	7.1387	18	6	3	1	2	155.872	1564	7.0263	3.31139	3.3662	3.38852	2.69943	2.84813	3.01017	34	28.2041	20.7757	17.7368	17.5926	20.6338	248.668	215.011	168.485	161.769	174.716	159.383	145.413	151.215	153.455	158.266	160.343	163.345	161.647	162.089	45.2261	-10.3645	-92.3468	-94.34	26.7003	81.6418	-2.14992	-54.0656	9.04395	-3.44329
3451	COc1ccc2[nH]cc(CCNc3nc(Nc4ccc(C#N)cc4)nc(Oc4cc(=O)n(C)c5ccccc45)n3)c2c1	9	33.2102	1058.05	8.39927	31	11	8	3	0	292.111	1726	9.29412	6.38129	6.16438	4.29575	3.38372	3.33873	3.33333	25.3824	27.4932	21.2533	19.3602	20.7914	20.1644	243.131	222.163	181.257	194.691	205.038	161.541	147.899	154.672	155.555	159.036	163.705	163.694	163.536	163.151	91.3737	49.6159	-53.7889	-54.8374	-7.48789	-51.5744	-44.6817	30.3945	15.4533	0.0553633
2841	O=C(NN1C(=O)c2ccccc2C1=O)c1ccc(-n2c(-c3ccccc3)nc3c(Br)cc(Br)cc3c2=O)cc1	11	31.2433	475.617	7.52559	28	10	4	4	2	336.407	3962	10.8024	5.36897	4.90756	6.11648	3.78529	3.53715	3.49215	72.0364	35.6333	33.0234	40.4385	30.0455	29.288	291.363	257.7	251.557	258.873	239.63	154.575	142.857	146.035	151.639	156.829	156.131	149.787	149.495	154.192	44.1075	41.2895	59.3598	-52.6851	-115.516	-143.537	-83.4913	43.4655	10.5504	-0.700165
4338	Cc1cc(=O)[nH]c(/C(=N/Nc2ccc(Cl)cc2)C(=O)c2ccc(Cl)cc2)n1	0	20.9317	238.023	6.46562	18	8	4	2	2	211.122	1600	9.2978	5.27399	4.0461	5.14931	4.53233	3.73195	3.22903	39.0244	31.0465	25.6706	23.5	22.9886	21.9043	265.755	228.132	223.463	238.59	225.783	159.759	146.674	150.246	158.327	162.309	162.906	159.326	158.111	154.255	39.8392	7.46964	1.38334	37.5291	-43.9645	-48.1644	-130.754	-69.0348	4.77751	-5.22308
2185	OCC1CCC(c2ccc3c(c2)CCC3)=NO1	13.66	13.3541	105.599	5.19028	6	3	1	2	0	112.639	698	6.17647	1.95833	1.22917	3.31291	2.16444	2.39005	2.17535	20.5294	23.2778	14.1573	12.8	12.5833	8.72917	209.816	166.364	141.39	161.83	151.38	161.79	144.593	150.383	159.323	161.707	162.972	159.398	160.195	166.206	37.6021	1.80969	-28.8547	-40.1522	-6.35294	-15.3599	-34.3737	-10.0796	6.11592	-2.46886
3448	Cc1ccc2[nH]c(-c3ccccc3)c(C3C=C(c4ccccc4)Oc4[nH]nc(N)c43)c2c1	9	26.0178	367.983	7.07119	26	5	4	1	0	164.083	1254	7.66667	4.24713	3.11377	3.03858	2.82838	2.76022	2.75549	23.2222	26.0169	20.1111	18.7214	17.2586	15.1737	246.453	229.212	220.894	224.932	199.539	157.816	145.085	146.153	150.517	154.722	153.376	152.388	155.94	158.816	57.4348	32.0933	-14.8272	-10.5652	17.3196	-8.39781	-97.0823	-157.454	15.6914	5.28395
2121	O=[N+]([O-])c1ccc(C2=NN=C3C(Cc4ccccc4)=Nc4ccccc4N3C2)cc1	14	24.0178	401.624	7.09413	18	7	5	2	0	242.5	1218	9.65957	5.59184	4.56311	5.15957	2.8603	3.30612	3.30205	25.9149	27.9804	21.2364	19.0259	20.3265	16.9223	253.589	224.817	202.101	212.115	224.275	159.297	145.798	148.813	155.385	159.813	160.61	158.779	155.318	156.086	49.0973	16.5545	-14.5894	-61.1987	-24.4215	-10.6799	-70.3069	-41.2757	7.97646	-3.23902
2273	Cc1c(-c2nnc(-c3ccccc3)o2)sc2ncnc(N3CCCCC3)c12	13	21.7466	324.883	6.77672	20	7	5	1	0	133.142	1304	7.92271	3.49291	3.275	2.8944	2.6302	2.23473	2.39653	28.3478	28.82	21.7778	21.3153	17.8617	16.4625	241.101	206.688	206.611	202.738	180.83	160.833	145.78	153.725	156.203	160.22	162.484	156.753	158.611	159.898	78.7738	86.9072	72.728	0.453266	-120.008	-55.6076	26.8893	-36.4953	12.8157	9.01843
1912	CC(CNC12CC3CC(CC(C3)C1)C2)C(=O)c1ccccc1	15	17.8156	569.414	7.13307	6	2	1	1	0	136.229	860	4.28571	1.65517	1.8	2.78019	1.88211	2.04885	2.21111	17.551	20.9038	12.1274	8.87861	9.93103	11.5889	199.374	158.366	136.277	133.56	131.285	161.742	143.249	149.528	157.333	166.227	162.435	161.716	164.395	157.785	36.1179	-7.4823	-29.1445	-19.1554	-10.2416	25.4244	8.50312	-18.8313	7.69388	-8.40816
3812	Cn1c(=O)cc(Oc2nc(NCCCl)nc(Nc3ccc(C#N)cc3)n2)c2ccccc21	7	24.8058	771.963	7.81209	22	10	7	2	1	236.311	1570	9.5921	6.5233	5.88889	4.72622	3.80946	3.53883	3.57787	31.4	29.3585	22.9159	22.1481	25.2688	22.567	250.337	221.424	202.482	212.89	220.188	162.715	149.019	156.91	158.488	161.008	164.174	163.611	163.542	161.466	71.9348	78.2869	6.91951	-26.9664	-65.7679	-54.2168	-98.2726	-64.4114	9.2528	2.7136
3370	O=C(c1cccnc1Nc1nc2c([N+](=O)[O-])cccc2s1)N1CCNC(Cl)C1Cl	9	22.8508	238.67	6.53979	15	12	6	3	2	268.82	1946	10.178	5.23385	5.39981	6.25162	3.42945	3.0222	3.31047	45.2558	35.087	30.82	29.3636	25.7674	28.1154	263.924	228.191	227.896	225.206	210.279	163.065	150.425	155.947	160.203	162.586	160.027	161.6	161.719	160.178	36.6619	30.6802	51.1002	-5.13398	-57.3063	-57.4886	9.52311	39.7072	5.56896	0.374256
3951	COc1ccccc1NS(=O)(=O)c1ccc(NC(=O)c2cn(CCO)c3c(cc(Cl)c4ncccc43)c2=O)cc1	5	31.3331	3054.36	9.41062	26	12	4	6	1	388.499	2156	9.61983	4.64052	4.78036	6.16665	3.94419	4.26313	4.01971	34.2222	33.1343	26.4514	25.7949	20.732	19.9302	253.107	237.128	213.737	198.46	186.762	159.31	144.94	151.067	154.091	156.558	155.999	157.879	161.1	159.244	27.4459	38.2751	11.2979	-54.4819	-41.7221	-40.1756	-139.26	9.13192	14.8934	5.14966
3357	c1ccc(-c2cn3nc(Cc4noc5ccccc45)sc3n2)cc1	9	19.6372	195.523	6.15115	23	6	4	1	0	117.365	1176	9.51235	6.51163	5.7027	3.26013	2.75034	2.93583	2.81582	32.6667	32.025	23.5263	22.2958	25.907	20.6757	271.743	229.675	218.835	223.02	236.851	156.64	144.269	147.232	154.15	157.63	159.645	158.676	156.392	152.661	39.5775	0.257888	-22.5953	-57.8573	-9.60357	36.6543	-5.2332	-32.7723	5.82716	-0.419753
4432	CCOC(=O)C1C(=O)C=C(c2ccccc2)CC1c1ccccc1	0	18.4014	194.972	6.14833	12	3	0	3	0	200.194	968	7.13636	2.88889	2	4.54987	3.29454	3.15123	2.67935	22	24	16.8879	17.6455	13.8981	11.6957	231.016	199.935	188.216	181.867	166.245	157.213	140.55	146.705	152.906	153.061	155.564	155.715	157.711	159.231	41.719	1.55992	-19.1921	10.8182	-22.6426	-43.1612	-63.9463	-53.6983	8.99174	2.08264
3169	N=C(N)c1ccc(-c2ccc(-c3ccco3)o2)cc1	10	14.9467	114.622	5.3835	16	4	2	2	0	130.167	778	8.83871	5.79412	3.80556	4.19892	2.45531	3.83497	3.3642	25.0968	27	19.7049	18.8833	21	16.2222	246.618	212.88	174.867	172.738	214.647	158.526	145.868	146.149	154.35	155.898	159.245	157.429	155.048	158.604	25.1977	0.912591	-47.7118	-36.8751	-9.7461	37.9022	-11.2518	-47.5057	6.45578	-4.31322
3981	N#Cc1c(-c2ccc(Cl)cc2)csc1N	5	11.4112	74.2309	4.71265	11	4	2	0	1	101.37	1046	8.00224	2.15226	0.777778	4.60772	3.6252	3.13842	2.59877	47.5455	35.5652	28.4762	25.9024	35.1667	31.75	293.802	260.063	205.257	202.802	176.152	153.96	141.838	140.437	146.816	151.287	156.011	159.122	170.709	177.858	8.99704	-1.9498	-2.65514	-24.2526	-10.1963	-20.4552	3.19702	6.35568	4.86983	-2.60124
1665	O=C(CCc1c[nH]c2ccc(Cl)cc12)NCc1c[nH]c2ccc(OC(F)(F)F)cc12	16	23.8683	283.063	6.74428	18	9	3	2	4	356.123	1580	10.8852	5.80857	4.57046	7.57709	3.98908	4.40098	4.41708	33.617	29.7	20.7547	19.2946	21.5783	19.4878	247.236	212.938	168.727	181.516	188.363	167.867	148.982	157.305	155.531	160.542	167.445	166.705	166.149	174.596	43.9112	77.1906	-65.2862	-35.4272	64.7382	45.9949	-5.32492	-97.1036	1.78135	-2.11
4492	O=C1CC(CBr)N1OS(=O)(=O)c1cccs1	0	12.3056	80.0459	4.8526	5	8	1	4	1	196.742	2338	10.2482	2.34425	0.0676329	8.1976	4.11221	2.86201	2.05757	97.4167	53.36	42.6087	44.075	44.4231	23.8696	276.777	209.875	239.172	235.618	212.614	158.374	142.823	152.304	160.944	159.479	159.237	155.896	147.707	162.785	-3.54286	68.5285	1.79948	-10.4498	-53.567	-117.197	-2.0808	5.05886	1.8125	-2.375
1347	CN1C(N2CCN(Cc3ccc([N+](=O)[O-])o3)CC2)=NS(=O)(=O)c2ccccc21	17	22.3025	698.754	7.57892	11	11	5	5	0	319.272	1452	9.8818	3.06032	3.65833	6.79301	3.20586	2.86812	3.28638	30.8936	33.6	22.9823	19.7769	14.1143	16.3875	227.355	203.279	169.186	148.873	144.31	165.101	149.661	160.912	159.618	164.297	163.802	164.195	168.316	165.022	39.5659	62.0025	-0.184498	-12.368	-67.1807	-136.68	-12.346	-9.85111	9.03803	0.255772
2592	Cc1cccc2cc3c(=O)[nH]c(=S)[nH]c3nc12	12	13.6014	85.7806	4.98242	14	5	3	1	0	120.625	908	9.32479	1.95402	0.105263	4.63942	2.91537	3.02682	2.88109	34.9231	30.2857	25.4211	23.3158	20.8276	13.4737	265.58	244.258	196.359	181.875	172.362	158.165	146.922	150.006	151.475	160.177	155.465	161.99	159.938	167.451	32.8889	22.3333	-11.2222	-38	-19.3333	-11.7778	-28.1111	-22.8889	6.18935	-0.37574
2241	CCOC(=O)c1sc(NC(=O)c2cc(OC)c(OC)c(OC)c2)nc1C	13	19.2179	187.506	6.18932	11	9	2	6	0	237.92	1370	9.31401	3.44872	3.96624	5.17218	3.26123	3.50059	2.89627	29.7826	28.8723	28.3544	25.9	15.9712	18.0759	221.809	234.021	185.889	175.203	142.959	162.965	147.3	159.595	154.83	153.925	161.53	158.155	168.515	164.969	95.9647	53.4699	-8.68137	-71.2917	-151.242	-42.7026	47.9727	73.7438	18.327	11.7694
424	N#Cc1ccc(Nc2nc(Oc3ncnc4ccccc34)nc(N3CCN(c4cccc(Cl)c4Cl)CC3)n2)cc1C(F)(F)F	24	34.9991	381.599	7.42597	28	15	9	1	5	417.268	2390	11.5502	8.14286	7.99158	6.51981	3.49063	4.02619	3.67338	37.3438	32.0145	27.473	24.6962	25.0902	26.3258	263.265	233.851	203.406	205.418	217.089	167.328	149.566	160.743	159.2	164.863	168.669	167.735	167.946	161.382	73.8476	99.7762	32.4474	-1.41727	-7.50807	-69.2007	27.7577	-27.6836	6.43457	-1.69238
2104	CNc1nc(Nc2ccc(C#N)cc2)nc(Oc2cc(=O)n(C)c3ccccc23)n1	14	23.3915	628.541	7.54201	22	9	7	2	0	233	1244	10.0426	6.7381	5.93182	4.95745	3.91358	3.57937	3.80556	26.4681	28.24	22.9184	21.4608	22.2262	20.7045	245.92	228.583	197.927	204.063	217.069	162.891	149.442	157.524	156.533	161.357	162.863	165.577	161.659	162.691	71.7773	64.2096	-21.2331	-49.8067	-49.584	-55.0009	-57.981	-66.3205	11.4409	2.0842
3722	CC(C)C1=C(O)C(=O)C2=C(C=CC3(O)C(C)(C)CCC[C@]23C)C1=O	7	19.0332	161.932	5.96265	0	4	0	4	0	253.882	1002	6.2	1.15054	0.4	5.07764	3.18868	3.27599	2.8402	20.04	22	18.8897	14.2426	12.2473	8.97647	202.882	211.65	138.214	119.898	146.287	161.711	143.234	149.58	149.8	158.181	161.654	167.291	160.669	162.983	92.9872	120.333	65.992	-80.7328	-110.766	-87.7376	-195.515	-128.864	27.4272	4.9328
3186	FC(F)(F)c1cc(N/N=C/c2cocc2Br)c2cccc(C(F)(F)F)c2n1	10	21.284	457.321	7.11864	15	11	3	1	7	480.203	2506	17.2305	13.8279	8.27344	13.7201	7.16553	14.3408	4.97032	71.6	38.8108	38.3333	31.16	37.8462	37.2128	278.198	258.581	232.94	220.996	212.821	179.66	152.814	167.605	161.7	174.898	174.057	178.791	195.629	164.531	19.7764	57.118	22.2154	-6.60905	-7.1701	-22.2579	5.94787	-50.3251	-2.00245	-0.844898
814	O=C(Cn1cc(CC(O)c2ccc(S(=O)(=O)c3ccccc3)cc2)nn1)c1ccccc1	20	25.0813	817.056	7.86886	23	8	3	4	0	309.049	1544	8.61216	4.34667	4.23643	5.83112	2.84264	3.76512	3.62608	29.1321	31.4286	21.5366	19.0846	17.87	18.2674	245.461	210.417	185.028	187.424	181.285	158.664	143.327	147.877	153.664	159.174	160.855	158.953	161.323	159.199	6.96072	-7.74174	-19.7341	-34.4861	-9.07694	-17.1609	-35.498	-51.648	6.46671	-10.2677
1576	O=C1O[C@@H](CNS(=O)(=O)c2ccc(C(F)(F)F)cc2)CN1c1ccc(N2CCNCC2)c(F)c1	16	26.8913	313.435	6.97137	12	13	4	4	4	519.362	1810	11.2579	7.91176	4.9319	9.27432	4.09842	7.36524	3.85308	32.3214	33.0169	21.3546	19.8725	23.5392	21.4516	227.169	193.716	168.777	169.608	176.8	172.128	150.514	163.095	163	166.827	168.387	167.605	172.846	164.808	38.3724	120.93	12.3067	-123.66	-78.7937	5.24206	162.409	-65.6287	4.10204	-5.91837
1133	COc1ccc(F)cc1-c1cccc(-c2nn(CCOS(=O)(=O)c3ccc(F)c(Cl)c3)c(=O)o2)c1	18	27.3616	381.535	7.19697	23	12	2	6	3	419.944	2034	12.0009	6.97452	6.8321	8.07584	4.87389	4.82314	4.22051	39.1154	36.5636	28.7	25.9573	21.9817	24.0111	259.791	237.981	209.888	201.219	185.057	163.032	144.842	153.827	156.33	159.343	159.429	160.428	165.065	165.162	32.8858	54.1985	-45.6548	-176.031	-82.4509	61.2427	114.757	15.2869	7.42271	-2.87019
2451	O=C(CSc1nnc(Cn2cnc3ccccc32)o1)Nc1nc2ccccc2s1	12	23.3226	448.49	7.1706	23	10	6	2	0	185.062	1632	10.0207	5.52222	5.6	4.30378	3.62336	3.35041	3.15634	37.9535	34.6383	26.931	23.9884	29.75	28.2	269.028	227.706	210.763	222.44	221.335	159.324	146.84	151.835	156.593	160.207	161.422	159.455	159.865	158.432	42.837	-8.41945	-86.5446	-42.6176	43.1466	22.4157	-32.0828	-16.0135	4.58951	-1.9854
2821	Cc1nnc2c(Cc3ccccc3)nc3ccccc3n12	11	16.8778	218.659	6.12945	19	4	4	0	0	103.917	822	8.05714	2.90909	2.20408	2.96905	2.71596	2.37121	2.38095	23.4857	26.3947	20.1169	18.2	13.4697	12.8367	245.949	220.545	205.258	188.438	168.671	159.695	145.507	150.635	157.629	159.601	157.011	160.553	161.955	155.603	53.8678	32.9943	-17.4514	-39.4694	-59.6465	-55.5869	-22.5094	-36.6171	9.67102	3.66286
2058	O=C(NO)n1c(/C=C/c2ccccc2)nc2sc3c(c2c1=O)CCCC3	14	20.4418	513.485	7.19673	15	7	3	3	0	229.892	1296	8.61499	4.85232	3.64286	5.34633	3.76724	3.70699	3.72961	30.1395	29.3261	22.2621	23.56	23.2025	18.8452	245.375	213.507	203.842	212.661	215.58	159.305	145.257	149.283	154.794	156.233	159.313	160.543	155.463	158.849	46.3331	58.725	106.344	62.8094	-41.176	-143.427	-117.538	-106.281	10.5452	7.36019
2096	N#Cc1ccc(Nc2nc(Nc3cc[nH]n3)nc(Nc3cc[nH]n3)n2)cn1	14	21.2132	221.423	6.39333	22	12	12	0	0	186.944	1140	11.4359	7.91429	6.35135	4.79345	3.92308	3.88413	3.4955	29.2308	30.881	22.1892	23.7794	24.2857	20.0541	247.321	203.611	217.015	231.424	215.784	170.662	160.314	163.876	170.129	169.786	173.565	166.889	170.053	169.06	24.6982	-4.66864	-39.5976	23.7751	-14.8166	-37.0769	-72.2722	-20.3669	2.22485	-3.40828
3800	O=C(NCC(=O)N1c2ccccc2Sc2ccccc21)NN1C(=O)C(Cl)C1c1ccccc1Cl	7	26.9722	567.004	7.56414	18	10	4	3	2	268.347	2104	8.95489	4.55752	5.43223	5.16053	3.56033	3.4238	3.97876	40.4615	32.625	28.2397	27.2066	19.7434	22.2637	268.29	234.545	224.575	195.25	174.42	158.01	145.368	149.879	156.303	155.818	157.046	158.994	162.676	164.644	35.1425	-3.35539	-26.8755	-31.96	-2.74417	-60.9047	32.2981	41.1481	9.53254	-1.3284
3340	Cc1nn(C(=O)c2ccc(Cl)cc2)c2c1nnc1cc(Cl)c(F)cc12	9.1	20.0224	241.137	6.40166	19	8	4	1	3	212.399	1540	11.8003	5.42115	3.40801	6.24704	4.81201	4.12226	3.13978	45.2941	34.5946	32.8904	29	26.9839	23.082	289.829	265.22	254.764	253.025	231.146	161.472	146.377	150.107	158.067	163.366	161.493	156.819	154.471	163.745	48.7014	36.9771	-9.31757	-45.5499	-45.8909	-70.6222	-27.8959	-6.235	7.69983	-0.415225
1473	Cc1ccc(OCc2ccccc2-c2nnc(-c3ccccc3F)o2)cc1	16	21.2702	350.974	6.85396	23	5	2	2	1	199.972	1116	9.36364	5.81429	4.52326	4.54482	3.10642	3.14365	3.12274	25.3636	27.0851	20.7065	19.1031	20.8857	17.6279	248.687	218.493	188.609	224.017	238.863	159.773	143.419	148.821	153.024	161.28	165.207	156.324	147.968	156.564	56.9504	28.4711	8.02479	29.3058	1.36364	-73.0826	-24.6116	-21.3306	8.4375	-2.25
4024	Cc1ccc(NC(=O)c2cn(CCO)c3c(cc(Cl)c4ncccc43)c2=O)cc1	5	22.7415	509.236	7.29762	20	7	3	3	1	245.339	1438	8.80011	4.80503	3.94253	5.21997	3.91485	4.43402	3.54302	30.5957	28.14	23.8056	22.9052	20.6981	18.6897	250.212	232.583	214.872	201.486	183.107	159.069	144.943	150.406	153.959	157.213	154.765	158.626	162.055	160.732	48.9147	24.8454	27.4076	31.2361	-33.8857	-80.2451	-35.2012	-78.2706	12.7913	5.45315
1374	Cn1c(=O)c(C#N)c(-c2ccccc2)n2c(CC#N)nnc12	17	16.8658	173.943	5.94719	15	7	6	1	0	212.417	908	11.375	3.64062	2.5641	6.63802	4.75235	4.39844	5.08974	28.375	29.6765	25.7761	25.2162	14.7812	10.7692	260.621	249.553	242.535	210.993	157.51	162.624	148.645	155.537	156.431	161.355	156.044	160.827	166.647	174.2	52.5078	42.3086	2.48047	-32.0234	-66.5938	-105.566	-38.4375	18.8711	11.5078	6.55859
1639	CC1NN(c2ccccc2)C(=O)C1C(=O)CN1CCCCC1	16	17.0965	225.522	6.20688	6	5	3	2	0	184.639	910	6.08889	1.85149	1.3125	4.10309	2.76936	2.72772	2.24045	20.2222	22.8936	14.5868	13.7016	12.0891	9.33333	201.721	162.007	156.048	161.358	144.156	164.739	148.258	156.913	163.001	165.594	165.012	160.936	163.515	169.274	52.72	23.32	34.16	30.24	-72.08	-56.16	-85.64	-28.24	8.84543	-0.201481
2529	COc1ccc(C2SCC(=O)N2c2ccc(Nc3nc(Oc4ccc5c(C)cc(=O)oc5c4)nc(N(C)C)n3)cc2)cc1OC	12	35.5788	1240.27	8.62716	28	13	6	6	0	325.587	2116	9.31259	5.31936	5.20654	4.34116	3.16161	3.03876	3.26708	28.2133	28.8125	24.7308	21.2011	19.7904	19.7423	237.867	236.062	196.131	186.527	192.759	161.232	146.74	156.557	152.863	158.519	158.209	161.776	161.581	157.267	139.194	84.4622	-72.8091	-62.8701	-155.088	-13.994	26.1923	-19.5829	22.6889	5.79556
3870	O=C1C(Cl)C(c2ccccc2[N+](=O)[O-])N1c1ccc(-n2c(Cc3ccccc3Nc3c(Cl)cccc3Cl)nc3ccc(Br)cc3c2=O)cc1	6	39.1189	2391.44	9.36889	34	13	5	4	4	386.066	3912	9.58169	5.68724	5.17029	5.36203	3.32978	3.59873	3.13327	54.3333	33.6026	29.3567	28.1739	25.0707	24.2732	281.375	248.478	232.108	236.002	226.417	156.385	143.651	146.604	153.761	155.313	156.096	153.937	153.539	155.79	56.7137	18.4148	-24.1345	-51.0022	-83.318	-79.7993	48.347	-6.67303	12.5567	-5.20679
1811	COc1ccc(F)cc1-c1cccc(-c2nnc(SCCCCF)o2)c1	15	19.7871	526.085	7.22097	17	7	2	2	2	249.365	1346	9.37374	5.41126	5.44103	5.66738	3.3549	3.93575	3.85594	30.5909	29.2391	21.5495	20.6413	20.5065	20.9538	238.105	208.695	199.571	195.979	183.857	164.669	145.42	153.854	157.122	159.638	160.513	160.5	166.733	163.476	63.551	38.6566	14.1901	-43.3223	-60.5445	-61.2332	-27.2626	19.8558	8.70248	5.75
8	CC1=NNC(=O)C1CN1C(=O)C(=O)NC2CCCCC21	39	15.7513	112.127	5.41278	0	7	4	3	0	222.194	874	7.94737	3.15789	0.551724	5.84722	4.36176	4.44189	2.84339	23	24.825	16.3981	13.5565	14.9868	7.82759	202.307	166.489	148.617	165.209	139.992	167.846	151.421	157.989	164.405	166.984	167.372	164.046	169.756	176.431	58.1274	47.3158	9.24931	-48.4626	-23.7839	-21.4792	-78.3158	-93.2521	8.1662	-3
2986	Nc1nc(COC(=O)c2ccccc2)cs1	10	12.1992	73.4244	4.76626	11	5	2	2	0	134.031	888	8.78632	4.21429	2.59259	5.15505	3.08515	3.4795	2.84774	34.1538	31.4074	21.0851	19.3556	22.7857	20.2222	249.45	201.607	197.141	187.068	209.854	159.409	146.138	150.031	156.216	160.099	160.724	160.182	156.267	158.143	17.6305	-1.61275	-13.7166	-39.7554	1.78961	-9.86193	-6.90138	-25.5062	2.94083	-3.17751
3616	COc1ccc(C2C3=C(N=c4s/c(=C\c5c(C)[nH]c6ccccc56)c(=O)n42)c2ccc(OC)cc2CC3)cc1	8	31.5533	578.162	7.72083	26	7	3	3	0	225.337	1774	7.97643	4.86078	5.15033	3.41419	2.784	2.88662	2.99849	26.8788	27.8472	23.0909	20.1722	19.4529	20.2026	247.995	242.565	210.418	205.548	202.981	156.782	142.432	148.849	148.899	152.634	153.775	153.604	155.569	155.813	89.8919	23.7512	-56.4388	-82.6556	14.8944	62.3456	3.10244	-52.2755	23.7645	9.95041
766	O=C(NS(=O)(=O)c1c(-c2ccccc2)noc1-c1ccccc1)c1ccc(Cl)s1	21	22.9002	314.475	6.81561	22	9	2	4	1	260.058	1888	10.0594	5.53457	4.53662	6.19186	5.2457	4.26103	3.46091	44.9524	39.8444	31.1461	34.0114	28.1889	23.2386	283.908	241.835	257.435	247.017	236.916	154.45	140.704	144.21	150.667	156.535	153.467	155.045	153.478	152.663	-0.216595	42.4554	8.6443	111.424	-45.6088	-68.302	-141.131	-94.6797	4.75	3.16667
93	Cc1cc(SCc2nnc(-c3ccc([N+](=O)[O-])cc3)n2N)nc(SCc2nnc(-c3ccc([N+](=O)[O-])cc3)n2N)n1	31	32.262	375.429	7.33906	28	18	12	4	0	421.451	2204	11.2605	6.51852	6.65476	6.90904	3.36034	3.52851	4.78461	36.1311	33.8462	28.7561	26.617	25.1587	28.5893	251.499	238.174	199.481	211.083	190.879	165.672	154.525	155.057	158.706	165.075	163.899	161.314	166.377	165.163	89.0506	72.611	-144.787	-248.21	-1.85542	105.244	230.646	-10.7067	12.6794	-6.22118
1697	CCCCCCCCCCn1cc(Cn2c(CC)nc3nc(C(F)(F)F)ccc3c2=O)nn1	16	25.1115	18504.8	11.0197	15	10	6	1	3	378.979	1460	8.09375	4.01418	2.37778	5.92155	2.89556	3.79541	2.94259	22.8125	24.2121	15.8481	15.625	15.6596	13.4148	201.748	162.217	160.953	153.864	152.609	172.067	150.861	162.559	166.567	169.11	166.703	167.858	169.262	172.36	134.486	248.329	193.295	77.8438	113.041	103.18	93.9424	-108.767	12.106	10.0667
2526	Nc1c(-c2nnco2)n[nH]c1-c1ccc(Cl)cc1	12	14.1992	109.715	5.28567	16	7	5	1	1	107.978	1002	10.6771	4.8046	5.00585	4.15298	2.94028	3.10756	3.30355	38.5385	32.75	27.125	24.4	27.4483	23.6842	263.242	238.627	188.691	175.062	192.303	164.765	154.284	153.785	156.888	164.908	169.007	166.964	167.817	166.844	22.1297	9.97633	3.57448	-11.6102	-34.1798	-15.8371	5.04778	-29.5046	5.5858	-2.28994
95	CCCC1=NOC(CCCCCCCCC(=O)OC)C1	30.1	14.2515	1166.49	7.7549	0	4	1	3	0	151.583	846	4.4898	0.946237	0.965517	3.09354	1.8627	1.87455	1.89751	17.2653	19.7551	9.92683	9.57983	8.91398	8.82759	174.902	126.546	121.722	116.278	118.71	166.508	146.748	157.05	165.272	165.8	165.817	166.43	165.687	166.491	57.0612	18.6068	-42.0342	-58.7201	-43.3165	-30.7638	-13.6993	-11.9017	4.59184	-2.81258
3753	O=C(Nc1cccc(Cl)c1)c1cn(CCO)c2c(cc(Cl)c3ncccc32)c1=O	7	22.7415	484.297	7.24741	20	8	3	3	2	240.149	1688	9.39113	5.12778	4.21811	5.45794	3.97263	4.5194	3.51575	38.3636	30.9574	26.3627	26.9135	22.95	23.1605	266.981	240.474	231.106	206.547	191.369	158.246	144.829	149.454	154.841	156.477	153.182	157.936	162.077	160.345	31.3245	9.80696	33.0035	-0.0877461	-57.8359	-72.2926	-39.994	-40.4619	9.42097	5.08523
1999	Cc1ccc(C(=O)n2cc(C)n(-c3cccc(C)c3)c2=S)cc1	14	17.982	184.809	6.05223	17	4	2	1	0	144.125	1120	6.88889	2.5671	2.10952	3.51524	2.76764	2.76399	2.38624	27.3171	25.9535	22.3908	19.5842	15.2078	13.0286	241.613	230.137	203.714	196.68	177.273	157.387	143.341	150.813	150.178	157.819	154.803	154.225	156.472	158.32	67.1615	34.6313	-27.13	-12.9721	-27.5181	-66.291	-67.1979	8.91962	13.3064	0.712076
4519	COC(=O)c1c(C)nc(C)c2c1C(=O)C(Cl)=C(NC[C@H]1O[C@@H](OC)[C@@H]3OC(C)(C)O[C@H]13)C2=O	0	25.9043	267.353	6.78249	6	11	2	8	1	313.012	1716	9.51043	3.81456	4.65402	5.39676	3.56319	3.18999	3.26465	29.5862	27.7541	25.4211	22.5065	17.6276	19.1545	220.969	221.642	181.889	162.535	158.927	163.563	146.705	157.823	158.307	157.695	160.261	164.581	165.45	164.162	125.911	74.9121	-67.0322	-17.9435	-81.1608	-129.243	48.9698	108.493	23.8737	14.5841
1659	COc1ccc(C2=NN(c3nc(-c4ccc([N+](=O)[O-])cc4)cs3)C(c3ccc(-c4ccc([N+](=O)[O-])cc4C)o3)C2)cc1OC	16	34.7908	699.991	8.03267	28	13	5	7	0	419.865	2090	10.5282	6.56129	5.63905	6.08499	2.89845	3.49379	3.15688	30.2899	30.2838	24.5442	22.9941	23.4065	22.5621	249.771	237.938	197.823	199.92	220.113	159.641	146.041	150.767	153.203	155.192	158.462	157.252	157.547	156.136	103.209	41.8763	-103.105	-162.501	-76.6195	56.6942	81.5639	-21.5268	18.8885	-0.708885
2123	N#Cc1c(-c2c(-c3ccccc3)[nH]c3ccccc23)n2nnnc2n2nnnc12	14	23.5968	282.364	6.70791	27	10	10	0	0	181.5	1184	12.359	6.57692	4.75862	4.65385	4.04422	3.74679	3.65326	30.359	32.2045	26.3721	27.5806	21.75	17.5172	276.687	260.912	263.719	256.023	215.655	163.351	152.846	151.867	154.218	158.925	158.156	157.237	162.035	171.767	46.0546	52.3537	89.1591	96.8047	61.908	-25.5766	-100.239	-128.02	11	7
2392	CCCCCCCCCCCCCCCCCC(=O)N(C(=O)NC1CCCCC1)C1CCCCC1	12.2	25.5533	130283	13.0302	0	4	2	2	0	237.861	1400	2.88172	0.836502	0.666667	2.55765	2.16156	1.90716	1.67524	15.0538	18.0745	9.23188	9.73234	9.3308	8.19149	170.444	123.354	129.89	135.25	129.778	166.121	146.039	155.348	165.116	166.295	166.221	163.741	163.018	163.798	58.2394	52.129	77.9053	58.627	-52.1297	-90.4639	-83.8742	-38.3032	7.78194	-1.67742
2299	NC(=S)n1c(/C=C/c2ccccc2)nc2sc3c(c2c1=O)CCCC3	13	19.8441	494.126	7.11908	15	6	3	1	0	156.323	1424	7.21164	3.55556	2.59916	3.72197	3.02992	2.8837	2.70206	33.9048	29.7778	22.703	25.2347	23.6933	19.7215	255.122	218.584	205.905	222.007	223.012	156.822	143.549	147.419	152.903	153.826	157.67	157.518	152.011	154.188	46.5465	49.4533	73.4654	3.96649	-86.6652	-121.781	-88.5442	-30.3059	10.3963	7.28175
2655	Cc1ccc(C2=NOC(Cc3ccc4c(c3)OCO4)CC2)cc1	11.25	18.4133	177.265	6.01056	12	4	1	3	0	124.194	944	7.57143	3.40845	3.04688	2.95701	2.41486	2.44484	2.36545	22.4762	25.2444	16.6869	13.7961	14.4789	13.3125	226.902	192.862	154.455	166.424	161.67	159.289	143.26	150.466	154.538	159.369	161.431	159.368	160.948	161.515	58.0748	-0.61678	-65.7211	-43.3039	-13.7279	-16.7302	8.1678	-8.99093	7.0017	-5.21712
4170	Cc1ccc(-c2nn3c(-c4nc5ccc(Cl)cc5[nH]4)c(-c4ccc(Cl)cc4)nc3s2)cc1	3	26.208	392.033	7.1345	29	8	5	0	2	137.625	1958	8.71605	6.13889	4.83416	2.92819	2.98598	2.84145	2.68381	41.6596	33.5	28.0686	26.0577	29.3478	31.5778	286.212	253.909	246.578	275.107	261.473	155.674	143.599	146.892	151.843	158.446	157.969	153.418	153.714	150.605	50.6154	22.2074	28.4515	66.0257	19.5847	-61.5445	-92.3452	-122.896	9.5034	0.940697
3581	COc1ccc(NS(=O)(=O)c2c(O)c(C(=O)O)c(OC)c3ccoc23)cc1	8	20.8074	404.387	6.99562	15	10	1	8	0	334.105	1444	11.4868	5.47556	4.92537	7.95488	6.5901	4.2379	4.12728	34.381	35.75	31.7711	32.4742	20.2667	19.1642	243.744	254.021	199.118	171.031	186.602	160.273	145.467	152.499	150.786	154.592	157.695	165.305	161.703	157.999	21.2016	40.4147	-26.6828	113.966	-84.8773	-64.5616	6.37339	-55.6286	14.3277	10.9654
3585	COc1ccccc1-n1c(S)nnc1-c1csc(N(C(C)=O)C(C)=O)n1	8	20.0224	202.341	6.26547	16	10	5	3	0	216.447	1540	9.99398	4.93037	5.44256	5.2792	2.81114	3.24111	3.78419	37.561	32.7674	30.3867	33.0357	22.76	25.1525	251.264	250.176	217.416	186.091	184.039	161.7	147.993	157.07	158.951	154.516	158.003	159.86	163.84	165.596	89.7158	47.74	-66.5528	-59.585	-64.022	10.9146	16.4367	-40.127	15.8269	9.50327
3170	N#Cc1c(N)c2c(N)c3c(nc2oc1=O)OC(c1ccc(Cl)cc1)=CC3c1c(-c2ccccc2)[nH]c2ccccc12	10	33.1054	547.676	7.71667	31	9	5	3	1	287.033	1898	9.82959	6.07761	5.6921	4.70546	3.47229	3.20083	3.34719	31.1148	29.6269	25.1103	23.9627	21.4271	21.0746	271.212	255.451	233.072	239.153	229.986	156.336	144.095	144.176	149.185	154.181	154.53	151.896	152.71	155.013	54.3588	60.3994	50.6195	11.0725	-52.9102	55.3554	-97.3111	-89.9937	17.1688	5.51411
3952	COc1ccc(C2CC(=NOC(=O)c3cc(OC)c(OC)c(OC)c3)CC(c3ccc(OC)cc3)N2C)cc1	5	29.6342	539.105	7.65089	18	9	2	7	0	269.333	1660	8	3.63077	3.93678	3.6895	2.83799	2.8661	2.93902	22.7397	25.0526	20.974	17.1289	14.9128	16.3621	215.941	220.189	164.054	163.178	160.891	161.804	145.641	156.77	152.779	156.127	160.598	160.296	162.778	161.326	121.913	1.69825	-48.945	-77.3002	7.32201	0.578533	-20.5074	-73.1843	25.277	3.30362
789	Cc1nn(-c2ccccc2)c(Cl)c1C1CC(C2C(=O)NC(=O)NC2=O)=NN1	20.1	21.4366	219.357	6.38395	11	10	6	3	1	256.589	1402	10.1811	5.32778	5.23488	6.10925	2.98032	3.20846	3.83982	33.381	30.1111	24.3939	26.17	20.425	23.1772	244.74	216.048	194.182	185.77	191.646	164.791	151.861	155.078	161.773	163.782	167.461	161.787	160.185	167.406	51.8867	11.8464	-76.2302	26.4281	-73.2774	-19.1738	59.7043	46.0119	8.63776	-0.25
2835	Cc1cc(C)n(CC(=O)c2ccc(F)cc2)n1	11	13.0846	87.8257	5.00598	11	4	2	1	1	183.139	724	8.86667	3.37838	2.72973	6.10463	3.87421	3.5976	2.86787	24.1333	25.3871	18.9	15.1746	16.1892	11.8108	226.329	199.013	162.109	152.37	191.582	165.458	147.222	155.819	162.652	163.224	162.215	168.83	159.244	160.309	52.8044	0.764444	-101.933	-33.6533	66.1111	11.3689	-74.5022	29.6311	6.33444	-3.94222
4194	NC(=S)NNC(=O)c1cc2ccccc2[nH]1	2.5	12.2681	132.072	5.35335	9	6	4	1	0	129.319	886	8.40171	2.7619	1.91667	4.97382	4.11632	3.13977	2.28549	34.0769	29.3333	21.2885	18.4082	20.5	17.4167	243.555	199.583	176.874	186.198	179.26	163.649	155.352	153.194	159.42	164.953	164.538	164.499	166.549	163.076	12.4681	-5.01446	-10.2137	-11.43	7.76068	-40.5161	-35.2176	4.53386	3.55621	-3.02367
2814	O=C(NN1C(=O)C(CN2CCCCC2)SC1c1ccccc1O)c1ccc(-n2c(-c3ccccc3)nc3c(Br)cc(Br)cc3c2=O)cc1	11	38.3144	1501.58	8.88289	28	12	5	4	2	357.104	4534	8.03264	4.37368	3.86414	4.52031	3.46837	3.31191	3.06632	57.3924	32.0941	26.495	30.6009	24.5536	23.3182	256.911	216.754	218.831	225.938	210.308	157.994	144.219	149.772	155.33	159.35	157.371	153.899	154.86	156.739	78.87	64.688	95.6753	96.5611	57.5758	-142.018	-122.583	-29.7062	15.2458	1.62955
2550	CC(=O)NC[C@H]1CN(c2ccc(N3CCOCC3)c(F)c2)C(=O)O1	12	18.6606	222.174	6.27893	6	8	3	4	1	265.917	1080	9.09091	4.22059	4.25	6.04356	4.42754	3.47794	3.72817	24.5455	25.9783	17.4434	16.6075	15.9265	19.0179	208.42	177.601	157.189	148.681	152.309	168.321	150.592	161.92	165.572	162.483	166.255	170.802	171.497	163.16	62.7314	0.626033	-76.5083	-19.5062	-4.09091	14.6901	2.86777	-75.8843	7.35537	-0.570248
844	COc1ccc(F)cc1-c1cccc(-c2nn(CCO)c(=O)o2)c1	20	18.4418	163.947	5.97501	17	7	2	4	1	257.444	1062	10.6667	5.17568	5.62295	6.60114	3.66944	3.76839	4.12204	27.2308	28.0244	21.9625	21.0244	17.4865	18.2787	235.776	218.709	203.602	187.929	169.985	164.028	147.543	155.538	158.057	158.348	158.301	159.866	165.406	165.673	52.1315	31.687	-21.4326	-82.378	-35.8764	-45.7403	10.2755	24.908	9.54372	4.20184
3371	O=C1Nc2ccccc2C1(O)Cc1nc2sccn2c1[N+](=O)[O-]	9	18.5464	148.097	5.83077	14	9	4	4	0	274.927	1222	12.0741	8.37908	4.75	8.33112	5.50309	6.59998	4.59306	37.0303	34.1944	26.75	24.0123	31.4706	23.025	262.899	233.505	196.661	208.59	224.25	161.163	149.29	149.81	156.456	161.88	162.277	164.18	162.084	160.496	25.3294	22.7016	-16.6182	-46.8414	-10.4261	39.2434	-4.603	-84.1092	7.58953	-1.72452
2113	COc1ccc(C2C(C#N)C(=N)N3C(NC(=O)C4C(c5ccccc5)CSC43)C2C#N)cc1	14	25.8964	452.781	7.30933	12	8	5	2	0	273.003	1552	7.86508	4.42537	4.44248	4.87506	3.91253	3.4877	3.81932	27.7143	27.9333	20.9481	21.1292	17.7537	18.4867	241.946	218.571	189.824	178.453	182.299	159.954	144.276	148.604	153.783	156.931	157.98	163.294	162.348	159.049	42.1202	-28.5193	-65.2698	-19.1837	64.1293	8.87982	-38.9342	1.79592	15.0548	1.10555
4388	Cc1nn(-c2ccccc2)c2nc3c(nc12)C(=O)c1ccccc1-3	0	19.6538	219.173	6.26533	21	5	4	1	0	157	956	10.0556	4.04545	3.42105	4.36111	3.54188	2.86869	2.80702	26.5556	28.675	24.7595	22.8701	16.7273	15.5439	266.93	243.212	237.385	234.034	202.682	157.181	143.919	148.276	156.811	158.181	157.921	154.196	154.979	152.858	56	61	49.75	-36.75	-87.75	-96.25	-83	-31.25	11.9383	7.25926
3643	COc1cc(C2CC(=NOC(=O)c3ccc([N+](=O)[O-])cc3)CC(c3ccc(O)c(OC)c3)N2C)ccc1O	8	29.3242	835.331	8.06283	18	11	3	8	0	401.361	1658	9.6	5.1573	4.59551	6.17479	2.99844	3.88233	3.40793	25.5077	26.8824	21.5102	17.1556	17.9494	16.809	226.697	218.038	169.643	178.3	179.513	162.055	147.163	153.402	154.153	158.858	160.97	159.955	161.741	158.46	86.1853	18.2578	-63.4267	-123.234	-21.4781	-7.00402	23.7344	94.3191	17.4516	-7.10083
19	N=c1c(C(=O)Nc2nc3ccccc3s2)cnc2sccn12	37	17.6942	144.168	5.75943	18	8	5	1	0	159.535	1334	10.2867	7.0614	5.96405	5.14628	3.80445	3.81368	3.37837	43.0323	37.2941	29.7742	29.8983	28.7632	33.8824	285.016	249.827	211.512	232.104	246.05	157.926	146.813	149.401	154.108	161.018	161.084	159.996	154.363	150.373	15.5472	-2.89617	1.54122	-24.0526	-8.83489	6.29206	-10.833	-30.9295	5.47971	-1.76171
3276	Cn1c(C23CC4CC(CC(C4)C2)C3)nn(CN2CCN(c3ccccc3)CC2)c1=S	10	24.7441	1786.46	8.58661	11	6	5	0	0	123.66	1398	4.8642	1.67574	1.753	1.96285	1.78363	1.74339	1.65263	22.1905	23.5735	15.2	11.7679	13.551	11.5827	206.405	173.767	155.125	144.944	149.018	163.633	147.169	156.31	157.401	166.159	163.727	165.647	162.47	162.045	73.2373	0.828532	-52.3868	-40.8697	-59.4842	-64.1989	-37.1811	73.3182	14.1585	-5.36861
1162	Nn1c(SCC(=O)Nc2ccc(Cl)cc2)nnc1-c1cc(F)c(Cl)cc1Cl	18	20.9602	750.29	7.61371	17	11	5	1	4	225.353	2100	10.2437	4.54927	6.00309	5.93033	4.34873	3.23519	3.34503	55.2632	38.075	36.7792	32.3421	33.9245	34.75	285.181	251.245	226.495	209.987	224.41	163.679	150.459	152.148	158.929	164.703	166.037	165.395	162.195	160.716	31.8172	-0.0806402	-75.068	-13.8337	-5.68975	70.2748	-42.2776	21.9884	4.38366	-6.65166
2772	Cc1ccc(OCc2ccccc2-c2nnc(-c3cc(C)cc(C)c3)o2)cc1	11	22.1272	358.922	6.91272	23	4	2	2	0	147.75	1112	7.44	4.53659	3.84783	2.955	2.77891	2.74932	2.60024	22.24	24.9245	18.8942	15.7686	18.3415	16.5217	235.353	216.611	183.178	186.856	222.317	158.093	142.711	149.4	149.057	159.359	159.892	163.327	150.287	153.225	81.0592	42.6032	-8.5344	24.6944	-8.2816	-75.5328	-76.4352	-32.6112	12.1872	-1.5488
3406	Cn1c(=O)cc(Oc2nc(NCCO)nc(Nc3ccc(C#N)cc3)n2)c2ccccc21	9	24.8058	771.963	7.81209	22	10	7	3	0	271.5	1346	9.88235	7.05263	6.05	5.32353	3.95125	3.94035	3.76222	26.3922	27.963	21.6273	21.0631	22.7789	20.94	240.399	215.111	197.803	207.07	214.228	163.489	149.824	157.154	159.166	161.914	164.441	164.455	163.614	162.662	61.9123	54.7324	3.97539	-24.8316	-43.7017	-55.8897	-75.7432	-81.0331	10.2734	3.14302
1625	N#Cc1ccc(-c2ccc(-c3cccs3)o2)cc1	16	14.0613	110.995	5.29727	16	3	1	1	0	113.809	918	8.83128	5.06897	3.76543	4.21515	2.50334	3.29885	3.05098	34	31.8621	22.7736	22.9375	24.4828	19.0741	284.777	229.998	208.363	208.173	238.334	150.748	137.368	139.557	148.417	150.521	153.035	150.996	147.886	149.799	17.5106	-1.07133	-26.5681	-40.1532	-27.8903	12.9355	18.5147	-1.23045	3.92044	-4.16049
1284	O/N=C/c1nccn1Cc1ccccc1	17.9	11.2733	81.8961	4.81092	11	4	3	1	0	108.806	618	8	2.81818	2.36842	4.18483	3.23504	2.88889	3.57895	23.7692	25.9259	16.7255	14.9623	12.2424	11.3684	228.728	191.177	171.983	174.146	134.881	163.385	149.535	155.611	157.585	162.488	165.511	160.132	167.529	172.472	16.0059	-27.8284	-22.7751	23.1598	3.42604	-37.4615	6.88757	-12.1953	3.85059	-2.69822
4465	CCOC(=O)CSc1nnnn1-c1ccccc1	0	13.4635	178.038	5.76978	11	7	4	2	0	141.503	988	9.14815	4.11765	3.14286	4.71678	3.84237	3.32789	3.7381	32.9333	31.2581	25.6727	24.449	18.5882	16.2286	234.484	198.322	187.64	189.332	183.337	164.565	150.641	156.725	161.116	162.292	167.346	163.021	162.527	170.758	56.6538	40.1358	-58.8765	-39.9477	8.35457	56.0365	-33.2588	-89.5086	5.77778	3.88889
2816	CCOC(=O)Cn1c(=O)n(C2CCN(C3CCc4cc(OC)c(OC)cc43)CC2)c2ccc(Cl)cc21	11	28.208	535.466	7.56407	15	9	3	5	1	259.116	1760	7.31772	2.19336	2.38667	3.81054	2.38775	2.27294	2.46092	25.8824	25.6667	19.0234	17.724	14.1324	14.4229	216.846	197.943	166.569	158.36	145.773	162.793	146.321	157.223	158.384	157.135	160.749	160.947	163.522	166.243	109.999	52.4329	-30.0979	-109.133	-83.6641	-68.6495	-40.6616	-123.252	21.91	11.7958
3363	N#Cc1c(-c2ccc(Cl)cc2)cc(-c2cccs2)nc1O[C@@H]1O[C@H](CO)[C@H](O)[C@H]1O	9	23.3796	239.627	6.5777	17	9	2	5	1	263.787	1736	9.3202	5.9391	4.45546	5.61248	3.90518	3.97921	3.81617	36.9362	31.68	24.4727	23.0741	28.375	25.1982	257.268	214.797	220.163	238.27	242.493	158.117	143.577	147.789	156.235	157.928	156.844	154.893	152.236	153.569	13.277	-6.82935	53.4815	21.4552	-3.13977	-56.0018	-105.64	-106.883	8.54731	-2.64509
4450	CN(C)c1cccc2c(S(=O)(=O)ON3C(=O)CC3CBr)cccc12	0	18.7265	150.606	5.89014	10	8	2	4	1	237.656	2428	8.47589	3.21837	2.2479	5.79648	3.51704	3.19933	3.42798	59.2195	37.4419	29.5169	28.4653	21.8442	21.0933	242.855	226.15	199.701	172.109	183.332	160.573	144.667	155.426	154.281	155.907	156.619	162.004	157.477	164.412	32.4074	73.3612	20.7117	-7.06826	-17.8656	-72.0434	-9.26801	-151.463	11.5913	2.85425
4292	CCN(CC)c1ccc(C2C(Cl)C(=O)N2c2ccc(-n3c(Cc4ccccc4Nc4c(Cl)cccc4Cl)nc4ccc(Br)cc4c3=O)cc2)c(O)c1	0	41.1309	2463.13	9.45785	34	12	5	3	4	331.566	4002	7.71626	4.63187	4.58837	3.90078	2.96464	2.90141	2.69495	47.0824	30.4945	26.2709	24.9186	22.632	23.0395	259.382	232.383	205.612	205.702	211.648	158.008	144.027	149.906	155.829	154.137	156.656	156.727	155.18	156.611	101.57	62.7382	-15.9118	-19.441	19.9556	8.19917	-16.7134	45.3942	23.5074	2.29176
265	Cn1c(-c2ccc(-n3cncn3)cc2)nc2c(F)cc(F)cc21	26	18.4703	239.347	6.31082	20	7	5	0	2	229.444	994	12	6.09804	7.5	6.74837	3.44781	3.70153	4.52924	29.2353	30.027	24.5286	22.4267	18.6471	22.5526	255.554	239.697	198.504	175.733	175.992	168.415	150.618	158.838	160.03	164.51	161.752	165.759	167.796	176.083	45.7301	1.36678	-60.2388	-32.8062	-37.0657	-8.29066	59.3529	-37.4775	8.27076	-1.20242
2878	CCSc1ccc(OCc2nnc3sc(-c4ccccc4N)nn23)cc1	10	20.4537	719.571	7.53417	20	8	5	1	0	137.035	1486	7.88114	4.81026	4.06548	3.18685	2.75549	3.05123	2.87831	34.5581	32.0435	25.3488	23.0843	22.5692	23.1964	250.657	221.219	188.714	188.263	203.738	160.051	147.213	150.792	155.959	156.521	158.88	163.662	163.453	160.133	59.1631	46.1109	20.615	-8.83751	57.2988	14.2368	-71.8393	-71.4268	11.0103	4.62899
2936	Cc1ccc2[nH]c(-c3ccccc3)c(C3C=C(c4ccccc4)Oc4[nH]c(=O)nc(N)c43)c2c1	10	27.5414	393.036	7.19768	27	6	4	2	0	215.861	1354	8.32143	4.9027	3.91892	3.85466	2.97771	3.0036	3.16637	24.1786	26.5246	20.7879	20.0068	18.5027	16.7135	249.078	233.007	223.252	226.674	208.145	157.755	144.745	146.652	150.481	154.543	153.72	152.315	154.815	158.202	59.5523	43.1849	-12.148	17.2628	-10.986	7.07526	-68.9222	-144.172	14.9439	6.13776
1329	NC(=S)n1nc(Nc2nc(-c3ccccc3)cs2)cc1-c1ccccc1	17	20.5631	251.709	6.48379	22	7	5	0	0	128.795	1456	7.82656	4.02576	4.32778	3.14134	2.75243	2.60504	2.67428	35.5122	31.3182	23.3333	25.3494	25.7971	23.1167	266.42	225.512	218.838	212.256	203.27	157.408	146.736	147.855	155.115	155.914	156.986	158.559	159.286	156.728	31.4518	6.15943	-11.6003	-29.7636	-23.1192	-28.8231	14.3058	-2.74896	7.21773	-0.138608
2676	COc1ccc(/C=N/NC(=O)c2ccc(-n3c(-c4ccccc4)nc4c(Br)cc(Br)cc4c3=O)cc2)cc1	11	29.8125	5898.41	10.0174	28	9	4	3	2	262.101	3902	9.2437	4.94344	4.59259	4.51898	3.34378	3.12566	3.28826	67.2759	33.6129	30.881	37.4351	29.3643	28.3488	274.705	248.017	228.641	240.802	234.124	156.135	143.443	147.977	151.633	156.984	157.412	152.204	149.74	155.681	53.4742	7.50197	8.75473	-23.4349	-60.7036	-88.104	-39.8651	49.3082	11.9298	-0.65874
215	Cc1cc(C)c2c(N/N=C(/C#N)C(=O)Nc3ccc4c(c3)C(=O)c3ccccc3C4=O)[nH]nc2n1	27	27.7197	1235.8	8.37223	21	10	7	3	0	330.889	1452	10.9615	8.42353	8.2875	6.36325	3.8304	5.02026	5.22361	27.9231	29.0179	25.1947	22.496	23.3882	23.5375	259.014	248.592	201.137	192.745	217.965	160.548	147.535	150.284	154.288	158.043	163.311	163.328	162.472	161.847	72.7456	52.6154	5.48521	-49.2781	-151.302	55.6154	42.0355	51.6036	14.9275	0.879808
3052	COc1ccc2nc(C)cc(-n3cc(CN4CCN(c5ccccc5F)CC4)nn3)c2c1	10	25.4724	646.003	7.63396	21	8	6	1	1	217.722	1328	8.17544	3.15126	3.56842	3.81969	2.74452	2.39449	2.63246	23.2982	25.9016	18.9549	16.4667	13.9496	16.0737	224.471	203.96	170.618	159.269	154.308	165.306	149.009	158.497	160.713	161.076	164.615	167.416	168.411	160.741	91	9	-50	-23	-52	-86	-57	-73	14.1277	-0.0624808
1611	O=C(Cn1c2ccccc2c2nc3ccccc3nc21)N1N=C(c2cc3ccccc3o2)CC1c1cccc([N+](=O)[O-])c1	16	35.1982	968.816	8.33469	32	10	6	4	0	344.417	1760	10.4	6.7069	6.31429	5.29872	3.75273	3.69636	3.6654	27.0769	28.9861	22.4331	21.3129	21.1724	20.2971	261.313	229.929	215.965	224.404	217.93	157.872	144.726	148.355	156.084	157.325	158.712	157.346	156.896	156.114	71.1922	33.5221	-30.2125	-93.617	-41.7709	-47.3247	-46.5612	21.4355	12.4137	-0.367101
2961	CCN1CCN(c2c(-c3nnc(S)n3CCOC)cnc3c(C(F)(F)F)cccc23)CC1	10	24.9498	376.086	7.09297	15	11	6	1	3	330.562	1638	9.25103	4.10133	3.8951	5.79933	3.00507	2.95282	3.5813	28.7368	27.4833	21.2782	19.7898	19.3836	18.646	218.862	207.519	180.466	182.053	184.153	171.167	151.141	165.684	161.083	163.235	164.779	167.189	165.403	168.41	105.922	115.07	62.6377	116.494	85.0379	-115.623	-152.156	-86.3833	16.6667	13.2222
1013	CC1NN(c2ccccc2)C(=O)C1C1=Nc2ccccc2NC1	19	18.3609	177.614	6.01252	12	5	4	1	0	152.194	926	7.36585	2.90698	2.47297	3.71206	2.614	2.573	2.45495	22.5854	25.2955	18.1373	16.7961	13.4419	11.9324	228.597	193.139	177.488	165.769	159.876	161.981	147.976	152.882	161.032	162.985	162.652	160.713	160.645	164.123	45.8364	18.9857	-14.2695	-65.0964	-81.4474	-6.62522	1.8144	-5.50684	9.64723	0.0957763
1642	Cc1cc(=O)oc2cc(Oc3nc(Nc4ccc(/N=C/c5ccc(Cl)c(Cl)c5)cc4)nc(N(C)C)n3)ccc12	16	30.9002	1907.49	8.91452	28	11	6	3	2	241.483	2094	9.33131	5.85894	5.26882	3.95873	3.45319	3.1122	3.11547	34.3279	30.0154	26.7008	20.8116	22.6	21.7581	256.71	236.745	203.887	212.071	221.685	160.304	146.397	155.068	153.91	162.789	160.676	162.373	158.125	156.381	94.5262	60.255	-31.4574	-1.65798	-87.175	-85.6119	-72.5855	8.2207	11.5714	-4.32169
3806	O=C(NC(=S)Nc1cccc(O)c1)c1cn(CCO)c2c(cc(O)c3ncccc32)c1=O	7	24.9722	1277.81	8.31606	20	10	4	5	0	322.236	1582	9.88889	5.67273	5.39427	6.44472	4.07188	5.07259	4.59933	31.64	29.2453	23.9386	24.75	21.1909	21.1613	250.577	229.771	218.947	192.196	184.547	159.951	147.804	150.458	155.344	157.758	154.504	160.389	162.309	162.301	27.4725	3.744	25.5474	5.90578	-62.8587	-53.84	-32.1049	-4.07147	11.2128	4.256
1037	COc1ccc(F)cc1-c1cccc(-c2n[nH]c(=S)o2)c1	19	16.3609	120.028	5.52966	17	6	2	2	1	167.875	1114	10.5764	5.10303	6.04386	5.24609	3.25345	3.61352	4.23449	34.8125	30.7647	25.1129	22.2969	19.9091	23.6316	262.122	244.125	210.634	185.895	172.598	160.634	146.14	151.325	151.42	154.272	155.988	160.211	167.683	167.062	38.0035	-5.39236	-47.6007	-46.6528	-3.61632	6.60417	5.84549	19.2743	6.50195	0.458984
633	O=C1C2C(NC3CCCCC3C2c2ccccc2)NC2NNNN12	22	19.5849	190.186	6.12347	6	7	6	1	0	153.472	994	6	1.70345	0.990741	3.19734	2.41977	2.32184	2.02315	20.7083	24.0385	14.8816	14.1879	10.8897	8.06481	200.46	168.265	158.182	149.175	126.93	167.634	153.571	157.534	162.674	164.462	163.672	165.83	169.65	175.072	36.1111	16	15.2222	26.6667	-22.5556	-75.1111	-88.5556	-44.6667	9.44444	1.33333
1050	CN(N)S(=O)(=O)c1ccccc1	19	8.89868	45.7911	4.00641	6	5	2	2	0	154.883	744	7.65657	0	0	7.04013	2.41379	1.52941	1	33.8182	37.8636	24.907	15.4286	3.11765	1	217.802	201.24	155.555	98.5217	63.8955	165.339	150.242	159.326	155.898	169.148	164.358	170.358	174.444	184.918	-15.0606	33.8062	32.6841	-87.2084	-41.8466	-9.06152	22.966	17.0845	5.27273	-5.10744
4198	COc1cc(C2CC(c3cc4ccccc4o3)=NN2C(=O)Cl)ccc1O	2	20.5916	201.531	6.26145	15	7	2	4	1	201.561	1342	9.69768	5.5875	4.65741	4.91612	3.64825	3.65509	3.58269	32.7317	29.6591	23.6222	21.9896	23.5875	21.75	252.908	226.827	191.463	209.906	201.115	158.91	144.988	150.59	154.393	155.903	160.061	158.573	161.403	160.17	49.0434	-1.17622	-49.5654	-64.5407	-15.475	24.0647	17.6745	10.8196	9.87626	-0.848305
3938	Cc1nn(C(=O)Cc2cccc3ccccc23)c2c1nnc1cc(Cl)c(F)cc12	5.11	23.4081	406.825	7.07309	23	7	4	1	2	232.616	1436	10.4094	5.6719	5.26316	5.40968	4.23167	3.84406	3.3482	33.3953	30.2979	26.6327	23.4314	22.5059	23.1447	270.307	249.523	214.331	207.009	213.115	160.01	144.602	148.355	155.679	157.901	158.6	161.341	160.219	157.284	62.1035	32.103	-37.8183	-38.5767	11.2777	22.3097	-9.86747	-110.923	11.0081	0.867496
944	Fc1ccc(-c2csc(N/N=C(/Cn3nnc4ccccc43)c3ccc(Br)cc3)n2)cc1	19.83	25.5129	443.413	7.25765	26	9	6	0	2	207.054	2700	9.48983	5.85106	5.37403	4.31362	3.1521	3.07941	2.87614	56.25	34.3462	26.6373	23.7327	30.6596	30.0769	274.486	228.369	208.135	226.257	234.765	160.268	146.65	149.633	157.752	161.798	162.355	160.76	158.945	154.643	41.204	-17.6722	-64.7601	-60.7873	45.7836	22.5328	-61.3995	-33.248	5.44444	-7.36111
2409	O=C1CC(c2ccccc2)=NN1C1CC(C(F)(F)F)Nc2c1cccc2C(F)(F)F	12	24.0316	289.319	6.76614	12	10	3	1	6	527.097	1432	13.8222	11.3271	6.73418	11.7133	5.7821	11.8207	6.20359	31.8222	30.0417	22.6903	22.4262	27.6355	20.7215	243.226	212.423	199.668	194.903	186.426	176.67	150.776	162.85	164.337	170.423	170.745	174.709	186.976	170.541	50.1837	103.257	-41.599	-109.803	-16.9995	2.32395	106.522	-12.1106	1.52	-1.2
3392	Cc1ccc2[nH]c(-c3ccccc3)c(C3C=C(c4ccc(Cl)cc4)Oc4[nH]c(=S)nc(N)c43)c2c1	9	28.3579	423.775	7.30196	27	7	4	1	1	168.13	1834	7.82231	4.59339	3.45045	3.00232	2.7648	2.74184	2.73883	32.75	28.8852	23.2727	22.0342	20.7081	20.1297	264.315	243.135	228.772	234.157	217.025	156.061	144.027	145.573	149.352	153.498	152.629	151.297	153.659	156.303	56.0226	24.7472	-18.6774	-12.5731	8.65632	4.11462	-79.5394	-157.264	13.9072	3.80772
4097	O=c1c2cc(Br)ccc2nc(Cc2ccccc2Nc2c(Cl)cccc2Cl)n1-c1ccc(/N=C/c2ccccc2[N+](=O)[O-])cc1	4	35.6073	1462.83	8.79221	34	11	5	3	3	336.922	3486	9.37727	5.27757	4.6948	5.02869	3.0231	3.11167	3.07406	52.0299	32.6528	27.961	26.9136	24.6333	23.1967	278.515	244.455	228.094	244.282	229.852	156.233	143.543	146.054	153.664	156.775	156.566	151.598	151.971	155.853	50.0933	10.3086	-11.749	-34.8971	-66.5089	-74.5446	-1.60905	-14.8162	9.89174	-5.80129
1488	Nn1c(SCC(=O)c2ccc(O)c(O)c2)nc2sc3c(c2c1=O)CCCC3	16	21.4366	784.779	7.65865	15	9	3	4	0	267.868	1580	8.83838	4.72381	5.46154	6.08791	4.13349	3.93051	3.32991	35.9091	32.1915	26.9423	25.8952	24.4857	21.3846	248.654	223.358	191.916	193.883	199.726	159.456	145.907	148.329	153.073	157.054	160.289	161.407	160.396	157.243	48.0278	50.2222	8.83333	-62.4722	-37.6111	-91.7222	-37.6667	91.0278	11.6875	0.5
3376	O=C(NC(=S)Nc1cccc(Cl)c1)c1cn(CCO)c2c(cc(O)c3ncccc32)c1=O	9	24.9722	1277.81	8.31606	20	10	4	4	1	287.047	1806	9.59284	5.6214	5.04884	5.8581	3.99712	5.01645	4.22784	36.8571	30.6923	25.3839	26.569	21.9537	22.9341	260.926	235.44	224.67	198.011	187.773	159.088	146.944	150.252	155.095	157.149	153.673	159.914	162.031	161.976	29.3185	5.70342	41.4767	2.70814	-48.2099	-60.8776	-28.7449	-28.4378	10.09	4.37609
436	O=C(NS(=O)(=O)/C=C/c1ccc([N+](=O)[O-])cc1)c1ccc(Cl)s1	24	17.6451	154.334	5.87203	11	10	2	5	1	326.253	1696	11.8279	5.51163	5.74286	10.1954	5.4968	5.04572	3.97751	53	45.1212	30.6562	30.623	30.7442	33.3143	282.862	229.177	220.343	227.121	215.985	157.661	143.921	146.726	154.288	159.479	157.561	157.633	160.136	157.077	-11.5185	35.7795	-46.0154	3.16884	-17.107	-8.17212	-74.0951	-30.7468	-2.01465	-7.07422
3217	Cc1ccccc1Sc1nc(SCc2ccc(Cl)cc2)nc(-c2ccccc2)c1C#N	10	24.0986	422.951	7.17866	24	6	3	0	1	164.151	1866	7.3162	4.78563	3.84696	3.35002	3.15304	3.13133	2.85657	38.0816	32.0769	27.6019	26.8962	26.4343	22.1132	277.039	249.227	246.845	261.678	253.928	153.366	139.042	143.396	147.289	153.091	151.051	151.213	148.525	150.651	41.0983	-2.13772	9.91363	60.7922	39.353	-66.7974	-121.967	-110.335	8.85339	-1.02207
3636	COc1cc2nc(Sc3nnc(N)s3)n(-c3ccc(C)cc3)c(=O)c2cc1OC	8	22.7129	280.28	6.7005	21	10	5	3	0	202.118	1650	9.45411	5.19608	4.44792	4.39387	3.54909	3.36816	3.44563	35.8696	33	29.8391	27.6634	25.3922	22.7708	252.925	259.237	219.906	239.523	218.846	160.433	147.369	153.797	150.901	155.173	157.291	154.403	157.954	158.2	72.4188	26.8389	1.72065	-8.12518	44.3882	-15.2693	-73.2336	-139.12	16.802	8.47401
62	NC1CCN(c2c(F)cc3c(=O)c(C(=O)O)cn(C4CC4)c3c2Cl)C1	32	20.0509	186.567	6.14508	10	8	3	3	2	285.839	1338	9.27631	3.4127	2.22078	6.80568	4.01035	4.69617	2.95759	31.8571	28.3556	23.1509	25.7182	18.6593	12.4675	233.056	207.852	213.007	185.104	163.094	165.736	148.905	155.614	162.072	160.699	160.012	164.22	169.322	166.313	53.7325	64.6063	79.059	57.727	-33.0919	-117.092	-162.011	-50.8368	11.2296	3.03798
486	Nc1nc(-c2ccc(Nc3cc(=O)oc4ccccc34)cc2)cc(-c2ccc(O)cc2O)n1	23	26.3983	234.317	6.6506	28	8	4	4	0	276.833	1370	9.92157	4.6422	4.66667	5.4281	3.72464	3.45311	3.31308	26.8627	28.1636	22.2743	20.5847	17.1651	16.2708	254.632	234.155	208.639	203.074	189.181	158.532	146.11	146.793	153.835	155.462	156.404	157.097	159.665	159.025	33.7093	8.28028	-64.917	-26.6332	-54.5294	-14.5329	-71.391	48.2007	9.07536	-3.77201
1072	Cn1ncc2c(NCCc3c(F)cccc3Cl)ncnc21	19	16.3894	268.161	6.33353	15	7	5	0	2	161.228	1132	9.2825	5.91489	6.87566	4.74199	2.56536	3.13834	3.5268	33.2941	29.3889	23.8333	21.9041	21.8723	27.2143	242.086	213.914	160.766	158.473	196.422	167.852	151.562	160.372	162.29	167.499	166.501	170.855	166.361	159.851	49.2223	20.5879	-41.5779	-111.77	-56.0617	-0.242172	53.3324	48.6837	8.0519	-0.32526
2650	CCCCCCCCCCCCCCCC(=O)Nc1ccccc1O	11.5	17.856	16064.9	10.6007	6	3	1	2	0	188.083	1006	3.51613	0.80597	0.825397	3.0336	1.96726	1.81343	1.79167	16.2258	18.7258	9.69325	9.2293	8.40299	8.38095	179.735	127.223	123.136	122.424	119.549	164.735	145.787	153.685	164.033	165.003	164.623	164.242	164.456	164.626	42.6774	35.4641	55.3975	34.1155	32.6119	-16.3663	-13.7773	-7.65869	4.19355	-3.73751
2730	CCN1C(N2CCN(Cc3ccc([N+](=O)[O-])s3)CC2)=NS(=O)(=O)c2ccccc21	11	22.9002	756.834	7.69385	11	11	5	4	0	311.692	1682	8.65778	2.22464	2.5034	6.23384	3.01304	2.73659	2.74814	33.64	34.4151	23.7705	20.8309	12.3913	15.1939	231.035	202.375	179.697	158.649	131.08	163.565	147.976	158.74	158.797	162.377	161.866	159.442	168.56	167.831	32.0377	76.7031	9.03342	-27.8722	-93.3442	-120.767	-22.6441	-5.40587	10.57	4.85
3524	O=C(c1cccnc1Nc1nc2ccc([N+](=O)[O-])cc2s1)N1CCNC(Cl)C1Cl	8	22.8913	210.908	6.41613	15	12	6	3	2	268.82	1946	10.178	5.10847	4.46391	6.25162	3.64964	3.05249	2.94865	45.2558	35.087	30.46	28.0303	25.9524	26.5	263.924	227.187	227.905	229.299	210.392	163.065	150.425	155.947	160.194	162.222	160.16	160.706	162.212	159.756	35.6619	21.6802	22.3715	-43.2012	-39.5802	-12.0313	10.7066	5.48754	4.56896	-2.62574
1320	CCOC(=O)C1=C(C)NC(C)=C(C(=O)OCC)C1c1c[nH]nc1-c1ccc(-c2ccccc2)cc1	17	26.9032	617.435	7.67834	17	7	3	4	0	265.833	1440	7.625	2.75	2.55026	4.15365	3.60997	2.80262	2.93254	22.5	24.6716	19.5143	20.5443	14.0096	13.9524	224.303	218.442	201.29	185.783	161.687	160.756	145.358	152.03	153.757	153.693	156.179	158.405	162.642	161.837	104.964	84.002	-5.64453	-52.4238	-93.9717	54.6738	-181.922	-167.495	22.0593	15.895
3681	COc1cc2nc(Sc3nnc(N)s3)n(Cc3ccccc3)c(=O)c2cc1OC	8	22.644	318.854	6.82944	21	10	5	3	0	201.59	1650	9.36715	5.05128	4.91667	4.3824	3.48418	3.38592	3.37195	35.8696	33	28.4944	26.3168	24.6538	24.1739	252.925	247.795	221.833	227.037	214.229	160.433	147.369	153.985	151.256	157.067	156.66	155.571	159.594	155.646	58.1724	3.08528	-4.31737	-32.9851	44.607	-5.68011	-108.243	-74.0676	14.0411	5.99575
2747	Cc1ccc(-c2csc(NC(=O)c3[nH]ncc3-c3ccccc3)n2)cc1	11	20.5631	206.796	6.28725	22	6	4	1	0	166.142	1252	8.24868	4.89947	4.47458	3.95577	3.31208	3.25544	2.96987	29.8095	29.4	21.4186	21.7912	21.8413	20.4915	256.05	224.602	197.603	209.171	209.058	157.912	145.065	148.032	151.846	157.401	160.101	160.01	159.682	156.072	38.9698	4.48602	-9.45225	26.8536	19.3956	-34.5802	-29.5344	-10.8098	8.26531	-2.72789
749	O=C(O)CNC(=O)c1ccc(NC(=S)Nc2cccc(F)c2)cc1	21	18.1842	170.711	6.01544	12	8	3	3	1	286.125	1266	10.0643	4.95906	4.84277	7.5296	3.63685	3.91104	3.87439	33.3158	29.2051	21.3	21.5065	19.6316	21.2264	246.431	201.707	199.97	198.938	196.331	163.645	149.725	152.359	160.779	163.13	161.108	158.641	159.047	160.553	16.7104	-26.8135	-71.2872	-32.4885	27.6504	30.394	-30.6901	-5.49646	1.20499	-7.49584
5	CC1OC(=N)C(=S)N1c1ccc(Cl)c(Cl)c1	41	12.3656	77.2842	4.81749	6	6	2	1	2	86.2188	1364	8.15226	1.34215	0.444444	3.59245	2.48261	2.40474	2.11111	56.8333	36.04	38.26	28.5106	42.0476	27.7143	282.982	251.01	201.292	187.142	180.502	158.286	146.155	152.732	157.6	151.924	155.266	162.556	168.967	175.982	29.9345	10.94	-60.9005	-43.7082	-10.8443	9.82167	7.84053	8.88512	5.8125	-1.1875
1936	CCCCCCCCCCCCCCCC(=O)N(C(=O)NC1CCCCC1)C1CCCCC1	14.9	24.1391	40105	11.7932	0	4	2	2	0	229.361	1324	2.98851	0.865306	0.681818	2.63633	2.22504	1.94728	1.69665	15.2184	18.2159	9.37984	9.92032	9.49388	8.26515	171.034	124.155	131.294	137.104	131.094	166.161	146.154	155.439	165.17	166.436	166.369	163.694	162.922	163.762	57.7943	53.7931	75.7895	55.5398	-56.7253	-94.937	-86.7776	-39.2723	7.73656	-1.12644
2470	Cc1c(C(N)=O)sc2nc(SCC(O)CN3CCOCC3)n(-c3ccccc3)c(=O)c12	12	24.2651	1374.13	8.35698	15	10	4	4	0	265.59	1744	7.72525	3.40379	3.67806	4.82891	3.4685	2.87609	3.02295	31.7091	29.7586	24.2344	23.5468	21.813	18.6496	230.404	208.386	188.677	192.034	192.922	161.857	147.087	154.794	157.158	158.029	161.923	159.301	154.546	157.205	58.3953	11.0908	7.59827	70.1037	-62.4128	12.3523	-62.8721	-57.891	13.885	6.89058
2310	Cc1cc(-c2nnc(S(C)(=O)=O)o2)c2ccccc2n1	13	15.9596	109.273	5.387	15	7	3	3	0	193.022	1074	10.5305	3.70833	4.15789	6.22651	3.58904	3.53627	4.97198	34.6452	37.0606	25.7143	23.4918	22.0625	21.6053	252.372	228.078	214.902	197.558	180.794	160.64	144.458	151.577	157.965	158.87	157.053	161.022	160.794	159.023	45.2156	72.5732	-44.4567	-38.9806	-62.206	-56.3592	-30.875	17.1615	6.81165	1.48179
3108	CCCC1(c2ccccc2)OC(c2ccccc2)=C(C#N)C1c1ccccc1	10	21.6353	289.661	6.69833	18	2	1	1	0	163.229	1072	6.39216	2.09945	1.2963	3.20057	2.84129	2.63858	2.22942	21.0196	23.7778	17.5118	18.2662	12.4917	9.32099	238.943	210.336	219.95	197.835	169.526	155.813	139.674	144.389	151.273	151.896	149.868	152.084	155.477	160.043	54.2722	45.89	58.7847	10.9127	-92.2964	-153.764	-122.374	-31.301	15.6667	11.5556
1470	CSc1ccc(OCc2nnc3sc(-c4ccc(N)cc4)nn23)cc1	16	19.7871	469.141	7.06719	20	8	5	1	0	132.785	1448	8.37222	5.60119	4.40881	3.31962	3.00784	3.22002	2.75297	36.2	33.1628	26.8312	21.125	25.4107	23.8302	257.314	233.384	185.451	212.258	223.83	159.64	147.413	150.48	154.66	157.811	159.986	162.257	161.838	158.947	53.4756	22.16	-31.2089	16.3111	71.6444	-9.78222	-70.76	-39.2578	9.62688	-0.831875
2028	COc1cc(-c2nc3sc4c(c3c(=O)n2-c2cc(=O)[nH]c(=O)[nH]2)CCCC4)cc(OC)c1OC	14	26.7938	393.433	7.19869	21	11	4	6	0	300.781	1686	9.86508	5.64935	5.10959	5.37109	4.29194	3.37097	3.46861	30.1071	29.7333	25.664	25.8676	22.2273	23.363	237.377	234.813	214.875	216.613	199.382	161.597	147.106	155.326	154.481	154.943	158.403	157.138	160.099	157.341	100.862	84.6497	82.2171	44.0272	-151.927	-13.7948	41.3889	-115.247	21	18.25
4480	COC(=O)c1c(C)nc(C)c2c1C(=O)C=C(N)C2=O	0	14.475	102.848	5.27511	6	6	2	4	0	237.25	834	10.7742	0.892857	0.12	7.65323	4.4881	3.49107	3.44	26.9032	27.25	27.5424	24.9014	8.80357	7.52	233.255	264.8	192.44	139.227	98.5203	162.31	147.054	154.319	152.163	154.323	158.054	166.338	172.768	171.679	71.4402	66.0385	-21.6753	-60.4901	-108.642	-76.9625	-36.7055	-33.5765	15.3621	9.83767
3818	Nc1ccc(Nc2ccccc2)c2c(=O)[nH]cnc12	7	14.9063	151.505	5.66247	16	5	4	1	0	147.167	776	8.70968	3.66	2.51351	4.74731	3.23977	3.2	3.27027	25.0323	26.8485	20.8955	19.1642	15.26	13.0541	241.674	216.487	192.469	181.656	168.304	162.082	150.389	150.646	157.034	162.145	160.658	161.372	162.549	165.382	20.4558	8.01145	2.62331	-4.2154	-39.0021	-37.5911	-13.6701	-41.2456	6.71384	-0.246618
4100	N#CCC(=O)Nc1scc(-c2ccc(Cl)cc2)c1C#N	4	14.9467	169.012	5.82312	11	6	3	1	1	188.898	1268	10.0018	6.0512	5.6	6.74634	4.72622	4.85269	5.68864	45.2857	35.4138	28.7273	30.5849	32.6176	27.36	293.75	254.138	240.611	233.138	226.352	155.326	141.556	143.555	152.287	151.449	151.149	155.3	162.433	160.338	14.8428	-17.512	-29.7326	9.4115	13.8468	-24.4332	-1.15986	-15.1255	3.61735	-2.43367
4228	C1=N\n2c(nnc2-c2cccnc2)SCCCCSc2nnc(-c3cccnc3)n2/N=C\c2ccccc2OCCCCOc2ccccc2/1	1	39.2745	779.847	8.26854	34	14	10	2	0	257.118	2460	8.0582	4.07859	3.58706	3.06093	2.60378	2.5865	2.48913	29.2857	29.3778	22.1789	21.3196	21.7561	19.7388	242.416	203.231	206.802	216.431	205.774	161.307	146.957	152.867	157.923	161.905	162.201	157.226	158.054	156.881	115.241	90.2132	102.163	-48.0857	-139.929	-170.682	-166.765	-176.994	14.6973	6.52721
3054	Cc1nc(-c2cc(-c3ccc(Cl)cc3)n(-c3ccc(F)cc3)n2)sc1-c1n[nH]c(=O)o1	10	24.9437	289.151	6.79835	27	10	5	2	2	248.287	1768	11.2738	6.00112	6.1507	5.64288	3.58785	3.22145	3.35812	40.1818	34.3125	29.8202	28.0111	25.9798	25.3793	277.843	250.779	247.185	240.96	225.77	160.744	146.83	150.776	156.752	156.248	155.375	154.857	157.914	155.481	52.7457	23.9248	-63.0119	-16.7478	-54.2064	-32.1184	23.945	0.284665	7.43802	-0.619318
2086	CCOC(=O)COC(Cn1nnc(-c2ccccc2)n1)c1ccc(Cl)cc1	14	20.644	315.684	6.74799	17	8	4	3	1	187.728	1380	8.51315	5.53914	4.68475	4.08103	3.27529	3.53928	3.14028	30	27.9375	20.0103	19.3684	21.3068	21.1279	233.996	193.228	175.392	186.74	195.684	162.87	147.964	155.715	160.649	161.444	167.104	166.778	162.084	159.859	61.5594	8.90457	-27.3452	-26.2127	-25.2174	-40.5934	0.468459	-0.681369	6.12571	-0.689036
2504	O=C(O)CNC(=O)c1ccc(NC(=S)NNC(=O)c2ccncc2)cc1	12	19.558	221.385	6.35542	12	10	5	4	0	287.375	1348	10.0108	5.08995	5.27273	7.00914	3.49133	3.86719	4.07559	32.878	29.4524	22.0476	21.122	22.0794	24.3818	241.986	201.738	188.692	189.229	193.05	163.605	152.52	155.404	159.914	162.85	164.019	161.965	161.805	161.688	16.6693	-29.0368	-64.5367	-58.6233	41.9869	25.3776	-10.7657	-27.5998	2.22249	-8.68471
2353	CC(C)(C)C(=O)Nc1nnc(-c2ccc(N3CCOCC3)c([N+](=O)[O-])c2)s1	13	21.0877	215.936	6.36823	11	10	5	4	0	277.927	1390	8.80093	5.64502	5.18239	5.79015	3.82324	4.58297	3.61967	28.9583	28.56	20.4685	17.3609	20.1039	24.9245	219.405	196.335	185.635	173.72	174.068	165.502	150.362	157.562	157.904	167.304	161.792	166.583	167.247	155.162	81.9772	36.7438	0.873264	50.7479	46.0623	-87.8418	-65.3092	-46.0731	10.855	-5.85764
4049	COc1ccc(N/N=C(\C#N)c2nc3cc(Cl)ccc3o2)cc1	5	17.7062	386.05	6.78887	15	7	4	2	1	155.255	1200	10.459	6.79545	5.59524	4.56633	4.0229	4.46998	3.49522	35.2941	31.2222	26.375	23.4127	26.7955	23.6667	265.535	234.606	206.132	227.414	230.071	160.201	147.025	152.264	157.538	162.217	161.686	157.994	164.746	163.279	40.2527	7.49045	-4.67166	3.73613	41.021	-2.55692	-78.2936	-46.5397	6.34948	-1.80277
2548	COc1ccc(/C=N/c2ccc(Nc3nc(Oc4ccc5c(C)cc(=O)oc5c4)nc(N(C)C)n3)cc2)cc1	12	30.7218	2740.41	9.27684	28	10	6	4	0	259.333	1620	9.2	5.74167	5.19084	3.98974	3.37257	3.13426	3.12532	24.9231	27.058	21.7803	18.3243	20.1583	18.5191	237.163	224.891	188.484	198.757	211.832	161.448	146.999	156.68	153.961	162.103	161.286	163.146	158.184	158.104	111.509	63.7188	-51.9226	-18.3804	-56.444	-62.2317	-62.3562	15.8618	15.1837	-1.07266
3447	CCCn1c(=O)n(C2CCN(C3CCc4cc(OC)c(OC)cc43)CC2)c2ccc(Cl)cc21	9	25.9773	405.872	7.19996	15	7	3	3	1	195.089	1596	6.30161	1.57944	1.98889	3.00136	2.19755	1.78216	1.93046	24.5538	24.6957	18.0059	16.4921	11.39	12.0235	213.68	193.071	165.311	151.638	133.712	162.65	146.015	156.593	158.24	158.32	159.518	160.671	163.6	167.076	103.333	71.1701	12.4776	-139.59	-223.359	-151.338	38.9194	59.2639	22.5607	12.8043
1593	COc1ccc(-[n+]2noc(O)c2CNc2nc3ccc([N+](=O)[O-])cc3s2)cc1	16	22.0463	220.429	6.42519	20	11	5	5	0	274.198	1447	11.3439	6.92647	6.16129	6.52852	3.94464	3.55746	3.85349	34.4524	33.0222	26.4524	23	23.3824	24.8871	250.721	231.779	194.789	194.296	199.041	162.741	150.95	153.898	157.518	162.249	161.256	162.909	163.2	160.947	45.1988	16.3794	-46.3651	-115.235	-8.65508	78.4056	74.9786	-55.9111	9.15646	-1.48299
1585	COc1ccc(Br)c(-c2nnc3n2NC(c2ccc(C)cc2)S3)c1	16	19.1085	218.398	6.26179	17	7	4	1	1	114.276	2368	8.03876	3.48447	3.15226	2.93016	2.72202	2.51474	2.46571	60.7179	34.2143	31.3333	27.6136	25.0645	23.963	260.407	241.841	200.063	227.734	204.18	159.143	146.597	152.087	151.065	158.236	162.711	157.574	161.491	158.626	53.6781	5.94345	-19.0306	17.628	28.11	-18.0796	-63.1597	-76.0832	11.1598	1.3432
3240	N#CC1=C(N)OC(c2ccc(Cl)cc2)=CC1c1c(-c2ccccc2)[nH]c2ccccc12	10	24.644	362	7.02305	21	5	3	1	1	182.116	1454	8.11439	4.35676	3.51936	3.71666	3.13938	3.14924	3.13209	29.6735	28.0189	21.9913	20.7951	18.3197	17.1515	265.74	239.095	230.36	228.475	204.209	155.357	142.403	142.957	149.615	152.645	152.15	151.219	154.605	159.112	35.1525	6.32943	-17.1482	-26.3107	6.5846	7.75729	-65.61	-87.0269	11.4523	0.867555
3797	N#Cc1c(-c2c(-c3ccccc3)[nH]c3ccccc23)[nH]c(=S)[nH]c1=S	7	19.7347	199.269	6.21094	21	6	4	0	0	137.361	1404	8.51051	3.29787	1.98649	3.71245	3.18868	2.91411	2.69269	37.9459	31.125	25.8333	28.6941	22.2447	18.5676	286.125	254.458	256.276	254.426	210.606	153.722	143.976	143.551	148.549	151.438	150.916	149.624	152.859	158.918	21.1193	1.13384	21.716	2.39542	-24.1474	-69.1648	-64.0995	-4.44745	7.99781	2.92622
3953	COc1ccc(C2CC(=NOC(=O)c3cc(O)cc(O)c3)CC(c3ccc(OC)cc3)N2C)cc1	5	27.1054	547.568	7.55825	18	8	2	6	0	287.806	1482	8.19048	4.35135	4.18421	4.56834	2.81394	2.90053	2.99598	23.5238	25.4545	19.4965	16.0872	17.0203	17.1316	223.655	210.836	164.745	166.821	185.101	160.894	145.465	152.925	153.85	158.159	160.481	161.353	158.543	157.884	77	-18	-88	-6	97	-13	-42	-44	15.6039	-5.55933
1096	Cc1ccc(/C=C(/NC(=O)c2ccccc2)C(=O)NC(CS)C(=O)N(C(=O)NC2CCCCC2)C2CCCCC2)cc1	18.4	32.1241	613.886	7.85489	12	9	4	4	0	358.61	1938	6.03939	3.14843	2.67199	4.26917	3.39003	3.05371	2.77835	23.0714	23.5287	15.2788	15.7039	16.6491	15.6473	210.919	166.378	177.943	192.169	175.936	162.439	145.817	152.42	160.743	164.519	164.148	159.542	159.456	159.278	97.133	96.6265	97.19	53.8351	-35.8639	-160.88	-62.9495	-14.4718	12.4082	-4.44898
2271	O=C1CSC(c2cc3ccccc3nc2Cl)N1c1ccccc1	13	18.3609	164.406	5.93525	16	5	2	1	1	137.925	1368	7.94582	3.82011	3.39869	3.83126	2.94068	2.62953	2.8176	38	31.8462	26.1951	28.2289	20.5714	17.3333	273.088	238.774	237.113	211.579	203.613	154.712	140.95	145.516	151.883	154.614	150.579	155.578	155.376	155.286	31.519	-1.52233	-43.9107	-25.6197	-21.1745	1.12148	3.31139	-19.2721	6.41898	0.596451
489	CC(O)(Cc1cn(Cc2ccccc2)nn1)c1ccc(S(=O)(=O)c2ccccc2)cc1	23	24.4925	504.236	7.35445	23	7	3	3	0	263.056	1482	7.63786	4.11905	3.16172	4.87142	2.53381	3.65064	3.14916	27.4444	30.2456	20.5312	16.9521	18.5204	16.0396	238.06	208.574	177.956	171.816	189.477	159.14	143.495	148.424	152.671	160.244	160.715	162.418	157.119	160.629	18.5821	3.26017	-41.5927	-9.36778	-24.5668	-33.162	-1.44231	-85.2635	8.59362	-11.856
413	CCC1[C@@H]2c3c(c4ccccc4n(C)c3=O)OC(C)(C)[C@H]2CN1OS(=O)(=O)c1ccc(C)cc1	24	27.3063	624.556	7.66082	16	8	2	5	0	292.445	1640	7.35069	2.3304	2.3873	4.56946	3.13654	3.06173	2.87806	25.625	28.9706	21.0533	18.4471	14.4581	12.1143	220.458	209.922	175.398	179.576	155.73	160.957	143.819	153.057	153.971	158.422	160.264	157.688	161.101	163.779	83.0069	124.342	15.3767	-17.0139	-129.556	-258.486	-186.398	84.3229	23.7227	9.14551
187	O=C(O)CNC(=O)c1ccc(NC(=S)N/N=C2/CCc3ccccc32)cc1	28	20.8223	1273.52	8.14279	12	8	4	3	0	242.403	1346	8.49877	4.48039	4.49462	5.38672	3.05041	3.37559	3.26658	29.9111	27.7021	19.78	19.0526	21.0588	22.4516	240.567	197.393	176.838	184.738	196.799	161.028	148.383	151.025	158.115	160.849	162.134	162.003	159.931	156.666	32.5995	-13.1742	-71.9781	-65.1742	49.8642	36.9959	-28.1372	-22.3923	4.86025	-6.41383
4119	C/C(=N\N=C1\N=C(c2cc3ccccc3o2)CS1)c1[nH]c(-c2ccccc2)nc1C	4	24.0582	327.656	6.89058	20	7	5	1	0	151.948	1412	8.3356	3.86594	3.72031	3.10098	2.6619	2.5211	2.436	28.8163	29.1321	22.101	21.2079	20.3913	16.1264	252.27	220.522	197.581	207.606	194.01	158.749	144.85	149.55	156.572	160.911	160.042	157.907	156.389	163.374	79.5208	45.1297	-76.2536	-101.117	-31.5665	-12.554	3.61002	49.903	12.3444	0.282382
3835	CCCCCCCCCCCCO[C@@H]1C[C@H](O)[C@@H](O)[C@H](C)O1	6.4	15.8036	8122.65	9.79087	0	4	0	4	0	174.611	940	3.58621	0.760331	0.77193	3.01054	1.69271	1.77204	1.79094	16.2069	18.6897	10.3333	9.25	8.18182	8.14035	165.653	122.711	108.66	112.479	112.291	166.916	146.988	156.782	165.481	166.463	167.461	165.828	165.995	166.458	30.3103	13.6159	24.1891	-7.95244	-10.3448	-0.813317	-6.0975	-5.17479	5.48276	-3.71344
3103	Cc1c(CNC(=O)CCc2cn(C)c3ccc(Cl)cc23)c2cc(OC(F)(F)F)ccc2n1C	10	26.156	790.256	7.86628	18	9	3	2	4	368.401	1694	9.6358	4.82854	4.03466	6.57859	3.09493	3.77238	4.46769	30.25	27.7797	21.1371	17.9527	19.181	19.5413	233.521	224.262	159.823	153.013	174.408	167.493	148.015	160.338	153.622	156.87	164.771	167.503	166.523	169.591	96.2502	116.805	-129.652	-107.197	96.3275	151.707	-4.00857	-131.107	12.6515	3.97417
3778	CCOC(=O)C[n+]1c(Br)c(Br)n(C)c1-c1ccccc1	7	15.0442	184.721	5.91199	11	6	2	2	2	131.684	3195	7.08956	1.77083	1.22798	3.76241	2.47425	2.85482	2.48333	91.2857	35.1667	51.625	33.0411	27.0312	19.9333	249.192	227.682	213.704	179.145	169.654	160.611	146.467	157.826	156.508	156.563	156.797	160.632	161.651	160.282	52.2055	15.465	-55.1774	-37.8489	6.34222	-10.0659	-88.9998	-37.0772	11.1094	6.58694
1342	O=C(NCCn1c(-c2ccccc2)nc2ccc([N+](=O)[O-])cc2c1=O)NC1CCCCC1	17	24.9437	1567.24	8.52022	16	9	5	4	0	333.25	1354	8.35088	4.13971	3.65649	5.84649	4.23611	3.31189	2.90691	23.7544	25.6	16.8456	16.5503	15.5662	14.4275	221.055	179.275	185.456	186.359	166.28	163.811	148.648	154.137	161.561	165.643	164.121	160.21	161.662	165.299	72.6177	98.5691	86.3238	-17.2902	-40.0317	30.8793	88.3604	56.9157	8.33333	1.11111
3280	N#Cc1c(-c2ccccc2)nc(SCOCc2ccccc2)[nH]c1=O	10	19.08	759.139	7.54848	18	6	3	2	0	195.337	1230	8.71111	4.26984	4.59649	4.88342	3.66315	3.2644	3.49886	30.75	29.7381	22.6463	22.4048	20.127	17.3684	256.814	223.221	217.591	205.956	192.042	157.37	143.059	148.105	151.518	160.397	154.998	158.21	156.914	162.672	27.3661	-14.2269	40.905	53.36	-27.6589	-52.6503	-13.2925	-30.5631	5.45125	-0.583125
4474	CCOC(=O)C1C(=O)C=C(c2ccccc2)CC1c1ccc(OC)cc1	0	19.8156	230.858	6.39731	12	4	0	4	0	217.222	1070	7.45833	3.63158	3.30841	4.52546	3.19643	3.20127	3.03505	22.2917	24.24	17.8125	17.6417	15.2982	13.9533	226.391	205.912	179.827	178.395	175.238	158.322	141.565	149.154	152.455	152.634	156.534	156.82	157.021	158.539	55.5312	-1.78125	-44.375	-9.875	-7.1875	-38.4062	-49.5938	43.9219	11.7812	2.46875
212	O=S(=O)(/C=C/S(=O)(=O)c1ccc(Cl)cc1)Cc1nnc(CS(=O)(=O)Nc2ccc(Cl)cc2)s1	27	25.8594	274.388	6.80847	17	15	3	6	2	398.774	2796	9.97891	4.38076	7.95062	8.30778	3.95993	4.13149	6.66381	58.25	51.24	34.0463	36.9029	38.9756	34.3067	281.519	226.041	223.195	221.494	228.255	157.669	141.024	146.978	156.172	157.965	158.446	156.404	158.186	159.918	-41.7376	39.8392	-80.6391	-82.2956	133.006	5.21995	-127.485	110.292	-5.01997	-11.901
3655	CCN(CC)C(=O)n1c(=O)n(C2CCN(C3CCc4cc(OC)c(OC)cc43)CC2)c2ccc(Cl)cc21	8	28.8343	588.696	7.68624	15	9	4	4	1	257.866	1784	6.77229	1.81714	2.08333	3.58148	2.55696	2.23806	2.15565	24.7778	24.9474	18.8907	17.8756	13.2466	13.92	212.35	196.422	165.096	160.331	148.34	163.573	147.089	158.367	159.059	158.552	161.543	161.188	163.473	163.933	127.159	107.434	45.0348	-70.6298	-195.109	-230.566	-176.125	-29.9563	27.0625	15.8125
3782	CCCCNc1ccc(-c2nn3cc(-c4ccc(OC)cc4)nc3s2)cc1[N+](=O)[O-]	7	23.3511	588.124	7.47555	20	9	5	3	0	246.67	1470	8.67538	5.67073	4.73504	4.83667	3.32838	3.49928	3.84805	28.8235	28.8889	21.5545	20.1416	21.9024	21.0128	235.473	208.206	184.614	190.111	201.92	162.075	148.125	153.756	157.587	159.646	162.671	162.454	159.574	161.229	79.7746	71.8905	59.1672	34.9853	19.6607	-28.0818	-13.5988	-58.4406	13.3772	8.04844
2422	C/C=C/C(=O)C[C@H]1C(=O)C=C[C@@]1(O)CCCC[C@@H]1CCC(=O)O1	12	17.3556	476.79	6.99998	0	5	0	5	0	268.451	992	6.7234	2.14	2.34409	5.71173	2.80148	2.90597	3.03614	21.1064	22.5417	13.544	12.568	12.62	12.4516	201.091	154.729	143.333	142.543	144.566	162.714	143.945	151.234	160.581	161.549	162.912	162.385	161.829	162.726	53.3712	18.6333	-73.5989	-30.1734	13.1833	-64.0063	-41.6451	-61.9031	6.7723	-4.54233
2704	COc1ccc(C2CC(=NOC(=O)c3cccc(Cl)c3)CC(c3ccc(OC)cc3)N2C)cc1	11	26.2889	562.404	7.556	18	7	2	4	1	217.839	1642	7.53451	4.1309	3.95407	3.57113	2.61203	2.7958	2.83543	26.918	26.1875	20.0863	16.561	17.2397	17.44	231.646	213.076	166.544	171.295	186.249	159.814	144.106	152.783	153.631	157.482	160.213	160.268	157.956	157.847	78.135	-16.9513	-72.3639	-45.6039	54.9436	-23.1458	-43.4799	-27.2606	14.5195	-5.52432
2004	CC1=NN(c2cc(S(=O)(=O)O)ccc2Cl)C(=O)C1/N=N/c1[nH]nc2nc3cc4ccccc4cc3cc12	14	30.0778	347.328	7.1586	23	13	7	4	1	335.277	2024	11.1707	7.6499	6.46714	6.32598	4.14052	4.9374	4.1878	38.1887	36.5172	28.2689	25.1532	25.6698	23.129	270.401	247.608	229.202	233.427	210.93	160.334	146.819	150.673	156.529	160.929	159.704	159.988	163.475	164.115	27.5437	58.1922	-23.3553	-59.2528	-29.9648	-26.5726	34.4696	-37.1914	8.57351	-5.03382
4258	Nn1c(SCCSc2nnc(-c3cccnc3)n2N)nnc1-c1cccnc1	0	21.8964	202.181	6.33878	22	12	10	0	0	164.007	1594	8.97475	3.9596	5.0625	3.72743	2.37272	2.35653	2.86516	36.2273	33.617	30.0941	23.3636	21.0303	22.625	247.734	225.466	199.866	179.765	187.283	166.238	155.282	157.596	157.186	168.872	169.002	165.773	159.567	164.989	56.492	45.1318	-3.43136	-130.202	-155.613	-47.0432	63.4192	67.7309	10.8822	0.27686
4016	CCN(CC)c1ccc(/C=C/C(=O)c2cc(C(=O)/C=C/c3ccc(N(CC)CC)cc3)c(OC)cc2OC)cc1	5	29.6746	1043.66	8.33678	18	6	2	4	0	287.278	1618	6.275	3.6	3.7205	3.59097	2.98072	2.88958	2.88751	20.225	22.6829	17.5145	16.3711	15.4625	15.354	212.439	202.173	156.951	146.91	182.176	160.9	144.277	155.129	156.297	151.896	157.769	162.839	155.866	156.088	124.531	63.4375	-6.17188	-6.96875	89.2969	67.0469	-2.5	0.390625	25.105	6.05
703	Cc1cc2nc(-c3ccc(O)c(C(=O)N[C@@H](C)C(=O)N[C@H](C(=O)N[C@@H](C)C(=O)O)C(C)C)c3)[nH]c2cc1C	21	29.233	2589.83	9.19435	15	11	5	6	0	419.444	1634	7.91549	3.50256	3.34021	5.90767	3.60069	3.53732	3.72423	23.0141	24.3562	18.8855	16.0308	14.8462	13.6907	210.924	193.492	166.331	177.678	159.164	164.713	149.246	155.298	159.261	164.879	165.216	161.16	163.367	165.899	114.521	103.167	-55.9554	-88.0581	-21.052	-83.1938	-3.66376	70.6812	19.8689	-5.73973
2690	COc1ccc(-c2ccc(C3CC(c4ccc(OC)c(OC)c4)=NN3c3nc(-c4ccc([N+](=O)[O-])cc4)cs3)o2)c([N+](=O)[O-])c1	11	35.3885	708.018	8.06655	28	14	5	8	0	432.115	2154	10.8921	6.14375	5.94675	6.17306	3.22353	3.46933	3.22394	30.7714	30.68	25.3082	24.3772	22.95	23.284	249.294	240.397	199.119	206.782	217.027	160.01	146.492	151.778	153.593	154.993	159.055	157.296	158.448	156.677	102.311	27.8267	-99.8711	-116.098	32.9733	46.5778	-60.4	-55.1733	19.801	2.90816
3697	O=c1[nH]cnc2nc(-c3ccccc3)cc(-c3c(-c4ccccc4)[nH]c4ccc(Cl)cc34)c12	8	26.7249	380.421	7.1352	31	6	4	1	1	191.644	1538	8.9121	5.59333	4.11036	3.83288	3.23206	3.24156	3.21515	30.76	29.0545	23.2845	23.4322	23.0267	21.6554	273.14	248.041	256.286	256.299	233.316	155.312	142.745	145.008	150.085	152.298	150.652	149.388	152.511	158.152	35.4765	16.5872	33.7141	26.8879	3.29778	-13.1951	-104.007	-165.179	10.458	4.5244
1281	Cn1ncc2c(NCc3ccc(F)cc3)ncnc21	18	14.9467	229.163	6.07629	15	6	5	0	1	157.389	806	9.80645	5.58974	4.7381	5.07706	3.17222	3.26353	3.26455	26	27.697	20.8254	16.6923	19.5897	16.1667	234.592	207.877	161.575	172.848	210.28	168.616	152.433	161.339	161.787	168.586	163.873	173.089	157.595	168.832	41.7242	0.909469	-57.3153	-55.8491	-4.12591	-37.5068	1.02601	19.1124	6.45578	-2.40375
3366	N#Cc1[nH]/c(=N/c2nc3ccccc3[nH]2)[nH]c1N	9	14.1706	99.6557	5.18951	14	7	7	0	0	136.667	748	10.3704	6.56667	3.93939	5.06173	3.63981	4.22778	3.11111	27.7037	29.3448	21.8113	19.7755	22.3667	15.0606	245.987	206.317	180.239	222.978	217.988	168.062	157.895	157.956	166.555	170.653	177.38	160.337	167.194	162.139	19.7023	17.1358	-31.203	-6.60768	-25.2853	-7.13169	-31.7243	-3.37449	4.92044	-2.60494
2632	Cc1c(C(=O)OCC#CCN2CCN(c3ccc(Br)cc3C#N)CC2)sc2ncnc(N3CCOCC3)c12	12	29.7031	14454.8	10.9138	15	11	6	3	1	254.304	2966	8.11556	2.98906	3.65074	3.91237	2.81289	2.59309	2.98503	45.6308	30.6087	24.1656	20.8166	17.9195	19.7477	241.284	215.088	179.437	182.193	152.963	161.337	146.297	158.338	156.384	156.638	161.725	156.638	165.272	163.35	80.2737	-15.3523	-23.5156	-6.81409	-92.7754	-22.0178	34.1541	-69.9443	14.4802	3.33183
2586	CCCCc1nc(Cl)c(-c2cc(-c3cccc(Br)n3)nc3c2C(=O)c2ccccc2-3)n1Cc1ccccc1	12	30.2889	754.277	7.96076	29	7	4	1	2	208.056	2914	7.72052	4.74835	3.70463	3.35574	2.95259	2.7796	2.67812	47	29.8209	23.9932	24.2418	25.3243	24.1244	262.453	228.004	239.715	254.111	233.82	156.561	141.953	148.106	154.093	155.494	154.696	151.448	151.722	154.275	86.6775	90.0238	101.985	58.4299	43.2563	-46.4748	-101.526	-147.829	16.9001	16.3933
3284	CCCCCCCCCCCCCCCC1CC(=O)NCCCNCCCCN(C)CCCN1C	10	25.0365	6731.03	10.0672	0	5	4	1	0	204.306	1402	2.53608	0.866873	0.912281	2.10624	1.7892	1.72188	1.71248	14.4536	17.5876	9.14391	8.81	8.94737	8.73099	163.117	125.316	118.04	118.314	121.579	168.032	148.615	160.157	165.135	165.834	165.994	167.585	166.45	166.361	37.4124	-39.5331	-8.87469	37.9555	21.1707	-25.4405	-24.2087	15.9779	6	-10.3314
232	CCOC(=O)c1cnn(-c2nc(-c3ccccc3F)c(C#N)c(=O)n2C)c1N	26.25	21.3558	254.342	6.5683	17	10	6	3	1	328.75	1230	11.6744	5.52577	5.4878	7.64535	5.73425	4.30069	5.31843	28.6047	29.1333	26.4828	26.6129	19.0309	19.1707	241.294	234.733	227.665	207.495	180.513	167.056	151.52	159.227	160.986	167.745	161.875	165.511	167.567	168.67	82.8242	99.4332	27.1563	-73.6966	-115.853	-25.3039	-32.7226	-82.4392	16.7123	8.80043
1744	Cc1cccc2c3nn4c(-c5ccccc5)nnc4sc-3cc12	15.3	18.9182	202.717	6.14472	22	5	4	0	0	105.642	1112	8.86984	5.13043	3.76744	3.01835	2.68519	2.79791	2.72825	31.7714	31.2821	27.1842	22.8571	22.2609	17.814	273.324	252.013	214.4	233.651	242.385	155.817	143.432	146.407	149.883	155.671	160.383	156.616	152.1	150.968	48.5493	35.1316	18.1255	-2.84825	-20.5865	-23.8249	-82.0132	-85.9046	10.7665	4.12163
2872	Cc1ccc(-c2nnc(S)n2NC(=O)CN(C(C)C)C(C)C)cc1	10.13	18.2412	230.192	6.31438	11	7	5	1	0	163.499	1202	6.02671	2.75368	1.84802	3.33672	2.75248	2.57574	2.65092	24.5306	24.14	18.2477	14.4887	18.2289	19.3103	204.217	183.009	140.436	131.248	180.486	165.866	150.208	160.056	162.51	162.478	166.739	173.763	165.948	158.003	97.3282	58.1343	-4.89114	73.523	67.685	-53.055	-73.352	-171.881	14.0979	0.0254061
3307	Cc1cccc(OCc2ccccc2-c2nc(-c3cccc(Br)c3)cs2)c1	10	21.3107	317.743	6.7545	23	4	1	1	1	121.276	2440	6.92248	3.90406	3.42919	2.69503	2.36327	2.34958	2.4532	54.2222	31.625	24.9263	23.84	20.6386	22.6588	268.006	230.726	207.853	229.266	217.988	153.075	139.017	144.223	148.44	153.45	154.921	148.423	149.996	148.673	37.0356	-15.4303	-29.5225	-10.0605	-14.6996	2.96205	-3.95876	-42.447	7.68	-2.72
3732	O=C1NC(=S)/C(=C/c2cccc(F)c2)S1	7	11.6014	73.0567	4.6967	6	5	1	1	1	161.239	1072	10.8042	6.77193	6.66667	7.67807	3.79527	5.67057	10.3848	51.0476	37.9545	31.85	28.2727	32.2105	19.2222	297.713	242.456	245.613	246.965	194.929	156.779	142.328	144.269	151.41	155.926	155.249	152.609	167.147	182.489	4.66163	-29.7322	-7.68833	-2.74301	-7.3424	-0.702948	0.634417	-0.468632	-0.0589569	-3.00454
829	CCOC(=O)c1cc(C(=O)c2ccc(F)cc2)n2ncccc12	20	17.7632	210.955	6.18455	15	6	2	3	1	257.944	996	11	4.35294	3.96774	7.16512	5.17619	3.50327	3.99373	27.6667	28.2895	22.9333	23.8592	17.5441	15.7742	247.687	223.013	224.121	208.391	188.99	162.273	145.555	152.146	159.336	158.315	155.73	158.987	159.404	163.546	55.5	46	-3.75	-69.75	-48.25	-23	-64	-41.5	9.375	5.875
3014	O=C(NC(=S)Nc1cccc([N+](=O)[O-])c1)c1cn(CCO)c2c(cc(O)c3ncccc32)c1=O	10	26.4553	1820.31	8.73054	20	12	5	6	0	401.014	1694	11.1852	6.07738	5.72281	7.86301	4.24896	5.35337	4.50016	33.2157	30.5185	24.9569	25.5323	23.8304	21.6737	254.068	234.671	221.931	193.88	189.981	160.967	149.159	151.133	155.706	158.428	155.389	160.906	162.645	162.693	32.9017	18.8902	29.9138	-34.8864	-71.2197	-87.7539	-33.7917	-15.2913	10.316	3.49827
398	CCC1[C@@H]2c3c(c4ccccc4n(C)c3=O)OC(c3ccccc3)[C@H]2CN1OS(=O)(=O)c1ccc(C)cc1	24	30.5047	701.554	7.8883	22	8	2	5	0	307.438	1784	7.68301	3.4875	3.44733	4.52115	3.0537	3.07629	3.07288	26.2353	29.4521	21.2303	19.7778	17.1	16.0952	232.403	212.914	194.751	191.313	180.493	158.947	142.653	150.641	153.152	157.239	156.854	156.7	157.73	158.294	61.4033	100.335	46.8793	-50.8051	-98.1549	-176.479	-177.89	80.0027	20.9619	9.68512
828	Cc1ccc(C(=O)C[n+]2ccccn2)cc1	20	12.1992	78.3283	4.83091	12	3	2	1	0	120.361	643	6.96552	2.57143	1.47059	4.15038	3.34535	3.02381	1.98039	22.1724	24.4333	16.8833	13.8333	14.0571	9.79412	228.029	192.73	153.457	190.05	178.173	160.696	145.589	153.129	157.045	159.808	164.578	159.998	156.484	164.711	28.4328	-16.2402	-42.2378	13.4174	29.1082	-31.6409	-47.4721	4.02616	4.04043	-5.12247
2926	CCCCCCCCCCCCCCCC1CC(=O)NCCCN(C)CCCCN(C)CCCN1	10	25.0769	3501.75	9.41378	0	5	4	1	0	204.306	1402	2.53608	0.895899	0.977987	2.10624	1.73095	1.72397	1.83019	14.4536	17.5876	9.05166	8.62667	8.99685	9.30189	163.117	124.486	118.291	116.761	119.767	168.032	148.615	160.157	165.114	166.451	165.964	167.274	167.925	164.946	36.4124	-42.5331	-9.67882	32.4812	19.2771	14.2971	-22.9763	-13.4119	5	-11.3314
1610	CC(=O)Nc1cccc(OCc2cc(=O)oc3ccc(C)cc23)c1	16	18.7415	373.372	6.79804	16	5	1	4	0	210.222	1006	8.92683	3.79221	4.60317	5.12737	3.26528	2.92857	3.52998	24.5366	26.1163	19.8372	17.2043	15.2857	17.5397	236.198	216.017	183.249	180.686	172.691	158.677	143.658	150.188	153.405	156.035	157.458	157.1	159.945	156.106	59.1404	8.05711	-70.0607	5.62582	-37.4081	-4.18917	-3.61927	-55.0898	7.3718	-0.764426
1633	O=c1[nH]occ1-n1c(/C=C/c2ccccc2)nc2sc3c(c2c1=O)CCCC3	16	22.5227	545.439	7.33121	20	7	3	3	0	212.92	1368	9.0321	5.28839	4.08333	4.73156	3.50487	3.21036	3.22087	30.4	29.9388	22.4815	23.3905	25.618	19.8021	253.293	217.581	216.89	227.488	233.995	157.86	144.014	148.377	154.615	153.875	158.13	157.48	151.688	153.409	55.8519	56.3394	105.372	61.2798	7.03034	-135.575	-115.222	-92.4925	10.16	6.96
4330	COc1c2occc2cc2ccc(=O)oc12	0	12.6756	82.4167	4.88179	13	4	0	4	0	134.417	696	11.9167	1.28571	0	5.60069	3.69737	2.92262	3	29	30	26.4348	24.4348	6.78571	3.33333	258.185	250.856	198.875	158.249	81.6635	155.945	142.043	149.234	149.459	151.753	157.239	156.275	173.616	185.007	36.2222	16	-0.222222	-43.8889	-99.1111	-36.4444	59.1111	10.6667	7.55556	4.5
1588	Nn1c(CS(=O)(=O)Nc2ccccc2)nnc1CS(=O)(=O)c1c[nH]cc1S(=O)(=O)c1ccccc1	16	27.6268	938.176	8.0967	22	15	6	6	0	433.982	2186	9.91515	4.83333	6.46061	7.89058	4.09172	4.04403	5.94732	39.7455	42.8966	29.7953	31.2015	26.3051	23.3273	248.01	217.274	202.1	193.81	192.659	162.48	147.319	151.614	157.978	162.243	162.821	162.066	164.918	165.742	-29.3272	55.945	-95.2135	19.7221	120.417	-86.5954	-133.392	74.5455	5.83074	-4.35934
4407	Cc1ccc2nc(Nc3ncccc3C(=O)N3CCNC(Cl)C3Cl)sc2c1	0	21.4081	178.74	6.17918	15	9	5	1	2	160.042	1808	7.67396	4.29542	3.36481	3.63731	2.906	2.6741	2.49438	41.0909	32.2128	28.1961	24.9515	24.4941	24.5375	254.305	220.164	214.737	219.297	207.12	161.618	147.791	155.706	158.451	161.348	159.155	160.477	161.664	158.92	45.9109	14.263	10.7433	0.294995	-9.10833	-71.1847	-17.4383	-15.613	7.9375	-0.6875
3874	CN(C)c1ccc(/C=C(\C#N)C(=O)Nc2scc(-c3ccc(Cl)cc3)c2C#N)cc1	6	22.8628	513.666	7.34019	17	7	4	1	1	235.981	1650	8.42658	6.41058	5.98529	5.02087	4.14912	4.21707	4.09305	35.1064	30.5102	24.6598	22.0364	29.0429	25.7353	267.228	245.129	204.29	214.597	239.838	156.719	142.624	148.61	148.633	154.823	155.466	158.839	155.785	155.534	48.3609	0.631653	-9.2709	37.5375	84.316	7.06242	-3.6153	16.8289	11.0254	-5.64962
3728	Cc1ccc(NS(=O)(=O)c2ccc(NC(=O)c3cn(CCO)c4c(cc(Cl)c5ncccc54)c3=O)cc2)cc1	7	30.7759	3199.69	9.43179	26	11	4	5	1	376.249	2092	9.19434	4.73103	4.64583	6.06854	4.00816	4.12957	4.18132	33.7419	32.7273	25.4138	23.8924	21.3379	19.6953	253.699	233.511	211.518	207.536	190.153	158.888	144.41	149.93	153.639	157.412	156.08	157.4	159.696	160.789	26.7617	43.9912	18.2141	28.1023	-67.9886	-95.1793	-31.0396	-35.6852	13.0083	1.58377
839	Cc1ccc(OCc2ccccc2-c2nc(-c3cc(Cl)sc3S(N)(=O)=O)cs2)cc1	20	23.8067	743.133	7.70949	22	9	2	3	1	226.256	2120	8.14762	4.49931	4.10012	4.81396	2.85058	2.5765	2.71646	45.1064	39.08	29.433	28.8269	24.6667	25.6703	273.455	243.686	214.796	229.213	238.097	154.793	140.481	145.612	148.85	151.776	156.552	152.761	146.815	150.652	8.12734	35.8736	-81.3938	34.3057	16.2555	-49.968	-2.95134	16.8648	7.61114	-0.338162
2717	Cc1ccccc1-c1nc2ccccc2c(=O)n1C(=O)CCC(N)C(=O)O	11	20.8389	354.793	6.86479	16	7	3	4	0	295.5	1142	8.91304	3.85088	3.39316	6.42391	4.69524	3.86404	3.63295	24.8261	25.9583	20.4393	19.5398	16.807	13.6496	231.662	208.428	199.999	214.879	189.615	161.41	146.559	151.151	157.239	161.678	162.142	154.816	155.119	160.133	58.2779	66.0718	14.5406	-42.8866	-83.1815	-142.607	-152.682	62.9735	12.104	1.52836
2067	O=C(COC(Cn1nnnc1Cc1ccccc1)c1ccc(Cl)cc1)NNC(=S)Nc1ccc(Cl)cc1	14	28.641	1505.66	8.62532	23	12	7	2	2	222.052	2228	8.12757	5.00802	4.82343	3.70087	3.19457	3.27168	3.29925	37.1333	30.2063	22.0075	19.3714	22.8806	21.9767	250.726	203.672	188.14	196.86	193.428	161.937	149.697	153.31	159.012	162.264	164.187	164.588	164.664	163.346	43.936	-54.4347	-62.5804	10.4488	60.9235	-47.8659	-29.6774	-2.71802	3.19083	-12.4314
153	CCn1cc(C2NNC(=S)N2c2nc3ccccc3[nH]c2=O)c(=O)c2ccc(C)nc21	29	24.7819	260.506	6.69403	20	10	7	2	0	231.236	1502	9.16889	4.43609	4.0625	4.62472	3.42206	3.32841	2.80961	30.04	28.8519	24.2881	23.6694	19.1203	19.0536	244.344	225.493	214.238	200.237	178.433	162.661	150.448	156.687	158.775	160.719	160.211	160.19	164.537	162.304	77.07	68.6732	26.4041	-30.6597	-88.6139	-99.5591	16.9623	36.7212	15.8136	7.5328
2991	Cc1ccc(OCc2ccccc2-c2nn(CNc3cc(C)ccc3Cl)c(=S)o2)cc1	10	24.3174	431.516	7.19871	23	7	3	2	1	150.741	1706	7.39716	4.30061	3.71581	2.84417	2.62235	2.60793	2.56184	32.1887	28.1071	22.8938	18.608	25.5243	18.7788	247.391	218.674	187.324	218.931	215.28	158.328	144.791	151.937	152.597	158.681	162.175	156.168	153.828	159.639	68.7997	7.18678	-46.8383	-1.04796	11.016	-7.17764	4.36572	-31.2352	10.4998	-4.63759
466	CCOC(=O)C1=C(C)N=c2s/c(=C\c3ccc(O)c(OC)c3)c(=O)n2C1c1ccc(SC)cc1	23	26.2365	574.008	7.57642	17	9	2	5	0	278.924	1854	8.36015	4.01142	3.35556	4.80903	3.64287	3.06103	2.86065	31.9655	30.0328	26.1333	24	20.6507	22.0071	243.036	242.605	211.293	205.591	193.493	158.143	143.082	151.201	150.091	152.723	155.209	155.114	157.679	155.753	93.764	78.9964	-1.84463	-33.5018	-35.4906	-69.3909	-38.0416	-17.3207	21.6338	13.2723
3486	c1ccc2cc(COc3cccc4cccnc34)c(COc3cccc4cccnc34)cc2c1	8.2	27.3345	285.825	6.87915	30	4	2	2	0	168.778	1328	8.07143	5.02326	5.23077	3.01389	2.5	2.56245	2.76496	23.7143	26.3607	20.3203	17.5821	17.7674	18.8154	255.514	228.72	187.977	203.384	208.121	154.739	140.448	145.519	149.826	153.442	156.964	151.884	153.756	152.186	44.2449	-23.9592	-14.2449	-78.6939	-64.4286	29.0612	57.4898	-21.6327	10.5153	-3.26531
4476	COc1ccc(C(=O)/C=C/c2ccccc2)cc1OC	0	14.8778	176.127	5.86435	12	3	0	3	0	151.389	820	7.77778	3.12281	3.14583	4.20525	3.23611	3.13938	2.91667	22.7778	24.6486	19.6471	16.5972	14.2807	14.3542	231.842	217.577	167.448	167.768	168.371	157.515	141.767	150.268	150.097	153.425	158.578	157.663	159.342	155.628	40.3364	-11.3735	-21.679	-55.4444	-6.3858	21.9198	-26.4907	-31.1296	8.70679	-1.29938
708	COC(=O)CCCSc1nnc(-c2cccc(-c3ccccc3OC)c2)o1	21	20.4942	728.424	7.58414	17	7	2	4	0	190.365	1350	8.34988	5.10196	4.87745	4.05031	2.61488	3.14343	3.23974	28.7234	28.4286	21.4086	19.6429	19.0118	20.6912	234.915	213.063	190.98	181.724	174.535	159.699	144.148	152.206	152.462	156.409	158.198	158.366	161.34	158.739	74.5583	44.0328	-28.9576	-114.926	-97.8189	22.7945	99.7263	3.28318	10.9552	3.89769
4062	N#CC1C(=N)N2C(NC(=O)C3C(c4ccccc4)CSC32)C(C#N)C1c1ccc(Cl)cc1	4.3	25.2987	379.119	7.101	12	8	5	1	1	255.564	1738	7.77018	3.97396	3.74376	4.9147	4.0216	3.39434	3.59297	33.4231	29.7143	21.8926	22.1012	19.6641	22.6327	256.15	220.627	198.274	185.856	186.293	158.818	143.509	146.489	153.941	157.322	157.415	162.758	162.825	159.485	26.9551	-28.0606	-41.9723	-0.188692	43.2347	-3.24268	-47.5835	-52.2015	10.5976	-2.52071
1382	O=c1c2cc(Br)cc(Br)c2nc(-c2ccccc2)n1/N=C/c1ccccc1O	17	22.0748	371.29	6.9466	22	7	3	2	2	195.268	3494	9.46669	5.93115	4.18645	4.76263	3.73071	3.93831	3.12219	85.2195	36.6136	34.7667	46.7586	33.0941	29.6705	289.451	250.515	247.193	270.949	255.632	154.887	142.9	145.557	152.665	159.11	159.706	151.55	148.962	150.418	28.3072	19.8971	49.7371	6.01894	-46.6531	-86.7749	-61.8987	-71.0307	7.33135	-1.08626
2191	CC1=NC(=S)N(n2c(CCl)nc3ccccc3c2=O)C(=O)C1/N=N/c1ccc(O)cc1O	13.5	25.0007	557.786	7.48713	16	12	6	4	1	296.297	1830	10.8521	6.11881	4.90136	6.30419	3.99098	4.22096	3.72462	38.9362	32.28	30.2549	30.0185	26.5644	22.3367	263.038	242.794	234.07	242.415	220.146	161.583	149.032	154.063	161.467	162.253	161.18	158.199	158.798	162.753	62.0206	48.7495	-14.034	-31.8732	-104.385	-37.4401	-23.9584	-102.739	12.3228	2.60842
2699	CCOC(=O)C1C(c2cccnc2)N(N=O)C(c2cccnc2)C(C(=O)OCC)S1(=O)=O	11	24.1315	369.614	7.07561	12	12	4	7	0	385.327	1642	9.89712	3.96512	2.55215	7.13569	6.48999	4.03768	3.76431	30.4074	32.1607	25.3534	28.1088	17.7209	13.9202	226.647	209.64	219.756	192.013	177.505	163.973	146.858	155.185	158.476	161.477	158.363	163.962	161.308	166.739	54.4063	43.6267	-62.1512	96.438	85.3771	7.28761	-240.849	-276.192	15.5556	15.5556
1705	Sc1nnc(CSc2nnc(-c3ccccc3)n2-c2ccccc2)n1-c1ccc(Cl)cc1	16	25.3915	319.015	6.92839	28	9	6	0	1	145.258	1940	8.35425	4.86655	4.84892	2.96445	2.66449	2.55619	2.63321	39.5918	32.8302	27.6731	26.8879	26.381	22.901	274.015	239.059	239.555	228.454	218.681	157.35	144.939	148.295	154.815	157.345	156.33	155.21	154.427	159.023	58.4795	18.9316	-46.2422	-71.4506	-49.7868	14.8179	45.8914	27.9881	9.62474	1.40525
309	N#C/C(=C\NN)C(=O)Nc1nc2ccccc2s1	25	13.4635	159.797	5.66169	9	7	5	1	0	172.059	970	9.94239	6.36667	4.61538	6.37255	4.40169	4.35247	4.08832	35.9259	32.9643	26.06	27.3696	24.4	19.9231	258.081	224.355	212.674	212.536	216.146	163.258	152.756	152.7	156.955	162.728	165.055	165.326	158.581	156.452	11.4012	-2.10608	23.8604	-2.24219	-24.5234	-26.7516	-4.70187	-40.8291	5.14129	0.823045
1424	CCn1cc(C(=O)N/N=c2\[nH]c3ccccc3[nH]c2=O)c(=O)c2ccc(C)nc21	17	22.7819	420.053	7.10509	20	9	6	3	0	271.778	1224	9.78723	4.82796	6.33784	5.78251	4.64094	3.81481	4.22185	26.0426	27.56	22.9429	21	16.1828	19.6081	236.998	218.139	190.481	184.172	160.234	163.579	150.336	155.493	160.397	163.239	162.879	161.116	169.038	165.759	74.837	70.3635	20.4237	-31.4414	-58.6283	-67.6288	3.52241	62.2141	13.2807	2.43187
1345	CCOC(=O)c1[nH]nc(-c2ccc(F)cc2)c1/N=N/c1ccccc1	17	19.1489	287.728	6.57831	17	7	4	2	1	235.194	1068	10.25	6.23077	4.74667	5.87986	3.95293	4.28561	3.9637	26.7	27.7857	21.55	23.2639	21.6538	19.1333	241.816	205.2	225.521	223.986	209.578	164.387	148.338	153.234	162.604	166.288	162.71	161.311	163.009	158.551	57.32	46.72	25.8	-23.68	-44.04	-55.08	-106.32	-131.2	8.17625	3.86687
1664	N#Cc1ccc(-c2ccc(-c3ccco3)o2)cc1	16	14.0613	110.995	5.29727	16	3	1	2	0	125.639	726	10.1481	6.17241	4.55556	4.65329	2.82022	3.88889	3.43827	26.8889	28.5517	20.3585	20.7708	20.6207	16.7037	270.689	221.482	202.714	197.062	220.804	153.641	139.898	142.987	151.618	152.973	154.834	153.034	153.472	154.439	22.6488	-7.5679	-31.9355	-44.2428	-29.9753	23.9753	0.278464	-15.5185	3.92044	-4.16049
815	Cc1cc(/N=C2\C(=O)Nc3ccc(OC(F)(F)F)cc32)ccc1N1C(=O)c2ccc(Cl)cc2C1=O	20	28.1965	652.83	7.73408	18	11	3	4	4	462.984	1812	13.8251	8.08005	6.5731	9.64551	4.71197	4.88669	5.01378	37.75	32.7885	27.8846	26.0179	25.4301	21.5053	274.981	259.668	226.691	223.407	222.884	164.611	146.121	155.07	152.511	157.705	161.688	159.58	159.402	165.022	56.9353	107.31	-7.83985	-39.8433	-153.353	-169.912	74.5323	104.595	5.27257	3.84983
1462	O=C1CC(=O)N(c2ccc([N+](=O)[O-])cc2[N+](=O)[O-])N1	16.1	14.5963	101.494	5.26186	6	10	4	6	0	373.944	910	17.04	11.0435	16.3636	14.9578	12.9854	10.8309	16.5909	36.4	34.7692	27.4615	27.6863	25.8696	36.9091	250.79	225.663	211.168	176.718	156.705	168.333	157.905	156.389	164.63	166.618	167.503	171.851	178.552	177.078	23.7136	13.6512	-56.8928	-37.9664	-17.8608	43.1712	6.7328	-13.1904	1.5856	-3.0048
2966	CC(C)N1CCN(c2c(-c3nnc(S)n3-c3ccccc3)cnc3c(C(F)(F)F)cccc23)CC1	10	27.9161	385.102	7.20627	21	10	6	0	3	336.117	1718	9.15514	4.71319	4.62873	5.60195	2.91418	2.98266	3.71049	28.6333	27.6406	21.2945	20.2118	20.5875	20.6463	232.547	213.865	186.738	181.137	201.291	167.971	148.789	160.423	159.605	161.466	162.271	167.213	162.949	164.704	107.171	135.962	66.5349	140.019	124.473	-37.6185	-146.494	-172.785	16.1211	9.70778
3349	COc1cc(C2CC(c3cc4ccccc4o3)=NN2C(=O)Nc2ccc([N+](=O)[O-])cc2)ccc1O	9	27.7316	555.529	7.57268	21	10	4	6	0	348.333	1500	10.5818	6.28462	6.09701	6.33333	3.86905	3.62201	4.13495	27.2727	28.6102	22.2033	20.0909	20.2308	19.4104	245.113	220.563	189.216	211.934	205.32	160.471	147.308	150.544	156.335	159.139	161.85	159.525	159.158	157.733	59.403	18.6949	-61.2949	-92.9382	-49.2291	7.68397	16.9603	83.4542	11.2086	-4.89157
3579	Cc1nn(-c2ccccc2)c2nc3c(nc12)/C(=C/c1ccccc1Cl)c1ccccc1-3	8	25.2702	418.95	7.16915	27	5	4	0	1	140.366	1438	8.40844	4.4548	3.47817	2.9243	2.88168	2.64602	2.45815	29.9583	28.6604	24.3889	22.4587	20.8898	17.9464	271.189	246.068	251.033	253.854	224.709	155.279	142.064	145.948	153.473	154.83	153.421	150.289	152.738	153.567	62.2455	54.1202	41.6186	-21.151	-51.0703	-107.84	-114.118	-67.1694	14.1688	7.35026
4316	Cc1ccc(NS(=O)(=O)c2ccc(NC(=O)c3cn(CCO)c4c(cc(O)c5ncccc54)c3=O)cc2)cc1	0	30.7759	3199.69	9.43179	26	11	4	6	0	411.438	1868	9.43563	4.94407	4.72139	6.53077	4.13443	4.49741	4.46907	29.6508	31.5522	23.9252	22.0926	19.443	17.8507	245.601	228.613	205.103	199.003	184.055	159.576	145.128	150.091	153.856	157.958	156.322	158.35	160.083	162.048	25.6845	46.8436	26.535	38.2099	-62.6694	-107.383	-37.6104	-41.594	14.1151	1.46107
589	CC(=O)NNc1nc2nc3c(c(-c4ccccc4)c2c(=O)[nH]1)CCCC3	22	20.5916	322.439	6.73143	16	7	5	2	0	211.75	1076	8.35556	3.09649	2.11364	4.70556	3.39155	3.39961	2.62658	23.9111	25.9583	18.9725	19.9245	14.2368	11.2727	228.595	201.904	215.62	192.211	152.955	163.325	149.008	153.848	159.929	159.778	156.299	160.523	165.06	170.1	68.6015	70.3669	36.1057	40.8375	-56.0291	-181.891	-91.6548	-56.6825	10.5837	9.19358
718	Cc1ccc(-[n+]2noc(O)c2CN2CCCCC2)cc1	21	15.6538	148.11	5.6911	11	5	3	2	0	128.639	835	6.3	1.86667	0.898551	3.21597	3.1104	2.76778	2.21014	20.875	23.8333	15.0918	12.5701	13.3467	9.82609	203.429	168.175	158.497	168.82	155.962	165.122	149.452	157.322	161.161	167.015	164.906	166.191	164.597	161.22	58.595	45.4875	30.805	46.6575	12.4075	-133.095	-140.912	-83.4475	8.52	-1
168	Cc1c(-n2c(Cc3ccc(Cl)cc3)nn(Cc3nnc(S)n3-c3ccc(F)cc3)c2=O)c(=O)n(-c2ccccc2)n1C	28	33.474	877.675	8.21236	33	13	8	2	2	334.199	2214	9.71081	5.53005	5.51893	5.06362	3.38671	3.55679	3.45551	33.5455	30.1831	25.3469	22.5988	22.3989	21.1978	252.804	232.71	209.224	204.8	200.783	162.953	148.731	155.756	160.293	160.265	162.365	161.655	162.722	162.653	111.959	52.7393	-72.4081	-69.6732	28.7016	-70.1823	-60.4651	-44.7648	18.9522	3.40037
4086	N#Cc1c(-c2ccccc2)csc1NC(=O)c1ccc(-c2cccs2)[nH]c1=O	4	21.8964	233.223	6.48161	22	7	3	2	0	235.59	1556	9.48509	6.75956	6.69697	5.7461	4.17728	4.34588	5.0642	37.9512	33.8636	26.2093	28.4884	26.6721	24.6364	284.249	244.827	227.79	227.737	232.127	153.314	141.071	142.007	149.326	152.668	153.943	154.027	154.053	156.122	19.9156	7.84183	7.64446	-2.66178	-11.7592	17.825	-12.1625	-42.926	7.16062	-3.25699
1565	Brc1ccc(-c2nc3sc(Cc4noc5ccccc45)nn3c2Br)cc1	16	21.1893	255.828	6.50002	23	8	4	1	2	115.188	3624	9.90497	7.05583	6.10377	3.19966	2.70096	2.86767	2.7747	100.667	42.225	41.4211	42.4085	74.9302	60.1892	309.094	264.035	250.931	261.67	287.734	154.121	143.264	145.906	151.771	155.554	157.532	155.282	153.197	149.717	37.3587	1.62021	-24.6123	-61.8241	-14.1204	39.4868	1.0905	-31.725	5.12346	-1.46605
3204	Cc1ccc(Sc2nc(SCc3ccc(Cl)cc3)nc(-c3ccccc3)c2C#N)cc1	10	24.1391	431.859	7.1995	24	6	3	0	1	164.151	1866	7.3162	5.07646	4.16444	3.35002	3.17405	3.12627	2.82636	38.0816	32.0769	26.8738	26.1887	26.5161	22.75	277.039	246.48	248.311	268.961	256.45	153.366	139.042	143.396	147.216	154.585	151.714	148.747	148.854	149.534	40.0983	-3.80439	14.3377	59.5723	37.0408	-46.3538	-95.5911	-85.7616	7.85339	-2.02207
3155	Cc1ccc(C2=CC(c3c(-c4ccccc4)[nH]c4ccc(C)cc34)C(C#N)=C(N)O2)cc1	10	25.4605	383.951	7.11367	21	4	3	1	0	192.083	1242	7.38182	4.07143	3.14465	3.49242	3.08076	3.02282	3.02655	22.5818	25.1695	19.8189	17.7945	16.7083	15.0063	245.813	232.755	216.612	225.69	198.621	156.773	142.721	145.219	148.363	154.309	153.496	151.03	154.788	157.226	66	31	-23	17	29	-12	-82	-128	16.9339	2.83471
2777	CN(C)c1ccc(-c2nc(NCCON3C(=O)c4ccccc4C3=O)nc3c2SC2=NC(c4ccccc4)(c4ccccc4)C(=O)N23)cc1	11	39.4748	7290.8	10.4836	30	12	7	4	0	358.871	2216	9.26211	5.43063	5.96377	4.60092	3.25618	2.96719	3.2702	28.4103	29.1176	24.9448	23.648	21.2054	21.3152	253.04	237.266	217.852	215.632	213.546	158.741	145.087	151.918	153.635	156.854	157.659	156.731	155.807	158.775	105.739	95.3865	125.641	8.65425	-130.66	-109.821	-78.571	13.4301	25.7973	14.8654
2902	CCSc1nnc(-c2ccccc2COc2ccccc2C)o1	10	17.6657	203.194	6.14707	17	5	2	2	0	122.087	1148	7.32791	3.90769	2.81624	2.97773	2.45988	2.52593	2.5332	28	27.9302	20.6667	18.4286	21.3846	15.8205	236.561	208.184	180.197	196.128	227.065	158.818	143.492	150.477	151.985	157.945	163.087	158.029	146.572	153.785	68.4376	61.5618	10.6091	-73.9147	-56.0061	-25.4735	-36.6887	-39.2791	10.282	3.7906
2023	O=C(O)c1ccccc1C1CC(c2cc3ccccc3o2)=NN1C(=O)Cn1c2ccccc2c2nc3ccccc3nc21	14	35.1578	800.592	8.14397	32	9	5	4	0	317.417	1748	9.87879	6.47727	6.13736	4.80934	3.81776	3.74905	3.40568	26.4848	28.3973	22.3082	21.8061	20.9375	19.8187	260.555	231.329	213.83	219.16	217.876	157.002	143.554	147.789	155.259	155.581	158.493	157.448	155.7	156.273	68.4463	34.0248	-29.3306	-88.7273	-45.7107	-5.52893	-25.9091	-5.39669	14.7665	2.58678
266	Fc1cccc(Cn2c(-c3ccc(-n4cncn4)cc3)nc3c(F)cc(F)cc32)c1	26	24.1272	404.867	7.10217	26	8	5	0	3	316.25	1294	12	7.35354	6.86022	7.1875	3.58856	4.33446	4.57646	29.4091	29.8958	23.2268	21.9709	22.3636	21.043	261.369	232.17	222.227	223.046	217.269	166.936	148.25	154.672	159.696	163.919	160.562	158.004	160.186	169.14	40.2066	-22.3802	-57.1488	3.66116	-45.9256	-4.57851	38	-58.4463	6.07438	-3.41322
3770	N#Cc1c(N)n[nH]c1N1CCOCC1	7	10.5947	68.4692	4.56286	5	6	5	1	0	118.083	608	8.64	2.18182	0	4.72333	3.8125	4.04545	1.5	24.32	26.4615	18.0556	16.1481	9.09091	2.4	206.521	175.714	138.196	131.826	84.6483	171.604	158.285	165.056	167.987	166.844	172.496	174.813	184.946	184.971	31.3664	-2.472	-15.0544	-7.6544	-44.3008	-52.4896	18.3808	18.304	6.2896	0.592
2891	Clc1ccc(-c2nnc(NC34CC5CC(CC(C5)C3)C4)s2)cc1	10	19.1608	397.551	6.81823	11	5	3	0	1	93.9879	1360	5.44301	3.32692	2.4202	2.18576	2.1308	2.31735	2.16571	31.6279	28	16.0889	13.0616	22.0385	16.7091	234.318	176.192	165.819	178.658	218.327	160.229	143.857	147.751	156.438	165.716	164.645	165.169	156.616	152.119	37.3498	-9.19459	12.7474	71.5451	13.6046	-19.3521	-60.6431	-82.1428	3.73012	-9.20011
4369	COc1ccc(C(=O)/C=C/c2ccc(Cl)cc2)cc1	0	14.3205	103.937	5.28564	12	3	0	2	1	133.95	1006	7.61265	4.27327	2.96944	4.18593	3.36192	3.42281	2.98323	31.4375	27.2727	21	16.5806	21.1081	19.15	253.66	221.037	168.981	187.576	224.271	155.366	140.162	146.424	150.179	153.913	157.982	157.583	150.067	153.999	24.8403	-24.0492	-43.3226	-31.5572	42.5498	25.2214	-40.8207	-40.3345	4.52441	-5.94922
686	N#Cc1c(-c2ccccc2)nc(SCc2ccc([N+](=O)[O-])o2)[nH]c1=O	21	19.2583	241.805	6.40442	17	9	4	4	0	294.642	1294	12.4127	7.01852	7.74	8.41835	4.4207	4.35151	4.96352	36.9714	34.1892	28.3857	28.8382	23.3889	22.04	272.077	239.51	236.984	227.153	215.664	159.199	146.541	147.943	154.526	158.049	156.123	158.103	157.892	162.036	34.4433	32.3499	2.1619	3.25515	-39.2715	-149.383	-0.927075	43.8816	3.80163	-1.92408
1636	Sc1nnc(Sc2nnc(-c3ccccc3)n2-c2ccccc2)n1-c1ccc(Cl)cc1	16	24.6844	293.184	6.8122	28	9	6	0	1	141.008	1902	8.81213	5.57843	4.95533	3.06539	2.96065	2.90978	2.82786	41.3478	33.84	29.4021	30.1959	31.4632	22.0619	281.327	247.007	252.143	255.478	243.893	156.815	144.975	147.962	153.298	157.027	157.438	153.161	155.795	157.737	47.8729	4.31674	0.849611	20.9011	0.299727	-33.3598	-57.0903	-87.0489	8.98393	2.54537
4460	C=C1CCC2C(C)(C)CCC[C@]2(C)C1CC(=O)N(C(=O)NC1CCCCC1)C1CCCCC1	0	25.9142	1265.51	8.33715	0	4	2	2	0	231.819	1318	3.7037	1.66527	1.12367	2.86197	2.32026	2.48384	2.16824	16.2716	19.5119	12.2625	10.6509	12.8159	10.6396	181.4	159.144	128.972	127.785	157.905	164.771	145.195	153.295	158.138	162.782	164.77	168.069	159.451	162.22	80.2593	46.0741	7.97531	42.3704	-7.48148	-45.6667	-128.049	-181.506	19.6955	-3.27572
3565	Cc1ccccc1OCc1ccccc1-c1nc(-c2cccc(Br)c2)cs1	8	21.2702	285.556	6.64769	23	4	1	1	1	121.276	2440	6.92248	4.0713	3.17013	2.69503	2.2635	2.4711	2.41205	54.2222	31.625	25.2947	24	22	22.0549	268.006	232.169	205.122	217.225	233.039	153.075	139.017	144.223	148.44	153.195	154.201	151.368	146.767	149.604	38.0356	-9.43032	-36.1604	-46.4309	22.2427	17.4721	-36.1438	-38.8464	8.68	-2.72
661	Cc1ccc(-n2nnc(C3=NN(C(=S)Nc4ccccc4)C(c4ccc(C#N)cc4)C3)c2C)cc1	22	27.6223	509.283	7.48577	23	8	7	0	0	197.208	1594	7.90421	4.88636	4.34279	3.40014	2.61815	2.86499	2.83047	27.4828	27.3548	21.2748	20.1458	21.697	18.1986	249.135	219.458	200.014	211.061	218.298	159.699	146.553	150.558	155.845	160.617	161.263	158.726	156.401	157.5	82.4397	22.8354	-59.6653	-48.631	-5.36953	-13.134	-58.2911	-49.229	14.1813	-3.78329
241	CC(Cc1cn(CC(=O)c2ccc(Br)cc2)nn1)(OCc1cn(CC(=O)c2ccc(Br)cc2)nn1)c1ccc(S(=O)(=O)c2ccccc2)cc1	26	39.5395	1771	9.08874	34	14	6	5	2	405.741	4646	8.88224	4.93637	4.9786	5.07176	2.77474	3.22293	3.2334	58.075	34.6824	26.2151	21.2788	21.959	24.4444	259.057	223.938	190.358	191.89	193.529	158.666	144.156	149.769	153.499	158.234	159.844	161.233	162.283	159.241	54.5274	-26.861	-102.413	-17.7733	38.9744	-54.4893	-49.5581	-59.0572	10.0625	-19.8125
2883	CCSc1ccc(OCc2nnc3n2N=C(c2ccc(Cl)cc2Cl)CS3)cc1	10	21.9773	622.594	7.46351	17	9	4	1	2	124.684	2050	7.77497	4.70821	4.39925	2.83373	2.4884	2.78018	2.64811	46.5909	35.4043	30.0879	29.7442	30.2838	28.8814	271.257	237.241	203.847	203.473	215.996	157.936	144.357	149.764	155.531	156.091	156.817	159.88	162.589	156.984	63.5803	46.1777	-10.1761	-40.3443	37.7771	45.3081	-41.3896	-65.0848	8.56405	2.34711
3397	Cc1ccc(-c2nn(CC(=O)N3c4ccccc4Sc4ccc(C(F)(F)F)cc43)c(=N)s2)cc1	9	27.3303	553.777	7.54054	23	10	4	1	3	380.43	1896	10.8802	6.85876	6.0135	7.45942	3.8248	5.05673	4.49175	37.1765	33.3091	28.2566	24.912	25.5678	26.9533	266.807	250.254	227.4	228.637	209.723	163.576	145.499	153.401	153.188	158.903	159.733	156.79	162.892	169.32	51.9129	54.5233	-10.8065	5.94523	8.63523	-29.3076	79.3248	-89.3872	8.7128	0.0103806
3076	Cc1ccc(C2=CC(c3c(-c4ccccc4)[nH]c4ccc(Cl)cc34)c3c(nc(=S)[nH]c3N)O2)cc1	10	28.3579	423.775	7.30196	27	7	4	1	1	168.13	1834	7.82231	4.88632	3.59873	3.00232	2.8282	2.85153	2.73123	32.75	28.8852	23.2652	22.2313	23.1387	22.8171	264.315	243.173	228.29	242.991	228.088	156.061	144.027	145.573	149.446	153.901	153.45	150.335	153.115	156.78	56.0226	27.7472	-6.43928	4.70205	26.718	9.11977	-121.451	-136.292	13.9072	3.80772
740	O=C1CSC(c2cc3ccccc3nc2Cl)N1c1ccccc1Cl	21	19.137	168.203	6.00064	16	6	2	1	2	137.514	1656	8.15706	4.05193	3.62309	3.81983	2.93576	2.64861	2.80977	46	34.3077	30.0976	32.0843	28.4444	21.098	286.224	251.601	256.646	223.042	220.809	154.247	140.768	145.298	151.494	154.15	149.991	155.171	154.852	155.007	31.0732	-0.225575	-45.0881	-27.2091	-23.6606	1.90931	8.05075	-16.733	6.25	0.305556
976	CC(O)(Cc1cn(CC(=O)c2ccc(Br)cc2)nn1)c1ccc(S(=O)(=O)c2ccccc2)cc1	19	26.7921	672.586	7.73491	23	9	3	4	1	313.746	2806	8.41985	4.52795	3.87892	5.6026	2.65778	3.76278	3.65491	50.1071	34.1017	24.9242	19.9392	21.783	21.4712	252.99	220.369	182.127	180.811	194.98	158.223	143.038	147.898	152.362	158.715	160.673	161.826	158.113	160.323	22.1447	-0.741693	-51.7886	-12.0864	-12.0536	-21.3548	-6.96058	-86.9256	8.10204	-14.6327
377	O=C1NN=C(c2ccccc2)/C(=N/Nc2ccccc2)C1=O	24	17.0276	215.342	6.16068	12	6	4	2	0	197.167	912	10	5.6	4.13208	5.79902	4.35311	4.425	4.08491	26.8235	28.1111	22.2958	20.9846	20.2833	17.5094	251.627	211.759	218.629	224.16	207.741	160.694	148.306	149.601	158.692	164.212	162.931	158.944	158.629	158.505	25.1488	11.4602	68.8408	38.5121	-23.0381	-65.5813	-85.8893	-99.8512	4.93426	-2.42907
1443	COc1ccc2cc(C(C)C(=O)Nc3ccc(S(=O)(=O)Nc4ncccn4)cc3)ccc2c1	16.8	25.8095	327.566	6.98561	22	9	4	4	0	295.855	1594	8.77172	3.57895	4.24843	5.37918	3.43912	2.91989	3.50274	28.9818	31.5172	22.7869	19.7218	16.4825	16.6792	241.524	221.167	179.068	190.542	179.92	160.097	144.866	151.768	153.6	158.238	159.682	157.772	157.571	160.333	28.2018	22.9696	-86.795	-38.938	22.7428	-42.2833	-24.3128	87.2199	9.78116	-6.45752
1215	O=C(/C=C/c1ccccc1)Nc1nc(-c2ccccc2)cs1	18	17.0395	309.884	6.52466	17	4	2	1	0	144.559	1080	7.62346	4.73913	4.37209	4.01553	3.33309	3.35548	3.32558	30	29.0789	19.1781	20.7794	21.2826	21.6047	259.952	207.322	201.714	203.594	206.116	155.178	141.711	144.677	153.324	155.974	155.952	157.613	157.154	154.697	17.1838	-16.3553	-22.0439	-1.52812	33.0329	-22.7449	-9.30316	-26.6283	2.9321	-3.83642
648	O=C(O)CNC(=O)CNC(=O)c1cc(-c2nc3cc([N+](=O)[O-])ccc3[nH]2)ccc1O	22	23.1909	1292	8.26256	15	12	5	7	0	433.806	1356	12.3111	6.63095	7.05263	9.64012	5.00837	4.65774	5.39401	30.1333	29.8511	22.7423	21.01	20.5	21.9737	240.464	213.195	195.451	205.63	192.588	164.676	152.313	153.865	160.035	164.086	163.455	160.759	162.307	161.791	26.964	6.41481	-93.7595	-76.0025	66.0598	-5.79605	-9.35852	13.6079	5.0084	-6.56296
1486	Clc1cc(Cl)c(Cl)c(-c2nnc3sc(COc4ccccc4)nn23)c1	16	19.925	454.271	7.03498	20	9	4	1	3	110.575	1968	9.80174	5.7575	5.76353	3.2522	2.85842	2.71227	2.86356	57.8824	39.4595	38.9412	38.3607	43.0476	28.1795	304.54	262.657	258.777	272.737	268.975	156.917	145.191	149.102	154.842	158.845	160.346	156.943	153.776	158.044	28.0369	-8.73818	12.9448	2.27699	-0.8768	-13.8083	-17.9038	-24.4287	3.61159	-0.128893
591	O=C1C(Cl)C(c2cc3ccccc3nc2Cl)N1c1cccc(Cl)c1	22	19.2059	206.684	6.20666	16	6	2	1	3	137.433	1688	8.53757	4.2376	3.83899	3.92664	3.22864	2.71484	2.90235	48.2286	33.6316	29.25	29	31.8033	30.3333	290.862	248.979	250.636	247.744	232.149	155.109	141.483	146.361	153.026	155.486	154.038	153.993	156.846	156.177	24.8356	-8.35407	-22.8815	-29.16	-9.86914	-12.6385	3.72049	-10.1077	5.20408	-3.16327
2996	Nc1nc(COC(=O)c2ccc(Br)cc2)cs1	10	13.0157	76.1038	4.86273	11	6	2	2	1	132.943	2112	9.05814	4.37566	2.9273	5.11319	3.09046	3.43932	2.79481	81.2308	38.963	31.2128	25.4	30.0714	30.2963	275.309	224.92	210.203	205.194	225.25	157.664	145.394	149.074	154.328	158.574	160.115	158.752	155.55	155.601	15.9855	-5.8946	-17.7293	-39.1958	9.20124	-7.72138	-9.39848	-21.8668	2.22633	-4.76331
1295	O=C1NN=C(c2ccc(Br)cc2)/C(=N/Nc2ccccc2)C1=O	17.5	17.8441	228.213	6.26319	12	7	4	2	1	196.078	2136	10.2079	5.88951	4.38924	5.76701	4.31774	4.36515	4.03899	62.8235	33.7778	29	25.1692	31.6167	31.6226	271.401	227.192	226.061	237.004	225.816	159.36	147.748	148.884	157.443	163.156	162.585	158.164	157.43	156.72	22.5764	5.86205	63.5491	38.7794	-19.8613	-60.5261	-81.2519	-96.2025	3.96713	-4.391
2598	COc1ccccc1N1CCN(Cn2nc(C34CC5CC(CC(C5)C3)C4)n(/N=C/c3ccccc3O)c2=S)CC1	12	32.4414	2534.76	9.22415	17	9	6	2	0	210.243	1832	6.10826	2.85826	2.86179	2.69542	2.2178	2.14114	2.13931	23.4872	24.7619	16.9422	13.8945	17.1121	16.0293	215.38	182.964	167.113	179.098	172.378	162.861	147.191	154.968	157.427	164.961	166.213	161.323	162.682	156.804	94.959	18.6271	14.966	-3.04485	-112.955	-70.6819	-54.7466	-45.4016	18	-4.22222
3857	O=C1CC(c2cc3ccccc3nc2Cl)N(Cc2ccccc2)C2CCCCC2N1	6	24.0178	283.181	6.7447	16	5	3	1	1	171.561	1426	6.06437	2.82845	2.33268	3.06359	2.49158	2.36895	2.39137	25.4643	25.0167	17.3106	16.0387	15.9615	14.1893	229.4	190.95	180.799	182.97	178.241	160.09	144.009	150.679	157.681	160.818	158.804	158.14	157.665	159.97	49.0103	-1.60889	-7.5517	-10.4236	1.20729	-30.0039	-25.2075	-53.8063	8.80612	-1.66709
2668	O=C1O[C@@H](COC(=O)N2OC3C=CC2C3)CN1c1ccc(N2CC[S+]([O-])CC2)c(F)c1	11	24.9437	309.224	6.86547	6	11	3	6	1	351.895	1610	10.0624	6.00236	5.41124	6.63953	4.09118	4.23134	3.73816	30.3774	31.1228	18.7391	18.6614	19.9468	20.6437	225.59	176.998	175.172	169.811	172.357	165.309	147.751	156.919	163.454	163.895	164.817	166.481	166.519	162.483	67.5538	60.6189	-59.0477	-85.9414	-94.8873	22.2176	91.4007	-38.4529	6.41118	-5.67355
1957	O=[N+]([O-])c1ccc(-c2nn(-c3ccccc3)cc2-c2nnc(-c3ccccc3)o2)cc1	14.3	24.7249	345.667	6.97688	28	8	5	3	0	256.25	1280	10.8696	7.64773	6.63158	5.57065	3.43835	3.83902	3.61111	27.8261	29.52	22.2551	22.25	23.8523	21.3895	262.454	228.381	226.562	246.4	241.132	158.752	146.402	147.776	154.305	161.569	160.161	154.43	154.973	157.068	46.7429	41.4008	29.2231	-33.7316	-57.8922	-60.3573	-61.1777	-46.1059	7.13611	-1.73582
3954	COc1ccc(C2CC(=NOC(=O)c3ccccc3OC(C)=O)CC(c3ccc(OC)cc3)N2C)cc1	5	28.4792	682.019	7.83339	18	8	2	6	0	287.056	1556	8.1791	4.07831	4.23125	4.28441	3.13441	2.98896	2.95451	23.2239	25.3143	19.4966	17.0057	16.4157	16.975	223.873	210.84	170.446	168.786	177.196	160.593	144.614	153.79	154.576	156.596	159.287	160.52	160.095	158.588	104.361	6.62843	-97.0762	-19.7097	59.5021	-9.92381	-77.4789	-55.4544	17.3999	-1.46202
3525	N#C/C(=N\Nc1ccc(Cl)cc1)c1nnn[nH]1	8	12.7969	85.2338	4.97603	11	8	7	0	1	125.672	962	11.8959	7.16444	5.31401	5.464	4.04642	4.58082	3.9032	41.8261	34.75	27.325	25.027	26.88	25.3043	269.797	222.908	214.686	246.767	229.174	169.456	159.642	158.288	164.593	173.212	173.495	158.404	165.631	177.832	16.7394	-2.55406	15.7717	37.2415	7.05496	-17.0498	-41.9028	-37.2968	1.42155	-5.24575
3703	CC1NC2C(NNC2c2ccc(Cl)cc2)C(=O)N1N	8	15.0442	126.55	5.48249	6	7	5	1	1	141.005	1046	6.84586	2.25992	1.93093	4.02872	2.36043	2.61692	2.75876	29.8857	26.9459	19.2021	15.58	16.8571	16.0811	214.756	181.254	139.619	140.168	144.173	168.286	155.975	159.357	165.768	167.949	169.746	169.478	166.922	168.19	27.3299	-5.3042	-29.0094	-46.4247	-33.0558	2.61679	10.2168	-7.76148	8.37796	-4.8702
1074	CC(Cc1cn(CC(=O)c2ccccc2)nn1)(OCc1cn(CC(=O)c2ccccc2)nn1)c1ccc(S(=O)(=O)c2ccccc2)cc1	19	37.9065	1653.53	8.97928	34	12	6	5	0	407.918	2198	8.70556	4.84103	4.85556	5.09897	2.78245	3.23736	3.25079	27.475	29.8824	21.0968	18.6635	18.8205	19.5333	242.249	212.156	186.152	184.607	187.782	159.8	144.629	150.331	154.453	158.894	160.04	161.671	163.047	159.753	57.5003	-17.779	-93.5899	-19.3189	30.6365	-54.0359	-54.8587	-64.5153	11.9031	-15.8106
3301	O=C1c2ccccc2C(=O)c2c(O)cc(CO)cc21	10	14.8943	113.016	5.36938	12	4	0	4	0	228.472	806	10.6207	3.13889	1.44	7.87835	4.75887	4.45833	3.01333	27.7931	28	24.3788	22.8571	14.0278	9.4	259.626	252.538	201.585	176.072	151.372	154.927	140.781	142.434	146.886	153.541	156.496	158.198	159.983	164.837	14.0226	10.3924	40.0559	-2.27824	-78.5577	-84.2105	-27.6968	12.5065	8.98216	3.24376
380	Cn1nnc2cc(/C=N/Nc3cc(C(F)(F)F)nc4c(C(F)(F)F)cccc34)ccc21	24	24.7791	611.906	7.54798	19	12	6	0	6	503.597	1476	15.5349	12.5395	7.33871	11.7116	6.31052	12.7138	4.3871	34.3256	32.3043	27.4607	24.48	30.0395	22.3387	254.465	245.531	209.313	200.149	202.969	179.462	154.799	167.597	161.962	172.516	172.65	178.951	191.353	166.462	55.1958	98.828	-16.874	-58.7918	37.867	36.4586	21.1536	-47.5895	2.82585	0.433207
80	CCCc1cc(CCCCCCCCC(=O)O)on1	31.2	13.6538	892.618	7.43601	5	4	1	3	0	170.083	806	5	1.17333	1.16667	3.86553	2.14583	2.16	2.16319	18.3182	20.4091	9.93578	9.98058	9.94667	9.55556	182.326	127.085	131.075	125.934	127.816	165.738	146.747	154.803	165.088	165.856	164.833	165.15	164.39	166.108	56.3182	42.8368	-23.2831	-48.345	-66.5248	-52.0413	-26.8616	-20.2562	3.13636	-1.64618
1800	COc1cc(/C=N/N=c2\scc(C3=CC(=O)C=CC3=O)n2-c2ccc(C)cc2)ccc1O	15	24.9437	778.49	7.82051	17	8	3	4	0	271.448	1542	9.38126	5.62963	4.98625	5.32251	3.52062	3.63081	3.42322	30.2353	29.6111	24.5481	22.6228	22.3333	20.8247	253.868	237.381	212.841	223.97	217.189	157.634	143.712	148.721	151.94	156.544	157.821	155.851	156.804	154.2	60.4878	2.09723	-43.2943	-14.988	25.3521	-0.283054	-4.33526	-74.7425	13.0185	-0.627835
4509	O=c1n(CCOCc2ccccc2)nnn1-c1ccccc1	0	16.9586	566.612	7.12813	17	6	4	2	0	158.333	916	8.47368	3.6	4.43396	4.16667	2.95517	2.76111	2.94549	24.1053	26.475	18.1235	16.125	14.4333	16.1509	228.412	185.488	167.043	179.362	158.719	163.244	149.337	156.202	160.538	166.239	169.476	161.234	165.013	164.519	43.338	7.20499	17.5291	-23.903	-42.7729	-53.2632	-6.49307	29.903	5.35734	-2.20776
150	CC(=O)N1C(=O)C(=O)NC2CCCCC21	29	11.5491	67.7963	4.62197	0	5	2	3	0	196.139	664	8	0	0	6.76341	3.80392	2.51923	1	22.8966	24.2333	16.2683	14.9756	3.57692	1	200.212	164.048	135.903	101.907	58.9239	166.746	149.364	157.634	165.422	164.854	166.974	172.154	178.865	184.918	49.4673	56.8775	35.4566	-21.9227	-101.734	-112.892	8.21879	20.8038	6.72295	1.3805
3045	COc1c(C(=O)O)c(O)c(S(=O)(=O)Nc2ccc(C)cc2)c2occc12	10	20.2097	304.516	6.67423	15	9	1	7	0	321.855	1380	10.8889	4.34211	4.08955	7.85012	6.9653	3.79167	4.2272	33.6585	35.186	30.4167	30.8687	18.4737	17.0597	244.411	248.666	201.924	179.268	183.054	159.658	144.666	150.734	150.045	156.105	157.884	164.895	159.89	159.589	21.9186	58.9543	5.33056	169.464	-98.7527	-74.2674	-2.44154	-154.437	13.4366	9.4533
2097	Cc1ccc2c(COc3cccc(OCc4cc(=O)oc5cc(C)ccc45)c3)cc(=O)oc2c1	14	27.1459	265.059	6.80373	26	6	0	6	0	262.833	1414	9.39286	5.05455	4.62185	4.69345	3.16942	3.42727	3.06536	25.25	27	21.1707	17.9203	18.7636	16.3361	247.155	229.752	181.699	206.29	208.798	155.913	140.873	147.621	148.876	154.279	158.975	153.265	151.093	159.409	79.75	16.25	-58.8125	2.625	-59.6875	-52.0625	-39.125	4.9375	10.75	-1.75
554	COc1c(F)c(F)cc2c(=O)c(C(=O)NNC(=S)Nc3ccc(Cl)cc3)cn(C3CC3)c12	22.6	25.0411	2918.18	9.14187	16	11	4	3	3	346.325	1868	10.7765	4.68135	5.10576	7.06785	4.48809	4.57291	4.30786	38.1224	31.3462	27.7925	26.9727	22.2793	21.5542	255.093	233.801	214.542	192.19	162.965	165.106	149.442	155.358	160.613	159.458	161.857	163.96	172.205	170.761	55.7904	34.7736	94.6659	13.8659	-66.3323	-149.446	-45.8333	16.8786	10.5389	-0.24698
28	COc1ccc(/C=N/n2c(-c3ccc(C)cc3)nn(Cc3nnc(S)n3-c3ccc(F)cc3)c2=O)cc1	35	29.1459	643.105	7.77464	28	11	7	2	1	286.833	1766	9.81879	6.59378	5.72222	4.86157	3.69536	3.90665	3.58146	29.9322	29.1587	24.122	20.9037	24.8	21.5159	247.544	227.326	202.279	217.508	216.026	163.141	148.457	155.422	158.628	162.146	164.397	160.999	162.356	163.207	95.7619	23.8411	-62.8232	-33.0416	80.4347	50.9937	-47.2527	-170.426	14.7337	-1.88394
712	O=c1c2cc(Br)cc(Br)c2nc(-c2ccccc2)n1/N=C/c1ccc([N+](=O)[O-])cc1	21	23.5984	590.139	7.47897	22	9	4	3	2	274.045	3606	11.0508	5.62239	4.71404	6.52489	3.95147	3.76476	2.95708	85.8571	37.9778	35.4348	46.2527	31.977	30.2326	292.764	254.752	252.246	275.207	248.571	156.241	144.635	146.523	153.18	160.297	159.608	150.892	150.969	150.741	32.2471	25.9744	45.3193	-28.531	-100.186	-117.954	-92.0835	-7.80952	5.20408	-2.83673
2708	O=C(Nc1ccccc1[N+](=O)[O-])c1cn(CCO)c2c(cc(Cl)c3ncccc32)c1=O	11	24.1842	508.514	7.3629	20	10	4	5	1	354.116	1576	11.1653	6.27244	6.31461	7.69818	5.00725	4.95786	5.14942	34.2609	30.7551	26.1981	26.6518	23.3365	22.2921	259.115	240.39	224.724	204.618	194.416	160.366	147.357	150.443	155.527	158.368	155.381	159.138	162.355	162.886	36.5481	30.5517	36.8566	-29.5014	-100.646	-48.0716	-6.09223	1.79171	10.6148	6.19282
1868	O=C(c1ccc(Nc2nc(-c3ccccc3)nc3ccccc23)cc1)N1NC(S)SC1c1ccc([N+](=O)[O-])cc1	15	31.9338	408.893	7.39975	28	11	6	3	0	322.586	2064	9.28634	4.31339	4.62835	5.203	2.94212	2.85265	3.01451	33.2903	30.8806	23.7762	22.8733	20.4359	18.269	262.394	228.67	227.395	228.519	205.863	157.801	145.414	147.479	153.831	159.146	156.866	152.292	153.507	157.019	52.2946	29.5731	13.6394	-84.776	-125.903	-89.6496	-25.7526	85.8597	8.80021	-4.23933
1815	Cc1ccc(-c2csc(NC(=O)c3c[nH]cc3-c3ccccc3)n2)cc1	15	20.5631	206.796	6.28725	22	5	3	1	0	162.142	1240	7.68475	4.37745	4.09677	3.77075	3.06388	3.06727	2.84767	28.8372	28.6087	20.3778	21.2473	20.5735	19.5161	255.009	220.985	198.366	203.191	201.893	156.576	143.405	146.676	150.681	155.641	157.903	158.095	158.758	155.252	36.1252	4.05721	-13.7314	11.5411	7.76864	-23.9429	-22.1855	-13.6944	8.5219	-2.38994
2384	COc1ccc2[nH]c(C)c(Cc3nn4c(Cc5ccc(OC)c(OC)c5)nnc4s3)c2c1	12.62	25.3226	439.686	7.24921	23	9	5	3	0	172.476	1544	8.48081	4.89181	4.82456	3.13592	2.56736	2.61644	2.79792	28.0727	28.7288	24.0734	18.9008	19.9211	21.0632	234.879	236.959	179.123	183.185	178.973	161.623	147.405	155.086	153.145	155.527	160.513	161.564	164.388	162.567	99.1044	9.99669	-88.4024	-99.7405	-13.0305	39.478	90.3266	6.17686	20.5702	6.71074
3978	Cc1c(/N=C/c2cccc([N+](=O)[O-])c2)c(=O)n(-c2ccccc2)n1C	5	19.3558	407.257	6.92574	17	7	4	3	0	262.444	1052	9.7561	3.9625	4.47945	6.40108	3.68835	2.94444	3.06545	25.6585	27.3256	22.2118	18.6316	15.3375	16.0548	237.636	221.481	185.251	188.32	173.367	162.007	148.482	154.464	158.086	160.66	162.956	158.381	160.28	161.122	64.4884	47.3867	-17.0357	-93.862	-88.7287	-38.0976	15.3165	66.4729	11.6835	0.289114
3267	Cc1cc(-c2ccc(Cl)cc2)n2nc(-n3nc(C)cc3-c3ccc(Cl)cc3)cc2n1	10	24.2365	301.93	6.80881	26	7	5	0	2	135.399	1668	8.23851	3.99293	3.64251	2.88084	2.77182	2.48144	2.49848	35.4894	30.0392	24.7624	22.219	20.9545	22.8043	265.826	239.754	227.703	209.325	197.605	158.561	145.419	150.548	157.079	156.758	156.506	158.728	161.78	159.914	74.8362	42.5264	-23.9883	0.901816	-56.4044	-77.3886	-32.9874	-85.4906	11.5935	2.14396
1863	Cc1ccc(C2C(C#N)=C(N)Oc3[nH]nc(C)c32)cc1	15	15.6419	134.581	5.59531	11	5	4	1	0	144.972	814	8.41176	1.75	0.571429	4.26389	3.79577	2.82812	2.20238	23.9412	26.1111	21.4658	18.3333	10.375	9	234.635	233.514	184.404	180.309	127.552	162.387	148.66	151.089	151.489	157.924	161.535	161.352	170.616	167.131	56.3806	34.7716	-31.6955	12.6747	-13.9862	-105.076	-39.3495	-3.65398	12.8201	3.24913
107	CSc1nnc(-c2ccncc2)n1-c1ccccc1	30	14.6875	126.799	5.48445	17	5	4	0	0	94.5312	968	7.94982	1.60556	1.03922	3.04939	2.70945	2.22593	1.96078	31.2258	30.3939	24.339	23.7049	13.1667	7.37255	253.944	232.004	225.817	219.065	158.573	159.562	146.132	151.62	154.437	160.28	158.91	150.825	155.653	166.924	45.8392	37.0228	-11.714	-50.3013	-84.6091	-65.1658	-4.84992	45.4634	8.93965	5.20499
3212	FC(F)(F)c1cccc2c(N3CCOCC3)c(-c3nnc(S)n3Cc3ccccc3)cnc12	10	26.364	427.496	7.25187	21	10	5	1	3	331.84	1656	10.4398	4.82861	4.73048	6.26112	3.2784	3.14503	3.8417	31.2453	29.3509	22.8226	22.0072	20.8954	19.6824	243.838	222.079	219.618	202.239	193.341	167.439	148.172	159.526	157.109	163.239	159.193	164.631	163.21	170.271	71.1907	64.4329	25.0296	49.2044	-3.42504	-138.788	-96.1336	-57.836	9.86543	7.15593
1855	CCSc1nc2ccc([N+](=O)[O-])cc2c(=O)n1Cc1ccccc1	15	18.5107	223.041	6.28283	16	7	3	3	0	250.365	1222	9.34473	3.27309	2.40084	6.4196	4.8175	3.05965	2.73676	31.3333	30.0976	23.6	23.4368	17.7108	15.3924	247.229	222.32	223.47	207.857	189.288	159.658	145.444	150.596	153.642	160.962	157.156	156.03	155.14	157.699	55.6173	72.284	43.3086	-67.2593	-31.0617	3.49383	-57.716	-29.0988	8.82577	3.99934
1806	N#Cc1ccc(Nc2nc(Oc3ccnc4ccccc34)nc(N3CCN(Cc4ccccc4)CC3)n2)cc1C(F)(F)F	15	34.1945	620.835	7.88968	28	12	8	1	3	418.34	1840	10.4706	6.64744	6.53642	6.15206	3.35197	3.64316	3.26978	27.0588	28.2055	20.725	19.3086	20.4487	21.1854	244.12	212.415	189.211	198.991	196.531	166.759	148.585	159.536	158.567	165.256	169.091	164.593	167.702	159.61	79.3261	94.7638	58.1713	87.9144	14.7734	-98.7388	30.8045	36.449	6.86094	-2.35316
3004	COCC1=NNC(=O)C1SCc1ccccc1	10	12.7564	131.547	5.40999	6	5	2	2	0	129.531	928	7.24014	3.6087	2.21429	4.17843	2.83508	3.57609	2.81746	29.9355	28.5625	24.5333	17.4394	15.8043	11.5952	226.889	203.564	176.929	169.395	167.519	161.648	146.502	153.116	154.458	160.271	162.06	160.565	162.008	168.894	26.1443	-23.8963	-36.3746	18.5055	-15.6418	17.7372	-36.746	-20.7461	5.47242	-1.71488
3634	Cc1ccc(OCc2nnc(-c3cc(-c4cc(F)c(Cl)cc4Cl)nc4ccccc34)o2)cc1	8	26.3579	789.64	7.8655	27	8	3	2	3	218.705	1850	10.0655	6.67145	6.10867	4.46337	3.525	3.4113	3.64048	37.7551	31.3774	27.5714	26.1759	27.7957	25.8132	274.142	247.646	227.086	243.172	237.267	158.633	143.156	148.256	153.843	157.011	157.958	157.273	157.064	161.082	60.9328	17.4351	-37.3246	28.0173	72.4448	-53.5856	-53.7285	-5.75499	8.53519	-3.09538
2331	CCN1CCN(CC2SC(c3ccccc3C(=O)O)N(c3ccc(Nc4nc(Oc5cc(=O)n(C)c6ccccc56)nc(N(C)C)n4)cc3)C2=O)CC1	13	41.9997	2375.8	9.4408	28	15	9	5	0	411.087	2426	8.04728	5.02917	4.19121	4.37326	3.24947	3.43557	3.02611	25.8085	27.03	21.1822	19.1756	19.5042	17.907	225.922	210.344	183.299	191.595	197.375	163.144	148.224	158.463	156.687	160.028	160.587	161.857	159.579	158.98	145.046	105.475	15.2178	98.3057	83.2108	-77.9759	-57.4434	-110.142	25.5179	5.09303
390	Fc1ccc(NC2=Nn3c(nnc3-c3cc(F)c(Cl)cc3Cl)SC2)cc1	24	20.7415	325.258	6.74013	17	10	5	0	4	229.542	1826	11.933	6.42558	5.96815	6.55834	3.72752	3.39394	3.67827	52.1714	38.2895	35.7297	33.5286	36.1321	31.94	292.326	253.368	246.242	250.8	252.191	165.712	149.567	152.34	163.395	166.651	165.505	161.951	157.663	164.242	34.9305	6.09424	-67.6084	-14.8032	-10.7864	10.033	-6.34192	-35.7303	2.73633	-4.83755
1454	O=[N+]([O-])c1ccc(-c2csc(N/N=C(/Cn3nnc4ccccc43)c3ccc(Cl)cc3)n2)cc1	16.44	26.996	503.233	7.44483	26	11	7	2	1	259.509	1860	10.161	6.57823	5.61283	5.19017	3.03016	3.52343	3.06883	37.2	32.9259	24.8019	22.578	28.1224	28.1546	269.499	230.297	204.718	227.179	235.467	160	148.188	149.681	156.772	161.734	162.877	160.139	159.251	155.136	43.1412	-0.398025	-49.4079	-84.6884	17.6158	26.1995	-31.9793	-57.922	5.6224	-8.2384
1684	Cc1ccc(-c2c[nH]c(NC(=O)/C=C/c3ccccc3)n2)cc1	16	17.856	352.032	6.69663	17	4	3	1	0	156.167	912	7.45	4.38596	3.92727	3.90417	3.32685	3.32066	3.22222	22.8	25.0476	16.988	15.3494	17.2982	16.3273	238.039	198.974	173.64	186.61	186.368	159.297	145.469	149.683	155.172	159.44	162.404	161.929	161.422	161.672	35	-1	-40	30	27	-31	-24	-44	5.13625	-5.52313
1480	COc1ccc(Br)c(-c2nnc3sc(-c4ccc(N)cc4)nn23)c1	16	19.1085	218.398	6.26179	20	8	5	1	1	127.026	2378	9.37532	4.98035	4.30051	3.5285	3.22506	3.0109	2.92761	66.0556	36.5641	35.4286	32.3973	30.0408	28.8409	274.512	259.377	223.567	250.668	232.889	159.341	148.182	150.878	152.151	157.44	161.78	158.075	160.724	156.443	43.7545	5.08226	-6.51197	31.9385	26.6636	-34.5956	-78.0004	-86.5111	10.25	1.88889
3006	Cc1cccc(Sc2nc(SCc3ccc(Cl)cc3)nc(-c3ccccc3)c2C#N)c1	10	24.1391	427.674	7.18976	24	6	3	0	1	164.151	1866	7.3162	4.97685	4.00431	3.35002	3.16495	3.11544	2.85005	38.0816	32.0769	26.8738	26.8962	26.1667	23.1068	277.039	246.48	251.981	263.174	255.149	153.366	139.042	143.396	147.216	154.657	149.929	149.93	150.184	147.958	40.0983	-2.80439	15.0043	54.4816	43.3514	-50.3523	-112.036	-95.6921	7.85339	-1.02207
2327	Cc1cccc(Cc2nc3c(-c4cccc(F)c4)cnc(N4CCCC(C#N)C4)c3[nH]2)c1	13	25.4724	430.99	7.22924	21	6	5	0	1	236.528	1286	7.78571	4.76423	3.72519	4.22371	3.04524	2.97719	2.66751	22.9643	25.3167	17.8071	16.4667	18.2764	15.9084	234.84	201.074	201.207	188.928	205.678	162.401	145.368	152.02	157.447	162.705	160.132	163.601	158.819	157.725	71	25	0	21	-46	-34	-50	-50	11.0408	-0.428571
3050	Fc1ccc2c(c1)Sc1cccnc1N2CCCCN1c2ccc(F)cc2Sc2cccnc21	10	27.4724	265.412	6.80506	24	8	4	0	2	259.618	1826	8.94239	3.31963	4.07345	4.80774	2.54461	2.83549	2.68424	33.8148	31.5254	25.7895	23.6716	14.9041	16.3051	262.111	228.255	208.314	179.996	159.19	160.402	143.632	150.399	156.96	156.517	153.741	156.624	163.658	165.264	52.9034	20.1003	-26.4708	-137.307	-70.2237	-40.5746	39.6903	97.8397	10.6159	5.65158
1189	O=C(c1ccc(Cl)cc1)[C@H]1[C@@H]2C(=O)N(c3ccccc3)C(=O)[C@@H]2[C@@H]2C=CC=NN21	18	23.2868	402.119	7.06146	12	7	3	3	1	253.589	1436	9.41344	4.36566	3.87153	5.6353	4.11399	3.30655	3.18047	31.9111	29.2857	22.2917	22.4583	18.7	19.2708	259.951	219.834	218.007	212.3	196.086	157.92	143.646	148.096	156.757	158.144	156.927	155.971	157.74	158.836	33.751	-8.27639	-5.77348	7.38317	-10.3281	-45.2812	-71.6215	-44.9324	9.1042	1.01975
4278	CC1CCC2C(C)(C)CCC[C@]2(C)/C1=C/c1cc(O)c(O)c(C=O)c1OS(=O)(=O)O	0	23.5221	329.377	6.89581	6	8	0	7	0	359.952	1526	6.94074	3.05714	2.33905	5.9992	3.34336	3.26922	3.6511	25.4333	28.2903	17.5417	14.4323	16.7943	17.0571	206.023	198.906	144.976	132.023	163.187	162.375	143.72	150.907	150.99	157.678	159.715	165.535	159.772	159.991	43.7077	145.614	34.0393	127.825	214.297	207.348	-23.7932	-182.456	18.4756	-0.00555556
3788	Cc1cc(O)n2nc(N3CCOCC3)c(C#N)c2n1	7	14.8658	128.1	5.49466	9	7	5	2	0	160.389	818	9.625	2.89362	1.94872	5.01215	4.1935	4.16312	2.80769	25.5625	27.6176	21.1831	19.7639	15.1489	10.359	222.989	201.201	182.689	174.99	158.798	167.268	152.388	162.24	165.618	163.438	165.865	167.673	169.566	162.423	57.625	35.1875	19.4375	29.75	-91.8125	-148.812	-134.562	30.4375	9.9707	6.10449
1972	CC(=O)OCc1ccc(/C=N/Nc2cc(C(F)(F)F)nc3c(C(F)(F)F)cccc23)o1	14	24.2623	2050.74	8.75736	15	12	3	3	6	554.347	1522	15.8182	11.7831	7.82258	12.5988	6.61494	12.0308	4.85372	34.5909	32	26.9419	25.8602	28.3253	22.8226	247.552	231.632	210.903	205.659	188.799	177.828	152.181	166.852	164.011	170.513	171.56	176.597	190.244	166.99	59.6281	91.4587	-58.5826	-3.54339	58.9008	-44.3822	38.0888	-18.5289	1.19731	2.17975
2495	O=C(O)c1ccc(NC(CC(=O)c2cc3ccccc3oc2=O)c2ccc(F)cc2)cc1	12	25.0935	406.237	7.17009	22	7	1	5	1	367.306	1368	10.48	5.69565	6.15044	7.34611	4.01232	3.9628	4.29744	27.36	27.7925	20.8034	18.7236	19.4696	19.9558	252.995	218.029	192.079	206.435	208.828	158.809	142.887	146.171	154.353	157.937	157.449	156.429	155.891	156.381	35.2912	0.3344	-58.4432	-40.7008	17.4384	-14.504	-78.584	8.6352	5.4528	-9.6464
4067	C=C1CC[C@H]2[C@@](C)(CC[C@@H](O)[C@@]2(C)CO)[C@@H]1C/C=C1/C(=O)OC[C@H]1OC(=O)CCCCC1CCSS1	4	27.9648	26830.5	11.4782	0	8	0	6	0	310.715	1946	5.16524	2.41013	2.27136	3.98353	2.32425	2.77758	2.87997	24.9487	25.8765	15.1834	12.4437	14.951	13.9799	200.717	174.265	129.2	123.398	152.803	162.104	143.369	150.706	154.488	159.229	162.733	166.33	160.248	164.714	74.0169	40.2792	-24.8154	-61.4244	73.9567	115.025	-18.3254	-171.582	20.1775	-7.61538
711	Cc1cc(=O)oc2cc(Oc3nc(Nc4ccccc4)nc(N4CCCCC4)n3)ccc12	21	25.5533	394.274	7.1402	22	8	5	3	0	210	1324	8.54545	5.70297	5.00901	3.81818	3.51688	3.17382	3.07482	24.0727	26.4576	18.4351	17.8692	20.9505	19.5586	231.729	193.854	187.393	204.863	213.465	161.977	146.935	155.249	159.002	163.721	165.444	164.038	162.636	156.167	92.5385	108.202	64.0136	50.9835	-75.0559	-81.477	-160.034	-74.3881	8.93388	3.23967
2087	O=C(COC(Cn1nnnc1Cc1ccccc1)c1ccc(Cl)cc1)NNC(=S)Nc1ccccc1	14	27.8245	1528.98	8.61329	23	11	7	2	1	222.463	1940	8.00082	4.95108	4.7683	3.70772	3.19714	3.27059	3.29676	32.3333	28.6825	20.3233	18.4571	20.1343	20.9845	242.844	197.035	186.204	193.566	188.388	162.216	149.81	153.448	159.248	162.438	164.255	164.705	164.781	163.484	45.2387	-50.3155	-57.5871	9.87929	60.059	-46.2524	-28.2977	-1.58025	3.97	-10.73
4378	O=c1[nH]c(/C=C/c2ccccc2)nc2sc3c(c12)CCCC3	0	17.6253	482.21	6.96684	15	4	2	1	0	137.115	1082	7.06433	3.67925	3.34694	3.60828	3.15149	2.84871	2.6746	28.4737	28.122	19.7419	20.1512	18.6604	18.449	247.906	203.342	183.745	191.521	198.742	156.743	141.904	146.484	154.022	154.788	159.08	162.156	156.64	153.013	37.871	30.3066	37.1893	8.14712	-48.0385	-91.8249	-40.177	-9.95045	6.89197	3.86427
201	CC(C)(O/N=C(\C(=O)N[C@@H]1C(=O)N2C(C(=O)O)=C(C[n+]3ccccc3)CS[C@H]12)c1csc(N)n1)C(=O)O	27	28.9423	1130.96	8.33916	11	15	6	7	0	417.736	2069	9.81481	5.91946	4.79756	6.96227	4.18342	4.97786	3.9394	34.4833	31.7619	25.0152	22.4868	25.396	23.8356	236.675	213.374	207.379	210.278	202.754	163.714	150.001	154.758	158.192	165.106	160.221	159.5	163.225	160.362	80.843	67.3091	-31.9467	-32.1368	-36.6277	-24.4365	-118.143	15.7106	15.0408	-8.10111
55	CC(=O)NC[C@H]1CN(c2ccc(N3CCN(C(=O)OCC4=C(C(=O)O)N5C(=O)[C@@H](NC(=O)Cc6ccccc6)C5SC4)CC3)c(F)c2)C(=O)O1	33	39.3901	35120.5	12.076	12	17	6	9	1	577.337	2430	9.67582	5.65201	5.22816	6.7922	3.92631	3.96586	4.41211	28.5882	28.4444	20.8317	19.7229	20.7363	21.5508	226.414	199.345	173.579	168.162	187.744	164.75	148.723	157.504	160.201	161.711	164.213	166.553	163.383	160.984	107.385	35.9925	-114.732	-104.676	-68.2056	36.5827	83.784	-40.2455	15.3149	-5.50865
1641	Nn1c(Sc2ccc(Cl)cc2)nnc1-c1ccccc1	16	15.6538	150.997	5.71041	17	6	4	0	1	101.12	1256	7.93708	3.29716	3.21569	3.26193	2.9893	2.45966	2.42417	40.5161	33.2121	28.4194	23.2414	20.9767	23.7059	269.199	231.784	220.383	199.825	190.493	159.021	147.823	148.942	153.041	160.948	164.307	164.041	160.456	152.5	20.9993	-2.13052	6.83313	-9.23554	-41.576	-48.2546	-9.09544	-4.53411	5.36004	-2.49636
2235	Brc1ccc2c(c1)Sc1cccnc1N2CCCCCCN1c2ccc(Br)cc2Sc2cccnc21	13	28.8866	308.914	7.014	24	8	4	0	2	142.386	4190	6.55039	1.51443	1.63231	2.37309	2.00508	1.85339	1.78536	69.8333	34.8923	28.3841	29.5789	20.8528	19.1159	269.635	223.537	203.317	182.9	169.251	155.45	141.755	148.533	154.145	154.843	153.061	155.834	157.49	157.671	55.9315	38.8197	33.333	-72.7664	-116.622	-127.229	-72.964	-12.631	11.8722	8.09778
119	Cc1ccc(-n2nnc(C3=NNC(c4ccc(F)cc4)C3)c2C)cc1	30	19.925	217.182	6.29703	17	6	5	0	1	182.722	1028	8.46512	4.57746	3.70588	4.24935	2.76993	3.31455	2.74428	23.907	26.1739	19.125	16.6827	17.9296	15.6912	232.557	206.113	171.322	170.06	188.19	165.055	149.087	153.567	159.488	164.465	165.571	166.761	165.254	161.118	70.4446	23.1168	-73.5181	-52.5419	-16.8031	-15.1017	-37.9205	-46.6209	10.8615	-4.08816
3083	Cc1ccc(-c2c[nH]c(NC(=O)c3[nH]ncc3-c3ccccc3)n2)cc1	10	20.5631	206.796	6.28725	22	6	5	1	0	172.972	1046	8.4186	4.74286	4.50794	4.02261	3.46053	3.27698	3.15697	24.3256	26.5652	19.4	18.7447	17.6143	17.0635	242.598	213.587	184.731	188.22	187.152	160.957	148.252	151.212	154.92	159.708	163.689	165.783	163.85	162.386	42.2666	10.9102	-15.0243	47.5792	6.40617	-35.0206	-37.391	-37.9589	8.5219	-3.13413
3791	O=c1cc(-c2ccc(O)c(O)c2)oc2cc(O[C@@H]3O[C@H](CO)[C@@H](O)[C@H](O)[C@H]3O)cc(O)c12	7	25.1505	281.482	6.80322	16	11	0	11	0	417.889	1480	10.8846	6.72642	6.55238	8.03632	4.49074	4.71279	5.01878	28.4615	28.4	23.4615	20.7536	21.3962	20.781	228.766	205.88	174.368	191.32	196.395	161.558	147.207	149.184	157.714	161.215	162.292	158.883	157.141	160.02	4.75	-24.75	-0.5	-2	-20.25	41.75	8	-43.25	11.2175	-6.28846
3434	N#CC1CC(C#N)C2NC(=O)C3C(c4ccccc4)CSC3N2C1=N	9	19.6538	220.089	6.31032	6	7	5	1	0	229.67	1230	7.86772	3.5125	3.63793	5.46834	4.11908	3.33519	3.89368	29.2857	28.7111	20.459	21.4318	14.425	14.8103	242.416	205.296	185.647	170.406	162.133	161.307	145.412	148.805	156.664	161.327	159.249	163.547	163.749	163.433	28.2079	-12.6536	-52.6193	-47.4255	25.1892	24.4248	-17.3547	-20.7662	8.7534	-2.39909
4056	Brc1ccc2nc(NC3OCCc4ccccc43)sc2c1	5	16.9586	125.951	5.57783	15	5	2	1	1	92.9984	2232	7.45623	4.28704	3.27601	2.73525	2.24611	2.40246	2.37283	65.6471	34.7297	26.4177	29.5921	24.3542	28.2619	270.105	220.856	183.862	197.945	222.336	155.514	142.289	147.855	152.819	156.151	161.038	158.174	152.651	146.521	19.2956	-20.9906	-17.2058	-24.6704	12.9223	18.8178	-13.8955	-57.2668	4.2154	-0.506055
3973	COc1ccc(-c2nc3sc(-c4ccccc4)nn3c2-c2nc3ccc([N+](=O)[O-])cc3[nH]2)cc1	5	27.4724	478.32	7.39405	29	10	6	3	0	264.253	1622	10.7689	7.57706	7.0378	5.28507	3.62919	3.22966	3.39544	32.44	31.9636	26.4095	25.0909	26.4194	25.8351	267.352	248.232	232.545	247.233	256.455	158.657	146.684	149.478	153.544	158.723	159.526	157.533	153.844	153.098	54.328	21.4197	-1.46756	-8.38844	31.5545	-14.5954	-75.0876	-62.8795	11.832	4.2816
4189	Cc1nc(NC2OCCc3ccccc32)sc1-c1ccccc1	3	18.3324	152.62	5.86086	17	4	2	1	0	108.865	1120	6.64499	3.08571	3.06557	2.65523	2.21274	2.28095	2.34123	27.3171	27.5682	20.2796	19.7368	16.1286	15.4262	241.613	209.927	182.532	174.371	182.439	157.387	142.674	149.101	153.329	153.894	159.121	160.196	158.376	151.751	35.0038	-14.5708	-34.8513	-28.2968	-5.38145	13.6526	-27.766	-43.5146	8.76919	1.66865
3424	Cc1ccsc1-c1c(C#N)c(N)nc2c1CCCC2	9	14.8254	106.798	5.3128	11	4	3	0	0	123.115	958	6.54248	0.303797	0	3.62102	2.98527	2.48898	1.39362	28.1765	27.5556	20.2875	21.0241	6.97468	2.42553	239.58	214.974	216.942	174.509	103.175	159.316	143.77	148.212	153.598	153.544	152.599	155.534	171.025	178.018	50.5702	53.3883	20.336	-21.897	-97.3895	-111.681	-71.2334	88.9708	12.1211	6.97664
523	O=c1cc(Oc2nc(Nc3ccccc3)nc(N3CCN(c4cccc(Cl)c4Cl)CC3)n2)c2ccccc2o1	23	31.1982	423.7	7.41	28	11	6	3	2	231.927	2094	9.16738	6.28682	6.27257	3.80209	3.29102	3.08213	3.18498	34.3279	30.197	25.0556	22.7103	22.3721	23.7656	256.71	218.851	202.915	204.484	210.477	160.304	146.658	154.706	158.606	160.444	162.448	163.097	164.183	157.305	72.8823	51.1591	9.47347	21.7984	-26.9171	-33.5714	-52.7367	-44.7291	8.30825	-1.16931
36	CN1CCN(Cn2nc(-c3ccncc3)n(N)c2=S)CC1	35	16.4299	178.806	5.92824	11	8	7	0	0	110.264	1086	6.61111	2.18095	1.96111	2.75659	2.44469	2.23942	2.29877	27.15	26.381	19.7849	14.3028	16.3143	13.8167	209.907	186.001	152.946	177.639	154.846	168.694	156.015	167.577	161.795	167.753	173.792	163.383	167.15	165.375	54.3772	-5.94833	-9.46194	37.5669	-3.46194	-44.9903	-41.6028	-39.6944	9.65625	-3.09375
3715	Clc1ccc(OCc2ccccc2COc2ccc(Cl)c3cccnc23)c2ncccc12	7.5	25.3915	236.551	6.62932	26	6	2	2	2	152.399	1758	8.3442	4.80212	4.40808	3.04799	2.43173	2.57652	2.71294	35.16	29.7778	25.5586	23.4912	20.1143	20.2364	269.966	241.606	192.892	213.515	220.178	155.097	140.98	146.553	150.917	154.077	158.844	151.706	151.796	154.565	38.5861	-21.0872	-3.2817	-61.6783	-67.4126	0.124444	20.8631	-45.5548	9.16	-2.48
4212	COc1ccc(C2CC(=NOC(=O)c3ccc(C)cc3)CC(c3ccc(OC)cc3)N2C)cc1	2	26.2889	585.758	7.59668	18	6	2	4	0	223.028	1392	7.1875	3.98026	3.86928	3.48481	2.64949	2.91155	2.85076	21.75	24.2985	18.4414	14.7159	16.4737	16.1765	220.987	208.332	159.787	171.347	181.389	160.345	144.223	153.296	153.025	157.887	160.896	159.808	158.854	158.548	90.418	-8.08203	-79.2148	-42.6875	61.3789	-25.9492	-79.2188	-32.7461	16.9219	-5.82812
1721	Cn1c(N2CCOCC2)nc(-c2ccc([N+](=O)[O-])cc2)c(C#N)c1=O	16	19.2464	206.773	6.24791	12	9	5	4	0	296.944	1092	10.95	4.86207	4.78947	7.42361	3.70526	3.99489	3.7489	27.3	28.5238	22.2418	20.3469	17.2644	16.1711	233.117	215.155	200.106	183.943	174.066	165.012	150.258	159.689	158.928	165.752	159.835	161.245	162.647	162.085	63.105	41.18	1.5775	-69.505	-53.5175	-69.6625	-22.5325	87.64	10.2762	0.895
38	CC1=C(N)C(=O)C(C(C)(C)CC(=O)N2CCN(c3cc4c(cc3F)c(=O)c(C(=O)O)cn4C3CC3)CC2)=C(C)C1=O	35	32.5633	806.853	8.10413	10	11	4	6	1	491.979	1774	8.72973	3.18468	2.6601	6.64837	3.33506	3.55643	2.98755	23.973	25.2821	20.8486	18.0129	13.7748	12.7783	218.648	217.444	167.257	152.333	146.934	164.423	147.144	155.574	156.018	158.22	162.14	166.077	166.145	166.665	135.787	105.777	-20.2973	-129.749	-198.196	2.17677	64.4324	11.9321	26.916	-2.43262
1506	Nc1nc(COC(=O)c2ccc(Cl)cc2)cs1	16	13.0157	76.1038	4.86273	11	6	2	2	1	133.62	1176	9.07882	4.4127	3.00412	5.13922	3.1772	3.45437	2.83295	45.2308	34.963	25.8511	22.2	26.2143	24.963	267.638	220.388	207.664	201.67	222.256	158.764	145.875	149.693	155.549	159.56	160.508	159.677	156.014	157.244	16.2808	-5.87647	-19.5332	-40.8052	9.86595	-3.64431	-9.45263	-22.9822	2.22633	-4.76331
739	O=C(O)CNC(=O)c1ccc(NC(=S)Nc2ccc(S(=O)(=O)Nc3ccccn3)cc2)cc1	21	25.4021	958.518	8.05931	18	12	5	5	0	359.258	1852	9.59402	4.58454	4.34091	6.9088	3.76823	3.61747	3.46352	35.6154	34.2593	23.9912	23.3333	21.9783	23.0795	249.549	210.772	201.313	204.372	201.153	161.043	148.162	152.047	157.857	161.109	159.234	157.554	157.249	158.894	-5.11111	-2.77778	-75	-36.2222	36.4444	7	-68.2222	7.88889	2.22411	-9.70932
209	O=C1C(Cl)C2(C(=O)Nc3c(Br)cc(Br)cc32)N1c1ccccc1[N+](=O)[O-]	27	20.7423	260.037	6.51634	12	10	3	4	3	285.669	3726	12.4041	6.51088	3.98013	8.40202	5.74275	6.21723	3.78154	109.588	43.4324	43.9625	56.5529	46.6032	46.8537	309.742	280.65	264.011	261.14	226.505	156.79	145.805	146.629	153.165	155.594	155.591	156.747	161.354	160.367	23.1324	25.4542	-3.81343	-29.0088	-34.6035	-36.746	-25.388	-14.481	8.71626	2.44637
1004	Cn1c(=O)c2c(n(C)c1=O)n1c(SCc3ccccc3)nnc1n2C	19	19.9011	624.261	7.35286	18	9	6	2	0	202.115	1270	9.42547	3.62222	3.89231	4.92962	3.30703	2.70025	2.89658	30.9756	30.5682	28.3372	23.7843	16.12	16.4769	238.123	240.561	197.399	175.295	168.879	164.221	150.763	161.528	153.545	166.352	162.758	165.491	164.792	165.018	91.2777	93.1181	-14.2278	-131.949	-92.2944	-13.1682	-2.1312	-54.9574	18.3492	8.90065
770	O=C(c1ccncc1)N(/N=C/c1c[nH]nc1-c1ccc(Cl)cc1)C(=O)c1ccc(Cl)cc1	21	24.9437	256.842	6.71161	23	9	5	2	2	234.872	1794	9.77042	6.86909	5.56863	4.99727	4.00812	4.04977	3.32881	38.1702	31.5	25.8878	24.5833	26	24.0882	273.711	236.969	231.163	237.361	233.634	158.584	145.953	149.409	154.499	160.429	161.329	156.501	156.292	152.954	31.6759	-6.78625	27.4476	-7.89085	-47.173	-47.402	-5.86778	-31.0801	5.93979	-6.84201
3081	Cc1ccc(-c2cc(-c3c(-c4ccccc4)[nH]c4ccccc34)c3c(N)ncnc3n2)cc1	10	26.7249	390.992	7.16261	31	5	5	0	0	167.583	1274	7.92593	4.84472	3.46061	3.1034	3.01604	2.99517	2.80303	23.5926	26.2881	21.0574	19.6716	18.9752	15.497	254.219	241.859	230.34	245.168	218.254	157.217	144.052	146.77	149.634	153.764	154.018	149.966	153.947	159.289	57.7764	37.8848	18.1221	31.4966	18.7915	-25.3649	-137.578	-149.823	16.0778	6.05761
792	FCCCCSc1nnc(-c2cccc(-c3cccc(Cl)c3)c2)o1	20	18.4133	398.208	6.86244	17	6	2	1	2	170.148	1452	8.00123	4.93409	4.14256	4.25369	2.88444	3.46561	3.02411	36.3	30.5952	21.5116	20.8902	24.1356	23.8491	252.536	205.388	207.501	217.877	206.734	160.699	143.482	150.127	155.381	159.419	159.806	156.502	161.542	160.299	43.3484	29.0099	28.0279	-25.7454	-65.4537	-54.9674	-36.052	-25.286	4.78	2.5
3559	O=C(c1cccnc1Nc1nc2ccc([N+](=O)[O-])cc2s1)N1CCN(CCO)CC1	8	23.4605	384.15	7.04965	15	11	6	4	0	310.392	1510	9.36889	4.77211	4.61172	6.20785	3.40339	3.06614	3.43966	30.2	29.6792	20.9492	19.8016	19.0102	19.8462	231.814	199.34	175.291	185.44	186.769	164.48	150.52	158.011	161.136	162.09	164.602	164.718	163.185	158.518	48.3676	16.506	23.4459	5.55662	17.6958	25.4597	2.66009	-22.0852	8.5552	-0.5456
3153	COc1ccc2nc(C)cc(-n3cc(CN4CCN(c5ccc(C)cc5)CC4)nn3)c2c1	10	25.5129	792.941	7.8389	21	7	6	1	0	160.722	1286	6.96667	2.928	2.74336	2.6787	2.44751	2.31733	2.23525	21.4333	24.6875	17.7482	14.7654	13.824	13.8584	218.909	202.288	162.615	160.011	158.754	163.341	148.118	157.821	158.156	159.67	162.818	165.86	165.894	160.176	98.56	7.68	-66.24	16.88	29.92	-75.4	-69.6	-27.68	15.7778	-1.22222
3626	Cc1cc(-c2cccs2)n2nc(-n3nc(C)cc3-c3cccs3)cc2n1	8	21.1893	206.166	6.28419	24	7	5	0	0	117.062	1456	8.2168	3.44048	3.00952	2.85518	2.59617	2.3908	2.31781	35.5122	32.9778	25.5926	27.8675	18.9643	21.6571	266.42	234.585	243.412	203.121	189.517	157.408	144.976	150.142	158.032	154.471	153.666	157.791	160.079	159.48	67.9593	58.7373	-11.6809	-9.72021	-78.4025	-45.5415	-76.8198	-59.6285	12.5068	6.54729
4453	Cc1ccc(S(=O)(=O)ON2C(=O)CC2CBr)cc1	0	13.8292	105.892	5.25021	6	7	1	4	1	211.1	2194	9.05039	2.25132	1.31231	7.03667	4.61636	3.66093	2.23574	73.1333	42.2581	31.5484	30.125	23.1429	21.8108	248.025	207.138	200.51	223.372	180.685	160.456	143.772	153.573	157.593	161.299	163.023	155.754	158.577	163.539	12.6683	63.5142	13.2056	-10.2259	4.25261	-112.246	-105.305	-2.35112	4.77778	-4.11111
4124	Cc1cccc(NS(=O)(=O)c2ccc(NC(=O)c3cn(CCO)c4c(cc(Cl)c5ncccc54)c3=O)cc2)c1	4	30.7759	3013.48	9.37183	26	11	4	5	1	376.249	2092	9.19434	4.56757	4.74133	6.06854	3.96669	4.25325	4.02389	33.7419	32.7273	25.4138	24.0823	20.6689	20.008	253.699	233.511	214.515	203.543	187.662	158.888	144.41	149.93	153.639	157.398	155.979	157.144	160.718	158.925	26.7617	44.9912	22.2141	16.4428	-83.1714	-36.4059	-132.112	12.6128	13.0083	2.58377
2126	CC(=O)Nc1ccc(F)cc1Sc1ncccc1[N+](=O)[O-]	14	15.982	120.409	5.53283	12	8	3	3	1	299.115	1154	12.2079	7.50877	6.25532	9.64886	4.8046	6.17446	7.69149	37.2258	33.5312	30.1	31.9483	22.6667	19.6383	257.08	236.257	237.681	210.455	185.758	164.466	148.983	152.116	159.849	158.212	155.895	160.879	167.997	176.346	32.6667	4.77778	-54.4444	5.77316e-15	-3.55556	1.77778	22.6667	-65.1111	3.90531	0.0718002
4113	O=C(Nc1ccc(S(=O)(=O)Nc2ccc(Cl)cc2)cc1)c1cn(CCO)c2c(cc(O)c3ncccc32)c1=O	4	30.7759	3199.69	9.43179	26	12	4	6	1	406.249	2118	9.90082	5.12665	5.05067	6.77082	4.16134	4.58665	4.3939	35.3	33.7812	25.7801	24.1667	21.5944	19.664	257.668	234.152	214.006	201.618	188.922	158.998	145.054	149.376	154.489	157.511	155.414	157.837	160.424	161.459	8.33059	29.4115	28.5062	8.74897	-91.3032	-99.5514	-67.1289	24.7558	10.6878	0.0458333
919	CN1C(=O)C2C(c3cccs3)CNC2N(C)C1=O	20	14.2562	103.697	5.22926	5	6	3	2	0	163.587	978	7.46801	1.38095	1.33333	4.95717	2.56548	2.3276	2.82716	29.6364	28.6571	20.3333	19	14.2619	8.07407	221.453	195.412	155.963	119.535	142.119	163.856	148.714	159.24	156.522	165.506	159.768	170.944	162.939	161.392	40.8165	24.7188	-36.7218	-88.3368	-49.3446	15.5786	5.68962	-5.11295	11.5556	-0.555556
3121	Cc1ccccc1OCc1ccccc1-c1nnc(SCc2ccccc2)o1	10	21.9084	362.204	6.92183	23	5	2	2	0	142.865	1330	7.50926	4.88608	3.82576	2.97634	2.72318	2.78856	2.662	27.7083	28.0196	21.1313	18.0935	22.1772	17.5568	247.474	215.666	186.259	207.245	230.772	156.569	141.905	147.172	149.854	157.637	160.354	157.749	149.869	153.617	56.1042	12.6566	-33.2662	-29.6304	30.4468	9.82639	-48.2724	-45.5062	8.46354	-2.8559
2641	CC(=O)NC12C=CC(=O)C=CC1c1c(cc(O)c(O)c1O)CC2C	11.9	18.8251	166.248	5.98895	6	6	1	5	0	286.062	1036	8.37209	3.14286	2.96552	6.65262	3.66986	4.67832	5.3477	24.093	25.0889	20.5345	16.6871	12.4732	12.0862	221.841	220.249	169.584	145.155	118.521	161.261	145.626	148.34	153.093	156.466	158.3	162.803	169.575	172.742	47.3532	28.3083	-42.4932	-62.9843	-38.8231	-18.5868	20.8935	-35.3164	15.1736	0.375338
1269	Cn1c(N2CCN(Cc3ccccc3)CC2)nc(-c2ccccc2)c(C#N)c1=O	18	22.6036	512.262	7.30355	18	6	5	1	0	207.167	1160	7.38462	2.58955	2.38596	3.98397	2.93223	2.68159	2.44347	22.3077	24.9818	18.1984	16.0426	13.0522	12.1667	228.63	200.073	184.552	171.567	155.657	161.751	146.33	156.885	156.736	163.959	159.93	160.203	163.653	161.863	63.9408	21.9467	28.8225	11.3728	-30.2781	-104.089	-80.5148	-12.1716	12.2245	-1.46191
2977	NN1C(=O)C2=NN=C(c3ccc(Cl)cc3)C2=NC1=S	10	15.0442	126.55	5.48249	6	8	5	1	1	140.936	1256	11.762	5.23556	3.73099	5.63743	3.7192	4.14601	3.9073	50.24	36.8148	35.28	31.75	38.64	30.2105	295.156	269.875	248.081	252.848	248.125	160.855	151.71	152.606	155.873	160.681	161.98	157.919	157.493	163.589	22.8842	17.5966	37.3472	-1.20913	-53.8273	-61.6019	-45.3788	-22.1479	5.1328	-2.2912
1864	CCOc1ccc(S(=O)(=O)N2CCOCC2)cc1-c1nc2ncccc2c(=O)[nH]1	15	22.7697	233.295	6.51702	16	10	4	5	0	278.549	1476	9.35601	4.35673	4.8381	5.68468	3.8348	3.06939	4.68192	30.1224	32.7115	23.9035	22.8291	20.6316	21.019	231.03	211.141	197.104	190.101	184.167	163	146.813	157.549	158.371	160.104	158.785	160.408	160.432	164.503	36.6789	67.3683	46.1763	-66.0179	-46.0582	82.0851	-38.4881	-144.543	11.6735	5.57143
580	COC(=O)CNC(=O)CNC(=O)c1cc(-c2nc3cc([N+](=O)[O-])ccc3[nH]2)ccc1O	22	23.7887	1880.16	8.67051	15	12	5	7	0	416.056	1394	11.7917	6.27778	6.47059	8.66782	4.72971	4.60648	4.75817	29.0417	29.22	22.94	20.6415	20.1	20.3765	235.553	215.536	186.259	202.632	190.767	164.73	151.725	155.85	159.246	163.452	165.187	160.663	161.679	164.005	47.9062	12.2656	-102.438	-101.094	96.6875	3.89062	-38.0938	46.3281	8.0217	-4.78776
4105	c1ccc(CN2C(c3ccccc3)C3=C(NOC3c3ccco3)C3CCCCC32)cc1	4	25.0919	416.037	7.16218	17	4	2	2	0	147	1226	6.20339	2.55411	1.84615	2.49153	2.23511	2.24242	2.13084	20.7797	24.1406	15.9018	15.6022	13.5541	10.9774	224.148	188.046	191.323	183.7	172.427	159.229	143.668	149.198	155.509	159.437	156.647	156.031	156.06	158.708	51.9779	4.41224	23.3941	38.6449	-37.1112	-99.4194	-104.368	-75.9506	12.7874	5.10198
2214	CC(=O)NNC(=O)c1ccc(-n2c(-c3ccccc3)nc3c(Br)cc(Br)cc3c2=O)cc1	13	25.0816	780.424	7.82299	22	9	4	3	2	269.323	3682	9.71113	4.50617	4.15716	5.6109	3.54295	3.10637	3.2339	76.7083	35.2353	32.6981	42.4019	29.9298	28.7568	276.406	246.064	247.694	247.933	229.525	157.404	145.322	149.171	154.455	158.016	155.054	150.769	149.869	157.329	48.6194	27.5458	-3.82524	-22.0524	-76.5431	-143.277	-43.0277	95.1133	9.50521	1.47569
2401	Cc1cccc(NC2=Nn3c(nnc3-c3cc(F)c(Cl)cc3Cl)SC2)c1C	12	21.4771	274.17	6.607	17	9	5	0	3	177.32	1822	9.21108	4.52895	4.31972	4.32487	3.07461	2.55898	2.7008	44.439	34.1591	32.5465	27.234	29.7183	24.5294	269.678	251.941	191.529	222.53	224.409	162.794	147.877	152.459	157.085	161.513	167.137	161.739	158.598	160.437	71.256	45.5788	-59.3825	3.56618	65.4416	37.9692	-0.518166	7.97316	11.2362	-1.87924
482	Fc1ccc(Cn2c(-c3ccc(-n4cncn4)cc3)nc3c(F)cc(F)cc32)cc1	23	24.1272	413.768	7.12392	26	8	5	0	3	316.25	1294	12	6.80808	6.91398	7.1875	3.65127	3.98092	4.63262	29.4091	29.8958	23.2268	21.5825	21.3131	21.043	261.369	232.17	221.319	221.943	214.444	166.936	148.25	154.672	159.696	164.006	158.877	158.732	159.189	168.715	40.2066	-23.3802	-65.1488	1.84298	-15.3802	-47.2149	24.9091	-28.9008	6.07438	-4.41322
354	Fc1ccc(/C(Cn2cncn2)=N\Nc2nc(-c3ccc(F)cc3)cs2)cc1	24.12	22.0582	224.191	6.44212	22	9	6	0	2	254.365	1410	10.8201	6	6.38235	6.0563	3.64035	3.58064	3.62155	33.5714	31.9333	22.9048	21.9286	25.5823	24.1912	259.351	218.039	205.257	216.598	211.013	166.186	149.734	155.409	161.429	163.759	163.823	164.122	165.587	162.493	31.7362	-43.744	-100.519	-38.1217	62.6505	9.66037	-41.6362	19.2658	3.15646	-8.0907
4000	COc1ccc(C(=O)CC(=O)c2ccc(O[C@@H]3O[C@H](CO)[C@@H](O)[C@H](O)[C@H]3O)cc2O)cc1	5	24.4149	526.632	7.42965	12	10	0	10	0	403.583	1456	9.53571	5.07619	4.95327	7.20685	4.43067	4.25661	4.43069	26	26.4483	21.194	18.6643	18.9143	17.4486	218.344	195.296	157.449	171.306	189.26	162.179	146.403	151.736	158.042	160.439	163.383	161.509	157.223	159.621	24.7347	-43.7857	-46.9184	-39.5051	23.0918	65.3418	-74.8214	2.84184	11.7551	-7.92857
1260	O=C(NO)c1ccc(Cl)cc1	18	7.95651	39.0224	3.75945	6	4	1	2	1	123.394	724	9.50617	0.777778	0	7.25848	3.70422	2.61728	1.34568	42.5882	31.7059	25.5806	20.8462	32.2	17	254.776	213.245	146.13	134.643	126.46	161.61	149.637	149.424	155.771	164.037	171.468	173.985	175.178	176.34	2.37908	-11.0004	2.85027	-25.4237	-11.8736	-1.41706	6.56521	3.65509	1.76471	-3.94464
1171	O=C(O)/C(Br)=C/c1cn(-c2ccccc2)nc1-c1ccc(Br)cc1	18	18.6606	192.134	6.13366	17	6	2	2	2	175.712	3336	8.94818	4.4709	3.86473	4.88089	3.55401	3.10847	3.60507	92.6667	37.1842	35.3333	28.2466	38.5	33.0725	286.737	240.4	241.572	241.852	242.064	154.828	142.81	145.128	152.179	156.225	154.211	152.608	150.035	152.391	21.0926	1.10418	-22.8535	-16.4283	-15.1971	-11.3535	-14.5454	-16.8563	4.4321	-4.30864
3570	COc1cc2nc(Sc3cnc(N)s3)n(Cc3ccccc3)c(=O)c2cc1OC	8	22.644	318.854	6.82944	21	9	4	3	0	197.59	1638	8.82742	4.53939	4.33333	4.20405	3.29595	3.25275	3.16205	34.8511	32.2	27.837	25.7767	23.3364	22.8866	252.039	245.881	218.59	227.975	210.964	159.157	145.795	153.221	150.133	155.634	156.923	153.198	158.365	152.867	52.2125	3.0665	0.66053	-35.6272	39.1503	-17.2469	-116.22	-77.4187	14.2594	5.53554
2606	Nc1cc(-c2ccc(Cl)cc2)nn1-c1nc2ccccc2nc1Cc1ccccc1	12	24.0582	329.599	6.89649	27	6	5	0	1	150.061	1416	7.99177	4.58621	3.59517	3.12627	3.05823	2.87167	2.70785	29.5	28.0962	21.8879	19.7963	19.7845	17.4696	259.259	223.69	222.75	226.408	213.577	158.249	145.285	147.886	156.849	160.121	159.196	157.931	157.396	155.215	46.5356	19.9303	8.51824	2.26312	-27.2288	-74.9921	-70.2074	-94.4641	8.92361	-1.85417
1934	NC1=C(Cl)C(=O)c2ccccc2C1=O	15	10.8015	59.4572	4.42173	6	4	1	2	1	154.478	832	10.6802	0	0	7.72388	3.04475	1.66821	1	41.6	32.0952	33.4762	28.4	5	1	280.087	263.667	182.77	132.617	70.7419	156.388	143.756	143.151	150.534	157.042	163.083	169.786	177.487	184.918	14.8801	16.7725	2.68864	-47.1185	-59.564	-9.14765	28.3052	13.4047	6.04	-1.68
2935	Cc1cccc(OCc2ccccc2-c2nnc(-c3cccc(Br)c3)o2)c1	10	21.3107	317.743	6.7545	23	5	2	2	1	137.106	2260	8.25153	4.78996	4.1062	3.11605	2.82466	2.64397	2.72308	51.3636	30.4043	24.2283	22.1237	21	21.9157	260.65	224.747	197.17	227.874	225.806	156.046	142.075	147.159	150.09	157.989	162.359	154.12	149.977	151.022	52.553	21.1114	8.63995	5.53194	-47.1455	-34.1192	-15.7297	-46.2061	7.4375	-2.25
2169	NC(=S)n1nc(Nc2ncc(-c3ccccc3)[nH]2)cc1-c1ccccc1	14	20.5631	251.709	6.48379	22	7	6	0	0	135.625	1250	8.01058	4.30556	4.36979	3.22916	2.84172	2.82845	2.88387	29.7619	28.3778	21.2386	21.5795	20.4028	19.9688	252.401	215.156	200.085	193.645	187.778	160.537	149.956	151.173	157.75	158.769	162.178	163.025	163.008	162.023	33.6629	7.46611	-21.1744	-6.81456	-25.4442	-27.5306	5.82464	-27.9695	7.5034	-1.30839
3474	N#Cc1c(Cl)c(Cl)c(Nc2ccc(Nc3cccc(Cl)c3)c3c(=O)[nH]cnc23)c(C#N)c1Cl	8.7	25.5984	350.889	7.05439	22	11	6	1	4	242.605	2316	10.8005	7.01891	6.84911	5.64197	3.90277	3.69103	4.07893	53.8605	36.8478	37.9167	37.9596	33.0745	37.0988	309.776	284.429	262.857	261.188	256.616	157.307	145.684	146.666	153.136	157.982	155.894	154.715	156.652	158.886	18.2939	-5.96169	5.5471	-3.42712	-15.5113	-6.25494	4.95207	-21.5657	7.44456	-3.30719
2493	Cc1c(C(N)=O)sc2ncn(C3CCCCC3)c(=O)c12	12	15.7108	147.844	5.68931	9	6	3	2	0	182.115	1052	7.2012	1.3388	1.19497	4.92201	3.8545	2.3476	2.10814	28.4324	27.5897	20.6316	18.3838	14.4098	12.3962	222.085	191.089	161.234	171.871	159.895	162.991	147.067	153.611	157.913	160.481	167.391	161.214	158.295	159.773	56.8143	66.4888	51.5006	12.6667	-122.066	-63.5926	-80.6578	-1.23935	11.4631	5.89993
3430	N=C(N)c1ccc(-c2ccc(-c3cccs3)s2)nc1	9	14.9467	114.622	5.3835	16	5	3	0	0	110.507	1174	7.2963	4.36458	3.50505	3.68356	2.28696	2.81134	3.00299	39.1333	34.0312	28.6667	26.2909	29.0312	20.0303	273.155	237.729	194.144	197.139	238.308	155.253	143.359	142.885	150.141	153.26	155.619	153.895	151.225	153.012	7.70025	-12.118	-21.6281	-18.8469	10.9215	-1.6079	-11.4405	-10.1348	6.20889	-3.93222
664	Fc1cc(-c2cc(-c3nnc(COc4ccccc4Cl)o3)c3ccccc3n2)c(Cl)cc1Cl	22	26.3174	662.241	7.68955	27	9	3	2	4	213.516	2100	10.7134	6.84938	6.65854	4.64165	3.53037	3.4701	3.83772	45.6522	34.22	31.5657	30.9271	30.3889	28.6098	291.743	258.246	247.976	250.711	242.844	157.818	142.943	147.18	154.744	156.12	156.346	156.447	158.014	160.345	41.3833	3.64713	-33.2338	-16.0021	39.5894	-24.1969	-61.4195	-41.0042	5.65595	-3.66352
4470	Cc1ccc(/C=N/NC(=S)Nc2ccc(C(=O)NCC(=O)O)cc2)cc1	0	19.5984	293.489	6.63735	12	8	4	3	0	243.125	1310	8.37374	4.28283	4.44444	5.52556	3.34427	3.49864	3.40909	29.7727	27.3333	20.1111	17.5699	20.4848	22.3684	236.409	200.088	179.293	192.76	186.363	161.806	149.342	152.887	156.76	162.708	163.159	159.823	162.836	160.706	31.8749	-23.267	-63.8007	-15.166	56.2371	10.3508	-31.8384	-21.0608	3.7686	-9.33884
577	CC1=NN(c2ccc([N+](=O)[O-])cc2[N+](=O)[O-])C(=O)C1	22	14.5963	101.494	5.26186	6	9	4	5	0	333.694	884	14.8148	5.35294	6.66667	12.3591	11.7494	5.3415	8.96528	32.7407	32.25	26.1296	24.2586	17.6471	18.6667	242.187	225.762	212.433	189.198	144.669	167.389	155.025	155.888	163.77	167.92	166.238	165.668	171.193	175.966	49.594	49.5075	-36.3704	-32.9945	-58.3032	57.5775	27.8985	-4.33745	4.93827	-0.395062
3136	O=C(Nc1ccc(S(=O)(=O)Nc2ccccc2)cc1)c1cn(CCO)c2c(cc(O)c3ncccc32)c1=O	10	29.9594	2807.65	9.2751	26	11	4	6	0	406.661	1830	9.77407	4.99767	4.96533	6.77768	4.19311	4.5581	4.39884	30.5	32.2812	24.1915	23.3133	19.1329	18.128	249.786	227.892	212.263	198.242	183.022	159.277	145.165	149.511	154.712	157.672	155.475	157.938	160.594	161.573	10.1931	35.1778	36.2785	11.3778	-86.6128	-104.326	-75.4953	25.958	11.7511	2.21667
742	COc1ccc(F)cc1-c1cccc(-c2nn(CCCN)c(=O)o2)c1	21	19.1489	206.808	6.24808	17	7	3	3	1	242.694	1086	9.39535	4.59756	5.07463	5.64406	3.95802	3.57961	3.72056	25.2558	26.6	19.7717	19	16.6098	17.8358	226.488	203.037	196.309	184.635	168.46	165.22	148.95	156.247	159.5	161.102	160.31	161.636	165.253	163.114	67.2785	69.4797	22.7193	-59.3743	-51.967	-81.8383	-39.9757	19.6679	10.7934	5.71769
2983	Cc1ccc(C(=O)Nc2ccc3c(C)cc(=O)[nH]c3c2)cc1	10	17.2868	204.709	6.11005	16	4	2	2	0	188.722	890	8.05263	4.49057	4.42308	4.96637	3.37067	3.52935	3.67521	23.4211	25.25	19.4578	15.7283	17.0755	16.6346	237.896	219.759	162.553	180.37	195.214	158.799	144.565	148.761	151.499	158.213	163.667	158.984	158.984	157.748	48.374	14.1828	-48.5069	-13.7978	-21.9335	19.9058	-47.7479	24.1967	8.35734	-4.41828
2034	Brc1ccc(-c2cn3nc(Cc4noc5ccccc45)sc3n2)cc1	14	20.4537	208.341	6.25547	23	7	4	1	1	116.276	2400	9.70866	6.69767	5.85052	3.22989	2.72754	2.91459	2.80719	66.6667	37.125	29.7895	26.1268	36.9767	41.8108	290.418	244.093	225.902	237.054	257.191	155.381	143.766	146.614	152.983	156.664	159.316	157.824	154.758	151.46	37.0332	-5.37131	-27.2058	-57.4537	-6.13684	39.2825	-4.48839	-31.3929	4.52778	-2.88194
4035	COc1cc(C2CC(c3cc4ccccc4o3)=NN2C(=O)Nc2ccc(O)c(O)c2)ccc1O	5	27.0245	423.584	7.27253	21	9	3	6	0	304.333	1452	9.78182	6.35385	5.53731	5.53333	4.00161	3.85577	3.56571	26.4	27.7966	22.1463	19.5152	20.3538	18.9179	241.254	218.635	186.164	208.915	204.158	159.992	146.705	149.965	155.966	158.867	162.014	159.389	159.3	157.316	50.6198	6.96694	-65.7355	-76.4545	-17.0496	37	34.8264	10.9917	13.1871	-5.38215
3143	Cc1[nH]c2ccc(OC(F)(F)F)cc2c1CNC(=O)CCc1cn(C)c2ccc(Cl)cc12	10	25.4204	286.482	6.82083	18	9	3	2	4	364.651	1656	9.99255	4.90758	4.12778	6.88021	3.32685	3.95417	4.32062	31.2453	28.3214	20.8898	18.1985	19.4393	18.95	237.575	219.364	167.544	162.028	174.855	167.603	148.348	158.967	154.54	158.716	165.134	166.214	166.649	172.233	79.0413	105.272	-105.229	-72.2985	57.617	116.241	3.39718	-103.758	8.46671	1.92061
3662	COc1ccccc1-n1c(S)nnc1-c1csc(N)n1	8	15.5729	124.286	5.51573	16	8	5	1	0	112.892	1264	9.28236	2.01212	1.5619	3.64166	2.94431	2.51756	2.62046	40.7742	34.3939	29.5091	29.05	19.6909	16.8	259.698	248.057	228.749	201.058	164.053	161.675	150.081	154.716	156.731	156.493	157.864	160.379	163.394	163.1	49.0853	24.7757	-6.0926	-39.668	-32.983	-56.743	-69.4721	-3.0846	10.9084	5.95525
2448	CSc1ccc(Cc2nn(CN3CCN(C)CC3)c(=S)n2/N=C/c2ccc(C)cc2)cc1	12	24.9556	449.241	7.27071	17	8	6	0	0	144.267	1700	5.72401	3.41406	2.69586	2.32689	2.45041	2.35084	2.17338	27.4194	26.4308	19.4397	14.3293	21.3359	18.3431	221.78	196.43	159.707	210.589	201.316	162.463	147.882	158.812	156.936	163.138	168.769	159.104	158.765	158.629	85.0783	5.48341	-33.6652	61.8758	61.619	-36.7744	-67.0199	-66.4553	13.7076	-6.20812
2663	O=Nc1c(-c2ccc([N+](=O)[O-])cc2)nc2sc(Cc3noc4ccccc34)nn12	11	23.2702	335.611	6.88066	23	11	6	4	0	286.698	1464	13.2934	10.6541	12.3623	7.35123	3.94019	4.90089	5.71873	37.5385	35.3721	28.3415	27.3133	31.2075	32.6739	278.368	249.366	232.209	241.303	247.547	160.206	148.502	148.707	155.791	160.55	161.331	160.684	161.31	159.851	44.5872	22.6176	5.89773	-96.0053	-68.4136	4.95887	15.8757	37.0062	6.13872	-1.38264
2114	CSc1sc(-c2nnc(S)n2-c2ccc([N+](=O)[O-])cc2)c2c1C(=O)CCC2	14	21.2868	283.026	6.63879	16	10	4	3	0	254.923	1782	9.90726	4.51228	4.28258	6.21763	3.12658	2.98899	3.71491	43.4634	35.7955	30.6222	31.5938	25.4831	25.284	269.457	250.097	236.292	230.289	204.851	157.748	144.524	147.877	152.229	152.045	152.833	154.781	158.727	156.875	74.0035	91.4298	-25.786	-95.8986	-96.6023	-45.3317	23.5298	21.8933	12.6264	7.96371
1804	COc1c(C(=O)O)c(O)c(NS(=O)(=O)c2ccc(C)cc2)c2occc12	15	20.2097	250.166	6.47764	15	9	1	7	0	321.855	1380	10.8889	6.25514	4.53968	7.85012	5.07492	6.28635	3.77293	33.6585	35.186	28.9167	28.4747	20.4074	18.8095	244.411	246.745	198.853	191.026	178.399	159.658	144.666	150.734	150.047	156.949	159.803	159.809	165.189	154.737	21.9186	65.621	22.9078	38.1038	-19.6172	-93.7443	-12.5162	-26.5996	13.4366	5.4533
4177	O=C(c1cccnc1Nc1nc2c(Cl)cccc2s1)N1CCNC(Cl)C1Cl	3	21.3677	188.008	6.22974	15	10	5	1	3	154.853	2058	8.22584	4.50136	3.67518	3.77689	2.92127	2.66356	2.51889	50.1951	35.5	32.1875	31.6154	27.2439	29.2568	272.6	229.534	226.288	231.066	214.175	160.922	147.864	155.153	159.662	160.919	159.645	159.565	160.859	158.628	31.3786	8.15903	23.4874	-15.9066	-31.942	-44.4949	-3.87534	-15.5363	5.4069	-0.778703
3656	S=C(Nc1ccccc1)Nc1nc(-c2nnc(S)n2-c2ccc(Cl)cc2)cs1	8	22.0867	697.705	7.57742	22	10	6	0	1	124.188	2012	8.58055	4.61861	4.8826	3.02898	2.68158	2.52794	2.62307	49.0732	36.1591	29.012	32.6463	35.6	32.0943	287.356	239.69	247.528	240.302	234.538	157.166	146.969	149.197	156.483	157.571	155.101	156.117	156.648	155.147	35.3024	-3.6007	-5.04252	-6.07588	-24.8877	-21.0852	-1.09614	-18.4443	4.98989	-1.79833
3957	C/C(=N\N(C)S(=O)(=O)c1ccccc1)c1ccccc1O	5	15.9983	130.883	5.61624	12	6	2	3	0	218.216	1102	7.95796	3.89706	2.67188	5.89773	3.01949	4.32775	3.10923	29.7838	32.8158	24.1974	20.622	17.1471	12.7188	231.964	214.172	176.837	152.454	174.708	160.723	144.696	153.009	155.761	161.181	160.841	164.731	157.645	160.368	10.9653	42.0415	0.0926873	-106.053	-42.2655	-23.7742	29.0943	0.188215	9.54858	-3.90723
4402	CC(C)(C)n1ncc2c(NCCc3c(F)cccc3Cl)ncnc21	0	18.8165	481.11	7.05157	15	7	5	0	2	176.79	1246	7.75825	3.91892	5.11296	4.1114	2.45456	2.84969	2.97293	28.9767	26.7111	21.0303	17.1864	17.1351	22.1	225.301	200.791	167.197	155.271	165.598	167.369	150.119	158.825	162.009	170.484	164.25	165.201	173.87	158.106	80.4844	58.1296	-10.7219	-66.8408	-156.497	-24.2307	-15.8521	72.4278	12.0806	-2.25257
1949	Cc1cc(=O)oc2cc(OCCCCCCn3cc(CN4CCOCC4)nn3)ccc12	14.5	24.1795	11419.6	10.4745	15	8	4	4	0	207.167	1310	7.04918	2.28037	2	3.39617	2.52733	2.38318	2.20079	21.4754	24.2188	14.8188	13.109	13.3645	12.5714	205.118	167.717	142.665	143.639	153.462	164.763	148.134	158.33	161.796	162.994	165.327	168.231	166.092	159.919	92.2064	24.2593	-18.8146	2.04407	-61.6603	-78.351	-124.507	-46.3827	8.57915	-0.568127
4475	COc1ccc(C(=O)/C=C/c2ccc(Cl)c(Cl)c2)cc1	0	15.0965	101.002	5.30829	12	4	0	2	2	133.538	1294	7.85031	4.64565	3.23611	4.17307	3.31915	3.46775	2.9678	40.4375	30.1818	28.619	19.9355	27.1622	23.95	268.437	239.568	178.374	197.17	240.365	154.842	139.947	146.151	149.688	153.546	157.557	157.242	149.643	153.644	25.0232	-25.2297	-45.4862	-34.6359	41.9835	31.1797	-35.661	-40.9317	4.91016	-6.48438
2873	Clc1cc(Cl)c(Cl)c(/C=N/Nc2nc(-c3ccc(-c4ccccc4)cc3)cs2)c1	10	22.7938	249.18	6.58289	23	7	3	0	3	121.103	2076	7.65719	4.99383	5.1138	2.81634	2.39306	2.5607	2.645	48.2791	34.6087	30.5778	28.8182	31.1	39.2545	292.818	250.669	212.105	209.203	238.358	154.043	141.629	143.954	150.697	154.226	156.579	156.123	156.216	151.383	19.8646	-31.4044	-28.1673	-23.5499	15.9598	19.7996	11.5885	-16.8327	4.45268	-7.46133
366	O=C1S/C(=C\c2ccc(S(=O)(=O)Nc3nc(-c4ccccc4)cs3)cc2)C(=O)N1C(=O)c1ccc([N+](=O)[O-])cc1	24	31.6328	843.318	8.12364	23	14	4	7	0	487.529	2364	11.7738	7.82573	7.26217	8.70587	4.40105	5.56709	4.53485	42.2143	39.3167	30.3967	29.9528	30.5263	32.2921	281.913	248.871	235.855	244.497	238.745	155.722	142.584	145.727	150.153	157.026	154.787	152.816	154.532	152.191	8.46939	35.7415	21.9887	-51.7279	-15.4558	-54.3401	-17.8481	-42.449	4.65306	-7.61224
3342	COc1ccc(-c2cn3nc(-c4ccc(NC5CCCCC5)c([N+](=O)[O-])c4)sc3n2)cc1	9	25.4724	525.884	7.42823	20	9	5	3	0	250.948	1544	8.33535	5.07443	4.76628	4.56269	3.22771	3.48382	3.77618	28.0727	28.4746	19.5373	17.8978	19.8641	21.0345	234.879	196.381	185.965	194.951	187.108	161.623	147.21	152.021	158.128	161.362	161.488	160.636	161.713	161.477	76.2498	63.2765	69.1312	72.1887	39.3164	-27.5788	-33.168	-73.7914	10.7521	2.47934
2083	COc1ccc2nc(C)cc(-n3cc(CN4CCOCC4)nn3)c2c1	14	19.7871	308.629	6.64843	15	7	5	2	0	136.417	1042	7.82609	3.30233	2.77941	2.96558	2.85166	2.57752	2.42034	22.6522	25.6327	18.2549	15.9292	14.7093	15.4706	215.77	198.558	172.32	170.777	156.832	165.058	149.711	160.13	160.499	161.29	163.933	166.063	169.136	158.373	76.9792	-4.95841	-40.6635	39.0718	14.3535	-72.7883	-84.2193	-90.138	11.5799	2.90548
4280	OC1COc2ccccc2/C=N\n2c(nnc2-c2cccnc2)SCCCCSc2nnc(-c3cccnc3)n2/N=C\c2ccccc2OC1	0	39.3838	706.561	8.16985	34	15	10	3	0	288.396	2486	8.57182	4.57687	4.00127	3.51702	2.96238	2.96485	2.63943	30.3171	30.0682	23.3859	21.8848	22.6857	20.4046	245.044	208.37	214.512	220.098	206.895	161.446	147.483	152.825	157.713	162.548	161.337	157.626	158.93	157.9	97.7711	58.0993	84.312	-33.8065	-116.791	-165.837	-186.671	-171.515	13.6984	2.18679
4196	Cc1ccc2nc(NC3OCCc4ccccc43)sc2c1	2.5	16.9586	125.951	5.57783	15	4	2	1	0	98.8645	1046	6.87688	4.07843	3.02083	2.67201	2.29226	2.45098	2.34221	28.2703	28.225	20.2	18.4545	19.3529	16.1042	243.16	209.708	170.567	187.054	211.326	157.553	142.946	149.515	152.517	157.684	160.689	159.71	155.027	148.89	33.5999	-9.34413	-25.1588	-20.8653	20.5969	-10.1082	-23.3968	-47.2399	7.46238	0.499635
1931	CC1=NN(c2cccc(Cl)c2)C(=O)C1/N=N/c1[nH]nc2nc3cc4ccccc4cc3cc12	15	26.8747	408.776	7.20709	23	9	7	1	1	202.394	1576	9.95112	6.19858	6.03567	4.13049	3.44812	3.42514	3.28898	32.1633	30.2963	24.9818	22.2636	21.9681	21.0988	267.047	238.316	223.159	224.553	201.469	159.878	147.103	150.34	157.682	161.464	158.916	159.134	164.494	164.361	60.5742	24.8671	-0.879227	-26.7875	-46.3502	-29.7547	-5.64133	-12.6491	10.0137	-3.23698
3087	O=c1cc(OCc2nc(-c3ccc(F)cc3)n[nH]2)c2ccccc2o1	10	19.8964	216.664	6.29464	21	7	3	3	1	234.222	1080	11.7838	7.32759	7.17021	6.33033	4.07292	4.0273	4.01891	29.1892	29.9	23.039	21.7297	20.8276	21.5106	258.175	223.658	206.395	191.596	185.847	162.025	146.657	151.357	158.55	161.545	159.326	163.317	166.414	164.677	34.6976	-5.99196	-55.4375	-45.5676	-44.3287	-3.10007	75.6939	-14.2783	3.67348	-2.85756
3991	Cc1c(/N=C/c2ccccc2)c(=O)n(-c2ccccc2)n1C	5	17.0561	299.184	6.48952	17	4	3	1	0	148.889	876	7.48718	2.76923	2.17391	3.81766	2.99269	2.7265	2.42512	22.4615	25.0488	19.9012	16.8736	13.5769	11.7681	233.284	210.996	179.07	190.119	164.761	160.13	145.813	153.721	157.746	159.481	162.432	155.791	160.188	160.841	57.6206	31.9711	-3.40237	-66.0789	-73.3892	-36.4412	-37.3333	-12.7929	11.8889	1.77778
3541	CC1(C)CC(=O)C2=C(C1)Nc1c(ccc3ccccc13)C2c1cccc([N+](=O)[O-])c1	8	24.3237	290.185	6.76913	16	5	2	3	0	273.868	1212	8.11538	4.05769	3.54483	5.26669	2.94463	2.96029	3.8841	23.3077	25.4821	19.0935	15.6364	16.359	15.3724	238.607	224.495	208.165	202.648	187.135	158.017	142.922	145.762	148.9	158.687	155.128	152.739	155.29	157.224	65.429	36.0695	28.6672	59.1065	-141.933	-48.6997	1.07692	-35.2086	13.4822	-1.90089
199	COc1c(F)c(F)cc2c(=O)c(-c3nnc(Nc4cccc(C)c4)s3)cn(C3CC3)c12	27.1	24.8223	821.648	7.84271	21	9	4	2	2	304.753	1552	10.4172	4.43711	5.80702	6.21946	4.04537	3.6462	3.8711	31.6735	30.4906	26.4231	26.1304	20.2925	21.4737	249.669	238.496	221.056	202.295	175.773	164.251	146.777	153.663	158.006	157.771	160.907	162.139	168.606	169.043	76.9456	51.1361	101.41	27.5465	-41.4626	-97.6395	-91.458	-33.3832	14.4523	4.3182
4328	N#Cc1c(-c2ccc(Cl)cc2)cc(-c2cccs2)nc1O[C@@H]1O[C@H](CO)[C@H](O)[C@H](O)[C@H]1O	0	24.8628	261.039	6.72782	17	10	2	6	1	303.564	1838	9.25587	5.97151	4.85932	5.95224	4.07946	4.0252	3.91295	36.0392	31.1481	24.3065	22.4922	27.359	25.1855	250.857	211.972	204.793	223.808	235.861	159.09	144.395	148.273	156.755	159.48	159.093	157.21	153.788	153.591	9.38299	-11.4557	61.0511	18.9815	-10.7775	-44.4671	-98.88	-104.463	9.56747	-4.09343
868	O=C1NC(c2ccccc2)(c2ccccc2)C(=O)N1CNc1nc2ccccc2s1	20	23.9543	636.357	7.55437	21	7	4	2	0	221.177	1426	8.59259	4.06433	4.18681	4.60786	3.62018	2.98224	2.80912	29.7083	29.4615	22.7699	22.084	16.3772	18.7033	256.317	225.61	209.703	197.029	171.532	157.666	144.632	149.187	153.206	157.466	158.042	157.822	161.512	160.141	32.6049	14.8765	27.1728	-35.9012	-85.1852	-78.2222	37.4074	55.5679	11.7569	2.48264
2710	Cc1ccc2[nH]c(-c3ccccc3)c(-c3cc(-c4ccc(Cl)cc4)nc4ncnc(N)c34)c2c1	11	27.5414	410.759	7.24178	31	6	5	0	1	167.172	1562	8.06676	4.93546	3.49489	3.09578	2.97639	2.91316	2.82772	28.9259	27.9153	22.8934	20.8134	20.1856	17.5862	262.976	249.094	238.549	246.599	223.8	156.907	143.932	146.622	149.377	153.624	152.847	150.545	153.08	157.733	56.0611	33.5366	15.4366	30.2301	-2.82633	-46.9108	-118.206	-170.154	15.0604	4.73663
3310	O=C1c2ccc(O)cc2C(=O)c2c(O)cc(CO)cc21	10	15.7108	122.259	5.49929	12	5	0	5	0	263.25	870	11.3333	4.41026	2.07143	8.775	5.64667	5.62251	3.8631	29	28.6875	25.2794	23.0405	17.0513	11.3571	258.185	255.512	204.265	181.944	160.801	155.945	142.176	142.653	147.083	154.387	156.857	158.549	160.295	164.764	9.22222	1.66667	16.8889	10.8889	-45.4444	-65.1111	-30.6667	-22.8889	9.08	1.84
592	Cc1ccc(C2SC(CN3CCN(c4ccccn4)CC3)C(=O)N2c2ccc(Nc3nc(Oc4ccc5c(C)cc(=O)oc5c4)nc(N(C)C)n3)cc2)cc1	22	44.133	3065.69	9.73278	34	14	9	4	0	355.865	2470	8.02546	4.28415	4.22041	3.70692	2.97281	2.72418	2.70917	25.7292	27.2136	21.0837	18.3397	17.6885	18.0571	232.196	212.362	186.934	189.36	187.52	161.776	146.93	156.589	155.679	160.679	159.521	160.054	161.4	156.223	148.44	77.6753	-50.334	25.8575	-30.2073	-113.071	-73.8169	-19.5761	21.9912	-1.48242
2381	COc1ccc(Cc2nnc3n2NC(c2ccco2)S3)cc1OC	12.68	18.9301	270.399	6.47537	16	8	4	3	0	134.115	1236	9.11111	4.60648	4.27485	3.35286	2.72092	2.58458	2.77626	30.9	30.6279	25.3205	21.1647	18.2083	20.5439	237.32	220.906	178.168	179.321	167.419	162.401	149.073	156.375	156.418	158.508	162.789	163.015	164.666	163.635	60.1389	-12.2222	-69.7222	-61.75	-20.75	41.6111	85.3889	-21.75	11.9375	2.75
4132	COc1ccc(C2ONC3=C2C(c2ccccc2)N(Cc2ccccc2)C2CCCCC32)cc1	4	27.2132	538.699	7.51293	18	4	2	2	0	161.778	1338	5.93939	2.67729	1.99219	2.45118	2.19593	2.19555	2.09332	20.2727	23.6197	16.2135	15.0192	13.8406	11.3906	221.509	194.001	186.127	183.21	178.032	159.312	143.488	149.782	154.062	158.739	156.695	156.316	154.438	158.145	59.8889	-1.77778	5.44444	-3.22222	-24.5556	-69.3333	-65.7778	-60.5556	16.2222	5.55556
59	COc1ccc(/N=N/C(C(N)=O)c2ccccc2C#N)cc1	32	16.3609	176.865	5.96385	12	6	4	2	0	203.167	914	9.27778	4.26316	4.12963	5.64352	4.68056	3.7232	3.357	25.3889	26.6757	21.2676	19.6164	17.3158	15.9074	239.374	217.889	186.479	187.159	194.617	162.039	147.583	151.808	157.286	161.256	164.784	162.876	159.932	158.971	37.1883	-11.858	-36.3549	-14.534	18.5895	0.82716	-62.6019	-18.4444	7.77778	-2.55556
720	O=S(=O)(Cc1nnc(CS(=O)(=O)c2c[nH]nc2S(=O)(=O)c2ccc(Cl)cc2)o1)Nc1ccc(Cl)cc1	21	28.5242	1506.51	8.59848	22	17	5	7	2	427.409	2738	11.344	6.04938	8.0435	8.38057	4.28146	4.64688	6.30999	53.6863	48.8148	35.4087	36.287	33.9495	32.7907	275.346	234.027	221.012	221.782	213.215	160.697	145.082	150.29	157.755	160.645	162.227	159.782	163.619	162.638	-25.7397	44.2149	-111.469	75.572	37.6191	-4.2579	-120.41	70.5202	-0.906574	-7.34256
574	O=C1CSC(c2ccccn2)N1c1nnc2c3ccccc3nc-2s1	22	20.3324	212.645	6.27592	19	8	5	1	0	156.312	1444	9.96914	6.30818	5.84444	4.34201	3.57903	3.41777	3.27202	40.1111	35.725	31.3718	33.8243	25.4906	24.7111	282.451	249.977	244.135	235.711	230.166	156.831	144.09	148.085	155.251	156.471	157.662	156.486	157.962	152.866	37.2483	6.57202	-25.5844	9.0439	2.72977	-18.2044	-37.4294	-48.0123	6.61111	3.125
1100	Fc1ccc(/C(Cn2cncn2)=N\Nc2nc(-c3ccc(Br)cc3)cs2)cc1	18.17	22.0582	224.191	6.44212	22	9	6	0	2	191.498	2554	9.65504	5.60181	5.98584	4.55949	3.20691	3.28964	3.36658	60.8095	35.4	27.2381	24.4048	33.1519	26.8676	271.884	226.269	208.534	222.574	219.475	162.282	148.331	153.63	158.109	161.191	163.062	162.314	163.086	161.294	29.1539	-40.6499	-71.0649	-16.1994	47.67	-10.6139	-22.5609	8.58377	3.15646	-8.0907
3623	CCOC(=O)c1nc(N)sc1Sc1nc2cc(OC)c(OC)cc2c(=O)n1Cc1ccccc1	8	26.208	434.022	7.29687	21	11	4	5	0	270.646	1878	9.19444	5.38765	5.55641	4.83296	3.47837	3.38722	3.93224	33.5357	31.3559	28.3727	29.4667	24.5111	23.6	244.17	241.264	224.3	228.172	218.649	160.202	146.032	154.624	152.893	154.563	156.575	154.695	156.267	156.301	83.3611	51.9167	25.7778	-77.1111	5.63889	-13.8056	-79.0278	-62.7222	18.9592	13.3469
2616	COc1ccc(-[n+]2noc(O)c2Cn2c(-c3ccc(Cl)cc3Cl)nc3ccccc32)cc1	12	25.4605	386.955	7.12146	26	9	4	3	2	183.927	1811	9.24918	5.81232	4.71345	3.75362	3.25675	3.21809	3.32178	36.9592	31.2264	26.6476	25.8696	25.5378	24.6053	263.259	242.558	223.142	220.799	223.293	159.133	146.378	151.457	155.128	159.928	156.468	156.943	157.746	159.167	56.2126	18.997	-43.4727	-89.6377	37.4084	71.2653	-13.3563	-123.989	12.8084	1.39109
1578	COc1ccc(/C=N/N=c2\scc(-c3cc(O)ccc3O)n2-c2ccc(C)cc2)cc1	16	24.1676	903.512	7.93769	23	7	3	3	0	212.67	1480	8.16239	5.10667	3.97819	4.08981	3.22664	3.34648	3.05648	28.4615	28.4545	22.8113	20.8305	22.07	17.7664	246.02	229.771	202.412	219.912	219.515	158.149	144.462	148.766	151.953	156.687	158.53	156.69	153.717	156.341	54.1438	-4.85914	-48.7104	12.523	53.336	-34.8964	-27.8442	-70.4331	13.7112	-0.89534
1945	O=[N+]([O-])c1ccc(-c2nn(-c3ccc([N+](=O)[O-])cc3)cc2-c2nnc(-c3ccccc3)o2)cc1	14.6	27.0245	412.892	7.24696	28	11	6	5	0	369.806	1456	12.6667	8.88043	7.75248	7.70428	3.73611	4.50664	4.0275	30.3333	31.2308	24.0882	23.1204	25.9239	22.8911	264.956	236.437	223.783	250.313	247.309	160.413	148.586	148.629	154.723	162.472	161.192	155.753	156.239	157.686	46.4375	44.1562	9.84375	-92.8125	-87.8594	-45.1875	-52.6875	-32.4219	6.0625	-4.96875
3154	Cc1ccc(Nc2nc(Nc3ccc(C)cc3)nc(Nc3ccc(C#N)nc3)n2)cc1	10	24.2604	277.155	6.75598	24	8	8	0	0	194	1240	8.5098	6.04167	5.01923	3.80392	3.46988	3.33681	3.10577	24.3137	26.6111	19.8302	16.693	21.1042	18.4135	241.354	210.883	187	232.049	213.198	162.834	149.259	154.9	158.398	164.151	170.164	161.779	163.215	164.349	64.8212	30.3849	-18.7482	77.0496	26.316	-41.2403	-63.8385	-83.2564	7.52018	-6.34295
3733	O=C1NC(=S)/C(=C/c2ccc(Cl)cc2Cl)S1	7	12.3775	72.911	4.75924	6	6	1	1	2	98.6389	1568	8.86185	4.15595	3.41564	4.69709	3.16982	3.89007	4.07608	74.6667	44.5	42.25	44.0303	46.1053	62.7778	335.799	282.809	281.003	293.468	228.258	149.533	139.725	140.901	145.125	149.807	148.716	147.56	158.249	168.39	0.846589	-30.5523	0.090479	-2.23247	12.9802	-0.128664	-8.44332	-6.6188	-0.265306	-4.16327
1824	COc1cc(/C=N/N=c2\scc(C3=CC(=O)C=CC3=O)n2-c2ccc(Cl)cc2)ccc1O	15	24.9437	778.49	7.82051	17	9	3	4	1	266.259	1792	9.95936	5.96256	5.65882	5.54706	3.54516	3.70607	3.58931	37.3333	32.2941	27.2551	25.7353	27.5269	25.1176	269.468	245.888	226.569	229	225.431	156.791	143.535	147.679	152.734	155.72	156.621	154.954	157.912	154.23	42.5936	-14.6372	-44.3244	-43.1502	0.959191	14.8481	17.1759	-54.905	9.88021	-1.81944
3927	Cc1ccc(C2NC3CCCCC3C3C2C(c2ccccc2)C(c2ccccc2)N2C(=S)NNC32)cc1	6	30.0986	501.541	7.52602	18	5	4	0	0	157.541	1640	5.04718	2.18571	1.57246	2.1581	2.11404	2.06847	1.92869	22.4658	23.8228	16.1211	15.2068	14.3771	11.6646	222.488	191.185	186.851	188.573	170.303	159.818	144.69	149.453	154.618	157.639	157.915	156.22	157.977	158.97	51.3104	-6.57689	-6.78852	39.3521	36.8325	-76.6446	-139.138	-91.0037	17.4978	5.84781
2940	COc1ccc(-[n+]2noc(O)c2CNc2nc3cc([N+](=O)[O-])ccc3s2)cc1	10	22.0463	220.429	6.42519	20	11	5	5	0	274.198	1447	11.3439	6.92647	6.16129	6.52852	3.48649	3.55746	3.85349	34.4524	33.0222	26.4524	22.413	23.3824	24.8871	250.721	231.779	192.774	197.67	199.041	162.741	150.95	153.898	157.518	162.291	162.548	161.433	163.2	160.947	45.1988	16.3794	-42.0317	-102.235	7.92164	44.4956	74.9786	-55.9111	9.15646	-1.48299
3898	Cc1ccc2sc(Nc3ncccc3C(=O)N3CCN(CCO)CC3)nc2c1	6	21.9773	318.26	6.79249	15	8	5	2	0	201.615	1372	7.2244	4.07744	3.66308	3.95323	2.76423	2.74111	3.03833	26.902	27.2778	19.1833	17.2692	17.8283	18.3011	224.145	193.835	167.07	179.841	184.198	163.204	148.226	157.737	159.638	161.326	165.252	162.889	162.706	157.825	53.452	3.00671	11.5421	25.1345	-9.4013	-22.9086	-19.9858	-31.2667	11	0.777778
3508	Cc1ccc(-c2cc(C)nn2-c2cc3nc(C)cc(-c4ccc(C)cc4)n3n2)cc1	8	24.2365	301.93	6.80881	26	5	5	0	0	145.778	1168	7.32075	3.64754	2.93103	2.75052	2.76019	2.51275	2.44923	22.0377	25.193	20.0442	17.3721	15.9262	14.9483	236.215	224.747	202.588	203.468	186.177	159.984	145.555	152.056	155.156	158.022	158.782	157.714	161.7	161.2	105.381	70.5468	-22.979	40.6782	-10.3126	-83.3542	-76.9466	-140.66	17.7166	4.82164
267	COc1ccc(N2CCN(c3nc(Nc4ccc(C#N)c(C(F)(F)F)c4)nc(Oc4ccnc5ccccc45)n3)CC2)cc1	26	34.8612	493.266	7.68265	28	13	8	2	3	431.118	1904	10.8986	7.59859	7.05405	6.24809	3.26723	3.98396	3.49634	27.5942	28.6351	22.0255	20.614	23.0493	22.6689	243.718	220.905	183.099	187.085	212.683	167.03	149.008	160.355	158.909	162.789	167.84	167.424	168.015	158.33	92.5184	92.8181	-17.4302	-12.6396	69.4476	-43.5062	-60.2607	-23.0792	10.5406	-0.270321
3802	Cc1cc(C)n2nc(-n3nc(C)cc3C)cc2n1	7	14.4179	95.0124	5.14179	14	5	5	0	0	94.6667	728	7.63636	2	0.380952	2.86869	2.12882	2.63686	2.28571	22.0606	25.2571	20.746	16.2877	15.7805	10.4286	217.835	213.403	174.519	129.185	192.039	166.009	151.329	160.192	165.845	163.26	160.276	174.069	164.101	155.721	92.7567	69.9118	-67.0138	-66.7759	-54.2259	5.13499	-118.973	-98.7769	13.5556	5.33333
1523	Nc1nc(COC(=O)Cc2cccc(C(F)(F)F)c2)cs1	16	16.1903	186.382	5.96974	11	8	2	2	3	329.621	1204	12.5764	9.61667	4.88235	10.3007	4.95269	8.97851	3.71596	37.625	32.9697	23.2295	20.7576	27.2	23.9412	246.718	211.999	185.454	179.317	195.85	171.681	149.727	160.594	159.068	167.718	169.673	175.907	167.895	160.054	30.2157	43.0095	-41.5985	-26.8047	-18.9071	-91.1311	93.184	-30.7839	0.0166016	-4.69727
3435	N=C(N)c1ccc(-c2ccc(-c3cccs3)o2)cc1	9	14.9467	114.622	5.3835	16	4	2	1	0	118.337	970	7.69176	4.85294	3.21296	3.81731	2.20733	3.3317	3.07373	31.2903	29.9091	21.8033	20.6167	24.2941	18	258.889	220.279	179.103	181.434	229.599	156.006	143.644	143.122	151.569	153.936	157.896	155.834	150.284	155.124	18.8284	4.71789	-43.6382	-36.47	-12.5524	23.5375	4.91467	-34.325	6.45578	-4.31322
4413	COc1ccc(C2CC(c3ccc(C)cc3)=Cc3[nH]nc(O)c32)cc1OC	0	21.1893	260.805	6.55703	17	5	2	3	0	170.778	1104	7.55102	4.38136	3.3	3.48526	2.65895	2.87924	2.8654	22.5306	25	20.0654	16.5077	16.0932	14.6636	227.286	228.089	173.573	180.03	174.014	159.929	145	150.974	148.801	153.776	158.997	158.239	159.747	160.87	66.2445	8.50479	-45.7768	-65.2561	-25.7813	27.6764	76.4802	-3.36901	16.9117	2.38276
806	C[C@H]1CC=C2C1C[C@H](C(C)(C)O)C[C@H](O)[C@@H]2C	20	13.3095	77.5298	4.88129	0	2	0	2	0	137.979	694	3.53488	0	0	3.20882	2.26605	1.98571	1	16.1395	18.9091	12.6794	9.37059	4.0381	1	176.598	164.932	111.852	104.624	74.3489	164.667	145.016	152.013	155.651	161.609	166.056	166.905	170.716	184.918	33.4002	-6.53488	-61.4321	-11.9632	15.6452	-79.2731	-16.768	75.5306	11.3348	-6.48837
920	N#CC1=C(N)OC2=C(CNc3c2cccc3[N+](=O)[O-])C1c1ccc(Br)cc1	20	21.2868	225.473	6.41145	12	8	4	3	1	263.689	2310	10.5767	4.51811	4.9046	6.59223	4.12863	3.21639	4.18766	57.75	33.2326	27.8542	24.2477	24.5333	35	269.419	250.868	214.842	193.424	186.615	158.848	146.835	146.464	150.134	156.475	155.954	161.338	163.382	162.52	32.6937	25.5485	4.36064	-40.3331	-80.4907	-60.6897	39.0491	30.7175	9.76688	1.19938
2743	COc1ccc(Br)c(-c2nnc3sc(-c4ccc([N+](=O)[O-])cc4)nn23)c1	11	20.5916	276.464	6.57759	20	10	5	3	1	224.804	2504	11.9309	6.66742	7.16414	6.24455	3.46423	3.80417	3.76347	69.5556	39.0769	37.8286	35.0822	36.6122	32.9773	284.807	270.12	231.968	257.505	247.814	159.37	148.196	150.894	152.164	157.467	161.802	158.083	160.744	156.466	43.1705	11.0304	-11.1569	-24.7328	-17.5178	-25.2299	-73.3844	-36.1268	7.92593	0.654321
4037	O=c1c2cc(Br)ccc2nc(Cc2ccccc2Nc2c(Cl)cccc2Cl)n1-c1ccc(/N=C/c2ccc(O)cc2)cc1	5	34.1646	1517.09	8.78317	34	9	4	2	3	258.144	3374	8.36783	4.88743	4.52357	3.91128	2.95965	2.85575	2.7866	51.1212	31.7324	27.0395	25.5063	23.6404	23.0852	276.241	239.92	229.01	243.4	224.405	155.392	142.452	145.462	153.381	156.466	155.17	151.037	152.122	155.026	43.5168	-12.5141	-39.1112	-19.1739	-18.9052	-62.9217	8.74725	13.1907	9.90611	-8.04683
3352	Cc1ccc(-c2cc(-c3c(-c4ccccc4)[nH]c4ccc(Cl)cc34)c3c(N)ncnc3n2)cc1	9	27.5414	410.759	7.24178	31	6	5	0	1	167.172	1562	8.06676	5.10559	3.66532	3.09578	3.00798	2.97385	2.82209	28.9259	27.9153	22.8934	21.2239	22.0559	20.1515	262.976	249.094	237.23	253.167	229.623	156.907	143.932	146.622	149.377	153.594	153.85	149.755	153.674	158.834	56.0611	33.5366	15.2144	35.8845	22.5381	-22.8048	-127.887	-147.961	15.0604	4.73663
3528	Nn1c(SCC(=O)c2ccnc(Cl)c2)nc2sc3c(c2c1=O)CCCC3	8	20.6606	752.762	7.57926	15	9	4	2	1	201.901	1752	8.49985	5.07168	5.0463	4.92442	3.5097	3.91232	3.09208	42.7317	34.4318	28.4896	29.1064	25.7742	24.3	262.673	229.896	202.947	199.285	211.598	159.218	145.462	149.993	153.46	155.613	160.123	162.107	159.626	157.998	51.9536	39.3286	9.91013	-42.887	-53.9073	-75.1499	-30.5625	58.2805	9.09578	3.32064
4417	CC(=O)c1ccc(N/N=C(\C(=O)c2ccc(Cl)cc2)c2nc(C)cc(=O)[nH]2)cc1	0	22.4149	273.803	6.67712	18	8	4	3	1	268.089	1450	9.42619	5.38947	4.25599	5.82801	4.36106	3.92049	3.25097	31.5217	28.5625	23.5579	21.5729	22	19.951	251.058	224.591	201.106	220.602	219.353	160.343	146.401	150.986	157.348	160.409	163.209	160.801	159.867	155.777	59.9669	17.4514	-41.3031	11.9037	-20.7719	-20.3492	-134.398	-57.4856	8.11626	-5.1328
3560	Cc1ccc2sc(Nc3ncccc3C(=O)N3CCNC(Cl)C3Cl)nc2c1	8	21.4081	178.74	6.17918	15	9	5	1	2	160.042	1808	7.67396	4.29542	3.36481	3.63731	2.822	2.6741	2.49438	41.0909	32.2128	28.1961	24.5146	24.4941	24.5375	254.305	220.164	214.562	221.055	207.12	161.618	147.791	155.706	158.451	161.253	161.225	158.449	161.664	158.92	45.9109	14.263	15.0767	0.294995	-39.5073	-45.1191	-17.4383	-15.613	7.9375	-0.6875
4001	Cn1c(=O)cc(Oc2nc(Nc3ccc(C#N)cc3)nc(NC3CCCCC3)n2)c2ccccc21	5	27.6342	857.103	8.00632	22	9	7	2	0	250.028	1432	8.33333	6.03448	5.36	4.16713	3.62069	3.38985	3.36667	23.8667	26.1875	18.0403	17.3133	21.5259	20.112	232.075	191.895	183.579	206.764	212.606	162.82	147.778	154.848	159.66	163.809	166.394	163.957	163.472	162.394	91.74	109.5	88.99	82.3	-8.87	-68.74	-147.14	-133.25	9.98778	0.713889
1825	COc1ccc(/C=N/N=c2\scc(C3=CC(=O)C=CC3=O)n2-c2ccc(C)cc2)cc1	15	24.1676	903.512	7.93769	17	7	3	3	0	236.67	1478	8.92889	5.78986	4.48148	4.7334	3.4055	3.67029	3.29	29.56	29.2264	23.4706	22.0455	23.4565	18.798	254.618	234.283	211.487	230.517	230.513	157.078	142.925	148.664	151.907	156.08	157.635	155.629	152.727	155.059	62.061	-4.08711	-50.3579	11.5751	68.6796	-17.6997	-23.7063	-62.9211	11.8428	-0.474
2084	Cc1ccc2sc(-n3c(/C=C/c4ccccc4)nc4sc5c(c4c3=O)CCCC5)nc2c1	14	26.0582	631.334	7.61099	24	6	3	1	0	176.396	1680	7.45073	5.39623	3.86835	3.32822	3.1431	3.10249	2.6834	31.6981	30.2069	23.3622	24.0859	26.7736	22.9328	260.454	226.341	224.09	250.9	257.786	154.977	140.535	146.215	151.251	154.161	156.846	152.637	149.716	148.549	66.2188	57.8062	86.1815	56.7938	-22.4335	-96.0866	-121.61	-118.994	13.5739	8.96796
1553	COc1ccc(Br)c(-c2nnc3sc(-c4ccc(C)cc4O)nn23)c1	16	19.8845	215.693	6.29015	20	8	4	2	1	150.804	2430	9.51346	5.24598	4.44753	3.96852	3.24505	3.21937	3.00495	63.9474	35.9512	35.4459	32.6173	29.9245	28.4583	271.318	263.389	217.187	238.023	232.965	158.479	146.139	150.867	150.017	156.652	162.08	158.979	160.015	156.271	55.8134	20.0898	-1.03354	26.9482	14.5589	-2.31671	-74.6003	-105.337	12.4965	3.63435
553	Cc1c(Nc2csc(N)c2C#N)c(=O)n(-c2ccccc2)n1C	22.8	17.7917	176.708	6.00741	16	7	5	1	0	188.365	1156	8.43275	3.21399	2.21212	4.95696	3.18298	3.42509	2.81117	30.4211	29.65	24.8701	20.4778	16.358	14.6212	244.007	230.4	186.483	193.89	165.22	161.88	149.647	153.895	157.798	159.312	163.006	157.631	160.728	163.645	57.5623	44.7054	-19.9557	-86.1163	-64.6384	-26.9027	23.8824	-30.6771	15.0623	2.47299
3914	Clc1ccc(-c2nn(-c3ccccc3)cc2C2CC(c3ccc(-c4ccccc4)cc3)=NN2c2ccccc2)cc1	6	33.0199	777.611	8.06721	35	5	4	0	1	182.616	1808	7.20007	4.61823	4.07515	2.68554	2.43656	2.54108	2.51787	26.5882	26.7838	19.5679	19.0602	19.1949	18.0145	258.281	220.014	212.636	217.347	217.811	155.448	141.932	145.322	153.362	155.407	156.03	152.605	152.895	154.092	56.71	-7.53244	-32.9575	-32.9868	-0.643769	8.22167	-29.9212	-77.2804	12.2478	-3.31358
4099	COc1ccc(C2CC(=NOC(=O)c3ccccc3O)CC(c3ccc(OC)cc3)N2C)cc1	4	26.2485	503.633	7.44562	18	7	2	5	0	253.028	1418	7.80645	4.23129	4.125	4.08109	2.64634	2.87793	3.02887	22.871	25.0769	19.2411	16.0417	17.0816	16.7632	223.772	209.782	161.633	169.467	185.958	160.498	144.851	152.919	153.853	157.71	160.868	160.704	157.974	157.888	78.9802	-8.44537	-66.2196	-29.9781	46.8824	-19.5432	-56.3559	-48.1093	16.3455	-4.69823
342	COc1cc(-c2nc3sc4c(c3c(=O)n2-c2ccc3c(C)c5ccc(N)cc5nc3c2)CCCC4)cc(OC)c1OC	25	33.7031	561.379	7.76548	29	9	4	4	0	258.392	1926	8.2284	5.27211	4.96088	3.58878	3.0439	2.90426	2.91457	26.75	27.7179	24.2424	22.4921	20.7551	21.1173	240.891	243.975	205.32	208.523	207.078	158.692	143.966	150.979	150.595	152.476	157.122	155.37	157.373	153.952	127.095	100.864	86.93	-36.4938	-161.067	-34.546	50.6516	-39.546	30.875	20.1875
412	O=C(Nc1ncc(-c2ccc(Cl)cc2)[nH]1)C1=NNCC1c1ccccc1	24	20.5631	206.796	6.28725	17	7	5	1	1	167.033	1298	8.32393	4.73134	4.6629	3.97698	3.23333	3.24086	3.17096	30.9048	28.4889	20.1895	20.1413	20.6866	19.1525	249.55	205.895	180.833	180.163	192.55	161.371	148.571	151.474	158.129	159.528	165.088	167.688	165.87	160.632	27.8807	-10.454	-21.2442	29.2785	-5.73251	-18.3594	-34.1674	-32.6763	5.21769	-5.37642
1253	Cc1c(-c2nnc(-c3ccc(Cl)cc3)o2)sc2ncnc(N3CCOCC3)c12	18	22.5631	352.552	6.89482	20	9	5	2	1	140.731	1618	9.18294	4.34091	4.08254	3.19843	2.7651	2.46688	2.63186	36.7727	32.2708	26.7292	24.5941	21.8523	19.4143	256.688	232.031	209.862	208.723	186.487	160.69	146.432	155.412	155.304	157.545	163.223	156.617	160.435	160.687	65.3853	28.1131	2.33405	-23.0632	-101.461	-12.8193	62.8013	-50.1899	11.2231	5.80165
746	Fc1cc(F)c2nc(-c3ccc(-n4cncn4)cc3)n(Cc3cccc(C(F)(F)F)c3)c2c1	21	26.5542	456.244	7.31695	26	10	5	0	5	445.812	1492	13.6596	8.07619	8.87619	9.48537	4.0703	4.31296	5.42249	31.7447	30.9608	24.6117	22.6261	23.4571	24.3524	261.231	238.29	223.15	213.428	225.858	171.895	149.709	159.82	158.847	167.476	161.497	165.59	159.407	170.419	43.0589	29.0444	-42.5378	-36.2123	-64.3219	-83.3694	59.0448	-0.827524	3.63966	-3.69488
1826	COc1cc(/C=N/N=c2\scc(-c3cc(O)ccc3O)n2-c2ccccc2)ccc1O	15	24.1272	749.435	7.75072	23	8	3	4	0	242.67	1506	8.96889	5.05611	4.71685	4.8534	3.37302	3.3829	3.31179	30.12	29.566	24.2255	23	20.2871	19.9462	250.475	232.091	213.627	212.2	201.381	158.251	145.241	147.985	153.056	156.619	157.712	156.171	158.778	156.12	37.2503	-8.61298	-32.2405	-33.8516	-12.9785	-10.9147	5.73973	-62.5648	12.8428	-0.1168
741	Cc1cc(=O)oc2cc(Oc3nc(Nc4ccc(N5C(=O)CSC5c5ccc(O)cc5)cc4)nc(N(C)C)n3)ccc12	21	33.6073	862.026	8.19437	28	12	6	5	0	326.309	1976	9.44771	5.60476	5.53333	4.79866	3.44256	3.20569	3.53556	29.0588	29.3014	23.9392	20.8333	20.15	19.8	244.887	230.482	202.924	194.943	201.027	160.496	146.558	154.191	153.554	160.032	157.762	161.826	160.312	157.507	106.311	74.1769	-78.2265	-6.81084	-95.5275	-81.0684	-38.4829	10.6544	15.6886	-0.712803
2152	Cc1cc(SCc2nnc(-c3ccccc3)o2)nc(SCc2nnc(-c3ccccc3)o2)n1	14	26.1915	242.274	6.68399	28	10	6	2	0	174.84	1780	9.31155	4.66667	4.825	3.42824	3.00907	2.46317	2.84321	34.902	32.7636	26.596	27.5253	24.8791	25.4	262.483	227.408	222.436	230.427	198.475	158.78	145.037	149.886	155.216	159.911	159.38	155.293	158.35	159.798	79.477	54.6757	-101.979	-94.9313	-20.1707	6.06143	94.1996	-50.237	7.09496	-0.00884275
625	COc1ccc(C2SC(S)NN2C(=O)c2ccc(Nc3nc(-c4ccccc4)nc4ccccc34)cc2)cc1[N+](=O)[O-]	22	33.3076	531.479	7.71075	28	12	6	4	0	339.614	2166	9.3902	5.05007	4.51829	5.14566	3.24001	3.08918	3.59271	32.8182	30.662	24.527	23.6562	21.4877	19.5839	257.129	232.841	223.442	215.706	212.256	158.572	145.854	149.248	153.458	158.501	157.584	155.672	153.242	157.908	68.3138	36.009	15.8369	-55.6651	-129.237	-151.09	17.9776	36.2863	13.1644	0.613407
936	C=C1C(O)[C@@]23CC[C@H](C(=C)C)[C@@](C)(CCC(=O)O)[C@@H]2CC[C@@H]1C3	20	18.1252	222.579	6.23819	0	3	0	3	0	211.319	942	4.5283	1.4902	1.31532	3.98716	2.12189	2.91449	3.77928	17.7736	20.3636	14.3772	10.7241	9.88889	7.86486	189.661	185.077	125.018	104.976	114.916	163.015	143.769	149.578	151.784	158.537	161.684	168.48	166.124	174.268	45.8394	5.64614	-86.4724	-88.3225	29.0107	70.8327	3.85902	-61.3165	20.3115	0.240655
2629	Cc1c(C(N)=O)sc2nc(C)n(/N=c3\scc(-c4ccc(Br)cc4)n3Cc3ccccc3)c(=O)c12	12	27.8291	650.61	7.73067	26	10	5	2	1	245.557	3030	8.54466	4.6603	4.12143	4.46468	3.38795	3.06651	2.8203	55.0909	34.4237	30.9145	27.2308	30.1923	22.5571	268.289	249.332	221.519	226.399	227.79	157.264	144.601	149.447	152.479	154.508	158.528	155.563	153.998	156.315	71.8887	35.7557	-26.4574	-12.3088	-75.0723	-13.4592	-87.8782	-4.10007	16.554	3.89025
505	O=C(O)CNC(=O)c1ccc(NC(=S)NNS(=O)(=O)c2ccccc2)cc1	23	20.4523	359.997	6.87935	12	11	4	5	0	329.702	1620	9.64858	4.90547	4.97268	7.66749	3.61242	3.94643	4.26402	37.6744	35.6591	24.2174	24.3077	24.2985	24.8689	244.706	202.333	192.535	188.592	197.273	162.192	149.792	153.37	158.757	162.619	162.846	161.75	160.55	160.522	-12.2449	3.86215	-33.1595	-55.6743	21.6278	-4.05613	7.04657	-27.9748	1.64089	-9.18442
2209	CCOC(=O)c1sc(NC(=S)NC2CCCCC2)nc1C	13	15.8036	225.397	6.1598	5	7	3	2	0	143.017	1312	5.83069	2.11111	1.8172	3.40517	2.3048	2.41935	2.06063	31.2381	27.2558	18.29	20.883	19.4203	15.3065	212.816	162.468	173.564	183.89	166.209	163.754	148.012	156.407	163.271	162.586	163.999	157.439	162.465	161.947	57.3321	44.2509	16.419	24.2572	-53.1829	-38.6478	-36.2192	-37.385	7.37132	3.86735
3911	CCOC(=O)C1C(C)SC2C1C(=O)NC1C(C#N)C(c3ccc(Cl)cc3)C(C#N)C(=N)N12	6	24.77	379.448	7.10187	6	10	5	3	1	308.592	1796	8.1861	3.45591	3.2966	5.71467	3.99121	3.46448	3.71717	33.2593	29.4035	22.4106	23.7679	17.8194	19.5455	240.143	214.397	194.157	184.097	165.442	161.958	145.537	150.798	156.296	158.403	160.672	161.639	165.261	166.484	56.9677	20.0316	-24.9631	-61.3238	-9.84604	-35.4788	1.88552	-32.368	15.856	7.87106
1367	O=[N+]([O-])c1ccc(C2CC(c3cccc4ccccc34)=NN2c2ccc([N+](=O)[O-])cc2[N+](=O)[O-])cc1	17	28.5362	380.121	7.22142	22	11	5	6	0	462.361	1546	12	6.61029	6.85211	8.72379	4.74365	3.85417	4.40336	29.1698	30.0175	22.6984	21.6906	21.25	21.4366	257.194	234.113	207.213	210.114	218.93	160.045	147.496	147.139	154.248	157.532	159.289	157.884	156.597	155.493	48.9619	35.5105	-21.9829	-81.7907	3.822	81.2706	11.9313	-21.9277	8.03987	-4.04414
3116	O=C1Nc2cc3c(-c4ccccc4)c(-c4ccccc4)n(-c4ccccc4)c(=O)c3cc2C(c2ccccc2)N1	10	32.2604	556.33	7.70766	34	5	3	2	0	262.611	1560	8.12308	4.51046	3.85153	4.04017	3.41898	3.06137	2.95439	24	26.3944	20.472	20.8035	17.4728	15.393	257.891	235.062	250.309	239.626	208.133	154.852	141.701	144.26	150.191	151.811	149.329	148.776	151.961	155.631	46.0814	21.0185	49.872	51.2963	-27.377	-154.715	-134.193	-28.3796	15.04	8.08
4222	COc1ccc(C(CC(=O)c2cc3ccccc3o2)Nc2ccc(C(=O)O)cc2)cc1	1	24.208	408.178	7.14311	21	6	1	5	0	270.778	1290	8.84615	4.87069	4.97479	5.20726	3.33992	3.27634	3.17554	24.8077	26.3455	19.5172	16.856	18.0862	17.6218	241.653	212.044	178.138	195.472	201.812	157.531	142.959	147.59	153.278	156.169	157.871	155.924	154.374	156.545	46.3033	-10.287	-81.9408	-67.1849	53.0044	18.5178	-61.3254	19.5547	9.15348	-7.22263
3061	Cc1ccccc1OCc1ccccc1-c1nc(-c2ccc([N+](=O)[O-])cc2)cs1	10	22.7534	320.11	6.83338	23	6	2	3	0	235.92	1392	8.77541	5.28968	3.7354	5.01958	2.5224	3.27925	2.7942	29.617	29.24	22.2525	20.6481	22.6429	20.6495	256.021	229.248	195.748	211.316	235.517	155.978	141.986	145.713	150.004	155.315	156.173	152.39	148.774	150.762	46.1777	10.2341	-45.2366	-80.9519	22.4148	49.4186	-17.6899	-37.6592	9.02535	-4.46446
162	C(=N\Nc1nc2nc3ccccc3nc2s1)\c1cn(-c2ccccc2)nc1-c1cccs1	28	25.9608	320.577	6.93327	29	9	7	0	0	152.09	1698	9.29551	5.5125	5.49306	3.23596	2.77399	2.83835	2.76806	36.1277	33.75	26.1979	26.4556	26.4	26.1375	278.806	233.267	240.635	230.774	229.488	157.093	145.511	148.433	156.654	159.082	156.763	154.193	157.273	156.231	35.9997	5.21302	23.1138	-23.2537	-39.0855	-52.5762	-13.3594	-0.446909	7.18425	0.949298
2269	Nc1[nH]c(=O)nc2c1C(c1c(-c3ccccc3)[nH]c3ccccc13)C=C(c1ccc(Cl)cc1)O2	13	27.5414	404.329	7.22601	27	7	4	2	1	210.672	1604	8.785	5.24817	4.24163	3.97494	3.06567	3.14467	3.23582	30.2642	28.7241	22.7063	21.763	20.4072	18.5422	262.935	239.455	228.954	233.743	217.196	156.998	144.643	145.644	151.127	154.163	153.565	151.8	154.316	159.298	41.42	27.7967	-2.99253	2.25044	-16.2892	11.0196	-99.1988	-113.165	11.3895	3.32431
1163	N#CC1=C(N)OC2=C(CNc3c2cccc3[N+](=O)[O-])C1c1ccc(Cl)cc1	18	21.2868	225.473	6.41145	12	8	4	3	1	264.366	1374	10.5901	4.59877	5.07744	6.60916	4.1399	3.23928	4.27136	34.35	30.7209	25.2292	22.9266	19.7333	24.9091	264.433	248.649	214.087	191.662	182.89	159.562	147.137	146.83	150.731	156.882	156.071	161.724	163.959	164.192	32.8781	25.2544	1.7958	-42.6384	-80.3431	-60.157	42.1173	33.5662	9.76688	1.19938
129	Cc1ccc(NC(=O)CSc2nnc(-c3cc(F)c(Cl)cc3Cl)n2N)c(C)c1	30	21.7363	623.165	7.46443	17	10	5	1	3	235.32	1888	9.0376	3.77778	5.44379	5.34817	3.86039	2.83781	3.41939	42.9091	33.1087	32.0225	25.72	25.7206	28.0702	257.622	242.249	195.505	178.946	193.663	164.314	149.816	153.633	155.862	164.038	164.531	167.961	162.85	158.887	66.1776	29.6774	-91.1222	-14.1382	31.0533	84.4241	6.70228	-3.18802	10.9669	-4.33058
1834	Cc1ccc(NS(=O)(=O)Cc2nnc(CS(=O)(=O)C3CNN=C3S(=O)(=O)c3ccc(C)cc3)n2N)cc1	15	29.2598	1092.19	8.30428	17	16	7	6	0	446.787	2276	9.11828	4.40662	5.59288	7.20625	4.02531	3.99277	5.43785	36.7097	40.0462	27.8231	26.8841	24.4326	22.0076	233.271	209.287	182.396	194.806	182.004	164.5	148.433	154.082	158.821	163.801	166.315	163.536	165.862	166.277	3.74887	72.4894	-132.162	54.881	144.538	-88.0557	-117.029	42.6542	10.1688	-7.37461
4496	CC1(C)CC(=[N+]2CCCC2)C=CN1Cc1ccc(Cl)cc1	0	16.5886	161.018	5.82345	6	3	2	0	1	87.9845	1059	4.12455	0.857272	0.96005	1.95521	1.89291	1.60737	1.44063	23.5333	22.8511	14.6134	11.0217	8.66667	10.8202	207.998	174.817	143.836	151.451	115.293	162.466	145.354	155.359	158.741	161.193	162.714	158.896	164.893	170.093	44.9267	-13.0444	-53.2023	1.90855	-22.6347	-39.3591	16.0434	40.9976	8.83951	-8.81481
3950	O=C(Nc1ccc(S(=O)(=O)Nc2cccc([N+](=O)[O-])c2)cc1)c1cn(CCO)c2c(cc(Cl)c3ncccc32)c1=O	5	32.259	4240.5	9.76342	26	14	5	7	1	485.027	2230	10.9844	6.22069	5.59892	7.95126	4.19713	5.62861	4.46331	36.5574	34.7692	26.958	25.9805	23.1517	21.7154	260.47	238.608	221.027	208.964	194.508	159.863	146.222	149.945	154.791	157.946	156.35	157.732	160.952	160.35	15.7526	41.5136	15.8763	-39.2497	-120.106	-114.02	6.61494	32.7062	9.6466	0.27197
4219	CCCCCCCCCCCCCCCCCc1nnc(-c2ccccc2)n1N	1.6	21.2013	187526	13.2064	11	4	4	0	0	148.333	1138	3.40845	0.790123	0.810458	2.0892	1.73627	1.64146	1.62418	16.0282	19.2222	10.0642	9.71892	8.37037	8.36601	181.221	131.562	126.779	123.732	120.409	165.935	147.783	155.117	164.064	166.295	166.412	165.814	165.374	165.269	70.559	76.5701	82.0571	20.263	8.46697	-17.3335	-17.045	-7.73815	9.00754	1.62984
2139	O=C(CCNC12CC3CC(CC(C3)C1)C2)c1ccc([N+](=O)[O-])cc1	14	19.3392	1277.59	8.0282	6	5	2	3	0	244.257	998	6.5	3.59524	2.77333	5.08869	2.08574	3.76786	2.96333	20.7917	23.2745	13.3289	9.90361	14.5	15.0533	206.846	163.725	129.008	130.531	157.161	163.041	145.536	149.853	158.181	165.909	164.873	165.138	163.263	158.41	44.6667	14.3333	-6.44444	36.4444	42.7778	110.222	35.3333	-65.3333	5.04688	-10.9531
2425	O=C(N/N=C/c1ccccc1)c1ccc(-n2c(-c3ccccc3)nc3c(Br)cc(Br)cc3c2=O)cc1	12	28.3983	3640.88	9.48091	28	8	4	2	2	245.073	3800	9.1136	4.87664	4.54463	4.53839	3.4244	3.09555	3.30662	70.3704	34.069	30.6033	39.0744	29.621	29.0328	282.053	244.471	243.543	251.761	236.126	155.07	142.768	145.784	151.998	157.732	156.54	150.689	149.517	153.861	38.2715	11.8618	43.5189	-2.72552	-93.903	-113.2	-43.8427	54.1522	8.58162	-1.51166
1942	C/C(=C/CC/C=C/CO)CC/C=C(/C)CC/C=C(\C)CO	14.67	14.4703	161.484	5.82634	0	2	0	2	0	162.333	844	3.35849	1.06863	0.79661	3.06289	1.88347	2.10866	1.86535	15.9245	18.0769	10.6348	8.81203	9.95098	7.72881	178.76	148.047	117.19	122	140.436	164.101	145.251	154.673	156.751	161.963	164.531	164.747	157.257	165.772	14.0345	-48.0826	-35.6881	-1.34745	24.4169	-9.88893	-22.2581	15.4724	4.38092	-8.25205
49	Fc1cccc(-c2nc3ccccc3n2Cc2cn(-c3ccc(F)c(F)c3F)nn2)c1	33	24.8628	320.483	6.90123	26	9	5	0	4	378.028	1374	13.2727	6.42708	6.83529	8.59154	3.95602	3.90914	4.06405	31.2273	30.9167	25.6122	23.6869	20.2188	20.4118	264.687	231.159	231.813	221.492	199.212	169.632	149.37	154.399	164.663	169.1	162.855	160.402	165.305	169.433	46.8512	9.09917	-5.73554	-59.6364	-8.60331	38.2479	1.06612	11.6116	6.77893	-4.03822
4463	CC1=C(N)C(=O)C(C(C)(C)CC(=O)O)=C(C)C1=O	0	13.5072	93.0695	5.12113	0	5	1	4	0	255.257	790	7.94286	2.53448	0.282051	7.29306	3.87355	4.77874	2.47863	22.5714	23.0857	20.3077	15.6727	10.0345	4.97436	204.086	218.951	144.68	105.684	98.3244	164.142	147.13	153.116	149.77	160.353	162.372	173.515	171.266	180.398	70.6286	59.5927	-44.2506	-120.453	-205.313	64.7355	84.9331	31.689	14.4286	0.476735
3510	COc1c(C(=O)O)c(O)c(N)c2occc12	8	12.1753	76.1671	4.80293	9	6	1	5	0	201.944	738	11.92	0	0	8.07778	4.86667	2.1087	1	29.52	29.3077	29.2667	28.0189	3.34783	1	233.608	255.478	166.282	102.11	55.927	162.828	150.364	152.336	151.342	157.615	160.889	174.72	182.465	184.918	26.6096	29.664	-2.008	-21.4912	-120.622	-101.28	78.4608	48.7872	12.0384	6.376
292	CCN(CC)c1cccc(OCc2cc(=O)oc3ccc(Cl)cc23)c1	25	19.1893	336.678	6.73542	16	5	1	3	1	165.505	1270	7.369	3.6301	3.72889	3.6779	2.43633	2.67998	2.60881	28.2222	26.2979	19.87	18.3654	17.4557	17.2267	233.077	206.812	162.061	156.884	182.147	159.333	143.584	152.93	156.764	152.909	159.648	161.946	157.625	157.611	69.7839	43.3199	-11.0431	-18.8569	29.2546	19.0175	2.90327	24.7478	10.8084	3.71358
1385	CSc1ccc(Cc2nnc3sc(-c4cc(F)c(Cl)cc4Cl)nn23)cc1	17	20.6321	329.4	6.75278	20	9	4	0	3	165.712	1990	9.57024	6.26757	4.56481	4.4787	3.18376	3.24393	2.82184	53.7838	38.9	35.7568	33.6579	35.6122	31.2708	294.419	268.064	219.979	245.713	258.21	159.165	144.547	148.585	153.648	157.088	162.265	162.025	155.721	156.777	50.8365	29.0891	-32.4751	27.2784	46.2744	-3.92653	-21.7564	7.36484	7.35208	-1.78598
3109	N#Cc1c(Nc2cccc(C(F)(F)F)c2)nc(SCc2ccc(Cl)cc2)nc1-c1ccccc1	10	26.5662	454.697	7.34341	24	9	4	0	4	357.543	1900	10.721	7.11435	6.74486	7.15087	3.94462	4.05038	3.96789	38	32.283	26.1028	24.5841	25.8835	24.9722	273.808	240.805	243.458	249.511	244.255	163.193	144.359	151.705	153.525	163.379	159.438	159.423	156.963	154.822	40.1221	64.9641	27.7279	13.9554	-18.9709	-139.022	-33.3969	2.39482	2.92	-3.4
1996	Nc1nnc(Cc2noc3ccccc23)s1	14	12.7564	91.3571	4.98478	14	6	4	1	0	95.809	884	10.0185	5	2.64706	3.99204	3.1284	3.61785	3.33224	36.8333	34.1154	23.2889	21.9767	23.9545	15.1765	261.261	219.909	212.726	197.719	200.574	161.876	150.216	149.509	157.437	161.802	161.586	162.807	165.398	166.96	28.5432	3.69136	-26.8148	-79.321	8.98765	56.3704	-17.6543	-48.1605	4.38889	-0.861111
1406	O=C1CCSSCCC(=O)Nc2cccc(n2)NC(=O)CCSSCCC(=O)Nc2cccc(n2)N1	17	27.3076	320.283	7.05014	12	14	6	4	0	330.903	2392	7.64158	2.38961	3.06306	5.33714	2.93047	2.85682	3.19499	38.5806	36.375	21.9143	26.4154	22.3377	23.6757	239.324	188.78	197.205	184.234	181.676	161.869	147.602	152.96	162.024	159.867	158.413	158.904	160.974	161.384	80.789	71.1146	-39.5877	-68.6438	-63.4376	-56.4523	-180.509	-15.0769	1.92924	-5.17586
2826	Cn1cc(CCC(=O)NCCCc2c[nH]c3ccc(OC(F)(F)F)cc23)c2cc(Cl)ccc21	11	26.0586	1962.06	8.77568	18	9	3	2	4	368.373	1694	9.45723	4.31676	3.17429	6.5781	3.04585	3.5603	3.89916	30.25	27.6949	18.8846	17.2553	18.0614	17.6569	233.521	202.542	163.251	156.176	164.202	167.493	148.145	158.392	156.187	159.603	164.262	167.078	167.241	172.182	74.901	115.424	-60.2943	-76.9977	12.6677	109.155	72.9305	-201.924	6.25861	1.5456
427	COc1ccc(C2=NN(c3ccccc3)C(c3ccc(OC)cc3)C2)cc1	24	21.0514	266.716	6.57944	18	4	2	2	0	140.194	1076	7.14286	4.01905	2.89565	2.86111	2.33286	2.66667	2.3913	21.9592	24.8269	18.4579	16.6609	16.9619	13.6087	231.513	210.987	175.963	185.797	204.435	158.731	143.726	151.03	154.308	155.159	158.924	156.627	151.213	156.457	57.8817	-18.5527	-73.212	-52.2145	31.3369	12.3203	-33.9767	-8.86756	12.9117	-0.00957934
176	Fc1cccc(-c2nc3ccccc3n2Cc2cn(-c3ccccc3)nn2)c1	28	22.5346	365.678	6.93137	26	6	5	0	1	192.694	1134	9.45455	5.10417	5.25882	4.37942	3.10764	3.12558	3.39804	25.7727	27.9167	20.3878	19.5657	17.8021	17.8706	254.735	216.769	223.017	213.56	192.038	161.543	146.679	151.087	158.507	163.463	158.41	157.356	161.624	166.036	46.5289	2.40496	-42.5868	-54.1818	-6.7438	9.87603	-4.21488	-4.66942	7.40496	-0.876033
2297	CC12CCC(C/C1=N\Nc1nc3ccccc3[nH]c1=O)C2(C)C	13	18.6721	815.602	7.53684	10	5	4	1	0	155.042	930	6.44444	3.72464	2.41667	3.44537	3.05175	3.07146	3.16512	20.6667	23.5625	16.935	10.8456	17.7826	16.0833	211.04	190.254	101.688	190.887	189.753	164.02	147.637	152.384	156.289	164.597	177.29	164.463	162.496	160.991	78.2237	51.681	-27.717	48.9773	169.518	-28.1768	-79.877	-181.342	17.0681	-9.83753
3002	COCCSc1nc(-c2ccccc2)c(C#N)c(=O)[nH]1	10	14.8373	210.295	6.04166	12	6	3	2	0	174.559	1048	8.74074	3.54902	2.21739	5.28967	3.90228	3.90541	2.99054	31.7576	30.0294	24.3594	24.9524	18.1569	13.0652	245.237	223.029	212.014	208.725	179.461	160.333	145.338	152.713	153.703	159.745	158.385	156.698	162.071	161.032	37.8853	20.2245	44.391	47.0343	4.21988	-107.321	-81.9397	-28.9723	7.44444	4.77778
1363	O=C(Nc1nnc(SCc2ccccc2)s1)c1ccnc2ccccc12	17	20.4942	554.258	7.27314	21	7	4	1	0	162.785	1470	8.57222	5.45455	5.47101	4.06962	2.99602	3.00954	3.23564	36.75	33.2558	25	24.3659	28.9273	27.413	271.63	232.445	213.611	224.981	230.826	156.075	143.184	145.679	151.485	155.31	157.63	158.136	158.544	157.975	28.0856	-2.82	-10.8578	1.80889	30.0411	-1.43556	-18.9944	-46.7067	4.92	-1.68
2157	O=C(Nc1ccc([N+](=O)[O-])cc1)C1=C2c3ccccc3S(=O)(=O)N2CC1	14	20.7862	932.159	7.79302	12	9	3	5	0	342.077	1348	11.3447	4.71429	5.96721	8.77121	5.0849	3.3836	4.84699	34.5641	36.3095	25.8602	23.2188	18.7857	21.5902	256.732	231.926	195.351	194.09	185.683	159.686	145.417	149.635	153.412	159.211	160.205	158.738	160.022	157.347	9.29542	52.224	9.92439	-105.948	-135.066	25.9179	18.5797	79.5168	7.40434	1.5503
710	Cc1ccc(-[n+]2noc(O)c2CN2CCN(C)CC2)cc1	21	16.4703	156.247	5.79337	11	6	4	2	0	135.389	885	6.52381	2.53659	1.40845	3.22354	3.18946	2.75203	2.32394	21.0714	24.1136	16.2245	12.025	13.4878	11.9155	200.275	179.379	143.159	174.758	149.295	166.692	151.534	162.241	160.33	166.223	169.359	165.305	166.783	161.262	61.8889	17	1.22222	69	26.5556	-125	-84.2222	-67.7778	10.161	-3.69728
4371	COc1ccc(/C=C/C(=O)c2ccc(OC)c(OC)c2)cc1	0	16.292	196.167	6.06743	12	4	0	4	0	168.417	922	8.1	3.46774	3.94643	4.21042	3.09084	3.14068	3.11905	23.05	24.878	20.8767	16.7195	14.8871	15.1786	226.209	225.538	158.405	161.22	172.879	158.816	142.886	153.081	149.596	152.755	159.519	159.278	158.424	156.512	54.2525	-15.185	-48.6675	-76.245	11.32	26.535	-25.045	12.74	11.36	-1.04
809	O=C(Nc1cccc(Cl)c1)Nc1c(-c2ccc(F)cc2)nc2ccccc2c1O	20	22.8628	467.795	7.21274	22	7	3	2	2	263.089	1452	9.90011	5.82589	5.44325	5.97929	4.08077	3.88293	4.03449	33	29.5745	23.7449	23.1031	20.6598	20.3011	264.258	230.393	221.815	218.936	209.261	159.99	145.495	147.274	156.765	159.712	159.312	157.763	157.517	159.784	24.1011	0.878431	-14.9111	-21.0615	-14.1475	-44.4291	-15.3079	-19.813	6.01188	-3.04029
451	CCOC(=O)C1CCC(c2ccc(OC)cc2)=NO1	23.66	14.1706	121.02	5.43781	6	5	1	4	0	155.389	826	8.11111	3.36538	3.17073	4.31636	2.32449	2.79594	3.30759	22.9444	24.8649	18.013	17.2676	13.9038	15.1951	210.182	181.208	152.174	138.484	145.763	163.105	146.115	155.867	161.006	159.439	162.332	164.678	164.515	164.097	64.0123	22.1235	-39.9383	-100.79	-39.6543	31.2593	20.5309	-42.9383	8.25694	0.277778
1521	COCCn1c(S)nnc1-c1cnc2c(C(F)(F)F)cccc2c1NC1CC1	16	22.1618	273.061	6.63931	15	10	5	1	3	312.84	1474	10.6371	3.93848	4.45388	6.80086	3.49098	3.01653	3.80517	32.0435	29.3878	24.2165	24.1009	18.3719	20.0849	233.558	221.478	212.328	195.195	174.661	171.097	150.744	163.396	160.757	165.443	163.791	164.957	168.538	167.901	76.8508	101.135	66.4902	29.2156	-45.832	-137.278	-112.594	3.33742	10.6824	7.86578
2251	Fc1ccc2c(c1)Sc1cccnc1N2CCCCCCN1c2ccc(F)cc2Sc2cccnc21	13	28.8866	308.914	7.014	24	8	4	0	2	268.118	1902	8.18148	2.34151	2.12077	4.46863	2.42173	2.66178	2.43867	31.7	30.0923	23.5629	21.7105	13.8344	13.4638	252.09	214.381	197.377	173.412	157.335	160.917	143.698	150.788	157.838	157.442	154.858	158.037	162.848	162.818	64.9414	44.716	16.2809	-95.4198	-45.3179	-66.358	-68.3858	-49.2407	11.8722	8.09778
3497	O=c1c2c3c(sc2nc2sc(-c4cc(Cl)cc(Cl)c4)nn12)CCCC3	8	20.5512	255.81	6.46073	18	8	3	1	2	135.24	1924	8.78052	4.76871	4.23977	3.75666	3.51208	3.04581	2.74339	53.4444	38.425	30.9659	38.0494	32.9184	39.1316	296.932	247.613	247.844	251.143	250.718	154.437	141.365	146.03	151.886	152.539	157.926	160.341	153.805	145.657	44.0258	47.269	104.763	43.6749	-62.2257	-125.332	-88.4187	-46.9919	5.86111	6.98611
2348	N=c1sc(-c2ccc(F)cc2)nn1CC(=O)N1c2ccccc2Sc2ccc(C(F)(F)F)cc21	13	27.3303	553.777	7.54054	23	11	4	1	4	437.43	1938	12.5602	7.70833	6.72717	9.11313	4.08265	5.42634	5.03582	40.375	35.2308	29.8972	27.3982	26.6696	28.5545	276.405	254.298	240.168	229.097	212.631	165.925	146.394	153.932	156.055	159.926	159.155	158.285	163.97	170.534	34.716	27.8272	-38.4198	-55.3457	-22.716	-19.0123	110.864	-56.9753	4.6875	-1.67188
2441	COc1ccc(-c2nc(NCCON3C(=O)c4ccccc4C3=O)nc3c2SC2=NC(c4ccccc4)(c4ccccc4)C(=O)N23)cc1	12	38.5894	7222.66	10.4536	30	12	6	5	0	360.121	2192	9.8979	5.57963	6.32381	4.86651	3.39255	3.00316	3.39146	29.6216	29.963	25.9	25.5028	21.4167	21.3829	259.37	241.288	227.059	221.956	213.105	157.763	144.306	150.111	153.71	155.737	157.089	155.909	155.802	158.525	88.3763	73.7283	102.04	-53.0075	-170.38	-132.865	-63.0118	50.4147	22.8598	15.7392
52	CCOC(=O)C1C2NC(=N)C3CCCCC3C2NN1c1ccc(Cl)cc1	33	20.5107	254.278	6.49394	6	7	4	2	1	180.811	1322	6.1099	2.09127	1.30534	3.54531	2.77389	2.53806	2.4375	25.9216	24.963	16.6913	16.0063	14.7143	14.252	210.469	173.27	157.767	157.685	159.88	165.021	148.947	154.422	163.012	164.602	166.264	165.754	162.405	161.197	54.9473	34.0096	14.5712	6.87143	-40.2408	-57.9306	-119.394	-110.268	12.2399	4.66513
2168	CC1(C)[C@H]2CC[C@]1(C)[C@H](OC(=O)C1=C3c4ccccc4S(=O)(=O)N3CC1)C2	14	22.2809	195.946	6.27109	6	6	1	4	0	248.174	1342	6.89316	2.64706	2.10324	4.77259	4.5838	2.63378	2.17043	25.8077	29.1786	19.375	13.8984	16.3725	16.1327	218.781	201.259	123.692	193.938	182.685	160.5	142.041	150.581	151.521	160.031	169.998	155.646	156.556	156.321	52.694	100.815	-0.343524	46.2339	85.3739	-49.4735	-112.08	-66.3927	22.2544	-1.48484
3668	COc1cc2nc(Sc3sc(N)nc3C)n(Cc3ccccc3)c(=O)c2cc1OC	8	23.4201	313.972	6.84792	21	9	4	3	0	202.368	1676	8.45778	4.44818	3.90725	4.04736	3.1392	3.22476	3.08113	33.52	31.283	28.4694	25.3036	23.2017	21.1217	246.63	247.633	217.956	218.644	214.731	159.54	145.713	153.617	150.916	154.238	156.737	156.401	156.503	154.21	69.0578	16.4089	-19.2756	-19.0356	31.92	-15.12	-127.316	-99.0222	17.3152	7.2608
3795	N#Cc1nnc2c(C#N)c(N3CCCCC3)nn2c1N	7	15.4231	143.419	5.65892	9	8	8	0	0	172.639	836	9.875	3.14	2.02381	5.39497	4.11635	3.98333	3.67857	26.125	28.1765	20.5897	19.6364	16.02	11.9286	231.304	191.206	192.017	200.157	170.082	169.702	155.599	160.456	167.068	170.666	166.99	166.766	171.145	172.405	66.6562	102.172	139.344	68.5781	-66.2656	-151.172	-140.469	-43.8438	10.125	5.6875
435	COc1ccc2oc(=O)cc(COc3cccc(OCc4cc(=O)oc5ccc(OC)cc45)c3)c2c1	24	28.3413	302.854	6.99418	26	8	0	8	0	287.333	1542	10.3103	5.73333	4.93023	4.95402	3.28613	3.4787	3.29457	26.5862	28.0645	22.876	19.8582	19.6167	17.4884	246.094	236.786	181.09	200.471	206.751	156.932	142.132	150.14	149.873	152.034	158.489	155.344	152.956	158.932	78.4376	-16.3936	-106.212	-34.2378	43.5517	-42.5101	34.9203	-23.2331	12.5779	1.42568
4137	C/C(=N\NC(=O)/C(C#N)=C\c1cn(-c2ccccc2)nc1-c1cc2ccccc2o1)c1[nH]c(-c2ccccc2)nc1C	4	33.2387	2019.93	9.0459	31	9	7	2	0	284.111	1684	9.07463	6.26144	5.47205	4.24046	3.62031	3.70261	3.50587	25.1343	27.3056	21.4366	20.4161	20.6209	18.5466	252.077	224.269	209.253	218.568	217.054	159.056	145.745	149.396	155.663	160.386	159.385	157.319	155.528	158.381	88.9082	44.62	-44.0782	-47.7679	10.4551	22.8296	12.5587	-8.38516	16.176	-1.27534
1708	CCOc1ccc(NC(=O)CNc2ccc(-c3nc(N4CC(C)CC(C)C4)nc(N4CC(C)CC(C)C4)n3)cc2)cc1	16	32.9525	4021.93	9.7346	18	9	7	2	0	253.083	1704	5.77011	3.11795	2.17427	2.909	2.50637	2.52236	2.22407	19.5862	22.6374	14.8943	12.6887	16.7179	13.6515	201.274	169.696	170.995	157.457	194.323	165.001	148.149	157.739	160.023	168.835	159.959	170.295	156.713	160.749	130.708	102.068	64.4909	46.5912	-13.7149	-142.342	-198.549	-233.492	16.9534	-1.24006
2122	COc1ccc(-[n+]2noc(O)c2CNc2nc3ccc(OC)cc3s2)cc1	14	21.1608	209.318	6.3371	20	9	4	4	0	177.67	1373	9.37374	5.84932	5.80952	4.03796	3.06665	3.12316	3.5022	31.2045	30.766	25.1059	21.6489	21.4521	23.8413	240.621	228.274	180.347	184.204	191.489	161.818	148.921	155.328	156.3	159.778	161.157	161.373	162.944	160.94	57.4389	2.78972	-59.449	-95.9605	33.6657	52.6841	22.6841	-38.5197	12.9375	2
1239	COC(=O)[C@H]1[C@@H](C(=O)OC)[C@@H]2C=CC=NN2[C@H]1C(=O)c1ccc(Cl)cc1	18	19.8726	255.511	6.49878	6	8	2	5	1	260.311	1372	9.57221	2.70881	2.24074	6.05374	4.16073	3.63696	2.98695	31.907	28.6889	23.0098	22.5789	15.9914	15.8444	237.774	219.542	201.506	184.592	164.061	161.484	145.632	154.065	156.174	159.652	159.496	160.742	163.957	159.783	50.6977	-10.0958	-54.5936	-25.4836	110.816	-58.6579	-244.755	-44.2902	12.6247	4.94321
1341	Cc1ccsc1-c1c(C#N)c(N)nc2c1CCCCC2	17	15.5325	121.425	5.49245	11	4	3	0	0	127.365	996	6.12012	0.516129	0	3.44228	2.91398	2.52967	1.57812	26.9189	26.6667	19.5109	18.802	8.41935	3.09375	233.281	211.687	202.926	181.112	116.958	159.821	143.815	148.718	153.774	154.572	155.465	154.43	168.288	174.783	53.8063	59.1285	36.3585	-22.7701	-85.4952	-132.443	-94.5297	68.4191	12.4091	7.65303
2918	O=c1oc2ccccc2cc1-c1ccc(-c2cn3nc(Cc4noc5ccccc45)sc3n2)cc1	10	28.8177	375.984	7.18231	33	8	4	3	0	212.503	1632	10.4009	6.80087	6.5614	4.16673	3.1394	3.07175	3.17698	32	31.7368	24.4474	22.4386	24.2338	21.6711	277.48	245.223	218.332	226.959	242.821	154.721	142.302	145.116	150.686	154.114	157.011	155.453	151.513	153.711	53.6647	9.08676	-33.0648	-97.7163	-42.843	-0.479773	-3.40412	15.4194	8.07612	-3.91811
838	CSc1nnc2n(C)c3c(=O)n(C)c(=O)n(C)c3n12	20	14.9514	106.957	5.31428	12	9	6	2	0	177.087	1050	10.4014	0.453333	0.0294118	5.71248	3.32734	2.52593	2.38072	33.871	32.3939	32.7966	25.6579	9.3	5.64706	228.955	259.259	189.59	144.555	104.523	168.794	155.561	169.419	155.496	170.746	164.951	168.147	168.865	181.615	101.454	128.039	-26.1413	-197.78	-163.276	-40.126	34.7753	18.109	20.1977	13.1186
3181	Cn1c(=O)cc(Oc2nc(NCCc3cccs3)nc(Nc3ccc(C#N)cc3)n2)c2ccccc21	10	28.3413	1383.7	8.51345	27	10	7	2	0	252.698	1684	9.16569	6.95639	6.19469	4.4333	3.61607	3.51552	3.54818	29.5439	29.6393	21.4919	20.873	24	24.0177	252.578	216.337	193.414	207.904	224.241	160.295	146.752	153.457	156.365	159.753	163.542	163.656	162.144	160.42	68.4161	61.8716	13.2526	-10.9409	-19.0749	-29.0891	-71.8675	-93.0757	9.5414	-1.39428
465	COC(=O)[C@@H](NC(=O)c1cc(I)c(-c2nc3cc(C)c(C)cc3[nH]2)c(I)c1)[C@@H](C)O	23	23.179	447.295	7.20183	15	9	3	4	2	256.962	6798	8.31467	4.0066	3.28662	5.03847	3.11575	3.14349	2.81317	133.294	36.6415	37.6577	59.4186	42.8218	64.6705	259.933	240.478	198.791	213.532	219.68	159.607	145.845	152.669	152.93	158.825	161.638	154.825	154.969	152.54	77.2319	47.3534	-49.3934	-50.4615	-21.2011	-57.8268	0.313785	-57.1128	16.2222	1.33333
2306	COc1cc(-c2nc3sc4c(c3c(=O)n2-c2ccc(S(N)(=O)=O)cc2)CCCC4)cc(OC)c1OC	13	28.4044	457.224	7.40611	21	11	3	6	0	316.608	1968	8.86703	4.84774	5.02675	5.1903	3.20585	2.95847	3.90948	32.2623	33.0154	25.6496	24.3224	22.9753	23.1852	239.129	235.867	205.086	213.517	206.758	159.9	144.323	152.734	151.893	153.798	158.379	155.381	156.723	154.001	72.0269	112.54	78.366	-37.5229	-179.363	-90.5601	4.28027	-25.8636	22.1631	15.4977
1383	O=C(O)CCC(=O)OCn1nnn(-c2ccccc2)c1=S	17	15.8726	380.026	6.68218	11	9	4	4	0	223.791	1152	10.7407	4.7803	6.47748	6.78156	3.79039	3.60859	4.35369	34.9091	30.8529	24.0597	23.9355	19.7273	22.7838	239.115	196.743	202.919	197.029	175.087	164.686	152.424	158.609	162.072	166.938	165.793	164.418	166.594	163.844	41.8642	6.60494	-81.0617	-42.9012	56.2346	-45.7531	-39.2716	15.8642	3.42516	-2.37374
2375	CCOC(=O)C1CCC(c2ccc(C)c(C)c2)=NO1	12.83	14.349	121.145	5.43885	6	4	1	3	0	147.917	800	6.94737	2.07692	2.36538	3.89254	2.34886	2.42821	2.56303	21.0526	23.2821	17.0952	14.9294	11.1077	11.1346	206.206	183.996	140.237	149.08	132.638	162.709	145.113	154.505	158.261	159.202	164.434	162.601	165.676	166.035	72.8892	35.9335	-40.097	-70.5235	-29.7867	-19.2715	1.06094	4.39612	9.98961	-1.26939
4047	COc1ccc(C2CC(c3ccccc3)=Cc3[nH]nc(O)c32)cc1OC	5	20.3728	245.201	6.45759	17	5	2	3	0	166	1066	7.86957	4.44643	3.53684	3.6087	2.67096	2.9065	3.09035	23.1739	25.551	20.2079	17.4915	15.9643	15.4526	231.551	227.052	179.09	176.602	169.434	159.562	145.041	150.296	149.695	152.988	158.146	158.792	161.423	160.327	53	0	-38	-80	-40	41	82	-28	14.9301	3.20416
1325	COc1cc(/C=C2\S/C(=N/c3ccc([N+](=O)[O-])cc3)NC2=O)ccc1O	17	20.1152	203.814	6.27272	12	9	3	5	0	299.92	1348	11.2934	6.9096	7.15646	7.69026	3.92017	4.08783	5.14588	34.5641	32.3659	26.5789	23.3974	25.0678	28.551	256.732	235.103	208.163	207.246	202.276	159.686	147.071	149.63	153.153	157.611	157.383	157.174	160.471	157.176	30.5018	-2.08518	-45.1115	-76.9373	-3.25714	36.743	39.3056	-6.88421	6.33728	-4.43787
3963	Cc1nn2c(-c3nc4ccccc4[nH]3)c(-c3ccc(Cl)cc3)nc2s1	5	20.4822	225.532	6.33475	23	7	5	0	1	112.481	1450	9.02836	4.47641	2.48417	3.04003	2.93848	2.78739	2.3169	39.1892	33.4146	26.8831	25.4459	25.9315	24.7536	278.747	246.052	248.727	262.289	239.247	157.649	145.712	149.36	155.334	160.275	157.714	153.602	157.224	151.374	46.2523	33.3693	24.0564	-10.3937	-44.0147	-75.6867	-126.738	-79.1348	8.88459	4.94522
6	O=C(O)c1cn(C2CC2)c2cc(N3CCNCC3)c(F)cc2c1=O	41	19.2059	205.773	6.20224	10	7	3	3	1	276.972	1050	9.14286	3.34444	2.16883	6.59458	3.84898	4.53704	2.88961	25	26.3333	19.4952	19.6667	15.5778	12.3117	221.797	199.17	182.034	170.211	156.167	166.135	148.893	157.818	162.895	158.332	161.77	165.867	169.447	165.433	54.0612	50.0408	62.7143	40.9184	2.14286	-110.898	-155.735	-51.5714	9.95918	1.44898
3536	Nc1nnc(Sc2nc3ccc(Cl)cc3c(=O)n2-c2ccc(Oc3ccccc3)cc2)s1	8	25.5818	623.032	7.59775	27	10	5	2	1	200.679	1980	9.79334	6.16686	5.42447	4.36258	3.28216	3.2868	3.16149	43.0435	35.7	29.3229	30.8925	29.0619	24.9326	284.77	250.26	265.593	256.744	233.526	156.266	144.701	146.476	153.158	154.935	150.867	149.519	154.512	157.611	33.9456	1.93372	-6.96481	-49.4523	-9.32731	-16.7301	35.54	3.99776	6.67675	0.674858
1204	C/C(=N\c1n[nH]c(/N=C(\C)c2ccccn2)n1)c1ccccn1	18	17.8156	157.299	5.89106	17	7	7	0	0	131.917	934	8.84211	5.16667	4.7619	3.47149	2.94367	3.19856	2.99868	24.5789	26.9	20.5797	19.5821	18.0926	18.4524	235.414	208.611	182.735	163.148	179.209	165.294	150.951	159.544	163.489	161.784	167.674	169.912	173.229	162.985	64.2992	41.8449	-41.626	-62.9252	-25.0277	8.77008	-27.4488	-56.7701	7.90443	0.0948753
4034	c1ccc(CN2C(c3ccccc3)C3=C(NOC3c3c[nH]c4ccccc34)C3CCCCC32)cc1	5	28.5465	499.91	7.46719	21	4	3	1	0	157.556	1358	6	2.82625	2.1673	2.38721	2.21646	2.18404	2.09485	20.5758	24.0556	16.2663	15.5403	14.2587	12.1065	227.863	195.388	191.131	188.285	182.16	158.822	143.795	148.334	154.153	158.898	156.502	156.22	154.841	157.897	54.4463	10.7603	22.9587	19.9669	-19.0909	-82.5207	-94.7355	-96.2562	15.5579	6.07668
4412	COc1ccc(C(=O)/C=C/c2ccc(OC)c(OC)c2)cc1	0	16.292	138.109	5.7165	12	4	0	4	0	168.417	922	8.1	4.06452	4.05357	4.21042	2.9039	3.08154	3.31548	23.05	24.878	20.8767	16.7195	15.3387	15.9286	226.209	225.538	157.457	158.68	171.761	158.816	142.886	153.081	149.596	152.755	159.519	159.275	158.411	156.516	54.2525	-15.185	-49.6675	-88.245	-22.73	50.085	45.105	1.19	11.36	-1.04
2476	O=C1N/C(=N\c2ccc(F)c(Cl)c2)S/C1=C\c1ccccc1	12	17.2179	154.369	5.8278	12	6	2	1	2	195.925	1374	10.0015	5.7702	5.94118	6.12267	3.79369	4.13379	4.08987	42.9375	34.2647	28.6308	26.9821	26.6591	25.4118	283.372	232.157	247.289	240.043	216.973	158.277	142.975	146.111	155.614	158.379	153.315	153.803	160.424	161.504	14.308	-16.2598	-26.7067	-3.97184	48.1382	-13.0054	-42.2525	-26.4899	1.69531	-5.01172
1206	CC1=NNC(=O)C1OCc1cccc(Br)c1	18	12.2681	95.8689	5.03299	6	5	2	2	1	123.773	1858	8.4099	4.061	1.6822	4.58417	2.84584	3.44454	2.77225	68.8148	32.6429	27.2407	20.6727	29.1765	40.1613	245.312	202.512	171.906	187.291	205.069	161.547	147.444	153.898	158.055	163.497	162.867	159.749	158.375	166.898	26.8883	-13.9686	-14.7293	-41.1965	-17.2846	27.7496	-32.19	-16.601	3.77778	-4.77778
3171	Cc1ccccc1-c1cc(=O)c2cc3c(=O)cc(-c4ccccc4C)oc3cc2o1	10	24.1557	285.366	6.75239	26	4	0	4	0	229.833	1210	9.29167	4.91304	4.65854	4.78819	4.21693	3.63768	2.86043	25.2083	27	22.7339	20.5254	18.2174	17.0854	259.094	246.407	204.743	211.762	209.731	153.479	138.971	143.738	147.25	150.932	154.4	153.221	151.963	153.006	72.7569	44.4826	-14.9774	16.4549	30.0365	27.6823	-132.757	-12.3576	13.9236	1.06597
2822	Cc1ccc(OCc2ccccc2-c2nn(CN3CCOCC3)c(=S)o2)cc1	11	22.0178	386.041	6.98556	17	7	3	3	0	144.597	1374	7.38126	4.17391	3.38194	2.83524	2.71608	2.63506	2.3705	26.9412	26.5741	19.0609	15.9921	21.3913	16.1042	227.15	194.58	173.436	214.524	206.976	161.043	146.43	157.103	156.477	161.258	165.602	155.401	150.755	158.895	64.598	-15.9759	-25.9818	41.3219	1.186	-90.6327	-29.1218	-26.4116	8.66667	-2.55556
4190	COc1ccc(C2CC(=NOC(=O)c3ccc(O)cc3)CC(c3ccc(OC)cc3)N2C)cc1	3	26.2889	585.758	7.59668	18	7	2	5	0	253.028	1418	7.80645	4.22297	4.02649	4.08109	2.91922	2.92943	2.89294	22.871	25.0769	18.9929	15.3452	16.7973	16.3775	223.772	208.81	162.492	170.982	183.456	160.498	144.851	152.919	153.853	157.897	160.594	160.284	158.374	158.206	77.9802	-17.4454	-91.4131	-56.9459	71.4225	11.9043	-45.7388	-18.5973	15.3455	-6.69823
3401	COc1cccc2sc(Nc3ncccc3C(=O)N3CCN(CCO)CC3)nc12	9	22.5346	408.928	7.07825	15	9	5	3	0	213.865	1436	7.77778	4.41026	4.25965	4.11278	2.7417	2.77279	3.14688	27.6154	27.8727	20.3866	19.4688	17.9423	19.3789	223.996	197.879	168.289	175.008	180.819	163.632	148.802	158.983	160.236	160.361	164.299	163.426	163.473	158.202	55.8243	4.15105	28.8693	-5.286	-17.8716	-16.1558	17.9274	-17.5327	12.8976	4.24963
2050	O=C(Nc1nnc(S(=O)(=O)Cc2ccccc2)s1)c1cc(-c2ccccc2)nc2ccccc12	14	27.0739	452.117	7.33772	27	9	4	3	0	286.025	1818	9.28632	6.04531	5.28014	5.50048	3.72554	4.27715	3.43555	34.9615	35.0357	25.8376	25.069	26.0194	24.0213	268.527	230.604	227.801	234.338	225.379	156.045	141.77	144.948	152.605	155.229	156.165	154.739	156.209	157.083	15.2222	15.8889	-16	60	25.8889	-75.1111	-38.4444	-29.4444	5.76331	-3.32692
3826	N#CC1C(=N)N2C(NC(=O)C3C(c4ccc(Cl)cc4)CSC32)C(C#N)C1c1ccc(Cl)cc1	7	26.1152	408.593	7.20664	12	9	5	1	2	255.153	2026	7.91643	4.13773	3.93424	4.90679	4.01606	3.37974	3.62346	38.9615	31.4286	23.396	22.8631	23.5391	26.3878	265.244	226.551	200.258	190.755	197.144	158.496	143.382	146.347	153.731	157.178	157.374	162.617	162.462	159.123	25.7809	-31.9405	-47.8163	-2.17576	42.7925	-9.58938	-44.834	-46.2568	9.3713	-5.1213
1285	C=CC1=C(C(=O)O)N2C(=O)[C@@H](NC(=O)/C(=N\OCC(=O)O)c3csc(N)n3)C2SC1	17.78	23.0292	1125.29	8.12441	5	14	5	7	0	390.396	1796	11.6198	7.24074	6.50754	8.67546	4.81787	5.5868	4.86832	39.9111	35.0426	29.0112	29.4167	27.6444	31.1975	248.164	229.731	205.614	196.538	200.877	163.811	151.067	154.147	159.788	159.183	162.023	163.837	163.916	161.68	44.0762	36.9932	-16.1591	-3.14683	-94.5871	-60.9119	22.4123	-0.801975	11.0084	1.62173
1885	COc1ccc(NC2=Nn3c(nnc3-c3cc(F)c(Cl)cc3Cl)SC2)cc1	15	21.3392	416.023	7.02399	17	10	5	1	3	184.792	1848	10.4014	5.81992	5.16794	4.73825	3.24527	2.97348	3.10339	47.3846	36.0714	34.4304	30.7375	33.8793	28.8103	276.603	253.341	218.401	227.328	245.105	163.163	148.891	153.59	159.684	162.473	164.51	162.219	157.429	160.663	51.9503	11.0334	-64.8412	-9.92584	28.1144	36.3429	-19.6736	-28.1557	7.68639	-1.39053
1015	O=c1oc2ccccc2cc1-c1nnc(Sc2nc(Oc3cccc4cccnc34)nc(N3CCN(c4ccccc4F)CC3)n2)o1	19	38.079	618.632	7.97507	37	14	8	4	1	343.059	2196	10.9778	7.78195	8.22222	4.90084	3.38313	3.33635	3.79433	31.3714	31.3377	24.5031	23.9455	27.188	28.8682	261.098	227.609	209.329	211.811	228.502	161.142	146.467	154.056	157.197	161.53	163.003	162.163	162.319	158.715	89.4419	63.3235	47.3702	-26.2512	-20.1981	14.8122	-0.133968	-81.1221	10.23	0.799388
2224	CCOC(=O)C1=C(C)N=c2s/c(=C\c3ccc(SC)cc3)c(=O)n2C1c1ccc(SC)cc1	13	25.4605	615.609	7.61653	17	8	2	3	0	232.316	1982	7.32164	3.38245	2.4412	4.07572	3.59507	2.91548	2.31101	34.7719	31.3	26.178	24.0448	21.3116	22.6058	250.177	244.324	211.307	208.249	199.292	156.293	141.154	149.135	148.659	151.293	154.756	154.639	156.079	155.578	93.1994	97.5451	8.89166	17.2887	17.5645	-67.0422	-111.018	-78.8218	20.4044	13.2299
2424	COc1ccc2nc(C)cc(-n3cc(CN4CCC(c5ccccc5)CC4)nn3)c2c1	12	24.6964	744.873	7.74462	21	6	5	1	0	154.722	1236	6.7931	2.78512	3.0102	2.66762	2.39422	2.2865	2.35686	21.3103	24.5161	16.766	14.5975	13.3058	15.0204	221.727	196.294	165.943	155.557	153.624	162.143	146.597	154.572	157.056	159.616	161.457	165.293	167.016	159.864	84.654	13.5969	-31.8264	22.3924	29.0737	-54.6813	-73.6825	-73.0809	13.343	-0.906361
3438	Nc1ccc(S(=O)(=O)Nc2nccs2)cc1	9	12.3864	79.6601	4.84777	11	7	3	2	0	171.108	1120	8.99556	2.71795	2.05	6.84434	5.02235	3.42474	2.32963	44.8	43.5769	30.1042	28.5	18.1154	14.95	257.907	214.392	190.841	212.067	184.308	160.988	147.56	150.998	155.759	162.949	162.195	159.886	161.032	162.807	-19.8567	16.6348	-10.2244	-12.1266	30.096	-27.1602	-56.4967	11.3413	1.8784	-4.0656
763	Cc1cc(SCc2nnc(-c3ccc([N+](=O)[O-])cc3)o2)nc(SCc2nnc(-c3ccc([N+](=O)[O-])cc3)o2)n1	21	30.7908	308.536	7.09282	28	16	8	6	0	401.951	2132	12.5616	7.94613	7.24242	7.30821	3.51511	4.28657	4.17831	38.7636	35.5593	29.7664	28.4261	29.2929	28.6364	266.848	242.839	218.5	240.855	207.777	161.677	148.98	151.238	155.946	161.838	161.434	155.815	161.532	161.477	85.978	80.7043	-138.913	-194.603	-69.1111	79.9504	254.182	-4.80808	5.43008	-5.55669
2222	N#CCN1CCN(c2ccccc2)CC1	13	11.2733	80.5378	4.79419	6	3	3	0	0	99.2778	594	5.73333	2.21875	2.72727	3.30926	2.33	2.125	2.86364	19.8	22.8387	13.6712	10.8974	10.1875	11.5909	209.28	169.042	126.017	126.336	133.121	164.301	147.858	159.895	162.138	159.717	166.913	167.59	165.196	164.076	21.36	-38.4	-39.12	-10.52	-3.12	-1	20.12	13.92	3.78778	-4.47222
2229	COc1cc(C2c3c(nc[nH]c3=O)Oc3[nH]c(=S)[nH]c(=O)c32)cc(OC)c1OC	13	22.5916	253.267	6.59916	18	11	4	6	0	248.764	1500	11.2099	6.48958	4.24242	5.52808	4.18553	3.82808	3.88016	33.3333	30.8125	29.0968	27.8636	21.2188	22.5152	244.201	261.723	214.368	198.646	169.424	162.355	149.817	157.376	150.368	154.998	157.045	160.827	165.61	161.791	71.3167	26.6702	-2.54008	-47.7281	-133.403	41.6789	276.866	-85.2474	17.7037	13.6173
1738	Cc1cccc2c1CC1Sc3nnc(-c4ccccc4)n3N=C21	15.6	18.9182	202.717	6.14472	17	5	4	0	0	104.892	1114	8.06607	4.57143	3.12245	2.83493	2.46644	2.66062	2.50983	30.1081	30.0488	24.7326	21.1279	21.2653	16.1633	260.23	234.032	191.1	208.652	234.57	157.39	143.905	147.262	151.375	156.958	163.003	159.801	152.162	152.529	54.7904	36.9724	-4.45475	-24.9833	-8.99919	-9.8828	-81.7791	-75.5298	10.6998	3.43535
3693	CC(=O)OCC1=C(C(=O)O)N2C(=O)[C@@H](NS(=O)(=O)c3ccc(/N=C4/SC(=O)CN4Cc4ccccc4)cc3)C2SC1	8	32.4089	6411.01	10.1768	12	15	4	8	0	470.779	2436	9.92821	5.00957	5.60847	7.24275	3.86944	4.1443	5.23416	37.4769	35.7246	26.1849	25.7485	23.8278	25.3333	250.033	223.089	208.607	206.822	192.65	159.773	144.588	152.49	154.136	159.221	158.81	156.475	159.465	158.508	34.9941	15.6923	-59.4852	-44.098	-37.9645	37.4339	1.35569	-16.9428	10.1193	-3.18769
1056	Cc1nc(N/N=C\c2cn(-c3ccccc3)nc2-c2cccs2)sc1/N=N/c1ccc(F)cc1	19	26.9271	1579.51	8.58864	27	10	7	0	1	223.09	1818	9.36325	5.17845	4.71261	4.2902	2.95406	2.85092	2.72294	34.9615	32.6429	25.0784	24.5714	25.5354	23.9327	265.341	221.307	236.84	232.278	228.329	160.932	147.015	150.454	159.878	163.126	159.439	155.274	154.563	158.708	53.3333	-4.33333	-41.4444	-44.2222	-35.1111	-38.6667	-9.22222	13.3333	8.41716	-2.39941
135	C=C1C(=O)[C@@]23CC[C@H](C(=C)C)[C@@](C)(CCC(=O)OC4CCCCC4)[C@@H]2CC[C@@H]1C3	30	22.9655	1862.15	8.5942	0	3	0	3	0	222.597	1166	4.44776	1.84409	1.77576	3.32235	2.14977	2.61365	2.81776	17.403	20.4	13.5869	11.0646	11.2366	10.8667	191.669	173.309	133.198	116.209	134.764	162.386	142.604	150.215	154.622	159.219	160.796	166.612	162.835	164.764	76.029	36.3965	-62.7051	-112.337	-20.3881	38.4057	-1.53286	-66.9893	21.1918	0.677879
2138	C[C@H](Nc1ncnc2c1cnn2C)c1ccccc1	14	14.9063	173.689	5.79912	15	5	5	0	0	101.139	764	7.47059	3.19298	2.8	2.97467	2.46569	2.53801	2.56296	22.4706	25.3889	18.5694	15.7532	14.2105	13.5111	223.884	200.003	159.141	161.059	164.385	164.855	150.563	159.137	159.704	163.212	162.805	165.36	166.102	163.473	52.7128	25.9135	-28.3391	-44.263	-29.09	-25.0588	-24.4498	-22.7855	9.47405	0.3391
364	O=C(O)CC(O)(CC(=O)O)C(=O)N1CCN(c2cc3c(cc2F)c(=O)c(C(=O)O)cn3C2CC2)CC1	24	28.295	863.198	8.04158	10	13	3	9	1	550.118	1656	10.8	3.65854	4.25954	9.16863	4.26329	4.41277	4.16412	27.6	27.5556	21.1645	21.0058	15.5793	15.6718	222.357	205.007	179.469	158.147	150.583	166.01	149.02	156.535	161.265	160.425	162.916	166.207	169.964	166.739	66.48	35.04	-62.48	-12.72	-45.36	11.56	-214.56	-38.64	12.57	-5.29
3738	COc1ccc(C2CC(c3ccccc3)=NN2c2nc(-c3ccccc3)cs2)cc1	7	23.8394	333.657	6.90872	23	5	3	1	0	143.142	1388	7.30283	4.9571	3.78761	2.80671	2.39231	2.69276	2.4909	27.2157	27.9455	20.4159	20.7009	21.9802	18.1239	250.663	216.813	196.706	209.509	232.332	156.463	142.33	147.902	153.549	154.58	157.839	155.969	151.336	151.994	49.9025	-12.2276	-49.0927	-24.286	27.5168	-2.16596	-28.2752	-43.0034	11.3383	-0.322568
1545	Nn1c(S)nnc1-c1ccccc1	16	9.99695	59.4357	4.34726	11	5	4	0	0	75.8881	748	8.44327	0.104167	0	3.61372	2.52593	1.7284	1.20782	35.619	30.6364	25.641	18.5789	11.125	4.33333	247.945	214.172	183.884	156.297	106.828	164.095	153.778	154.887	158.152	166.72	167.154	164.787	166.801	172.279	28.178	8.94835	-18.4023	-45.1823	-33.5715	-19.2151	14.7744	20.5224	5.5102	-1.73469
3611	Nc1ccc(C2=N/C(=N/N=C(/C[n+]3c(-c4ccc(Cl)cc4)cc(C(=O)O)c4ccccc43)c3ccccc3)SC2)cc1	8	33.3481	1753.1	8.90423	28	9	5	2	1	270.62	2131	8.06044	5.23138	4.7	4.0391	3.14884	3.25392	2.93671	31.806	29.4028	22.5667	21.1543	23.0549	21.7105	261.243	233.281	214.736	224.095	227.696	156.862	143.61	145.998	152.354	155.108	156.261	154.943	154.927	154.366	52.6942	1.58414	-49.5353	-16.9958	63.6328	-25.0623	-120.241	-21.1999	12.8476	-3.6037
510	O=C1C(Cl)C(c2cc3ccccc3nc2Cl)N1c1ccc(Cl)cc1	23	19.2059	211.066	6.22764	16	6	2	1	3	137.433	1688	8.53757	4.2714	3.86445	3.92664	3.16352	2.74857	2.87192	48.2286	33.6316	29.25	27.7848	29.4426	30	290.862	248.979	243.631	242.71	230.008	155.109	141.483	146.361	153.026	155.494	154.22	154.245	156.839	156.22	24.8356	-9.35407	-27.6593	-29.7378	-9.36543	-8.55704	5.78222	-13.4188	5.20408	-4.16327
2590	CCN1CCN(Cc2cn(-c3cc(C)nc4ccc(OC)cc34)nn2)CC1	12	21.2013	419.493	7.0323	15	7	6	1	0	139.417	1104	6.67925	2.94	2.47674	2.6305	2.5306	2.39333	2.34981	20.8302	24.1429	16.8293	14.2535	14.1	14.6977	206.694	189.804	150.492	157.097	156.158	165.974	150.223	161.594	161.533	161.189	166.55	167.879	168.135	160.709	95.1791	25.7173	-18.7526	67.4884	71.8405	-44.4724	-74.811	-97.6906	14.8234	2.93806
572	CC(O)(Cc1cn(CC(=O)c2ccc(F)cc2)nn1)c1ccc(S(=O)(=O)c2ccccc2)cc1	22	26.7921	672.586	7.73491	23	9	3	4	1	376.612	1662	9.29365	4.84591	4.39744	6.72521	3.13704	4.02449	3.98834	29.6786	31.4576	22.1667	18.5338	19.5755	18.2212	243.591	215.132	180.112	177.019	191.645	161.151	144.109	149.174	154.475	160.172	161.141	162.961	160.321	161.714	27.3202	-1.18098	-75.2863	-28.6542	0.65292	8.49532	-17.7038	-63.1712	8.10204	-14.6327
1467	CSc1ccc(OCc2nnc3n2N=C(c2ccc(Cl)cc2Cl)CS3)cc1	16	21.2702	436.78	7.07268	17	9	4	1	2	120.434	2012	8.24631	5.23704	4.52778	2.93742	2.62651	2.95359	2.60843	49.0732	36.7273	32.3659	29.8795	33.4923	29.4643	279.259	252.257	200.833	218.622	234.343	157.379	144.358	149.379	154.238	156.833	158.485	159.605	161.455	155.943	59.0788	29.9229	-54.1469	-31.8539	56.1295	28.361	-63.7187	-41.4669	8.04105	-1.28316
1651	COCCn1c(S)nnc1-c1cnc2c(C(F)(F)F)cccc2c1N1CC(C)OC(C)C1	16	25.1685	340.959	6.99491	15	11	5	2	3	338.617	1652	9.73765	4.22418	3.76529	6.04674	2.96766	3.10897	3.51291	29.5	27.9492	22.0154	20.6447	19.7235	17.5618	221.734	209.956	198.492	181.635	185.74	170.461	150.133	163.697	160.137	164.877	160.711	166.041	162.467	172.007	109.075	107.746	15.213	67.5941	31.2703	-66.4702	-161.375	-94.0455	15.7385	13.9911
1371	CCN(CC)c1cccc(OCc2cc(=O)oc3ccc4ccccc4c23)c1	17	21.8275	668.826	7.53514	20	4	1	3	0	181.472	1128	7.33333	3.86275	4.11111	3.55828	2.52991	2.80556	2.85679	22.1176	24.6667	18.4615	17.3952	15.098	16.0333	230.82	211.566	169.355	157.181	175.07	158.113	142.514	150.82	154.524	151.004	157.047	160.474	158.604	156.398	77.3356	52.4498	-1.08651	-18.1073	29.9654	26.0346	10	11.2457	14.3333	7.55556
4188	O=c1ccc2cc(O)c3oc4ccccc4c4ccc1c2c34	3	18.2396	147.166	5.78002	20	3	0	3	0	171.028	886	10.5625	3.89362	2.5	5.34462	3.74786	3.8617	3.22222	27.6875	29.0556	25.1013	23.0864	14.8723	11.8333	281.463	270.084	229.268	191.023	169.224	150.457	137.948	138.873	145.125	147.021	148.548	154.357	157.6	160.252	23.9375	14.7969	6.48438	-52.8594	-51.8125	-30.9844	5.48438	0.84375	9.20312	3.23047
3765	N=C(N)c1ccc(-c2ccc(-c3ccco3)o2)nc1	7	14.9467	114.622	5.3835	16	5	3	2	0	134.167	790	9.66667	6.53125	4.15152	4.47222	2.75068	4.05903	3.57912	26.3333	28.0312	21.2281	20.6182	22.2812	17.3636	247.796	214.067	181.719	183.685	214.639	160.461	147.945	149.03	157.382	159.678	161.08	156.839	157.862	160.837	25.32	0.84	-39.88	-29	-20.96	32.96	-5.08	-59.32	6.20889	-3.93222
4021	Clc1ccc(C2=NN(c3ccccc3)C(c3cn(-c4ccccc4)nc3-c3ccc(Br)cc3)C2)c(Cl)c1	5	29.7031	441.678	7.39891	29	7	4	0	3	155.561	3100	7.52202	4.71946	3.99259	2.68209	2.48653	2.53867	2.4899	53.4483	31.8413	25.4015	25.8696	24.8046	23.7405	276.601	231.943	226.796	234.722	231.711	155.309	142.471	145.98	154.19	156.53	156.535	151.835	152.517	153.445	48.6117	-4.9652	-22.6777	-22.1516	-11.9259	-12.6668	-40.2568	-72.6924	9.30054	-2.27646
4306	O=C(Cc1ccccc1)NCC(=O)N1O[C@H](C(=O)O)C[C@@H]1C(=O)O	0	18.1722	590.987	7.25726	6	9	2	7	0	350.694	1102	10.65	4.73846	5.82456	8.76736	7.2241	4.40897	5.32749	27.55	27.5366	19.4624	19.5889	17.1538	18.9474	221.286	179.52	164.075	163.137	163.192	164.531	149.583	154.747	163.833	163.835	166.091	168.687	165.761	163.845	32.76	-8.56	-71.72	-2.2	35.84	34.84	-47.2	17.12	3.7225	-6.6475
536	CC1(C)CC(=O)C2=C(C1)Nc1nc(N)[nH]c(=O)c1C2c1ccc([N+](=O)[O-])cc1	23	22.4616	267.257	6.61783	12	9	5	4	0	327.118	1204	9.65957	3.7619	4.27451	6.95996	3.87695	3.3491	3.73312	25.617	26.92	20.5164	16.9299	15.2063	16.8333	228.075	220.004	199.879	195.142	162.534	164.267	150.166	151.768	153.631	163.154	160.629	158.298	165.918	162.659	69.8551	58.1195	21.1657	112.405	-177.53	-66.8144	-107.488	41.4151	12.038	-1.73563
1504	N#Cc1c(-c2ccccc2)nc(=S)[nH]c1N1CCCCC1	16	16.2111	142.421	5.70073	12	5	4	0	0	124.319	1044	6.82282	1.81095	0.872727	3.35998	3.07577	2.75345	2.10404	28.2162	26.4872	17.9355	19.2	16.209	10.1273	239.017	191.026	211.166	198.986	174.315	160.532	146.039	153.055	158.69	161.151	156.536	158.629	159.388	160.072	45.8614	39.6952	73.1035	41.6808	-51.0597	-144.879	-114.344	-42.8032	7.10226	4.26077
1669	Cc1c(-c2nnc(-c3ccc([N+](=O)[O-])cc3)o2)sc2ncnc(N3CCOCC3)c12	16	24.0463	469.244	7.24974	20	11	6	4	0	254.698	1506	10.9662	6.02174	5.61712	5.53691	2.99201	3.43569	3.44278	32.7391	32.02	26.18	24.1101	22.0978	20.3649	249.269	231.275	205.375	208.516	185.377	162.703	148.845	156.132	156.005	158.958	164.047	157.012	162.233	161.733	71.3239	44.368	-6.50683	-66.8433	-132.966	21.4531	143.527	-6.94539	11.4253	4.96219
3354	Cc1ccc(C2=CC(c3c(-c4ccccc4)[nH]c4ccccc34)C(C#N)=C(N)O2)cc1	9	24.644	362	7.02305	21	4	3	1	0	187.306	1204	7.65385	4.19608	3.31206	3.60203	3.13361	3.15069	3.05595	23.1538	25.6607	19.9256	18.5896	16.9412	14.773	250.655	232.121	218.903	225.607	199.487	156.267	142.634	144.239	149.088	153.622	153.456	150.961	154.773	158.792	51.8698	21.1598	-19.4379	-2.05325	29.5089	4.22485	-93.7101	-94.0888	14.75	2.5
1558	N#CCCCSc1nnc(-c2cccc(-c3cccc(Cl)c3)c2)o1	16	18.4133	398.208	6.86244	17	6	3	1	1	144.148	1418	8.10656	5.2202	4.27664	3.79336	2.97479	3.32978	2.92404	37.3158	31.525	22.725	22.1184	24.8	24.7347	265.936	217.279	220.977	221.965	216.888	156.995	142.186	146.329	152.572	156.781	157.327	156.086	157.891	157.547	43.9903	31.908	11.9956	-47.627	-77.7793	-41.4183	-15.4036	-11.8833	4.2964	0.396122
1192	N#Cc1c(-c2ccccc2)cc(-c2ccc(Nc3cc(=O)oc4ccccc34)cc2)nc1N	18	26.1391	275.251	6.81161	28	6	4	2	0	243.306	1314	9.29412	4.23684	4.02062	4.7707	3.46312	3.30312	2.94273	25.7647	27.5455	21.5739	20.2667	16.4123	14.8763	262.755	238.519	217.966	210.403	190.454	156.232	143.309	144.431	151.591	153.434	153.971	154.759	157.683	158.794	40.7132	13.0265	-19.5694	-22.6044	-60.0223	-62.6405	-55.9389	14.5252	10.0754	-2.12572
593	O=C1/C(=N\N2C(=S)NNC2CCc2ccccc2)c2ccccc2N1CN1CCOCC1	22	25.3915	877.306	7.94001	12	9	6	2	0	192.625	1532	7.21456	3.51577	2.85747	3.32112	3.08655	2.87669	2.37822	26.4138	26.4839	18.6	16.245	18.9122	16.0828	224.802	185.859	182.159	203.715	187.01	163.272	149.657	157.999	160.973	163.123	162.957	159.32	160.547	163.911	60.2593	-1.47523	13.5862	34.9925	26.2567	-105.827	-170.473	-55.931	10.9025	0.491082
402	COc1cc(/C=C/C(=O)C2=C(/C=C/c3ccc(O)c(OC)c3)NC(=O)NC2c2ccccc2O)ccc1O	24	29.2552	713.767	7.90556	18	9	2	7	0	368.111	1616	9.0625	5.24051	5.3758	5.75174	4.24588	3.66297	3.59306	25.25	26.4478	21.6449	19.0892	18.2722	18.5605	235.805	226.146	189.363	194.23	194.977	159.461	145.543	149.568	151.571	155.314	158.293	157.595	157.127	157.158	49.7061	-12.0674	-63.6777	-71.0498	-15.0234	37.0957	10.5293	10.5127	15.918	-2.61328
1843	O=C1CSSCC(=O)Nc2cccc(n2)NC(=O)CSSCC(=O)Nc2cccc(n2)N1	15	24.4792	225.386	6.58097	12	14	6	4	0	313.903	2240	9.15556	4.40476	4.64198	6.27805	3.7036	3.96996	3.70616	44.8	41.0769	29.7308	30.2157	29.2321	27.8889	257.907	215.193	213.874	207.168	206.454	160.988	148.353	152.653	161.583	157.225	158.482	159.082	159.041	157.794	62.7044	26.854	-144.218	6.25991	-84.8427	-79.9118	15.0172	38.8352	0.6368	-6.7744
2836	Cc1cc(C)n(CC(=O)c2ccccc2F)n1	11	13.0442	80.9257	4.92416	11	4	2	1	1	183.139	724	8.86667	3.72973	1	6.10463	3.35744	3.9009	3.14414	24.1333	25.3871	19.5667	16.9524	18.1351	11.1622	226.329	200.946	163.76	152.499	198.893	165.458	147.222	155.819	162.503	164.734	165.279	168.896	158.423	164.429	53.8044	11.7644	-71.0667	-18.7867	30.7111	21.3689	-67.7022	-77.7689	7.33444	-1.94222
1929	Cc1ccc(NS(=O)(=O)Cc2nnc(CS(=O)(=O)c3c[nH]cc3S(=O)(=O)c3ccc(C)cc3)n2N)cc1	15	29.2598	1092.19	8.30428	22	15	6	6	0	443.537	2262	9.20219	4.53383	5.97067	7.2711	4.0496	4.09151	5.70957	37.082	40.375	28.7482	27.5	25.4962	22.864	239.54	219.715	188.928	199.248	191.276	162.781	147.04	152.555	155.886	162.134	163.813	161.275	164.403	164.117	-3.76637	74.4371	-117.481	60.7489	173.845	-67.4171	-156.967	19.5943	10.5235	-5.94652
2176	NC1=C(Br)C(=O)c2ccccc2C1=O	14	10.8015	59.4572	4.42173	6	4	1	2	1	153.8	1768	10.6534	0	0	7.69002	2.97454	1.6331	1	88.4	37.2381	45.0476	38.3	7.25	1	290.059	270.597	189.567	140.694	73.5801	154.958	143.137	142.364	149.141	155.215	161.594	167.013	175.526	184.918	14.6947	16.0482	-0.221015	-46.986	-58.7639	-7.57443	28.8191	13.1376	6.04	-1.68
404	N#Cc1ccc(Nc2nc(Oc3ncnc4ccccc34)nc(N3CCN(c4ccccc4Cl)CC3)n2)cc1C(F)(F)F	24	34.223	394.589	7.43646	28	14	9	1	4	417.679	2102	11.4313	8.08354	7.89226	6.52623	3.4877	4.01477	3.68417	32.8438	30.6232	24.2297	23.2785	23.7669	25.5985	255.876	225.963	198.318	197.93	212.28	167.59	149.669	160.866	159.409	165.021	168.816	168.074	168.273	161.436	75.4975	103.867	34.589	2.46506	7.0824	-51.6974	34.0642	-31.7743	6.64771	-0.540283
3429	O=C1N/C(=N\c2cccc(Cl)c2)S/C1=C\c1ccccc1	9	16.4418	153.699	5.77693	12	5	2	1	1	134.148	1294	8.25154	4.84596	4.02941	4.19211	3.57701	3.66578	3.28595	40.4375	32.8529	24.9385	25.8393	22.4773	22.3529	278.811	223.929	244.828	236.796	209.941	154.57	141.709	144.486	152.726	155.753	152.181	152.924	158.26	157.441	12.301	-18.5063	-5.40466	12.0698	26.975	-20.4672	-39.5095	-36.2677	1.7207	-3.02637
1226	COc1cc(/C=C/C(CC(/C=C/c2ccc(O)c(OC)c2)=N/c2ccc(S(N)(=O)=O)cc2)=N\c2ccc(S(N)(=O)=O)cc2)ccc1O	18	36.3235	436.798	7.62703	24	14	4	8	0	490.293	2440	8.79606	4.9193	5.22896	6.20625	3.01485	2.83153	3.23282	30.8861	33.3659	22.5904	18.6758	19.0632	21.6616	238.844	221.474	182.372	190.683	203.646	160.061	144.793	150.159	153.626	156.367	158.25	157.075	156.224	151.627	13.2432	43.4621	-137.264	-142.406	-59.7155	107.283	95.6966	-24.0966	12.2237	-12.9934
4251	O=C(NO)OC[C@H]1CN(c2ccc(N3CCSCC3)c(F)c2)C(=O)O1	0	19.2583	276.297	6.53777	6	10	3	5	1	296.337	1362	9.8708	5.45641	5.58025	6.89155	4.39733	4.01092	4.63717	31.6744	30.1111	20.2178	18.451	19.5077	22.8519	220.883	187.3	167.498	156.839	163.23	167.495	150.974	159.352	162.349	162.41	165.656	170.604	170.305	163.543	58.0632	53.3487	-7.39066	-67.5413	-24.5014	24.8007	33.4622	-46.0338	6.42131	-1.53272
2081	CCCCc1nc(Cl)c(-c2cc(-c3ccco3)nc3c2C(=O)c2ccccc2-3)n1Cc1ccccc1	14	28.7653	683.986	7.80887	28	6	3	2	1	207.394	1668	7.89342	4.71012	3.44387	3.45657	2.99651	2.86215	2.72438	27.8	27.1385	21.0851	21.8912	22.3966	18.7202	251.97	220.333	234.051	248.08	225.182	156.911	142.007	148.231	154.32	155.464	154.892	151.509	151.765	154.946	87.0976	91.3606	93.9454	64.7313	41.1203	-39.0705	-108.503	-160.434	17.6389	16.4433
3597	Nc1ncc(Sc2nc3ccc(Cl)cc3c(=O)n2-c2ccccc2)s1	8	19.925	213.444	6.27967	21	8	4	1	1	158.873	1684	9.18038	5.07202	3.34429	4.41315	3.32777	3.19336	2.92422	46.7778	36.9744	31.2703	33.8592	30.1806	22	289.691	258.225	268.816	280.619	249.447	155.634	144.199	146.643	151.582	153.787	153.215	146.282	149.891	154.885	18.9494	7.58829	25.2234	-22.2945	-16.7902	-68.8011	-44.0837	-22.6903	6.28009	2.26003
3242	CSc1ccc(Cc2nnc3sc(-c4ccc(-c5cc(Cl)c(Cl)cc5Cl)o4)nn23)cc1	10	24.8343	419.533	7.17054	25	10	4	1	3	131.328	2408	8.90236	5.8015	5.49484	2.98473	2.77228	2.65171	2.50738	54.7273	38.6667	36.9101	32.0989	38.0781	37.1803	299.842	270.056	228.087	244.901	264.672	154.913	142.746	146.379	151.07	153.664	157.582	157.617	153.347	154.211	58.2204	31.9692	-27.8728	19.3401	55.0814	-12.877	-26.0782	3.20011	8.43802	-2.6064
1933	NC(=O)n1c(/C=C/c2ccccc2)nc2sc3c(c2c1=O)CCCC3	15	19.8441	494.126	7.11908	15	6	3	2	0	203.642	1232	8.0582	4.26667	3.13924	4.84863	3.50388	3.56815	3.53235	29.3333	28.7111	21.5941	23.0306	20.92	17.2911	246.065	213.55	198.386	210.575	210.9	158.682	144.364	148.649	154.507	155.51	159.444	159.929	155.149	158.946	50.1444	62.4903	69.9945	52.1358	-77.9879	-128.172	-104.883	-81.4381	10.3963	7.28175
3055	Cc1nc(-c2cc(-c3ccc(Cl)cc3)n(-c3ccc(F)cc3)n2)sc1C(=O)NNC(=O)NC(=O)c1ccc(C(F)(F)F)cc1	10	34.7295	4208.75	9.82652	28	15	6	3	5	561.432	2418	12.477	7.7538	6.30365	8.91162	3.98496	5.3752	3.77043	38.381	33.1194	28.3008	25.8571	27.964	25.1679	266.517	239.449	223.586	235.437	223.483	166.73	149.042	155.552	158.796	163.792	162.799	157.585	162.325	160.13	58.7961	56.543	-86.5774	-92.9919	-85.341	-21.8829	106.171	-40.721	5.88385	-6.56463
2531	CC(=O)N1N=C(c2ccc(Nc3cc(=O)oc4ccccc34)cc2)CC1c1ccccc1Br	12	26.3174	381.226	7.13731	22	7	3	3	1	238.439	2520	8.77485	3.79962	3.3826	4.49886	3.11499	3.17672	2.60797	47.5472	30.1404	24.8548	24.5703	20.0256	17.7736	258.786	226.799	202.853	200.364	194.684	157.069	143.501	147.793	155.147	154.735	156.345	155.761	155.332	158.226	61.0666	10.426	-77.7695	-37.5545	-21.3859	-24.253	-67.4934	23.3301	10.1862	-2.18654
4410	CCOc1ccc(NC(=O)c2ccccc2NC(=S)Nc2ccc(C(=O)NCC(=O)O)cc2)cc1	0	26.5886	527.025	7.52001	18	10	4	5	0	330.208	1696	8.6516	4.68986	4.3631	5.59675	3.17028	3.34635	3.19568	28.7458	27.2459	20.252	20.7381	19.0087	20.0268	237.049	202.229	195.972	191.444	196.729	160.804	147.878	151.823	158.209	158.687	158.527	157.795	157.665	157.655	50.0375	1.10517	-69.0469	-64.6786	24.6904	25.5306	-14.0798	-16.314	7.65355	-4.1626
606	NC1NNC2NC3NC4CCCCC4C(c4ccccc4)C3C(=O)N12	22	20.3609	203.595	6.23243	6	7	6	1	0	167	1032	5.68627	1.67702	1.02326	3.27451	2.40581	2.31677	2.11693	20.2353	23.4727	14.8704	14.2022	11.0186	8.58915	198.191	168.319	156.099	150.145	131.484	167.511	152.818	157.536	162.994	164.714	163.855	165.22	167.867	171.894	34.321	22.2261	6.03114	21.4721	-40.5248	-69.5548	-93.5932	-52.2399	11.3218	3.07958
968	O=c1c2cc(Br)cc(Br)c2nc(-c2ccccc2)n1/N=C/C=C/c1ccccc1	19	22.7129	1182.37	8.13999	22	6	3	1	2	170.49	3504	8.50306	4.45414	4.03481	3.87477	3.39064	2.94816	2.67492	79.6364	35	32.0521	44.2637	29.9167	29.4096	285.461	241.092	243.001	241.706	234.248	154.28	141.745	145.351	152.877	157.443	156.496	153.879	152.216	151.508	33.5182	18.0686	62.2059	23.3322	-49.1317	-101.967	-68.5896	-8.78755	6.80733	0.936983
1947	c1ccc(-c2nnc3n2N=C2c4ccccc4CC2S3)cc1	14.6	18.1421	188.085	6.02535	17	5	4	0	0	100.115	1076	8.54248	4.7907	3.2093	2.94455	2.66916	2.7037	2.45693	31.6471	31.1579	24.95	22.3649	21.814	16	268.907	230.354	211.391	229.902	240.605	156.671	143.87	146.045	152.628	158.647	163.204	156.971	150.325	150.743	38.3057	23.1126	11.832	-20.8389	-31.9016	-41.3664	-64.6767	-50.7486	7.05536	2.00346
4456	O=C1CC(CBr)N1OS(=O)(=O)c1ccc2ccccc2c1	0	16.5078	128.551	5.59826	10	7	1	4	1	221.878	2302	9.50035	4.44686	2.92761	6.72357	4.68198	3.86775	2.73941	69.7576	41.5429	30.4384	30.8472	26.4783	23.9773	263.979	220.532	216.02	210.533	205.298	157.396	141.832	149.233	155.266	156.901	157.469	158.237	156.503	159.456	5.0817	51.5579	8.36772	-39.0257	20.8128	-93.6682	-53.3718	-15.6076	3.7236	-4.29017
458	CCC1SCCC(=O)N1CCCNc1ccnc2cc(Cl)ccc12	23.06	18.4418	331.246	6.67833	10	6	3	1	1	145.648	1426	5.69673	1.99164	3.07253	3.16625	2.02035	1.89271	2.2049	31	27.2708	18.9386	17.5664	12.1828	16.9167	225.092	185.615	152.827	127.106	133.485	161.851	145.696	153.895	160.11	159.626	159.522	165.462	167.159	164.288	54.297	36.059	-11.192	-99.3507	-50.8631	24.5883	57.3375	30.2282	9.00189	1.60302
2953	CCCC1(c2ccccc2)OC(c2cc3ccccc3o2)=C(C#N)C1c1ccccc1	10	24.4233	342.214	6.96684	21	3	1	2	0	181.035	1208	7.2963	3.06593	2.33939	3.35249	2.98014	2.84707	2.54747	22.3704	25.0345	18.709	19.0822	14.6538	12.2061	245.361	215.956	220.924	204.329	183.015	155.287	139.701	144.217	151.266	151.783	150.368	152.387	155.17	158.507	67.7462	64.8025	64.5542	19.6077	-59.9657	-117.458	-132.454	-89.2551	16.8642	11.8611
2187	Clc1ccc(-c2nn(-c3ccccc3)cc2-c2nnc(-c3ccccc3)o2)cc1	13.6	23.2417	301.898	6.7748	28	6	4	1	1	142.283	1392	9.08193	6.15873	4.78277	3.23371	3.19308	3.16684	2.86644	31.6364	29.6667	22.6489	22.6196	24.7738	21.8876	270.472	229.03	233.23	248.09	244.572	156.559	143.887	146.67	153.517	160.245	158.936	153.952	153.298	155.385	44.0244	29.9267	37.2188	20.2001	-19.2028	-69.0741	-94.0407	-96.0454	6.96488	-0.849174
1670	CSc1ccc(OCc2nnc3n2N=C(c2ccc(Cl)cc2)CS3)cc1	16	20.4942	401.343	6.95033	17	8	4	1	1	120.845	1724	8.06083	5.00114	4.37302	2.94745	2.64523	2.94191	2.5844	42.0488	34.5455	28.6585	22.747	28.5692	26.6071	267.725	238.405	189.295	208.976	220.902	157.788	144.52	149.576	154.602	157.316	158.984	159.802	161.846	156.403	59.2223	28.0346	-53.6266	-26.0623	54.7242	20.4799	-65.5628	-42.2184	7.99822	-2.31112
4064	CC(C)(C)C(=O)Nc1nnc(-c2ccc(NCc3ccc(F)cc3F)c([N+](=O)[O-])c2)s1	4	24.1349	300.46	6.83672	17	11	5	3	2	407.51	1594	10.7689	7.43775	7.26496	8.15021	4.32202	4.79195	6.00839	31.88	30.1346	23.027	18.9627	23.9036	23.9487	237.551	211.036	194.929	211.539	214.455	167.526	150.238	154.36	157.703	172.201	164.033	163.809	162.964	162.461	80.9232	51.1036	-13.9113	43.8233	18.3972	-63.9227	-50.3961	-21.6352	9.28	-11.57
3583	CC(/C=C/c1ccccc1)=N\NC(=O)c1ccncc1	8	15.0276	135.877	5.60489	12	4	3	1	0	147.361	802	7.6	3.16981	2.82143	4.21032	3.28419	2.75052	2.57738	22.9143	24.8889	17.4559	15.1515	14.6226	12.3393	233.967	195.216	165.754	187.171	178.35	160.618	146.18	151.339	157.125	161.652	164.926	159.901	157.118	161.403	31	-15	-32	-5	17	-57	-14	34	3.9951	-5.84571
3810	Cc1cccc2sc(Nc3ncccc3C(=O)N3CCNC(Cl)C3Cl)nc12	7	21.3677	188.008	6.22974	15	9	5	1	2	160.042	1808	7.67396	4.21717	3.42731	3.63731	2.85838	2.60756	2.55132	41.0909	32.2128	28.4902	25.4175	24	25.075	254.305	221.638	208.902	218.195	203.775	161.618	147.791	155.706	158.43	161.463	158.894	161.325	160.915	159.163	46.9109	20.263	10.7231	-33.7858	-22.0982	-38.114	-1.38272	-46.7039	8.9375	0.3125
51	O=c1c(Cc2ccc(Cl)cc2)nnc2scc(-c3ccc(Cl)cc3)n12	33	19.925	295.469	6.60485	21	7	3	1	2	146.514	1704	9.04595	5.41347	3.96065	4.06983	3.63612	3.31552	2.67623	47.3333	35.4103	28.8354	25.9873	33.6	33.1458	292.119	250.03	229.465	236.504	249.254	154.978	142.258	145.518	151.996	157.001	155.439	156.924	156.839	151.726	29.8602	1.47908	3.76501	4.18408	4.6371	-62.0997	-71.8868	-36.9076	4.55787	-4.42361
350	CC1(c2ccc(O)cc2)NNC(=O)CO1	24.4	11.6298	71.7639	4.67885	6	5	2	3	0	153.896	662	8.66667	3.28	3.38462	5.69985	3.61822	4.60444	4.74359	24.5185	25.8929	19.3443	13.6308	13.64	11.7692	212.74	188.801	127.66	128.414	123.886	165.4	151.845	156.541	161.627	163.105	167.001	167.999	172.277	178.696	27.1907	-12.4088	-82.332	-38.2359	53.7531	17.0137	-28.2332	-7.92867	5.10014	-7.29355
1580	Cc1ccc(C2=NN(c3nc(-c4ccccc4)cs3)C(c3ccc(C)cc3)C2)cc1	16	24.0582	316.544	6.85608	23	4	3	0	0	135.67	1362	6.49895	4.04242	3.06614	2.55981	2.40048	2.52144	2.27077	25.6981	26.7544	19.425	18.3969	20.2909	15.8333	246.285	214.811	191.808	222.221	224.312	156.43	141.777	147.338	152.018	156.36	159.011	153.106	152.418	154.429	62.0402	6.18255	-43.3541	18.855	37.4097	-23.4617	-50.8948	-65.7299	12.5657	-2.74439
805	Cc1c(-n2c(Cc3ccc(Cl)cc3)nn(Cc3nnc(Nc4ccc(F)cc4)s3)c2=O)c(=O)n(-c2ccccc2)n1C	20	33.486	2201.87	9.13215	33	13	8	2	2	335.314	2214	9.57651	5.20143	5.11683	5.08052	3.42254	3.3311	3.24413	33.5455	30.8169	24.5586	22.5404	21.9942	22.4629	252.804	226.291	211.677	211.041	202.727	162.953	148.869	155.066	160.014	160.909	162.97	160.928	160.639	161.431	94.5898	35.5972	-43.4432	-61.1709	6.71998	-123.733	-63.5316	24.3756	15.7401	1.12764
3609	Cc1nc(N)sc1Sc1nc2ccc(Cl)cc2c(=O)n1-c1ccccc1	8	20.701	208.378	6.29486	21	8	4	1	1	163.651	1722	8.67933	4.89118	2.98191	4.19618	3.08952	3.15953	3.024	44.1538	35.4762	31.7875	32.2875	29.4691	20.8488	279.861	259.446	263.85	258.685	252.452	156.396	144.21	147.747	152.432	152.04	153.235	152.117	148.557	153.363	37.9577	22.6883	1.04774	-2.19126	-20.335	-56.0413	-73.791	-91.5482	9.78895	4.31229
1117	CSc1ccc(Cc2nn3c(Cc4ccc(SC)cc4)nnc3s2)cc1	18	20.4252	390.595	6.92318	20	7	4	0	0	114.205	1666	6.71212	4.23297	2.97884	2.59556	2.43185	2.42195	2.18372	37.8636	33.3617	25.0805	19.0417	28.5484	24.381	258.407	234.361	179.422	206.161	227.659	156.922	143.098	148.151	150.095	154.838	161.057	160.583	154.154	156.004	65.0083	40.9421	-36.5785	-13.4325	46.8044	-1.03581	-27.1423	-27.7052	10.9504	-0.289256
961	Fc1cccc(-c2nc3ccccc3c3oc(NCc4ccccc4)nc23)c1	19	22.5346	565.334	7.36704	25	5	3	1	1	195.75	1136	9.45455	5.72941	4.25	4.44886	3.52484	3.45163	2.98611	25.8182	27.6458	20.8889	20.3711	20	16.7857	258.218	221.936	223.31	228.642	216.688	159.038	143.658	148.157	155.4	159.71	158.693	157.102	156.689	156.022	41.8926	28.1322	24.5455	11.9174	-14.0909	-88.2149	-71.0331	-26.9835	7.40496	2.57851
3833	Nc1ccc(Nc2cccc(Cl)c2)c2c(=O)[nH]cnc12	6.5	15.7228	156.503	5.74623	16	6	4	1	1	146.755	1064	8.955	4.21111	3.07508	4.73404	3.22497	3.14267	3.3489	34.3226	29.7576	24.2388	22.5075	21.34	25.5946	256.928	229.661	201.247	193.84	191.021	161.541	150.173	150.373	156.565	161.774	160.261	161.123	161.951	164.23	18.4069	3.53562	-1.0649	-7.95578	-39.1548	-33.1103	-3.25077	-34.9148	5.81165	-1.31634
672	Cc1cc(SCc2nc3ccccc3o2)nc(SCc2nc3ccccc3o2)n1	22	23.363	199.416	6.36011	24	8	4	2	0	146.84	1608	9.04198	5.51515	5.1401	3.26312	2.47519	2.64598	3.13187	35.7333	33.0612	27.4719	27.3529	24.2987	25.1449	266.462	231.317	222.976	217.674	203.978	156.709	142.75	148.843	155.984	155.891	153.733	152.553	158.298	159.539	69.7105	38.7064	-139.703	-122.947	12.981	116.396	105.037	-141.391	6.79309	1.88395
4022	CCOc1ccc(-n2c(S)nnc2Sc2nnc(-c3ccccc3)n2-c2ccccc2)cc1	5	25.9893	426.137	7.24868	28	9	6	1	0	162.697	1754	8.41044	5.59225	4.83636	3.06976	2.77016	2.91227	2.8293	33.0943	30.7368	25.9099	27.7727	25.0183	22.4545	257.659	229.616	231.853	223.544	224.064	158.66	145.646	150.675	155.441	155.836	157.161	155.861	157.929	157.603	76.0073	31.5454	-14.172	-3.4148	32.0459	27.4262	-36.2218	-122.064	13.8277	9.34425
329	CN(/N=C/c1c(O)ccc2ccccc12)S(=O)(=O)c1ccccc1	25	18.6769	157.563	5.93529	16	6	2	3	0	228.994	1210	8.41111	4.80822	4.15278	5.72485	3.20618	4.35654	3.67991	30.25	33.119	24.1609	19.9355	20.9178	17.7222	246.331	227.299	179.13	182.992	192.743	158.179	142.991	149.406	152.228	157.613	161.851	161.169	157.516	156.56	1.97722	26.5478	19.4286	-78.5897	-42.1264	-39.66	40.9436	14.8022	9.38	-4.58
2993	Cc1ccc2[nH]c(-c3ccccc3)c(-c3[nH]c(=S)[nH]c(=S)c3C#N)c2c1	10	20.5512	211.589	6.31016	21	6	4	0	0	142.139	1442	8.07222	3.24843	1.80797	3.55346	3.10892	2.82605	2.6868	36.05	30.0698	25.2889	26.2474	21.7547	19.2065	276.808	253.864	249.189	250.374	211.954	154.609	144.002	144.982	147.562	152.742	151.217	150.09	153.506	156.292	37.4842	13.3139	16.0472	27.0492	-17.4403	-91.7222	-87.0206	-55.2022	10.52	3.4
1083	C/C(=N\NC(=S)Nc1ccc(C(=O)NCC(=O)O)cc1)c1ccc(Br)cc1	19	20.3744	196.603	6.27444	12	9	4	3	1	242.036	2534	8.53436	4.22759	4.33951	5.50083	3.03071	3.32996	3.3517	57.5909	31.8667	25.7111	22.0667	24.8841	26.05	251.69	212.078	183.463	185.999	196.19	160.775	148.896	152.213	157.587	160.691	161.604	161.536	160.159	156.393	33.3851	-18.0895	-81.203	-56.9032	54.4906	27.8751	-15.8555	-25.188	4.20713	-9.15754
3937	N#Cc1c(-c2ccccc2)csc1NC(=O)c1ccc(-c2ccccc2)[nH]c1=O	5.3	22.6036	282.187	6.70728	23	6	3	2	0	245.17	1374	9.23737	6.74879	6.38798	5.57205	4.05725	4.41461	4.99403	31.2273	30.1702	23.375	24.6598	23	22.1475	271.969	237.285	217.212	220.142	221.601	154.591	141.711	142.979	150.058	154.352	155.418	154.731	154.855	158.064	24.6628	3.57713	6.30946	-4.23898	10.0174	8.33104	5.29913	-61.2578	7.80733	-3.24483
4150	COc1cccc2sc(NC3OCCc4ccccc43)nc12	4	17.5159	146.287	5.77403	15	5	2	2	0	111.115	1110	7.64327	4.76786	3.88235	2.92407	2.18743	2.60863	2.55683	29.2105	29	21.9167	21.2326	19.6786	17.9216	242.456	215.625	171.968	180.33	203.393	158.287	143.847	151.323	153.279	156.051	161.749	158.53	157.142	150.404	35.4832	-9.82025	-5.16559	-52.3853	-15.6919	18.3669	10.9754	-44.5805	9.36565	4.05817
2820	CCOC(=O)C1C(c2c[nH]c3ccccc23)N(N=O)C(c2c[nH]c3ccccc23)C(C(=O)OCC)S1(=O)=O	11	29.6266	461.13	7.46868	18	12	4	7	0	402.938	1862	9.35069	4.78261	3.82667	6.29591	5.71792	4.12335	3.95745	29.0938	31.1029	24.319	26.6927	19.8783	17.1022	232.881	215.383	216.303	205.586	193.324	161.796	146.176	151.608	156.462	158.392	157.998	161.138	159.811	161.71	62.1879	61.7318	-75.2089	73.3067	139.087	150.339	-290.137	-345.221	20.7539	18.8672
2030	CN1C(N2CCN(C(=O)N/N=C/c3ccc([N+](=O)[O-])o3)CC2)=NS(=O)(=O)c2ccccc21	14	25.1999	3721.16	9.38494	11	14	7	6	0	388.049	1650	11.0283	4.6254	4.68165	7.60881	3.69092	3.52948	3.24932	32.3529	34.4815	24.5983	21.9767	17.0476	19.3933	231.612	207.72	171.516	155.903	160.126	166.558	152.212	162.05	161.535	166.237	167.219	166.194	166.704	163.517	45.4815	68.037	-21.2593	-93.5185	-63.3704	-27.3704	53	4.09877	9.05767	-0.957324
3757	COc1cc2c(c3oc(=O)ccc13)C(OC(C)=O)CC(C)(C)O2	7	18.1215	162.102	5.92114	10	6	0	6	0	218.035	1014	9.46341	2.07143	1.45977	5.31792	4.10711	3.57058	3.39943	24.7317	26.2326	21.0745	19.3	13.449	9.7931	220.918	215.941	188.168	170.096	152.086	160.896	143.99	153.868	154.274	156.693	156.182	159.673	162.332	164.75	96.4337	55.0405	-67.8858	80.5836	-51.7728	-74.602	-259.384	35.7305	12.9893	7.837
4299	OC1COc2ccccc2CNn2c(nnc2-c2cccnc2)SCCCSc2nnc(-c3cccnc3)n2NCc2ccccc2OC1	0	38.6767	689.648	8.12542	34	15	10	3	0	279.146	2452	8.083	4.00487	3.94917	3.3632	2.61579	2.68341	2.53682	29.5422	29.4831	22.6021	21.2524	20.8394	18.6312	237.738	203.031	201.642	199.383	190.245	162.429	148.843	154.419	158.149	162.741	162.177	159.741	160.15	159.709	89.8949	28.8294	8.74847	-126.801	-151.686	-68.3767	-26.4349	22.6115	14.3131	0.28756
1788	Cc1nnc(NN)n(N)c1=O	15	7.98502	38.2011	3.73818	6	7	6	1	0	129.583	510	10.2105	0	0	6.82018	2.35965	2.375	1	26.8421	27.8947	26.2188	17.9091	4.5	1	190.474	190.077	115.607	73.736	72.9529	181.022	174.027	174.935	176.6	187.724	179.172	180.815	181.74	184.918	36.8421	40.3657	-19.0194	-123.446	-49.6122	19.2105	17.4294	32.1773	7.42105	-1.38504
2474	Cc1ccc(NC(=O)CSc2nc3sc(C(N)=O)c(C)c3c(=O)n2-c2ccccc2)cc1	12	25.0816	1577.57	8.52679	21	9	4	3	0	279.896	1748	8.59402	4.72274	4.8109	5.38261	3.92553	3.45047	3.45109	33.6154	31.0364	28.2202	26.7667	24.6542	20.7115	253.434	240.773	213.458	221.653	213.305	158.281	144.869	148.863	151.991	155.351	159.244	155.4	152.68	155.785	66.4229	34.7899	-51.0929	24.331	-73.4735	-3.82791	-12.6027	-2.09402	14.5251	4.60059
4116	Cc1ccc(C2=CC(c3c(-c4ccccc4)[nH]c4ccccc34)c3c(nc[nH]c3=O)O2)cc1	4	26.7249	390.992	7.16261	27	5	3	2	0	200.083	1304	8.33333	5.07362	3.83648	3.70525	3.10037	3.20177	3.11635	24.1481	26.5763	20.6641	19.6835	19.0675	16.2516	253.221	233.373	226.984	233.706	213.254	156.262	142.773	145.882	149.455	154.057	152.496	150.678	153.472	158.02	54.69	29.2126	-0.499314	12.2483	48.8326	31.1811	-107.855	-158.214	13.689	4.1406
1428	O=C(c1ccncc1)N(/N=C/c1c[nH]nc1-c1cccc(Cl)c1)C(=O)c1ccc(F)cc1	17	24.9437	258.289	6.71723	23	9	5	2	2	297.061	1586	10.8001	7.38504	6.39107	6.32044	4.6403	4.36872	4.00678	33.7447	30.54	24.7449	24.75	23.5446	22.049	266.756	232.088	233.001	238.091	226.276	161.465	146.956	150.695	156.759	162.23	161.682	157.733	157.316	154.784	33.5491	-9.86304	1.50858	-34.6311	-48.6098	-26.2977	16.7291	10.6276	5.93979	-5.84201
3009	Nc1[nH]nc2c1C(c1c(-c3ccccc3)[nH]c3ccccc13)C=C(c1ccc(Cl)cc1)O2	10	26.0178	380.584	7.10486	26	6	4	1	1	158.894	1504	8.1099	4.51238	3.37407	3.11557	2.87612	2.87328	2.75801	29.4902	28.2679	22.0917	20.4574	19.0701	16.8133	260.699	235.792	228.906	229.606	207.64	157.033	144.998	145.08	151.198	154.242	152.808	152.293	155.521	160.455	40.101	17.6891	-8.40567	-32.8843	11.129	5.22051	-118.345	-110.536	12.2145	2.45329
3163	N#Cc1c(Nc2ccc(C(F)(F)F)cc2)nc(SCc2ccc(Cl)cc2)nc1-c1ccccc1	10	26.5662	458.882	7.35257	24	9	4	0	4	357.543	1900	10.721	5.95254	6.29947	7.15087	3.89784	3.59926	3.78308	38	32.283	26.1028	24.3186	24.068	23.5429	273.808	240.805	237.037	256.909	236.647	163.193	144.359	151.705	153.525	163.398	159.508	156.353	156.67	155.646	40.1221	63.9641	20.7279	-6.40014	-43.9798	-91.6515	-102.486	-0.337679	2.92	-4.4
906	Cc1ccsc1C1C(C#N)=C(N)Oc2[nH]c(=O)[nH]c(=O)c21	20	16.4179	123.373	5.55715	11	8	4	3	0	227.42	1122	11.1756	1.72414	2.32258	7.33613	5.84255	4.38282	3.68817	36.1935	33.2121	28.194	28.5867	12.6379	8.12903	259.218	252.912	222.287	198.326	125.096	161.489	149.475	150.467	151.507	156.118	158.224	159.011	178.671	177.153	37.2162	40.0921	-30.2516	69.8785	-4.31148	-69.0903	-203.78	136.186	9.7846	3.31322
2090	N=c1sc(-c2ccc(Cl)cc2)nn1CC(=O)N1c2ccccc2Sc2ccc(C(F)(F)F)cc21	14	27.3303	553.777	7.54054	23	11	4	1	4	375.241	2146	11.552	7.20833	6.35754	7.81753	3.86196	5.20849	4.60757	44.7083	36.1538	30.9439	27.9646	27.5982	29.5842	283.216	258.768	241.927	232.424	215.585	163.104	145.429	152.751	153.985	158.41	158.686	157.276	162.944	169.396	32.2051	33.4468	-6.76372	-28.1835	-26.665	-21.168	84.487	-61.6588	4.6875	-1.67188
2810	Cc1ccc(-c2nn(-c3ccccc3)cc2C2CC(c3ccc(F)cc3)=NN2c2ccc(S(N)(=O)=O)cc2)cc1	11	32.1707	515.368	7.63118	29	9	5	2	1	337.911	1852	8.58249	5.24823	4.50159	5.11986	2.77987	3.05172	2.93089	28.0606	30.6761	20.8	19.2169	20.734	18.7571	247.884	218.944	202.153	222.335	222.53	160.25	144.756	149.105	155.44	158.941	159.404	153.812	155.072	155.109	44.5952	41.354	-89.5036	-53.5833	7.38068	24.197	-60.1669	-90.9324	12.0817	-5.37006
3010	CC(=O)Nn1c(S)nnc1-c1ccccc1	10	12.2277	88.9512	4.95809	11	6	4	1	0	123.916	886	9.12726	1.68687	0.875	4.766	3.09044	2.96427	2.57973	34.0769	30.037	24.8367	22.4583	13.7273	7.70833	243.555	208.662	218.078	177.12	145.849	163.649	151.431	156.537	162.523	165.1	161.59	162.09	160.281	166.12	45.021	15.7657	-34.5548	-17.8142	-47.9446	-72.5258	-3.25115	22.2677	5.94083	1.36095
1317	COc1ccc(C2C3SC4=NC(c5ccccc5)(c5ccccc5)C(=O)N4C3=NN2CCON2C(=O)c3ccccc3C2=O)cc1	17	37.1347	2772.5	9.45356	24	11	5	5	0	345.094	2108	9.40335	5.38889	5.6413	4.72731	3.02939	3.03069	3.10169	28.8767	29.4375	24.7216	23.8503	21.0215	20.3696	254.214	233.565	210.382	207.327	204.444	157.827	143.971	149.733	154.333	155.468	157.753	156.77	157.154	159.67	87.5181	45.735	57.4616	-51.8203	-141.591	-115.472	-34.1116	-9.12174	22.811	12.7557
315	CCN1CCN(CC2SC(c3ccc(OC)cc3)N(c3ccc(Nc4nc(Oc5cc(=O)n(C)c6ccccc56)nc(N(C)C)n4)cc3)C2=O)CC1	25	41.1547	1723.28	9.10064	28	14	9	4	0	341.559	2364	7.54152	4.68391	4.08898	3.59536	3.03415	2.83357	2.73567	24.8842	26.505	20.7723	18.0305	18.9784	17.9044	221.92	207.941	176.799	185.452	195.008	163.368	148.215	159.421	156.82	160.267	160.56	162.468	159.917	158.53	154.098	84.7717	-7.70441	88.6949	108.182	-89.9131	-24.221	-42.4266	26.7968	4.29994
3195	CCOc1ccc(NCn2nc(C34CC5CC(CC(C5)C3)C4)n(-c3ccc(Cl)cc3)c2=S)cc1	10	27.5726	2356.99	8.98892	17	7	4	1	1	147.554	1808	5.72384	2.40334	2.32884	2.27006	2.13696	2.01703	1.92466	27.8154	25.7429	17.3757	15.0197	18.5055	15.1445	225.984	184.963	186.303	191.796	178.947	160.951	145.398	151.716	156.849	163.826	159.875	158.32	159.353	157.799	80.149	30.4537	-7.60742	11.493	-34.4404	-75.6602	-83.208	5.794	13.568	-0.00331361
3588	O=c1c(Cc2ccc(Cl)cc2)nnc2scc(-c3ccc([N+](=O)[O-])cc3)n12	8	21.4081	341.05	6.82528	21	9	4	3	1	260.481	1592	11.2118	7.28249	6.26984	6.85476	3.91988	4.13479	3.69511	41.8947	34.9512	28.0723	25.2529	29.9322	32.9464	281.274	248.253	221.777	234.782	242.133	157.716	145.404	146.895	152.999	158.821	157.182	157.42	159.347	153.759	34.1985	16.4546	-5.94809	-38.1922	-17.9909	-48.9692	-60.9313	-19.7666	4.68352	-5.35734
4503	CC1(C)O[C@H]2O[C@H](CNC3=CC(=O)c4ccccc4C3=O)[C@H](O)[C@H]2O1	0	20.1619	294.372	6.60114	6	7	1	6	0	248.812	1100	9.18182	5.16667	5.39474	5.65483	3.38499	3.60185	3.99598	25	26.4894	19.6018	16.4825	17.1154	17.0395	221.717	190.017	150.402	165.009	167.812	161.811	145.72	153.034	160.076	160.978	166.133	161.543	160.019	165.87	56.7376	13.626	-70.5806	-29.8802	-75.7025	-37.3388	105.269	75.3678	9.46643	-1.80733
1775	FC(F)(F)c1cc(N/N=C/c2ccc3c(c2)CCO3)c2cccc(C(F)(F)F)c2n1	15	24.0031	690.071	7.63541	16	10	3	1	6	495.347	1430	14.7907	12.0519	6.91803	11.5197	6.27778	12.4838	4.25956	33.2558	31.2174	24.9681	23.9184	29.0909	21.8852	253.094	230.656	203.716	197.768	198.05	176.286	150.449	163.234	160.16	169.508	171.031	178.355	192.01	162.341	45.4202	96.6701	21.4229	-6.71444	69.4208	32.8129	32.4835	-51.3856	0.637642	0.369389
1392	Cc1ccc(-c2csc(NC(=O)/C=C/c3ccccc3)n2)cc1	17	17.856	352.032	6.69663	17	4	2	1	0	149.337	1118	7.24217	4.35897	3.76923	3.82915	3.31264	3.30449	2.97222	28.6667	28.122	19.0633	18.6875	21.7885	19.8654	252.409	210.225	187.57	208.709	208.566	155.975	141.904	146.114	151.838	156.807	157.966	156.246	157.674	154.899	30.7345	-9.48243	-35.7196	10.1334	50.4995	-29.1648	-30.4179	-15.2156	4.95858	-5
4436	COc1ccccc1NC(=O)c1cn(CCO)c2c(cc(O)c3ncccc32)c1=O	0	23.2987	497.431	7.30807	20	8	3	5	0	292.778	1278	9.67347	5.64348	4.51546	5.97506	3.90341	5.12754	4.02835	26.0816	27.3269	23.1835	22.3729	18.9304	17.4124	239.181	230.765	207.598	180.579	176.876	160.488	146.529	152.088	154.846	156.838	155.171	160.448	162.98	161.558	47.8505	22.3894	31.0504	-26.2553	-31.6676	-40.681	-43.0242	-69.9434	15.7214	8.84007
2823	NC(CCC(=O)n1c(-c2ccc([N+](=O)[O-])cc2)nc2ccccc2c1=O)C(=O)O	11	22.3625	399.733	7.05551	16	10	4	6	0	404.278	1280	11.3333	6.05825	6.01905	8.98395	5.10877	4.35814	4.56878	28.4444	28.6383	22.2095	21.2202	19.8155	18.5333	240.35	212.749	208.772	220.913	198.55	162.788	149.11	151.219	158.824	164.08	160.874	155.782	157.205	160.478	46.801	67.2825	8.36296	-104.946	-123.017	-116.42	-1.08247	136.207	8.47556	-2.19111
338	Cc1cccc(Oc2nc(-c3ccc(NC(=S)Nc4ccc(Br)cc4)cc3)nc3ccccc23)c1	25	27.784	1140.97	8.2924	28	7	4	1	1	165.12	2770	7.84842	4.482	3.56114	2.94857	2.80927	2.7117	2.52099	49.4643	30.6333	24.6016	22.3468	25.3983	18.7857	267.876	227.985	226.344	242.249	230.235	155.55	143.228	146.718	152.68	158.261	156.14	149.948	150.576	152.047	53.267	14.8843	8.94309	9.24627	-42.5975	-52.3534	-95.215	-43.0443	7.62628	-4.43367
3838	CCCCCCCCO[C@H]1C[C@@H](O)[C@H](O)[C@@H](CO)O1	6.4	13.5729	989.596	7.53915	0	5	0	5	0	191.861	852	4.68085	0.988764	0.987654	4.08215	2.06548	2.08614	2.16564	18.1277	20.0426	11.9048	10.9675	8.97753	9.08642	167.692	127.254	112.217	113.091	113.01	167.661	148.48	157.49	166.027	167.289	168.53	167.239	167.17	167.705	19.9149	6.78995	42.9656	11.6098	6.18968	-22.8447	-13.4015	-18.7759	5.57447	-1.54052
2344	CCOC(=O)c1sc(NC(=S)Nc2ccc(C)cc2)nc1C	13	16.6201	226.827	6.21265	11	7	3	2	0	151.545	1344	7.30484	3.02646	2.96429	3.88577	2.63359	2.66064	2.38619	34.4615	29.6	24.6757	25.5526	21.9206	17.2143	236.858	209.812	192.402	203.913	179.617	160.636	146.97	154.568	156.758	157.027	161.157	156.141	161.398	161.863	58.9808	25.92	-36.7266	-8.19519	-60.5885	-31.979	-2.1819	6.43407	9.07101	2.68639
1920	CCOc1ccc(NCc2c(O)on[n+]2-c2ccc(OC)cc2)cc1	15	19.08	387.801	6.87678	17	7	3	4	0	171.944	1071	8.17778	4.68831	4.29412	3.82099	2.88002	3.28535	3.20792	23.8	26.0426	19.4835	17.3263	17.6494	17.2059	218.677	196.604	165.172	159.19	173.197	163.471	149.464	156.242	160.428	160.506	160.623	163.772	166.097	161.47	66	26	-55	-82	40	46	-29	-42	11.7417	1.68988
4028	Cc1ccc2[nH]c(-c3ccccc3)c(-c3cc(-c4ccccc4)nc4ncnc(N)c34)c2c1	5	26.7249	380.421	7.1352	31	5	5	0	0	167.583	1274	7.92593	4.82036	3.35057	3.1034	2.97447	2.91683	2.82854	23.5926	26.2881	21.0574	19.8582	18.9401	15.8391	254.219	241.859	236.051	242.474	219.078	157.217	144.052	146.77	149.634	153.805	152.898	150.655	153.216	157.868	57.7764	38.8848	23.1221	32.7558	-4.57888	-46.9739	-123.557	-182.218	16.0778	7.05761
359	COc1ccc(C(=O)/C=C/c2ccc(OCc3nnc(-c4ccc(Cl)cc4)o3)c(OC)c2)cc1	24	26.2604	480.587	7.39878	23	8	2	5	1	228.839	1664	9.33827	5.38384	4.89953	4.1607	3.31584	3.30249	3.25847	30.2545	28.569	23.3333	19.6783	20.5253	18.9362	249.759	229.582	185.584	193.06	197.266	158.142	143.505	150.788	152.203	155.343	158.965	158.23	158.447	157.419	70.2024	-7.07286	-58.1253	-82.2205	0.868324	56.6175	20.435	-53.0779	11.0413	-4.71901
133	N#C/C(=C\c1cnc(NCc2ccccc2)nc1)c1nc2ccccc2[nH]1	30	21.1323	947.037	7.84659	21	6	6	0	0	167.444	1066	8.65116	5.57576	4.6	3.89406	3.86698	3.34217	3.025	24.7907	27.0435	19.2609	16.9457	19.1212	17.45	252.351	210.3	200.966	213.273	209.894	160.205	146.703	151.248	155.792	164.641	159.389	163.582	157.9	157.356	31.4197	-3.40779	-14.5327	-13.9513	44.9584	5.76203	-25.325	-14.0249	5.41806	-5.35425
4430	N#Cc1c(-c2ccc(Cl)cc2)cc(-c2cccs2)nc1O[C@@H]1O[C@H](CO)[C@@H](O)[C@H](O)[C@H]1O	0	24.8628	261.039	6.72782	17	10	2	6	1	303.564	1838	9.25587	5.97151	4.85932	5.95224	4.07946	4.0252	3.91295	36.0392	31.1481	24.3065	22.4922	27.359	25.1855	250.857	211.972	204.793	223.808	235.861	159.09	144.395	148.273	156.755	159.48	159.093	157.21	153.788	153.591	9.38299	-11.4557	61.0511	18.9815	-10.7775	-44.4671	-98.88	-104.463	9.56747	-4.09343
3367	O=C(Nc1ccc(S(=O)(=O)Nc2ccc([N+](=O)[O-])cc2)cc1)c1cn(CCO)c2c(cc(Cl)c3ncccc32)c1=O	9	32.259	4853.66	9.89847	26	14	5	7	1	485.027	2230	10.9844	5.19347	6.56533	7.95126	4.23807	4.26191	5.775	36.5574	34.7692	26.958	25.7468	23.3357	22.552	260.47	238.608	217.791	209.29	193.735	159.863	146.222	149.945	154.791	157.941	156.043	157.666	160.539	161.062	15.7526	40.5136	8.87626	-50.6577	-122.636	-91.0525	-59.0124	111.18	9.6466	-0.72803
3259	FC(F)(F)c1cc(N/N=C/c2cccs2)c2cccc(C(F)(F)F)c2n1	10	20.508	477.709	7.12451	15	10	3	0	6	469.462	1474	16.0127	12.9128	6.65926	13.4132	7.15197	14.1379	4.70991	42.1143	35.8919	29.1594	28.5205	34.0462	29.2889	269.857	242.744	227.993	219.895	205.974	178.724	151.374	165.611	161.876	173.946	173.765	178.849	195.263	162.489	26.0166	98.2757	59.7457	-18.9576	8.99927	-23.9249	29.9728	-55.9615	-1.53061	1.22449
1446	O=[N+]([O-])c1ccc(/C(Cn2nnc3ccccc32)=N\Nc2nc(-c3ccc(Cl)cc3)cs2)cc1	16.73	26.996	478.346	7.39411	26	11	7	2	1	259.509	1860	10.161	6.58806	6.36139	5.19017	3.02849	3.45733	3.50511	37.2	32.9259	24.8019	22.578	28.8367	25.1414	269.499	230.297	204.718	227.179	236.043	160	148.188	149.681	156.772	161.734	162.877	160.139	159.587	158.364	43.1412	-0.398025	-49.4079	-84.6884	17.6158	22.9773	-34.0583	-38.1847	5.6224	-8.2384
1758	Cc1ccc(C2C(C#N)=C(N)OC3=C2C(=O)CC(C)(C)C3)o1	15	17.3739	134.817	5.69237	5	5	2	3	0	197.035	920	8.1	1.08889	0.378378	4.92587	4.00749	3.03704	2.68806	23	24.9048	19.101	15.9844	11.3111	7.91892	222.377	212.289	194.446	187.162	140.487	161.571	145.114	150.339	151.5	161.88	160.01	157.449	163.733	169.89	79.205	44.2375	-6.4025	127.07	-88.255	-117.377	-175.975	-74.765	13.445	0.9875
3407	CCN(CC)CC(=O)Nn1c(S)nnc1-c1ccc(C)cc1	9	16.4703	235.619	6.25067	11	7	5	1	0	152.444	1126	6.58857	2.58372	1.59556	3.5452	2.97486	2.7055	2.59292	26.186	25.25	19.2857	16.0388	18.9437	16.64	210.122	184.772	150.145	162.936	183.618	165.911	151.008	161.078	162.588	163.085	169.028	169.167	163.15	161.944	82.4002	50.5675	12.7172	48.1463	25.4526	-75.3305	-88.8459	-151.716	11.9627	2.15468
701	N=C1C(=S)N(c2ccc(Br)cc2)C(=S)N1c1ccc(Br)cc1	21	17.2344	173.501	5.94464	12	7	3	0	2	99.0729	3658	8.09753	2.99742	2.42455	3.1959	2.78441	2.56393	2.23107	118	43.303	43.0149	40.1385	80.7674	46	321.381	278.367	255.164	254.842	270.397	151.409	142.907	145.268	150.089	149.683	150.258	150.317	149.073	151.326	20.8263	-2.08752	-15.9642	-16.3844	-25.9961	-36.2994	-19.8533	1.55584	5.79396	-1.74402
452	CN(C)c1ccc(C2SCCC(=O)N2CCCNc2ccnc3cc(Cl)ccc23)cc1	23.66	24.2365	221.346	6.53113	16	7	4	1	1	177.953	1696	6.06982	2.41645	2.96825	3.06816	2.19008	2.10859	2.19821	29.2414	26.9672	20.0504	17.5325	14.6641	16.4118	229.208	203.406	165.728	149.758	154.206	161.065	145.639	154.571	155.917	158.692	157.811	161.42	162.021	164.26	67.0179	10.3894	-46.9618	-91.5444	-39.9598	-9.89687	28.6047	27.6569	12.8243	-1.85226
530	O=C1CSC(c2cc3ccccc3nc2S)N1c1ccccc1Cl	23	19.137	168.203	6.00064	16	6	2	1	1	138.258	1624	7.9286	3.57416	3.2877	3.7367	2.82218	2.5747	2.68302	43.8919	33.7	29.3214	30.7442	25.2254	19.625	281.836	249.467	247.112	216.56	205.768	153.432	140.037	144.397	151.014	151.852	149.195	152.208	154.598	154.598	37.2873	-0.820226	-52.6189	-33.5224	-23.1397	-5.75968	9.47812	-9.01818	7.51278	0.200146
3188	COc1cc(/C=C/C(=O)C2=C(/C=C/c3ccc(O)c(OC)c3)NC(=S)NC2c2ccc([N+](=O)[O-])cc2)ccc1O	10	30.7788	708.962	7.9501	18	11	3	7	0	399.569	1920	9.5453	5.62683	6.0125	6.14722	3.15312	3.38902	3.6088	29.5385	28.2059	23.0714	20.1739	20.761	22.1187	244.624	232.91	194.83	203.78	205.426	159.064	146.113	149.255	150.768	155.12	157.145	155.468	155.901	155.45	53.15	-11.8447	-53.8454	-108.662	-62.6199	-0.500618	110.152	66.0707	14.3948	-5.22509
1257	O=c1/c(=C/c2c[nH]c3ccccc23)sc2n1C(c1ccc(Cl)cc1)C1=C(N=2)c2ccccc2CC1	18	28.7653	491.239	7.44969	26	6	3	1	1	186.092	1820	7.96453	4.98914	4.64877	3.38349	2.89047	2.92101	2.83878	33.0909	30.1148	23.6957	21.7568	23.0902	24.1917	271.832	241.192	227.889	225.462	226.579	154.001	140.805	144.367	148.766	153.17	152.332	152.169	152.121	152.522	43.4431	9.09627	0.788891	-39.1906	2.24886	0.25717	-34.2421	-51.1636	12.3451	1.85488
3750	O=C1NC(=S)/C(=C/c2cc(Cl)cc(Cl)c2Cl)S1	7	13.1536	76.4721	4.86755	6	7	1	1	3	98.2275	1856	9.22399	4.8499	3.03704	4.6775	3.07849	3.86188	4.77709	88.381	48.8636	54.25	52.7576	76.4211	43.2222	358.318	311.994	318.348	338.369	295.937	148.735	139.402	140.483	144.351	149.162	147.197	147.077	156.566	167.108	-0.295288	-31.9287	2.36483	-5.37944	9.69035	3.72436	-4.47468	-6.59763	-0.657596	-4.54875
1995	COc1ccc(-[n+]2noc(O)c2CNc2ccc([N+](=O)[O-])cc2)cc1	14	19.2583	289.041	6.58286	17	9	4	5	0	264.222	1107	10.7	5.53731	5.12903	6.60556	3.61111	3.86567	3.93593	27.675	28.9524	22.2346	18.4889	20.0149	18.7097	232.443	212.541	170.043	178.963	187.611	164.367	152.029	155.038	159.336	163.913	162.994	164.086	165.582	162.404	46.055	19.5675	-51.1475	-92.675	26.3675	41.635	-64.7325	-84.045	8.45125	-3.93312
1431	Cc1ccc(C(=O)n2cc(C)n(-c3ccc(Cl)cc3)c2=S)cc1	17	17.982	186.856	6.06325	17	5	2	1	1	138.936	1370	7.42235	3.00285	2.63232	3.6562	2.83726	2.90452	2.5777	36.0526	29.1	25.5062	22.4045	24.2462	17.6727	260.351	239.893	212.538	202.878	200.287	156.302	143.088	149.741	151.008	157.071	153.049	154.374	157.502	153.105	54.0209	22.7318	-29.388	-23.1998	-15.2159	-46.3798	-60.3524	-23.3237	10.6413	-1.31163
4415	Cc1ccc(C(=O)/C=C/c2ccccc2)cc1	0	12.9063	95.5309	5.09008	12	1	0	1	0	122.111	654	6.45161	3.18421	2.15789	3.93907	3.37607	3.37135	2.35965	21.0968	23.25	15.8906	12.5938	15.6579	12.2368	239.608	200.732	164.867	199.597	198.158	154.936	139.143	144.16	149.707	156.654	158.689	153.065	152.236	153.588	23.8117	-11.5088	-25.4089	-3.76379	27.1041	-17.7971	-51.2539	-16.1894	4.08533	-6.00312
2615	COCCNc1nc(NCCOC)nc(Nc2ccc(C#N)nc2)n1	12	18.3848	287.348	6.57699	12	10	8	2	0	184.389	1080	8.57778	4.83721	3.2809	4.09753	3.10443	3.36499	2.80618	24	26.0217	18.6744	17.1889	18.2791	15.5843	207.861	181.108	171.415	187.104	174.092	170.246	155.474	167.947	167.687	169.661	175.228	166.049	173.73	162.736	61.602	15.7723	26.1254	19.2444	-28.721	-46.8217	-62.7635	-35.202	7.76	4.16
124	CC(=O)NC[C@H]1CN(c2ccc(N3CCNCC3)c(F)c2)C(=O)O1	30	18.6606	222.174	6.27893	6	8	4	3	1	260.917	1066	8.44444	3.875	3.86441	5.79815	4.23404	3.41435	3.56685	23.6889	25.3191	16.5536	15.9107	15.2361	18.0678	205.078	171.546	157.136	148.526	148.888	169.263	152.032	162.542	166.604	163.69	166.323	170.948	172.571	163.953	63.2262	22.9235	-46.4454	-12.8232	-13.6474	1.25235	-2.99111	-74.3723	7.57432	-0.424691
3300	CN1CCN(c2nc(Nc3ccc(C#N)nc3)nc(N3CCN(C)CC3)n2)CC1	10	22.7653	280.032	6.69962	12	10	10	0	0	178.389	1200	7.23636	3.93443	2.625	3.24343	2.9596	2.71767	2.27778	21.8182	24.9483	16.7463	13.4221	17.3607	14.2986	205.239	178.954	152.508	205.558	184.899	169.625	153.983	168.38	164.061	169.363	175.027	165.669	170.093	158.874	89.3719	34.8017	26.4298	87.7273	9.78512	-151.818	-131.24	-18.6942	10.7603	-4.61157
96	c1ccc(C2c3cc(Cc4ccc5c(c4)C(c4ccccc4)C4Cn6cccc6C4N5)ccc3NC3c4cccn4CC32)cc1	30	37.6176	512.606	7.74358	34	4	4	0	0	189.694	1708	6.24691	2.79699	2.46939	2.34191	2.19208	2.14578	1.99274	21.0864	24.6889	16.819	14.985	13.4812	11.9306	240.203	209.591	198.113	189.004	178.323	156.797	142.411	146.387	151.816	154.925	152.846	155.126	154.793	158.668	53.3553	-44.8148	-92.1558	-24.3499	44.3128	-58.3288	-59.9055	5.05975	17.7778	-4.22222
905	CC1(C)CC(=O)C2=C(C1)OC(N)=C(C#N)C2c1cccs1	20	16.5574	125.796	5.5766	5	5	2	2	0	180.427	1074	7.57958	0.760684	0.392857	4.87641	4.04155	2.79926	1.88194	29.027	28.0513	20.4731	18.1849	10.6667	8	237.562	218.148	205.502	189.572	129.999	159.138	143.291	147.32	149.051	160.996	157.548	154.278	166.787	166.204	53.5898	34.4309	34.3344	88.0259	-165.506	-72.8762	-122.796	65.8419	11.4266	-0.17458
3144	Nn1c(Sc2ccc([N+](=O)[O-])cc2[N+](=O)[O-])nnc1-c1ccccc1	10	19.3962	175.989	6.08671	17	11	6	4	0	328.642	1320	12.9841	7.92157	8.18182	9.38978	7.73029	5.1663	4.90614	37.7143	35.027	31.1429	28.0541	24.0392	23.4091	261.78	244.963	223.166	210.248	204.397	164.025	154.001	151.521	154.809	163.009	167.563	168.443	164.435	161.554	28.0465	28.5182	12.2413	-63.4244	-49.3713	30.1218	57.9532	31.7856	5.80163	-2.26776
330	COc1ccc(-c2cc(-c3ccc(Nc4cc(=O)oc5ccccc45)cc3)nc(N)c2C#N)cc1	25	27.5533	324.525	7.03513	28	7	4	3	0	260.333	1416	9.41818	4.86555	4.76636	4.73333	3.35917	3.37045	3.22222	25.7455	27.5085	22.2417	20.0615	17.5966	16.6542	256.41	242.49	206.626	204.404	197.63	157.271	143.982	146.84	151.224	153.011	155.08	155.91	157.057	157.536	56.0744	8.61157	-55.0413	-42.9917	-18.8843	-26.9421	-49.0826	34.6942	13.3359	-1.25256
982	Cc1noc(NS(=O)(=O)c2ccc(/N=C/c3c[nH]c4ccccc34)cc2)c1C	19	22.2336	178.063	6.21176	20	8	4	3	0	229.077	1382	8.92271	4.13853	3.52137	4.97994	3.73516	3.36259	2.72321	30.0435	32.9388	23.9897	20.5333	18.8442	16.2179	244.545	221.445	177.679	206.268	206.811	160.284	145.652	151.1	154.365	161.429	162.873	157.673	155.204	157.487	34.8021	50.2279	-96.9771	-84.2583	93.4543	-29.6757	-116.445	1.90884	10.3781	-5.44423
1187	COc1ccc(C(=O)CSc2nc(-c3ccc(Cl)cc3)c3c(C)nn(-c4ccccc4)c3n2)cc1	18	27.6223	1419.76	8.51101	27	8	4	2	1	208.287	1862	8.42945	4.60156	4.66104	3.7194	2.8837	2.79762	2.96441	33.25	30.1167	25.6752	23.878	22.8047	23.672	260.616	241.537	224.786	228.818	216.433	157.108	143.027	149.068	152.817	156.295	155.85	153.298	155.332	154.515	77.665	31.4118	-45.3061	-64.4068	-31.2771	-47.5721	-46.2693	31.2242	14.3941	4.44196
2464	O=C1N/C(=N\c2ccc(F)c(Cl)c2)S/C1=C\c1cccc([N+](=O)[O-])c1	12	19.5175	177.377	6.09457	12	9	3	3	2	309.481	1550	12.5897	7.82407	10.2	9.10238	4.34021	4.64	7.71667	45.5882	36.4722	30.971	28.3281	34.3958	31.2	285.674	243.847	251.093	239.032	237.106	160.65	146.321	147.448	156.157	160.267	155.13	156.436	160.092	164.772	16.378	-6.06331	-35.242	-37.605	22.3457	-40.9026	-26.7969	13.4529	0.690311	-7.02422
1928	C=C(C)[C@H]1CC[C@@]23CC(CC[C@H]2[C@]1(C)CCC(=O)O)C(COCC)C3=O	15	20.1371	341.121	6.78775	0	4	0	4	0	240.069	1082	4.86667	1.5	1.25786	4.00116	2.23991	2.75971	3.13941	18.0333	20.5484	14.2228	11.6694	10.2653	8.28931	187.33	179.452	132.824	115.849	120.955	163.641	143.891	151.632	153.877	158.255	161.042	166.612	164.881	171.265	61.78	4.38	-76.64	-56.72	0.83	11.37	-20.86	-64.29	21.5	5.5
2075	COc1ccc(OC)c(/C=N/N=c2\scc(C3=CC(=O)C=CC3=O)n2-c2ccc(C)cc2)c1	14	25.5414	774.944	7.84671	17	8	3	4	0	253.698	1580	9.0823	5.50794	5.04361	4.69811	3.28624	3.62078	3.31784	29.2593	29.0702	24.4579	22.6833	23.3619	21.3925	248.759	240.215	205.578	211.329	220.129	158.074	143.648	150.804	151.481	155.185	157.457	158.501	157.563	153.445	77.5656	1.38394	-56.7756	-2.33425	88.8814	-11.3852	-88.0882	-46.0431	15.8426	3.09877
1429	Cn1ncc2c(NCCc3ccc(F)cc3)ncnc21	17	15.6538	397.164	6.6775	15	6	5	0	1	161.639	844	9.05882	4.68085	5.19048	4.75408	2.67407	3.14066	3.10185	24.8235	26.7222	19.0556	15.7671	16.766	18.2619	228.177	196.528	151.41	151.836	181.882	168.345	151.759	160.609	162.829	166.182	164.536	171.983	168.003	159.546	48.5917	12.2803	-47.2872	-61.9031	-26.5294	-42.8962	-7.88927	16.4844	6.82007	-1.57439
895	O=[N+]([O-])c1ccc(O)c(/C=N/CCSCCc2ccccn2)c1	20	17.2179	1337.26	8.03129	12	7	3	3	0	239.309	1188	8.21111	2.29508	2.49425	5.98272	4.23691	2.62943	2.76064	29.7	28.5366	19.4458	17.5854	17.6885	16.3621	232.015	191.339	159.342	168.248	167.279	161.743	146.611	151.168	157.676	161.007	163.218	162.975	160.457	161.595	37.2725	35.0019	-6.06028	-32.4939	36.9158	4.27944	-30.0386	-18.0783	3.51562	-4.82812
2854	CCCCn1c(=O)n(C2CCN(C3CCc4cc(OC)c(OC)cc43)CC2)c2ccc(Cl)cc21	11	26.6844	450.954	7.33514	15	7	3	3	1	199.339	1634	6.08243	1.5739	1.92247	2.93145	2.22784	1.86915	1.92596	24.0294	24.3333	17.4551	16.095	11.5755	12.5604	211.395	188.965	163.398	155.614	136.546	162.778	145.946	156.478	158.548	158.552	160.487	159.906	163.568	165.73	106.222	77.6392	28.7985	-115.999	-204.333	-159.547	-20.817	28.876	22.8495	13.4135
3475	CC(C)[C@@H](C)/C=C/[C@@H](C)[C@H]1CC[C@H]2C3=CC=C4C[C@@H](O)CC[C@]4(C)C3CC[C@@]21C	8.7	23.084	659.085	7.55556	0	1	0	1	0	156.875	1116	3.0411	0.848485	0.726087	2.14897	1.63039	1.63191	1.61099	15.2877	18.8158	12.6826	9.71429	8.65368	7.86957	184.145	174.729	119.897	120.895	128.186	162.631	142.808	150.233	153.054	157.8	162.777	163.571	161.018	163.446	63.4526	14.3708	-60.7377	-54.012	0.648715	-8.55245	-17.7238	-0.107525	25.1828	-1.65885
4484	c1ccc(CSc2nnnn2-c2ccccc2)cc1	0	14.7684	164.911	5.74726	17	5	4	0	0	94.0034	968	7.82079	4.39024	3.40541	3.03237	3.04652	2.88573	2.6982	31.2258	30.4545	23.129	20.8197	17.8537	15.6757	253.944	211.812	199.291	218.623	198.293	159.562	146.782	148.729	153.503	161.733	163.577	160.735	162.547	157.233	34.4198	9.37762	-17.5054	1.88149	-7.81235	-22.4421	-41.4099	-38.4144	4.19771	-1.5692
1594	O=C(O)[C@H]1/C(=C/CO)O[C@@H]2CC(=O)N21	16	10.7326	81.212	4.73354	0	6	1	5	0	215.639	666	11.5652	1.57895	0	9.3756	5.9951	5.2193	2.5	28.9565	28.6667	20.6667	24.2791	7.42105	2.75	217.094	188.179	152.509	108.678	68.406	165.961	150.584	158.613	163.366	161.37	166.069	173.272	181.697	184.984	15.4896	-4.67675	-37.9338	15.6616	-36.0567	-34.7883	12.1285	10.3062	5.7448	3.00945
4117	C/C(=N\N=C1\NC(=O)/C(=C/c2cn(-c3ccccc3)nc2-c2cccs2)S1)c1[nH]c(-c2ccccc2)nc1C	4	31.1578	834.03	8.08725	27	10	7	1	0	226.674	1986	8.43369	4.63768	4.73913	3.65602	2.89402	2.78008	3.10753	32.0323	30.8657	23.9764	23.6357	25.1739	20.9928	259.84	225.564	222	222.335	219.827	158.209	145.525	148.998	155.496	159.795	156.977	155.488	153.973	156.897	74.4072	35.9779	-52.9714	-75.0659	-24.3099	2.58018	3.84414	34.5789	14.4134	0.0546306
1318	Clc1ccc(OCc2nnc3n2CCN3c2ccc(Cl)c(Cl)c2)c(Cl)c1	17	20.701	375.869	6.88475	17	9	4	1	4	110.466	2040	8.74789	4.83051	3.88477	2.90699	2.51778	2.66719	2.41682	53.6842	35.7317	32.8118	28.875	33.6271	28.6481	283.64	237.823	197.269	209.209	238.709	159.936	146.923	154.542	159.725	159.3	162.96	163.71	159.678	160.465	41.5701	-3.90534	-51.5801	-55.6589	20.3193	0.777196	-31.9727	-17.8008	5.23269	-5.06925
4169	O=c1oc2ccccc2c2c1Nc1ccccc1N2	3	15.4635	115.314	5.38951	16	4	2	2	0	135.194	776	9.93103	3.16667	1.44	4.66188	3.63768	3.21759	2.35333	26.7586	28.5625	22.9853	20.3433	14.75	9.96	261.483	231.149	203.198	199.744	179.187	156.706	144.901	145.762	154.168	158.938	157.77	156.227	156.507	157.834	23.6647	21.981	17.0202	-31.9715	-27.5517	-50.5898	-53.8859	-8.51843	5.98811	0.196195
91	N#Cc1ccccc1C(/N=N/c1ccccc1)C(N)=O	31	14.9467	152.988	5.72351	12	5	4	1	0	186.139	812	9.0625	4	3.12	5.81684	5.10185	3.68553	3.27333	25.375	26.6364	20.0303	19.9365	16.6415	14.22	247.356	209.106	206.6	203.407	194.779	160.979	146.898	148.378	158.384	163.371	164.965	160.949	157.723	157.28	22.4102	-6.83203	-2.17969	4.77734	-26.9062	-32.9141	-45.6992	-11.3672	4.91016	-2.95703
2265	COc1ccc(-[n+]2noc(O)c2CNc2ccc(Cl)cc2)cc1	13	17.7751	237.707	6.30395	17	7	3	3	1	150.255	1219	8.62118	5.2716	4.28968	3.95409	3.17944	3.49719	3.35639	32.0789	29.1	22.7143	18.5366	20.7778	20.75	240.148	212.51	172.433	180.049	190.759	162.124	149.293	154.065	158.635	162.656	161.856	162.605	164.392	160.379	40.631	3.11439	-42.5233	-53.7924	33.614	32.5274	-26.7521	-65.4565	8.06233	-3.21607
2396	C=CCCCCCCCCC(=O)N(C(=O)NC1CCCCC1)C1CCCCC1	12.1	20.6036	2204.62	8.72793	0	4	2	2	0	212.861	1132	3.54286	1.01031	0.769953	3.04087	2.51184	2.13445	1.80712	16.1714	19.0282	10.1561	10.77	10.2577	8.66667	176.99	129.668	138.562	146.221	137.785	165.757	146.34	155.154	164.895	166.674	166.614	163.17	162.243	163.344	51.6073	46.8996	60.1918	36.1265	-85.8776	-123.393	-105.146	-45.2637	7.04082	-0.795918
140	CCCCCCC(O)C/C=C\CCCCCCCc1nnc(Nc2ccccc2)s1	29.2	22.0297	36518.3	11.6042	11	5	3	1	0	171.031	1406	3.83253	1.18676	1.00973	2.47871	1.95321	1.96099	1.90464	20.3768	21.7429	11.12	11.1412	10.8582	10.1752	193.381	136.326	138.701	138.962	137.077	163.886	145.959	152.934	162.938	163.791	163.668	163.642	163.217	163.067	46.5159	13.5073	43.553	24.2844	18.5924	-12.8937	-39.6198	-44.809	4.9687	-2.27893
2412	CC[C@@H]1O[C@H]1/C=C1/C(=O)C=C[C@@]1(O)CCCC[C@@H]1CCC(=O)O1	12	17.9129	653.103	7.31464	0	5	0	5	0	229.479	992	6.7234	2.23232	2.36458	4.88254	2.52961	2.90334	2.81568	21.1064	23.0612	13.4715	12.812	12.9798	12.0208	201.091	153.191	148.794	145.697	148.431	162.714	144.137	151.967	161.215	160.762	161.752	161.747	160.959	163.417	61.1892	35.4301	-41.8945	-51.6324	-8.34178	-98.2263	-58.9737	-34.6831	8.5962	-4.46899
281	O=C(NS(=O)(=O)c1c(-c2ccccc2)noc1-c1ccc([N+](=O)[O-])cc1)c1cccs1	26	24.3834	367.874	7.03914	22	11	3	6	0	374.025	1776	11.8838	7.08865	6.27305	8.50057	5.47209	4.82936	4.1642	40.3636	39.2553	30.5376	32.8438	27.4787	26.5	274.915	241.612	247.476	246.574	235.367	156.839	143.514	145.466	151.527	158.133	155.151	155.421	154.774	154.073	8.75872	54.9933	-5.93411	40.2388	-78.4917	-61.6462	-104.073	-47.8462	4.89411	0.443698
1547	CCOC(=O)C1=C(C)NC(C)=C(C(=O)OCC)C1c1c[nH]nc1-c1ccc(Cl)cc1	16	22.8104	310.392	6.83645	11	8	3	4	1	239.866	1508	7.91861	2.40523	1.95398	4.44197	3.86849	2.84352	2.90267	27.9259	26.3036	21.6174	22.4308	15	13.8225	225.238	220.581	206.312	191.044	159.748	162.429	146.997	154.419	155.588	155.165	157.071	158.98	163.621	163.446	98.2591	86.2065	1.81874	-39.1463	-100.018	28.7332	-211.238	-160.037	19.3484	16.1317
3842	COc1ccc(/C=N/c2ccc(-n3c(Cc4ccccc4Nc4c(Cl)cccc4Cl)nc4ccc(Br)cc4c3=O)cc2)cc1	6	34.7623	1930.31	9.04704	34	9	4	2	3	240.394	3412	8.17793	4.85615	4.42939	3.48398	2.81978	2.84065	2.71488	49.4493	31.2297	27.0194	25.2195	23.5691	22.6209	271.269	241.481	220.694	235.405	224.343	155.833	142.454	147.222	153.036	155.635	155.624	152.121	151.775	156.076	61.3547	-10.3348	-45.5898	-31.8424	0.256084	-40.4818	6.04154	10.4085	13.1059	-4.85066
2043	Clc1ccc(/N=C\c2cccc3ccccc23)cc1	14	14.8778	164.264	5.74333	16	2	1	0	1	84.6997	962	6.89048	3.74074	2.73127	2.73225	2.37976	2.4611	2.30338	31.0323	27.4545	20.2537	16.9677	18.6905	17.4419	268.39	224.942	186.823	200.75	222.912	153.352	139.185	142.668	150.631	153.811	156.15	155	148.948	150.494	15.8926	-18.9933	-19.3793	-23.5428	4.24133	-0.264462	-15.9795	-19.7895	3.71384	-4.27888
160	COC(=O)[C@H](C)NC(=O)[C@@H]1CCCN1C(=O)c1cc(-c2nc3cc([N+](=O)[O-])ccc3[nH]2)ccc1O	28	27.2718	484.28	7.43543	15	12	5	7	0	429.611	1544	10.3103	4.60927	4.59712	7.40709	3.66879	3.76251	3.90248	26.6207	27.5738	20.7883	19.7603	17.0199	16.6835	227.364	202.464	193.026	188.805	172.254	164.202	149.693	155.234	159.857	163.532	162.008	159.794	160.954	166.011	82.7705	76.1403	-41.6409	-157.709	-30.2961	74.088	-23.7004	12.7693	13.9991	-2.68639
1853	Cc1ccc(-c2cn(CC3=C(Cl)c4cccc(C)c4OCC3)nn2)cc1	15	20.6321	219.124	6.34515	17	5	3	1	1	125.033	1276	7.07837	3.77356	3.50242	2.71811	2.26897	2.4215	2.35096	27.7391	26.4898	21.6604	19.157	15.8101	17.4493	238.388	222.949	180.273	162.752	170.612	159.747	144.72	151.515	151.638	159.264	161.184	163.225	162.737	162.541	70.4559	13.5976	-45.1373	-76.3041	-41.6122	17.6966	34.3188	-21.0537	11.9301	-2.43667
1666	Nc1ccc(-c2nc3ccccc3c(=O)n2C(=O)CCC(N)C(=O)O)cc1	16	20.8794	354.948	6.86522	16	8	4	4	0	306.5	1154	9.28889	4.67961	4.33333	6.81111	5.00351	3.84035	4.37566	25.6444	26.5532	20.6095	19.422	17.9126	16.1333	232.114	205.587	202.975	216.956	193.017	162.764	149.098	151.206	158.816	164.062	160.859	155.778	157.193	160.466	44.2756	52.2089	5.53333	-39.5822	-67.0222	-120.844	-74.5422	44.7333	10.1714	-1.23605
2124	CCOc1ccccc1/C=N\NC(=O)c1ccncc1	14	14.8778	120.319	5.48329	12	5	3	2	0	153.861	830	8.22857	4.24528	4.27273	4.39603	2.82269	3.19811	3.20076	23.7143	25.5556	18.6471	18.3387	15.2264	17.4091	228.05	193.349	170.939	160.537	165.903	162.294	147.655	154.585	159.314	159.808	164.417	164.039	163.818	158.085	39.4318	3.75755	-10.4637	-44.369	-22.5976	12.2816	37.8588	-16.6563	5.9951	-0.193469
3582	CC(=O)N(C(C)=O)c1nc(-c2nnc(S)n2-c2ccc(Cl)cc2)cs1	8	19.4651	188.66	6.15624	16	10	5	2	1	199.008	1726	10.0908	6.107	6.15603	5.37859	2.79308	3.4176	4.16422	46.6486	35.8205	32.4714	35.2297	33.807	31.4681	272.233	255.503	225.683	201.609	217.537	160.293	147.274	154.614	159.657	154.93	157.048	159.459	161.213	164.71	72.3254	36.288	-74.1282	-45.6306	-67.5774	17.5635	55.5868	-59.4812	10.9043	3.84441
1173	CCOC(=O)C1=C(C)NC(=S)NC1c1cccc(OC/C=C\COc2cccc(C3NC(=S)NC(C)=C3C(=O)OCC)c2)c1	18	33.5668	497.745	7.69169	12	12	4	6	0	313.25	2280	7.51111	2.66955	1.91346	3.91562	2.81467	2.60542	2.18759	28.5	26.506	20.5674	21.2041	15.2035	12.8269	226.709	207.821	189.191	189.161	153.253	161.085	146.867	154.278	155.76	155.948	158.752	156.047	162.123	162.349	108.253	45.1467	-26.6578	-78.3378	-205.476	-97.7333	56.4178	-24.6133	19.1719	11.2188
3635	COc1c(C(=O)O)c(O)cc2occc12	8	11.4397	68.8983	4.6381	9	5	0	5	0	186.167	688	12.2609	0	0	8.0942	4.95833	1.76316	1	29.913	29.6667	27.439	28.4222	2.36842	1	241.991	251.955	169.079	105.673	43.5281	159.763	145.986	150.844	150.032	154.344	159.811	171.549	183.286	184.918	22.9622	10.9055	-16.5066	14.4291	-122.826	-57.8166	84.1512	7.26654	8.89414	5.08318
3603	Cc1ccc2nc(Sc3cc([N+](=O)[O-])ccc3C(=O)O)n(-c3ccccc3)c(=O)c2c1	8	24.3744	308.956	6.8646	22	9	3	5	0	353.976	1530	11.0531	8.63141	6.33043	7.69512	4.40709	5.80716	4.62754	33.2609	31.5918	27.83	28.6111	25.8846	21.2261	265.05	252.916	241.614	252.89	249.291	157.208	144.137	146.664	150.238	155.684	154.527	154.926	150.88	150.741	44.9695	40.87	11.9011	-33.4974	-51.5171	-57.535	12.7139	17.7198	10.0279	1.11626
4464	CC(=O)OCn1nnn(-c2ccccc2)c1=S	0	12.9348	121.597	5.33134	11	7	4	2	0	133.514	950	10.0165	3.03226	4	4.94495	3.94989	2.76941	3.54762	35.1852	30.9643	26.52	25.3191	14.9677	16.9524	242.549	212.066	201.308	208.803	155.47	164.456	152.994	160.977	161.156	165.078	167.167	161.943	165.827	157.249	47.2759	8.41838	-62.9883	-7.73358	3.23274	-43.8384	-23.7113	-9.44124	5.16187	0.17284
2518	CCOC(=O)C1C(c2ccc(Cl)cc2)N(N=O)C(c2ccc(Cl)cc2)C(C(=O)OCC)S1(=O)=O	12	25.7645	413.747	7.24903	12	12	2	7	2	376.505	2194	9.24383	3.87076	2.41362	6.72329	5.86174	3.88588	3.50876	39.1786	34.1552	27.1064	28.6536	22.6383	22.763	242.987	217.704	221.7	200.455	189.765	161.106	144.287	151.635	156.952	158.98	156.947	160.328	160.203	161.13	50.1582	46.2381	-54.9097	116.98	99.2323	-57.198	-284.542	-254.495	14.5638	12.5383
4247	O=C1/C(=N/Nc2cccc(Cl)c2)CCCc2ccccc21	0	16.3609	194.392	6.01182	12	4	2	1	1	136.478	1078	7.15569	3.45029	2.89506	3.79104	2.60696	2.64396	2.55216	29.9444	26.8947	19.8295	17.8851	17.8246	19.6852	246.473	205.888	172.704	175.391	191.289	158.482	143.726	147.442	155.7	161.015	162.921	159.921	157.319	153.948	33.4644	9.85841	12.7372	-59.8825	-57.1704	-6.39476	-1.18061	-20.4801	4.8534	-3.16358
1976	O=C1c2ccccc2C(=O)N1OCCN1N=C2C(SC3=NC(c4ccccc4)(c4ccccc4)C(=O)N32)C1c1ccccc1	14	35.7205	2615.28	9.35073	24	10	5	4	0	328.066	2006	9.31079	5.07407	5.56078	4.75458	3.07455	2.96608	3.10326	29.0725	29.5658	24.345	24.2034	19.7556	19.6647	258.777	230.634	218	211.293	200.17	157.091	143.483	148.276	154.671	155.894	157.25	156.078	157.37	159.318	72.4301	49.9869	91.748	-31.2471	-174.704	-141.98	-27.8541	-1.95094	19.2359	11.5213
275	Cc1cc(OCc2nnc(-c3cc(-c4cc(F)c(Cl)cc4Cl)nc4ccccc34)o2)ccc1Cl	26	27.1339	759.552	7.8565	27	9	3	2	4	218.294	2138	10.2207	6.46016	6.43687	4.45497	3.39039	3.29592	3.85957	43.6327	33.1887	30.4667	28.1296	27.8182	29.5455	283.793	258.464	232.757	242.929	229.964	158.291	143.022	148.091	153.558	156.548	157.62	156.408	158.751	161.657	59.6213	14.1361	-46.3651	13.7826	27.3628	-5.46485	-22.6092	-72.0983	8.36735	-4.38776
1848	COc1ccc2nc3[nH]c(=S)[nH]c(=O)c3cc2c1	15	14.2396	103.409	5.22648	14	6	3	2	0	132.875	972	10.3128	4.58065	2.14035	4.92129	3.1899	3.76643	3.37297	36	31.3103	26.8036	25.1818	21.871	20.1053	263.758	249.431	192.135	195.667	172.912	159.176	148.059	152.689	152.637	157.34	158.738	157.784	165.04	160.126	30.255	-1.18259	-32.9631	-25.4507	20.5909	0.523853	0.131382	-45.9665	6.10562	0.278464
2932	Cc1cc(C)cc(NC(=O)Nc2c(-c3ccc(F)cc3)nc3ccccc3c2O)c1	10	23.6793	469.444	7.25016	22	6	3	2	1	273.056	1240	8.88	5.30275	5.08571	5.46111	3.55328	4.00866	3.73915	24.8	26.2264	21.0455	18.7273	18.8257	17.6952	242.517	224.022	206.704	184.739	198.676	160.992	145.499	149.249	154.539	160.286	159.313	161.276	160.326	159.972	58.32	30.64	-19	3.44	-11.76	54.08	-80.24	1.6	11.4352	-0.5776
2754	COc1cc(/C=C/c2nn(-c3ccccc3)c(/C=C/c3ccc(O)c(OC)c3)c2/N=N/c2ccc(S(=O)(=O)Nc3cc(C)on3)cc2)ccc1O	11	39.9397	1353.57	8.83974	34	14	6	7	0	415.994	2362	9.37885	5.91013	6.12418	5.01197	3.27957	3.30494	3.15235	28.4578	30.7386	23.8779	20.9471	20.0392	20.9755	243.81	225.933	207.174	218.926	211.195	160.02	145.854	150.902	155.11	159.337	158.835	155.505	158.615	155.081	74.7825	45.7634	-72.5579	-114.274	-43.6025	31.0873	-46.7068	29.5408	18.9778	-3.76847
1236	O=C1N/C(=N\c2ccccc2[N+](=O)[O-])S/C1=C\c1ccc(Cl)cc1	18	18.701	173.524	6.03178	12	8	3	3	1	247.703	1470	10.9426	7.19259	7.39181	7.28539	4.32529	4.59971	6.5124	43.2353	35.1389	28.0145	27.4219	28.5	29.9474	281.381	237.552	243.834	239.619	218.739	157.16	145.124	145.91	153.449	158.576	155.361	155.918	159.592	159.07	16.4726	2.26464	11.8968	9.61763	-5.57495	-43.6873	-22.3035	-3.91174	1.88581	-3.84429
3794	CCCCc1nc(Cl)c(-c2cc(-c3cn(S(=O)(=O)c4ccc(C)cc4)c4ccccc34)nc3c2C(=O)c2ccccc2-3)n1Cc1ccccc1	7	40.2617	1110.77	8.62225	38	9	4	3	1	345.36	2442	7.88011	5.05556	4.66548	4.16097	3.31335	2.93365	2.82819	29.4217	30.0222	23.408	22.4484	22.2672	21.7092	254.375	232.9	232.438	251.425	231.747	156.357	141.112	147.714	151.384	155.334	154.744	150.427	151.466	152.392	81.3521	136.748	129.691	81.8816	57.1185	-39.0017	-163.293	-87.1565	25.6078	18.4718
3016	CCSc1ccc(OCc2nnc3sc(-c4ccccc4O)nn23)cc1	10	20.4537	719.571	7.53417	20	8	4	2	0	156.035	1500	8.44974	5.18519	4.43827	3.71511	2.93026	3.21688	3.10528	35.7143	32.7556	26.0357	24.4051	23.2857	24	255.244	223.042	195.044	192.315	206.494	158.845	145.586	150.011	155.509	155.556	157.591	162.738	162.699	158.876	55.387	45.0978	26.2011	-12.2129	60.3112	27.8758	-61.1534	-69.0499	10.0272	4.42404
950	NS(=O)(=O)c1ccc(N2N=C(c3ccc(F)cc3)CC2c2cn(-c3ccccc3)nc2-c2ccc(F)cc2)cc1	19.33	32.1707	515.368	7.63118	29	10	5	2	2	394.911	1894	9.75309	5.78388	5.03151	6.26842	2.97096	3.25123	3.19646	30.0635	32.0294	21.6779	20.5974	21.5165	19.6269	254.296	220.587	209.097	222.698	224.273	161.881	145.407	149.276	157.59	159.694	159.009	154.794	155.657	156.503	31.8007	22.6152	-113.529	-102.044	-5.26441	56.882	-14.3947	-64.7676	8.60973	-6.85513
980	N=C1NC2NN(c3ccc(Cl)cc3)NC2C2CCCCC12	19	16.9871	169.166	5.87282	6	6	5	0	1	110.005	1094	5.50256	1.98148	1.7194	2.68306	2.00093	2.01392	2.18672	26.6829	25.3636	15.8548	13.6047	14.0972	14.7288	212.072	166.774	135.203	136.473	158.017	166.454	152.111	155.104	164.393	168.481	171.639	170.195	162.605	158.705	33.5997	11.2954	-13.0262	-21.0038	-27.3786	-25.185	-9.10178	-24.4242	6.8376	-3.78049
1034	c1ccc(C2=NN(c3nc(-c4ccccc4)cs3)C(c3cccs3)C2)cc1	19	21.7181	271.501	6.59722	22	5	3	0	0	116.535	1468	7.06566	4.26104	3.30233	2.64851	2.29513	2.42845	2.33075	33.3636	31.2708	21.8265	24.9789	23.6386	19.5698	267.484	215.592	219.1	225.206	239.265	154.124	140.873	144.805	153.687	153.324	155.51	153.608	149.642	148.561	30.9757	-3.03742	-17.4118	-9.74587	-2.53283	-28.0096	-27.2739	-60.6419	7.64463	-0.853822
3561	COc1cc2nc(Sc3cc([N+](=O)[O-])ccc3C(=O)O)n(-c3ccccc3)c(=O)c2cc1OC	8	26.3459	381.625	7.16821	22	11	3	7	0	383.253	1696	11.5381	7.96588	7.04497	7.51477	4.20479	5.41463	4.75941	33.2549	31.7778	29.8269	30.1379	24.9213	23.2857	257.074	261.922	227.641	239.037	227.861	158.805	145.473	150.621	150.473	153.699	156.702	154.473	156.397	152.795	60.2459	30.6615	-10.2551	-85.7855	-29.4177	41.1709	11.1155	-48.5489	15.2376	6.589
1975	S=c1[nH]nc(-c2cccc(-c3cccc(Cl)c3)c2)o1	14	14.9871	104.644	5.29242	17	5	2	1	1	88.6579	1220	8.78748	4.21922	3.90598	3.16635	2.58389	2.70259	2.78276	43.5714	32.8667	25.3684	22.9815	25.4054	30.7692	286.17	242.243	225.687	210.892	203.6	154.386	143.522	145.398	148.292	152.946	153.49	154.761	159.867	162.239	19.6898	-7.1678	-15.0872	-17.9297	-9.37617	3.48047	-7.70345	-16.9579	2.20663	-3.25128
2447	N#Cc1ccc(Nc2nc(N3CCCC3)nc(N3CCCC3)n2)cn1	12	19.7181	232.414	6.36481	12	8	8	0	0	156.389	1024	7.68889	3.24	2.28814	3.47531	2.8902	2.52222	2.16384	22.7556	25.6458	15.5179	17.0102	15.96	12.4492	217.066	163.225	207.508	201.103	183.601	167.64	151.748	162.23	166.144	173.022	167.688	166.743	166.05	158.315	74.4948	81.5699	67.5101	16.4825	-144.288	-162.988	-114.914	52.4553	6.64593	0.41284
2133	O=C(NOCc1ccccc1)c1ccc(Cl)cc1	14	13.6134	127.747	5.43784	12	4	1	2	1	130.672	982	7.92016	4.01852	3.51634	4.35573	3.30881	3.18673	2.9646	32.7333	28.1613	20.6557	16.7931	19.8889	18.2647	249.41	199.691	164.527	199.065	200.697	158.148	144.239	148.205	155.082	163.063	167.489	159.661	155.435	151.738	15.0702	-27.6831	3.5854	-0.956818	-19.3399	-10.0695	-10.6472	-22.0452	1.77778	-6.55556
3344	CCOC(=O)C(O)(Cc1nc2sccn2c1[N+](=O)[O-])C(=O)OCC	9	17.9892	218.577	6.2626	8	11	3	7	0	340.899	1334	11.4986	5.76404	2.5101	8.74101	5.27245	6.47014	3.3931	34.2051	31.8	26.2125	27.8375	23.5506	18.2576	225.985	203.551	208.257	174.928	161.771	165.674	150.694	158.38	163.23	164.114	159.966	165.739	168.255	164.969	78.2396	109.296	39.0975	-97.8142	-100.13	19.4181	7.38498	-128.354	13.4444	9.22222
3832	N#Cc1c(-c2ccccc2)csc1NC(=O)c1c[nH]nc1N	6.6	16.9871	149.87	5.79823	16	7	5	1	0	187.615	1116	9.64983	6.65217	5.41463	5.68529	4.20424	4.21638	4.76423	33.8182	31.8571	25.1538	27.3333	22.5435	18.8293	264.376	236.824	214.074	230.867	215.476	160.151	149.068	147.943	153.262	157.761	158.887	155.584	157.556	164.067	19.6543	5.25926	-14.9012	-21	2.75309	5.41975	7.23457	-46.3457	7.63545	-1.44904
662	O=C1C2C(NC3/C(=C/c4ccc(Cl)cc4)CCCC3C2c2ccc(Cl)cc2)NC2NNC([C@H](O)[C@H](O)[C@H](O)[C@H](O)CO)N12	22	34.1407	1001.26	8.36763	12	13	5	6	2	379.844	2324	6.79012	3.14218	2.90085	4.74805	2.91912	2.73801	2.72792	29.05	26.2941	18.5314	16.5766	15.9046	16.7778	217.231	184.881	168.856	165.832	162.348	164.388	149.459	153.529	160.03	163.526	162.533	163.884	163.718	164.68	15.4963	-37.4269	9.98438	-2.57215	-19.8677	-59.8457	-31.1188	-31.4198	15.7445	-5.95703
911	COc1ccc(/C=N/NC(=O)c2cc(Cl)c(Cl)[nH]2)cc1	20	15.0965	271.892	6.29855	11	7	3	2	2	142.038	1332	9.07129	5.40196	4.69206	4.58188	3.13501	3.59214	3.24633	42.9677	32.1562	31.4912	20.7273	24.4706	23.4857	258.655	227.148	171.861	193.71	219.603	162.044	149.565	154.555	157.721	163.576	167.73	163.194	155.171	161.527	26.4716	-22.867	-34.4898	-7.60937	11.5201	20.8954	-12.1408	-30.0412	4.69719	-5.65661
3507	O=C1C(Cl)C(c2ccc(Cl)cc2)N1c1ccc(-n2c(Cc3ccccc3Nc3c(Cl)cccc3Cl)nc3ccc(Br)cc3c2=O)cc1	8	37.6762	1752.49	9.01636	34	11	4	2	5	272.099	4024	8.42124	5.00469	4.94285	3.88714	2.94353	2.82847	2.7843	57.4857	33.8026	29.5689	27.7045	26.25	25.5753	286.955	248.424	233.304	237.625	228.281	154.94	141.991	145.904	153.318	154.489	154.404	152.732	152.807	154.894	51.9938	-2.83719	-32.504	-26.3885	-42.9693	-67.526	23.9484	25.615	11.4339	-8.25612
1334	CC1(C)CC(=O)C2=C(C1)NC1NC3NNC(c4ccc(Cl)cc4)N3C(=O)C1C2c1ccc([N+](=O)[O-])cc1	17	30.078	515.412	7.5533	12	11	6	4	1	348.762	1802	8.33758	3.64278	3.97531	5.44941	3.12768	2.76225	3.01153	28.1562	27.2609	19.6793	16.7974	16.3692	17.5606	229.377	206.114	187.666	184.107	171.012	163.544	149.354	153.697	156.146	163.848	161.548	160.436	163.311	161.852	64.3195	18.5208	4.4158	76.1567	-143.408	-22.3852	-47.1012	57.8006	13.6497	-5.87549
811	COc1c(C(=O)O)c(O)c(S(=O)(=O)Cl)c2occc12	20	14.6024	99.0389	5.23737	9	9	0	7	1	283.86	1360	13.925	0.511111	0	10.9177	8.71274	3.10037	4.7037	52.3077	49.2593	41.2979	45.2281	12.84	10	271.855	293.526	219.326	137.954	99.9609	159.078	143.841	151.154	146.715	153.614	155.548	173.043	173.99	182.504	9.51355	12.1853	-13.0236	37.4785	-122.529	-46.2599	80.2509	-26.2605	7.9216	11.5133
2108	Cc1cc(=O)oc2cc(OCc3cn(CCCCN4C(=O)c5ccccc5C4=O)nn3)ccc12	14	27.0245	6906.61	10.064	21	9	4	5	0	298.528	1438	9.67857	4.80612	6	5.33085	3.14064	3.0771	3.40605	25.6786	27.4333	20	17.708	17.0102	19.0449	237.982	206.642	170.973	166.378	174.028	160.898	146.047	153.242	156.84	161.219	161.914	162.892	164.563	159.457	92.1837	65.1224	-21.6735	-113.102	-159.735	-62.9388	-34.1429	84.6939	11.5	0.4375
2240	CCOC(=O)c1sc(NC(=O)Nc2ccccc2)nc1C	13	15.8036	225.397	6.1598	11	7	3	3	0	194.087	1114	8.67901	4.31579	3.34	5.3913	3.3832	4.20029	2.58685	30.9444	29.4054	23.6471	24.6875	19.0351	16.24	232.538	199.183	193.393	190.755	171.494	162.397	148.174	155.579	161.171	158.598	163.714	158.461	166.283	162.872	51.5857	35.3539	-30.3923	-7.64883	-71.5528	-33.8601	0.337449	14.9781	7.29707	3.96296
1154	Cc1cccnc1/N=C/c1cccc2ccccc12	18	14.8373	140.191	5.58486	16	2	2	0	0	93.8889	724	6.9697	4.18182	2.4	2.84512	2.36059	2.72727	2.46667	21.9394	24.6857	18.3768	14.9429	18.2955	14.08	246.109	219.265	178.351	178.693	224.568	156.571	141.539	147.393	150.584	158.941	156.26	160.418	150.791	152.339	33.7346	4.84206	-24.6253	-64.0762	3.25069	25.1038	-32.5657	-54.6042	7.30487	-2.06979
2151	COc1ccc(NS(=O)(=O)c2ccc(/N=C(/C=C(O)/C=C/c3ccc(O)c(OC)c3)\C=C\c3ccc(O)c(OC)c3)cc2)nn1	14	34.4446	1377.04	8.73177	24	13	4	8	0	419.438	2146	9.25926	5.40787	5.22917	5.59251	3.38551	3.45859	3.65714	28.6133	30.5897	23.9333	20.1497	19.4783	20.3125	237.15	225.235	186.542	192.822	195.367	160.545	145.775	152.022	153.872	157.638	159.034	157.004	157.91	155.338	45.2593	9.92593	-89.9259	-107.975	-45.5062	17.8148	112.395	34.1975	15.0672	-7.6048
219	COc1ccc(NC(=S)Nc2ccc(-c3nc(Oc4cccc(C)c4)c4ccccc4n3)cc2)cc1	27	28.3817	1451.12	8.56102	28	7	4	2	0	183.236	1648	7.94074	4.55014	3.55473	3.05393	2.76182	2.78096	2.53531	27.4667	27.2188	21.3906	19.9627	19.8293	17.4403	250.514	223.559	210.062	226.319	223.53	157.304	144.168	149.152	152.986	158.003	157.294	152.303	151.917	152.964	69.202	15.2194	-16.2998	-11.5523	-12.7526	-39.3306	-102.66	-44.3116	11.5511	-1.94222
500	FC(F)(F)c1cc(N/N=C/C2CCCCC2)c2cccc(C(F)(F)F)c2n1	23	21.2151	671.218	7.50235	10	9	3	0	6	475.292	1298	12.4091	9.89157	3.73611	10.8021	6.1477	11.4003	3.40856	29.5	28.087	19.4595	19.2566	25.8795	17.375	225.999	186.964	187.052	194.787	183.093	179.112	151.585	164.262	164.144	174.224	175.898	178.629	188.543	162.288	70.595	208.967	208.388	150.165	99.8017	17.6694	63.1488	-91.7603	1.56095	3.22262
2842	COc1cccc(-n2c(C)cn(C(=O)c3ccccc3OC)c2=S)c1	11	19.137	210.733	6.26688	17	6	2	3	0	168.625	1248	8.24289	3.01569	2.9375	3.92151	2.97386	2.71895	2.7669	29.0233	27.4667	25.2588	23.8454	18.0353	14.45	240.44	241.772	202.73	183.609	186.918	158.692	144.965	154.199	151.628	154.62	154.055	160.181	155.465	157.729	70.4501	21.5087	-30.9822	-30.9147	-33.9987	-73.5207	-67.5222	-9.73529	16.1422	6.54191
4386	CC(=O)CSc1nc(NN)c2c(c1C#N)CCCC2	0	14.1992	149.179	5.647	6	6	4	1	0	170.837	1000	6.98413	2.375	1.07547	4.88105	3.42199	3.74552	3.23585	28.5714	27.4444	21.575	20.8272	12.75	9.66038	222.557	201.591	187.365	161.47	136.718	164.136	148.822	153.277	156.709	159.849	160.67	165.835	166.31	170.818	51.8026	36.0927	-8.161	-29.7996	-82.1779	-50.427	3.85088	-39.8733	9.96	5.88
1794	CCOC(=O)C1C(c2cccc([N+](=O)[O-])c2)N(N=O)C(c2cccc([N+](=O)[O-])c2)C(C(=O)OCC)S1(=O)=O	15	28.7308	532.33	7.61227	12	16	4	11	0	604.438	1970	11.9741	6.16987	6.99024	10.074	6.11739	4.85942	8.05	32.8333	33.629	26.349	28	23.5192	20.6732	232.526	217.459	223.599	200.02	193.578	164.165	148.317	152.977	157.804	160.64	158.038	162.616	162.085	164.845	71.7817	96.9578	-64.0668	-1.07914	21.5186	-97.1146	-184.189	22.3883	15.18	12.92
4240	CN1C2CCC1CC(OC(=O)C(CO)c1ccccc1)C2	0	16.3205	227.144	6.16752	6	4	1	3	0	172.167	876	5.81818	1.92857	1.75862	3.91288	3.10014	2.61905	2.28736	19.9091	22.4783	13.935	12.1615	12.619	11.3218	200.164	165.407	124.814	163.131	156.28	163.096	145.368	153.931	159.439	161.447	168.362	160.63	160.157	161.525	35.595	-11.686	-37.6777	40.4959	27.6942	-48.5372	-73.1901	-25.5702	8.41839	-4.16839
405	O=C(c1ccc(-n2c(-c3ccccc3)nc3ccccc3c2=O)cc1)N1NC(S)SC1c1ccc(Cl)c([N+](=O)[O-])c1	24	32.698	541.493	7.70532	28	12	5	4	1	358.925	2366	9.89112	4.90798	4.8486	5.88401	3.37666	3.15982	3.88921	38.7869	32.7879	27.0559	27.1513	21.9509	21.7566	273.497	243.628	244.024	232.484	211.774	156.659	144.359	146.833	152.529	157.125	154.46	152.113	152.154	158.502	54.6716	42.5228	48.2869	-70.2584	-170.823	-147.869	43.6307	122.904	10.5442	-0.343456
495	CN(C)C(O)COc1c(Br)c(Br)c(Br)c2c1OC(C)(C)C2	23	16.2474	243.209	6.23586	6	7	1	3	3	126.408	4438	6.54363	1.99839	0.624799	3.24124	2.60079	2.23408	2.29536	113.795	37.55	62.7191	40.9909	35.9855	26.8261	243.371	228.922	197.448	214.456	193.603	161.28	145.994	157.874	154.371	162.755	159.753	154.174	154.868	163.276	65.5348	21.3579	-10.1074	14.5296	-81.6256	-71.9203	-15.9937	-99.1551	13.2709	-0.753452
1124	COc1cc(/C=C/C(=O)C2=C(/C=C/c3ccc(O)c(OC)c3)NC(=S)NC2c2ccccc2)ccc1O	18	28.4792	623.277	7.74332	18	8	2	5	0	286.014	1744	8.13404	4.7451	4.82456	4.5399	3.0567	3.02148	3.15708	27.6825	26.8182	21.7206	19.451	19.366	19.5855	242.151	227.001	195.01	199.854	201.044	157.809	144.383	148.637	150.35	154.145	156.435	155.26	154.712	154.766	48.4609	-23.5171	-33.4513	-66.8395	-47.6543	-18.6818	76.1235	25.2291	14.6992	-2.63467
566	Fc1cc(F)c2nc(-c3ccc(-n4cncn4)cc3)n(Cc3cccc(Cl)c3)c2c1	22	24.1272	404.867	7.10217	26	8	5	0	3	254.061	1502	10.9001	6.34792	5.92354	5.77411	3.36894	3.77433	3.9802	34.1364	30.8958	24.3814	22.9806	24.3838	23.1935	268.799	237.101	225.183	226.772	224.411	163.859	147.205	153.386	157.413	162.357	158.097	157.011	158.011	166.331	38.4739	-16.4222	-30.7415	21.4908	-13.0047	-23.8208	2.37935	-63.0044	6.07438	-3.41322
2025	COc1ccc(/C=C/C(=O)c2cc(Cl)c[nH]2)cc1OC	14	14.9871	101.203	5.31027	11	5	1	3	1	148.228	1084	8.40015	4.24738	4.49242	4.35963	2.77006	2.93458	3.16463	31.8824	27.9714	23.7258	19.1846	16.5472	20.1591	240.717	223.087	172.093	166.117	166.726	159.603	145.046	153.101	152.776	154.384	159.394	158.834	162.464	158.857	39.2576	-12.0328	-32.1827	-61.6291	-57.6405	26.9258	69.5799	30.9082	8.24221	-1.55363
2789	COc1ccc(-c2cc(C(=O)c3cccs3)c3c(=O)[nH]c(=S)[nH]c3n2)cc1	11	21.2987	264.352	6.57053	21	8	3	3	0	210.628	1548	9.97222	5.71667	3.95322	5.26571	3.2863	3.78218	3.30942	38.7	33.1163	27.7831	28.4405	28.5125	25.2763	275.589	254.727	231.669	239.964	238.765	155.444	143.731	147.636	149.901	151.948	154.672	151.858	152.485	156.502	37.0078	11.49	-6.42556	-6.30444	32.2578	-17.7711	-78	-84.9956	9.06687	1.56313
3324	N#Cc1c(Cl)c(Cl)c(Nc2ccc(Nc3ccc(Cl)cc3)c3c(=O)[nH]cnc23)c(C#N)c1Cl	9.5	25.5984	364.253	7.09177	22	11	6	1	4	242.605	2316	10.8005	6.90071	6.92044	5.64197	3.90855	3.71255	4.00145	53.8605	36.8478	37.9167	36.9899	31.883	35.1235	309.776	284.429	259.962	258.495	251.921	157.307	145.684	146.666	153.136	157.988	156.054	154.699	156.819	159.043	18.2939	-6.96169	1.76932	-0.313429	-14.2747	-7.14124	0.801047	-19.1166	7.44456	-4.30719
1232	Cc1cc(=O)oc2cc(Oc3nc(Nc4ccccc4)nc(N4CCN(C(C)C)CC4)n3)ccc12	18	27.853	423.736	7.30187	22	9	6	3	0	226.528	1450	7.96825	5.99099	5.0873	3.59568	3.01295	3.26877	3.09634	23.0159	25.6269	18.3221	16.2317	21.6577	19.9365	222.077	195.468	154.641	174.547	215.007	163.463	148.146	158.4	160.112	161.597	167.906	168.217	163.746	158.394	114.575	99.5772	16.3406	103.403	79.1514	30.515	-139.079	-99.0635	13.4825	0.611237
3912	Brc1ccc2oc(C3=Nc4ccccc4SC(c4cccc5ccccc45)C3)cc2c1	6	25.3226	241.789	6.61947	25	4	1	1	1	132.609	2584	7.54105	4.72652	3.98735	2.70632	2.40174	2.5327	2.48007	52.7347	32.1111	26.8595	24.3115	22.384	21.6833	280.701	246.846	227.531	218.681	224.367	150.93	137.659	140.634	147.628	148.498	148.504	150.612	150.978	149.436	37.2478	-0.185898	-33.8279	-72.0269	6.16087	47.5899	1.09345	-62.5355	7.88838	-2.33569
4122	C=C1CCC2C(C)(CO)C(O)CCC2(C)C1C/C=C1\C(=O)OCC1OC(=O)CN	4	22.3079	866.906	7.82964	0	7	1	6	0	303.847	1258	6.16129	2.51534	2.29032	4.90076	2.47017	3.0818	3.00735	20.2903	22.2188	15.9385	12.2427	13.5276	12.1419	191.69	183.512	126.238	115.759	146.191	164.769	146.658	152.894	154.284	159.353	163.433	168.563	161.956	166.928	62.8918	24.8075	-58.9438	-84.1259	102.618	141.789	-13.6587	-151.323	20.7924	-4.67248
2373	Cn1c(NN)nc(-c2cccc(O)c2O)c(C#N)c1=O	12.92	15.0037	109.575	5.38976	12	8	5	3	0	244.944	880	11.0323	4.64583	0.761905	7.90143	5.88798	6.55556	4.05556	28.3871	28.75	26.9355	23.3478	19.2083	9.54762	235.157	240.68	197.772	179.084	162.863	166.716	155.214	158.143	156.499	165.952	161.427	167.808	168.836	175.824	31.9823	43.1332	8.83871	-71.2851	-5.19979	-28.7242	-87.0104	-75.3881	12.6972	1.45265
74	CN(C)c1ncc(/C=C(\C#N)c2nc3ccccc3s2)cn1	32	17.068	208.498	6.12839	15	6	5	0	0	139.337	1090	8.64127	6.06202	4.58915	3.98105	3.53208	3.50574	3.04307	31.1429	30.3243	25.2836	20.0135	21.8605	19.907	256.963	238.624	232.359	202.039	223.996	159.891	145.46	155.597	150.651	166.448	149.741	161.516	153.376	158.61	46.6599	10.6803	-7.10884	-39.4104	-0.37415	37.0476	-3.23356	1.33787	9.18939	-1.09878
1123	Cc1nnc2n(c1=O)N=C(c1ccccc1)C2(C#N)P(=O)(c1ccccc1)c1ccccc1	18	26.0377	385.795	7.14923	24	8	5	2	0	274.354	1516	9.35899	4.44379	2.56579	5.37949	4.4611	3.72138	3.24561	29.7255	32	29.1393	28.1111	18.716	13.7434	262.619	253.682	265.369	236.684	206.979	157.558	142.802	145.731	151.547	155.943	150.882	155.51	157.244	159.162	40.6715	54.8079	109.547	89.779	-22.9333	-177.871	-252.441	-235.153	20.0557	11.381
568	Cc1nn2c(=O)c3c4c(sc3nc2s1)CCCC4	22	14.8254	104.076	5.23291	12	6	3	1	0	115.285	1166	8.30651	1.11828	0.571429	3.97533	3.27687	2.17145	1.77425	40.2069	34.9062	26.2899	29.9841	19.4194	12.2857	260.828	223.592	206.115	188.101	183.626	158.257	143.806	150.328	154.674	153.909	160.499	164.352	155.633	151.269	54.7611	66.2682	86.0156	-3.10437	-112.264	-162.557	-70.854	-24.2161	9.33056	10.4138
1398	COc1ccc(C2=NN(c3nc(-c4ccccc4)cs3)C(c3ccc(C)cc3)C2)cc1	17	24.6559	354.087	7.00094	23	5	3	1	0	147.92	1426	7.04527	4.5107	3.50269	2.73926	2.39417	2.62255	2.42568	26.4074	27.3276	20.2773	19.4109	21.2752	16.9758	245.731	218.262	189.76	212.064	228.258	156.968	142.435	148.666	152.551	155.226	158.749	155.083	152.187	153.471	63.1172	-4.40771	-58.8269	-10.9886	48.0108	6.87746	-50.373	-71.2308	13.4753	-1.23765
3932	Clc1ccc(OCc2cccc(COc3ccc(Cl)c4cccnc34)c2)c2ncccc12	6	25.432	244.005	6.66034	26	6	2	2	2	152.399	1758	8.3442	4.45125	4.26667	3.04799	2.48307	2.46011	2.57999	35.16	29.7778	25.3333	22.8333	19.1429	20.7158	269.966	239.578	204.565	197.459	214.238	155.097	140.98	146.553	150.868	155.799	155.277	155.048	153.308	150.632	37.5861	-24.0872	-2.13503	-60.1494	-78.888	-1.94376	20.0474	-30.6004	8.16	-3.48
1940	NC(CCC(=O)n1c(-c2ccc(F)c(F)c2F)nc2ccccc2c1=O)C(=O)O	14.8	22.391	386.737	7.02246	16	10	3	4	3	476.056	1344	13.2558	7.54545	6.56566	11.0711	7.01016	5.99944	6.38328	31.2558	29.8222	25.3465	24.2475	23.1616	20.4242	246.712	218.337	220.225	231.094	209.117	169.398	149.578	153.906	164.43	168.839	164.01	160.636	161.783	168.543	48.6344	74.9378	63.9091	-49.835	-64.1833	-47.6517	-44.9113	2.78637	9.22445	-1.4397
2024	CN(C)/C=C(\C#N)C(=O)Nc1ccc2c(c1)C(=O)c1ccccc1C2=O	14	20.0629	544.934	7.25618	12	6	3	3	0	279.5	1074	9.95122	5.68182	6.2807	6.81707	4.3326	4.0101	4.51949	26.1951	27.2326	23.0112	20.2376	18.1818	19.7193	251.603	241.967	214.061	193.636	192.845	158.53	144.01	150.801	149.195	158.92	155.461	161.516	159.12	155.561	54.6704	30.5628	49.7246	48.4789	-129.921	-144.938	42.1731	47.8513	11.9001	1.18501
3028	COc1ccc(-c2nc(COc3cc(=O)oc4ccccc34)n[nH]2)cc1OC	10	21.8679	205.131	6.35327	21	8	3	5	0	206.5	1204	10.4	5.825	5.79688	4.58889	3.30833	3.45104	3.44141	26.7556	28.4167	23.9885	21.6882	18.375	19.6875	240.237	232.631	179.923	173.767	168.969	160.899	146.856	154.818	154.552	156.103	161.088	162.273	168.917	165.733	67.68	8.48	-51.48	-65.12	-47.44	36.2	74.8	-47.56	12.1126	3.4163
1733	O/N=C/c1n(Cc2ccccc2)cc[n+]1-c1ccc(F)cc1	15.9	16.9586	184.746	6.00744	17	5	3	1	1	192.139	919	8.54054	4.12	3.68966	5.19294	3.23958	3.43778	3.70307	24.8378	26.5641	18.7375	17	15.5733	15.1207	237.552	206.119	188.569	183.326	162.82	163.567	147.962	153.14	158.48	160.944	161.455	159.995	165.482	164.678	22.9715	-33.3156	-39.1665	4.15413	8.2637	-23.626	21.7831	-27.2856	6.44704	-2.92549
179	O=C1C(Cl)C2(C(=O)Nc3c(Br)cc(Br)cc32)N1c1ccc([N+](=O)[O-])cc1	28	20.7827	370.035	6.86911	12	10	3	4	3	285.669	3726	12.4041	6.06061	8.42005	8.40202	3.93744	3.69415	6.24847	109.588	43.4324	43.5125	54.5765	45.0909	47	309.742	279.394	253.879	254.621	232.647	156.79	145.805	146.629	153.154	155.046	155.165	155.838	157.687	159.793	22.1324	16.4542	-32.4845	-71.6994	-45.533	-26.4635	27.7533	74.0919	7.71626	-1.55363
4391	O=c1[nH]c2ccccc2nc1NN=C1CCCCC1	0	14.8778	188.092	5.87878	10	5	4	1	0	136.639	780	7.25714	2.87755	1.91667	3.90397	3.24884	3.20408	2.68924	22.2857	24.7297	16.0575	14.3289	16.1837	13.6667	217.606	165.84	161.75	184.571	179.561	164.692	149.564	153.952	164.936	170.462	168.409	164.491	165.017	160.338	47.8261	49.5061	57.9935	22.0498	9.41469	-63.7159	-114.703	-99.3731	4.66367	-1.18776
1548	CCc1nnc2n1N=C1c3ccccc3CC1S2	16	14.647	108.6	5.27545	11	5	4	0	0	83.5868	932	7.81481	2.58333	0.75	2.78623	2.32091	2.47685	2.00463	31.0667	30.4242	24.4	21.254	14.8333	8.36111	248.292	214.945	188.239	198.742	181.386	160.654	146.457	150.683	157.589	161.665	162.782	155.666	156.618	164.116	56.0756	51.8879	-17.3136	-89.7467	-51.8756	-21.7649	-48.96	-9.80444	9.52	6.32
3234	N#Cc1c(-c2ccccc2)csc1NC(=O)c1cc2ccccc2[nH]c1=O	10	21.1893	192.834	6.25508	21	6	3	2	0	235.17	1300	9.71111	6.91111	6.49091	5.87925	4.62387	4.46816	4.57811	32.5	31.0233	24.3864	25.3146	24.7	23.8	276.436	243.309	221.535	232.382	231.6	154.464	141.875	142.858	149.656	154.579	155.177	154.9	155.396	154.972	22.5422	4.16444	3.05333	1.29333	20.5244	-26.5022	-21.1111	-26.1556	7.24188	-2.9425
646	Cc1cc(=O)oc2cc(Oc3nc(Nc4ccc(N5C(=O)CSC5c5ccc(F)cc5)cc4)nc(N(C)C)n3)ccc12	22	33.6073	862.026	8.19437	28	12	6	4	1	353.309	1992	9.94693	5.87348	5.82968	5.27327	3.50403	3.31982	3.76748	29.7313	29.6806	24.2808	21.3049	20.5474	20.2628	247.491	231.564	205.443	195.048	202.94	161.894	146.617	154.914	154.856	160.705	157.719	162.84	160.94	159.362	110.844	73.4458	-88.5354	-21.1949	-103.281	-85.1073	-37.8689	17.7065	14.6237	-0.522611
4236	CC(=O)OC[C@H]1O[C@@H](Sc2nc(-c3cc4ccccc4[nH]3)n[nH]2)[C@H](OC(C)=O)[C@@H](OC(C)=O)[C@H]1OC(C)=O	0.5	29.6239	402.18	7.3319	14	14	4	9	0	386.309	1918	10.1319	5.41712	4.94444	6.03608	3.93724	4.3516	4.46775	29.9688	29.4179	23.5571	24.2857	22.3169	19.0278	226.408	202.093	192.423	184.593	183.64	163.629	148.147	156.321	160.716	157.811	160.899	163.758	163.59	164.374	105.936	-4.99089	-214.398	4.42046	96.9288	-43.8997	-69.5791	-20.477	11.8555	6.57812
2685	COc1ccc(-c2cn3nc(Cc4noc5ccccc45)sc3n2)cc1	11	21.0514	244.227	6.45361	23	7	4	2	0	134.392	1278	9.66111	7.24306	5.6087	3.35981	2.71557	3.16024	2.98007	31.95	31.5682	24.3951	21.716	27.25	22.8043	262.12	236.104	198.222	208.247	242.807	158.028	145.084	150.106	153.449	156.433	160.524	160.386	155.739	155.322	55.0267	-4.13111	-59.2322	-78.5211	32.5622	77.9267	-8.28	-50.7711	9.34	0.57
1503	Cn1c(N2CCCCC2)nc(-c2ccco2)c(C#N)c1=O	16	16.2396	141.589	5.69487	11	6	4	2	0	177.639	880	8.54054	1.64557	1.06061	4.80105	3.40152	2.9557	2.61616	23.7838	26	18.5169	18.9438	12.7089	9.71212	223.139	186.401	200.691	170.9	153.8	164.229	148.145	159.027	161.134	168.353	159.341	162.145	162.885	162.927	70.6275	81.2286	79.6925	24.7465	-22.9525	-115.04	-165.229	-80.8342	10.7779	4.69028
2673	Nc1nc(COC(=O)C2(c3ccc(Cl)cc3)CC2)cs1	11	15.7613	302.372	6.40481	11	6	2	2	1	143.682	1288	7.88028	3.4058	2.73385	4.35401	2.67947	3.01771	2.49182	39.0303	31.7714	23.5672	19.5286	26.7826	20.2326	253.136	217.12	176.405	173.311	210.275	159.028	144.523	149.401	154.372	156.46	159.172	163.166	157.502	157.763	28.9678	1.48883	-25.7368	-88.0053	27.0294	11.8811	-24.6404	-17.7468	6.96694	-7.94215
503	COc1cc(/C=C/C(=O)c2ccc(O)cc2)ccc1OCc1nnc(-c2ccc([N+](=O)[O-])cc2)o1	23	27.1459	535.978	7.53686	23	10	3	7	0	360.556	1514	11.1481	6.93	6.27174	6.67695	3.92942	4.19444	3.84179	28.037	28.9649	22.8807	19.6667	20.54	20.1196	248.578	226.474	190.629	202.343	192.994	159.54	145.777	149.63	153.417	157.918	159.698	157.371	160.922	158.269	57.037	4.22222	-65.5802	-113.444	-38.3827	63.0247	96.4198	12.5062	8.5072	-8.06173
3378	O=C1CCCC2=C1C(c1ccc(O)cc1)c1ccc3ccccc3c1N2	9	21.1085	217.779	6.33899	16	3	1	2	0	183.778	1024	7.37778	2.9685	2.48571	4.08395	2.79982	2.60455	2.92169	22.7556	25.1633	18.6555	17.3622	13.3465	11.7048	244.613	220.23	206.074	199.954	167.397	155.819	141.154	143.6	150.822	153.247	152.815	151.554	155.96	160.608	38	10	-19	-40	-48	-75	-3	37	11.1279	2.50123
142	O=c1c(Cc2ccc(Cl)cc2Cl)nnc2scc(-c3ccc(Br)cc3)n12	29	20.701	274.651	6.57101	21	8	3	1	3	145.426	2928	9.24226	5.58429	4.04784	4.0396	3.66556	3.28488	2.60431	81.3333	40.641	35.8734	34.2911	46.5818	50.3542	310.795	267.105	240.727	250.688	267.151	153.718	141.743	144.88	150.892	155.83	154.899	156.052	155.605	150.346	28.5826	0.061576	-2.07578	2.54622	13.8536	-54.9414	-69.3423	-41.1002	4.25926	-4.88889
2196	COc1ccc(-c2nnc(S)n2NC(=O)CN(C(C)C)C(C)C)cc1	13.33	18.8389	251.442	6.4435	11	8	5	2	0	175.749	1266	6.62617	3.7019	2.25926	3.51498	2.73361	2.73824	2.80843	25.32	24.8431	19.1759	15.4275	19.6707	21.0115	204.46	186.517	140.666	127.435	184.645	166.258	150.79	161.374	163.194	161.455	166.185	174.449	164.264	158.897	101.203	53.0471	-14.3731	54.6145	80.9789	-6.30457	-21.0791	-178.571	15.0516	1.2808
278	Cc1cc(=O)oc2cc(Oc3nc(Nc4ccc(N5C(=O)C(CN6CCN(c7ccccn7)CC6)SC5c5ccc(F)cc5)cc4)nc(N(C)C)n3)ccc12	26	44.133	3065.69	9.73278	34	15	9	4	1	412.865	2512	8.80048	4.72908	4.73729	4.4394	3.08268	2.90109	3.09639	27.0108	28.03	21.6833	19.148	18.2894	18.8602	236.033	213.291	190.895	188.918	189.545	162.93	147.438	156.963	157.135	161.227	159.269	161.112	161.785	157.934	137.53	64.7714	-69.1596	-2.94179	-39.7057	-121.377	-55.729	29.556	18.9823	-2.51301
2397	Cc1nn(-c2ccccc2)c(Cl)c1/C=C/C1=Cc2c(sc(N3C(=O)[C@@H](Oc4ccc(Cl)cc4Cl)[C@H]3c3ccc([N+](=O)[O-])cc3)c2C#N)C(C)(C)C1	12.1	40.7204	2969.14	9.62527	28	13	5	4	3	391.165	3020	8.95265	5.01531	4.8394	4.95146	3.29452	3.26422	3.21032	38.2278	31.4706	27.6524	24.1324	22.9867	24.9483	267.782	246.212	229.423	231.214	223.225	157.034	142.981	147.289	150.694	155.556	152.667	153.216	154.498	153.977	102.063	41.0117	-15.2919	37.7324	-67.8384	-72.1625	-111.875	-46.1996	21.1448	-4.6406
1706	COc1ccc(C2C3CNc4c(cccc4[N+](=O)[O-])C3=NN2c2ccccc2)cc1OC	16	25.2702	364.868	7.06269	18	8	4	4	0	261.556	1338	9.07407	4.42308	4.02797	4.84362	2.94288	2.75392	2.86344	24.7778	27	21.4803	20.1736	16.4231	16.0769	234.946	223.049	195.524	187.396	181.189	161.074	147.102	152.249	154.878	158.557	158.488	157.9	159.426	158.8	69.5075	25.5432	-8.94102	-92.9136	-107.14	20.6351	66.9794	-28.2442	17.454	8.24691
3584	COc1ccc(C2CC(=NOC(=O)c3ccc([N+](=O)[O-])cc3)CC(c3ccc(OC)cc3)N2C)cc1	8	27.7721	726.878	7.86969	18	9	3	6	0	331.806	1530	8.88889	5.17333	4.40132	5.26675	2.76626	3.7837	3.1027	24.2857	26.1818	19.8881	16.1628	18.1267	16.9211	227.024	213.078	164.071	173.091	185.78	161.312	146.005	153.399	154.168	158.371	160.885	160.395	158.827	158.537	87.5986	3.63492	-83.4649	-78.2018	61.127	27.5828	30.6939	9.99773	15	-7.22222
4264	CCOC(=O)CSc1nc(NN)c2c(c1C#N)CCCC2	0	15.504	288.614	6.40703	6	7	4	2	0	187.337	1102	7.29345	3.8806	2.23333	4.80351	3.28601	4.06164	3.43889	28.2564	27.4	21.3864	22.4167	15.5821	13.6167	217.732	194.772	177.819	158.179	150.08	164.791	149.263	155.097	158.961	158.109	161.78	165.295	167.449	167.744	61.8872	56.23	-20.9883	-77.7793	-46.7678	28.5961	44.5	-73.0752	11.0401	8.7048
3519	NNC(=O)c1cn(Cc2ccc(Cl)cc2Cl)c2c(C(F)(F)F)cccc2c1=O	8	21.7828	272.007	6.63545	16	10	3	2	5	388.684	1756	12.4302	7.64815	6.94764	9.71711	6.00279	4.56281	7.11892	43.9	33.381	29.5955	29.67	30.0952	34.2184	267.453	253.722	227.19	204.543	236.798	168.823	150.154	157.952	153.75	164.637	161.812	171.166	158.867	173.814	29.9586	58.0389	29.7648	-2.29383	-56.4561	-102.782	33.3764	-14.0727	5.88	1.56
1112	O=C1c2ccccc2C(=O)N1CC(=O)N1c2ccccc2Sc2ccc(Cl)cc21	18	23.3677	207.819	6.40138	18	7	2	3	1	244.259	1640	10.0488	6.25432	6.07749	5.81568	3.46337	3.61043	3.90779	39.0476	33.1304	28.9495	26.92	24.6667	29.2368	284.715	257.464	241.715	220.48	222.635	153.517	140.752	145.446	150.384	152.667	152.687	153.419	156.575	152.107	32.7979	13.8734	9.10036	-45.9613	-30.4983	8.21254	47.6533	-61.728	8.91383	1.41043
3844	CC(=O)OCC1=C(C(=O)O)N2C(=O)[C@@H](NS(=O)(=O)c3ccc(/N=c4\sc(-c5ccc(Cl)cc5)cn4-c4ccccc4)cc3)C2SC1	6	36.5706	5918.52	10.2119	23	15	4	7	1	445.645	2842	9.56251	5.32391	5.02209	6.27669	3.663	3.83543	4.39837	40.0282	36.0658	28.0314	28.1387	25.5273	24.2048	263.217	237.415	216.861	224.748	221.468	157.561	143.199	149.283	152.889	155.598	157.614	154.949	154.415	153.873	34.1976	29.0591	-61.1427	-56.8974	-20.7715	-11.018	-58.2176	-32.0607	11.8288	-2.78457
2802	Clc1ccc2c(c1)Sc1cccnc1N2CCCCN1c2ccc(Cl)cc2Sc2cccnc21	11	27.4724	265.412	6.80506	24	8	4	0	2	135.24	2242	7.14998	2.46728	3.54614	2.50444	2.09811	1.96952	1.95114	41.5185	33.1525	27.4737	26.4179	17.3151	18.339	274.22	235.447	212.941	187.327	168.394	155.388	141.932	148.392	153.629	154.175	152.134	154.669	158.907	160.483	46.0789	19.2202	-0.726498	-108.432	-131.668	-94.1515	42.8464	144.877	10.6159	5.65158
1772	CCn1cc(C(=O)O)c(=O)c2cc(F)c(N3CCN(C=O)CC3)cc21	15	19.2464	229.275	6.35121	10	8	3	4	1	327.694	1114	9.90698	4.05682	3.34568	7.6208	4.01111	4.82386	3.88889	25.907	26.7111	20.434	18.7797	16.7273	13.7531	221.671	206.918	167.553	167.881	163.763	166.584	149.313	159.923	160.588	159.632	164.921	167.284	167.863	167.349	63.55	40.4121	11.8026	1.93997	-19.6879	-129.638	-104.101	11.6598	12.4213	2.39751
2654	N#CC1C(=N)N2C(NC(=O)C3C(c4ccccc4)CSC32)C(C#N)C1c1cccs1	11.3	23.7751	312.806	6.8442	11	8	5	1	0	246.396	1632	7.73243	3.41468	3.68254	5.02848	4.08642	3.25915	3.55162	33.3061	30.9434	21.9281	24.1218	19.2411	19.2976	255.806	218.038	202.531	182.778	178.456	158.351	143.213	146.118	153.927	156.738	156.84	162.359	162.619	157.79	23.1727	-18.5241	-29.3998	-7.19191	16.9629	16.6258	-70.552	-30.414	10.9363	-0.477718
4104	CCOC(=O)c1c(O)c(O)cc(Br)c1OC	4	11.5491	85.8774	4.92292	6	6	0	5	1	188.55	1916	9.96545	0.237417	0	6.98335	3.83686	3.00665	1.79377	70.963	33.4815	38.5625	42.1429	15.2564	6.39394	235.646	236.871	188.46	149.765	128.19	161.81	147.01	155.767	155.047	156.204	158.539	165.199	164.768	172.137	43.8957	52.4002	27.7866	-14.6817	-96.4322	-184.77	-56.9818	87.0238	10.6296	7.24829
2636	Cc1ccc(/C=C/S(=O)(=O)NC(=O)c2ccc(Cl)s2)cc1	12	16.1619	145.837	5.72443	11	7	1	3	1	217.475	1558	8.43921	4.35556	3.9009	6.59015	4.90312	4.03128	3.48173	47.2121	40.8529	27.1515	25.8154	26.9778	24.9189	269.462	218.263	203.176	219.66	202.328	155.895	140.472	146.872	151.774	158.099	157.773	155.834	158.766	153.67	-7.42097	27.6273	-55.8163	64.3099	17.0424	-2.00173	-30.3722	1.08344	1.03122	-5.76768
2141	NC(CCC(=O)n1c(-c2cc(F)cc(F)c2)nc2ccccc2c1=O)C(=O)O	14	21.6959	365.391	6.93059	16	9	3	4	2	414.278	1264	11.9535	7.42424	5.13131	9.63437	5.54719	6.46072	5.14029	29.3953	28.7556	22.5743	22.901	22.7576	18.0808	243.318	212.002	216.02	226.055	205.287	166.639	148.621	152.742	162.346	166.194	163.36	158.321	159.954	166.096	45.2201	44.8188	-13.1514	-17.57	-68.1428	-80.3807	33.675	-42.2088	7.24716	-0.366685
2601	Nc1nnc(Sc2nc3ccc(Cl)cc3c(=O)n2-c2ccc(Cl)cc2)s1	12	20.7415	225.685	6.37465	21	10	5	1	2	162.462	1984	10.1171	6.15478	4.26042	4.64177	3.58867	3.41394	3.17747	56.6857	40.6579	35.3944	36.7391	41.194	28.7344	305.442	273.578	281.044	291.695	271.594	156.731	146	147.203	152.61	155.479	152.433	148.74	152.897	157.189	20.5986	0.976064	13.6175	-24.1413	-9.38221	-42.7899	-30.26	-38.908	4.5649	0.147755
3072	O=C(/C=C/c1ccccc1Br)c1ccc(Nc2cc(=O)oc3ccccc23)cc1	10	22.7938	716.081	7.6385	22	5	1	3	1	218.634	2346	8.95705	4.64444	4.22679	4.85853	3.4955	3.42338	2.98021	52.1333	30.8958	25.93	22.8485	22.6	22.1096	272.392	233.229	208.28	215.216	214.075	153.531	140.376	142.852	150.984	153.714	153.711	152.731	152.868	153.169	29.9749	-6.3134	-31.5883	-22.3243	2.56967	-9.65549	-64.3052	-11.6114	5.14815	-6.46914
2059	Cc1nn(-c2ccccc2)c2nc(N3NC(=O)C(C#N)C3c3ccc(Cl)cc3)nc(-c3ccc(Cl)cc3)c12	14	30.3983	476.916	7.50234	27	10	7	1	2	245.233	2012	9.31947	5.94272	5.34167	4.30233	3.55882	3.1336	3.1674	35.2982	30.629	25.0672	24.0647	23.8323	24.9688	269.765	237.744	239.936	235.183	226.629	159.02	145.894	150.226	156.603	160.266	158.35	157.952	159.326	155.861	63.0094	32.8382	26.52	28.6381	-53.8168	-125.771	-83.2835	-37.7906	12.7036	2.4626
3237	Cc1cccc(NC(=O)c2cn(CCO)c3c(cc(Cl)c4ncccc43)c2=O)c1	10	22.7415	484.297	7.24741	20	7	3	3	1	245.339	1438	8.80011	4.8522	3.96552	5.21997	3.80953	4.5315	3.48747	30.5957	28.14	23.8056	23.1638	20.8019	19.1954	250.212	232.583	218.466	194.631	185.379	159.069	144.943	150.406	153.959	157.194	154.609	158.833	162.115	158.807	48.9147	25.8454	31.4076	23.1959	-52.1741	-47.9925	-74.3619	-58.6063	12.7913	6.45315
2206	CC1NN(c2ccccc2)C(=O)C1C(c1coc2ccccc2c1=O)C1C(=O)N(c2ccccc2)NC1C	13.1	30.3864	457.56	7.46091	22	8	4	4	0	306.861	1560	8.12121	3.58996	4.16667	4.64941	4.19347	2.87122	2.93673	23.6364	25.9155	19.2126	18.4124	14.6402	16.4213	233.556	204.586	201.58	187.39	170.52	160.126	145.795	150.382	157.3	159.207	157.212	159.884	161.314	156.962	79.2608	47.7888	4.03306	-90.9844	-110.668	27.4775	-84.7585	82.1267	18.281	3.8595
1151	Cc1cc(=O)oc2cc(Oc3nc(Nc4ccc(N5C(=O)C(CN6CCN(c7ccccn7)CC6)SC5c5ccc(Cl)cc5Cl)cc4)nc(N(C)C)n3)ccc12	18	44.9091	3851.52	9.97899	34	16	9	4	2	350.264	3008	8.36187	4.50827	4.42844	3.76628	2.98865	2.7742	2.71208	32.3441	29.47	23.5656	22.476	20.4681	21.1314	244.633	220.595	196.128	196.299	197.624	161.294	146.866	156.297	155.998	160.349	158.952	160.251	160.899	156.62	133.682	65.7456	-50.2974	12.0768	-39.5303	-114.958	-87.7918	-0.304515	19.0841	-1.50145
1002	N#Cc1c(-c2ccccc2Br)cc(-c2ccc(Nc3cc(=O)oc4ccccc34)cc2)nc1N	19	26.9151	328.313	7.01774	28	7	4	2	1	242.217	2538	9.43269	4.30312	4.07789	4.74936	3.4543	3.28899	2.93414	49.7647	31.2545	27.1913	25.9333	20.5877	19.7835	275.938	250.78	230.481	222.262	200.066	155.343	142.943	143.969	150.856	152.527	153.079	153.936	156.905	157.88	39.2804	11.7327	-22.8752	-23.7949	-52.8424	-64.1039	-59.3169	12.2368	10.0069	-2.4083
1377	Cc1ccc(-c2c(C#N)c(N)nc3c2CCC3)o1	17	14.1587	100.392	5.19687	11	4	3	1	0	130.694	728	8.19355	0.303571	0	4.21595	3.20896	2.42857	2.18182	23.4839	25.697	18.8551	20.3788	7.69643	4.45455	234.828	208.275	206.547	162.084	109.443	161.233	145.942	150.21	157.068	155.144	155.813	162.936	167.396	176.826	58.4277	52.8179	-18.5193	-14.0479	-76.7898	-118.85	-43.6701	22.9761	10.7815	5.80437
2181	Cc1ccc(-c2onc(-c3ccccc3)c2S(=O)(=O)NC(=O)c2ccc(Cl)s2)cc1	14	23.7167	330.42	6.89898	22	9	2	4	1	264.836	1926	9.56653	5.49769	4.42497	5.88524	5.16874	4.14508	3.45852	42.8	38.3542	30.2947	30.75	28.375	23.4742	275.774	242.069	241.883	248.428	237.73	155.19	140.931	145.443	149.598	157.134	155.165	154.364	153.577	152.426	15.1885	53.6057	-4.08008	144.751	-7.89956	-59.1885	-159.173	-102.522	7.32	2.32
3398	COc1ccc(-c2nn(CC(=O)N3c4ccccc4Sc4ccc(C(F)(F)F)cc43)c(=N)s2)cc1OC	9	29.3018	714.042	7.87927	23	12	4	3	3	409.708	2062	11.3373	6.63504	6.18329	7.31622	3.54568	4.73371	4.53258	36.8214	33.3333	30.0171	26.3383	24.6715	27.3333	259.386	258.351	219.11	209.784	198.182	164.463	146.588	156.294	153.296	157.02	159.508	158.25	164.465	169.022	67.2086	44.8458	-36.3583	-85.3016	-47.3265	63.8957	157.145	-128.041	14.0651	5.56983
2012	Sc1nnc(COC(Cn2nnnc2Cc2ccccc2)c2ccc(Cl)cc2)n1-c1ccccc1	14	27.5937	530.609	7.52679	28	10	7	1	1	174.588	1874	8.26164	5.12428	5.20623	3.06295	2.81857	2.81654	2.72997	32.8772	29.4426	21.7559	19.5252	20.9481	22.3485	250.739	211.74	193.252	193.976	199.85	161.012	147.481	152.277	157.885	160.175	162.451	164.322	162.934	160.128	66.2287	-21.2961	-66.0564	-11.7051	35.9343	-64.6148	-40.4048	25.8827	8.15359	-5.98492
915	CC1=NN(C(=O)c2[nH]nc(-c3ccc(Cl)cc3)c2N)C(=O)C1	20	17.2749	144.682	5.763	11	8	5	2	1	200.533	1178	10.0472	3.78807	3.9358	5.89803	4.2341	3.50392	3.36918	34.6471	30.3056	25.942	23.0704	21.2037	18.2667	248.693	225.471	202.317	192.529	178.114	164.394	152.125	154.288	160.858	166.424	165.596	164.84	167.063	167.398	50.5964	36.6855	-4.84523	-0.502285	-77.6954	-50.6331	-58.6991	-17.4137	9.16955	-1.61592
4152	S=c1[nH]nc(-c2cc3ccccc3[nH]2)[nH]1	3.5	12.0493	75.4879	4.72944	14	5	4	0	0	71.3193	820	8.62802	2.6	0.285714	3.10084	2.74027	2.55926	1.72222	35.6522	30.88	22.4255	18.9048	21.4	19	263.212	214.391	184.178	200.446	188.346	160.851	152.381	151.223	156.529	163.595	162.252	161.522	164.432	161.608	13.4579	-8.22873	-26.8532	-7.54862	-0.31548	-5.16824	-29.3728	7.18589	2.79962	-3.22495
2156	O=C(O)C[C@@H]1NC[C@@H]2CCCN2C1=O	14	10.8135	73.147	4.62894	0	5	2	3	0	178.611	628	7.42857	1.69231	0	6.37897	2.82906	3.75	4.46154	22.4286	23.8966	13.8228	13.2432	11	6.07692	192.237	148.724	117.067	112.771	103.933	168.173	151.248	159.317	166.752	167.637	171.78	169.276	172.784	180.19	26.8316	6.31122	-40.5867	-12.5306	10.9235	4.29082	-23.0918	-44.2602	3.89796	-2.46939
3222	O=c1[nH]cnc2nc(-c3ccccc3)cc(-c3c(-c4ccccc4)[nH]c4ccccc34)c12	10	25.9084	362.363	7.0558	31	5	4	1	0	192.056	1250	8.76	5.3	3.87162	3.84111	3.24053	3.27	3.18581	25	27.3091	21.3534	21.6695	19.72	16.3581	263.682	240.432	248.5	247.886	221.114	155.648	142.874	145.167	150.356	152.491	150.842	149.609	152.805	158.655	37.712	21.5936	36.6784	23.7632	0.7952	-15.096	-114.44	-168.565	11.648	5.9584
2784	COc1cc(/C=C/C(=O)N2C(C)CCCC2C)cc2c1OCO2	11	17.8036	204.074	6.15139	6	5	1	4	0	167.194	976	7	3.94805	3.54167	3.63466	2.34586	2.69553	2.7608	21.2174	23.75	16.4545	14.626	14.5455	16.2361	205.372	184.044	137.428	131.867	159.399	162.792	145.586	156.631	158.7	158.019	163.113	165.169	161.292	154.974	78.2722	54.3195	8.6673	-26.3459	-81.6389	34.6654	98.0888	2.49527	13.0586	3.51654
2755	Cc1cc(C)cc(-c2nnc(-c3ccccc3COc3ccc(Cl)cc3)o2)c1	11	22.1272	358.922	6.91272	23	5	2	2	1	142.561	1362	7.90649	4.69761	4.24632	3.03321	2.74581	2.7664	2.72076	28.9787	27.38	21.2551	17.9266	19.9241	19.6145	250.103	223.846	194.986	190.572	227.154	157.261	142.471	148.433	149.675	158.898	158.793	162.839	151.01	151.401	67.0634	30.9072	-3.87818	11.5287	-27.0869	-57.4443	-84.0272	-47.8172	9.54866	-2.27976
788	COc1c(F)c(F)cc2c(=O)c(C(=O)NNC(=S)Nc3ccccc3C)cn(C3CC3)c12	20.1	25.0007	2364.38	8.93142	16	10	4	3	2	351.514	1618	10.1624	4.49573	4.87266	6.75988	4.3066	4.425	4.18737	31.1154	28.7636	25.5179	24.377	18.4957	19.6854	240.622	227.892	200.687	183.603	155.216	165.453	149.294	155.836	159.434	159.697	162.42	164.311	172.821	170.19	74.6031	55.6389	91.0483	15.4346	-28.1706	-128.637	-39.8184	26.4762	14.8713	1.94231
37	O=C1NC2CCCCC2N(Cn2cnc3ccccc32)C1=O	35	17.6538	134.878	5.69283	9	6	4	2	0	185.167	918	7.75	3.95946	2.31818	4.62917	3.42992	3.47523	2.84343	22.95	25.4186	16.8036	14.3475	16.7297	13.0606	218.545	176.727	157.579	170.458	181.169	164.327	148.659	156.923	161.39	166.282	165.947	164.487	161.221	160.343	49.5575	44.1975	38.93	-46.805	-33.1425	-29.58	-63.265	-73.785	7.67	-1.49
3053	CCOC(=O)c1sc(NC(=O)c2cc(-c3ccc(Cl)cc3)n(-c3ccc(F)cc3)n2)nc1C	10	25.7602	425.835	7.24797	22	10	4	3	2	299.537	1860	10.0402	5.743	5.14746	5.87326	3.62389	4.15774	3.47383	36.4706	31.7037	26.9327	26.2427	22.8435	22.5981	258.836	230.278	229.927	227.697	203.24	161.277	145.969	152.114	159.031	157.916	157.503	154.046	159.983	163.443	74.611	47.5233	-40.9938	-50.2609	-67.5421	-10.7461	-0.474442	47.0299	11.4014	4.10727
472	O=C(CSc1nnc(Cn2cnc3ccccc32)o1)Nc1nc2ccc(Br)cc2s1	23	24.1391	298.404	6.79706	23	11	6	2	1	183.974	2856	10.185	5.67284	5.64983	4.27847	3.612	3.30607	3.15031	66.4186	38.9787	32.4023	33.0814	33.7167	36.8545	284.664	240.3	221.288	227.545	230.466	158.27	146.413	151.307	155.573	159.476	160.783	159.05	159.126	157.625	40.3589	-12.8053	-90.3405	-39.2783	45.36	21.4743	-29.2779	-21.8756	3.37966	-3.22823
3470	Cc1ccc(-c2nc3sc(C)nn3c2-c2nc3ccc(Cl)cc3[nH]2)cc1	9	21.2987	238.381	6.42938	23	7	5	0	1	117.259	1488	8.55123	4.48945	2.55556	2.93147	2.91892	2.77374	2.34581	37.2	32.2273	26.2169	23.9651	24.443	22.7436	269.983	246.015	235.54	260.024	235.12	158.241	145.619	150.255	153.773	160.443	159.048	152.872	157.596	151.689	62.5375	46.2399	19.4386	19.6032	-13.1125	-72.496	-138.878	-116.806	11.49	5.3425
3499	O=C1CCC(O)c2c(Oc3cccc4cccc(O)c34)cccc21	8	19.137	147.69	5.87058	16	4	0	4	0	213.75	992	8.7	4.81818	3.925	5.34375	2.86045	3.14574	3.71667	24.8	26.3256	20.3333	20.2165	18.2727	16.55	245.831	217.254	191.57	190.817	209.691	155.909	141.169	143.877	152.152	153.777	155.884	155.033	150.998	154.192	32.52	19.68	-2.44	-54.32	-78.72	-4.64	-2.12	-35.8	9.4375	1.75
2522	Cc1c(C(N)=O)sc2nc(C)n(NC(=S)NCc3ccccc3)c(=O)c12	12	20.1722	1117.09	7.97399	15	9	5	2	0	213.85	1514	8.34625	3.45926	3.38158	4.97327	3.64085	3.0905	2.92792	35.2093	30.6444	27.4157	24.5102	23.5467	16.9342	245.84	229.622	184.882	192.022	190.624	161.416	149.632	154.092	155.974	157.722	165.01	161.254	160.169	163.731	57.5417	29.5997	-23.6202	-19.517	-85.7366	-17.6726	-38.7198	10.2422	12.8107	3.46133
2361	COc1cc(-c2nc3sc4c(c3c(=O)n2C(=O)NO)CCCC4)cc(OC)c1OC	13	23.1489	315.916	6.85409	15	10	3	6	0	270.976	1528	9.49891	5.17188	4.22222	5.31325	3.70771	3.71648	3.90408	29.9608	29.4259	26.2909	26.041	21.3281	20.5526	230.356	235.208	203.927	197.258	177.214	162.214	147.422	155.813	153.089	154.999	159.477	159.294	164.428	160.416	91.5943	83.6965	128.046	22.6037	-128.191	-108.585	18.4371	-107.357	22.3772	18.8685
1399	N#CSc1c(-c2ccccc2)nc2sc(Cc3noc4ccccc34)nn12	17	21.6777	285.585	6.64779	23	8	5	1	0	157.812	1516	10.2865	6.7963	6.44928	4.15296	3.18367	3.4449	3.48182	39.8947	35.9286	29.0886	30.3896	28.8889	27.413	289.875	251.71	255.436	255.296	248.421	155.25	143.205	145.73	151.93	155.904	156.344	153.137	154.623	154.193	36.2315	-0.22253	-7.87319	-41.755	-0.773469	28.1425	-24.0859	-50.426	7.44598	3.15443
2188	c1ccc(-c2nnc(-c3cn(-c4ccccc4)nc3-c3ccccc3)o2)cc1	13.6	22.4252	287.785	6.69183	28	5	4	1	0	142.694	1104	8.90909	5.86905	4.48315	3.24306	3.19653	3.17989	2.8633	25.0909	27.6667	20.266	21.2283	21.1548	17.9326	259.724	219.64	229.145	240.459	233.171	156.94	144.035	146.857	153.851	160.508	159.02	154.155	153.577	155.76	46.2686	35.7397	43.7893	23.0413	-21.7128	-74.2645	-101.087	-105.626	8.04132	1.33058
1267	COc1ccc(-[n+]2noc(O)c2CNc2nc3c([N+](=O)[O-])cccc3s2)cc1	18	22.0058	259.649	6.58895	20	11	5	5	0	274.198	1447	11.3439	6.52857	6.8125	6.52852	3.71232	3.46852	3.94661	34.4524	33.0222	26.881	24.4348	22.8	24.8281	250.721	232.975	195.542	189.937	198.589	162.741	150.95	153.898	157.528	162.641	161.1	163.861	162.736	161.519	46.1988	25.3794	-18.127	-79.4575	-30.0128	20.3422	43.3192	-27.3323	10.1565	1.51701
4263	CCOC(=O)CSc1c(C#N)c2c(c3nncn13)CCCC2	0	16.8373	354.037	6.65786	9	7	4	2	0	180.087	1136	8.38012	5.65455	2.21569	4.73913	3.77895	4.66448	2.82843	29.8947	29.125	23.125	24.9765	19.3455	14.7647	232.971	208.983	191.509	169.601	173.981	162.731	146.451	154.22	156.685	155.59	160.581	166.269	164.59	161.514	75.638	74.3844	-16.4641	-62.0031	-61.7562	-5.84118	35.8707	-72.8264	11.6731	11.6593
2634	COc1ccc(-c2nnc(-c3sc4ncnc(N5CCCCC5)c4c3C)o2)cc1	12	23.1608	439.8	7.15103	20	8	5	2	0	150.17	1406	8.16889	4.01347	3.4053	3.0034	2.65568	2.41592	2.54489	28.12	28.6852	22.4779	21.0083	18.9697	16.8409	235.855	212.313	194.582	195.296	184.813	161.608	146.332	155.443	155.609	159.205	162.695	157.955	158.448	161.716	92.8052	82.8478	44.389	-19.5963	-86.5396	1.56124	39.6043	-71.1088	15.9104	9.5344
1951	COc1ccc2[nH]cc(Cc3nn4c(-c5ccoc5C)nnc4s3)c2c1	14.49	21.08	238.202	6.42863	22	8	5	2	0	136.42	1292	9.57182	5.37705	5.53552	3.32732	2.67601	2.68033	2.66029	31.5122	31.2667	25.1358	21.9545	22.5902	19.082	252.09	238.523	189.037	209.717	210.741	160.744	147.957	153.192	153.593	156.367	164.449	160.528	155.8	162.477	68.1433	10.7167	-68.2824	-24.4382	26.4396	-90.2411	5.16095	61.7761	13.5068	3.57644
4485	O=C(NOCc1ccccc1)c1cc(Br)cc(C(F)(F)F)c1	0	16.8569	403.306	6.78815	12	7	1	2	4	321.335	2196	12.3354	6.67901	5.001	9.73743	8.21667	5.23082	3.67534	66.5455	34.5	28.4478	27.1571	24.9762	27	260.767	221.224	204.595	195.924	200.771	168.739	147.666	157.866	156.172	170.512	169.751	174.124	166.404	151.249	22.7225	34.3484	22.0428	-3.96037	-15.5585	20.6112	-0.302985	-28.9905	-0.561983	-5.27273
3577	COc1ccc(-n2c(S)nnc2-c2csc(N(C(C)=O)C(C)=O)n2)cc1	8	20.0629	217.09	6.33582	16	10	5	3	0	216.447	1540	9.99398	6.96953	6.06433	5.2792	2.7238	3.65601	4.14862	37.561	32.7674	29.8267	31.6071	27.3548	28.1579	251.264	248.955	205.078	183.743	208.351	161.7	147.993	157.07	158.951	154.385	158.246	161.297	162.397	162.395	88.7158	36.74	-97.6585	-60.9861	-26.3108	49.3379	59.9056	-81.0331	14.8269	6.50327
352	COc1c(F)c(F)cc2c(=O)c(C(=O)NNC(=S)Nc3ccccc3)cn(C3CC3)c12	24.2	24.2246	2492.04	8.95226	16	10	4	3	2	346.736	1580	10.6213	4.61261	5.02008	7.07624	4.491	4.5716	4.30399	32.2449	29.5	25.6792	25.8091	18.964	20.012	245.442	225.474	212.292	188.45	156.88	165.448	149.579	155.525	160.909	159.678	161.936	164.093	172.346	170.975	57.8126	40.1772	103.357	17.8104	-64.5816	-147.558	-46.2589	17.0913	11.5677	1.81216
1412	O=c1c2cc(I)ccc2nc(Cc2ccccc2Nc2ccccc2)n1NC1=NNC(c2ccc([N+](=O)[O-])cc2)C1	17	32.6814	863.533	8.17202	28	11	7	3	1	331.412	4448	9.18499	5.2438	5.18908	5.09864	3.06895	3.17987	3.34559	68.4308	31.7571	24.6452	22.5706	22.4477	24.4624	259.402	217.914	202.427	214.568	204.878	159.786	147.69	149.529	157.606	161.043	160.582	158.586	159.465	158.364	53.2124	4.36361	-28.1355	-25.266	-6.04549	-55.2083	-29.2061	-40.35	8.47811	-8.95716
4360	COc1cc(C(=O)/C=C/c2ccccc2)cc(OC)c1OC	0	16.2515	265.248	6.36912	12	4	0	4	0	168.417	922	8.1	2.54217	3.03077	4.21042	3.3581	2.90696	2.6359	23.05	24.878	21.5479	18.7683	11.988	13	226.209	226.682	174.593	168.871	144.891	158.816	142.886	153.081	149.596	152.76	158.885	157.166	162.838	160.444	55.2525	-1.185	6.4325	-46.095	-77.1775	-51.1925	4.0075	19.0625	12.36	2.96
4204	COc1ccc(-c2nc3sc(-c4ccc(F)cc4)nn3c2-c2nc3ccc(Cl)cc3[nH]2)cc1	2	26.8058	444.581	7.29105	29	9	5	1	2	212.064	1814	10.2927	7.64469	6.22222	4.41801	3.20505	3.27794	3.25718	37.7917	33.0943	28.0495	26.8627	28.5165	28.6237	277.946	253.626	238.665	254.818	261.235	159.115	145.23	149.561	154.663	158.733	158.182	156.994	154.495	152.32	50.3646	-0.568759	-27.9708	-6.12397	36.4901	-18.456	-63.5004	-86.4961	10.4501	2.74566
143	O=C1NC2CCCCC2N(C(=O)/C=C/c2ccccc2)C1=O	29	17.0965	331.856	6.59316	6	5	2	3	0	226.917	920	7.75	3.78333	3.5	5.67292	4.14865	3.55833	3.12644	23	24.7381	16.3578	15.2315	16.1	16.2069	222.377	175.386	165.84	167.965	182.203	161.571	145.423	151.769	160.595	162.898	162.595	162.694	159.588	154.96	43.305	48.3375	67.5725	6.72	-52.37	-133.215	-57.7	-28.855	5.845	-1.6625
283	COc1ccc(/C=C(\C#N)c2ccccc2C#N)cc1	26	14.7684	123.536	5.50968	12	3	2	1	0	162.639	786	8.75	4.83721	4.09756	5.08247	4.24109	3.6053	3.45528	24.5625	26.1818	20.2381	18.1818	17.8605	15.0976	258.619	238.853	198.842	201.454	209.088	155.701	140.211	145.427	147.728	151.715	156.321	158.508	152.457	159.396	30.3125	-14.0625	-21.5625	-13.375	22	-22.1875	-15.3125	15.5625	7.28516	-1.95703
801	O=C(OCC(F)(F)F)[C@H]1C[C@H](C(=O)c2ccc(Cl)cc2)N2N=CC=C[C@@H]12	20	20.3613	289.738	6.62449	6	9	2	3	4	381.568	1448	12.0901	5.66792	6.31327	9.53919	4.24173	4.52809	5.31729	36.2	30.7381	22.02	21.1875	21.2584	23.3056	245.147	199.612	194.861	185.342	181.293	170.05	148.157	159.136	164.901	161.108	161.987	165.659	171.929	172.616	37.7845	19.1243	-66.4574	-42.0307	66.2672	11.2727	-64.8487	-17.864	0.375	-5.375
668	Cc1ccc(C2C(C#N)=C(N)OC3=C2C(=O)CC(C)(C)C3)s1	22	17.3739	134.817	5.69237	5	5	2	2	0	185.205	1112	7.21111	0.97037	0.378378	4.63012	3.77518	2.91029	2.45683	27.8	27.1905	20.5556	17.4844	12.3778	8.56757	231.887	219.614	204.54	193.063	144.931	159.618	143.367	148.382	148.073	160.734	157.389	154.05	162.917	166.298	62.8228	40.1264	40.4553	81.1411	-140.406	-61.7197	-170.331	-27.5294	13.445	0.9875
1174	Cc1cccc(N2C(=O)CSC2c2cc3ccccc3nc2S)c1	18	19.1774	172.474	6.02571	16	5	2	1	0	143.447	1374	7.34383	2.97545	2.78268	3.58618	2.78818	2.56716	2.53912	34.35	30.2326	24.9889	24.8571	17.3488	15.9265	261.018	237.519	221.926	208.282	182.721	154.759	140.503	145.915	150.218	153.407	151.603	152.147	155.154	155.767	50.9936	6.92494	-55.563	-20.9323	-27.8365	-12.3096	-12.5437	-5.07309	9.9375	0.75
807	C[C@H]1CC[C@@H](C(C)(C)O)C[C@@H]2C1=C[C@H](O)[C@@H]2C	20	13.3095	80.4946	4.91882	0	2	0	2	0	137.979	694	3.53488	0.343137	0	3.20882	2.1149	2.44199	1.61765	16.1395	18.9091	12.626	8.92308	5.48039	1.97059	176.598	164.543	109.541	105.157	80.9458	164.667	145.016	152.013	155.649	161.469	166.209	166.728	169.991	184.014	34.4002	-0.465116	-62.0135	-40.2006	15.1006	-30.3807	-8.73607	32.8891	11.3348	-6.04651
3484	Cc1nn(C(=O)COc2ccc(Cl)cc2Cl)c2c1nnc1cc(Cl)c(F)cc12	8.32	22.2531	644.989	7.49885	19	10	4	2	4	228.488	1930	11.8109	6.16264	6.03373	6.01285	4.90521	4.25383	3.84469	50.7895	36.1951	35.6875	33.5641	27.8841	33.6607	290.24	264.09	233.902	222.567	211.806	161.983	146.873	152.044	160.33	162.015	160.212	162.432	164.736	161.648	52.868	17.7938	-48.948	-45.0484	8.94378	-10.3698	-3.31374	-78.0047	7.24377	-0.941828
842	N#Cc1c(-c2ccco2)nc(=S)[nH]c1N1CCN(Cc2ccccc2)CC1	20	21.1608	408.497	7.00574	17	7	5	1	0	158.347	1304	7.74879	2.52805	2.95359	3.44233	2.73101	2.50559	2.23629	28.3478	27.449	19.0273	18.4333	14.3267	13.9241	241.101	200.15	189.207	180.912	155.562	160.833	147.064	155.759	158.038	160.016	160.125	159.1	164.848	160.829	48.3919	-6.92922	22.9217	73.9093	-8.1674	-107.188	-69.4087	10.6881	7.76134	-1.13894
1943	COC1(O)C(=O)c2ccccc2OC1(OC)c1cn(-c2ccccc2)nc1-c1ccc(Cl)cc1	14.67	26.8276	507.816	7.4539	23	8	2	5	1	246.908	1664	9.22918	4.31471	3.39753	4.48924	3.42633	3.08959	2.97775	30.2545	28.6271	26.9194	24.4789	18.9106	17.3667	249.759	242.589	215.332	209.84	197.922	158.142	143.94	150.023	152.639	156.532	157.39	156.242	156.406	156.406	70.2611	70.2227	107.337	-57.1019	-172.844	-149.356	-110.974	-87.8969	21.6598	8.43868
611	O=C(CSc1nnc(Cn2cnc3ccccc32)o1)Nc1ccc(I)cc1	22	21.3511	1138.86	8.03103	20	9	5	2	1	173.915	4100	9.49924	5.07111	5.89582	4.24183	3.41317	2.89549	3.44348	100	37.9545	31.5476	24.4167	38.0364	44.4255	277.118	225.786	203.219	212.997	222.15	158.898	146.785	151.769	156.451	160.847	160.771	159.765	159.58	158.432	41.1731	-10.9245	-93.8013	-22.1149	41.7685	60.3506	-11.9111	-55.4423	3.23617	-5.32124
2478	CC1=NN(c2ccc(-n3c(-c4ccccc4)nc4c(Br)cc(Br)cc4c3=O)cc2)C(=O)C1	12	25.6388	348.579	7.01701	22	8	4	2	2	223.073	3654	9.41947	4.40262	4.53757	4.64736	3.21196	2.69554	2.68536	76.125	35.0962	32.4312	41.2793	28.5948	30.3143	280.721	249.094	252.925	240.554	216.466	156.182	143.452	148.349	154.897	157.3	152.581	150	152.67	156.698	62.6358	40.8481	2.83857	-22.9826	-148.209	-114.361	33.8746	93.7968	10.9444	2.05556
3420	Cc1nn(-c2ccccc2)c2c1C(c1ccccc1)C(C#N)=C(N)O2	9	19.6942	228.339	6.34712	17	5	4	1	0	164.722	996	8.4878	2.5619	2.03571	4.01762	3.53016	2.87937	2.41071	24.2927	26.6591	21.5978	20.9406	12.7238	10.3571	247.74	231.074	220.828	202.935	157.824	159.146	145.707	148.096	153.549	157.253	156.275	156.362	162.966	163.584	54.4313	42.6681	9.64902	-6.78882	-83.0648	-161.563	-57.0024	51.1249	13.5931	7.20999
3329	Cc1ccc(-c2nn(-c3ccccc3)cc2C2CC(c3ccccc3)=NN2c2ccc(S(N)(=O)=O)cc2)cc1	9.33	31.3542	494.299	7.56412	29	8	5	2	0	276.133	1772	7.73401	4.9078	4.17302	4.18383	2.60189	2.86082	2.79862	26.8485	30	20.0774	18.8313	20.0957	18.2619	245.673	216.335	201.233	220.66	220.584	158.452	144.149	148.382	154.214	158.055	159.155	153.221	153.994	154.451	41.7051	47.733	-58.6325	-30.8199	-2.13846	13.2087	-48.7099	-102.751	13.0287	-3.27158
4181	COc1cc(C2CC(c3cc4ccccc4o3)=NN2C(=O)Nc2cccc(O)c2)ccc1O	3	26.2485	416.759	7.22643	21	8	3	5	0	269.556	1388	9.37037	5.96094	5.24242	4.99177	3.92801	3.5549	3.40215	25.7037	27.4138	21.1983	19.4688	19.7969	18.4015	241.714	215.714	189.219	207.94	204.045	159.52	146.038	149.927	156.005	158.54	161.548	159.066	159.144	156.796	53.3882	4.7476	-57.7106	-45.2442	-36.1934	41.7202	0.459534	7.95885	12.0466	-3.1238
1018	CC1=C(C)C(c2ccc([N+](=O)[O-])cc2)C2C(=O)N3NNNC3NC2N1	19	19.982	235.856	6.37951	6	10	7	3	0	264.028	1094	9	2.90179	3.67059	6.00063	2.79746	2.84921	3.26732	24.8636	26.9362	19.5431	16.9203	13.1786	13.9059	211.266	199.818	156.459	152.311	135.288	169.327	157.43	160.443	161.429	163.771	165.189	167.273	171.134	177.036	50.3285	18.6983	-58.5702	-21.2066	6.6405	-44.4112	-26.9174	29.126	12.171	-2.1219
4142	COc1ccc(-c2nn(-c3ccccc3)cc2C2CC(c3ccc(SC)cc3)=NN2c2ccccc2)cc1	4	30.1225	544.936	7.63567	29	6	4	1	0	179.698	1696	7.06734	4.72464	3.87908	2.7227	2.41921	2.61541	2.56074	25.697	27.0704	20.1633	18.9494	19.5435	17.3235	245.596	221.147	199.434	212.263	220.269	157.164	143.134	148.469	153.332	155.49	158.001	153.873	152.145	154.868	82.1067	27.2318	-48.7539	-36.1905	39.9369	41.5333	-37.5527	-117.375	17.5537	2.59504
3758	COc1ccc2nc(Nc3ncccc3C(=O)N3CCNC(Cl)C3Cl)sc2c1	7	22.0058	198.278	6.31929	15	10	5	2	2	172.292	1872	8.30343	4.37203	4.02766	3.82871	2.84418	2.72807	2.67574	41.6	32.7917	29.2871	26.6733	24.2247	25.7089	253.462	224.282	210.103	217.021	203.561	162.148	148.46	157.174	159.143	159.923	160.165	159.429	162.058	159.913	46.0873	2.25605	-1.28176	-28.0669	12.0827	-31.0461	-39.8546	-2.23758	8.8237	0.899753
479	CC1(C)CC(=O)C2=C(C1)Nc1nc3n(N)c(-c4ccccc4)cn3c(=O)c1C2c1ccc([N+](=O)[O-])cc1	23	30.0375	512.57	7.54777	21	10	6	4	0	363.424	1546	9.40984	4.81034	5.26452	5.95776	3.70175	3.33317	3.45735	25.3443	27.2121	21.3418	18.0303	17.6609	19.1355	237.81	226.487	208.612	205.234	188.737	161.815	148.217	150.958	152.246	162.509	159.752	158.891	162.226	157.648	88.2128	77.7971	66.0505	106.852	-138.386	-97.7764	-136.603	-28.6149	17.9191	-0.13921
4164	Oc1ccc(O)cc1	3	5.87563	22.2278	2.8782	6	2	0	2	0	99.5556	350	8.42857	0	4.12264	7.11111	6	1	3.10306	25	25.1429	16.24	9.1	1	19.184	225.742	169.941	70.2629	82.0136	31.0837	160.084	146.451	145.268	157.672	169.096	177.911	185.184	184.918	159.627	-1.14286	-13.5918	-31.2041	-1.02041	27.7551	-12.2449	4.59184	0	0.857143	-4.04082
2477	Cc1c2c(cc3occc13)[C@@]1(C)CCCC(C)(C)[C@]1(O)[C@H](OC(=O)c1ccccc1)C2	12	25.0883	646.363	7.60276	15	4	0	4	0	222.41	1258	6.45902	2.60104	1.85955	3.64606	2.44427	2.961	2.56476	20.623	23.2923	18.657	14.641	14.1244	12.1292	216.935	213.628	147.444	147.164	168.245	159.226	141.89	148.311	149.537	155.96	160.566	162.241	157.872	156.344	100.414	81.1948	-37.1169	-121.091	-0.837409	43.0016	-194.073	-161.21	27.4547	0.100511
888	O=C(NCc1ccccc1)Nc1c(-c2cccc(F)c2)nc2ccccc2c1O	20	22.7534	767.181	7.70743	22	6	3	2	1	267.75	1202	9.19149	5.35238	4.66327	5.69681	4.06155	4.24339	4.06236	25.5745	26.84	20.4623	19.6355	18.8381	17.2857	247.663	215.196	206.738	208.077	194.25	160.701	145.568	148.61	156.297	161.022	160.967	159.153	160.945	160.708	30.6279	6.97057	-0.46718	3.11091	32.0928	-60.0987	-55.4921	-22.8153	7.53599	-1.50837
102	Cc1cc[n+](CC(=O)c2ccc(O)c(O)c2)cn1	30	13.7917	95.3791	5.14565	12	5	2	3	0	189.917	771	8.58065	3.64444	3.88571	6.12634	4.3794	3.27778	4.04127	24.871	26	20.0156	14.9706	15.0444	15.8286	227.278	204.526	154.77	194.537	160.679	162.293	147.743	154.229	156.134	161.463	167.546	157.189	164.09	163.536	27.5973	-10.2799	-60.0635	-20.1259	46.1103	-4.41415	3.91051	-33.2237	5.60978	-7.64308
4154	CC(=O)OC[C@H]1O[C@@H](Sc2nc(-c3cc4ccccc4[nH]3)n[nH]2)[C@H](OC(C)=O)[C@@H](OC(C)=O)[C@@H]1OC(C)=O	3.25	29.6239	402.18	7.3319	14	14	4	9	0	386.309	1918	10.1319	5.41712	4.94444	6.03608	3.93724	4.3516	4.46775	29.9688	29.4179	23.5571	24.2857	22.3169	19.0278	226.408	202.093	192.423	184.593	183.64	163.629	148.147	156.321	160.716	157.811	160.899	163.758	163.59	164.374	105.936	-4.99089	-214.398	4.42046	96.9288	-43.8997	-69.5791	-20.477	11.8555	6.57812
3974	CC(C)n1c(S)nnc1Sc1nnc(-c2ccccc2)n1-c1ccccc1	5	21.2583	215.087	6.36429	22	8	6	0	0	130.419	1508	7.72785	4.16546	3.13832	2.89821	2.88179	2.83121	2.59912	33.5111	30.5	25.5625	26.1765	22.3696	18.1122	250.217	222.344	218.463	235.483	220.335	160.438	146.977	152.848	156.748	159.322	160.904	155.53	159.014	158.17	77.3595	49.9265	3.81633	24.4746	-3.29909	-37.4363	-139.824	-153.278	13.4133	7.54667
1306	CCCCCCCC/C=C\CCCCCCCC(=O)N(C(=O)NC1CCCCC1)C1CCCCC1	17.2	25.5533	130283	13.0302	0	4	2	2	0	239.361	1398	3.05495	0.908367	0.72963	2.63034	2.24285	1.97045	1.725	15.3626	18.337	9.49811	10.0623	9.6494	8.43704	173.507	125.921	133.481	139.179	133.163	165.708	145.885	155.069	164.773	165.921	165.811	163.196	162.478	163.33	58.2968	47.3184	70.3397	47.9211	-66.2021	-104.269	-94.1785	-43.2971	7.69279	-1.69327
2862	O=C1CCc2ccc(O)c(c2)-c2cc(ccc2O)C[C@@H](O)C(O)[C@H]1O	10.67	19.5056	168.336	6.04225	12	6	0	6	0	304.528	1088	8.13333	3.41259	2.92	6.76728	3.57864	3.63131	4.21167	24.1778	24.9787	19.1008	16.55	13.8322	11.39	221.485	199.907	175.918	178.345	145.887	160.448	144.798	146.665	154.206	157.876	158.332	157.407	161.911	168.779	12.1595	-20.7086	-25.9205	-32.9235	-8.15407	-82.1299	-6.02864	47.5753	8.65284	-9.81975
4235	CCCCCCCCn1cc(COc2nc(-c3ccccc3)nc3nc(C(F)(F)F)ccc23)nn1	0.7	27.1639	8050.69	10.2463	21	10	6	1	3	355.257	1528	9.12903	6.44615	4.84615	5.72995	3.04379	3.89605	3.32885	24.6452	25.9692	17.5517	17.1458	20	18.1308	219.913	176.466	183.686	185.985	188.634	169.777	149.453	160.232	164.151	169.069	166.006	164.598	165.273	165.692	115.06	212.777	209.035	116.542	113.572	93.7107	140.992	2.18522	8.77966	7.86889
1366	COc1ccc(/C=C/C(=O)c2cc(Cl)c(Cl)[nH]2)cc1OC	17	15.7632	127.836	5.59268	11	6	1	3	2	147.816	1372	8.62382	4.41929	4.75758	4.34753	2.77253	2.92682	3.15313	40.3529	30.7143	31.4677	20.9077	18.6604	24.5227	254.626	241.916	180.85	173.473	175.053	159.111	144.843	152.811	152.277	154.143	159.163	158.573	162.168	158.534	40.3116	-13.007	-35.7337	-58.2746	-54.281	27.8079	73.0778	31.4761	8.69291	-2.07958
2763	Cc1ccc(OCc2ccccc2-c2nnc(Cc3cccnc3Cl)o2)cc1	11	22.0178	314.409	6.78031	23	6	3	2	1	146.033	1374	8.33924	4.97481	4.02747	3.17463	3.02816	2.74213	2.55856	29.8696	28.0612	21.625	18.7596	19.96	17.7416	250.947	219.985	190.809	219.282	225.205	158.495	143.758	149.859	152.423	159.4	163.255	157.785	149.92	157.851	58.0618	1.76721	-44.7641	14.4024	24.2646	-51.6267	-16.6343	0.542043	7.59546	-4.33837
1959	Cc1nn(C(=O)c2ccc([N+](=O)[O-])cc2)c2c1nnc1cc(Cl)c(F)cc12	14.18	21.5056	334.58	6.80613	19	10	5	3	2	326.366	1428	13.9335	7.69865	5.59316	9.06573	5.093	5.94058	4.04818	39.6667	34.1538	31.8571	27.9	27.0152	22.0923	278.508	262.514	244.249	251.36	226.893	164.001	149.473	151.331	158.833	164.709	162.866	157.391	157.339	165.291	51.5011	45.9287	-37.0399	-112.649	-88.2024	-53.5232	32.1815	55.1914	7.77083	-1.39583
3017	Brc1ccc(-c2nnc(NC34CC5CC(CC(C5)C3)C4)s2)cc1	10	19.1608	397.551	6.81823	11	5	3	0	1	93.3109	2296	5.4305	3.23718	2.38249	2.17002	2.11676	2.29214	2.15295	53.3953	30.2979	17.9556	14.0479	26.5385	19	238.956	177.77	166.72	180.891	221.161	159.564	143.58	147.463	156.013	165.412	164.506	164.775	156.043	151.814	36.9275	-9.63295	12.7395	70.6136	12.3597	-20.1733	-62.8921	-82.8147	3.73012	-9.20011
3966	COc1ccc2nc(Nc3ncccc3C(=O)N3CCN(CCO)CC3)sc2c1	5	22.575	347.5	6.91547	15	9	5	3	0	213.865	1436	7.77778	4.1521	4.23551	4.11278	2.78425	2.78515	3.19998	27.6154	27.8727	20.0336	18.8594	17.8544	19.2391	223.996	197.109	166.057	178.487	182.013	163.632	148.802	158.983	160.236	160.277	164.293	163.465	163.005	158.666	54.8243	-6.84895	-1.25888	3.81657	44.0986	-8.03994	-41.987	-18.6091	11.8976	2.24963
3487	O=c1oc2ccccc2cc1-c1csc(N2N=C(c3ccc(Cl)cc3)C[C@@]2(O)C(F)(F)F)n1	8.1	26.6589	497.113	7.40274	21	11	3	3	4	396.856	1932	12.8272	7.74444	8.70096	8.6273	4.99279	4.99429	5.38044	42	34.86	30.0094	28.7207	29.3	30.5432	276.793	242.893	235.77	240.935	228.116	164.557	145.923	153.586	159.75	166.48	160.386	160.13	167.009	163.806	40.7536	70.0004	12.7137	-51.9796	10.8332	-31.118	-67.4055	-22.9822	5.41682	-7.54112
2089	COc1c(C(=O)O)c(O)c(S(N)(=O)=O)c2occc12	14	14.6024	99.0389	5.23737	9	9	1	7	0	300.049	1122	13.2302	0.428571	0	10.7161	8.38419	3.49921	4.35714	40.0714	40.8276	35.1887	38.0656	8.65714	6	245.348	265.496	196.576	125.982	83.8931	162.462	148.111	152.752	150.526	154.859	158.457	172.597	178.27	183.216	5.79819	55.2721	-43.093	50.8481	-167.1	-43.483	41.2222	-21.5397	10.3125	10.375
250	COc1ccc(C2C(C#N)c3ccccc3C(=N)C2(C#N)C#N)cc1	26	18.8759	236.177	6.38087	12	5	4	1	0	233.007	994	9.28205	4.84615	4.44898	5.97454	5.03966	4.16966	3.87245	25.4872	26.9512	22.6	21.036	16.9538	16.2245	258.85	254.418	207.216	188.218	181.536	157.824	141.762	144.331	148.021	152.548	157.1	162.608	163.078	160.908	33.7962	-12.0066	-10.1427	2.79093	29.1538	-47.3465	-47.4957	44.8271	14.7469	1.85536
1474	COCCn1c(S)nnc1-c1cnc2c(C(F)(F)F)cccc2c1NC1CCCCC1	16	24.2831	373.54	7.05443	15	10	5	1	3	325.59	1588	9.1147	3.72676	3.65286	5.91981	3.27017	2.84906	3.25734	28.8727	27.3103	19.7426	19.2416	18.283	18.0807	221.832	193.332	196.582	203.354	183.66	170.188	149.751	160.719	160.948	167.316	164.679	161.694	163.927	166.442	93.9039	143.231	129.139	125.071	17.6764	-153.608	-176.753	-88.9386	12.194	10.921
4490	COC(=O)c1c(C)nc(C)c2c1C(=O)C=C(NC[C@H]1O[C@@H]3OC(C)(C)O[C@@H]3[C@H]3OC(C)(C)O[C@H]31)C2=O	0	28.9816	516.945	7.52887	6	11	2	9	0	337.014	1604	9.18182	3.17021	4.37908	5.10627	3.36434	2.96336	3.18627	24.303	26.0714	21.2147	19.3386	13.5	15.6928	211.433	206.07	171.232	153.326	143.9	163.772	146.509	157.137	159.532	158.02	161.379	163.707	166.087	161.628	151.731	85.3921	-147.093	40.4766	-80.2103	-201.178	-44.1607	131.231	23.4444	12.7778
1970	CCCCCNc1nc2c(-c3cccc(F)c3)nc3ccccc3c2o1	14	20.4133	614.759	7.37674	19	5	3	1	1	187.722	1068	8	4.14607	2.45556	4.08092	3.18834	3.22846	2.77593	23.2174	25.3673	17.8519	18.6275	17.9101	14.0889	231.281	191.157	204.054	205.726	196.348	162.69	145.463	152.35	160.79	162.036	161.486	159.676	158.426	159.865	77	116	126	68	-11	-88	-109	-125	11.2344	12.9112
3711	Cc1ccc(C2NC(=O)C3CNN(c4ccc([N+](=O)[O-])cc4[N+](=O)[O-])C3N2)cc1	7.5	22.9602	282.846	6.70961	12	11	6	5	0	377.556	1280	10.6809	5.10185	5.61458	8.0331	5.50617	3.90175	5.04398	27.234	28.44	20.5083	18.8806	18.1111	18.5417	228.184	200.782	177.21	182.464	174.81	166.075	153.49	155.932	160.78	167.05	165.882	163.879	166.332	165.634	47.756	29.0303	-28.5048	2.00905	58.1775	59.0797	-50.6351	14.7239	8.32322	-5.00951
1122	CSc1ccc(Cc2nnc3sc(-c4ccc(-c5ccc(Cl)cc5[N+](=O)[O-])o4)nn23)cc1	18	25.5414	444.538	7.26019	25	11	5	3	1	245.707	2008	10.5325	6.36438	6.52991	5.34145	3.53075	3.10551	3.21247	43.6522	36.24	30.1828	26.6364	32.4559	32.8923	280.267	253.95	216.4	228.178	249.896	157.541	145.448	147.644	152.298	155.504	159.968	159.483	155.087	156.016	64.0499	54.5486	-12.4921	28.6129	51.0384	-41.5327	-34.7629	18.4729	8.80718	-0.143667
4276	Cc1cc(=O)[nH]c(/C(=N/Nc2cccc(Cl)c2)C(=O)c2ccc(Cl)cc2)n1	0	20.9317	230.745	6.43457	18	8	4	2	2	211.122	1600	9.2978	5.43434	4.08392	5.14931	4.51464	3.69746	3.28955	39.0244	31.0465	25.6706	24.6707	24.0795	24.6277	265.755	228.132	226.005	238.46	229.729	159.759	146.674	150.246	158.327	162.302	162.674	159.464	158.03	154.044	39.8392	8.46964	5.16112	36.2011	-45.4815	-45.4601	-123.116	-71.4353	4.77751	-4.22308
386	CC(C)[C@H](NC(=O)c1cc(-c2nc3cc([N+](=O)[O-])ccc3[nH]2)ccc1O)C(=O)N[C@@H](Cc1ccccc1)C(=O)N[C@@H](Cc1c[nH]cn1)C(=O)O	24	38.9137	5305.3	10.1859	26	16	8	8	0	574.75	2162	9.47619	4.704	4.46038	6.84226	4.17926	3.90378	3.95776	25.7381	26.8068	19.2772	17.9471	18.096	17.1019	227.786	195.857	186.442	194.57	184.551	163.949	149.935	153.098	159.371	164.647	163.594	161.044	160.507	162.188	80.8458	54.1281	-47.2868	-34.3101	77.7812	-31.8044	-121.256	-63.394	13.288	-11.8209
1683	COc1ccc(/C=N/NC(=O)c2cc(Cl)c[nH]2)cc1OC	16	15.6942	112.221	5.46241	11	7	3	3	1	159.478	1146	9.07443	4.06289	5.65278	4.5565	2.87562	2.92657	3.67582	32.7429	28.9167	25.0323	20.3538	16.283	21.775	235.643	218.267	165.027	164.219	158.61	163.491	150.169	157.571	157.016	161.417	166.188	162.188	166.297	163.561	41.4939	-12.8495	-21.5351	-53.2442	-67.5979	49.6965	42.0651	-5.44928	8.17469	-1.72816
3391	CCCCCCCCO[C@@H]1C[C@H](O)[C@@H](O)[C@H](C)O1	9	12.9752	872.565	7.35922	0	4	0	4	0	157.611	788	4.17391	0.894118	0.871795	3.42633	1.82246	1.94608	2.00214	17.1304	19.3913	11.2764	9.89167	8.63529	8.61538	166.634	125.885	107.6	112.719	112.471	167.274	147.677	157.531	165.818	167.103	168.496	166.415	166.7	167.441	28.3913	13.1928	13.397	-16.3932	-14.4499	-3.65217	-9.81474	-13.1947	5.43478	-2.569
1005	O=C(/C=C/c1ccccc1O)C1C(=O)NC(=S)NC1=O	19	15.2344	154.124	5.73091	6	7	2	4	0	249.625	1088	10.8148	7.18421	7.22807	8.32083	4.83469	4.61404	6.73424	36.2667	30.7097	24.2727	26.1311	24.5789	25.5	258.851	219.745	183.41	207.852	218.36	158.971	147.049	147.893	155.564	159.409	160.382	158.078	155.555	161.646	9.8642	-19.0617	-25.6667	33.4938	-17.9753	13.1358	1.54321	-9.5679	2.80444	-5.91556
3209	Clc1ccc(OCc2ccccc2-c2nnc(-c3cccc4ncccc34)o2)cc1	10	23.9488	548.996	7.4067	27	6	3	2	1	152.561	1444	9.16532	5.76768	5.07582	3.31654	3.00022	2.86711	2.84694	31.3913	29.42	22.9192	21.44	21.8442	20.9176	268.01	234.411	203.54	219.376	242.296	155.968	142.366	146.554	151.415	155.464	161.245	157.221	149.475	151.22	43.2435	9.38535	6.03876	-18.9198	-16.6119	-40.1654	-40.7078	-42.78	7.25142	-1.6673
3777	CCCCc1nc(Cl)c(-c2cc(-c3cc(OC)c(OC)c(OC)c3)nc3c2C(=O)c2ccccc2-3)n1Cc1ccccc1	7	33.6342	928.315	8.29199	29	8	3	4	1	256.228	1984	7.83473	4.42707	4.41921	3.41637	2.89875	2.60448	2.68815	26.4533	26.4	22.5602	21.75	19.6708	19.1633	238.897	231.478	217.905	229.222	207.497	158.651	143.115	151.78	152.361	154.28	156.322	152.635	154.893	155.448	127.404	103.352	116.985	24.1535	-57.3434	-62.2557	8.31868	-4.67923	29.2969	25.0281
4167	N#C/C(=N\Nc1ccccc1Br)c1nnn[nH]1	3	12.7564	80.1753	4.91484	11	8	7	0	1	124.995	1898	11.8725	7.26519	4.5475	5.43456	3.8708	4.54981	4.02697	82.5217	39.25	38.725	36.2703	51.6	39.1304	278.468	233.482	224.501	266.961	254.492	168.213	159.1	157.545	163.117	170.655	172.281	157.507	162.802	175.139	17.7012	2.05846	17.6422	35.9834	8.70651	-11.5491	-42.0785	-44.4213	2.42155	-4.24575
449	O=C1CCSC(c2ccco2)N1CCCNc1ccnc2cc(Cl)ccc12	23.83	21.2298	171.346	6.13694	15	7	3	2	1	164.425	1560	7.14999	2.28098	3.64028	3.49841	2.39273	2.13669	2.29205	33.1915	29.3	21.2301	20.7611	12.8365	17.125	241.606	198.572	176.692	152.818	141.036	159.88	144.949	151.893	158.587	158.321	157.975	160.743	164.753	163.52	49.1987	11.7895	-45.0038	-85.8514	-60.1704	-39.4374	37.8274	61.4117	7.33001	-0.259393
1693	Nn1c(S)nnc1-c1ccccc1O	16	10.773	62.0202	4.46393	11	6	4	1	0	110.666	812	9.51403	0.0877193	0	5.03027	3.05917	1.88954	1.17813	36.9091	31.4783	27.9268	20.9286	10.6842	3.85714	246.51	224.319	182.608	156.973	103.082	165.065	155.153	154.848	157.929	166.214	169.541	167.37	167.358	174.084	25.5332	10.6084	-20.9184	-37.4671	-28.8292	-54.5851	25.8111	30.1096	6.71074	-1.83471
3557	Cc1ccc(C2=CC(c3c(-c4ccccc4)[nH]c4ccc(C)cc34)c3c(nc[nH]c3=O)O2)cc1	8	27.5414	410.759	7.24178	27	5	3	2	0	204.861	1342	8.03509	4.92135	3.68927	3.59405	3.05381	3.06742	3.08192	23.5439	26.0645	20.5299	18.8278	18.6685	16.5367	248.415	233.918	224.271	233.326	211.276	156.75	142.849	146.711	148.752	154.687	152.591	150.76	153.596	156.511	69.7922	40.7839	-4.19945	34.5152	49.5679	16.0249	-86.6593	-181.46	16.0496	4.51493
146	Fc1cc(-c2nc3scc(-c4ccc(Br)cc4)n3n2)c(Cl)cc1Cl	29	19.2868	193.916	6.14289	20	8	3	0	4	151.176	2870	10.733	6.03567	5.68575	4.87663	3.0732	2.88443	3.19297	92.5806	44.1471	42.5156	41.1864	64.6389	49.303	329.322	284.973	265.037	285.547	314.973	156.246	142.879	146.218	152.843	158.723	160.284	154.294	147.419	147.363	21.6894	4.16991	-16.8121	-8.40839	5.08446	-15.1551	-35.5482	-10.3854	2.64828	-4.13736
1582	Cn1cc(CCCNC(=O)CCc2c[nH]c3ccc(Cl)cc23)c2cc(OC(F)(F)F)ccc21	16	26.0586	2152.2	8.86817	18	9	3	2	4	368.373	1694	9.45723	4.50097	3.26646	6.5781	3.07511	3.47372	3.77899	30.25	27.6949	18.8846	17.2553	17.8246	17.9259	233.521	202.542	163.251	155.297	165.307	167.493	148.145	158.392	156.187	159.603	164.262	167.066	166.964	170.868	74.901	115.424	-60.2943	-76.9977	15.8899	106.028	62.0363	-135.852	6.25861	1.5456
1514	CSc1ccc(-c2csc(N/N=C/c3cc(Cl)cc(Cl)c3Cl)n2)cc1	16	19.2987	160.945	5.99735	17	8	3	0	3	100.745	2150	7.28929	4.72896	4.19529	2.72284	2.30939	2.60452	2.52195	58.1081	38.9744	36.8857	33.1143	42.5909	43	297.519	266.285	204.038	218.109	266.385	154.794	142.422	145.952	150.18	154.832	160.109	158.024	154.438	152.961	31.391	3.57536	-26.6846	-15.8418	23.4509	5.44731	-12.308	-29.7355	5.90431	-4.28342
2456	CCOC(=O)c1nc(N)sc1Sc1nc2ccc(C)cc2c(=O)n1-c1ccccc1	12	23.489	318.972	6.86371	21	9	4	3	0	237.118	1674	8.97685	6.07443	5.01502	4.93996	3.638	3.33621	3.94467	34.875	32.0392	28.1224	31.84	25.8544	21.1532	255.611	240.993	248.568	249.678	242.514	158.483	144.902	150.705	153.642	154.028	153.716	153.761	149.203	155.203	67.7431	71.9622	46.6312	-42.2191	-46.6474	-105.635	-1.88349	-14.8032	14.6875	11.9375
2503	O=S(=O)(c1ccccc1)C1C(c2ccc(Cl)cc2)=NOC1c1ccc(C2ON=C(c3ccc(Cl)cc3)C2S(=O)(=O)c2ccccc2)cc1	12	38.4683	607.187	7.97745	30	12	2	6	2	391.221	2894	8.94728	4.8343	3.6596	5.28677	3.82097	3.36871	2.65662	39.1081	36.45	27.5508	26.5248	23.891	20.9364	270.828	236.077	227.334	223.619	226.937	154.846	139.403	143.118	150.37	154.843	153.809	154.242	151.323	152.565	-3.86733	1.95688	-20.4072	97.1854	32.2342	-205.431	-218.166	-42.0115	10.5391	-6.3214
4355	O=c1[nH]c2ccccc2nc1N/N=C1\CCCCC1Br	0	15.6538	163.231	5.78831	10	6	4	1	1	136.3	2004	7.40192	3.09448	2.07948	3.8943	3.21637	3.20298	2.67818	57.2571	30.2432	24.2644	21.9342	30.7551	22.875	236.816	182.19	175.222	200.359	201.315	163.396	149.021	152.961	163.617	168.579	166.807	163.532	163.581	158.995	44.7953	47.3568	52.0625	17.0143	13.3215	-55.628	-112.824	-99.1506	4.28327	-2.35102
3644	COc1ccc2c(c1)CCC1=C2N=c2s/c(=C\c3c[nH]c4ccc(C)cc34)c(=O)n2C1c1cccc([N+](=O)[O-])c1	8	32.4792	636.943	7.84297	26	9	4	4	0	321.865	1848	9.22569	5.85799	6.18376	5.02913	3.22328	3.23073	4.19842	28.875	29.2143	23.634	20.8539	22.071	22.5705	254.854	243.656	220.054	217.309	212.848	157.23	143.551	147.838	148.61	154.519	153.989	154.245	155.496	156.015	78.9	33.5686	-32.7525	-58.8974	-17.3089	-0.692491	89.6242	-13.4345	18.6484	4.65625
2325	ClC1=C(Cn2cc(-c3ccccc3)nn2)CCOc2ccccc21	13	19.0395	173.712	6.03287	17	5	3	1	1	115.478	1200	7.74012	4.26736	4.28758	2.88694	2.45814	2.4682	2.52602	30	27.9535	21.7979	21.4227	16.6562	20.3333	249.862	218.606	187.262	171.752	177.96	158.878	144.772	150.06	153.923	158.911	162.182	163.309	163.006	154.096	42.8948	-9.54914	-28.7081	-55.1985	-43.6237	1.50667	29.9585	-8.85728	6.6875	-2.5
1916	Ic1cccc(-c2nn3c(-c4cccc(-c5nnc6sc(-c7cccc(I)c7)nn56)n4)nnc3s2)c1	15	29.5937	408.432	7.29326	34	13	9	0	2	162.274	7410	10.9987	8.94912	8.42441	3.45265	3.31538	3.51248	3.42268	157.66	47.283	44.9278	43.956	47.2368	48.9859	331.503	280.875	288.891	284.281	280.919	154.992	145.87	147.512	152.452	156.454	156.519	157.522	158.768	154.924	41.2076	11.06	73.3697	51.3332	-29.8348	-69.4415	-59.1682	-47.6868	5.40697	0.186962
1873	NC(=S)N/N=C\c1cn(-c2ccccc2)nc1-c1cccs1	15	17.068	241.103	6.27368	16	7	5	0	0	113.239	1310	7.73968	3.85484	2.70185	3.23541	2.69131	2.80914	2.50742	37.4286	32.0811	23.2836	24.3906	25.6935	23.85	261.913	215.384	230.728	216.697	214.852	159.334	149.375	149.924	156.576	160.915	155.378	155.576	156.614	158.143	22.9546	-2.48299	2.52834	-9.53061	-22.6281	-38.8322	-28.6916	-50.805	5.70367	0.0261224
[truncated: 2,242 more rows]
[truncated: 152 more columns]
