# Supplementary material for: QSAR Models for Active Substances Against <em>Pseudomonas aeruginosa</em> Using Disk-diffusion Test Data
Source: Preprints.org preprint supplement (doi:10.20944/preprints202102.0147.v1), 2021-02-04
Supplement: Supplementary file 1 [file supplementary › Supplementary materials/Table S2. External_validation_dataset.xlsx]

## Sheet: SetValidareExterna
	SMILES	IZ	ABC	VR1_A	VR3_A	nAromAtom	nHetero	nN	nO	nX	ATS0s	ATS0Z	AATS0dv	AATS7dv	AATS8dv	AATS0s	AATS6s	AATS7s	AATS8s	AATS0Z	AATS1Z	AATS3Z	AATS4Z	AATS7Z	AATS8Z	AATS0v	AATS3v	AATS5v	AATS6v	AATS7v	AATS0i	AATS1i	AATS2i	AATS3i	AATS4i	AATS5i	AATS6i	AATS7i	AATS8i	ATSC1dv	ATSC2dv	ATSC3dv	ATSC4dv	ATSC5dv	ATSC6dv	ATSC7dv	ATSC8dv	ATSC1d	ATSC2d
3270	Cc1ccc(-c2nn3c(-c4cccc(-c5nnc6sc(-c7ccc(C)cc7)nn56)n4)nnc3s2)cc1	10	29.5937	427.328	7.33849	34	11	9	0	0	174.174	1870	9.79036	7.90152	7.41365	3.28629	3.29139	3.36293	3.30522	35.283	33.5254	28.5688	24.4522	28.4773	28.1205	273.58	251.129	231.409	264.22	248.014	159.043	146.916	150.58	153.264	159.49	161.423	157.744	160.673	158.384	84.9659	51.0827	54.3571	117.694	37.2979	-67.4175	-39.8116	-81.2587	14.1289	2.49591
2701	Nc1nc(COC(=O)c2cc(F)cc(C(F)(F)F)c2)cs1	11	16.2592	172.588	5.89284	11	9	2	2	4	387.149	1246	15.6705	7.09677	6.98148	13.35	9.05408	5.05406	5.52581	42.9655	36.2667	28.2453	25.5789	29.1613	25.8611	260.525	232.222	225.604	191.282	239.315	176.407	151.701	163.208	162.135	172.769	177.437	176.681	161.974	175.508	25.8282	41.8785	-42.2102	-56.8589	98.5641	34.4384	-47.0408	-39.7846	-0.646849	-3.73841
4444	COC(=O)c1c(C)nc(C)c2c1C(=O)C=C(NC[C@H]1O[C@@H]3OC(C)(C)O[C@@H]3[C@H]1O)C2=O	0	24.571	222.428	6.536	6	10	2	8	0	331.174	1390	9.67273	3.94444	4.78095	6.02134	3.97273	3.57914	3.81164	25.2727	26.5345	22.0462	19.7448	14.9762	16.4952	215.593	209.439	170.208	160.593	149.564	163.76	147.044	156.654	159.322	158.53	162.595	162.847	164.332	166.305	110.318	67.8579	-77.0496	-26.2413	-109.102	-102.941	29.9931	43.4579	19.8668	9.57355
1626	N#Cc1ccc(-c2ccc(-c3ccco3)o2)nc1	16	14.0613	110.995	5.29727	16	4	2	2	0	129.639	738	11.1538	7.07407	5.125	4.98611	3.06944	4.15844	3.74306	28.3846	29.7857	22.1837	23.0465	22.1111	18.3333	272.974	223.565	215.331	199.195	221.251	155.686	142.059	146.123	154.922	156.362	154.38	154.489	156.69	156.989	22.0355	-8.92899	-26.2071	-41.0059	-32.5976	33.142	7.09467	-28.8047	3.5858	-3.75148
2905	O=Nc1c(-c2ccccc2)nc2sc(Cc3noc4ccccc34)nn12	10	20.9706	263.214	6.52848	23	8	5	2	0	173.142	1288	11.0931	7.7551	8.4	4.67952	3.63497	3.85412	3.91296	34.8108	33.4878	26.2564	26.6	27.0612	24.925	275.983	239.907	236.109	233.074	235.441	158.13	145.834	147.69	155.32	159.141	159.946	160.523	159.371	155.468	45.3333	18.2222	28.4444	-36.7778	-42.1111	-20.8889	-26.2222	-7.11111	7.48576	2.21768
1196	O=c1cc(COc2cccc(O)c2)c2c(ccc3ccccc32)o1	18	19.1489	347.732	6.7269	20	4	0	4	0	191.972	990	9.57895	5.42029	5.75862	5.0519	3.16306	3.39855	3.95594	26.0526	27.561	21.1294	19.4253	18.2899	20	257.134	232.181	197.803	192.881	198.04	154.383	140.452	143.926	149.363	151.69	154.535	154.863	155.979	152.505	28.4598	-7.98892	-33.5152	-15.9806	-30.0416	15.9252	26.8393	-58.2853	6.29086	0.0304709
326	O=C1/C(=N\N2C(=S)NNC2CCc2ccccc2)c2cc(Cl)ccc2N1CN1CCOCC1	25	26.208	956.738	8.05745	12	10	6	2	1	192.213	1820	7.34568	3.67793	2.97752	3.31403	3.09581	2.86647	2.37761	31.3793	28.0323	20.1448	17.6225	21.1824	21.4897	232.955	191.946	188.185	209.848	194.752	162.984	149.542	157.87	160.757	162.972	162.782	159.142	160.273	163.534	59.5884	-4.15083	14.0179	45.0214	38.5321	-101.689	-169.871	-69.0677	10.085	-0.308561
908	CCSc1nnc(NC(=O)c2cc(-c3ccccc3)nc3ccccc23)s1	20	21.1608	335.976	6.81029	21	7	4	1	0	167.562	1508	8.16021	4.76707	3.84167	3.8968	3.20415	3.13893	2.9571	35.0698	32.1304	23.6966	24.9412	24.1566	22.225	263.974	229.005	229.068	229.799	221.125	156.736	143.26	146.757	152.86	154.01	155.302	154.375	155.593	156.92	50.687	55.6138	45.4673	-20.5994	-3.29457	-77.1418	-46.9221	-36.9243	9.18551	6.30449
4266	O=c1ccc2nccc3c4ccccc4n1c23	0	13.9684	96.8953	5.10426	16	3	2	1	0	118.667	674	10.16	0	0	4.74667	3.2735	2.2	1	26.96	28.9286	23.6897	22.3393	4.3	1	275.237	255.449	205.704	149.814	75.2261	154.496	141.848	145.454	151.603	150.829	152.451	160.615	173.499	184.918	23.5008	12.7456	-3.6912	-46.8384	-43.9136	-26.4096	13.312	26.2144	7.1392	4.9744
2486	NC(=S)n1nc(Nc2nc(-c3ccc(Cl)cc3)co2)cc1-c1ccc(Cl)cc1	12	22.1961	278.586	6.65935	22	9	5	1	2	139.802	1840	9.06474	5.20129	5.14568	3.40981	3.01276	3.04849	3.07311	44.878	33.5	27.4286	26.0241	29.7391	30.85	280.21	241.12	216.159	219.09	216.286	158.496	148.08	149.989	155.77	157.226	160.354	160.774	161.352	160.337	32.7485	6.13763	-22.5179	-10.5069	-22.2508	-18.9787	18.9597	-46.3383	5.16062	-4.42772
954	COc1ccc(Cc2nnc3sc(-c4ccnc(F)c4)nn23)cc1OC	19.26	20.4537	301.242	6.66343	20	9	5	2	1	199.392	1336	10.8611	6.45238	6.01212	4.98481	3.19679	3.22231	3.50297	33.4	32.1395	28.0133	22.9759	21.1	24.0182	251.453	245.855	195.397	197.02	182.357	164.558	148.907	157.133	156.098	158.089	163.792	163.728	165.818	164.933	65.0756	-0.4	-52.5111	-55.5467	-53.8889	59.9111	145.8	9.17778	11.52	3.8
2697	O=C(Nc1nc(-c2ccccc2)cs1)c1[nH]ncc1-c1ccccc1	11	19.7466	203.363	6.23128	22	6	4	1	0	161.365	1214	8.67806	5.26316	5.12	4.13755	3.32762	3.29142	3.27333	31.1282	30.3571	21.7	24.0633	21.4386	22.1	263.293	223.031	209.957	205.298	207.133	157.325	145.117	146.922	153.203	156.775	158.763	161.219	159.474	156.109	23.5378	-5.35634	2.71941	6.46227	-4.47724	-26.9055	-7.09796	-25.8951	5.99803	-1.78698
2898	C#CCCN1CCN(C(=O)c2cc(-c3ccc(Cl)cc3)n(-c3ccc(F)cc3)n2)CC1	10	24.1676	560.438	7.46012	17	7	4	1	2	249.005	1516	8.06802	4.50522	3.82261	4.69821	3.17901	3.3626	3.15022	28.6038	27.125	19.4803	17.2296	20.2393	18.7719	239.979	200.324	182.825	200.894	200.482	162.517	146.627	155.481	160.586	160.558	162.201	158.557	158.99	157.589	60.2109	4.35772	-8.16063	22.2162	34.5136	-36.0188	-83.3312	-83.8116	9.00926	-3.76041
765	O=C(NS(=O)(=O)/C=C/c1ccc([N+](=O)[O-])cc1)c1cccs1	21	16.8286	124.386	5.61185	11	9	2	5	0	326.664	1408	11.5903	5.17054	5.5619	10.2083	5.60054	4.94035	3.97328	44	42.2121	27.4062	28.7869	22.5581	30.1143	268.084	216.855	210.693	216.348	196.364	158.184	144.136	146.988	154.644	159.736	157.896	157.954	160.701	157.525	-7.45443	39.467	-44.9653	-0.601997	-17.5569	-11.5595	-77.2001	-28.0438	-0.9375	-7
2919	O=P(O)(NN1CCCCC1)Oc1ccccc1	10	13.0458	89.6662	5.02672	6	6	2	3	0	158.625	928	6.45025	1.47917	1.02128	4.66544	3.69038	2.60764	1.8156	27.2941	31.7429	16.369	17.6053	11.9375	9.85106	203.52	148.845	150.931	149.906	155.799	165.504	149.153	158.534	167.011	166.437	168.679	168.073	161.831	157.706	-6.88346	55.7009	10.4129	52.0841	-44.2048	-85.5252	-76.988	-17.6905	1.16522	-1.28547
2155	Clc1cccc(-c2nn3c(-c4cccc(-c5nnc6sc(-c7cccc(Cl)c7)nn56)n4)nnc3s2)c1	14	29.5937	408.432	7.29326	34	13	9	0	2	163.795	2370	11.0234	9.09649	8.58216	3.485	3.34407	3.55187	3.46485	50.4255	39.1321	34.5361	33.6703	34.9211	35.8028	307.96	270.019	278.216	275.399	271.336	157.5	146.939	148.861	155.032	158.452	158.771	159.105	160.477	156.752	41.2715	9.75601	68.2412	49.438	-34.403	-66.7716	-56.4828	-44.4531	5.40697	0.186962
4406	OC[C@H]1O[C@@H](Oc2ccc(O)cc2)[C@H](O)[C@@H](O)[C@@H]1O	0	14.4179	128.833	5.50037	6	7	0	7	0	253.194	896	8.97143	3.48333	2.87037	7.23413	3.85726	3.76852	3.93004	25.6	25.9444	19.6705	16.1685	14.8	12.4444	202.694	168.357	142.795	158.134	151.826	165.096	149.586	153.254	162.896	166.533	167.31	162.769	161.158	166.945	-5.15837	-34.1461	-3.73633	-40.1518	3.13306	-23.4939	-0.616327	11.591	5.76	-6.24
1205	CC(C)CC1=NNC(=O)C1Sc1ccccc1	18	12.9752	106.35	5.19737	6	4	2	1	0	122.809	902	5.89226	1.47273	0.525	3.72148	3.03317	2.98788	2.13333	27.3333	26.5294	20.4054	14.76	11.0727	8.85	221.299	181.165	195.786	160.219	138.403	161.281	145.33	150.825	156.49	162.183	158.148	161.876	165.575	159.218	35.3417	13.2209	2.25548	51.1999	-32.9155	-57.9512	-80.5466	-36.7125	5.72544	-0.44169
737	CCN1CCN(c2nc(Nc3ccccc3)nc(Oc3ccc4c(C)cc(=O)oc4c3)n2)CC1	21	26.9675	426.194	7.27867	22	9	6	3	0	221	1412	8.26667	5.99074	5.15	3.68333	3.23776	3.26286	3.08588	23.5333	26.0781	18.6643	17.0268	21.4444	20.0833	225.086	196.841	162.434	188.746	213.458	163.359	148.324	158.658	159.984	161.737	168.214	165.994	164.67	156.87	104.304	92.2556	25.6222	80.7322	34.4311	-13.7689	-148.847	-83.5	12.16	2.4
4516	CC1(C)O[C@@H]2[C@H](O1)[C@H]1OC(C)(C)O[C@H]1O[C@@H]2CNC1=CC(=O)c2ccccc2C1=O	0	24.5726	619.124	7.52692	6	8	1	7	0	254.653	1314	8.69091	3.58571	4.65323	4.63005	2.81672	2.76488	3.14628	23.8909	25.9492	19.226	16.9051	14.1857	15.8387	215.5	190.646	158.24	153.121	152.124	162.215	145.354	154.429	160.141	159.687	163.4	163.298	164.286	160.268	99	32	-146	27	-56	-137	32	161	13.1094	1.36364
3027	OCCCC1CCN(c2c(-c3nnc(S)n3Cc3ccccc3)cnc3c(C(F)(F)F)cccc23)CC1	10	29.1924	762.343	7.94473	21	10	5	1	3	372.117	1808	8.66629	3.92554	4.01123	5.72488	2.96838	2.83985	3.38743	27.8154	26.8841	19.1325	18.2995	18.6649	18.367	228.71	198.236	193.477	185.257	186.434	167.089	147.587	157.226	157.781	163.922	161.048	165.077	162.456	166.715	87.5508	128.909	116.363	137.688	75.7055	-109.2	-120.267	-117.641	12.6864	8.16568
4221	O=C(CC(Nc1ccccc1)c1ccccc1)c1cc2ccccc2o1	1	20.4942	318.862	6.72027	21	3	1	2	0	167.194	1024	7.37778	4.07619	3.61856	3.71543	3.24002	3.06085	2.73883	22.7556	25.1458	17.1429	15.7619	16.2571	15.134	244.613	197.481	190.671	200.989	191.621	155.819	141.339	144.974	154.58	156.87	155.869	153.805	154.409	155.966	31	-13	-31	-17	29	0	-30	-35	5.5837	-4.98469
3821	CCCc1nn(CC(=O)N2c3ccccc3Sc3ccc(C(F)(F)F)cc32)c(=N)s1	7	23.7258	399.624	7.08914	17	10	4	1	3	363.375	1752	10.5296	6.44753	5.1156	7.73138	3.64207	5.18236	4.36988	37.2766	33.04	26.6698	25.3091	24.9167	26.101	253.47	229.687	227.651	209.354	201.268	166.707	147.37	156.647	157.935	160.781	160.023	159.791	165.167	171.092	63.3844	108.672	52.8567	-30.0012	-27.2096	-8.30376	56.3557	-76.6486	9.31326	7.89
1982	C/C(=N\Nc1nc2ccccc2[nH]c1=O)c1cc2cc(Cl)ccc2oc1=O	14	21.4486	205.701	6.31967	20	8	4	3	1	219.339	1374	10.5901	6.23958	6.79211	5.48347	3.97841	3.98582	4.2838	34.35	30.7674	26.1047	23.1765	24.9219	22.4194	264.433	236.901	195.939	214.028	210.515	159.562	146.849	150.206	157.02	161.499	162.667	160.367	162.309	159.541	47.7893	32.0283	-14.8351	-50.2747	-40.6643	-84.1019	-39.5551	63.9842	7.06687	-3.61187
965	CCOC(=O)c1sc(-c2cc(-c3ccc(Cl)cc3)n(-c3ccc(F)cc3)n2)nc1CC	19	24.1272	321.343	6.90391	22	8	3	2	2	244.759	1748	8.96099	4.64799	4.04406	4.89517	3.37014	2.94614	2.71878	34.96	30.5849	25.9333	26.1485	22.7731	19.6293	255.44	224.849	233.6	232.729	211.58	160.267	144.096	150.918	158.598	156.427	152.973	153.335	156.714	158.406	80.0485	68.9703	-15.5112	-51.9769	-80.8949	-75.7285	-5.04521	25.048	13.3628	9.3888
1145	Cc1cc(=O)oc2cc(Oc3nc(Nc4ccc(/N=C/c5ccccc5Br)cc4)nc(N(C)C)n3)ccc12	18	30.0837	1754.16	8.80475	28	10	6	3	1	241.217	2742	9.19782	5.73527	5.15352	3.95438	3.43758	3.11691	3.10877	44.9508	30.2	26.2441	22.3188	24.2348	20.5968	252.227	231.705	201.865	213.43	222.153	160.11	146.306	154.956	153.735	162.269	160.587	162.241	157.539	156.195	96.0044	66.4432	-24.5758	1.52918	-84.8894	-89.8752	-74.6005	16.2874	12.4222	-2.405
2947	c1ccc(-c2nnc(C34CC5CC(CC(C5)C3)C4)o2)cc1	10	17.5756	247.765	6.25442	11	3	2	1	0	98.9792	830	6	2.37736	1.6875	2.41413	2.43386	2.21069	1.86328	20.2439	23.7556	13.7252	10.993	15.1887	12.0938	218.244	170.742	154.493	176.493	204.286	160.697	143.191	147.756	154.612	168.091	166.843	165.621	151.054	152.913	53.5152	46.9976	35.762	32.6788	-53.1053	-102.484	-96.4057	-36.05	6.48899	-5.91315
4265	N#Cc1c(SCC(=O)c2ccccc2)nc(NN)c2c1CCCC2	0	18.292	378.793	6.81246	12	6	4	1	0	191.615	1182	7.24868	4.46667	3.92647	4.56225	3.27466	3.71963	3.45833	28.1429	27.6364	21.2929	21.7041	16.3467	16.2941	237.363	208.164	186.462	175.273	173.363	160.68	146.013	149.172	154.477	157.516	159.918	162.524	163.369	160.811	47.129	35.356	-3.08012	-77.843	-55.6122	11.2454	75.8057	-18.0161	10.2222	3.33333
3325	O=C1NC(c2cccc(O)c2)NC2C1CNN2c1ccc([N+](=O)[O-])cc1[N+](=O)[O-]	9.5	22.9602	275.478	6.68322	12	12	6	6	0	407.556	1306	11.6889	5.92233	6.5	9.05679	5.62806	4.48166	5.71086	29.0222	29.6667	21.25	20.2619	19.5049	20.3409	232.341	201.102	184.47	179.375	177.544	166.541	154.726	155.588	162.055	167.644	165.424	165.935	165.21	167.255	26.8726	10.436	-32.6005	-25.3289	28.0148	61.2627	-16.478	-26.5077	5.92593	-5.7284
2489	Cc1c(C(N)=O)sc2nc(C)n(/N=C3\SCC(=O)N3Cc3ccccc3)c(=O)c12	12	22.9198	546.186	7.36767	15	10	5	3	0	267.118	1650	9.41063	4.54195	3.53608	5.80691	4.09278	4.12718	2.94705	35.8696	32.6327	29.5579	25.9519	23.7041	18.0619	252.925	240.362	211.012	217.568	198.896	160.433	147.038	152.813	155.603	157.335	162.51	157.578	158.561	162.882	76.071	47.5283	-58.0546	-11.8368	-80.6683	-37.3867	-78.7179	16.2987	14.9976	4.60208
2955	COCCn1c(S)nnc1-c1cnc2c(C(F)(F)F)cccc2c1NCCC(C)(C)C	10	24.0527	416.011	7.16211	15	10	5	1	3	332.624	1590	8.7598	3.79861	3.54777	5.83551	3.22899	2.97569	3.37418	27.8947	26.4407	20.4308	16.8	19.0486	18.1083	215.139	203.077	181.696	189.718	192.105	170.705	150.255	162.627	157.077	169.405	168.01	164.988	162.185	162.83	112.472	140.646	122.989	237.724	34.7132	-109.315	-167.473	-108.549	15.0874	5.5454
4419	Cc1nn(-c2ccccc2)c2nc3c(nc12)/C(=N\NC(N)=S)c1ccccc1-3	0	22.5916	344.277	6.87106	21	8	7	0	0	146.708	1334	9.12661	4.14286	3.25094	3.41182	3.18626	2.83762	2.64239	31.0233	29.5957	25.1319	23.6044	20.7143	17.9326	261.316	239.084	245.878	240.47	208.085	160.364	149.26	151.164	158.428	159.825	158.184	155.573	157.461	157.668	60.853	62.294	58.9254	-23.7878	-86.1239	-116.85	-111.162	-64.1161	13.8734	10.1071
155	Cc1cc(SCc2nnc(-c3ccc(Br)cc3)s2)nc(SCc2nnc(-c3ccc(Br)cc3)s2)n1	29	27.8245	256.49	6.79985	28	12	6	0	2	149.004	4612	8.19436	4.09768	4.58796	2.92164	2.6407	2.13615	2.46709	90.4314	43.6727	41.0606	36.2525	39.6044	32.4	303.765	264.61	246.961	262.616	228.608	153.938	141.638	145.153	149.47	154.511	153.983	150.799	154.867	154.502	51.0196	-15.8119	-57.05	-77.7731	-19.7246	17.4331	96.2513	22.5379	5.07882	-3.8935
4286	COc1cc(-c2nc(NC(=O)NO)c3c4c(sc3n2)CCCC4)cc(OC)c1OC	0	23.1608	345.922	6.94483	15	10	4	5	0	234.226	1514	8.93162	4.08397	4.20649	4.50434	3.2698	3.00457	3.29359	29.1154	28.9091	24.8	23.8583	19.3053	19.6991	227.042	226.804	200.045	196.556	171.643	163.147	148.523	156.316	154.611	155.496	160.35	159.836	164.693	161.274	86.7079	63.9408	80.3859	-24.2301	-109.067	-50.0702	-17.8979	-104.624	19.9763	15.8225
3431	Cc1ccc(NC(=O)c2cn(CCO)c3c(cc(O)c4ncccc43)c2=O)cc1	9	22.7415	509.236	7.29762	20	7	3	4	0	280.528	1214	9.125	5.09091	4.09677	5.84433	4.08476	4.92121	3.99881	25.2917	26.6863	21.8455	20.5083	18.1545	16.0968	239.656	226.055	206.06	190.638	175.103	159.967	145.875	150.612	154.243	157.957	155.139	159.806	162.494	162.549	47.6875	28	35.875	41.25	-27.875	-92.4375	-41.875	-84.1875	13.8242	5.32812
3761	CC(C)(C)C(=O)Nc1nnc(-c2ccc(N3CCC(c4ccc(C(F)(F)F)cc4)CC3)c([N+](=O)[O-])c2)s1	7	29.2405	375.758	7.23728	17	12	5	3	3	487.573	1862	9.94356	4.95664	5.26349	7.73925	3.21994	3.91576	4.45988	29.5556	28.5455	20.3077	17.0052	19.5366	23.1524	228.409	202.856	175.35	169.605	183.228	168.385	148.993	157.173	156.168	167.086	163.479	164.883	166.293	164.951	104.58	134.733	23.4579	6.46709	34.5661	-49.5554	-137.82	-215.258	10.5563	-11.7959
3814	CCCCCCCCCCCC[N+]12CC[N+](CCCCC[N+]34CC[N+](CCCCCCCCCCCC)(CC3)CC4)(CC1)CC2	7	33.9411	43920.1	12.1942	0	4	4	0	0	186	1756	1.72093	0.59375	0.64	1.44186	1.36721	1.36589	1.36067	13.6124	17.6364	9.08173	7.19158	7.67708	7.98933	162.391	130.225	102.693	112.75	111.928	167.261	148.017	159.739	163.472	164.629	168.391	166.156	166.091	167.616	39.3359	-34.0984	-55.6604	-26.4273	28.623	1.55544	13.5014	11.5868	17.9805	-14.2407
1152	N#CC1=C(N)Oc2[nH]c(=O)[nH]c(=O)c2C1c1ccc[nH]1	18	15.6419	118.322	5.46656	11	8	5	3	0	229.472	878	12.2069	2.44444	3.88235	7.91284	6.25137	4.28889	5.72549	30.2759	30.5484	24.4923	26.2647	10.8667	11.1765	249.231	231.586	212.085	174.863	115.237	165.46	154.557	153.355	157.684	161.441	162.876	171.325	177.405	178.259	18.1974	12.107	-32.3781	60.1938	-18.4566	-92.8419	-53.3175	63.3674	6.64566	1.58977
3572	Clc1ccc(-c2nn(-c3ccccc3)cc2C2CC(c3ccc(Cl)cc3Cl)=NN2c2ccccc2)cc1	8	29.7031	441.678	7.39891	29	7	4	0	3	156.238	2164	7.53129	4.75223	4.02342	2.69376	2.49498	2.54728	2.50078	37.3103	30.127	23.562	24.8261	22.8391	21.6973	273.163	230.388	226.226	233.772	230.383	155.802	142.678	146.23	154.609	156.851	156.624	152.027	152.763	153.846	48.7894	-5.16277	-24.5159	-24.0456	-11.7251	-10.7801	-38.2503	-72.4344	9.30054	-2.27646
2036	O=C(c1ccncc1)N(/N=C/c1c[nH]nc1-c1cccc(Cl)c1)C(=O)c1ccc([N+](=O)[O-])cc1	14	26.4268	284.903	6.87592	23	11	6	4	1	348.839	1682	11.4205	8.20847	6.88574	7.11916	4.21907	5.20653	3.87864	34.3265	31.2885	25.3824	24.8462	24.6857	22.8019	266.052	236.034	228.743	240.12	226.939	160.56	148.291	150.387	155.217	161.702	162.139	156.814	157.915	154.586	35.0083	6.27093	18.3886	-62.5603	-88.6133	-37.0486	47.7438	26.0679	6.14202	-6.69596
2371	Cc1cc(C)n(CC(=O)c2ccccc2)n1	13	12.2681	86.2841	4.92765	11	3	2	1	0	121.361	644	7	2.18919	0.810811	4.04537	2.77673	2.88288	2.03604	21.4667	23.8387	17.0333	14.1587	14.2432	9	221.464	192.273	159.217	147.222	185.994	161.504	145.832	154.162	159.483	160.889	161.432	167.035	154.931	157.643	47.24	0.88	-73.2	-20.08	40.8	-21.68	-69.12	-19.32	6.76	-2.48
3199	Cc1cc(NS(=O)(=O)c2ccc(N)cc2)no1	10	13.2029	84.2733	4.96469	11	7	3	3	0	187.716	966	9.5873	2.97297	2.8	6.70415	4.89406	4.16216	2.87778	34.5	37.4828	25.4727	21.8793	14.7838	13.8	234.035	205.554	181.916	203.229	158.888	164.266	150.024	153.958	158.938	165.757	166.669	158.961	168.279	160.37	8.43764	35.8866	-58.4535	-6.85488	25.9388	24.0862	-125.426	-10.678	3.99617	-4.10842
1460	CCOC(=O)c1cnn(-c2nc(-c3ccc(OC)cc3)c(C#N)c(=O)n2C)c1N	16.12	21.9939	304.765	6.78425	17	10	6	4	0	284	1252	10.4255	5.47059	5.75824	6.04255	4.33178	3.89515	4.71368	26.6383	27.9796	25.4348	24.1068	18.7843	19.1868	232.591	234.462	206.923	195.666	183.566	164.827	150.781	159.687	158.028	163.436	160.494	163.849	165.321	164.472	95.6338	91.4147	7.70665	-66.0204	-78.8592	-42.5613	-28.0607	-10.1421	19.4541	9.20462
808	O=C(C[n+]1ccccn1)c1ccc(Cl)cc1	20	12.1992	78.3283	4.83091	12	4	2	1	1	115.172	893	7.75404	3.0728	1.92889	4.42969	3.32988	2.68738	2.12247	34.3462	28.9259	20.9444	18.25	18.931	17.96	253.847	203.207	174.621	198.636	196.407	159.492	145.464	151.806	159.052	158.873	162.949	161.854	156.32	157.671	15.1671	-25.4267	-34.9517	4.50931	20.0406	-23.5201	-23.306	-1.10059	1.55621	-5.46746
2148	COc1ccc(/C=N/N=c2\scc(-c3cc(O)ccc3O)n2-c2ccccc2)cc1	14	23.3511	872.83	7.87035	23	7	3	3	0	207.892	1442	8.49887	5.17021	4.19649	4.2427	3.25477	3.40307	3.17531	29.4286	29.1731	23.12	22.4151	21.234	17.8526	251.171	228.825	212.29	217.703	213.244	157.696	144.468	147.916	153.045	156.14	157.52	155.981	154.934	156.975	39.3569	-14.3391	-40.1914	-7.00824	30.1886	-29.1887	-14.7691	-52.375	11.6601	0.027905
321	CCN1CCN(CC2SC(c3ccc(F)cc3)N(c3ccc(Nc4nc(Oc5cc(=O)n(C)c6ccccc56)nc(N(C)C)n4)cc3)C2=O)CC1	25	40.557	1665.06	9.04686	28	14	9	3	1	386.309	2342	8.00488	4.83186	4.30683	4.24515	3.17497	2.95174	3.04237	25.7363	26.9794	20.8995	18.3016	18.8451	18.1632	225.564	206.914	181.077	189.01	194.126	164.357	148.452	159.212	158.008	161.34	160.521	162.789	160.78	159.299	144.505	86.0889	-7.76598	94.5701	98.3056	-112.853	-24.3952	-40.8759	23.1834	2.01775
2453	C=C1c2ccoc2CC2C1C[C@@H](OC(=O)c1ccccc1)[C@@]1(O)C(C)(C)CCC[C@]21C	12	25.0883	646.363	7.60276	11	4	0	4	0	225.66	1260	6	2.40976	1.80899	3.5819	2.37142	2.90678	2.61064	20	22.7761	17.3368	13.5115	13.3805	12.1573	211.035	201.886	138.53	138.7	160.624	160.042	142.225	148.288	150.882	157.48	162.102	163.636	159.3	156.165	88.6813	59.6825	-50.9408	-114.297	35.0277	87.5848	-170.449	-183.493	26.1043	-3.47619
1089	COc1ccc(-c2nn(-c3ccc([N+](=O)[O-])cc3)cc2-c2nnc(-c3ccccc3)o2)cc1	18.6	26.1391	399.82	7.18494	28	9	5	4	0	273.278	1382	10.88	7.88172	6.43269	5.46556	3.38829	3.97133	3.4992	27.64	29.3333	23	21.8273	24.6452	20.9904	255.499	233.499	210.218	231.989	244.37	159.693	146.908	150.138	153.746	160.329	160.747	157.05	154.702	157.097	62.9744	37.1696	-11.8192	-51.464	-1.3584	-4.0288	-70.6352	-85.5856	10.5496	-0.8736
243	CC(=O)OC[C@H]1O[C@@H](Oc2nc(-c3cccs3)cc(-c3ccc(Cl)cc3)c2C#N)[C@H](OC(C)=O)[C@@H](OC(C)=O)[C@H]1OC(C)=O	26	33.895	533.515	7.76109	17	14	2	10	1	439.675	2390	10.2542	6.15805	5.36607	6.19261	4.19133	4.44554	4.35697	33.662	30.4054	24.2115	25.2683	24.0733	22.3154	243.606	216.266	211.347	204.88	208.821	159.846	143.621	152.891	158.073	154.074	157.385	159.739	157.844	158.033	111.194	18.8247	-154.087	53.3475	105.522	-89.7194	-107.163	-123.3	13.6568	7.65662
2428	CCOC(=O)C1=C(C)NC(=S)NC1c1cccc(OCCCOc2cccc(C3NC(=S)NC(C)=C3C(=O)OCC)c2)c1	12	32.8597	444.004	7.55445	12	12	4	6	0	307.5	2244	7.42897	2.56215	1.7767	3.8924	2.76893	2.54481	2.1379	28.4051	26.3902	20.1778	21.1692	14.7881	12.932	224.218	203.314	190.807	182.682	148.447	161.519	147.112	154.687	156.764	156.455	157.734	156.905	163.395	162.251	113.174	55.1245	-32.3824	-88.8406	-204.414	-82.5395	50.61	-45.5255	19.2681	11.8066
3663	CCCCCCCCO[C@H]1C[C@H](O)[C@@H](O)[C@H](C)O1	8	12.9752	872.565	7.35922	0	4	0	4	0	157.611	788	4.17391	0.894118	0.871795	3.42633	1.82246	1.94608	2.00214	17.1304	19.3913	11.2764	9.89167	8.63529	8.61538	166.634	125.885	107.6	112.719	112.471	167.274	147.677	157.531	165.818	167.103	168.496	166.415	166.7	167.441	28.3913	13.1928	13.397	-16.3932	-14.4499	-3.65217	-9.81474	-13.1947	5.43478	-2.569
3098	O=c1c2cc(I)ccc2nc(Cc2ccccc2Nc2ccccc2)n1NC1=NNC(c2cccc(O)c2)C1	10	31.1982	741.593	7.96978	28	9	6	2	1	252.634	4336	8.141	4.7306	4.8336	3.9474	3.17326	2.84694	2.92383	67.75	30.7971	23.8824	22.0881	21.0877	24.372	256.758	214.044	203.435	210.128	198.349	158.974	146.627	148.998	157.361	160.609	160.053	158.971	159.056	157.121	47.2495	-11.7185	-31.2801	11.1969	4.00938	-50.0503	-1.1506	-24.4717	9.36841	-7.22217
2670	CS(=O)(=O)c1ccc(OCc2nnc3n2N=C(NC(=O)c2ccccc2O)CS3)cc1	11	24.5138	387.157	7.09023	17	12	5	5	0	312.747	1778	10.3102	6.02469	5.7619	6.51557	3.73157	3.64361	3.5083	37.0417	36.6471	26.951	22.767	26.9259	25.5325	251.403	221.438	182.224	204.12	215.698	161.475	147.291	152.006	159.056	161.121	162.806	162.955	162.895	157.662	42.3709	47.1921	-108.073	-42.7348	-17.3931	50.3216	-41.5122	-24.0407	6.74089	-6.44271
4013	O=C(NCC(=O)N1c2ccccc2Sc2ccccc21)NN1C(=O)C(Cl)C1c1ccc(Cl)cc1	5	27.0126	418.739	7.26102	18	10	4	3	2	268.347	2104	8.95489	4.61991	5.56654	5.16053	3.55349	3.39352	3.98461	40.4615	32.625	27.5785	25.3554	22.0088	23.6703	268.29	232.453	217.88	195.371	179.482	158.01	145.368	149.879	156.29	156.024	157.324	158.989	162.541	164.55	34.1425	-7.13317	-29.3883	-28.7834	-2.16488	-68.2295	33.5374	53.8756	8.53254	-3.3284
47	O=C(O)CNC(=O)c1ccc(NC(=S)Nc2ccc(S(=O)(=O)Nc3ncccn3)cc2)cc1	34	25.4021	958.518	8.05931	18	13	6	5	0	363.258	1864	10.0959	4.88384	4.58824	7.1227	3.86968	3.75539	3.57204	36.549	35.0189	24.8991	24.1727	22.9091	23.8824	250.299	213.007	204.16	203.508	205.187	162.231	149.46	154.123	158.388	162.484	159.256	159.38	158.145	158.909	-3.68926	0.78944	-82.5529	-37.4978	56.2527	4.60455	-82.5542	7.6398	1.91542	-9.21915
3313	CCCCC/C=C\CCC(O)CCCCCCCC(=O)N1N=C(C)CC1=O	10	19.4486	74845.5	12.2164	0	5	2	3	0	242.611	1120	4.30769	1	1.02222	3.73248	2.12728	2.04524	2.05597	17.2308	19.5231	10.6407	10.1902	9.28571	9.22222	178.99	130.586	126.709	124.901	123.599	166.08	146.905	155.844	165.458	165.348	164.619	164.692	164.918	165.314	65	47.48	42.48	17.12	-61.68	-49.16	-30.4	-22.8	6.33846	-2.67266
3843	O=c1c2cc(Br)ccc2nc(Cc2ccccc2Nc2c(Cl)cccc2Cl)n1-c1ccc(/N=C/c2ccc(Cl)cc2)cc1	6	34.1646	1517.09	8.78317	34	9	4	1	4	222.955	3598	8.12126	4.84701	4.40466	3.43008	2.84859	2.8214	2.68661	55.3538	32.8429	28.16	26.5455	24.1705	23.8	284.437	244.288	233.385	245.24	227.189	154.672	141.737	145.264	153.168	155.978	154.747	150.909	151.635	154.953	45.0623	-11.1509	-21.1314	-13.0266	-26.4288	-61.6852	2.36223	9.296	8.70888	-7.90249
2237	COc1ccc(OC)c(/C=N/NC(=O)c2cc(Cl)c(Cl)[nH]2)c1	13	16.4703	153.203	5.82022	11	8	3	3	2	159.066	1434	9.29171	5.43056	5.47281	4.54475	2.95237	3.78228	3.67339	40.9714	31.5833	32.5484	22.1077	22.4375	23.4043	249.154	237.961	170.891	169.262	197.818	163.013	149.972	157.285	156.516	160.772	164.836	166.316	165.051	158.052	42.1482	-17.3518	-41.8966	-23.4362	21.784	11.4503	-43.337	24.6329	8.61306	-2.25551
3696	Cc1cc(Cl)nc(SCc2nc3ccccc3o2)n1	8	15.0276	154.205	5.68013	15	6	3	1	1	94.3976	1234	8.89825	5.57099	5.22222	3.25509	2.50873	2.77281	3.44591	42.5517	34.2581	28.963	31.28	24.9722	27.1429	271.16	233.826	213.981	214.768	196.857	158.35	144.101	151.401	157.627	158.102	157.567	153.864	162.055	163.898	46.5062	19.8272	-86.1111	-71.8272	12.3951	71.1605	54.1358	-83.4074	3.94768	1.72652
2844	Cc1cccc(OCc2ccccc2-c2nnc(-c3cc(C)cc(C)c3)o2)c1	11	22.1272	344.281	6.87108	23	4	2	2	0	147.75	1112	7.44	4.29545	4.05618	2.955	2.68812	2.62437	2.70724	22.24	24.9245	18.8942	16.0579	17.3864	17.6067	235.353	216.611	186.239	184.858	210.886	158.093	142.711	149.4	149.057	159.359	159.652	162.387	153.072	150.432	81.0592	43.6032	-2.5344	18.0144	-44.8416	-38.3536	-61.7568	-59.7104	12.1872	-0.5488
1793	COc1ccc(OC)c(/C=N/NC(=O)c2cc(Cl)c[nH]2)c1	15	15.6942	113.146	5.47062	11	7	3	3	1	159.478	1146	9.07443	5.29861	5.25768	4.5565	2.94003	3.78639	3.67978	32.7429	28.9167	24.8065	20.3846	20.4375	21.0213	235.643	219.132	163.257	163.102	190.583	163.491	150.169	157.571	157.015	161.013	165.101	166.621	165.199	158.385	41.4939	-15.8495	-37.7002	-27.4093	15.5659	8.92695	-41.9664	22.3827	8.17469	-1.72816
4448	N=C(N)NS(=O)(=O)c1ccc(NC(=S)Nc2ccc(C(=O)NCC(=O)O)cc2)cc1	0	22.7924	675.688	7.61434	12	13	6	5	0	374.258	1756	9.64352	4.38286	4.54054	7.79703	3.69129	3.66033	3.77644	36.5833	34.7551	24.6275	22.7196	21.3494	24.7838	239.473	209.186	189.425	192.592	183.055	164.445	152.531	154.223	159.717	162.51	161.516	159.847	161.877	162.051	-9.9674	4.24633	-83.1655	-1.44695	-36.5829	28.4701	-19.2849	13.5328	3.11111	-8.77778
161	Cn1cc(Cl)c(/C=N/Nc2cc(C(F)(F)F)nc3c(C(F)(F)F)cccc23)n1	28	22.1005	466.747	7.17541	15	12	5	0	7	483.63	1606	16.0422	13.5507	8.2854	12.7271	6.87678	13.8704	4.7804	42.2632	34.575	31.5867	28.3537	33.8529	29.1765	259.735	248.103	222.912	209.161	204.952	182.199	156.052	171.603	165.541	173.675	174.065	181.593	198.297	169.748	46.5399	92.8735	-2.62929	-8.08327	22.4867	-12.8216	12.4777	-37.8686	0.99723	1.90859
2740	Cc1ccc(C2=NOC(Cc3ccc4c(c3)OCO4)CC2)cc1C	11	19.1893	151.503	5.89608	12	4	1	3	0	128.972	982	7.24444	2.9759	2.75342	2.86605	2.42248	2.3745	2.22831	21.8222	24.6667	16.981	13.5478	13.4458	12.4795	222.569	198.016	144.614	165.23	153.391	159.706	143.328	151.156	153.402	157.983	162.691	159.961	162.19	162.297	71.3393	9.0642	-82.9926	-50.0765	8.15259	-26.3709	-0.37679	0.596049	10	-5.22222
131	Cc1c(-n2c(Cc3ccc(Cl)cc3)nn(Cc3nnc(NCc4ccccc4)s3)c2=O)c(=O)n(-c2ccccc2)n1C	30	33.3766	3535.65	9.60574	33	12	8	2	1	277.787	2172	8.40651	4.75988	4.58115	4.02589	3.25574	3.13038	3.06108	31.4783	29.5676	22.9739	20.9181	20.9722	21.9494	246.736	219.103	203.594	208.663	198.959	161.347	148.103	154.742	158.072	160.402	163.27	160.248	161.001	160.306	95.8548	40.7705	-1.84011	-32.0067	14.7176	-74.1538	-70.4064	-59.4354	17.2166	2.74438
3437	N#Cc1c(N)c2c(N)c3c(nc2oc1=O)OC(c1ccc(Cl)cc1)=CC3c1c(-c2ccccc2)[nH]c2ccc(Cl)cc12	9	33.9219	564.41	7.77087	31	10	5	3	2	286.622	2186	9.95426	6.28867	5.88502	4.69872	3.46797	3.18498	3.35919	35.8361	31.0597	26.6552	25.2547	23.9196	24.8955	278.964	261.539	238.545	245.801	239.184	156.061	143.989	144.045	148.969	154.04	154.397	151.688	152.489	154.653	51.6748	54.7598	46.3397	12.3787	-53.3835	55.8942	-90.4208	-91.2018	15.8659	3.82881
1401	Oc1on[n+](-c2ccc(Cc3ccc(-[n+]4noc(O)c4CN4CCN(c5cccc(Cl)c5Cl)CC4)cc3)cc2)c1CN1CCN(c2cccc(Cl)c2Cl)CC1	17	44.0117	664.633	8.20398	34	16	8	4	4	300.938	3246	7.5314	3.30885	3.92775	3.23589	2.66789	2.5215	2.2847	34.9032	29.38	24.1709	18.6103	16.0932	17.1823	242.218	211.793	180.602	175.405	165.1	162.11	148.281	155.701	158.625	160.288	160.971	163.016	164.054	159.485	102.454	0.717214	-55.5756	-17.2673	-34.9633	-253.5	-67.0618	122.917	18.2726	-13.3153
1321	Cc1ccc(N2C(=O)C(Cl)C23C(=O)Nc2ccccc23)cc1	17	17.707	215.52	6.16151	12	5	2	2	1	179.068	1140	8.78871	2.80897	1.3284	5.11622	3.63907	3.06388	2.73388	32.5714	28.9211	26.2805	24.3933	16.4561	13.1556	257.922	240.1	208.818	203.608	180.936	157.742	143.727	148.016	153.342	156.149	157.487	158.571	157.052	158.196	43.4815	29.8642	-7.30864	3.8642	2.55556	-92.0864	-56.4321	-53.0617	14.12	3.96
3092	COc1ccc(/C=N/c2ccc(Nc3nc(Oc4ccc5c(C)cc(=O)oc5c4)nc(N(C)C)n3)cc2)cc1OC	10	32.0956	2358.13	9.17661	28	11	6	5	0	276.361	1722	9.30435	5.28777	5.33824	4.00523	3.22762	2.96003	3.20731	24.9565	27.0548	22.7153	19.0316	18.5252	19.2206	233.59	229.475	187.158	189.25	193.86	161.974	147.341	157.863	153.553	161.209	161.18	162.63	161.698	157.541	127.078	72.3627	-42.1426	-59.2491	-128.967	-26.9704	-2.52405	-17.2707	19.1042	2.3892
4349	O=C1CC(CBr)N1OS(=O)(=O)c1ccc([N+](=O)[O-])cc1	0	15.3123	135.941	5.60536	6	10	2	6	1	319.878	2332	12.8107	8.80912	3.73765	11.0303	4.68487	9.31007	2.93673	80.4138	47	35.4333	35.3	33.1026	25.2778	262.072	218.409	219.698	231.415	206.956	162.562	147.676	153.822	160.47	162.915	163.057	159.575	157.791	164.655	10.1311	71.7874	18.6209	-76.7292	-74.6785	-124.543	67.5323	85.3778	1.64447	-5.32818
622	N#Cc1ccc(Nc2nc(Oc3ncnc4ccccc34)nc(N3CCN(c4ncccn4)CC3)n2)cc1C(F)(F)F	22	33.447	426.787	7.49137	28	15	11	1	3	426.09	1838	12.1935	8.41221	8.26562	6.87242	3.67335	4.1531	3.75011	29.6452	30.2836	23.3143	22.5034	23.5191	24.6172	249.687	221.608	201.61	203.285	208.746	170.025	151.872	164.358	161.122	169.335	171.725	167.497	170.012	161.6	76.3975	105.134	27.2268	-65.3028	-87.1904	-87.3361	49.6275	-8.70135	5.96878	0.50052
3159	C=CCNC(=O)NNC(=O)c1sc(-c2cc(-c3ccc(Cl)cc3)n(-c3ccc(F)cc3)n2)nc1C	10	27.1744	1392.77	8.49181	22	11	6	2	2	310.787	1932	9.45544	5.62963	4.94879	5.65066	3.45729	3.46468	3.32729	35.1273	31.0172	26.0439	24.1638	25.2439	23.2	253.755	223.252	224.923	227.978	219.226	162.887	148.902	153.407	160.218	160.858	158.857	157.212	158.467	157.137	60.4749	24.9443	-40.5722	-17.7588	-20.8737	-42.9109	14.2378	-65.294	11.0307	1.53488
252	CC1CC(C)CN(c2nc(-c3ccc(NCC(=O)Nc4ccc(Cl)cc4)cc3)nc(N3CC(C)CC(C)C3)n2)C1	26	31.6477	2112.28	9.04182	18	9	7	1	1	231.394	1852	5.77006	3.062	2.10048	2.89243	2.56847	2.47817	2.15386	23.15	23.8095	15.7606	12.8484	18.0331	13.9565	209.949	173.677	174.62	164.461	202.222	164.495	147.958	156.956	159.348	170.001	160.398	170.58	155.442	160.367	111.226	87.7746	76.9919	71.3986	-17.9338	-157.378	-225.574	-220.808	13.64	-5.52
3135	Nc1[nH]nc2c1C(c1c(-c3ccccc3)[nH]c3ccc(Cl)cc13)C=C(c1ccc(Cl)cc1)O2	10	26.8343	398.785	7.18235	26	7	4	1	2	158.483	1792	8.25902	4.7799	3.57926	3.10751	2.87069	2.85142	2.78119	35.1373	29.9821	23.9583	22.0698	22.2293	22.04	269.971	243.148	236	237.973	219.298	156.704	144.871	144.925	150.936	154.066	152.635	152.031	155.24	159.957	38.0693	13.0095	-10.8658	-29.8509	12.2541	7.52446	-107.739	-111.322	11.0446	0.969627
300	CCSc1nnc(-c2ccncc2)o1	25	10.5662	73.7657	4.63737	11	5	3	1	0	79.2534	800	8.71498	1.33333	0.761905	3.4458	2.56614	2.07755	2.07143	34.7826	32.2917	23.2821	22.9697	21.375	9.61905	244.979	202.992	188.685	207.178	211.259	162.257	147.698	155.032	157.303	163.088	171.86	158.591	144.851	157.173	45.0231	56.3272	22.8914	-60.7496	-83.1582	-43.4037	-19.1762	2.10838	5.00567	4.56333
3637	COc1ccc2c(c1)CCC1=C2N=c2s/c(=C\c3c[nH]c4ccccc34)c(=O)n2C1c1ccc(Cl)cc1	8	30.1795	552.615	7.62299	26	7	3	2	1	203.12	1922	8.17033	4.86055	4.75263	3.44271	2.89621	2.8393	2.81714	32.5763	29.9231	24.1818	21.7152	22.0604	24.1045	265.302	244.43	221.076	221.484	217.181	155.121	141.569	146.411	148.557	152.838	153.264	152.518	153.406	154.619	57.939	5.89741	-22.3433	-53.0145	-1.84358	11.6095	-0.408695	-44.7551	15.9181	4.10399
2500	COc1ccc(/C=N/N=c2\scc(-c3cc(O)ccc3O)n2-c2ccccc2)cc1O	12	24.1272	775.024	7.7843	23	8	3	4	0	242.67	1506	8.96889	5.38596	4.5625	4.8534	3.28254	3.47726	3.279	30.12	29.566	24.2255	23	21.5263	19.4062	250.475	232.091	211.599	208.928	213.894	158.251	145.241	147.985	153.056	156.619	157.662	157.758	155.386	156.94	37.2503	-8.61298	-33.2405	-36.8516	-5.71182	2.85867	-12.4587	-45.7456	12.8428	-0.1168
3471	CO[C@@H]1O[C@H](CNC2=C(Cl)C(=O)c3ccccc3C2=O)[C@H]2OC(C)(C)O[C@@H]12	9	21.4952	252.21	6.52351	6	8	1	6	1	230.651	1426	9.01287	4.72509	5.10047	4.90747	2.90875	3.00104	3.22505	30.3404	27.98	23.5345	20.1789	18.8454	19.9043	227.96	204.511	166.994	158.466	169.804	161.693	145.385	154.7	158.893	159.754	162.44	164.609	163.05	163.423	72.6719	21.009	-63.8505	-32.1208	-67.8528	-61.9346	139.844	143.81	13.5215	3.26573
1250	O=C(/C=C/c1ccc(O)cc1)C1C(=O)NC(=S)NC1=O	18	15.2749	183.843	5.90723	6	7	2	4	0	249.625	1088	10.8148	6.36842	6.04505	8.32083	4.37037	4.34795	5.42376	36.2667	30.7097	23.7424	25.2459	23.2895	23	258.851	217.668	185.892	214.778	212.073	158.971	147.049	147.893	155.565	159.922	160.011	156.701	155.542	161.859	8.8642	-27.0617	-35	60.8272	-11.3704	-28.8148	3.76543	-31.321	1.80444	-6.91556
3476	N#Cc1c(Cl)c(Cl)c(Nc2ccc(N3CCCCC3)c3c(=O)[nH]cnc23)c(C#N)c1Cl	8.7	24.0343	248.194	6.64561	16	10	6	1	3	233.238	1996	9.2351	4.92593	5.20434	5.07039	3.5091	3.25678	3.40332	43.3913	32.4898	29.931	30.7373	25.3238	27.4023	272.789	239.313	228.908	214.589	210.467	160.735	146.666	152.083	157.143	159.3	156.801	160.551	162.33	162.925	57.3333	63.7778	93.8272	56.1975	-7.24691	-96.5556	-34.2222	18	11.8105	4.75898
373	CCOC(=O)C1=C(C)N=c2s/c(=C\c3ccc(OC)cc3)c(=O)n2C1c1ccc(SC)cc1	24	25.4605	615.609	7.61653	17	8	2	4	0	244.146	1790	7.94542	3.5628	3.02514	4.28326	3.64715	2.96332	2.53305	31.4035	29.7	25.2288	23.5672	20.0362	21.3796	243.503	240.016	209.956	206.508	196.122	157.664	142.377	151.178	150.031	152.228	155.003	155.193	156.589	156.516	93.3029	69.7649	-11.8879	-4.51958	14.5676	-76.7097	-110.815	-25.8288	20.4044	13.2299
463	Cc1cc(=O)oc2cc(Oc3nc(Nc4ccc(N5C(=O)C(CN6CCN(c7ccccn7)CC6)SC5c5ccc(O)cc5)cc4)nc(N(C)C)n3)ccc12	23	44.133	3065.69	9.73278	34	15	9	5	0	385.865	2496	8.45154	4.57703	4.56067	4.10494	3.04575	2.84063	2.96407	26.5532	27.7723	21.4798	18.8701	18.084	18.5858	234.271	212.736	189.461	188.876	188.588	161.908	147.388	156.445	156.251	160.773	159.278	160.481	161.405	156.903	132.977	64.9245	-62.7119	7.14969	-36.5874	-118.832	-61.4946	13.2893	20.0058	-2.6993
2876	CCOC(=O)C1=C(C)N=c2s/c(=C\c3ccc(F)cc3)c(=O)n2C1c1ccc(SC)cc1	10	24.8628	499.534	7.37683	17	8	2	3	1	288.896	1768	8.77149	3.70175	3.29285	5.45086	3.89327	3.06783	2.96433	33.3585	30.75	25.6726	24.5645	20.5038	21.6822	251.388	239.444	221.93	214.406	196.384	158.932	142.37	150.186	152.035	153.76	154.301	154.832	157.536	157.636	84.0912	72.5242	-16.7991	-14.4613	-11.2528	-102.83	-107.641	-8.69163	16.7686	10.9633
3677	N#Cc1ccc(Cn2cc(C(=O)NN)c(=O)c3cccc(C(F)(F)F)c32)cc1	8	21.6045	364.737	6.9288	16	9	4	2	3	429.535	1264	12.9268	7.31034	7.23596	10.4765	6.0828	4.86638	7.13358	30.8293	29.814	24.8352	23.5481	22.7471	21.618	253.368	241.644	217.153	194.358	212.587	169.257	150.186	157.687	153.363	165.104	162.575	170.701	160.326	173.616	33.9851	57.9917	23.0428	-21.8953	-69.5193	-121.232	13.975	-12.9423	6.92564	1.00714
23	NC1=Nc2ccccc2NC=C1C(=O)Nc1nc2ccccc2s1	37	19.1489	151.468	5.89584	15	7	5	1	0	167.142	1190	9.09309	5.84524	4.91667	4.51736	3.35053	3.8233	3.2091	32.1622	31	24.8889	23.5823	23.0893	21.7917	260.368	231.517	194.213	196.318	208.348	159.687	148.254	148.969	156.102	161.403	164.048	160.665	160.335	155.05	22.8801	4.51562	-1.1706	-44.6122	-28.0662	30.6057	-10.3438	-51.876	6.75603	-1.85318
3161	N#Cc1ccc(Nc2nc(NC3CCCCC3)nc(NC3CCCCC3)n2)cn1	10	22.6274	263.389	6.63834	12	8	8	0	0	176.944	1176	6.21053	3.65517	2.66165	3.10429	2.89536	2.82088	2.38847	20.6316	23.55	13.3418	12.8467	17.5172	14.4662	205.451	150.6	162.964	197.868	185.763	167.198	150.523	157.435	166.102	170.164	173.749	165.302	168.239	164.844	78.615	101.338	117.44	95.4848	-32.8698	-122.939	-173.274	-104.105	4.62235	-1.43798
3286	COc1ccccc1C(=O)n1cc(C)n(-c2ccc(Br)cc2)c1=S	10	18.5393	189.365	6.11915	17	6	2	2	1	150.509	2370	8.14132	3.04407	2.77837	3.8592	2.9011	2.65034	2.62164	60.7692	32.4878	30.4375	27.2069	33.3889	19.5714	264.337	249.715	216.598	190.983	204.784	156.316	143.669	151.238	151.071	154.6	151.898	158.706	154.462	155.986	55.0913	20.1954	-17.8397	-33.6164	-47.8871	-60.5181	-28.423	-39.8445	12.5437	3.1762
1818	Cc1ccc(C2C(C#N)=C(N)Oc3[nH]c(=O)[nH]c(=O)c32)o1	15	16.4584	126.768	5.58429	11	8	4	4	0	239.25	930	12.3226	2.96154	2.23529	7.71774	5.83594	4.62393	5.0049	30	30.303	25.2985	25.9583	14.9808	10.7059	246.948	237.58	214.606	189.585	147.846	164.009	151.698	153.223	156.383	159.598	161.619	165.593	167.612	181.603	42.8439	29.1405	-80.9386	63.3486	44.0021	-62.2851	-117.155	-31.2986	8.7846	3.11967
2394	COc1ccc(Cl)c(-c2nnc3sc(Cc4c[nH]c5ccccc45)nn23)c1	12.19	21.7871	251.467	6.52056	23	8	5	1	1	128.981	1552	9.12316	5.54259	5.0496	3.14588	2.79858	2.83935	2.76685	37.8537	32.8667	27.4	24.9545	27.15	22.4464	268.676	246.069	208.533	226.903	231.735	158.904	146.619	150.558	152.52	157.022	161.435	159.898	160.305	159.47	49.1418	1.83932	-21.2798	-21.7508	30.3878	19.1742	-51.9018	-65.8283	10.5735	2.07258
2604	Cc1ccc(-c2onc(-c3ccccc3)c2S(=O)(=O)NC(=O)c2cccs2)cc1	12	22.9002	315.538	6.81899	22	8	2	4	0	265.247	1638	9.39753	5.28472	4.16495	5.89439	5.21943	4.10024	3.48043	36.4	36.3542	28.1053	29.63	24.7083	21.4948	265.265	233.768	236.5	243.042	228.942	155.562	141.079	145.618	149.838	157.29	155.352	154.525	153.83	152.572	18.8807	57.0823	-2.15364	142.754	-5.49931	-60.3155	-166.757	-114.793	8.37037	2.62963
2683	Cc1ccccc1OCc1ccccc1-c1nnc(Cc2cccnc2Cl)o1	11	21.9773	278.603	6.65941	23	6	3	2	1	146.033	1374	8.33924	4.95014	3.96135	3.17463	2.76854	2.72925	2.65085	29.8696	28.0612	21.9896	19.25	20.1282	18.1196	250.947	221.412	191.975	204.491	227.801	158.495	143.758	149.859	152.422	159.154	161.989	159.183	149.776	155.539	59.0618	8.76721	-46.2665	-33.3609	25.94	8.53948	-30.4662	-22.4155	8.59546	-3.33837
3123	COc1cc(C2C(Cl)C(=O)N2NC(=O)NCC(=O)N2c3ccccc3Sc3ccccc32)ccc1O	10	28.3864	560.944	7.61056	18	11	4	5	1	320.564	1982	9.36929	4.83249	5.64343	5.62393	3.55929	3.54648	4.32628	34.7719	30.9672	27.0312	24.2222	19.3788	21.2545	252.573	232.062	206.793	187.61	170.481	159.664	146.657	151.942	155.966	155.998	158.24	159.712	164.31	166.19	48.6201	-0.904901	-47.5551	-74.7091	-16.0147	-40.9828	62.6459	96.6134	14.1379	-0.605417
2261	CCS(=O)(=O)c1nnc(-c2cc(-c3ccccc3)nc3ccccc23)o1	13	20.6006	206.523	6.28592	21	7	3	3	0	218.049	1294	9.52304	5.19231	4.375	5.31828	3.46749	3.5658	3.75949	31.561	34.0682	23.7033	22.4713	24.0385	20.5125	255.829	222.164	229.528	236.117	224.984	158.055	142.436	147.87	155.315	158.12	157.206	153.31	153.03	156.731	40.2701	90.0678	49.8753	-71.203	-56.9226	-60.9867	-85.0403	-43.947	8.87626	2.17609
4202	O=C(c1cccnc1Nc1nc2cc(Cl)ccc2s1)N1CCNC(Cl)C1Cl	2	21.4081	178.74	6.17918	15	10	5	1	3	154.853	2058	8.22584	4.44173	3.61061	3.77689	2.92908	2.65919	2.54725	50.1951	35.5	31.1875	28.978	26.0732	28.1757	272.6	227.772	231.445	228.782	212.113	160.922	147.864	155.153	159.668	160.968	159.698	159.648	160.866	158.696	30.3786	2.38125	23.0782	-12.5335	-29.2772	-47.8255	-6.61789	-14.352	4.4069	-1.7787
3348	O=C1N/C(=N\c2cccc(Cl)c2)S/C1=C\c1ccccc1[N+](=O)[O-]	9	18.701	175.7	6.04424	12	8	3	3	1	247.703	1470	10.9426	8.38444	5.89474	7.28539	4.20194	6.61811	4.51316	43.2353	35.1389	27.9275	28.7656	27.46	24.3158	281.381	238.276	240.789	247.296	218.936	157.16	145.124	145.91	153.404	157.372	156.174	154.352	161.264	161.309	16.4726	1.26464	6.07326	-14.8726	-20.4371	-22.4368	9.25281	-27.5617	1.88581	-2.84429
2304	Cc1cc(C(=O)Nc2nnc(S(=O)(=O)Cc3ccccc3)s2)c2ccccc2n1	13	22.9811	270.632	6.66547	21	9	4	3	0	265.247	1636	9.39753	5.7193	5.85311	5.89439	3.7307	4.24687	3.66975	36.3556	36.125	27.0408	25.5253	26.2632	26.9492	261.859	229.367	215.001	204.701	204.607	158.012	143.169	147.58	154.235	156.019	157.444	160.952	161.328	159.156	24.8066	26.7133	-43.3224	46.3457	-9.55281	-71.6831	37.0672	-19.4376	6.37037	-1.76543
3491	Nn1c(SCC(=O)c2ccccc2)nc2sc3c(c2c1=O)CCCC3	8	19.8441	704.496	7.47377	15	7	3	2	0	198.312	1452	7.73545	4.51282	4.32787	4.72172	3.4896	3.76363	2.99848	34.5714	31.4	25.33	26.0825	23.2923	20.0984	250.191	217.311	195.694	191.062	201.118	158.219	144.151	148.195	153.052	156.047	159.35	160.987	159.658	156.659	49.7997	43.1784	20.7448	-41.8168	-58.1907	-65.4306	-26.1741	31.9201	10.3963	3.82653
545	CC(NCCC(=O)c1ccc(Cl)cc1)C(O)c1ccccc1	23	16.5797	115.397	5.53683	12	4	1	2	1	172.228	1134	5.94297	2.45584	2.81709	4.10066	2.37654	2.83959	2.64786	27	24.4884	16.8	14.0291	13.141	15	224.406	179.405	144.467	139.02	149.388	160.261	144.217	150.246	158.471	160.397	162.268	164.186	162.456	157.854	23.5697	-14.7746	-28.9031	-48.6426	-8.18706	-7.74925	10.8875	23.0477	5.46939	-8.02041
332	N#Cc1ccc(Nc2nc(Oc3ccnc4ccccc34)nc(N3CCN(c4cccc(C(F)(F)F)c4)CC3)n2)cc1C(F)(F)F	25	36.6905	415.356	7.55519	28	15	8	1	6	605.431	2080	12.9118	7.44516	7.5298	8.90339	3.76946	4.56237	4.12206	30.5882	30.1781	23.1899	21.948	22.9355	23	250.559	224.309	193.727	198.404	203.969	171.993	150.354	163.358	160.099	166.845	170.917	168.331	173.35	167.04	81.0355	143.861	17.5796	-42.4317	-0.483564	-155.051	-172.959	-115.011	3.86159	-2.22837
1679	COc1ccc(/C=N\Nc2nc3c(c(=O)[nH]2)C(c2ccc([N+](=O)[O-])cc2)C2=C(CC(C)(C)CC2=O)N3)cc1	16	30.1304	3048.98	9.35756	18	11	6	5	0	375.174	1612	9.375	4.73292	5.35172	5.86209	3.68418	3.35973	3.51973	25.1875	26.8529	20.6282	17.041	17.2981	18.9379	231.015	219.608	193.552	195.943	179.14	162.906	148.6	152.479	153.654	162.759	162.138	159.603	164.752	162.354	89.9414	38.0361	11.2773	113.112	-110.182	-35.2998	-113.921	29.876	15.0664	-3.52637
2646	Cc1nn(-c2ccccc2)c(Cl)c1/C=C/C1=Cc2c(sc(N3C(=O)[C@@H](Oc4ccc(Cl)cc4Cl)[C@H]3c3ccccc3)c2C#N)C(C)(C)C1	11.65	38.4208	2796.07	9.50459	28	10	4	2	3	277.61	2844	7.78259	4.35515	3.85301	3.60532	3.2284	3.04972	2.78187	36.9351	30.4458	26.7486	23.7583	22.0183	23.375	266.361	242.112	230.618	228.501	220.919	155.954	141.53	146.78	150.382	154.866	151.95	153.037	153.619	153.235	96.6006	26.6188	-2.58408	66.4658	-35.0977	-75.4775	-141.19	-123.747	22.0197	-1.33176
4384	CC(=O)CSc1c(C#N)c2c(c3nncn13)CCCC2	0	15.5325	172.555	5.84386	9	6	4	1	0	163.587	1034	8.18954	3.09259	0.8	4.81138	3.91093	4.15518	2.63704	30.4118	29.3611	23.4875	23.5	14.8519	8.71111	239.73	217.223	203.397	175.973	153.862	161.815	145.697	152.332	154.206	157.216	159.266	166.559	161.916	170.891	65.6348	54.371	-3.81238	-7.41945	-101.886	-93.1165	-13.2995	-40.9827	10.4083	8.06574
2359	Cc1nc(NC(=S)Nc2ccccc2)sc1C(=O)NN	13	15.0965	204.621	6.01431	11	8	5	1	0	148.517	1266	7.90572	3.75362	3.92105	4.50052	2.79653	2.85326	2.88353	38.3636	31.9412	26.8065	29.2295	24.3261	21.7632	245.843	214.837	201.195	186.597	189.443	163.084	153.368	154.748	158.309	158.278	163.728	163.282	163.472	158.226	26.1161	-4.50944	-25.9392	-14.9846	-37.959	-9.53801	20.028	-11.7797	6.44444	0.222222
4156	CSc1ccc(-c2[nH]ncc2-c2nc(-c3ccc(Br)cc3)c(-c3ccc(Br)cc3)[nH]2)cc1	3	25.432	356.579	7.03971	28	7	4	0	2	137.743	3820	7.53158	4.55787	3.71953	2.75487	2.57939	2.58373	2.47826	76.4	35.6111	30	25.2232	31.8839	28.0513	282.486	251.301	216.018	229.128	242.529	154.596	142.734	145.072	148.408	154.231	157.834	154.238	150.197	154.508	47.6449	29.4376	1.6615	17.825	-5.93222	-31.0839	-53.625	-79.423	10.96	-1.52
3019	CSc1ccc(OCc2nnc3n2N=C(NC(=O)c2ccccc2O)CS3)cc1	10	22.6844	436.881	7.14437	17	10	5	3	0	215.062	1650	9.19324	5.87342	5.57277	4.67527	3.22478	3.48508	3.10459	35.8696	32.9184	27.2717	22.3263	26.3924	25.8873	252.925	226.996	183.961	203.817	213.495	160.433	147.544	151.515	157.6	160.436	162.039	162.4	163.137	156.234	62.3464	41.5152	-55.4831	-13.2623	2.13527	25.5497	-33.6539	-0.0863264	9.51938	-2.24338
4094	c1ccc(-c2ccc(-c3[nH]ncc3-c3nc(-c4ccccc4)c(-c4ccccc4)[nH]3)cc2)cc1	4	27.2941	516.831	7.47149	34	4	4	0	0	160.278	1298	7.53571	4.6875	4.29457	2.8621	2.60943	2.61285	2.63867	23.1786	26.0164	19.0317	19.2231	17.7109	17	256.475	225.132	213.074	211.421	212.531	155.66	142.76	144.523	150.467	154.96	156.295	154.444	152.892	155.172	38.986	1.58929	7.125	4.6352	-28.7602	-32.449	-20.102	-49.0191	11.5153	-0.5
4442	COc1ccc(N(CC(=O)NCCCSc2ccccc2)C(=O)C#Cc2ccccc2)cc1	0	24.8866	1332.61	8.38882	18	6	2	3	0	245.087	1544	7.12618	4.24217	3.72267	4.15401	3.30242	3.21091	3.12751	26.1695	26.4754	18.5794	17.5242	18.094	17.64	236.876	197.257	182.34	183.86	193.28	157.923	143.176	150.654	155.407	155.506	157.722	159.326	158.281	154.235	53.5262	5.58633	-7.10051	-1.66625	69.9763	-42.6938	-44.8874	-31.4851	7.37978	-4.02815
2735	c1ccc2c(c1)Sc1cccnc1N2CCCCCCN1c2ccccc2Sc2cccnc21	11	27.2536	285.328	6.87741	24	6	4	0	0	144.562	1742	6.31481	1.42127	1.58454	2.40937	2.03801	1.87242	1.80099	29.0333	28.6154	22.0795	19.2895	11.6748	11.7246	247.224	209.025	193.903	167.862	150.365	156.962	142.373	149.25	155.32	155.67	153.633	156.535	159.195	159.309	57.4599	42.7842	36.6112	-81.0923	-125.906	-129.957	-69.6021	-5.18296	13.6889	9.83111
2429	O=C(NN1C(=O)CSC1c1ccccc1)c1ccc(-n2c(-c3ccccc3)nc3c(Br)cc(Br)cc3c2=O)cc1	12	31.9219	1232.72	8.50327	28	10	4	3	2	294.299	4194	9.14298	4.48509	4.25952	4.90498	3.48905	3.16605	3.19313	69.9	35.4769	31.7786	37.7517	27.6429	27.007	282.553	245.445	244.765	241.051	224.451	154.833	142.522	146.187	152.452	156.371	154.484	151.321	150.736	155.224	51.0264	24.9342	7.26715	6.75399	-76.7109	-138.131	-60.335	69.4306	10.3056	-1.52778
2702	Nc1nc(N)nc(N/N=C/c2ccc(C=O)cc2)n1	11	14.3609	109.933	5.34172	12	8	7	1	0	172.139	814	10.1333	6.36364	5.9375	5.73796	3.26462	4.04377	3.8125	27.1333	28.2581	21.6111	18.7963	20.6364	20.7812	230.673	209.29	157.257	174.643	199.675	169.765	158.789	161.76	163.97	166.644	180.471	168.249	167.7	163.973	22.9511	2.55111	-40.1733	-17.44	-46.5644	27.1422	-20.88	-14.8978	3.89	-3.06
2652	Clc1ccc(/C(Cn2nnc3ccccc32)=N\Nc2nc(-c3ccc(Cl)cc3)cs2)cc1	11.32	25.5129	443.413	7.25765	26	9	6	0	2	145.542	1972	8.4928	5.5918	5.1746	3.03212	2.8116	2.86417	2.71596	41.0833	33.1923	25.2647	22.9406	29.5532	26.7363	277.142	230.97	209.211	228.208	237.85	158.043	145.935	148.737	156.143	160.541	161.972	159.854	157.967	154.574	39.3211	-15.474	-41.9618	-41.4176	35.0365	5.17125	-42.9337	-40.2753	5.44444	-7.36111
4129	O=C1CC(c2ccc(Cl)cc2)N(Cc2ccccc2)C2CCCCC2N1	4	20.5631	224.264	6.36834	12	4	2	1	1	152.005	1268	5.3648	2.0355	1.43201	2.9805	2.3779	2.24505	2.11102	24.8627	24.1296	15.8446	13.7108	13.1953	12.9231	221.597	180.186	167.465	167.202	158.788	160.559	144.069	151.014	158.532	160.961	159.318	157.839	158.659	161.228	34.2188	-19.9988	-21.3446	-6.10262	-0.922304	-46.5523	-32.2496	-22.8729	6.49481	-4.4752
2247	C(=N/c1n[nH]c(/N=C/c2ccccn2)n1)\c1ccccn1	13	16.2635	158.924	5.81036	17	7	7	0	0	122.361	858	10	6.74359	4.86111	3.82378	3.86325	3.69658	3.13735	26.8125	28.8235	20.2105	18.9388	22.2051	17.8889	249.199	201.417	200.261	222.121	211.748	165.247	152.116	159.679	164.025	165.735	168.693	169.229	168.126	167.706	25.5	-3.25	-6.75	-2.25	29.25	-15.75	-48.25	-42.5	1.8457	-2.65332
1713	C/C=N/N1c2nnc(C)c(=O)n2NP1(=O)c1ccccc1	16	16.3562	155.27	5.7871	12	9	6	2	0	195.458	1092	9.8032	2.35938	1.07843	5.74877	3.56854	3.50521	2.84967	32.1176	35.2778	29.7222	28.5417	14.25	9.94118	234.58	219.168	207.423	183.569	165.348	166.876	153.083	160.554	166.266	168.278	165.206	166.894	163.847	161.502	42.2778	76.639	46.3392	-51.2156	-37.0288	-138.448	-147.847	-51.4488	13.3166	7.52768
1146	CSc1ccc(Cc2nnc3sc(-c4ccc(-c5ccc(C)cc5)o4)nn23)cc1	18	23.2822	433.491	7.13658	25	7	4	1	0	137.34	1582	8.01891	5.00952	4.38095	2.92213	2.77038	2.70741	2.41349	33.6596	31.6863	25.0842	19.9903	26.5143	23.6286	260.853	234.972	192.855	223.28	233.216	156.661	143.258	147.877	150.946	155.421	159.506	157.393	154.269	155.284	75.649	46.2807	-32.4607	32.8112	70.2326	-15.8606	-54.6172	-12.3288	12.1598	-0.708013
1817	Cc1cccc(C)c1NC1=Nn2c(nnc2-c2cc(F)c(Cl)cc2Cl)SC1	15	21.4771	259.222	6.55094	17	9	5	0	3	177.32	1822	9.21108	4.28427	4.72162	4.32487	2.92827	2.32951	2.98994	44.439	34.1591	32.6047	27.4255	27.026	26.9194	269.678	251.072	204.757	207.061	208.228	162.794	147.877	152.459	156.996	163.412	163.008	163.893	161.069	155.835	71.256	48.5788	-53.1332	-17.1764	33.9354	64.2604	49.4185	-39.1288	11.2362	-0.879239
1865	O=c1cc(-n2c(/C=C/c3ccccc3)nc3sc4c(c3c2=O)CCCC4)[nH]c(=O)[nH]1	15	24.0867	587.476	7.47445	21	8	4	3	0	259.698	1454	9.13426	5.55776	4.38788	5.41037	4.81117	3.45428	3.15985	30.2917	29.6923	22.1102	23.6579	23.7723	22.3091	252.002	215.847	218.27	231.808	233.376	158.888	145.142	149.521	156.052	156.015	157.786	158.282	152.815	154.251	55.0332	61.1329	68.8422	94.4201	-49.9429	-58.865	-109.564	-75.6964	8.75694	6.52951
3816	Cc1c[nH]/c(=N/c2nc3ccccc3[nH]2)[nH]1	7	12.7969	90.5458	4.97586	14	5	5	0	0	85.6389	652	8.2963	3.26667	1.45455	3.17181	2.76852	2.85	2.09091	24.1481	26.7931	18.0755	15.898	16.9667	10.5152	230.266	187.687	173.796	205.679	191.951	166.112	154.098	158.366	165.206	170.124	175.23	159.079	165.161	160.476	34.3772	23.6612	-34.7627	5.89026	-22.6543	-36.0453	-55.7119	-27.4239	4.94925	-0.840878
1500	CC(C)(C)n1ncc2c(NCc3ccc(Cl)c(Cl)c3)ncnc21	16	18.1498	348.081	6.68535	15	7	5	0	2	110.351	1416	7.03025	3.45623	3.26296	2.75877	2.43712	2.61375	2.25305	35.4	28.619	25.2222	16.2364	19.2121	20.9	238.23	213.537	177.136	173.098	182.924	164.121	149.336	157.831	158.824	169.579	161.19	163.299	167.676	162.122	70.2186	40.3812	-7.3287	-10.7151	-111.6	-32.4748	-49.0912	25.5784	10.7863	-5.07
640	Cc1nn(-c2ccccc2)c2nc(SCC(=O)Cl)nc(-c3ccc(Cl)cc3)c12	22	22.1152	358.048	6.91029	21	8	4	1	2	165.292	1828	8.75367	3.91534	3.48148	3.93552	2.82915	2.56829	2.81338	43.5238	33.7556	29.7701	26.8161	23.7524	27.3053	278.569	248.115	257.139	247.045	211.779	157.114	143.59	148.877	154.694	157.968	154.837	151.12	155.328	155.293	55.8832	31.4807	-1.40254	-39.1433	-103.795	-111.561	-12.3904	33.8897	8.34694	6.17234
1554	COc1ccc(C2Nn3c(nnc3-c3cc(OC)ccc3Br)S2)c(OC)c1	16	21.08	265.719	6.57569	17	9	4	3	1	143.554	2534	8.94345	4.24941	3.81732	3.26259	2.71282	2.67776	2.53399	57.5909	34.1489	33.4471	30.6979	24.3291	22.2162	251.69	254.013	196.33	194.79	196.065	160.775	147.87	155.894	151.313	155.412	160.979	162.414	162.017	162.715	68.8636	-2.07701	-44.0165	-33.2155	20.2288	-19.3478	-27.8819	-7.59064	16.1875	7.625
1007	Cc1ccccc1N1C(=O)C(Cl)C1c1cc2ccccc2nc1S	19	19.1655	202.174	6.1846	16	5	2	1	1	143.366	1406	7.66445	3.26442	2.8	3.67604	2.96283	2.57681	2.59164	36.0513	29.5238	25.5341	23.5957	21.6835	17.2615	264.534	238.446	218.299	208.761	199.327	155.546	141.143	146.897	151.55	154.197	153.332	154.845	156.127	157.469	48.8478	10.715	-38.7186	-46.8616	-11.7055	-29.8017	-0.609467	-15.7683	11.3136	-0.556213
1737	Cc1cccc2c3nn4c(C)nnc4sc-3cc12	15.6	14.8254	100.461	5.19756	16	5	4	0	0	84.8645	930	8.94444	2.90625	0.888889	3.03088	2.54435	2.75	2.35802	33.2143	32	29.5439	21.7	15.5625	10	263.807	259.158	197.067	201.946	180.357	158.921	146.027	150.742	152.828	155.669	156.47	158.009	159.825	168.911	58.4399	40.4558	-42.1973	-47.9796	4.12245	-21.449	-73.4717	-37.7075	11.4898	4.06122
3534	Cc1c(-c2nc3ccccc3c(=O)o2)oc2ccccc12	8	16.9467	133.795	5.63824	19	4	1	3	0	151.722	864	10.4375	4.56522	3.35714	4.74132	3.55338	3.47101	3.14683	27	28.6286	24.1324	21.7647	18.5435	15.6429	263.569	242.022	207.184	213.199	216.044	154.912	140.968	146.107	150.707	155.497	157.948	155.485	153.44	150.799	50.75	60.25	21	-62	-53	-40.75	-87.5	-46.5	9.10449	3.2666
2958	Nc1nc(COC(=O)c2ccc([N+](=O)[O-])cc2)cs1	10	14.4988	95.5648	5.20166	11	8	3	4	0	247.587	1064	12.0159	8.9375	4.13793	8.84238	3.78875	7.95949	3.45402	38	34.3448	24.8431	21.566	29.0625	23.7931	254.669	219.819	196.037	201.685	217.117	162.209	150.073	151.433	156.903	162.162	163.124	160.51	160.245	159.053	22.6667	12.2222	-27	-85.7778	-15.7778	37.7778	46	-30.2222	2.5625	-5.4375
1964	CCCCCC[C@@H](O)C/C=C\CCCCCCCC(=O)N1C(=O)CSC1c1ccc(Cl)cc1	14.1	24.3174	267549	13.691	6	6	1	3	1	254.398	1798	4.32944	1.2872	1.05837	3.4849	2.34567	2.22235	2.08746	24.6301	23.0541	13.9895	13.6878	12.0351	12.2342	200.98	150.854	146.014	141.662	137.25	162.51	144.016	152.214	161.218	161.814	161.181	162.007	162.815	162.84	56.1278	33.1991	37.1316	53.9309	3.83676	-20.9183	-39.2214	-44.0116	8.51755	0.396885
16	CC1NN(c2ccccc2)C(=O)C1c1cc2c(=O)oc3ccccc3c2o1	38	21.8845	248.972	6.51059	19	6	2	4	0	218.528	1126	9.81395	5.6	3.90123	5.08204	3.21637	4.06636	3.08779	26.186	28	21.6	21.243	18.9333	15.358	249.846	217.033	209.82	195.827	186.926	157.806	144.243	148.585	156.262	158.948	156.063	154.559	158.425	159.73	58.391	55.7274	23.026	-21.046	-131.477	-39.1725	30.7399	-51.3434	11.0454	3.30395
1355	C[C@H]1CC[C@@H](C(C)(C)O)CC2=C1CC[C@@H]2C	17	12.5334	71.2586	4.73632	0	1	0	1	0	101.701	630	2.95238	0	0	2.42146	1.80352	1.93814	1	15	18.186	11.904	8.67089	4.19588	1	175.651	162.945	105.658	103.676	77.7295	164.172	144.077	152.365	155.252	160.43	166.128	165.897	169.211	184.918	37.7642	-2.4263	-63.8118	-29.5465	7.17234	-36.9116	-18.6848	63.4921	10.7551	-5.38776
2370	Cc1ccc(-c2c[nH]c(NC(=O)C3=NNCC3c3ccccc3)n2)cc1	13	20.5631	206.796	6.28725	17	6	5	1	0	172.222	1048	7.77778	4.24	4	3.82716	3.1918	3.16222	2.98873	23.2889	25.7083	17.7723	17.6471	16.8267	15.9565	233.198	198.683	172.476	176.242	179.728	162.022	148.455	152.309	157.306	159.815	165.33	166.47	165.933	162.502	45.0726	8.02469	-24.156	37.9126	2.90864	-24.7007	-51.363	-38.7081	8.29481	-3.61235
3174	O=C1C(Cl)C(c2cc3ccccc3nc2Cl)N1c1ccccc1	10	18.3894	195.425	6.10809	16	5	2	1	2	137.844	1400	8.32028	3.97814	3.53472	3.9384	3.20219	2.71909	2.87731	40	31.1053	26.45	26.1646	23.9344	20	277.351	237.946	240.122	232.496	213.011	155.587	141.67	146.59	153.418	155.801	154.342	154.454	157.353	156.865	26.7366	-4.28039	-21.0599	-29.5376	-13.6573	-14.484	2.49417	-14.4337	6.51673	-1.77796
3625	O=C(O)c1cccnc1Sc1nc2ccc(Cl)cc2c(=O)n1-c1ccccc1	8	22.0748	264.996	6.60933	22	8	3	3	1	239.231	1616	10.4012	6.82571	5.44811	5.98077	4.22235	3.74265	4.54683	40.4	33.814	30.407	33.8214	27.8235	22.7473	283.08	258.531	260.998	264.677	257.272	155.512	142.716	146.222	151.781	155.295	153.441	152.553	149.816	152.057	22.9538	5.98664	23.8866	-5.08074	-24.092	-43.2667	-57.4603	-54.42	6.9175	2.0575
3895	O=C1NCc2cc3c(=O)n(-c4ccc(Cl)cc4)c(-c4ccccc4)c(-c4ccccc4)c3cc2N1	6	28.208	400.274	7.24491	28	6	3	2	1	235.894	1628	8.53827	4.32323	3.33104	4.28899	3.42509	2.99654	2.84338	29.6	28.2333	22.3955	21.8511	19.2475	16.5206	264.916	241.644	255.616	249.355	214.428	155.421	142.561	145.562	150.462	151.954	148.934	147.635	150.972	155.821	42.3218	18.7966	24.5023	16.8758	-43.3072	-162.786	-137.623	-7.07893	11.8926	4.81818
1829	O=c1oc2ccccc2cc1-c1nnc(Sc2nc(Oc3cccc4cccnc34)nc(N3CCCCC3)n2)o1	15	32.3937	485.07	7.57059	31	12	7	4	0	253.753	1884	10.3352	7.83962	7.07143	4.15989	3.57164	3.45854	3.458	30.8852	31	23.2113	23.8478	29.5566	27.4732	256.996	216.206	225.168	239.496	247.164	160.022	145.931	153.141	156.578	163.513	161.108	159.115	159.123	156.967	93.8041	118.149	144.714	76.6228	14.9385	-54.2062	-98.9817	-137.604	8.96668	6.47084
2815	O=C1ON=C2C=C(c3cccs3)CC(c3cccc([N+](=O)[O-])c3)C12	11	19.1774	200.91	6.17832	11	7	2	4	0	252.92	1234	10.7901	6.68095	8.48299	7.02556	3.57779	4.45935	7.66037	34.2778	32.3077	22.0115	20.9043	24.8	25.6531	264.493	225.111	207.105	206.74	202.58	156.837	143.099	143.982	151.404	153.714	155.851	158.444	160.058	162.433	32.9424	17.2881	-7.28807	-11.1221	-27.7215	-44.07	-31.0933	46.4705	4.41667	-5.16667
685	CCOC(=O)c1cnn(-c2nc(-c3ccccc3O)c(C#N)c(=O)n2C)c1N	21.12	21.3558	254.342	6.5683	17	10	6	4	0	301.75	1214	10.8636	5.10891	5.05882	6.85795	5.23817	4.16667	4.95817	27.5909	28.5435	25.809	25.4948	18.3762	18.4588	237.411	233.099	220.808	203.848	177.548	164.778	151.32	157.987	158.784	164.95	160.68	163.179	167.238	165.16	78	98	31.25	-58.75	-109.25	-46.25	-67.75	-78.75	17.6942	8.59504
2776	Cc1cccc(OCc2ccccc2-c2nnc(Cc3cccnc3Cl)o2)c1	11	22.0178	304.135	6.74709	23	6	3	2	1	146.033	1374	8.33924	4.68038	4.24935	3.17463	2.90572	2.60691	2.66784	29.8696	28.0612	21.625	19.0962	18.8025	18.907	250.947	219.985	194.336	215.589	212.572	158.495	143.758	149.859	152.423	159.399	162.978	156.817	152.973	155.122	58.0618	2.76721	-38.7641	6.9	-15.9962	-9.69045	1.59565	-31.5198	7.59546	-3.33837
3965	CC(=N\NC(=O)c1oc2ccccc2c1C)/C(Cl)=N/Nc1ccc([N+](=O)[O-])cc1	5	22.334	3142.36	9.11744	15	10	5	4	1	290.339	1490	10.5246	5.40419	4.76973	6.45197	3.99361	3.90979	3.05641	33.1111	30.0426	26.0787	21.4479	23.6522	22.4203	247.339	225.166	188.694	194.44	202.475	162.976	150.297	152.944	158.28	164.397	164.62	165.906	163.211	159.413	67.0555	43.3149	-47.419	-106.569	-50.3958	-9.11365	-48.0795	14.9389	9.87556	-4.66667
3568	CCOC(=O)C1S/C(=N\N=C2/c3ccccc3-c3nc4c(nc32)c(C)nn4-c2ccccc2)NC1=O	8	28.8747	1351.5	8.48991	21	11	7	3	0	266.281	1710	10.2263	5.67769	5.8477	4.84148	3.3695	3.09402	3.23398	31.0909	30.85	27	26.3694	22.562	21.931	256.867	231.588	240.376	239.666	222.06	160.467	146.879	151.764	159.865	160.19	159.111	155.878	157.518	156.529	93.3431	91.4916	22.4515	2.94659	-76.4909	-97.3813	-111.369	-27.5871	16.8975	14.2959
2584	CCOC(=O)C1C(c2ccccc2Cl)N(N=O)C(c2ccccc2Cl)C(C(=O)OCC)S1(=O)=O	12	25.6836	380.206	7.16449	12	12	2	7	2	376.505	2194	9.24383	3.68203	2.17434	6.72329	5.96937	3.94094	3.44822	39.1786	34.1552	28.2411	31.5817	20.766	21.4682	242.987	221.295	236.029	213.977	189.968	161.106	144.287	151.635	156.973	158.655	156.474	159.91	160.219	161.051	52.1582	53.7937	-49.1239	115.715	134.104	-29.1177	-324.317	-307.816	16.5638	16.5383
169	N#Cc1ccc(Nc2nc(Oc3ncnc4ccccc34)nc(N3CCN(C(c4ccccc4)c4ccc(Cl)cc4)CC3)n2)cc1C(F)(F)F	28	39.8394	500.228	7.8245	34	14	9	1	4	448.234	2360	10.4105	5.499	6.10248	5.82123	3.0339	3.13828	3.07747	30.6494	29.3614	22.2951	20.7451	19.1667	21.7409	253.6	223.056	203.854	194.692	183.513	165.231	147.714	157.766	156.951	163.062	163.841	161.813	165.872	162.654	80.3762	96.4282	64.8008	39.3728	-37.287	-52.4127	153.685	105.408	8.43549	-1.99781
557	Cc1nn(-c2ccccc2)c(Cl)c1/C=C/C(=O)C1C(=O)NC(=S)NC1=O	22.1	20.1722	221.926	6.35786	11	9	4	3	1	244.991	1558	10.0525	5.2496	5.98803	6.28183	3.59929	3.1797	4.18158	39.9487	31.8293	27.7765	28.9157	21.5072	27.5846	264.796	233.949	215.176	222.896	198.976	159.904	147.832	151.216	157.42	160.075	158.41	154.635	157.598	163.568	42.6804	3.60271	-52.5918	-0.940106	-45.5327	-18.1105	48.9804	57.3661	7.26036	-2.12426
3734	CCCCCCCC(O)CCCCCC1CC(=O)NCCCN(C)CCCCN(C)CCCN1C	7	25.2552	1678.1	8.67818	0	6	4	2	0	235.083	1428	2.92632	0.984663	1.06725	2.47456	1.88184	1.83589	1.90245	15.0316	18.0316	9.88931	9.05556	9.41104	9.35965	163.716	131.405	118.508	118.259	123.38	168.294	149.056	161.251	164.218	166.005	166.13	168.195	167.05	165.624	43.6947	-49.8326	-32.2617	31.1877	20.6114	-26.6035	-35.6511	5.40421	7.63158	-12.5512
3986	c1ccc(CN2C(c3ccccc3)C3=C(NOC3c3ccc4c(c3)OCO4)C3CCCCC32)cc1	5	28.587	508.168	7.48357	18	5	2	3	0	169.056	1400	6.73846	3.02756	2.41176	2.60085	2.27199	2.243	2.14118	21.5385	24.8028	16.7135	15.5485	14.3976	12.3059	227.29	196.583	190.539	188.404	180.098	158.926	143.494	149.613	153.885	158.797	156.487	155.83	154.867	157.768	60.4507	9.07361	10.8821	-1.77893	-18.2568	-45.174	-49.543	-27.7858	14.214	4.55408
2049	Cc1cc(/N=C2\C(=O)N(S(C)(=O)=O)c3ccc(OC(F)(F)F)cc32)ccc1N1C(=O)c2ccc(Cl)cc2C1=O	14	31.3592	416.866	7.39374	18	14	3	6	4	564.839	2234	13.8157	8.25244	6.63679	10.46	4.6145	5.01275	4.9378	41.3704	37.5862	30.4454	29.4	27.6053	26.4118	272.488	262.67	226.257	218.245	226.06	164.374	144.99	156.042	153.602	155.71	160.527	159.845	158.301	161.45	67.3095	170.438	-67.2107	-41.1566	-201.871	-180.545	123.923	53.4615	7.73388	9.40604
2530	CCN1C(N2CCN(C(=O)N/N=C/c3ccc([N+](=O)[O-])s3)CC2)=NS(=O)(=O)c2ccccc21	12	25.7976	4095.29	9.51152	11	14	7	5	0	380.47	1880	9.83128	3.42995	3.82555	7.04573	3.37404	3.21164	2.68358	34.8148	35.193	25.1825	22.6444	14.971	17.9439	234.783	206.098	179.257	164.491	144.564	165.055	150.511	159.897	160.956	164.41	166.195	162.015	167.067	164.886	41.2899	83.9204	-12.1413	-115.218	-133.256	-71.8669	75.7961	112.935	10.6204	3.69444
1029	Cc1cc(=O)oc2cc(Oc3nc(Nc4ccc(N5C(=O)CSC5c5cccc(F)c5)cc4)nc(N(C)C)n3)ccc12	19	33.6073	902.637	8.2404	28	12	6	4	1	353.309	1992	9.94693	5.93187	5.50852	5.27327	3.54047	3.75412	3.4155	29.7313	29.6806	24.2808	21.5488	20.781	19.7956	247.491	231.564	206.921	195.864	203.238	161.894	146.617	154.914	154.856	160.65	158.695	162.722	161.765	158.982	110.844	74.4458	-79.5354	-11.5432	-129.386	-57.4506	-60.2669	-7.58699	14.6237	0.477389
528	Cc1ccc(-[n+]2noc(O)c2CN2CCNCC2)cc1	23	15.6538	148.11	5.6911	11	6	4	2	0	131.639	847	6.76923	2.46575	1.13846	3.37536	3.23037	2.99201	2.20513	21.7179	24.5854	16.0217	13.1373	13.9315	10.1846	203.227	173.245	157.168	170.811	152.995	166.78	152.247	160.552	162.755	166.375	166.507	166.992	166.68	161.866	51.67	24.4773	11.4076	42.7574	8.7311	-134.479	-110.688	-56.188	8.37278	-1.50296
1977	O=Nc1c(-c2ccc(-c3cc4ccccc4oc3=O)cc2)nc2sc(Cc3noc4ccccc34)nn12	14	30.151	584.165	7.67852	33	10	5	4	0	268.281	1744	11.5085	7.91165	8.84388	5.15925	3.65355	3.57727	3.81513	33.5385	32.7759	26.2672	25.1695	25.3976	25.2025	280.387	251.835	228.651	232.932	243.369	155.818	143.443	145.46	151.532	155.194	157.287	156.756	153.597	154.956	58.6423	24.8383	12.1992	-80.6095	-76.0388	-52.7995	0.174885	68.7666	9.63536	-1.49482
447	CCOC(=O)c1cnn(-c2nc(-c3ccccc3Cl)c(C#N)c(=O)n2C)c1N	23.88	21.3558	254.342	6.5683	17	10	6	3	1	266.561	1438	10.549	4.88431	4.729	6.19909	4.56803	3.84335	4.45283	33.4419	30.2	28.2299	28.4194	20.5979	21.3171	248.897	241.808	234.355	213.293	185.863	163.907	150.405	157.853	158.56	164.667	159.581	162.883	165.865	164.44	79.6221	95.6478	39.2377	-52.0084	-115.829	-85.8122	-51.9583	-52.4322	16.7123	8.80043
1352	Cc1c(C(N)=O)sc2nc(SCC3CO3)n(-c3ccccc3)c(=O)c12	17	19.913	241.317	6.4024	15	8	3	3	0	207.59	1478	8.97222	3.62452	2.96429	5.18975	3.86271	2.89017	2.71318	36.95	33.1163	31.2593	31.5765	23.5287	15.881	255.968	247.907	229.577	226.629	210.448	158.35	144.72	150.029	151.558	153.499	158.805	154.08	150.103	154.83	50.1397	24.8694	1.74472	7.90139	-118.088	-55.1314	-77.0481	1.70111	11.7519	5.66875
632	CCOC(=O)CC(=O)c1ncccn1	22	10.0778	71.5548	4.60694	6	5	2	3	0	167.083	624	10.0833	2.52174	0.705882	6.96181	3.74479	4.42029	2.97059	26	26.5	19.3023	22.7576	15.7391	11.8824	219.095	176.13	170.047	147.092	153.808	165.382	148.333	160.504	167.23	162.766	162.99	165.112	172.034	167.961	41.75	20.6875	-27.8125	-17.6875	10.875	-0.75	-91.0625	-61.6875	3.25	1.02083
885	O=S(=O)(Nc1ncccn1)c1ccc(/N=C/c2c[nH]c3ccccc23)cc1	20	21.3886	259.717	6.55284	21	8	5	2	0	221.272	1328	9.34392	4.71795	4.0398	5.26837	3.8748	3.24065	2.85273	31.619	34.3556	23.9222	21.9091	19.9538	17.4776	256.172	220.084	193.8	211.876	218.333	159.935	145.86	151.3	155.548	161.553	159.778	159.484	154.4	156.677	-3.63416	9.83296	-47.0408	-21.6233	27.2263	-13.7181	-65.9995	7.70471	3.9949	-5.40816
2326	CC(=O)OC[C@H]1O[C@@H](Oc2nc(-c3cccs3)cc(-c3ccc(Cl)cc3)c2C#N)[C@H](OC(C)=O)[C@@H](OC(C)=O)[C@@H]1OC(C)=O	13	33.895	533.515	7.76109	17	14	2	10	1	439.675	2390	10.2542	6.15805	5.36607	6.19261	4.19133	4.44554	4.35697	33.662	30.4054	24.2115	25.2683	24.0733	22.3154	243.606	216.266	211.347	204.88	208.821	159.846	143.621	152.891	158.073	154.074	157.385	159.739	157.844	158.033	111.194	18.8247	-154.087	53.3475	105.522	-89.7194	-107.163	-123.3	13.6568	7.65662
2020	N#Cc1c(-c2ccccc2)cc(-c2ccco2)c([N+](=O)[O-])c1N	14	17.7228	165.14	5.9397	17	6	3	3	0	252.722	962	11.1765	4.61194	3.51923	7.43301	5.56689	4.40796	4.17308	28.2941	29.1667	23.5634	25	17.4478	14.3654	262.377	247.713	222.211	210.441	179.778	158.226	145.811	144.517	150.208	153.912	157.193	159.023	162.176	165.315	27.308	22.0934	20.2561	15.9446	-38.6609	-33.7093	-65.9481	-27.0519	8.96713	3.05017
943	CCOC(=O)c1cnn(-c2nc(-c3ccco3)c(C#N)c(=O)n2C)c1N	19.85	19.8726	225.496	6.37382	16	10	6	4	0	269.222	1140	11.6	4.86207	5.18841	6.73056	4.72854	3.94891	4.76812	28.5	29.5	26.5195	27.5732	17.5517	18.1014	238.422	230.094	223.788	198.9	169.118	165.67	152.271	160.439	161.477	166.296	161.589	163.794	168.83	165.245	81.32	92.88	20.52	-58.28	-105.96	-59.12	-47.08	-43.96	16.125	9
2416	CC1=NC(=S)N(n2c(CCl)nc3ccccc3c2=O)C(=O)C1/N=N/c1ccc(O)c([N+](=O)[O-])c1	12	26.4838	746.814	7.83959	16	14	7	5	1	375.075	1942	12.2094	6.12	6.07667	7.81405	4.34935	3.72428	3.91333	40.4583	33.5686	31.2692	31.1964	26.48	24.25	266.488	248.009	234.665	242.242	224.407	162.628	150.442	154.684	161.752	162.837	162.145	159.168	158.868	162.491	67.5257	61.8042	-21.8759	-48.8299	-105.455	-61.5837	-37.5501	-37.2846	11.25	2.80556
4420	CC(C)(C)n1ncc2c(NCc3ccccc3)ncnc21	0	16.5573	328.197	6.53555	15	5	5	0	0	111.174	840	6.65	3.01515	2.6	2.77934	2.43669	2.62753	2.28056	21	24.0476	17.4	13.1818	14.3636	12.6333	214.586	190.759	166.634	161.505	166.988	164.959	149.675	158.226	159.516	170.007	161.684	163.845	168.16	162.748	69.625	44	-0.125	-7.875	-105.438	-36.6875	-60.875	5.5	10.9062	-2.5
2259	Cc1ccc(-c2csc(NC(=O)C3=NNCC3c3ccccc3)n2)cc1	13	20.5631	206.796	6.28725	17	6	4	1	0	165.392	1254	7.60101	4.33333	4.06349	3.75892	3.05951	3.09069	2.86596	28.5	28.4043	19.4948	20.4141	20.9265	19.5714	245.824	207.835	183.362	194.123	200.707	159.14	145.408	149.402	154.678	157.698	162.221	161.342	160.616	155.884	41.0815	0.129017	-19.3414	16.0581	13.219	-19.4164	-33.742	-21.5108	8.04132	-3.19835
1694	Cn1cc(CCC(=O)NCCCc2c[nH]c3ccc(Cl)cc23)c2cc(Cl)ccc21	16	22.8628	1587.64	8.43471	18	6	3	1	2	164.372	1640	6.36942	2.84667	3.01058	3.16099	2.32253	2.47459	2.99577	31.5385	26.8727	18.776	16.3511	15.58	18.619	238.656	200.534	161.977	149.28	158.165	160.094	145.297	151.567	155.438	158.348	159.809	164.22	163.644	162.747	54.3599	4.03755	-81.9758	-119.517	-23.1224	76.8451	43.5734	-55.2157	9.87833	-1.68195
1459	CCO/C=N\c1scc(Nc2c(C)n(C)n(-c3ccccc3)c2=O)c1C#N	16.2	20.5107	519.373	7.24587	16	8	5	2	0	207.865	1332	8.40097	3.67657	3.16279	4.51879	3.30296	3.19102	2.9578	28.9565	28.7917	23.989	22.0891	17.1881	16.2907	236.599	220.923	195.098	203.222	175.941	162.108	148.052	156.65	159.64	158.972	160.964	156.772	158.398	161.077	79.7217	54.6906	-2.21592	-62.1002	-55.6259	-29.3548	28.7259	-37.4115	17.1474	8.79159
2357	COc1ccc(-[n+]2noc(O)c2Cn2c(-c3ccccc3Br)nc3ccccc32)cc1	13	24.644	368.541	7.04095	26	8	4	3	1	183.662	2459	9.083	5.60193	4.43145	3.7482	3.23813	3.2035	3.28599	50.1837	31.4528	27.7714	25.9739	27.2017	26.693	257.678	236.762	222.512	218.917	217.567	158.891	146.266	151.32	154.906	159.458	156.058	156.517	157.193	158.693	58.0813	23.6157	-36.8983	-87.5182	31.5662	66.4403	-13.0838	-125.377	13.8401	2.64307
857	O=c1oc2ccccc2cc1-c1nnc(Sc2nc(Oc3cccc4cccnc34)nc(N3CCN(c4cccc(Cl)c4Cl)CC3)n2)o1	20	38.8551	569.469	7.91332	37	15	8	4	2	280.458	2692	10.3951	7.65414	7.84152	4.00655	3.11799	3.26438	3.47379	38.4571	33.2078	28.4783	26.2727	28.8722	30.4806	272.524	238.4	218.148	221.324	234.725	158.968	145.723	153.155	155.603	159.733	160.357	159.776	161.615	157.656	86.0722	57.4545	42.4583	8.00383	52.567	47.1524	-9.57136	-98.4287	9.97714	-0.484082
2507	CCCC[n+]1ccc2c([nH]c3ccccc32)c1C(=O)/C=C/c1cc(OC)c(OC)c(OC)c1	12	25.2417	1018.35	8.11986	19	6	2	4	0	214.306	1355	7.12903	3.15663	3.23649	3.45654	2.73943	2.6834	2.61449	21.8548	24.3846	19.8209	18.4834	13.4759	14.2162	220.783	214.21	181.473	173.947	158.371	160.489	144.92	153.933	154.025	154.773	158.585	156.891	160.816	158.937	98.2737	71.0291	82.1165	-39.9563	-195.846	-98.5068	84.7992	18.9958	23.1225	16.1142
2079	COc1ccc2nc(C)cc(-n3cc(CN4CCN(C)CC4)nn3)c2c1	14	20.6036	332.144	6.76108	15	7	6	1	0	135.167	1066	7	2.90722	2.53247	2.70333	2.72762	2.40893	2.45563	21.32	24.6038	17.3947	14.0294	13.9381	15.2597	209.382	195.447	159.054	170.823	152.53	166	150.556	162.158	159.814	162.867	166.719	165.283	169.527	159.901	88.6128	10.7344	-19.5136	80.6336	41.9376	-66.5872	-79.2928	-115.605	13.6288	0.7824
4395	O=C(N[C@@H](Cc1ccccc1)C(=O)O)OCc1ccccc1	0	16.5512	146.771	5.77733	12	5	1	4	0	226.889	934	8.20513	4.13636	3.69643	5.81766	4.31291	4.17845	3.5625	23.9487	25.125	16.5	15.0112	16.4545	15.8571	226.592	181.703	169.607	179.614	168.137	160.312	145.06	150.379	156.495	163.158	163.592	161.68	163.447	157.887	19.4385	-14.1624	-40.4918	-3.97107	87.6614	-40.2827	-68.7751	-31.2117	1.99408	-7.53846
1277	CCOc1ccc(C2C3CNc4c(cccc4[N+](=O)[O-])C3=NN2c2ccccc2)c(OCC)c1	18	26.6844	477.613	7.39258	18	8	4	4	0	270.056	1414	8.3	3.87166	3.30601	4.50093	2.87734	2.7038	2.58865	23.5667	25.9688	19.5448	20.7933	15.9786	14.5574	227.641	205.955	202.799	185.384	181.246	161.521	146.843	152.342	158.255	157.465	156.399	158.521	158.759	158.733	89.3711	70.2233	6.36111	-47.3667	-67.2078	-74.4222	-54.2922	-2.76333	18.36	16.19
1965	Cc1nn(C(=O)c2ccc(Cl)cc2Cl)c2c1nnc1cc(Cl)c(F)cc12	14.05	20.7985	230.165	6.39431	19	9	4	1	4	211.988	1828	12.024	5.77778	3.74135	6.23494	4.79359	4.11324	3.14194	53.7647	37.1892	37.0548	37.6667	33.4355	29.1148	303.737	280.779	265.773	269.561	252.195	160.979	146.185	149.87	157.657	162.788	161.105	156.481	153.979	162.799	46.5467	35.5029	-10.9058	-46.6552	-44.3956	-67.7783	-31.9627	-4.70486	7.24567	-0.145329
2469	C=C1C(=O)[C@@]23CC[C@H](C(=C)C)[C@@](C)(CCC(=O)NC4CCCCC4)[C@@H]2CC[C@@H]1C3	12	22.9655	1862.15	8.5942	0	3	1	2	0	217.597	1152	4.08824	1.62564	1.52571	3.19996	2.09296	2.47123	2.62341	16.9412	20.0423	13.289	10.7206	10.6615	10.2971	189.703	171.82	131.079	115.918	132.359	163.097	143.67	150.652	155.365	160.069	161.467	166.99	163.775	165.798	68.0683	26.1531	-53.1125	-95.1176	-18.801	32.6903	-2.38149	-56.141	21.383	0.0157872
183	Cc1ccc(-n2nnc(C3=NNC(c4ccccc4)C3)c2C)cc1	28	19.1085	205.565	6.20123	17	5	5	0	0	120.944	948	7.16279	3.6338	3.16176	2.81266	2.38824	2.56651	2.59559	22.0465	25.1304	17.9583	16.0673	16.1268	14.9853	229.162	201.9	169.699	166.263	182.43	162.296	148.151	152.463	157.507	163.051	165.131	164.989	161.668	160.484	67.4213	26.5587	-45.7042	-34.7047	-23.431	-14.8459	-29.1996	-64.0395	11.5998	-2.17307
673	CC(NCCC(=O)c1ccccc1)C(O)c1ccccc1	22	15.7632	132.636	5.62954	12	3	1	2	0	172.639	846	5.7619	2.38462	2.72308	4.11045	2.35789	2.8433	2.6359	20.1429	22.2558	14.56	12.7864	11.5	12.7846	213.147	170.579	141.029	132.752	142.524	160.66	144.383	150.44	158.784	160.633	162.339	164.351	162.767	158.259	23.1451	-13.3107	-26.1066	-49.9569	-16.39	-10.5465	13.2245	23.576	5.8237	-6.82256
2806	O=C(Cn1c2ccccc2c2nc3ccccc3nc21)N1N=C(c2cc3ccccc3o2)CC1c1ccccc1	11	32.8986	816.72	8.09159	32	7	5	2	0	230.861	1584	9.01587	5.70732	5.18935	3.66446	3.40018	3.13753	2.87081	25.1429	27.7	21.2157	20.4645	19.6829	18.3077	259.37	224.599	212.439	222.612	215.622	156.578	143.056	147.777	155.852	156.491	158.195	155.768	155.586	155.463	70.1499	27.8604	-12.6757	-50.252	-10.9234	-18.8869	-64.9957	-29.9363	13.5714	2.12245
2053	COc1ccc(Cc2ccc(OC)c(C3SC4C(=NN(C)C4c4ccc(F)cc4)N3c3ccc(C)cc3)c2)cc1C1SC2C(=NN(C)C2c2ccc(F)cc2)N1c1ccc(C)cc1	14	50.8401	1014.37	8.76257	36	12	6	2	2	404.701	2980	7.55756	4.21569	3.36118	3.64596	2.45682	2.68459	2.51846	26.8468	27.5167	23.0977	20.8742	19.3743	16.3842	239.024	230.752	208.235	203.768	207.535	160.384	144.123	151.467	152.599	155.069	154.312	156.793	153.833	156.661	149.913	-8.36545	-173.055	-58.7101	90.2776	-13.3852	-138.715	-167.735	35.4682	10.3667
1507	CC(C)(C)CCNc1c(-c2nnc(S)n2-c2ccccc2)cnc2c(C(F)(F)F)cccc12	16	26.1336	414.924	7.22202	21	9	5	0	3	332.652	1632	9.0405	4.33099	4.0828	5.836	3.29179	3.01784	3.47237	28.6316	27.2	21.0299	18.2143	20.1197	19.2293	232.542	212.369	200.996	200.975	207.648	167.636	148.101	157.577	155.517	167.959	164.708	163.11	159.743	161.032	105.152	155.215	141.516	246.215	13.5691	-88.4706	-165.126	-143.518	13.615	3.95568
1646	CSc1ccc(C2CC(c3ccc(Cl)cc3)=NN2c2nc(-c3ccc([N+](=O)[O-])cc3)cs2)cc1	16	26.9556	437.381	7.30458	23	9	4	2	1	244.457	2044	8.53762	5.45926	4.05882	4.61239	2.47539	3.09663	2.64601	38.566	32.9298	24.9487	23.088	28.3238	24.3529	269.473	236.121	200.575	223.362	252.339	156.264	143.054	146.296	152.287	154.611	158.351	154.856	150.264	151.324	57.39	32.63	-48.8962	-46.4471	21.7614	22.6904	-21.2886	-55.3645	9.73834	-5.25276
4146	COc1cc2cc(OC)c3oc4ccccc4c4ccc(c1=O)c2c34	4	20.2111	193.661	6.1824	20	4	0	4	0	170.306	1026	10.1026	3.47619	2.16667	4.36681	3.26526	2.93485	2.89394	26.3077	28.186	26.4138	23.701	14.9167	12.2576	261.4	276.448	219.915	203.46	169.618	153.675	139.688	146.042	144.661	146.295	151.689	151.351	156.029	160.499	61.5963	33.2209	30.7456	-53.1867	-108.228	-64.0427	-10.5799	-54.4556	17.5562	13.0888
2962	COCCn1c(S)nnc1-c1cnc2c(C(F)(F)F)cccc2c1N1CCN(C2CCCCC2)CC1	10	28.4448	592.298	7.66494	15	11	6	1	3	343.34	1788	8.22849	3.59855	4.01709	5.12447	2.63275	2.62283	3.34512	26.6866	26.2676	18.4857	17.5829	16.8945	18.4615	214.264	189.58	173.667	164.867	166.796	169.749	149.594	162.16	161.338	163.811	163.588	166.875	167.187	167.231	111.92	133.982	102.269	143.789	116.039	-28.6395	-60.7019	-58.031	16.0535	11.1987
797	CCN[C@@H]1C[C@H](N)[C@@H](O[C@H]2OC(CN)=CC[C@H]2N)[C@H](O)[C@H]1O[C@H]1OC[C@](C)(O)[C@H](NC)[C@H]1O	20	25.1594	323.244	6.97233	0	12	5	7	0	307.868	1490	5.83784	2.32922	1.94981	4.16038	2.72095	2.81059	2.71536	20.1351	22.2895	16.4976	13.6446	12.963	11.5676	174.319	156.384	138.397	129.457	137.808	170.252	154.187	159.967	165.109	168.339	166.781	169.531	167.771	169.918	52.5004	25.4178	49.7202	-93.2936	-56.3207	-18.824	-72.8678	-22.7027	19.5	-1.5
671	COc1ccc(NC(=O)CNc2ccc(-c3nc(N4CC(C)CC(C)C4)nc(N4CC(C)CC(C)C4)n3)cc2)cc1	22	32.2454	2730.79	9.32333	18	9	7	2	0	248.833	1666	5.92857	3.22581	2.15126	2.9623	2.55048	2.579	2.22724	19.8333	22.8636	15.2339	12.5315	17.2097	13.5882	202.68	173.301	168.875	159.916	199.614	164.982	148.279	157.913	159.112	169.228	160.705	170.776	156.044	160.528	124.163	87.9592	62.4694	54.3673	-3.38776	-150.776	-211.98	-231.286	16.7778	-3.72222
1008	N#Cc1cncn(-c2nc3ccccc3s2)c1=O	19	14.0898	102.702	5.21962	15	6	4	1	0	157.559	954	11.9352	6.14286	3.6	6.56496	4.5631	4.45238	4.01667	39.75	36	31.5745	32.1628	20.4286	15.4	293.964	261.327	270.232	269.611	213.503	157.032	144.454	149.986	151.747	161.769	153.362	152.368	156.743	159.748	13.6867	-6.71914	23.9529	5.39429	-5.21836	-21.3773	-27.9599	-27.5031	4.01389	-1.55556
1193	CC(=O)NC=C1C(=O)NC(=O)NC1=O	18	10.3656	73.8025	4.63786	0	7	3	4	0	243.639	662	13.4286	2.6	3.81818	11.6019	9.78535	5.43333	6.72727	31.5238	30.1429	23.9487	25.1765	12.9	12.3636	227.51	201.189	170.889	180.407	125.918	169.405	157.52	162.422	165.869	170.769	169.617	166.3	179.612	173.424	27.4286	18.2449	-63.4898	43.8367	-6.73469	-6.12245	-84.7347	43.2245	2.33333	-1.66667
3337	COc1cccc(-c2nc(NN)n(C)c(=O)c2C#N)c1OC	9.15	16.1992	134.659	5.6912	12	8	5	3	0	209.444	956	9.89189	3.57692	0.952381	5.66066	4.01465	4.14423	3.72751	25.8378	27.2632	26.8529	23.679	16.2179	12.0159	223.277	247.731	194.132	166.665	150.905	166.525	153.208	162.573	154.652	161.247	159.156	165.35	167.891	172.558	69.5595	51.9693	25.3185	-80.1644	-69.2096	12.1877	-47.7348	-207.831	17.8802	9.42221
3994	COc1ccc(C2CC(=NOC(=O)c3cccc(O)c3)CC(c3ccc(OC)cc3)N2C)cc1	5	26.2889	562.404	7.556	18	7	2	5	0	253.028	1418	7.80645	4.21769	4.03974	4.08109	2.71886	2.84996	2.92016	22.871	25.0769	18.9929	15.5536	16.8027	16.649	223.772	208.81	163.695	168.631	184.49	160.498	144.851	152.919	153.853	157.896	160.42	160.777	158.276	157.912	77.9802	-16.4454	-83.4131	-39.7523	81.1967	-22.41	-42.872	-32.0812	15.3455	-5.69823
3343	CC(C)(C)C(=O)Nc1nnc(-c2ccc(NC3CCCCC3)c([N+](=O)[O-])c2)s1	9	21.8352	243.866	6.52624	11	9	5	3	0	275.955	1402	7.36688	3.94175	3.55144	5.20669	3.39033	3.71317	3.63214	26.4528	26.5273	17.2963	15.0195	16.8447	18.4074	212.952	174.661	183.325	191.705	167.064	165.131	149.308	153.943	159.185	170.324	162.131	161.264	165.047	161.225	86.7372	86.5436	72.5357	79.7085	43.2643	-66.3342	-98.3384	-102.29	9.86116	-7.17444
1021	NS(=O)(=O)c1ccc(NC(=S)Nc2ccc(C(=O)NCC(=O)O)cc2)cc1	19	20.6113	324.828	6.77655	12	11	4	5	0	338.23	1620	9.64858	4.85812	4.56085	7.86581	3.50796	3.92524	3.96625	37.6744	35.5227	23.0652	21.6129	24.3538	26.619	244.706	207.923	184.217	191.181	201.457	162.192	149.722	152.188	157.596	161.022	161.408	159.338	158.825	159.66	-6.9116	12.8854	-90.0174	-63.4355	38.8082	55.4363	-41.1561	-8.66102	1.64089	-10.2077
4483	CC1=C(Br)C(=O)C(C(C)(C)CC(=O)O)=C(C)C1=O	0	13.5072	93.0695	5.12113	0	5	0	4	1	238.391	1964	8.15355	3.43682	0.314286	7.22396	3.63275	6.28459	1.93519	59.5152	29.1515	30.9189	22.7059	29.2941	5.42857	228.514	235.869	164.104	115.028	150.32	160.711	143.14	151.512	147.846	158.24	159.538	170.396	161.32	178.794	68.11	51.0437	-51.4697	-101.026	-189.385	108.397	-0.845597	66.1569	13.1818	0.165289
2840	CCCCc1nc(Cl)c(-c2cc(-c3cccs3)nc3c2C(=O)c2ccccc2-3)n1Cc1ccccc1	11	28.7653	683.986	7.80887	28	6	3	1	1	195.564	1860	7.30082	4.00166	3.19516	3.2594	2.83508	2.55127	2.58893	31	28.6154	21.9362	22.5986	24.9441	19.6321	258.31	223.595	237.998	254.066	232.818	155.609	140.878	146.84	153.096	154.663	154.167	150.288	149.949	153.458	78.6762	91.0248	100.069	63.3091	20.8075	-77.7273	-141.497	-133.05	17.6389	16.4433
4501	C/C(=N\NC(=S)Nc1ccc(C(=O)NCC(=O)O)cc1)c1ccc(Cl)cc1	0	20.3744	196.603	6.27444	12	9	4	3	1	242.713	1598	8.54658	4.25765	4.37407	5.51621	3.04826	3.35234	3.36418	36.3182	29.4667	22.9111	20.4667	22.2754	23.95	247.157	209.711	182.511	184.157	194.282	161.425	149.185	152.579	158.224	161.184	161.752	161.908	161.084	156.871	33.6831	-17.9808	-83.0317	-58.2798	55.8345	29.192	-18.1859	-25.3986	4.20713	-9.15754
3232	CCn1c(=O)n(C2CCN(C3CCc4cc(OC)c(OC)cc43)CC2)c2ccc(Cl)cc21	10	25.2702	375.541	7.09152	15	7	3	3	1	190.839	1558	6.54202	1.61761	2.1652	3.07804	2.12889	1.77706	1.96146	25.129	25.0909	18.5875	16.8297	10.8298	12.1579	216.186	198.105	161.579	149.67	128.649	162.51	146.091	156.718	157.946	157.084	160.28	160.526	164.681	168.407	100.182	60.9378	-12.9137	-160.805	-217.79	-94.1349	73.1459	64.2372	22.2456	11.103
110	Fc1cc(-c2nc3scc(-c4cc(F)c(Cl)cc4Cl)n3n2)c(Cl)cc1Cl	30	20.8389	200.546	6.25655	20	10	3	0	6	213.219	2302	12.8021	8.31687	7.28844	6.87803	4.06941	3.80772	3.52687	74.2581	45.2059	47.0781	50.5424	55.1944	49.4848	342.851	307.748	294.853	307.208	324.901	160.455	144.318	148.031	156.206	161.136	162.572	158.822	151.557	149.139	17.8732	-3.09607	-50.3848	-19.473	4.74268	-19.7349	-8.74691	3.76814	1.22893	-6.00832
3464	O=C1CC(c2ccccc2Cl)N(Cc2ccccc2)C2CCCCC2N1	9	20.5227	220.859	6.35304	12	4	2	1	1	152.005	1268	5.3648	1.97502	1.32323	2.9805	2.39384	2.2651	2.10938	24.8627	24.1296	16.3851	15.0602	13.9527	11.5804	221.597	181.896	173.144	173.591	161.956	160.559	144.069	151.014	158.542	160.811	159.085	157.614	158.515	161.172	35.2188	-16.221	-17.7041	-6.90727	1.83974	-46.995	-47.686	-34.9523	7.49481	-2.4752
1452	CC(C)CCC[C@@H](C)[C@H]1CC[C@H]2[C@@H]3C=C4N=C(N)O[C@@]45C[C@@H](Cl)CC[C@]5(C)[C@H]3CC[C@@]21C	16.5	25.8581	1428.33	8.42741	0	4	2	1	1	153.248	1504	3.47539	0.911356	0.69401	1.99024	1.62068	1.67494	1.59218	19.5325	20.6914	14.1107	11.6647	9.61765	8.73047	187.847	176.178	129.017	121.808	127.398	164.255	144.779	151.546	154.864	159.085	163.223	166.042	163.635	166.031	94.3196	93.8618	-6.78385	-54.1022	-43.5747	-8.05358	-36.6315	-39.2362	29.4171	9.6986
4004	O=C(/C=C/c1ccccc1)c1ccco1	5	11.3827	76.6117	4.74421	11	2	0	2	0	119.583	606	8.4	4.61538	2.625	4.78333	3.56667	3.67949	2.86111	24.24	25.8462	16.7292	15.9756	18.6538	13.8333	249.974	191.554	181.893	192.939	204.875	154.736	139.984	144.079	153.868	155.139	156.231	155.505	154.661	154.304	15.2656	-12.456	-10.4912	-6.0704	1.416	2.688	-30.8544	-34.5456	2.0224	-4.144
3304	O=C1Cc2ccc(O)c(c2)-c2cc(ccc2O)C[C@@H](O)[C@@H](O)[C@@H](O)[C@H]1O	10	20.2816	164.461	6.05818	12	7	0	7	0	340.056	1152	8.6087	3.89262	3.24762	7.39251	3.94785	4.02274	4.64127	25.0435	25.5	20.0574	17.2245	14.7651	12.5524	221.375	202.563	178.524	178.805	148.88	160.991	145.644	146.753	154.452	158.959	158.803	158.045	161.994	168.348	1.90359	-34.5784	-19.5766	-12.4991	-11.6749	-64.6673	9.96975	35.6994	9.19849	-11.0699
4486	O=[N+]([O-])c1ccc(-n2cc(/C(Cc3ccc[nH]3)=N/O)nn2)cc1	0	17.7751	167.935	5.95649	16	9	6	3	0	249.167	1002	11.3714	6.66667	5.97872	7.11905	4.15491	4.49782	4.43144	28.6286	29.8108	21.2113	20.3067	21.1373	18.6809	240.323	207.457	181.415	205.227	192.44	166.226	154.709	153.914	161.573	166.171	170.053	167.411	166.199	165.847	31.8188	1.37306	-32.6335	-12.7959	-13.0473	-38.3976	-17.3355	6.42694	5.07592	-6.3698
2765	O=[N+]([O-])c1ccc(-c2nc3sc(Cc4noc5ccccc45)nn3c2Br)cc1	11	22.6725	309.445	6.7644	23	10	5	3	1	229.832	2576	12.0398	9.68164	8.54436	6.0482	3.10108	4.17356	4.08911	67.7895	38.881	36.85	38.1139	44.383	54.6744	292.107	258.827	239.037	256.08	271.32	157.656	146.596	147.607	153.54	158.267	159.515	156.465	157.283	154.222	39.6517	12.2574	-36.4656	-112.25	-37.551	67.0588	29.2033	-24.9815	5.16898	-2.44321
1102	Nn1c(SCC(=O)c2ccc(Cl)cc2)nc2sc3c(c2c1=O)CCCC3	18	20.6606	799.041	7.63892	15	8	3	2	1	197.901	1740	7.91652	4.58234	4.54281	4.71193	3.51665	3.76916	2.9806	41.4286	33.5333	27.57	27.4021	27.7231	21.6721	261.45	226.138	199.878	198.897	210.354	157.82	143.994	148.013	152.738	155.796	159.264	160.78	159.293	156.542	49.1732	40.4208	16.0424	-42.433	-53.8849	-69.2067	-29.6512	39.6835	9.45578	1.89796
2350	Cc1nn(CC(=O)N2c3ccccc3Sc3ccc(Cl)cc32)c(=N)s1	13	19.9939	212.809	6.27668	17	8	4	1	1	163.123	1686	8.53931	3.99858	3.10758	4.29272	3.04948	2.91738	2.68963	44.3684	35.6098	29.9268	27.5542	26.2179	31.9683	276.08	251.994	238.21	204.955	212.553	157.175	144.709	149.341	154.382	152.874	152.919	157.492	160.322	155.953	37.2649	-0.814199	-10.541	-19.9355	-16.5729	-9.8261	-53.5161	-50.8568	9.04917	2.85249
2994	COc1ccc(-[n+]2noc(O)c2Cn2c(-c3ccc(Cl)cc3)nc3ccccc32)cc1	10	24.6844	364.994	7.03128	26	8	4	3	1	184.339	1523	9.09398	5.55275	4.52437	3.76201	3.26052	3.23626	3.28738	31.0816	29.4151	23.7524	20.5826	21.9076	20.2544	253.608	231.74	213.35	210.718	210.746	159.475	146.512	151.622	155.412	160.295	156.726	157.258	158.146	159.611	57.2528	19.0218	-44.7139	-89.9858	39.2019	73.4757	-18.7239	-127.137	12.8401	0.643065
499	Cc1ccc(C2=NN(c3ccccc3)C(c3ccc(C)cc3)C2)cc1	23	19.856	208.449	6.25598	18	2	2	0	0	115.694	948	5.91489	2.77982	1.88136	2.46158	2.3344	2.38073	2.0904	20.1702	23.42	16.6147	14.521	14.6055	11.1356	232.157	203.523	179.003	203.475	194.067	157.594	142.28	148.088	153.102	157.657	159.511	152.459	152.362	157.892	54.947	1.5206	-43.4776	5.34586	14.9593	-37.0702	-56.9457	-47.1897	11.0923	-2.85152
2533	COc1ccc2nc(C)cc(-n3cc(CNCCCN(C)C)nn3)c2c1	12	20.0058	1306.43	8.13056	15	7	6	1	0	141.167	1068	6.5	2.56436	2.08791	2.71474	2.50676	2.40429	2.33791	20.5385	23.6111	16.6667	13.9924	13.3861	12.9231	202.525	187.045	164.177	154.077	150.212	166.728	151.233	162.417	160.152	165.668	163.662	167.833	167.08	166.818	91.8935	35.4556	18.9926	77.3506	39.1095	-37.0281	-65.0902	-82.0577	14.0503	4.71006
1911	O=C(CCNC12CC3CC(CC(C3)C1)C2)c1ccc(Br)cc1	15	17.856	842.162	7.52443	6	3	1	1	1	129.613	2046	4.58842	2.38148	2.42083	2.81767	1.83138	2.33617	2.42089	44.4783	25.3673	15.0405	10.4051	15.225	18.1594	216.434	163.829	129.576	130.934	156.374	160.508	142.772	148.771	157.398	165.077	164.1	164.706	161.648	155.36	30.0568	-21.052	-35.3127	9.9524	18.4881	46.0905	2.44369	-25.3383	4.67675	-10.0397
978	CCn1cc(C(=O)NNC(=S)/N=c2\[nH]c3ccccc3[nH]c2=O)c(=O)c2ccc(C)nc21	19	25.0126	1018.75	8.08948	20	11	7	3	0	283.486	1566	9.65577	4.2451	5.4375	5.55855	3.94521	3.57565	3.64576	30.7059	28.9815	24.115	23.0776	19.6961	21.8625	243.796	220.37	200.855	187.868	165.555	163.107	151.081	156.133	159.964	161.475	161.718	161.747	168.082	164.246	74.5099	64.3045	17.0745	-44.8948	-82.0453	-109.392	-2.88671	95.6222	12.7832	2.54748
3215	Cc1cccc(Nc2ccc(Nc3c(Cl)c(Cl)c(C#N)c(Cl)c3C#N)c3nc[nH]c(=O)c23)c1	10	25.5984	350.889	7.05439	22	10	6	1	3	247.794	2066	10.1047	6.62222	6.01075	5.38682	3.69184	3.62101	3.86362	44.913	33.6122	34.5294	32.8468	29.36	29.4946	289.851	273.488	246.094	242.771	246.844	158.208	145.747	147.893	152.303	158.569	157.237	156.055	155.631	157.928	40.4171	15.3625	5.23695	25.2694	-7.8575	24.3218	-9.28376	-25.4117	11.5695	-1.08507
3248	CCOC(=O)C1C(c2cc3ccccc3nc2Cl)N(N=O)C(c2cc3ccccc3nc2Cl)C(C(=O)OCC)S1(=O)=O	10	32.6738	592.954	7.8202	20	14	4	7	2	415.616	2510	9.84325	5.91693	4.88237	6.29721	5.91302	3.86118	4.20268	38.0303	33.9571	28.1796	30.8087	25.757	25.5368	252.988	232.619	242.089	227.158	221.394	160.228	144.147	150.935	155.557	159.022	156.264	160.649	157.105	161.095	71.1095	62.894	-69.9978	47.493	105.673	77.1709	-89.3958	-235.766	18.4775	17.0487
1988	COc1ccc2nc(C)cc(-n3cc(CN(C)CCN(C)C)nn3)c2c1	14	20.1152	566.006	7.29412	15	7	6	1	0	140.667	1068	6.61538	2.29167	2.14286	2.70513	2.60351	2.18056	2.54861	20.5385	23.7037	17.6204	13.7786	11.7667	14.6667	202.525	198.339	164.365	162.51	132.595	166.728	151.091	164.234	157.847	164.971	167.066	163.694	170.816	161.804	98.5473	23.2633	13.5947	98.7751	-10.4364	-42.3269	-15.3136	-140.973	15.6272	3.24852
2308	COc1cccc2cc3c(=O)[nH]c(=S)[nH]c3nc12	13	14.1992	97.992	5.17267	14	6	3	2	0	132.875	972	10.3128	3.37143	0.575758	4.92129	3.12184	3.3754	2.65657	36	31.3103	27.5536	26.6	21.4286	17.7273	263.758	251.066	201.134	189.172	161.398	159.176	148.059	152.689	152.638	157.536	158.868	157.346	166.401	161.348	31.255	9.81741	-3.90139	-40.4877	-40.51	-16.46	10.3945	-15.3474	7.10562	2.27846
137	N#C/C(=C\c1cnc(N2CCOCC2)nc1)c1nc2ccccc2s1	30	19.6777	303.992	6.63329	15	7	5	1	0	154.587	1228	8.81111	5.25287	5.15278	3.86467	3.47671	3.06173	3.00733	30.7	30.2791	22.2955	20.2326	18.8966	20.7917	252.982	214.045	210.915	208.935	196.961	160.126	145.315	154.745	156.925	162.641	158.848	157.526	157.897	155.621	37.3131	-18.5811	-10.2078	-24.1961	10.8967	20.0539	11.845	2.90889	6.30187	-0.805
696	O=c1oc2ccccc2cc1-c1nnc(Sc2nc(Oc3cccc4cccnc34)nc(N3CCN(c4ccc(F)cc4)CC3)n2)o1	21	38.1195	713.738	8.11808	37	14	8	4	1	343.059	2196	10.9778	7.74436	7.9199	4.90084	3.23026	3.61705	3.79864	31.3714	31.3377	24.205	23.3636	27.7895	28.6822	261.098	227.127	206.763	211.98	230.995	161.142	146.467	154.056	157.175	161.008	161.198	160.972	164.207	159.896	88.4419	51.3235	14.5321	5.3678	101.945	49.1074	-103.21	-171.741	9.23	-1.20061
1879	Cc1ccc2nc(S)n(Cc3ccccc3)c(=O)c2c1	15	15.7228	161.532	5.77785	16	4	2	1	0	132.471	1008	7.62672	2.8312	1.85106	3.89622	3.21308	2.63746	2.1274	29.6471	27.4444	22.1867	19.8049	17.2308	12.0213	250.331	225.588	201.409	199.33	191.407	156.848	142.269	149.346	150.732	159.284	156.042	158.326	152.501	156.226	45.5828	11.2599	-8.11572	-8.08621	-30.6843	-97.8472	-33.3934	1.88675	8.11419	-1.30796
3008	CC(=O)Nc1ccc2nc(NC(=O)CSc3nnc(Cn4cnc5ccccc54)o3)sc2c1	10	26.3698	290.133	6.86426	23	12	7	3	0	248.868	1820	10.1378	5.79111	5.74129	4.97736	3.419	3.47737	3.41906	36.4	33.6111	26.2772	23.9231	28.36	27.1791	259.364	226.15	210.815	209.288	214.307	161.12	148.386	153.667	158.385	159.818	159.54	160.051	160.732	160.729	61.4526	-5.75342	-139.947	-37.8496	49.7436	38.7847	-5.70222	-36.1497	6.5496	-1.5288
4389	Cc1nn(-c2ccccc2)c2nc3c(nc12)Cc1ccccc1-3	0	18.9182	196.326	6.11269	21	4	4	0	0	109.472	894	8.48649	3.3	2.49153	2.95871	2.74557	2.3619	2.35593	24.1622	27.0976	21.759	19.5732	15	13.7966	255.547	228.175	217.839	217.508	189.204	157.916	144.138	148.941	157.158	158.788	158.44	155.869	156.221	152.859	58.7816	47.2257	6.96129	-46.9774	-69.0541	-89.7473	-47.9438	-48.5661	11.5376	5.40906
1478	CCN1CCN(c2nc(Nc3ccc(C#N)c(C(F)(F)F)c3)nc(Oc3ccnc4ccccc34)n2)CC1	16	29.9519	328.082	7.12826	22	12	8	1	3	397.562	1658	10.6885	8.04274	6.75	6.51742	3.59722	4.28775	3.49881	27.1803	28.1692	20.9789	20.0196	24.2906	22.5391	236.4	209.254	175.342	197.952	221.628	169.439	150.456	162.986	161.424	165.479	172.594	169.518	168.173	159.186	95.9398	140.166	72.1088	101.943	99.6606	-91.0465	-71.0559	-66.3198	9.38941	3.2365
2390	COc1ccc2[nH]cc(Cc3nn4c(Cc5ccc(OC)c(OC)c5)nnc4s3)c2c1	12.27	24.5465	372.623	7.05197	23	9	5	3	0	167.698	1506	8.81624	5.30065	5.20155	3.22496	2.68147	2.64322	2.78517	28.9615	29.4107	24.1748	19.4874	20.6863	21.6744	239.089	235.082	179.781	191.571	182.421	161.397	147.569	154.838	152.925	156.166	161.269	161.455	163.375	163.813	83.1598	-5.71992	-74.76	-92.121	-21.0309	29.6982	132.924	33.8067	17.5	4.625
2502	COc1ccc(/C=N/N=c2\scc(-c3cc(O)ccc3O)n2-c2ccc(Cl)cc2)cc1	12	24.1676	903.512	7.93769	23	8	3	3	1	207.481	1730	8.65407	5.40268	4.45263	4.23431	3.24178	3.40279	3.15876	35.3061	31.0192	25.36	23.6226	27.1915	21.2211	260.822	237.652	214.75	224.718	227.818	157.354	144.332	147.741	152.732	155.911	157.434	155.837	154.616	156.639	37.7108	-19.3083	-47.7343	-7.50753	35.4968	-23.9878	-9.45359	-45.8821	10.8534	-1.93794
331	O=C(Nc1nc(-c2ccc(Cl)cc2)cs1)c1c[nH]cc1-c1ccccc1	25	20.5631	206.796	6.28725	22	6	3	1	1	156.953	1490	8.25123	4.78435	4.77568	3.92383	3.07648	3.08718	3.11274	37.25	31.7209	23.2381	24.963	26.0161	22.9811	273.815	229.739	214.53	207.752	213.197	155.485	143.174	145.269	151.517	154.47	156.296	158.902	158.119	154.976	19.8263	-9.44963	-7.16864	-8.12333	-9.45432	-14.349	1.27432	-26.054	5.32	-3.48
1889	CN(C)c1ccc(Nc2c(Cl)c(Cl)c(C#N)c(Cl)c2C#N)c2nc[nH]c(=O)c12	15	21.4247	182.522	6.23649	16	10	6	1	3	225.988	1884	10.4311	6.15586	6.56093	5.79457	3.86893	3.38952	3.79309	48.3077	34.7317	38.4819	35.1875	30.4306	33.9677	285.985	288.942	232.296	210.614	236.186	160.866	147.974	154.508	151.609	158.841	157.805	165.505	159.801	160.177	51.7095	29.247	11.2919	21.9035	-43.658	-100.549	53.6605	59.3179	14.2952	2.89546
630	O=C(c1ccc(-n2c(-c3ccccc3)nc3ccccc3c2=O)cc1)N1NC(S)SC1c1ccc([N+](=O)[O-])cc1	22	31.9219	651.064	7.8649	28	11	5	4	0	359.336	2078	9.76644	4.40423	5.0458	5.89075	3.19725	2.96174	3.36113	34.0656	31.3333	24.8182	24.4276	20.0982	18.25	265.745	236.273	236.673	230.006	203.017	156.934	144.466	146.964	152.753	157.412	154.679	151	152.392	158.548	55.7694	42.4353	38.5369	-84.1576	-170.714	-128.906	16.7479	166.395	10.7528	-0.979844
1836	N=C1NC2NN(c3ccc([N+](=O)[O-])cc3)NC2C2CCCCC12	15	18.4703	228.122	6.26279	6	8	6	2	0	223.972	982	7.5814	3.5	3.01493	5.20866	2.2826	2.91447	2.99834	22.8372	25.3913	15.7656	13.8613	14.4605	14.0746	206.212	168.223	135.329	136.19	157.062	168.34	154.487	155.834	164.656	168.966	171.967	171.225	165.488	161.205	42.2353	37.9448	2.50297	-31.0238	-18.3775	34.1271	37.0297	-31.0946	7.15522	-4.66414
2314	N#CCN1CCN(Cc2ccccc2)CC1	13	12.0208	84.5508	4.90736	6	3	3	0	0	103.528	632	5.33333	1.53846	2.08824	3.13721	2.41204	1.89423	2.35294	19.1515	22.2353	12.8889	9.56522	9.07692	10	204.972	164.365	128.024	152.44	123.085	164.414	147.548	160.174	160.149	163.261	168.899	160.699	165.14	167.104	17.8108	-51.236	-28.4738	17.4454	-8.35354	-19.0331	9.98163	8.14417	2.93388	-6.39669
217	CC1CC(C)CN(c2nc(-c3ccc(NCC(=O)Nc4ccc(F)cc4)cc3)nc(N3CC(C)CC(C)C3)n2)C1	27	31.6477	2112.28	9.04182	18	9	7	1	1	293.583	1644	6.375	3.33702	2.2087	3.66979	2.65338	2.79067	2.28406	20.55	23.2381	15.2347	12.5861	17.4144	13.6435	205.863	171.432	173.892	163.317	200.439	166.188	148.555	157.612	160.388	170.703	160.728	171.11	156.055	161.175	117.44	93.6425	69.5425	66.49	-12.74	-166.097	-211.678	-232.025	13.64	-5.52
2982	N#CC(=C1CCCCC1)c1nc2cc(Cl)ccc2o1	10	14.8373	126.579	5.48272	9	4	2	1	1	118.228	1004	7.67515	2.48232	1.06818	3.69461	3.48803	3.00243	2.03283	31.375	27.7059	18.6076	18.726	19.0455	16.1364	248.87	192.748	198.036	215.006	204.8	158.81	142.241	148.658	156.821	160.172	163.283	157.457	154.823	156.806	50.8265	67.7984	79.1087	28.3392	-83.0142	-132.02	-103.758	-33.9956	5.5332	2.49609
2609	CSc1ccc(Cc2nnc3sc(-c4ccc(O)cc4)nn23)cc1	12	19.08	297.826	6.57198	20	7	4	1	0	139.535	1398	8.28655	5.20915	3.9	3.67196	3.03526	2.90523	2.61247	36.7895	33.3171	26.1579	20.55	26.2549	23.3	263.636	236.72	194.913	223.155	229.516	157.616	144.84	147.786	151.983	156.765	161.218	160.752	154.966	156.369	47.486	22.7387	-33.6374	9.73961	49.2742	-36.6799	-32.9311	-1.87473	8.65928	-1.60111
9	O=C1NC2CCCCC2N(Cn2nnc3ccccc32)C1=O	39	17.6538	134.878	5.69283	9	7	5	2	0	189.167	930	8.35897	4.43284	2.55	4.85043	3.73868	3.70398	3.05278	23.8462	26.2143	17.2936	15.0265	18.194	14.2167	218.732	175.33	157.169	173.352	189.156	165.965	150.818	157.301	163.548	168	169.061	167.593	163.373	159.9	58.3412	57.9204	49.0302	-41.6515	-29.6167	-31.4024	-87.7469	-101.201	7.31558	-1.15648
3058	COc1ccc(-[n+]2noc(O)c2CNc2nc3ccc(C#N)cc3s2)cc1	10	21.1608	209.318	6.3371	20	9	5	3	0	200.67	1355	10.1572	6.55224	6.1	4.89439	3.51761	3.30583	3.65787	33.0488	32.0455	25.6098	22.3523	22.6866	24.5333	256.61	233.672	195.587	193.845	200.738	160.757	148.265	152.549	155.886	161.138	160.671	162.25	161.666	158.95	43.0256	0.629123	-48.0813	-96.6777	3.89702	53.9338	64.5791	-37.525	9.84593	-1.3837
2562	Cc1ccc2nc(Sc3ncccc3C(=O)O)n(-c3ccccc3)c(=O)c2c1	12	22.0748	264.996	6.60933	22	7	3	3	0	244.42	1366	9.68475	6.39194	4.98	5.68419	4.2244	3.63919	4.32722	31.7674	30.5652	27.1413	28.5417	23	19.34	263.628	248.09	242.212	245.459	246.526	156.601	142.977	147.569	150.946	156.368	153.664	156.302	149.418	150.744	42.5024	24.5922	21.7515	22.97	-16.7796	-92.9037	-72.683	-51.7211	10.4803	3.50027
932	Fc1cc(F)c2nc(-c3ccc(-n4cncn4)cc3)n(Cc3ccccc3)c2c1	20	23.3107	390.775	7.03284	26	7	5	0	2	254.472	1214	10.7273	6.08081	5.55914	5.78346	3.38504	3.77329	4.03524	27.5909	28.8958	22.0722	20.9612	20.3434	18.8925	258.052	228.001	219.728	219.896	211.23	164.24	147.353	153.568	157.736	162.578	158.446	157.152	158.319	166.728	41.0992	-10.7025	-24.3223	28.9174	-12.2479	-32.1322	-3.81818	-69.1488	7.28306	-2.0031
547	O=C1C(Cl)C(c2cc3ccccc3nc2S)N1c1cccc(Cl)c1	23	19.2059	206.684	6.20666	16	6	2	1	2	138.176	1656	8.29218	3.8349	3.46098	3.83824	3.04993	2.68577	2.74623	46	33.0256	28.4756	27.8293	29.1493	27.3019	286.224	246.857	240.995	235.55	220.36	154.247	140.714	145.401	152.497	152.998	152.562	152.476	155.476	155.827	31.6863	-8.59122	-31.3094	-35.5536	-12.7805	-11.2369	-0.87822	-2.08291	6.58333	-3.25
3130	N#C/C(=N\Nc1ccccc1)c1nc2cc(Cl)ccc2o1	10	16.292	290.381	6.41313	15	6	4	1	1	138.228	1098	10.3868	6.71795	4.77143	4.60758	4.42248	4.57439	3.5776	36.6	31.75	25.4237	24.5094	27.3846	24.2857	277.538	226.198	241.672	260.63	236.884	158.825	146.249	148.76	158.788	164.912	160.779	153.855	162.536	159.509	24.0727	11.989	35.4307	24.2291	-5.72702	-31.1344	-81.3745	-71.0384	3.05556	-2.47222
1856	NC(=S)n1nc(Nc2ncc(-c3ccc(Cl)cc3)[nH]2)cc1-c1ccc(Cl)cc1	15	22.1961	278.586	6.65935	22	9	6	0	2	134.802	1826	8.37272	4.70525	4.63657	3.20957	2.82038	2.84799	2.90129	43.4762	32.6444	26.3295	24.4886	28.1806	29.2188	274.919	235.216	207.977	208.719	213.478	159.739	149.64	150.773	157.037	158.218	162.017	162.624	162.1	161.491	29.638	-3.30447	-34.1622	-9.5473	-18.4867	-18.8267	13.4156	-31.2447	5.53741	-5.56689
2153	COc1ccccc1N1CCN(Cn2nc(C34CC5CC(CC(C5)C3)C4)n(/N=C/c3ccc(O)cc3)c2=S)CC1	14	32.4819	2655.92	9.27084	17	9	6	2	0	210.243	1832	6.10826	2.6324	2.90759	2.69542	2.24828	2.01882	2.08827	23.4872	24.7619	16.7867	13.6562	16.1449	15.7079	215.38	182.355	168.067	179.065	169.27	162.861	147.191	154.968	157.427	165.083	165.984	160.999	163.035	156.697	93.959	10.6271	0.914749	-1.95084	-116.551	-89.8218	-70.0885	-7.26006	17	-5.22222
3478	CC1=NC(=C\c2ccccc2)/C(=N/Nc2ccc([N+](=O)[O-])cc2[N+](=O)[O-])O1	8.5	20.8913	201.874	6.30089	12	10	5	5	0	340.5	1190	12.45	7.42647	6.1	8.5125	7.21242	4.64379	3.92857	29.75	30.381	23.5316	22	22.7353	19.3571	247.56	221.473	208.203	220.272	212.862	163.572	151.319	152.335	159.526	164.463	166.379	163.627	160.238	159.287	51.375	47.625	-24.5625	-38.8125	-21.1875	8.25	-31.25	51.625	5.47625	-1.98375
1300	NS(=O)(=O)c1ccc(N2N=C(c3ccccc3)CC2c2cn(-c3ccccc3)nc2-c2ccc(Br)cc2)cc1	17.33	31.3542	494.299	7.56412	29	9	5	2	1	270.267	2958	8.08749	5.02483	4.31933	4.28995	2.59239	2.85081	2.81098	46.9524	33.6176	23.3691	21.5325	23.5714	21.8259	260.334	222.513	209.786	223.909	226.384	157.394	143.845	147.396	154.442	157.339	158.361	153.31	153.402	154.023	26.2308	33.5695	-53.05	-50.6092	-23.4637	16.1288	-28.3781	-76.4011	9.69136	-4.64198
2171	Nn1c(CS(=O)(=O)Nc2ccccc2)nnc1CS(=O)(=O)C1CNN=C1S(=O)(=O)c1ccccc1	14	27.6268	938.176	8.0967	17	16	7	6	0	437.232	2200	9.80952	4.67196	6.01724	7.80771	4.06672	3.92993	5.61811	39.2857	42.4915	28.7259	30.3214	25.0238	22.3103	240.919	206.064	194.229	189.329	182.789	164.388	148.848	153.357	161.05	164.191	165.688	164.408	166.58	166.946	-21.0884	56.3741	-109.297	16.0952	92.2313	-109.964	-90.1905	110.898	5.51881	-5.80676
3115	Fc1ccc(-c2nnc(C34CC5CC(CC(C5)C3)C4)o2)cc1	10	18.3921	282.94	6.43369	11	4	2	1	1	160.757	910	7.36585	3.64151	2.21875	3.9209	3.13139	2.81918	1.97656	22.1951	24.8222	14.5802	11.4437	17.1509	12.8438	221.804	173.829	156.301	180.212	209.562	163.591	144.148	148.746	156.063	169.127	167.332	167.33	152.915	153.586	58.2564	48.8632	32.1225	39.4557	-38.3837	-56.2362	-64.2064	-14.3855	5.45866	-8.24985
972	O=C1C=CC(=O)N1CC(=O)N1c2ccccc2Sc2ccc(C(F)(F)F)cc21	19	22.3805	237.958	6.50171	12	9	2	3	3	420.455	1484	13.7037	8.76515	6.93902	10.7809	4.18903	6.28371	5.68902	38.0513	34	29.3636	26.5652	26.5227	26.3171	273.14	252.044	237.09	232.476	224.739	165.129	145.326	155.541	154.881	159.417	159.642	156.313	160.183	168.908	33.6404	47.8973	-42.2092	-79.5368	25.112	-5.62517	75.6939	-105.983	3.38264	-1.28534
771	O=C(c1ccncc1)N(/N=C/c1c[nH]nc1-c1cccc(Cl)c1)C(=O)c1ccc(Cl)cc1	21	24.9437	258.289	6.71723	23	9	5	2	2	234.872	1794	9.77042	6.83058	5.59804	4.99727	4.01646	4.06126	3.3109	38.1702	31.5	25.8878	25.4167	24.5743	23.6176	273.711	236.969	235.046	240.978	229.552	158.584	145.953	149.409	154.499	160.445	161.137	156.427	156.178	153.206	31.6759	-5.78625	31.2254	-5.47477	-48.5673	-55.9951	-4.29305	-24.8019	5.93979	-5.84201
3090	CCSc1ccc(OCc2nnc3n2N=C(c2ccc(Cl)cc2)CS3)cc1	10	21.2013	559.658	7.32058	17	8	4	1	1	125.095	1762	7.60213	4.501	4.25235	2.84308	2.50445	2.76992	2.62531	40.0455	33.3617	26.7473	22.8605	25.9595	26.1695	260.509	224.759	193.087	195.205	204.19	158.316	144.508	149.946	155.859	156.558	157.283	160.049	162.933	157.42	63.3817	43.5515	-11.2468	-34.6046	36.584	36.4462	-44.2874	-65.3788	8.4375	1.125
1055	Cc1ccc(-c2c(C#N)c(N)nc3c2CCCCC3)s1	19	15.5729	122.863	5.50422	11	4	3	0	0	127.365	996	6.12012	0.77381	0.0655738	3.44228	2.81992	2.50705	2.15847	26.9189	26.6667	18.9674	18.5816	9.94048	5.22951	233.281	208.403	199.089	182.794	130.522	159.821	143.815	148.749	153.638	155.26	156.114	155.818	163.172	174.256	50.4729	56.8222	52.0162	-32.9074	-74.3082	-102.393	-93.1849	-15.7903	11.4091	7.30168
1440	Cc1cc(-c2nn3c(-c4ccoc4C)nnc3s2)c2ccccc2n1	16.82	20.4418	190.406	6.16545	23	7	5	1	0	126.67	1226	9.74854	5.47458	6	3.33342	2.67105	2.66792	3.12884	32.2632	31.7619	26.9868	25.519	19.322	21.2979	264.661	252.066	226.549	210.629	204.236	158.821	145.89	150.845	153.999	154.02	159.616	159.248	158.51	156.307	70.3035	36.2672	-37.6901	-12.0794	-33.8926	-41.1985	1.94121	-51.7002	12.9114	6.43144
614	O=C(O)CNC(=O)c1ccc(NC(=S)Nc2ccc(F)cc2)cc1	22	18.1842	173.525	6.03179	12	8	3	3	1	286.125	1266	10.0643	5.00585	4.57862	7.5296	3.50324	4.05756	3.71087	33.3158	29.2051	21.3	20.8831	21.8772	20.4717	246.431	201.707	198.136	197.208	198.212	163.645	149.725	152.359	160.779	163.083	159.762	158.638	159.049	160.721	16.7104	-27.8135	-81.2872	-48.7165	60.3872	26.394	-28.0234	-14.7245	1.20499	-8.49584
752	Cc1ccccc1OCc1ccccc1-c1nc(-c2ccc(O)c(C(N)=O)c2)cs1	21	23.5294	352.599	6.96394	23	6	2	3	0	224.698	1430	8.08889	4.3617	3.70261	4.49396	2.95897	2.8529	2.52052	28.6	28.2642	22.381	21.0086	22.6915	18.2353	250.373	230.767	192.106	204.823	225.355	156.552	142.722	145.842	149.448	154.804	156.993	154.552	150.526	150.544	44.3372	3.83822	-60.1787	-53.2562	29.9349	40.7908	-62.1723	6.83964	12.1552	-3.496
4296	Cn1ncc2c(NCCc3ccccc3)ncnc21	0	14.8373	373.522	6.56483	15	5	5	0	0	99.8611	764	7.41176	4	4.30952	2.93709	2.29074	2.48936	2.69444	22.4706	25.3889	17.5	14.8904	15.234	16.9286	223.884	190.911	149.07	147.747	177.482	164.855	150.563	159.173	160.188	164.167	163.903	169.532	164.608	157.283	45.7128	15.6782	-22.3979	-46.9827	-33.4706	-17.6159	7.92734	13.1453	7.47405	0.0449827
2475	Brc1ccc2c(c1)Sc1cccnc1N2CCCCN1c2ccc(Br)cc2Sc2cccnc21	12	27.4724	265.412	6.80506	24	8	4	0	2	133.886	4114	7.13006	2.39625	3.5022	2.47936	2.07926	1.93297	1.9202	76.1852	36.8136	31.2632	32.597	22.7397	22.9153	281.606	238.651	215.001	190.592	172.494	154.329	141.491	147.873	152.766	153.569	151.718	154.163	157.676	159.244	45.5342	19.1085	1.02092	-106.16	-136.621	-98.6546	42.256	148.068	10.6159	5.65158
346	O=C(CN1CCN(c2cc3c(cc2F)c(=O)c(C(=O)O)cn3C2CC2)CC1)N/N=C/c1ccccc1C(F)(F)F	25	31.7108	12960.8	10.856	16	13	5	4	4	570.118	1822	11.2308	4.62069	4.52113	8.77105	4.0601	4.36255	4.34937	28.0308	28.058	21.359	20.2443	17.8759	16.9859	230.806	210.375	172.188	173.035	175.917	170.132	150.106	161.048	161.649	162.431	169.955	169.874	167.205	164.956	77.929	83.8107	48.4615	42.0296	-80.9231	-159.746	-164.651	13.1716	9.16592	-3.81396
1746	O=[N+]([O-])c1ccc(-n2cc(-c3nnc(-c4ccccc4)o3)c(-c3ccccc3)n2)cc1	15.3	24.7249	351.232	6.99285	28	8	5	3	0	256.25	1280	10.8696	7.23864	5.81053	5.57065	3.50745	3.90783	3.35322	27.8261	29.52	22.2551	22.25	23.4432	19.7474	262.454	228.381	226.013	244.613	239.99	158.752	146.402	147.776	154.305	161.569	160.194	155.517	154.963	156.5	46.7429	41.4008	29.2231	-32.7316	-54.8922	-60.5747	-86.7429	-82.3667	7.13611	-1.73582
1199	O=c1oc2ccccc2cc1-c1nnc(Sc2nc(Oc3cccc4cccnc34)nc(N3CCN(c4ccccn4)CC3)n2)o1	18	37.303	697.128	8.07303	37	14	9	4	0	285.281	2128	10.5572	7.70455	7.86352	4.13451	3.1827	3.32122	3.51113	30.8406	31.1974	24.1083	23.675	27.0909	28.4252	259.705	225.812	211.653	214.952	226.982	160.302	146.783	154.709	156.853	161.79	161.637	159.71	162.783	157.807	88.864	61.0117	39.4201	-12.7038	34.8032	51.4512	1.43128	-94.5072	10.0321	1.47448
4249	O=C1/C(=N/Nc2ccc([N+](=O)[O-])cc2)CCCc2ccccc21	0	17.8441	238.478	6.30719	12	6	3	3	0	250.444	966	9.42105	4.37705	4.03571	6.59064	3.15191	3.50364	2.84028	25.4211	26.85	19.5326	16.8842	16.1967	15.6964	238.03	206.203	167.67	174.971	180.953	161.035	146.877	148.712	156.444	162.35	164.311	161.631	159.97	155.016	41.7175	34.1136	11.1607	-93.1579	-70.687	19.4321	18.1717	12.6676	5.22022	-4.8331
3731	Cc1cc2c(cc1C)Nc1c(c(=O)oc3ccc(Br)cc13)N2	7	17.8726	139.236	5.72463	16	5	2	2	1	143.662	2076	8.88763	3.26612	1.78639	4.10462	3.08939	2.8175	2.93597	59.3143	31.9474	28.45	22.6264	28.2037	23.6279	263.62	249.819	185.657	207.704	203.291	156.925	144.285	147.85	150.064	156.768	162.052	158.457	154.138	154.167	56.0328	47.4234	-2.43292	2.10886	12.4952	-45.0619	-50.6329	-106.089	10.92	-0.24
1948	Brc1ccc(-c2nn(-c3ccccc3)cc2-c2nnc(-c3ccccc3)o2)cc1	14.6	23.2417	301.898	6.7748	28	6	4	1	1	141.606	2328	9.06971	6.08466	4.69538	3.21832	3.1767	3.14789	2.83751	52.9091	31.9167	25.3298	24.1848	28.8452	26.3371	275.005	231.296	234.216	249.931	247.324	155.909	143.617	146.328	152.907	159.762	158.783	153.58	152.789	154.697	43.9087	30.2739	39.2556	22.3945	-19.1665	-70.3864	-95.8808	-98.8104	6.96488	-0.849174
13	O=C(CSc1nnc(-c2ccncc2)n1-c1ccccc1)N/N=C/c1ccc(F)cc1	38	24.0986	2525.09	8.96543	23	9	6	1	1	254.365	1504	9.75926	4.7457	4.39796	5.29926	3.67016	3.30107	3.28968	31.3333	30.5294	24.5204	22.9381	20.6082	17.6633	256.164	221.056	225.966	227.873	201.216	162.434	147.744	151.695	158.354	162.806	161.629	156.907	155.287	162.668	41.9722	-15.9198	-68.2531	-34.1265	-39.25	-11.9753	15.3364	45.0617	5.82422	-2.34028
1191	O=C1N(c2ccccc2)C(=O)C(c2ccccc2)(c2ccccc2)N1CNc1nccs1	18	25.2664	534.157	7.44384	23	7	4	2	0	230.149	1500	8.31624	3.86193	2.84713	4.42595	3.53246	3.02102	2.5703	28.8462	28.9464	21.9669	23.1045	19.0237	16.9172	254.085	226.543	226.567	210.525	198.913	157.527	144.161	149.733	153.433	155.919	155.289	156.67	155.568	156.419	40.5	34.1111	77.1944	-4.27778	-119.806	-141.167	-79.3056	-37.25	15.2899	9.82249
478	CC(=O)N1CCN(c2nc(Oc3cccc4cccnc34)nc(Sc3nnc(-c4cc5ccccc5oc4=O)o3)n2)CC1	23	34.6933	540.67	7.75142	31	14	8	5	0	312.281	2034	10.8376	8.72072	7.71989	4.80433	3.40303	3.85647	3.65193	31.2923	31.2817	24.5479	23.8477	30.8649	28.7647	255.247	226.509	200.223	222.213	250.09	161.073	147.155	155.837	157.142	161.162	163.973	161.662	160.511	157.869	101.818	74.0756	2.64	15.6622	104.551	41.7378	-76.0711	-139.929	11.2959	1.7929
2446	O=[N+]([O-])c1cccc(-c2nn3c(-c4cccc(-c5nnc6sc(-c7cccc([N+](=O)[O-])c7)nn56)n4)nnc3s2)c1	12	32.5601	548.073	7.6927	34	17	11	4	0	391.729	2146	14.0959	11.7063	11.4093	7.68096	4.42566	4.55879	4.92405	42.0784	38.2105	32.8952	30.3925	33.4524	34.1519	290.557	265.685	265.833	263.514	264.936	161.382	151.136	150.657	156.387	161.126	160.637	161.96	162.882	159.687	43.4195	24.4269	40.6248	-32.3436	-99.6231	-113.281	-17.169	2.63864	5.37486	-1.82814
4377	Cc1nn(-c2ccccc2)c2nc3c(nc12)/C(=N/N=c1/[nH]c(-c2ccccc2)cs1)c1ccccc1-3	0	29.4035	1618.83	8.67039	32	8	7	0	0	172.003	1626	8.9899	5.65789	5.09394	3.12734	3.01196	2.86035	2.72806	29.5636	30.1475	24.1167	23.6387	22.9737	21.1545	268.164	236.813	239.043	244.193	230.574	157.267	144.809	147.644	156.331	158.522	157.845	155.222	156.069	153.42	70.2043	60.7774	54.4832	-11.2865	-40.8564	-80.7131	-85.614	-73.6424	15.0245	7.04
2144	CO[C@@H]1[C@@H](OC(N)=O)[C@@H](O)[C@H](Oc2ccc3c(O)c(NC(=O)c4ccc(O)c(CC=C(C)C)c4)c(=O)oc3c2C)OC1(C)C	14	34.1393	1421.06	8.74076	16	13	2	11	0	469.535	1954	8.9	3.92793	4.29808	5.86918	4.11669	3.53973	3.24172	24.425	25.6265	22.0757	18.0128	15.6622	16.0769	213.937	211.036	170.202	167.68	166.283	163.126	147.432	154.056	154.449	161.054	161.731	162.443	162.915	160.433	129.058	98.8075	-9.7875	27.335	48.8	-55.115	-146.645	109.67	26.2969	1.23438
2568	Cc1c(C(N)=O)sc2nc(C)n(/N=c3\scc(-c4ccc(Cl)cc4)n3-c3ccccc3)c(=O)c12	12	27.0816	428.846	7.28487	26	10	5	2	1	241.984	2056	8.97104	4.9244	4.11966	4.65355	3.57635	3.19376	2.98215	39.5385	33.4821	30.4495	29.1695	26.595	21.1923	270.592	256.747	231.489	231.072	228.946	157.337	144.847	148.857	153.775	152.867	156.843	155.522	153.408	157.202	71.4737	49.826	-20.8279	-30.5938	-102.55	-15.6021	-73.6391	-30.2312	16.9941	7.01923
1489	Cc1ccccc1OCc1ccccc1-c1nn(CNc2cccc(C(F)(F)F)c2)c(=S)o1	16	25.928	408.212	7.20571	23	9	3	2	3	337.715	1658	10.3103	5.43082	5.63863	6.37198	3.08662	3.34585	3.52084	31.283	28.9643	22.9204	19.784	23	21.0935	246.73	219.026	189.811	205.836	213.817	165.359	147.224	157.306	155.166	163.359	165.324	161.799	158.338	160.433	64.5294	67.3245	-33.9828	-78.597	10.2157	-58.3801	-39.0419	53.7467	6.7565	-3.83161
4342	COc1cc2nccc3c4ccccc4n(c1=O)c23	0	15.3422	121.254	5.43974	16	4	2	2	0	135.694	776	10.2759	0.72973	0.130435	4.67912	3.45513	2.54505	1.76087	26.7586	28.6875	25.6825	23.5152	9.21622	5.43478	261.483	262.271	202.248	176	127.626	156.706	143.271	149.593	150.905	150.952	157.044	159.308	162.03	165.813	40.5957	24.3175	20.8549	-29.6873	-69.912	-104.812	-60.239	45.4637	11.8502	9.49108
904	Cc1nn(-c2ccccc2)c2c1/C(=N/c1nc3ccccc3[nH]1)CO2	20	20.3728	271.092	6.51875	20	6	5	1	0	128.972	1008	9.15	4.25333	3.87324	3.22431	2.79509	2.61111	2.48905	25.2	27.8636	21.6905	20.5679	16.4533	14.8592	248.651	218.029	205.876	203.514	188.216	160.613	147.448	152.837	159.603	160.951	162.655	156.901	159.589	160.526	59.36	42.27	-14.64	-65.11	-89.29	-17.37	-13.35	20.39	10.7475	5.33563
1268	C=C1C(=O)[C@@]23CCC(C4(C)CO4)[C@@](C)(CCC(=O)O)[C@@H]2CC[C@@H]1C3	18	19.4584	224.938	6.29129	0	4	0	4	0	227.604	1004	5.65385	2.61745	1.65686	4.377	2.21211	3.31991	4.12092	19.3077	21.8545	15.0667	11.9186	12.047	8.78431	196.274	187.922	131.558	111.718	123.103	162.604	143.194	149.882	152.355	157.949	161.259	167.979	166.28	173.954	66.4083	2.71598	-105.929	-105	-11.8166	79.4911	53.5089	-72.0414	20.6908	-3.61686
475	COC(=O)[C@H](Cc1c[nH]cn1)NC(=O)CNC(=O)[C@H](Cc1c[nH]c2ccccc12)NC(=O)CNC(=O)c1cc(-c2nc3cc(C)c(C)cc3[nH]2)ccc1O	23	42.2305	38430	12.243	29	16	9	7	0	513.778	2296	8.8172	5.07826	4.94915	5.52449	3.7757	3.98249	4.04178	24.6882	26.2347	19.5164	17.6444	18.6304	17.6568	225.919	202.645	173.234	176.635	184.863	163.756	149.717	154.96	158.231	161.483	164.361	164.848	162.596	163.324	101.543	3.44999	-182.775	-110.111	191.542	11.9453	-125.282	18.5954	18.841	-10.106
4234	COC1OC(=O)c2ccc(-c3ccccc3)c3c(O)c(O)cc1c23	1	19.0561	200.528	6.17642	16	5	0	5	0	222.278	1018	10.1053	3.59259	2.44615	5.84942	4.33849	4.02263	3.33846	26.7895	27.9024	24.7647	22.0918	15.6543	12	251.683	256.416	220.748	184.902	165.958	155.926	141.881	146.142	146.187	152.216	150.576	156.836	158.649	165.36	31.7424	26.3518	32.8587	-31.5208	-26.7701	-82.0665	-84.0083	-33.7922	13.5014	7.54848
2239	O=c1oc2ccccc2cc1-c1nnc(Sc2nc(Oc3cccc4cccnc34)nc(N3CCN(c4ccccc4)CC3)n2)o1	13	37.303	697.128	8.07303	37	13	8	4	0	281.281	2116	10.1778	7.49624	7.61757	4.0183	3.10498	3.26367	3.47737	30.2286	30.7143	23.5093	22.9758	26.8271	28	259.013	224.616	206.014	209.845	227.306	159.447	145.908	153.378	155.994	160.116	160.853	160.394	161.995	157.853	89.0133	61.28	49.6844	30.1556	84.3067	67.9156	-7.59111	-105.462	10.4286	1.02041
4482	O=c1n(CCCCCCn2nnn(-c3ccccc3)c2=O)nnn1-c1ccccc1	0	23.3107	237.257	6.56776	22	10	8	2	0	236.611	1262	8.65385	2.16129	2.5	4.55021	3.20486	2.69176	2.54348	24.2692	26.7273	17.4634	16.4667	13.9032	13.4565	221.798	174.025	167.985	169.732	161.076	166.633	152.865	158.63	164.67	169.203	171.491	168.536	166.214	164.374	93.7322	117.328	104.945	-72.0947	-185.318	-229.645	-173.993	-77.5444	9.2071	1.36095
2211	CC(=O)OC[C@@H](OC(C)=O)[C@@H](OC(C)=O)[C@H](/C=N/Nc1nc2nc3c(c(-c4ccc(Cl)cc4)c2c(=O)n1OC(C)=O)CCC/C3=C\c1ccc(Cl)cc1)OC(C)=O	13	44.1107	9049.14	10.8509	22	18	5	11	2	554.677	2968	9.82138	5.5368	4.99858	5.90082	3.86735	4.13299	4.0005	31.5745	28.6939	23.1095	23.6063	21.1911	21.0481	236.937	216.017	213.395	195.486	193.777	161.909	146.242	154.506	159.098	156.282	157.347	162.403	161.554	162.949	171.041	84.9437	-123.159	74.6754	98.1447	-155.892	-158.65	-188.989	19.636	13.6502
940	CN1C(=O)C2C(c3ccc(N(C)C)cc3)CNC2N(C)C1=O	20	17.2629	199.168	6.08261	6	6	4	2	0	188.944	922	6.77273	2.95588	2.25	4.29419	2.4115	2.69118	2.52469	20.9545	23.6304	18.1636	14.4412	14.2206	11.8056	201.503	197.212	140.889	121.004	162.65	166.199	150.323	162.74	155.562	164.624	161.876	170.604	162.339	163.174	68.8843	26.4132	-57.7727	-80.9132	-17.2025	5.71281	-8.6157	27.6074	16.8347	-0.987603
4026	O=C1CC(c2ccccc2Br)N(Cc2ccccc2)C2CCCCC2N1	5	20.5227	220.859	6.35304	12	4	2	1	1	151.328	2204	5.35426	1.94433	1.29422	2.96722	2.36687	2.24682	2.0868	43.2157	26.1296	18.6959	17.4458	16.9349	14.6014	225.508	183.749	175.002	176.093	164.477	159.998	143.828	150.752	158.173	160.27	158.585	156.944	157.836	160.242	34.7475	-17.1731	-18.5111	-7.00312	2.25518	-50.0721	-46.6155	-32.6505	7.49481	-2.4752
623	N#Cc1ccc(Nc2nc(Oc3ncnc4ccccc34)nc(N3CCOCC3)n2)cc1C(F)(F)F	22	28.5377	287.123	6.94085	22	13	8	2	3	398.562	1608	12.717	9.27451	7.83486	7.52005	4.22783	4.68954	3.80594	30.3396	30.5439	23.6496	23.5372	26.0686	24.1927	248.674	222.212	205.303	221.346	226.287	170.403	151.291	163.899	160.806	168.671	173.517	169.55	168.467	160.472	64.8138	88.7337	43.6625	22.948	-42.9733	-165.226	-51.3799	-49.701	4.53044	3.41865
985	Nc1ncc(C(=O)Nc2nc3ccccc3s2)c(N)n1	19	15.7632	121.983	5.49703	15	8	6	1	0	164.115	1056	10.0815	6.68519	5.28125	5.47048	4.07824	4.21416	3.6088	35.2	32.7812	27	26.4545	24.4722	22.8438	255.536	232.752	187.588	211.035	222.313	164.364	153.694	154.353	158.994	163.877	169.438	163.342	160.907	155.889	20.9077	11.2746	-28.5837	-23.2173	-13.3941	32.9012	-31.6178	-35.1442	6.08	-0.64
1135	O=C(/C=C/c1ccccc1Cl)C1C(=O)NC(=S)NC1=O	18	15.2344	154.124	5.73091	6	7	2	3	1	214.436	1312	10.3465	6.64506	5.43492	7.39433	4.0992	4.07865	4.66102	45.2414	33.2667	27.5156	30	28.8056	35.0286	276.621	231.166	202.074	226.794	235.072	157.48	145.534	147.479	155.159	158.57	158.513	156.37	154.147	160.421	11.727	-21.3736	-15.0845	58.6906	-20.6624	-12.7204	10.0589	-49.6226	1.67895	-5.75505
3801	CCCCCCCCCC(O)CCCCCC1CC(=O)NCCCN(C)CCCCN(C)CCCN1	7	25.8934	1788.03	8.76981	0	6	4	2	0	239.833	1466	2.81633	0.981424	1.10802	2.44728	1.82589	1.81502	1.94359	14.9592	17.9184	9.40876	8.87582	9.22601	9.65432	163.661	126.189	119.005	117.486	120.433	168.21	148.99	160.124	165.105	166.61	166.129	167.41	168.049	165.124	36.9592	-47.3665	-21.9496	24.5085	10.9633	6.15952	-24.97	-4.16743	5.26531	-12.6464
1134	CO/N=C(\C(=O)N[C@@H]1C(=O)N2C(C(=O)O)=C(CSc3nc(=O)c(O)nn3C)CS[C@H]12)c1csc(N)n1	18	28.0074	970.501	8.15875	11	18	8	7	0	416.371	2274	11.4691	6.92464	6.73884	7.71058	3.97731	4.21084	4.72621	42.1111	36.4912	32.9905	31.4711	28.5652	29.188	248.785	245.513	211.536	189.515	211.969	165.202	152.554	158.009	158.924	159.357	159.739	165.897	161.69	162.902	81.3704	72.284	-26.0741	-77.1358	-205.765	-48.8642	23.4198	78	16.037	2.76543
3995	Cc1ccc2[nH]c(-c3ccccc3)c(C3C=C(c4ccccc4)Oc4nc[nH]c(=O)c43)c2c1	5	26.7249	380.421	7.1352	27	5	3	2	0	200.083	1304	8.33333	4.97674	3.72024	3.70525	3.05377	3.06944	3.14583	24.1481	26.5763	20.6641	19.8633	18.6977	16.5952	253.221	233.373	232.574	232.213	211.137	156.262	142.773	145.882	149.455	154.096	151.4	151.087	153.544	156.83	54.69	30.2126	4.50069	12.3224	20.6845	13.8313	-66.4719	-189.831	13.689	5.1406
2407	CSc1ccc(Cc2nn(CN3CCOCC3)c(=S)n2/N=C/c2ccc3c(c2)OCO3)cc1	12	26.1106	397.912	7.18015	17	10	5	3	0	165.045	1802	7.70498	4.5977	3.91214	2.8456	2.60334	2.54097	2.37477	31.069	29.2581	21.8047	17.5571	24.0259	20.5736	234.091	205.656	174.961	211.505	215.604	161.49	147.565	157.75	157.501	161.109	166.101	160.177	156.136	157.823	78.114	-4.06328	-57.7192	16.7837	36.4281	-30.7241	-41.249	20.2144	11.3264	-2.239
2145	COc1ccc(C(=O)N(/N=C/c2c[nH]nc2-c2cccc(Cl)c2)C(=O)c2ccncc2)cc1	14	25.5414	283.206	6.8401	23	9	5	3	1	252.311	1608	9.71774	7.05556	5.8899	4.94727	3.95568	4.18152	3.60932	31.5294	29.3889	24.2816	23.4717	23.3302	21.3818	256.738	233.101	214.887	225.034	225.214	159.849	146.624	151.831	154.234	159.493	161.618	157.839	156.293	155.358	49.4316	-4.3736	2.21381	-21.4168	-4.28171	1.79449	0.497221	-44.8591	10.1661	-3.11765
222	CC1CC(C)CN(c2nc(-c3ccc(NCC(=O)Nc4ccc(Br)cc4)cc3)nc(N3CC(C)CC(C)C3)n2)C1	27	31.6477	2112.28	9.04182	18	9	7	1	1	230.717	2788	5.76334	3.03908	2.09147	2.88396	2.56489	2.46498	2.14837	34.85	25.0952	16.9437	13.4385	19.4254	14.6609	212.442	174.678	174.944	164.971	203.016	164.138	147.804	156.786	159.079	169.819	160.312	170.443	155.284	160.158	110.711	87.2818	77.5542	71.8099	-18.3033	-156.624	-226.72	-219.878	13.64	-5.52
1944	COc1ccc2[nH]c(C)c(Cc3nn4c(-c5ccoc5C)nnc4s3)c2c1	14.62	21.856	214.736	6.36266	22	8	5	2	0	141.198	1330	9.10101	4.75342	5.05238	3.20904	2.5191	2.63166	2.69603	30.2273	30.3125	24.9425	20.89	21.0822	18.5857	245.94	240.637	186.879	194.516	200.702	161.071	147.731	153.62	153.822	155.505	163.014	160.861	158.627	160.958	85.6905	28.1779	-83.7206	-30.5142	36.4392	-74.1563	-33.7082	38.3017	16.8264	5.84349
1298	O=C(NC(CS)C(=O)N(C(=O)NC1CCCCC1)C1CCCCC1)/C(=C\c1ccc(Cl)cc1)NC(=O)c1ccccc1	17.4	32.1241	613.886	7.85489	12	10	4	4	1	353.421	2188	6.25819	3.2145	2.71717	4.36322	3.40126	3.08304	2.7651	27.0123	24.9405	16.2318	16.7647	17.5058	16.6853	218.573	168.231	183.407	193.471	178.584	162.117	145.784	152.015	161.337	164.572	163.792	159.828	159.404	159.257	87.3023	92.9495	108.479	45.6791	-53.9444	-168.253	-67.1433	6.99067	10.0905	-4.67764
2355	COc1ccc(N2N=C3c4cc(Cl)cc([N+](=O)[O-])c4NCC3C2c2ccc(Cl)cc2)cc1	13	25.5294	383.175	7.11164	18	9	4	3	2	243.705	1812	9.2242	4.61929	4.29849	4.8741	2.96236	2.78311	2.75496	36.24	30.5556	24.0902	22.7015	21.4496	22.2627	258.615	232.295	208.126	201.977	207.091	159.648	146.384	150.072	154.86	158.992	157.941	157.767	156.953	157.084	50.7162	8.53199	-23.5375	-39.3805	-16.0167	-13.2388	1.30191	3.52006	11.16	1.88
962	N#Cc1ccc(-c2csc(-c3cc(-c4ccc(Cl)cc4)n(-c4ccc(F)cc4)n3)n2)cc1	19	25.4724	392.821	7.13651	28	7	4	0	2	228.259	1736	9.82716	5.99764	5.12306	4.96215	3.09524	3.28534	3.01901	37.7391	32.66	25.7778	24.8485	28.0532	23.8065	288.568	247.249	240.952	256.025	250.782	156.146	141.646	144.325	153.682	156.429	153.984	149.704	151.724	155.458	34.1487	-12.1126	-52.4951	-51.6019	-4.98868	1.18383	0.89428	-17.7147	5.93762	-6.65595
3969	CC(C)n1c(S)nnc1CSc1nnc(-c2ccccc2)n1-c1ccccc1	5	21.9654	247.415	6.54069	22	8	6	0	0	134.669	1546	7.32819	4.53286	3.47745	2.80561	2.43891	2.64669	2.5681	32.2083	29.6471	24.0777	23.2857	21.2043	18.3069	244.697	215.995	206.72	200.676	212.158	160.757	146.823	152.832	158.044	159.529	160.094	158.3	154.241	162.33	85.249	59.3007	-44.2925	-73.011	-30.135	91.2867	-22.4507	-79.6907	13.7552	5.97917
2748	O=c1[nH]c(=S)[nH]c2nc3ccccc3cc12	11	12.8254	80.3306	4.85615	14	5	3	1	0	115.847	870	10.1932	2.3	0.2	5.03683	3.52113	3.21574	2.13519	37.8261	32	25.7451	26.0889	20.5	15.8	279.104	241.157	211.662	208.401	169.776	157.203	147.232	148.47	153.603	159.432	157.131	156.857	162.738	164.224	14.1573	1.8034	-4.00042	-21.54	-13.0888	-24.2592	-17.7311	10.946	2.59924	-1.75425
3137	Cc1ccccc1NC(=O)c1cn(CCO)c2c(cc(O)c3ncccc32)c1=O	10	22.701	434.111	7.13801	20	7	3	4	0	280.528	1214	9.125	5.15455	3.81818	5.84433	4.0603	4.97121	3.87542	25.2917	26.6863	22.1182	20.95	18.6545	15.6667	239.656	227.422	202.674	186.605	180.273	159.967	145.875	150.612	154.224	157.791	155.359	159.996	161.029	164.025	48.6875	33	31.625	14.25	-13.25	-99.0625	-61.875	-97.3125	14.8242	6.32812
755	O=C(CSc1nnc(Cn2cnc3ccccc32)o1)Nc1ccccc1	21	20.5346	1089.13	7.94865	20	8	5	2	0	175.087	1292	9.32791	5.03636	5.80851	4.27041	3.4564	2.90769	3.4539	31.5122	30.8636	22.881	19.4643	24.8	24.5106	252.09	209.01	197.382	201.987	204.864	160.744	147.591	152.767	158.313	162.288	161.406	160.987	161.003	160.947	43.3324	-6.0499	-89.8633	-23.4297	42.5171	57.0354	-6.24912	-55.2078	4.21773	-3.35931
2943	O=C1Nc2cc3c(-c4ccccc4)c(-c4ccccc4)n(-c4ccc(Cl)cc4)c(=O)c3cc2C(c2ccccc2)N1	10	33.0769	580.758	7.77532	34	6	3	2	1	262.2	1848	8.24008	4.64017	3.99224	4.03384	3.4058	3.06571	2.94713	28.4308	27.7465	21.8634	21.5434	19.2134	17.4891	265.166	240.544	251.709	242.842	213.531	154.594	141.601	144.138	149.996	151.671	149.281	148.711	151.836	155.476	44.2969	15.633	42.528	48.9329	-26.3762	-147.413	-121.851	-22.2107	13.9276	5.71077
2739	O=C1N(c2ccccc2)C(=O)C(c2ccccc2)(c2ccccc2)N1CN1CCOCC1	11	25.2664	458.724	7.2916	18	6	3	3	0	233.951	1300	7.61404	3.07843	2.04878	4.10441	3.40636	2.97998	2.38618	22.807	25.377	19.3147	19.3975	15.3186	12	231.011	208.848	211.818	206.536	184.896	159.819	144.764	153.665	155.561	158.549	157.975	155.693	156.118	156.596	54.7418	24.4463	95.0883	91.5666	-81.8209	-273.047	-244.731	-53.9231	16.9172	11.6217
1598	CC(=O)Nc1cccc(OCc2cc(=O)oc3cc(C)ccc23)c1	16	18.7415	373.06	6.79721	16	5	1	4	0	210.222	1006	8.92683	4.02817	4.15942	5.12737	3.28932	3.25509	3.10306	24.5366	26.1163	19.8372	17.3118	16.493	15.4493	236.198	216.017	179.625	185.281	187.378	158.677	143.658	150.188	153.405	155.975	158.913	156.902	155.519	160.375	59.1404	8.05711	-68.0607	6.77216	-45.8471	-1.69244	-45.8453	1.74598	7.3718	-0.764426
1221	COc1ccc(N2N=C3C(SC(c4cc(Cc5ccc(OC)c(C6SC7C(=NN(c8ccc(OC)cc8)C7c7ccc(F)cc7)N6c6ccc(C)cc6)c5)ccc4OC)N3c3ccc(C)cc3)C2c2ccc(F)cc2)cc1	18	61.8542	1644.75	9.44657	48	14	6	4	2	480.312	3548	7.87135	4.96053	4.14485	3.61137	2.4975	2.73248	2.60889	26.6767	27.5972	23.2293	21.2865	20.9167	18.1195	242.822	233.129	214.552	215.474	223.101	159.206	143.435	150.106	152.306	154.682	153.646	155.266	152.038	154.247	169.586	-17.1667	-183.815	-70.5321	161.011	26.6235	-143.195	-96.5523	40.9895	12.3876
306	COc1ccc2oc(=O)cc(COc3cccc(NC(C)=O)c3)c2c1	25	19.3392	403.313	6.916	16	6	1	5	0	222.472	1070	9.57143	4.63158	4.45946	5.29696	3.36714	3.30702	3.3003	25.4762	26.8864	21.0353	18.7253	17.3158	16.5135	235.726	220.862	179.287	182.488	187.171	159.314	144.481	151.936	154.168	154.359	158.542	158.18	156.698	159.894	59.3039	-5.87075	-88.9909	-7.69841	3.3288	6.32426	-8.12018	-11.0431	8.28685	0.731293
1046	O=C(Nc1nc(-c2ccc(Cl)cc2)co1)C1=NNCC1c1ccccc1	19	20.5631	206.796	6.28725	17	7	4	2	1	172.033	1312	9.01475	5.319	5.31687	4.19593	3.46453	3.49675	3.44604	32	29.25	20.9341	21.3678	22.2742	20.9074	254.222	210.057	186.787	186.011	199.303	160.168	146.987	150.742	157.007	158.666	164.018	166.129	164.166	158.718	31.982	0.876697	-7.32477	34.4195	0.126541	-20.5316	-48.8169	-52.0113	4.87626	-4.21356
4118	CC(=O)N1CCN(c2ccc(OCC3COC(Cn4ccnc4)(c4ccc(Cl)cc4Cl)O3)cc2)CC1	4	28.5389	2240.11	8.99521	17	10	4	4	2	218.129	1994	7.5814	3.3491	3.81111	3.40826	2.28628	2.54253	2.69907	31.1562	27.7941	20.2229	20.5765	18.7973	18.425	230.134	196.75	166.294	166.884	172.537	162.46	146.897	157.69	159.792	157.395	161.557	162.029	162.065	160.893	73.5093	-39.4876	-144.875	-42.4387	89.3647	31.9237	-42.2853	-18.0734	10.8906	-6.37109
2689	Nc1nc(COC(=O)c2c(F)cccc2Cl)cs1	11	13.7513	106.769	5.25845	11	7	2	2	2	195.398	1256	11.2327	6.76984	4.15912	7.51529	3.77929	4.7123	3.65081	48.3077	36.7407	30.7872	35	33.9286	40.6667	273.252	236.846	216.641	210.03	241.645	163.327	147.47	151.743	159.435	164.708	163.129	163.794	159.209	162.308	19.8272	5.06173	-1.88889	-21.716	-30.2716	-25.2099	14.9259	-38.4815	3.36095	-1.53254
2894	Nc1c(-c2nncs2)n[nH]c1-c1ccc(Cl)cc1	10	14.1992	109.715	5.28567	16	7	5	0	1	96.1476	1194	9.30959	3.70115	3.88304	3.69799	2.66205	2.51753	2.75319	45.9231	36.1786	29.2917	27.6	31.3103	27.0526	277.872	245.952	196.09	184.818	209.834	161.76	151.664	149.699	155.137	162.28	165.546	165.174	162.231	160.249	18.7301	-1.92812	-14.3558	-28.1765	-5.02352	-27.305	20.5639	-11.9653	5.5858	-2.28994
2788	COc1cc(/C=C/C(O)=C/C(/C=C/c2ccc(O)c(OC)c2)=N/c2ccc(S(N)(=O)=O)cc2)ccc1O	11	28.2396	409.661	7.32366	18	10	2	7	0	377.383	1800	8.73721	4.9313	5.12821	5.9902	3.28643	3.26223	3.75173	28.5714	30.5231	22.0945	18.1357	18.458	20.3077	235.576	221.223	178.131	185.282	192.349	159.671	144.818	149.714	152.389	156.075	158.687	157.098	156.948	154.132	22.0908	12.283	-90.556	-97.9008	-52.7612	48.3829	83.1528	0.209737	11.482	-9.05367
971	COc1ccccc1Nc1nc2c(-c3ccc(F)cc3)nc3ccccc3c2o1	19	23.2013	387.184	7.02361	25	6	3	2	1	208.528	1200	10.1333	6.10227	5.98851	4.63395	3.27778	3.32134	3.36207	26.6667	28.3061	23.25	22.1959	20.3182	19.7701	257.289	235.598	222.505	216.128	221.5	159.625	144.397	149.588	155.472	157.42	158.376	157.451	156.674	154.596	53.679	30.8272	-1.48148	-38.5062	-18.2593	-53.4815	-64.0617	14.1852	11.1486	4.8079
468	CCOC(=O)C1=C(C)N=c2s/c(=C\c3ccc(-c4ccc(Br)cc4)o3)c(=O)n2C1c1ccc(SC)cc1	23	29.065	960.192	8.17547	22	9	2	4	1	253.835	3122	8.36594	3.87402	3.518	4.23059	3.61677	2.8795	2.57577	52.0333	33.2812	28.375	26.554	23.1701	24.5423	263.709	245.278	223.405	216.63	203.604	155.364	141.089	148.141	149.96	151.416	153.855	153.51	155.824	154.73	91.8794	80.3304	-10.3887	-11.8081	-4.4652	-68.3747	-66.3407	-8.46946	18.25	10.6875
2192	O=C1NC(c2ccc([N+](=O)[O-])cc2)NC2C1CNN2c1ccc([N+](=O)[O-])cc1[N+](=O)[O-]	13.5	24.4434	355.315	7.00441	12	14	7	7	0	486.333	1418	13.087	6.4381	7.30435	10.5725	5.67433	4.68307	5.8744	30.8261	31.0612	22.2966	20.9231	20.619	21.5652	236.608	206.405	183.974	184.71	181.769	167.524	156.078	156.165	162.297	167.973	165.989	165.18	167.125	167.395	33.4386	26.2798	-23.2136	-69.8507	22.155	76.5955	-48.2155	-23.2174	4.78875	-7.6758
682	Cc1occc1-c1nnc2sc(-c3ccnc(F)c3)nn12	21.29	16.9871	163.255	5.83725	19	8	5	1	1	168.115	1122	12.705	8.43333	8.34615	5.79705	3.63912	4.0179	4.51709	38.6897	35.6875	31.0755	29.2308	25.3667	25.5769	274.523	255.585	221.684	234.904	236.739	164.835	149.912	155.567	158.436	159.576	171.02	164.024	156.692	154.898	44.4884	10.0429	-48.5216	-1.09948	-22.8121	-61.3406	7.42463	-7.86775	6.91082	2.34602
484	O=C(CSc1nnc(Cn2cnc3ccccc32)o1)Nc1nc2ccc(Cl)cc2s1	23	24.1391	298.404	6.79706	23	11	6	2	1	184.651	1920	10.1975	5.70741	5.72525	4.29421	3.62297	3.31855	3.19371	44.6512	36.6809	29.5057	28.2674	31.6167	32.2727	280.026	237.852	219.241	226.553	228.691	158.935	146.689	151.649	156.233	159.948	161.196	159.312	159.604	158.146	40.5343	-13.0107	-91.9938	-40.7178	47.3145	22.1057	-29.7829	-20.2767	3.37966	-3.22823
4077	CC1=N/C(=N/N=C(\C)c2[nH]c(-c3ccccc3)nc2C)S/C1=N\Nc1ccccc1	4	23.5009	652.59	7.57956	17	8	7	0	0	155.92	1412	7.7342	4.03819	3.48667	3.05726	2.58369	2.71939	2.5834	27.6863	28.1852	22.1313	19.5437	20.75	15.67	240.59	210.417	196.476	206.701	203.22	161.936	148.261	153.153	159.93	164.52	163.842	158.48	155.196	163.489	78.7696	26.163	-56.4798	-57.4072	-41.4887	-18.8725	-43.9596	12.431	12.9066	-0.121107
126	O=C(O)CNC(=O)c1ccc(NC(=S)N/N=C/c2ccc(F)cc2)cc1	30	19.5984	293.489	6.63735	12	9	4	3	1	300.125	1352	10.1572	5.11111	5.1358	7.32012	3.77555	3.89851	3.75589	32.9756	29.2857	21.619	19.9506	22.4833	23.6111	245.422	201.655	192.625	193.992	197.205	164.426	150.725	153.533	160.667	164.699	162.716	162.8	161.484	161.491	18.4823	-35.8173	-78.6505	-46.9403	47.8192	22.2233	-18.0744	-12.3667	1.22249	-9.68471
1315	O=C1C=CC(=O)N1CC(=O)N1c2ccccc2Sc2ccccc21	17	19.137	185.207	6.09694	12	6	2	3	0	229.115	1206	10.1235	5.2807	4.3125	6.36429	3.45617	3.43632	3.98438	33.5	31.6923	26.7073	24.95	20.0263	22.875	270.247	240.879	230.462	211.301	205.564	155.208	142.089	147.52	153.277	151.998	152.651	153.769	155.272	155.061	29.1492	2.16804	-28.8073	-23.8285	16.1132	-32.9009	31.524	-41.8134	7.08333	0.444444
4451	O=C1CC(CBr)N1OS(=O)(=O)c1ccc(/C=C/c2ccccc2)cc1	0	19.3766	674.744	7.43062	12	7	1	4	1	241.878	2450	8.52467	3.36933	2.79365	5.89946	3.71158	3.15432	2.58122	59.7561	37.7209	26.8876	26.5	22.1831	20.4429	256.822	209.101	207.485	221.404	199.125	157.096	141.483	148.407	155.065	157.099	157.776	152.962	152.236	159.978	4.85122	41.4717	10.5076	-21.9444	3.35015	-102.431	-43.8163	24.4004	3.7323	-6.96669
348	COc1ccc(C2=NOC(C#N)CC2)cc1OC	24.5	13.3541	100.93	5.20222	6	5	2	3	0	139.389	772	8.875	3.02	2.73684	4.3559	2.59557	2.84778	3.22149	24.125	26.0606	20.4154	17.9385	13.46	13.1053	221.147	205.061	160.543	148.659	140.251	163	146.376	155.871	157.606	158.114	161.71	161.388	167.192	168.393	56.7539	1.78125	-35.1211	-95.8711	-47.6133	38.543	11.0078	-29.2891	9.01562	0.25
4088	Clc1cc(-c2[nH]ncc2-c2nc(-c3ccc(Br)cc3)c(-c3ccc(Br)cc3)[nH]2)c(Cl)s1	4	24.9032	287.169	6.79147	27	9	4	0	4	122.143	4284	8.50672	4.83543	4.07105	2.84053	2.6497	2.56777	2.45634	99.6279	42.1915	36.3846	34.9355	37.4021	33.7959	318.027	269.986	252.912	260.278	259.577	152.936	142.566	143.715	149.069	155.189	155.687	151.742	148.501	153.649	18.2647	2.15775	3.81893	13.8272	-41.6118	-46.4829	-30.9602	-41.9259	5.26717	-2.74635
2575	Clc1ccc2c(c1)Sc1cccnc1N2CCCCCCN1c2ccc(Cl)cc2Sc2cccnc21	12	28.8866	308.914	7.014	24	8	4	0	2	143.74	2318	6.56831	1.57805	1.66989	2.39566	2.02195	1.88612	1.81182	38.6333	31.5692	25.0464	24.1316	15.9939	15.2029	262.987	220.716	201.486	179.976	165.579	156.403	142.155	148.997	154.904	155.378	153.431	156.287	158.592	158.73	56.6067	39.3019	32.3403	-74.4086	-111.284	-122.518	-71.9056	-14.8664	11.8722	8.09778
197	CCCCCCCCCCCCCCCC(=O)N1C(=O)CSC1c1ccc(Cl)cc1	27.2	22.0867	101115	12.6226	6	5	1	2	1	208.87	1660	3.9419	1.1768	0.946728	3.07162	2.16069	2.00696	1.8669	24.4118	22.7826	13.5333	13.3898	11.5346	11.9452	199.205	147.139	142.827	137.838	133.523	162.564	143.651	152.565	161.598	161.975	161.439	162.322	163.068	163.118	59.3102	49.9712	59.2652	68.5336	26.5798	7.27088	-8.36332	-15.7697	8.57439	2.90657
4218	CCCCCCCCCCCCCCCCCc1nnc(-c2ccccc2)o1	1.7	20.4657	98409.8	12.5265	11	3	2	1	0	138.583	1102	3.58824	0.849315	0.84507	2.03799	1.68611	1.63128	1.625	16.2059	19.3188	9.47486	9.46512	8.69178	8.5493	184.328	128.211	126.624	127.162	124.579	164.331	145.119	153.728	163.474	165.085	165.279	164.165	163.746	163.917	71.3668	82.9619	75.8893	41.5571	11.9204	-15.6886	-16.6263	-11.0934	5.98875	0.725779
4397	CC/C(C)=N\Nc1nc2ccccc2[nH]c1=O	0	12.8658	139.854	5.47123	10	5	4	1	0	133.639	706	7.74194	1.80488	0.973684	4.31093	3.56812	3.47154	2.48246	22.7742	24.8438	19.1746	16.1833	14.2195	11	216.356	185.068	153.422	177.585	165.783	165.832	151.476	157.327	165.764	169.436	168.258	165.301	167.334	160.51	55.3267	50.7367	18.9719	4.02393	23.0031	-81.0832	-132.41	-68.3902	7.69823	0.748179
1926	Cc1ccc(C(=O)N(/N=C/c2c[nH]nc2-c2ccc(Cl)cc2)C(=O)c2ccncc2)cc1	15	24.9437	256.842	6.71161	23	8	5	2	1	240.061	1544	9.1921	6.5026	5.28601	4.80122	3.99665	4.10355	3.33813	30.88	28.8113	23.2596	21.4259	23.6262	21.0741	257.545	228.977	215.438	233.073	224.638	159.337	145.996	150.352	153.603	160.776	162.297	155.913	157.85	153.628	50.6098	10.8824	23.8452	23.7512	-13.5483	-47.1307	-41.8862	-59.0143	9.2528	-5.7216
3943	C[C@@H]1CC[C@H]2[C@@H](C)[C@@H](OCCCN3CCN(c4cc5c(cc4F)c(=O)c(C(=O)O)cn5C4CC4)CC3)O[C@@H]3O[C@@]4(C)CCC1[C@@]23OO4	5	38.3694	64404.2	12.6205	10	12	3	8	1	405.514	2046	7.41935	2.09701	1.80392	4.36036	2.5375	2.76835	2.18611	22	24.54	18.0214	15.2411	12.1455	10.9765	203.13	187.239	147.388	136.08	138.8	165.214	146.745	156.181	159.49	160.987	163.76	166.856	165.814	166.53	156.811	127.11	47.7334	-64.6275	-55.8741	-162.893	-117.626	-14.9344	27.6245	2.69962
2088	Clc1ccc(C(Cn2nnnc2Cc2ccccc2)OCc2nnc(Nc3ccccc3)o2)cc1	14	27.6057	429.481	7.31534	28	10	7	2	1	187.533	1682	8.72991	5.67841	5.49673	3.29005	3.09704	3.14712	2.9955	29.5088	28.6066	19.768	17.7143	21.1951	20.8824	244.065	199.852	188.271	199.899	199.592	162.382	148.843	153.251	159.265	162.312	165.692	164.982	164.063	164.204	60.7166	-11.8375	-53.9122	20.7889	51.129	-89.1924	-73.2042	11.32	4.90797	-8.4586
3704	CC1NC2C(c3ccc(Cl)cc3)NNC2C2NNNN12	8	16.2396	155.857	5.74209	6	8	7	0	1	95.7553	1082	6.20013	2.19618	1.93056	2.51988	1.94268	2.06758	2.09984	28.4737	26.878	17.3889	15.1121	16.25	14.7292	206.549	171.003	131.799	128.688	145.052	170.971	159.869	163.158	168.402	170.444	173.22	171.396	167.232	170.415	25.375	-19.9203	-47.8624	-21.405	-34.4711	12.8583	15.7418	-5.65583	7.98338	-3.31025
3111	Cc1ccc(OCc2ccccc2-c2nnc(-c3ccccc3)o2)cc1	10	20.4942	310.972	6.69521	23	4	2	2	0	138.194	1036	8.09091	5	3.76744	3.14078	2.95931	2.80794	2.63049	23.5455	26.0638	19.0543	17.2062	19.5143	15.8605	245.37	212.837	184.941	221.777	234.318	157.077	142.502	147.688	151.054	158.654	163.495	155.718	146.737	154.457	54.1157	23.5372	3.4876	8.61983	-12	-77.0496	-36.0579	-15.1074	8.22314	-2.43802
1461	COc1ccc(Cl)c(-c2nnc3sc(-c4cc(C)nc5ccccc45)nn23)c1	16.11	22.5631	251.53	6.55718	24	8	5	1	1	136.259	1588	9.42975	5.14043	5.20527	3.24426	2.8442	2.79285	2.91602	37.8095	32.913	29.7882	27.9888	23.1806	23.5424	272.362	263.784	235.787	223.008	212.448	158.14	145.22	150.636	152.248	153.984	156.924	158.476	162.75	158.224	66.392	24.0642	-14.034	-5.80896	-9.75818	13.461	-54.1748	-85.7241	13.3673	6.95918
1012	C=CCNC(=O)N1CCN(C(=O)c2cc(-c3ccc(Cl)cc3)n(-c3ccc(F)cc3)n2)CC1	19	25.6508	715.206	7.76649	17	9	5	2	2	296.533	1630	8.56437	4.65008	3.93626	5.29523	3.09101	3.50689	3.1362	29.1071	27.4915	20.2273	18.6204	19.4179	18.0388	235.887	199.849	192.991	195.189	190.142	164.196	148.519	156.864	161.671	163.644	162.119	159.722	160.787	159.188	66.643	28.6977	-29.2095	-95.6236	-33.4343	-1.68915	4.17687	-11.7564	10.3479	-2.60587
2850	Cn1cc(CCC(=O)NCc2cn(C)c3ccc(Cl)cc23)c2cc(Cl)ccc21	11	22.2246	192.18	6.28805	18	6	3	1	2	159.622	1602	6.8002	3.09136	3.18182	3.25759	2.49151	2.77206	3.12843	32.6939	27.5962	20.8319	17.254	17.4111	20.0909	243.355	218.625	168.333	151.474	172.16	159.76	145.204	153.301	152.457	157.654	158.866	165.419	161.982	161.472	59.885	-2.92694	-101.612	-114.928	15.3865	97.94	2.12471	-81.0205	12.1791	-1.25989
2399	COc1ccccc1C1CC(c2cc3ccccc3o2)=NN1C(=O)Cn1c2ccccc2c2nc3ccccc3nc21	12	34.2723	805.896	8.12704	32	8	5	3	0	247.889	1686	9.13433	5.66486	5.51366	3.69983	3.31533	3.15721	3.00395	25.1642	27.6622	21.9557	21.0667	19.3243	18.9454	254.364	228.923	209.499	210.93	207.068	157.411	143.606	149.402	155.438	155.818	157.987	157.526	157.299	155.731	86.2954	32.7652	-30.8017	-88.581	-3.04812	42.98	-45.575	-33.0815	18.1141	6.29472
1492	Cc1ccc(OCc2ccccc2-c2nnc(SCc3ccc(Cl)cc3Cl)o2)cc1	16	23.5414	354.969	6.97064	23	7	2	2	2	142.042	1906	7.82613	5.2383	4.21569	2.9592	2.99104	2.79659	2.56629	39.7083	31.7843	26.1111	25.0935	26.0921	21.0941	267.178	234.671	193.177	236.608	240.929	155.871	141.627	146.83	149.236	157.204	161.279	155.654	149.707	155.677	54.3182	2.12028	-45.6253	7.8744	29.6842	-41.8616	-25.0933	-9.45053	6.9375	-5.3125
1028	COC(=O)[C@H]1[C@@H](C(=O)OC)[C@@H]2C=CC=NN2[C@H]1C(=O)c1ccc(C)cc1	19	19.8726	255.511	6.49878	6	7	2	5	0	265.5	1122	8.95652	2.59016	2.07071	5.77174	4.14462	3.68625	2.9018	24.3913	25.8958	20.6389	20.0635	14.2869	11.9394	222.545	212.814	190.935	182.405	160.191	162.113	145.699	154.676	155.219	160.023	160.409	160.224	163.661	160.422	65.3195	3.20038	-54.1834	7.0397	138.641	-65.7864	-273.338	-65.034	15.4594	6.16257
308	COc1cc(/C=C/C(=O)c2ccccc2)ccc1OCc1nnc(-c2ccccc2)o1	25	24.0297	378.854	7.06855	23	6	2	4	0	212.222	1274	9.05882	5.24468	4.88372	4.16122	3.28041	3.1513	3.13114	24.9804	26.9074	20.466	18.6571	17.7979	18.0349	246.31	215.952	192.718	194.561	187.334	157.5	142.916	148.836	152.964	156.28	158.273	157.218	159.176	157.083	57.0484	2.46713	-17.7682	-60.1869	-45.4083	5.37716	43.9689	-22.0623	8.79469	-3.44098
573	Cc1c(NC(=S)Nc2ccc(C(=O)NCC(=O)O)cc2)c(=O)n(-c2ccccc2)n1C	22	23.8172	2480.23	8.94751	17	10	5	4	0	303.68	1534	8.89316	3.71914	3.85663	5.84001	3.08704	3.10943	3.20978	29.5	27.7778	22.2342	20.5082	17.5556	19.6237	235.106	212.515	186.445	183.279	173.13	162.525	150.269	155.692	159.438	160.395	161.659	158.802	161.028	162.336	62.8889	23.0556	-73.0278	-113.889	-29.0833	-3.38889	9.5	-17.25	12.1176	-1.57544
3473	CCCCC/C=C\CCC(O)CCCCCCCC(=O)O[C@H]1CC[C@@]2(C)C(=CC[C@@H]3[C@@H]2CC[C@@]2(C)[C@H]3CC[C@@H]2[C@H](C)CCCC(C)C)C1	8.8	36.5595	1.72659e+07	18.2329	0	3	0	3	0	288.153	1890	2.87302	0.944724	0.870647	2.28693	1.64097	1.74846	1.74575	15	18.2481	10.8535	9.44397	9.03266	8.58706	175.651	149.88	120.196	116.942	127.577	164.172	143.785	152.245	158.042	160.283	163.15	165.055	161.891	163.928	84.1497	14.4399	-54.4036	-40.5193	18.7868	17.6145	-33.4785	-34.898	25.9796	-0.0816327
4133	Cc1nn2c(-c3nc4ccc(Cl)cc4[nH]3)c(-c3ccc(Cl)cc3)nc2s1	4	21.2987	238.381	6.42938	23	8	5	0	2	112.07	1738	9.2339	4.81887	2.84165	3.02891	2.92912	2.76213	2.33315	46.973	35.7561	29.7922	28.473	28.7808	30.7826	291.527	257.515	258.792	267.322	247.609	157.196	145.539	149.148	154.927	159.939	157.359	153.499	157.001	150.902	43.9744	28.3812	21.0582	-10.4508	-43.9894	-72.7211	-115.948	-68.6714	7.56684	3.38641
777	O=[N+]([O-])c1ccc(/C(Cn2cncn2)=N\Nc2nc(-c3ccc([N+](=O)[O-])cc3)cs2)cc1	20.78	25.0245	278.047	6.79094	22	13	8	4	0	357.92	1602	12.1401	7.21839	6.87398	7.78087	3.34597	4.17483	4.0134	34.8261	33.4082	24.4783	22.58	27.1149	27.0122	258.497	228.01	199.976	222.674	218.527	163.848	152.34	154.393	157.604	162.418	164.496	161.835	163.473	162.84	35.4188	-10.0458	-63.9807	-82.0023	3.37534	20.6883	8.15543	-24.3317	3.569	-9.75803
1044	Cc1ccc(N2C(=O)CSC2c2cc3ccccc3nc2S)cc1	19	19.1774	175.94	6.04561	16	5	2	1	0	143.447	1374	7.34383	3.36364	2.6651	3.58618	2.78661	2.60903	2.66351	34.35	30.2326	24.9889	24.551	19.8961	15.0986	261.018	237.519	215.172	208.957	200.905	154.759	140.503	145.915	150.218	153.429	151.734	153.545	153.066	155.151	50.9936	5.92494	-60.563	-17.1546	-2.25877	-19.6104	-12.5615	-28.8005	9.9375	-0.25
4493	CCCn1c(C)cnc1C1CN(C(=O)c2ccc([N+](=O)[O-])o2)C1	0	17.8726	181.76	6.0356	10	8	4	4	0	256.694	1010	9.31707	3.36047	4.21053	6.26084	3.39109	2.56718	3.94493	24.6341	26.4651	19.0225	16.9896	12.4767	16.8246	213.441	182.656	168.304	133.873	125.619	166.273	150.692	159.934	163.266	165.396	159.193	166.171	171.977	169.427	83.5312	85.3724	13.652	-105.159	-39.6514	181.913	159.77	-79.7501	11.6722	0.647234
118	Cc1ccc(-c2nn(Cc3nnc(S)n3-c3ccccc3)c(=O)n2N)cc1	30	21.3677	221.159	6.39213	22	9	7	1	0	184.249	1328	8.93883	4.71138	4.45053	4.18748	3.41284	3.34272	3.47274	30.1818	29.0426	23.8495	20.466	21.2683	20.2055	242.457	221.52	201.942	187.186	186.443	163.576	151.534	156.394	158.711	164.066	163.642	164.584	167.095	165.561	71.8188	39.7472	-32.8899	-57.0698	40.6814	37.517	-51.3677	-112.465	12.6875	-0.75
691	COc1ccc(C2=NN(C(=O)COc3ccc(Cl)cc3Cl)C(O)(c3cc(F)c(Cl)cc3Cl)C2)cc1	21	27.3599	801.38	7.9391	18	11	2	4	5	287.361	2472	9.93115	6.65051	5.5977	5.52618	3.93099	4.2203	3.7303	47.5385	33.7636	31.681	31.4344	30.1091	29.3103	273.807	247.561	201.009	210.172	239.472	160.137	144.617	150.783	157.046	156.928	161.273	162.579	156.493	157.523	51.3881	-15.2431	-85.6403	-19.3807	82.3767	7.81898	-45.0319	-47.325	10.6342	-5.69712
3211	Cc1ccccc1OCc1ccccc1-c1nn(CNc2ccc(Cl)cc2C(=O)C(F)(F)F)c(=S)o1	10	28.1872	405.331	7.28564	23	11	3	3	4	389.082	2046	11.0191	6.00492	6.23009	7.07421	3.72675	3.73211	3.79059	37.2	31.069	26.2051	22.9291	25.4513	24.469	257.991	230.78	199.536	210.347	220.96	164.719	146.855	156.757	155.417	158.896	164.941	165.019	160.07	160.025	66.2329	74.0383	32.3134	-30.7052	7.13576	-76.3474	-54.9417	74.1454	7.07669	-3.40033
2227	COc1ccc(-[n+]2noc(O)c2CNc2ccc(Br)cc2)cc1	13	17.7751	237.707	6.30395	17	7	3	3	1	149.578	2155	8.60703	5.23868	4.21561	3.93627	3.16969	3.48084	3.33967	56.7105	31.8	25.987	20.2927	23.0635	24.9286	245.396	215.277	173.217	181.529	192.81	161.371	148.968	153.659	157.89	162.115	161.649	162.207	163.688	159.848	40.3911	3.21653	-40.6296	-52.3147	32.311	33.744	-25.0627	-67.0829	8.06233	-3.21607
3548	COC(=O)C1=C(C)NC(C)=C(C(=O)OC)C1c1c[nH]nc1-c1ccc(Cl)cc1Cl	8	22.1722	237.33	6.53416	11	9	3	4	2	230.955	1720	8.90021	2.61288	2.38476	4.81156	4.00954	2.99709	3.29592	35.8333	29.46	27.5258	26.871	17.535	21.1074	243.008	257.939	214.37	187.177	161.458	161.691	147.173	154.436	150.363	155.878	156.552	161.058	165.491	164.33	80.962	45.1541	-31.9115	-59.3939	-70.9672	55.1689	-167.953	-177.603	19.2578	11.5156
307	CC(=O)OC[C@H]1O[C@@H](Oc2nc(-c3cccs3)cc(-c3ccc(Cl)cc3)c2C#N)[C@H](OC(C)=O)[C@@H]1OC(C)=O	25	30.1811	449.492	7.46909	17	12	2	8	1	365.87	2150	10.1621	6.27969	5.36437	5.90113	3.9715	4.26232	4.03974	34.6774	30.9231	24.3134	25.237	25.2184	23.5754	249.49	217.621	215.6	210.23	216.693	159.002	143.106	151.875	157.468	153.577	156.861	158.636	156.759	156.879	89.6225	14.357	-111.819	44.0459	73.0981	-95.1009	-56.0583	-103.897	11.532	5.44745
1042	N#Cc1ccc(Nc2nc(Oc3ccnc4ccccc34)nc(N3CCC(Cc4ccccc4)CC3)n2)cc1C(F)(F)F	19	34.1945	620.835	7.88968	28	11	7	1	3	417.118	1828	10.087	6.33333	6.30519	6.04519	3.29052	3.56394	3.24576	26.4928	27.6622	19.6272	18.5824	20.0063	20.8312	243.644	206.574	187.872	196.371	195.9	165.798	147.151	156.385	157.635	164.636	167.687	164.447	166.748	159.502	85.1447	131.789	102.184	103.914	18.619	-99.9979	15.6629	17.9674	6.45726	-2.22495
1894	O=C(CCNC12CC3CC(CC(C3)C1)C2)c1cccc([N+](=O)[O-])c1	15	19.3392	1114.29	7.89144	6	5	2	3	0	244.257	998	6.5	2.69767	3.14667	5.08869	3.0625	2.82461	3.13333	20.7917	23.2745	13.3289	10.0843	13.1163	15.1067	206.846	163.725	134.336	130.892	151.708	163.041	145.536	149.853	158.181	165.895	164.557	166.003	163.802	159.389	44.6667	15.3333	0.555556	58.7778	66.7778	88	-29.1111	-39	5.04688	-9.95312
1208	COc1ccc(/C=N/NC(=O)c2cc(Cl)c(Cl)[nH]2)cc1OC	18	16.4703	165.64	5.89827	11	8	3	3	2	159.066	1434	9.29171	4.18239	5.88056	4.54475	2.88818	2.92284	3.66553	40.9714	31.5833	32.7742	22.0769	18.0943	24.575	249.154	237.096	172.776	170.487	165.162	163.013	149.972	157.285	156.517	161.175	165.919	161.877	166.163	163.169	42.1482	-14.3518	-25.6807	-49.2203	-62.3642	53.3688	44.1436	-5.14724	8.61306	-2.25551
3101	CO[C@@H]1C=C[C@@H](N(O)c2ccc(Br)cn2)CC1	10	12.8658	86.5527	4.99138	6	5	2	2	1	114.995	1898	6.72085	2.13992	1.79051	3.59359	2.37246	2.282	2.50969	59.3125	29.7576	22.4	16.1842	21.3556	26.25	224.102	180.108	143.319	146.342	153.219	163.383	148.155	156.216	161.013	164.669	165.327	163.745	164.499	162.233	29.6996	-9.61949	-20.3062	-46.7482	-3.13705	14.826	-0.97503	-18.7491	5.41504	-4.68652
3699	Nc1nnc(Sc2nc3ccc(Cl)cc3c(=O)n2Cc2ccccc2)s1	8	20.6725	254.839	6.49614	21	9	5	1	1	167.123	1734	9.22352	5.83506	4.45696	4.39798	3.46374	3.4231	3.22825	45.6316	36.5122	29.557	29.0494	31.0267	25.6901	281.665	247.022	257.835	260.042	248.386	157.868	146.052	148.855	151.931	159.036	153.746	152.364	154.053	154.973	25.7392	-5.41671	6.95298	-15.449	23.2709	-26.0627	-48.34	-47.4328	5.60111	-0.484765
2684	CS(=O)(=O)c1ccc(OCc2nnc3sc(-c4ccccc4)nn23)cc1	11	20.7999	412.389	6.97748	20	9	4	3	0	214.692	1526	9.77222	5.58642	4.50303	5.36729	3.58913	3.39615	3.19613	38.15	37.9535	26.4819	22.975	25.8333	23.4	261.274	225.184	190.431	209.013	228.351	159.008	144.537	150.278	156.317	157.385	159.866	162.935	160.526	159.017	31.4444	28.5556	-61.2222	-12.5556	38.1111	11.4444	-95.7778	-57.2222	5.52	-3.16
555	C=CCCCCCCCCC(=O)N1C(=O)CSC1c1ccc(Cl)cc1	22.3	18.5512	3997.18	9.20964	6	5	1	2	1	192.37	1468	5.02058	1.58436	1.28655	3.77196	2.55728	2.37135	2.20598	28.7843	25.3846	16.5197	16.1429	13.8704	14.8211	216.772	165.63	158.371	151.635	146.689	160.811	143.086	151.046	159.663	160.547	159.74	160.958	161.918	161.837	47.0686	32.2965	27.225	41.1544	-1.7157	-19.37	-30.4855	-33.95	7.39792	2.16955
2140	O=C(O)c1cn(Cc2ccc(Cl)cc2Cl)c2c(C(F)(F)F)cccc2c1=O	14	21.1851	251.097	6.51909	16	9	1	3	5	400.434	1720	13.4381	8.65895	8.43175	10.8225	6.5533	5.10164	9.7246	46.4865	34.5128	30.5301	30.6064	32.9167	40.2571	280.154	261.477	231.89	210.862	248.62	166.109	145.569	155.225	152.114	163.949	160.486	169.895	156.784	173.372	23.8071	51.9734	20.5628	23.891	-50.4049	-90.1947	38.7284	-42.401	3.10665	-0.398101
1657	Cc1nn(-c2ccccc2)c2c1C(c1cccc(Oc3nc(Cl)c(Cl)cc3Cl)c1)C(C#N)=C(N)O2	16	27.7197	838.78	7.98471	23	10	5	2	3	205.294	2156	9.62382	4.59841	4.40108	4.02537	3.42082	3.13278	2.75402	42.2745	32.7818	31.5221	28.3554	20.5214	20.0569	279.344	256.319	244.053	228.486	196.354	158.042	145.279	148.322	153.629	156.355	154.862	154.274	159.694	159.468	63.8829	43.575	-17.4761	-42.8519	-118.483	-133.569	26.0521	71.9301	12.8631	3.26836
89	Cc1ccc(NC(=O)CSc2nnc(-c3cc(F)c(Cl)cc3Cl)n2N)cc1	31	20.9602	750.29	7.61371	17	10	5	1	3	230.542	1850	9.50376	4.11676	5.33882	5.62297	4.29364	3.13605	3.47767	45.122	34.3023	32.6988	27.4091	28.2203	28	264.626	240.199	206.535	203.93	207.885	164.225	150.198	153.058	157.487	164.545	166.683	166.182	162.169	160.466	50.2392	15.1185	-78.9172	9.15379	20.2353	55.0447	-38.6817	-3.33858	7.77751	-5.43189
675	Oc1on[n+](-c2ccc(Cc3ccc(-[n+]4noc(O)c4CN4CCN(c5ccccc5)CC4)cc3)cc2)c1CN1CCN(c2ccccc2)CC1	22	40.9075	853.123	8.37814	34	12	8	4	0	302.583	2094	7.2043	3.21186	3.76355	3.25358	2.65267	2.51412	2.29009	22.5161	25.54	17.3333	14.6103	13.7881	14.9754	221.879	192.826	166.342	162.349	156.737	162.831	148.565	156.028	159.163	160.753	161.554	163.719	164.483	159.794	101.844	-0.783906	-53.8536	2.82229	2.26477	-222.476	-58.3681	117.1	17.6668	-11.4318
2783	COc1ccccc1N1CCN(C(=O)/C=C/c2cc(OC)c3c(c2)OCO3)CC1	11	22.5346	462.394	7.20113	12	7	2	5	0	200.694	1234	8.22642	3.65254	4.10638	3.78669	2.4419	2.54096	3.08097	23.283	25.7143	19.3534	17	12.7797	15.9894	219.471	205.891	158.227	148.084	139.729	161.835	146.294	158.224	156.232	155.567	161.292	161.753	164.978	163.16	74.4948	-2.71093	-49.5518	-110.381	-124.119	20.9035	212.3	59.1905	14.4215	1.75436
4171	CCN(CC)c1ccc(-c2nn3cc(-c4ccc(OC)cc4)nc3s2)cc1[N+](=O)[O-]	3	23.3107	333.82	6.90921	20	9	5	3	0	246.17	1470	8.79303	5.38211	6.17222	4.82686	3.3782	3.70039	3.75664	28.8235	28.9815	23	21.1724	20.9146	27.0667	235.473	222.531	176.207	160.274	185.976	162.075	147.983	155.549	157.105	154.952	161.395	167.089	163.741	156.097	91.8661	68.0669	3.39045	-7.46012	52.0457	-24.273	-45.6315	-25.3299	17.083	9.22491
2280	CCOC(=O)C1C(c2ccccc2)N(N=O)C(c2ccccc2)C(C(=O)OCC)S1(=O)=O	13	24.1315	369.614	7.07561	12	10	2	7	0	377.327	1618	8.97222	3.37234	1.9422	6.73799	5.87136	3.98483	3.39836	28.8929	30.8448	23.9291	26.9804	16.5106	12.9595	226.099	205.184	217.59	193.266	174.19	161.705	144.532	151.913	157.397	159.297	157.031	160.581	160.613	161.89	51.0972	52.7917	-41.2708	131.924	104.507	-52.6389	-323.639	-292.299	16.1122	16.1531
1057	CN1CCN(Cc2c(O)on[n+]2-c2ccc(Cc3ccc(-[n+]4noc(O)c4CN4CCN(C)CC4)cc3)cc2)CC1	19	32.7218	437.133	7.49122	22	12	8	4	0	261.028	1730	6.96203	3.16667	2.92216	3.30415	3.04589	2.64699	2.39321	21.8987	24.9762	16.8367	12.9918	14.2396	14.7545	206.016	185.681	156.773	179.775	157.155	166.274	151.458	161.37	159.793	164.624	166.376	162.629	165.159	160.576	107.677	19.0277	13.1626	144.642	44.0769	-246.751	-103.956	-47.2796	17.7167	-8.82775
2511	N#Cc1c(F)c(Cl)c(Nc2ccc(Nc3ccc(Cl)cc3)c3c(=O)[nH]cnc23)c(C#N)c1F	12	25.5984	364.253	7.09177	22	11	6	1	4	366.983	1900	13.0514	8.48936	8.61043	8.53448	4.85242	4.798	5.04204	44.186	34.7609	33	31.0909	28.4787	31.3704	294.57	268.57	250.688	248.97	239.794	163.604	147.865	149.453	157.396	163.639	159.559	157.523	161.62	164.255	20.0909	5.97182	31.5067	78.8121	-40.0472	26.8004	13.2784	-23.1728	7.44456	-4.30719
898	O=C(Nc1nnc(S(=O)(=O)Cc2ccccc2)s1)c1ccnc2ccccc12	20	22.1646	226.767	6.45354	21	9	4	3	0	260.47	1598	9.87831	6.88525	6.71333	6.20166	3.83269	4.91262	3.96025	38.0476	37.4667	27.6739	26.6444	30.0164	29.06	268.999	230.127	211.946	217.387	227.831	157.474	143.09	146.644	153.774	156.126	159.723	160.124	160.13	157.605	8.04535	10.7508	-28.5369	43.2918	15.8032	-37.0967	-0.996725	-35.1612	3.91837	-3.63719
1420	O=C(/C=C/c1ccccc1)C1C(=O)NC(=S)NC1=O	17	14.4584	181.918	5.84541	6	6	2	3	0	214.847	1024	10.0843	5.91667	4.87619	7.40852	4.0614	4.21296	4.50829	35.3103	30.0667	22.7656	25.7895	23.0278	21.3143	260.315	213.418	190.176	211.123	213.167	158.057	145.771	147.775	155.626	159.271	159.052	156.783	154.78	161.436	12.8689	-19.8273	-7.21932	66.9088	-22.7905	-16.4133	-0.484476	-53.6293	1.66231	-4.79548
1479	CCN1CCN(CC2SC(c3ccc(Br)cc3)N(c3ccc(Nc4nc(Oc5cc(=O)n(C)c6ccccc56)nc(N(C)C)n4)cc3)C2=O)CC1	16	40.557	1665.06	9.04686	28	14	9	3	1	323.443	3486	7.46716	4.50377	3.91198	3.55432	3.06731	2.80853	2.65063	38.3077	28.5876	22.5616	19.127	20.9159	21.1004	231.348	210.07	182.14	191.575	197.737	162.555	147.801	158.469	156.735	160.484	160.274	161.87	159.942	157.868	139.509	84.8221	13.7626	109.032	91.5138	-99.8358	-49.8464	-64.6407	23.1834	2.01775
3485	COc1ccc(Cc2nnc(S)n2N)cc1OC	8.24	13.5325	92.4856	5.11484	11	7	4	2	0	114.194	990	8.4159	3.66461	2.76543	3.56855	2.68246	2.55883	3.03767	30.9375	28.4242	25.7018	17.1159	15.963	19.8333	221.771	224.318	157.609	157.346	133.488	165.837	152.788	160.577	156.581	160.269	164.471	164.237	169.049	172.403	59.5635	-0.696566	-64.6742	-88.9497	-37.3247	36.7351	104.597	-31.8588	11.2656	-0.546875
1053	Cc1cc(=O)oc2cc(Oc3nc(Nc4ccc(N5C(=O)C(CN6CCN(c7ccccn7)CC6)SC5c5ccccc5)cc4)nc(N(C)C)n3)ccc12	19	43.3165	2908.81	9.6619	34	14	9	4	0	351.087	2432	8.19833	4.34184	4.27542	3.77513	2.98439	2.78123	2.71009	26.1505	27.55	21.1765	18.892	17.6766	17.9449	234.464	211.461	190.266	187.473	187.514	161.654	147.008	156.462	156.275	160.638	159.099	160.508	161.235	156.946	134.844	69.4976	-40.0361	13.2042	-44.6222	-115.654	-87.873	8.87261	19.8392	-0.570817
4019	C[C@@H]1CC[C@H]2[C@@H](C)[C@@H](OCCCN3CCN(c4cc5c(cc4F)c(=O)c(C(=O)O)cn5-c4ccc(F)cc4)CC3)O[C@@H]3O[C@@]4(C)CCC1[C@@]23OO4	5	41.3072	144367	13.5094	16	13	3	8	2	483.792	2234	8.22917	3.11307	2.75	5.0395	2.69537	3.08687	2.71288	23.2708	25.3398	18.7456	15.6279	14.0777	12.9853	211.537	192.904	154.476	147.42	152.386	165.249	146.582	155.211	159.042	161.492	163.24	165.389	164.012	166.458	159.382	117.187	12.3264	-49.5278	34.1319	-44.1181	2.04861	6.88889	26.9383	1.94824
2419	O=C(Cn1c2ccccc2c2nc3ccccc3nc21)N1N=C(c2cc3ccccc3o2)CC1c1ccccc1[N+](=O)[O-]	12	35.1578	800.592	8.14397	32	10	6	4	0	344.417	1760	10.4	6.84706	6.39665	5.29872	4.0158	3.94608	3.5121	27.0769	28.9861	22.6242	22.135	21.6824	20.1788	261.313	230.887	214.505	222.915	221.338	157.872	144.726	148.355	156.07	157.174	159.94	157.474	156.251	157.22	72.1922	39.5221	-17.8279	-91.0324	-62.2985	-26.5995	-24.5633	8.68379	13.4137	2.6329
1827	C(=N/c1ccccn1)\c1cccc2ccccc12	15	14.0613	161.862	5.67453	16	2	2	0	0	89.1111	686	7.4	4.34211	2.84211	2.97037	2.56061	2.76316	2.55263	22.8667	25.5	17.8889	15.8276	17.7368	14.3947	254.53	215.561	185.163	189.147	215.332	155.673	141.275	145.851	152.343	155.351	156.706	158.772	153.338	153.333	18.9422	-11.1778	-15.7867	-33.6756	3.42667	9.19556	-17.8311	-35.5644	4.27556	-1.97778
677	Cc1nn(-c2ccccc2)c(Cl)c1C1CC(C2C(=O)N(C)C(=O)N(C)C2=O)=NN1	21.8	22.9079	226.982	6.48958	11	10	6	3	1	264.089	1478	9.3251	4.32906	4.67125	5.50185	3.02884	2.84305	3.33677	30.7917	28.6471	25.018	23.8387	17.3462	20.6082	234.384	222.83	187.073	171.616	171.799	164.885	150.677	158.776	158.604	165.145	164.738	164.102	163.063	167.604	89.0319	50.4132	-86.9537	-98.5645	-64.6818	-75.4774	80.1632	88.7246	17.3659	1.50738
415	Cc1ccc(OCC(=O)N2N=C(c3ccc(Cl)cc3)CC2(O)c2cc(F)c(Cl)cc2Cl)cc1	24	25.9861	800.656	7.87935	18	9	2	3	4	275.523	2120	9.27088	6.07819	4.80193	5.40241	4.04544	4.14781	3.51765	41.5686	31.5	27.8376	26.2984	28.4537	25.1652	265.66	234.91	198.734	214.423	234.203	159.97	144.096	149.548	156.729	158.349	161.883	162.404	155.925	157.834	53.2181	-1.18621	-54.8615	34.0324	66.0203	-51.8027	-29.7468	-41.3831	9.81315	-7.0173
3612	C(=C/c1ccccc1)\C(=N/Nc1nc(-c2ccccc2)cs1)c1ccccc1	8	21.8394	354.653	6.90076	23	4	3	0	0	132.337	1286	6.90307	4.42146	3.84444	2.81568	2.63329	2.67674	2.51996	27.3617	27.76	18.8673	18.5426	20.8391	19.0333	257.058	208.711	205.384	215.954	219.589	155.267	141.922	144.433	153.024	156.313	157.022	155.748	154.861	152.75	24.9504	-20.2304	-11.1835	-12.8605	18.9936	-5.45088	-29.6416	-36.2727	5.54866	-4.69217
3908	N#CC1C(=N)N2C(NC(=O)C3C(c4ccc(Cl)cc4)CSC32)C(C#N)C1c1ccc([N+](=O)[O-])cc1	6	27.5984	516.211	7.49928	12	11	6	3	1	369.12	1914	9.4824	4.89525	5.95152	6.83555	4.09671	3.66281	4.65746	35.4444	31.2414	23.1242	22.642	22.097	24.0182	258.607	226.201	197.999	190.164	193.799	160.292	145.567	147.205	154.23	158.07	158.042	162.85	163.373	160.879	32.4776	-10.3954	-50.7066	-37.8139	30.3707	-1.66248	-43.9237	-3.79456	9.49931	-6.18896
156	CC(NCCC(=O)c1ccc(Cl)cc1Cl)C(O)c1ccccc1	29	17.3558	194.036	6.10095	12	5	1	2	2	171.816	1422	6.12404	2.53704	3.00342	4.09086	2.38473	2.83141	2.61108	33.8571	26.7209	19.84	19.932	14.5769	18.2	235.665	190.764	150.7	143.771	155.046	159.862	144.052	150.051	158.172	160.013	161.943	163.909	162.255	157.503	24.8285	-10.6694	-23.5995	-50.9534	-11.0919	-6.72977	10.4815	21.5706	6.02098	-6.32596
2334	CO[C@@H]1O[C@H](CNC2=C(Br)C(=O)c3ccccc3C2=O)[C@H]2OC(C)(C)O[C@@H]12	13	21.4952	252.21	6.52351	6	8	1	6	1	229.974	2362	9.00143	4.66094	5.01221	4.89307	2.88387	2.97739	3.19442	50.2553	30.14	27.7241	24.1301	22.9278	24.5	232.203	207.02	169.657	161.13	172.618	161.084	145.125	154.414	158.389	159.182	161.723	163.809	162.297	162.617	72.3028	20.1865	-67.6591	-34.3518	-66.2392	-61.95	138.461	140.513	13.5215	3.26573
285	CCOC(=O)c1cnn(-c2nc(-c3ccc(Cl)cc3)c(C#N)c(=O)n2C)c1N	25.67	21.3962	264.713	6.60827	17	10	6	3	1	266.561	1438	10.549	5.01375	4.9065	6.19909	4.52694	3.81861	4.47139	33.4419	30.2	27.3103	26.1828	20.433	22.6829	248.897	238.898	225.784	208.887	186.729	163.907	150.405	157.853	158.543	164.842	159.828	163.087	165.886	164.599	78.6221	90.87	33.0465	-55.0242	-123.391	-89.3189	-34.4829	-31.5901	15.7123	6.80043
3405	O=c1c2cc(I)ccc2nc(Cc2ccccc2Nc2ccccc2)n1NC1=NNC(c2ccc(O)cc2)C1	9	31.1982	756.149	7.98922	28	9	6	2	1	252.634	4336	8.141	4.9286	4.6709	3.9474	3.10786	3.01869	2.87075	67.75	30.7971	23.8824	21.8679	21.6982	23.8036	256.758	214.044	201.373	212.56	202.345	158.974	146.627	148.998	157.361	160.609	160.248	158.387	158.756	157.592	47.2495	-12.7185	-38.2801	6.7691	26.7274	-54.5409	-20.6249	-14.1009	9.36841	-8.22217
2846	O=C(O)CNC(=O)c1ccc(NC(=S)N/N=C/c2cccc(Br)c2)cc1	11	19.5984	277.877	6.58269	12	9	4	3	1	237.259	2496	8.9637	4.67284	4.62734	5.7868	3.34642	3.60345	3.42174	60.878	33	25.9524	24.6173	25.5167	37.0556	258.26	209.885	198.357	196.5	204.327	160.426	149.221	151.589	157.347	162.088	161.037	160.745	159.818	158.908	15.4163	-34.4842	-51.9129	-30.9458	41.2694	14.5533	-29.77	-9.71035	1.22249	-8.68471
1591	O=c1oc2ccccc2cc1-c1nnc(Sc2nc(Oc3cccc4cccnc34)nc(N3CCN(C(c4ccccc4)c4ccc(Cl)cc4)CC3)n2)o1	16	43.6954	650.734	8.1645	43	14	8	4	1	311.425	2662	9.51867	5.20621	5.9883	3.75211	2.79826	2.68188	2.9358	32.0723	30.6044	23.4643	22.109	21.4324	24.4895	262.108	227.508	214.984	205.56	194.079	158.333	144.625	151.62	154.146	159.11	157.694	156.678	162.079	160.144	92.6016	51.8221	72.8722	45.5424	20.337	51.3674	97.7831	29.1234	11.9914	-0.693279
4233	COC1=Cc2cc(O)c(OC)c3ccc(-c4ccccc4)c(c23)C1=O	1	19.6538	215.292	6.28829	16	4	0	4	0	197.278	1028	9.17073	3.64444	2.1039	4.81165	3.43094	3.49537	3.1342	25.0732	26.7727	24.4659	22.28	16.1556	12.9221	250.165	262.741	213.182	186.905	178.696	155.199	140.717	146.401	145.348	147.394	151.441	155.239	155.264	159.604	51.8126	24.0393	37.4057	-38.4658	-78.7733	-23.6104	-80.4997	-118.98	17.3492	11.21
3970	Cc1ccc(-c2cc(-c3c(-c4ccccc4)[nH]c4ccc(Cl)cc34)c3c(=O)[nH]cnc3n2)cc1	5	27.5414	410.759	7.24178	31	6	4	1	1	196.422	1576	8.55858	5.51282	4.05308	3.70607	3.2238	3.22729	3.13912	29.7358	28.3793	23.0082	21.9	22.8077	21.2675	266.843	247.918	245.172	257.156	232.716	155.891	142.828	145.97	149.282	153.15	152.067	149.032	152.849	157.919	52.2373	29.2378	24.5238	54.4595	36.5066	-10.0616	-114.298	-161.854	13.0498	3.98469
1732	COc1ccc2cc(C(C)C(=O)NCC3NNC(=S)N3N)ccc2c1	15.9	19.3272	205.351	6.24101	10	8	5	2	0	177.153	1262	7.1401	2.76923	2.73946	3.85114	2.98299	2.80491	2.52036	27.4348	26.2708	20.066	15.2222	15.8352	14.6552	219.536	199.592	148.709	165.54	160.361	164.635	152.525	157.615	158.213	161.285	164.292	160.991	163.252	166.774	49.9494	-14.0512	-94.4896	-72.1327	54.2415	10.8624	-42.1993	-9.90485	11.7079	-6.75709
113	CN1CCN(Cn2nc(-c3ccncc3)n(-c3ccccc3)c2=S)CC1	30	20.5227	279.749	6.5894	17	7	6	0	0	120.041	1256	6.59259	2.70871	2.24679	2.50086	2.50367	2.21972	2.22525	26.1667	26.1373	19.2456	16.7364	16.5586	14.1731	224.736	195.359	185.694	216.936	177.59	163.584	149.728	161.417	159.207	163.731	166.601	153.968	159.308	158.729	59.9034	-3.19579	12.7072	75.7749	-6.23187	-82.1981	-64.8258	-84.2253	10.6667	0.555556
4335	Oc1[nH]nc2c1C(c1ccccc1)CC(c1ccccc1)=C2	0	17.5849	184.497	6.00609	17	3	2	1	0	131.944	862	7.21053	3.23077	2.03226	3.47222	2.77061	2.86752	2.66398	22.6842	25.2683	17.7802	16.3402	14.6282	11.4194	243.347	214.043	187.012	182.943	172.982	157.255	143.442	144.841	150.807	153.694	156.913	158.373	159.768	161.286	24	-7	-24	-14	15	-13	-52	-40	7.89197	-1.1856
4174	CC(C)(C)C(=O)Nc1nnc(-c2ccc(NC3CCCC3)c([N+](=O)[O-])c2)s1	3	21.1281	210.62	6.34331	11	9	5	3	0	271.705	1364	7.72889	4.06316	3.73039	5.4341	3.48835	3.8434	3.71868	27.28	27.1346	17.7339	15.9493	16.7474	19.2206	216.015	175.205	199.238	191.825	162.799	165.106	149.595	153.938	159.334	171.321	159.507	161.655	166.494	160.91	83.5541	80.725	60.7918	75.7419	13.8732	-71.2468	-92.6542	-98.4172	9.6088	-7.6508
1304	Cc1occc1-c1nnc2sc(-c3cc(-c4ccccc4)nc4ccccc34)nn12	17.26	24.5346	323.712	6.87847	29	7	5	1	0	147.448	1408	9.56543	6.10465	5.73171	3.27662	2.80525	2.79931	2.89137	31.2889	31.24	25.5158	24.9688	23.1395	21.061	271.931	249.05	238.671	245.875	237.99	156.423	143.888	147.404	152.038	153.42	157.8	153.138	151.182	153.984	59.6505	23.9427	-10.352	0.106502	-12.4415	-69.2065	-9.46112	-32.2457	12.1728	4.55556
2930	COc1ccc2nc(C)cc(-n3cc(CN4CCCCC4)nn3)c2c1	10	19.7871	308.629	6.64843	15	6	5	1	0	128.417	1016	6.83333	2.71111	2.33784	2.67535	2.65965	2.44074	2.34122	21.1667	24.3922	16.4211	14.7154	14.0111	14.4595	212.39	185.815	172.954	166.326	156.742	164.664	148.803	158.101	160.528	163.202	162.93	165.953	168.296	160.854	85.4375	40.9375	13.125	55.9375	25.5	-74.5625	-112.125	-111.375	11.918	3.68533
40	Cc1cc(SCc2nnc(-c3ccc([N+](=O)[O-])cc3)s2)nc(SCc2nnc(-c3ccc([N+](=O)[O-])cc3)s2)n1	35	30.7908	308.536	7.09282	28	16	8	4	0	378.291	2516	11.2687	5.9349	7	6.87803	3.15034	3.12577	3.85424	45.7455	38.8136	34.2523	31.2087	36.4848	30.3636	280.68	256.78	231.344	254.313	225.942	158.836	146.493	147.662	152.287	158.383	157.097	152.492	157.467	157.12	66.0939	32.1113	-66.2219	-159.095	-64.4824	49.7276	180.653	98.7685	5.43008	-5.55669
3853	CCCCCCCCCCCCCC[N+]12CC[N+](CCCCC[N+]34CC[N+](CCCCCCCCCCCCCC)(CC3)CC4)(CC1)CC2	6	36.7696	176339	13.6694	0	4	4	0	0	203	1908	1.68794	0.580952	0.622871	1.43972	1.3667	1.36548	1.36071	13.5319	17.5	8.92478	7.18591	7.62857	7.91241	162.349	128.763	103.362	112.676	111.923	167.114	147.711	159.274	163.541	164.608	168.095	166.002	165.94	167.328	39.5045	-38.6914	-54.4924	-26.3375	28.272	1.76068	13.7154	11.968	18.0948	-15.0748
1701	COc1ccc(OC)c(/C=N/N=c2\scc(-c3cc(O)ccc3O)n2-c2ccc(Cl)cc2)c1	16	25.5414	774.944	7.84671	23	9	3	4	1	224.509	1832	8.83112	5.17307	5.03883	4.23601	3.15394	3.3867	3.19788	34.566	30.7321	26.2762	24.1466	26.6449	23.7282	254.384	243.536	208.346	207.277	217.956	158.348	144.968	150.052	152.258	155	157.282	158.554	159.132	154.839	53.3814	-13.6599	-54.1958	-21.2681	55.7677	-17.9526	-74.165	-29.124	14.9074	1.72517
2987	CSc1ccc(Cc2nn(CN3CCN(C)CC3)c(=S)n2/N=C/c2ccc(F)cc2)cc1	10	24.9556	449.241	7.27071	17	9	6	0	1	201.267	1742	6.82863	3.82787	3.11443	3.41131	2.66895	2.46645	2.32652	29.5254	27.7097	20.3481	15.3226	22.3607	18.8657	227.299	197.243	165.153	211.74	207.384	164.317	148.748	159.53	159.375	164.211	168.909	160.753	157.901	158.791	80.2607	1.83402	-39.8346	58.746	60.9267	-43.9993	-57.2462	-29.2373	11.3631	-6.7245
2158	CCOC(=O)C1=C2c3ccccc3S(=O)(=O)N2CC1	14	14.951	165.688	5.75196	6	6	1	4	0	216.994	1042	9.32639	1.50314	0.648649	6.78106	4.91781	2.47414	3.03979	32.5625	35.3529	25.0135	24.507	12.0189	10.4865	237.983	219.613	191.467	157.074	127.908	159.77	142.614	153.133	154.229	156.124	157.555	161.017	165.74	163.8	21.1884	82.1793	29.1224	-100.157	-149.118	31.2209	16.8563	-26.6506	11.377	12.5439
1729	COc1ccc(-c2nnc(-c3sc4ncnc(N5CCOCC5)c4c3C)o2)cc1	16	23.1608	439.8	7.15103	20	9	5	3	0	158.17	1432	9.17593	4.73118	4.04701	3.29521	2.77175	2.6359	2.77762	29.8333	30.0192	25.0495	22.8108	20.5806	18.3077	240.072	228.33	194.116	195.446	183.858	161.858	147.092	157.254	154.995	156.898	163.402	158.052	160.338	162.748	81.3989	28.5727	-23.087	-41.886	-67.5245	37.3532	64.4902	-89.735	15.4184	8.44488
3990	Cc1c(/N=C/c2ccccc2[N+](=O)[O-])c(=O)n(-c2ccccc2)n1C	5	19.3153	317.781	6.67765	17	7	4	3	0	262.444	1052	9.7561	4.79268	5.15584	6.40108	3.31667	3.28184	4.73304	25.6585	27.3256	22.5647	19.6632	17.3049	17.5325	237.636	223.25	179.361	195.388	179.618	162.007	148.482	154.464	158.061	160.29	164.647	156.728	160.469	163.982	65.4884	53.3867	-3.20642	-86.0815	-103.606	-15.9762	33.0488	47.4497	12.6835	2.28911
3131	N#Cc1ccc(Nc2nc(Oc3ccnc4ccccc34)nc(N3CCN(c4ccccc4)CC3)n2)cc1C(F)(F)F	10	33.447	426.787	7.49137	28	12	8	1	3	414.09	1802	10.8923	7.63504	7.39706	6.37062	3.35173	3.92863	3.52951	27.7231	28.7286	21.5132	20.8012	22.3942	23.1324	247.915	217.191	189.825	191.431	208.126	166.815	148.766	159.372	159.44	163.712	168.19	167.027	167.958	159.166	76.8757	97.32	22.0963	6.94343	20.6083	-49.1981	28.346	-5.4045	7.2	-0.92
3959	CCOC(=O)C1C(=O)C=C(c2ccccc2)CC1c1ccc(OC)c(OC)c1	5	21.1893	248.271	6.54414	12	5	0	5	0	234.25	1172	7.73077	4.14184	3.33846	4.50481	3.10594	3.22833	3.10769	22.5385	24.4444	19.0769	18.5538	15.4113	14.6538	222.478	212.091	180.952	177.525	166.849	159.261	142.429	151.234	152.041	152.275	156.938	156.64	159.105	159.389	70.3728	7.77663	-27.75	-45.0769	-86.2604	-8.72337	89.7234	23.1538	15.5266	5.83432
585	O=C1S/C(=C\c2ccc(S(=O)(=O)Nc3nc(-c4ccccc4)cs3)cc2)C(=O)N1C(=O)c1ccc(Cl)cc1	22	30.1496	769.651	7.98094	23	12	3	5	1	373.562	2476	10.3507	6.31502	5.74858	6.91781	4.21019	4.31652	4.09841	45.8519	39.7759	30.9915	30.7563	30.5495	36.0235	289.166	250.092	241.62	245.409	242.539	153.823	140.372	144.757	149.378	155.697	153.525	152.365	152.511	151.237	1.95693	21.7345	31.5182	-1.51269	9.1861	-80.8905	-66.7028	-81.4363	4.53224	-6.69959
1354	Cc1c(C(N)=O)sc2nc(C)n(N)c(=O)c12	17	12.3941	75.3594	4.79227	9	7	4	2	0	180.865	914	9.78632	1.33333	0	6.95633	4.92693	4.20988	3.30435	35.1538	31.963	33.6458	26.0536	11.4444	4.78261	235.589	257.807	151.79	143.924	115.28	165.905	154.311	157.443	156.422	156.874	169.743	167.651	170.071	186.083	51.0999	44.3373	-54.2117	-64.1729	-87.4043	12.4497	-11.5582	-2.48784	12.9408	4.39645
3789	O=C1C(Cl)C(c2ccccc2Cl)N1c1ccc(-n2c(Cc3ccccc3Nc3c(Cl)cccc3Cl)nc3ccc(Br)cc3c2=O)cc1	7	37.6358	2049.63	9.17298	34	11	4	2	5	272.099	4024	8.42124	4.95177	4.90402	3.88714	2.95521	2.84178	2.77784	57.4857	33.8026	30.0479	28.9773	24.9167	24.543	286.955	249.94	238.246	238.892	226.798	154.94	141.991	145.904	153.327	154.348	154.229	152.743	152.805	154.887	52.9938	0.94059	-29.8722	-29.3141	-41.4253	-67.1927	13.7879	25.0944	12.4339	-6.25612
645	CC(C)N1CCN(c2nc(Nc3ccc(C#N)c(C(F)(F)F)c3)nc(Oc3ccnc4ccccc34)n2)CC1	22	30.8373	333.794	7.1715	22	12	8	1	3	403.09	1696	10.2812	7.99167	6.6194	6.29829	3.34333	4.26759	3.49015	26.5	27.6324	20.5033	18.9762	24.4167	22.291	232.908	207.159	166.258	183.372	222.857	169.257	150.187	162.508	161.465	165.008	171.82	171.265	167.231	160.515	108.191	151.325	63.5303	139.945	165.227	-29.7002	-62.2891	-85.5098	10.9229	1.39575
3720	CC1(C)Oc2ccc3ccc(=O)oc3c2[C@H](OC(=O)c2ccccc2)[C@H]1Br	7	21.555	348.033	6.84555	16	6	0	5	1	221.446	2318	9.29698	3.93162	3.59541	5.03287	3.9567	3.33859	3.60407	52.6818	30.8936	31	24.7563	26.1827	19.8804	254.719	230.149	219.394	217.814	205.783	156.207	140.969	147.203	151.557	156.836	154.329	153.502	155.812	151.27	69.9241	53.6927	-32.1373	43.0178	-68.0242	-11.3094	-130.875	-84.07	10.1875	-1.9375
769	COc1ccc(F)cc1-c1cccc(-c2nn(CCOC3CCCCO3)c(=O)o2)c1	21	23.3915	599.279	7.49434	17	8	2	5	1	264.722	1314	9.20755	5.13393	5.23913	4.99476	3.16256	3.52455	3.72947	24.7925	26.4821	18.4344	17.5455	17.3393	18.7065	222.225	189.366	183.143	176.107	163.609	164.073	146.596	156.374	160.207	161.007	160.816	161.718	167.528	165.533	80.4535	49.0295	-9.90815	-65.6002	33.9334	41.7569	41.7939	-45.4247	9.44073	3.02599
1831	Cc1ccc(/C=C/C(=O)c2ccc(Nc3cc(=O)oc4ccccc34)cc2)cc1	15	22.8343	880.208	7.84487	22	4	1	3	0	224.5	1160	8.41667	4.39535	4.03797	4.67708	3.47727	3.30685	2.95851	24.1667	26.0196	19.3679	16.5225	16.9302	15.557	251.479	220.624	191.451	207.85	198.765	155.227	141.004	144.615	150.806	155.576	155.966	152.588	153.786	154.759	46.25	5.27778	-37.2222	-1.41667	13.4722	-18.5556	-45.9444	-1.30556	7.28255	-6.44358
604	Cc1cnc(N2C(=O)CSC2c2cc3ccccc3nc2Cl)s1	22	18.4703	154.259	5.87155	15	7	3	1	1	137.123	1600	8.35697	3.83789	3.11329	3.91781	3.01364	2.72084	2.70007	45.7143	36	30.6216	34.9615	23.377	19.6078	279.804	252.429	262.649	229.645	208.706	155.706	142.037	148.342	149.742	157.272	150.724	155.101	153.713	157.509	40.7486	9.93554	-29.2822	-35.4245	-31.7426	-18.5813	0.711424	2.60117	7.83102	1.93796
1115	CC(=O)N1CCN(Cc2c(O)on[n+]2-c2ccc(Cc3ccc(-[n+]4noc(O)c4CN4CCN(C(C)=O)CC4)cc3)cc2)CC1	18	35.6882	550.842	7.81553	22	14	8	6	0	364.583	1930	7.87952	3.70833	3.9779	4.39257	2.88679	2.91146	2.49847	23.253	25.75	17.9118	14.7295	15.3438	15.4586	211.507	190.86	154.534	165.615	166.876	165.785	150.941	160.053	161.272	162.12	165.374	165.986	163.567	160.955	123.4	20.3574	-118.018	0.0702569	54.8895	-227.278	-116.683	124.175	18.6654	-10.2947
173	Nn1c(CS(=O)(=O)Nc2ccc(Cl)cc2)nnc1CS(=O)(=O)c1c[nH]cc1S(=O)(=O)c1ccc(Cl)cc1	28	29.2598	1092.19	8.30428	22	17	6	6	2	433.159	2762	10.1917	5.07062	6.76128	7.87562	4.08756	4.07337	5.90896	50.2182	46.2069	33.3228	33.1119	30.9153	28.8545	265.206	231.174	207.217	204.697	205.695	161.87	147.074	151.324	157.484	161.881	162.702	161.748	164.592	165.236	-31.3937	45.7332	-109.097	12.2108	121.085	-74.184	-132.739	77.1926	3.56099	-8.62579
313	O=C1Nc2ccc(Br)cc2/C1=N/N1C(=S)NNC1CCc1ccccc1	25	20.6321	498.726	7.16757	12	8	5	1	1	157.286	2454	7.98837	3.40783	2.89707	3.74492	3.1957	2.74557	2.41847	58.4286	32.3778	24.87	22.3438	24.0575	32.1375	258.424	204.712	201.366	213.536	199.187	160.227	149.114	152.217	159.304	161.672	160.553	160.294	161.503	159.862	36.5218	9.64968	4.13072	7.04769	25.1605	-35.4683	-112.555	-24.6538	5.69388	-3.26304
1419	O=c1cc(COc2cccc(OCc3cc(=O)oc4c3ccc3ccccc34)c2)c2ccc3ccccc3c2o1	17	32.4222	407.365	7.396	34	6	0	6	0	284.389	1630	9.83871	5.43939	5.24031	4.58692	3.34084	3.38131	3.20155	26.2903	28.0588	22.1103	20.2403	18.9697	17.814	264.222	241.698	200.687	211.957	207.783	153.095	139.217	143.687	147.854	150.533	155.256	152.175	152.168	156.222	57.7648	-1.8845	-34.5328	-36.6597	-34.9063	-46.5525	-9.36733	-25.3788	10.6722	-0.215401
208	COc1cc(/C=C/C(=O)c2ccc(O)cc2)ccc1OCc1nnc(-c2ccccc2)o1	27	24.8462	362.787	7.05697	23	7	2	5	0	247	1338	9.5	5.33333	5.06818	4.75	3.72193	3.32639	3.23043	25.7308	27.3273	21.1238	18.6147	18.0833	18.2614	245.734	218.575	190.668	197.088	187.97	158.037	143.689	148.891	152.977	156.755	158.738	157.18	159.389	157.36	54.0533	-3.99408	-43.5207	-67.6805	-26.7692	21.2426	26.3195	-19.9763	8.98669	-5.50148
3208	Cc1ccc(OCc2ccccc2-c2nnc(-c3cccc4ncccc34)o2)cc1	10	23.9488	548.996	7.4067	27	5	3	2	0	157.75	1194	8.61224	5.5625	4.60638	3.21939	3.02841	2.84583	2.7169	24.3673	26.8491	20.4857	18.7321	20.15	17.766	251.862	226.641	191.122	214.256	236.771	156.896	142.612	147.674	150.704	156.33	162.127	157.956	148.791	153.022	61.2482	26.439	1.96501	6.15452	8.33403	-58.743	-34.7701	-22.8401	10.5689	-0.543524
2302	COc1ccc2c(c1)CCC1=C2N=c2s/c(=C\c3c(C)[nH]c4ccccc34)c(=O)n2C1c1ccc(F)cc1	13	30.9556	521.601	7.5919	26	7	3	2	1	270.087	1752	8.68459	5.06911	5.68333	4.35624	2.9805	3.08928	3.64597	28.2581	28.6029	23.3557	20.7	19.689	21.1143	255.025	242.217	219.61	211.373	202.364	157.809	142.43	147.913	150.38	153.775	153.132	153.549	156.8	157.884	77.9016	20.7892	-61.6794	-86.4521	-4.06486	49.3806	12.2162	-36.039	19.4506	6.60874
3900	COc1ccc(C(=O)ON=C2CC(c3ccc(O)c(OC)c3)N(C)C(c3ccc(O)c(OC)c3)C2)c(OC)c1	6	29.8125	686.129	7.89204	18	10	2	8	0	321.861	1686	8.50704	4.26042	4.15736	4.53326	3.01947	3.11285	3.2304	23.7465	25.6216	21.549	17.4948	16.875	16.1777	218.231	220.86	165.565	168.802	176.383	161.979	146.305	155.598	153.127	156.965	160.47	161.575	161.43	159.661	108	6	-58	-66	-26	-88	-54	5	24.1629	0.368181
227	Cc1cc(SCc2nnc(-c3ccc(Cl)cc3)n2N)nc(SCc2nnc(-c3ccc(Cl)cc3)n2N)n1	27	29.2957	306.758	7.03439	28	14	10	0	2	193.517	2428	8.52805	4.10169	4.20444	3.39504	3.00526	2.4494	2.7363	42.5965	34.3607	29.8522	27.72	26.4576	27.22	263.109	239.915	206.393	211.627	194.276	162.772	151.101	153.787	157.725	163.575	162.503	160.786	163.167	161.81	78.6671	36.5136	-117.881	-159.377	34.5769	39.1473	80.5766	-56.2441	12.1773	-4.55125
411	O=C1/C(=N\N2C(=S)NNC2CCc2ccccc2)c2cc(Br)ccc2N1CN1CCOCC1	24	26.208	956.738	8.05745	12	10	6	2	1	191.536	2756	7.33641	3.63589	2.92507	3.30235	3.07475	2.85319	2.35476	47.5172	29.7742	21.8828	19.1722	23.7365	27.5724	236.394	193.415	189.639	211.329	196.621	162.491	149.333	157.633	160.362	162.696	162.461	158.817	159.772	162.843	59.2738	-4.17053	14.747	43.8508	34.6658	-104.274	-170.334	-69.8991	10.085	-0.308561
4298	C=C1CC[C@H]2C(C)(C)CCC[C@]2(C)[C@H]1CC(=O)Nc1ccncn1	0	18.855	573.407	7.22706	6	4	3	1	0	163.764	960	4.86792	1.88596	1.875	3.08988	2.17192	2.48684	2.65451	18.1132	21.0727	14.0974	10.4272	11.5175	12.0938	194.681	182.433	120.956	103.437	137.244	164.484	145.99	153.406	153.592	160.465	163.456	171.985	165.534	168.052	64.5589	7.32787	-51.0388	37.053	85.2545	66.5582	-20.1983	-97.9267	14.5771	-7.04877
2356	Cc1ccc(-c2nn3c(-c4nc5ccccc5[nH]4)c(-c4ccc(F)cc4)nc3s2)cc1	13	25.3915	375.786	7.06042	29	7	5	0	1	200.226	1462	9.58392	6.74638	5.57407	4.26012	3.35458	3.24725	3.34774	31.1064	30.7308	24.7745	23.2885	25.4348	23.6667	269.194	240.566	237.081	267.222	249.197	158.911	144.7	148.24	154.322	160.333	158.767	154.837	155.686	153.638	54.6232	22.9161	3.59051	42.2275	21.4421	-49.574	-74.0176	-101.432	10.7623	2.44907
1828	O=c1cc(-c2ccc(Cl)cc2)oc2cc3oc(-c4ccc(Cl)cc4)cc(=O)c3cc12	15	24.2365	329.88	6.89734	26	6	0	4	2	219.455	1710	10.6002	6.16817	5.94097	5.22512	4.85764	3.53148	3.13606	40.7143	32.6087	27.4639	24.9362	24.8919	28.3281	295.498	260.071	239.515	246.908	237.853	150.957	137.961	140.678	148.161	150.978	150.753	150.239	150.747	152.092	31.9148	-4.73934	-18.9054	8.44892	25.3588	-11.444	-48.6594	-15.5469	4.322	-6.66213
3415	CCOC(=O)C[n+]1c(I)c(I)n(C)c1C	9	10.9514	112.647	5.12973	5	6	2	2	2	110.74	6181	6.71601	0.429885	0.0385185	3.95499	2.85874	2.66564	1.62247	220.75	44.7857	105.717	44.7018	35.5862	24.3333	258.914	246.156	153.826	162.511	187.931	162.747	149.111	163.788	159.572	152.62	163.505	167.757	157.263	160.041	54.3889	12.5388	-89.9182	-23.9821	61.5969	-69.1225	-82.0562	5.17973	10.3929	2.74107
1668	CC1(C)O[C@H]2O[C@H](CNC3=C(Br)C(=O)c4ccccc4C3=O)[C@H](O)[C@H]2O1	16	20.8975	210.075	6.30298	6	8	1	6	1	247.724	2324	9.34244	5.35708	5.4883	5.63009	3.34941	3.56798	3.99903	52.8182	30.8298	27.7257	24.5351	26.7051	25.5395	236.997	203.265	166.206	183.553	185.81	160.78	145.292	152.561	159.276	160.024	164.853	159.868	158.569	164.273	57.2062	21.3022	-66.3007	-32.4341	-77.1733	-37.3142	107.333	77.7336	10.4959	-0.950413
4046	COc1cc(OC)c2ccc(-c3ccccc3)c3c2c1C=C(O)C3=O	5	19.6538	217.098	6.29664	16	4	0	4	0	197.278	1028	9.17073	3.15957	1.86747	4.81165	3.76061	3.50177	2.93775	25.0732	26.7727	24.3068	22.37	15.1596	11.1807	250.165	263.35	215.483	188.366	171.6	155.199	140.717	146.401	145.347	147.132	150.584	155.779	155.741	164.885	51.8126	21.0393	24.1618	4.2903	-10.0553	-125.456	-104.823	-64.3551	17.3492	11.21
1589	Cc1ccc2c(c1)C(Cl)=C(Cn1cc(COc3ccc4c(C)cc(=O)oc4c3)nn1)CCO2	16	26.3983	227.993	6.62324	21	8	3	4	1	211.116	1614	8.82918	5.02719	4.40893	3.83848	2.84011	2.91627	2.65419	29.3455	28.1017	22.9524	20.1888	18.7979	17.0928	243.113	227.885	182.538	171.101	189.131	159.668	144.824	152.028	152.55	158.369	159.271	164.146	160.339	165.149	89.6052	12.2443	-82.4051	-51.6341	-45.8171	3.89246	-14.5837	79.4381	11.841	-2.94678
1685	COc1cc(/C=C/C(=O)N2CCCCC2)cc2c1OCO2	16	16.2515	310.04	6.47864	6	5	1	4	0	156.139	900	7.75	4.24615	3.45	3.90347	2.84461	2.85128	2.78333	22.5	24.8571	16.587	15.2043	14.7385	15.95	211.893	181.096	155.93	161.418	156.365	162.38	145.763	157.105	157.914	159.989	161.889	160.173	161.486	159.22	59.495	33.3375	22.22	-17.5575	-77.9325	-40.1975	98.8625	3.5	8.65625	1.92188
1388	Cc1[nH]nc2c1C1(C(C#N)=C(N)O2)c2ccccc2-c2ccccc21	17	20.2358	189.589	6.16115	17	5	4	1	0	162.312	994	9.23077	1.38462	0	4.16186	3.53968	2.92308	1.73684	25.4872	27.7209	24.3548	23.7679	9.44231	3.31579	258.85	271.129	237.211	182.709	115.866	157.824	145.1	145.349	147.201	149.147	151.328	158.08	170.93	178.903	53.3872	58.0986	26.5483	-14.9776	-133.381	-184.174	-62.8034	119.037	20.0178	18.0888
10	CCn1cc(C(=O)NN)c(=O)c2ccc(C)nc21	39	13.561	100.188	5.19484	10	6	4	2	0	186.167	770	8.625	1.12698	0.564103	5.81771	3.80801	3.16667	2.16239	24.0625	25.5758	21.7015	20.5429	8.55556	6.25641	216.357	212.436	183.001	151.142	101.864	166.445	152.882	159.318	159.833	161.522	161.158	162.787	173.959	178.453	59.5664	63.7148	20.5117	-39.9766	-98.168	-122.859	-34.3164	53.8398	12.3906	6.35938
3935	C[C@@H]([C@H]1CC[C@H]2[C@@H]3CC[C@H]4C[C@@H](N(C)CCCc5ccccc5)CC[C@]4(C)[C@H]3CC[C@]12C)N(C)C	5.5	27.8839	4786.02	9.72622	6	2	2	0	0	151.347	1340	2.92135	0.768997	0.79932	1.70053	1.46076	1.4905	1.49187	15.0562	18.9677	12.3604	9.40415	7.77204	7.85714	181.362	170.268	113.978	112.731	116.15	163.958	144.46	154.002	154.731	159.32	165.014	165.73	164.724	164.882	68.5511	-26.2799	-103.537	-69.6142	13.4258	16.6103	17.9741	18.1607	27.9225	-5.95278
4243	O=C(NO)OC[C@H]1CN(c2ccc(N3CCOCC3)c(F)c2)C(=O)O1	0	19.2583	276.297	6.53777	6	10	3	6	1	308.167	1170	10.6977	5.78462	6.07407	7.16667	4.80926	4.17179	4.7428	27.2093	27.9778	19.3465	17.9804	18.5231	21.8148	212.037	183.653	163.651	150.355	158.486	169.312	152.604	162.524	164.572	162.769	166.361	172.543	172.232	164.42	49.6771	-4.74202	-43.6193	-58.7226	-9.92915	45.9822	18.239	-35.7642	6.42131	-1.53272
3930	Cc1ccc(C)n1-c1[nH]nc(N2CCOCC2)c1C#N	6	15.5325	133.242	5.58531	10	6	5	1	0	133.639	830	7.67568	2.43137	1.6	3.61186	3.03876	3.50654	2.1	22.4324	25.2821	18.642	17.011	15.1373	12.48	213.26	195.513	172.458	136.702	171.619	166.497	151.446	161.149	163.732	160.474	164.975	172.011	172.757	148.919	67.672	24.1848	-24.2155	0.00949598	-44.504	-100.076	-139.944	-21.0373	13.0577	5.35573
1138	Cc1cc(=O)oc2cc(Oc3nc(Nc4ccc(N5C(=O)C(CN6CCN(c7ccccn7)CC6)SC5c5ccccc5C(=O)O)cc4)nc(N(C)C)n3)ccc12	18	45.5757	4203.8	10.0842	34	16	9	6	0	437.642	2596	8.81713	4.92503	4.58824	4.55877	3.15958	3.37028	3.07591	27.0417	28.0485	21.9427	19.9962	18.9558	18.549	236.056	216.522	192.557	191.417	192.934	161.787	147.246	156.273	155.849	159.909	159.41	160.303	160.57	157.713	137.312	83.2747	-47.1923	-4.35725	-61.1518	-87.3299	-93.9473	-41.386	21.3289	0.498264
1302	C=CCCCCCCCCc1nnc(Nc2ccccc2)o1	17.3	16.2635	1323.15	7.97623	11	4	3	1	0	120.833	884	5.10638	1.65385	1.40541	2.57092	2.20881	2.12073	2.03604	18.8085	21.6667	11.3036	11.0374	11.5256	10.8784	198.867	139.885	141.2	143.591	145.359	164.349	147.372	154.123	163.985	165.32	166.465	166.253	164.475	163.666	58.3273	64.344	40.7424	27.2974	10.306	-27.5251	-50.6197	-46.3757	4.19692	0.179719
2437	COCCNC(=S)NNc1cc(C(F)(F)F)nc2c(C(F)(F)F)cccc12	12	20.6174	1129.68	8.02294	10	12	4	1	6	483.972	1556	14.0596	10.3539	5.33333	11.8042	5.99351	11.8106	4.71814	37.9512	31.8095	26.6867	25.25	30.8272	28.1864	235.039	219.183	200.958	197.565	180.555	181.703	156.963	172.632	165.518	172.758	174.225	178.63	194.731	173.837	50.1633	118.025	89.6213	65.9253	81.256	11.0989	30.9749	-54.4813	3.232	5.98453
974	CN(C)/C=C(\C#N)C(=O)Nc1nc2ccccc2s1	19	14.3894	168.968	5.77156	9	6	4	1	0	164.809	996	8.72401	5.08772	3.47059	5.31642	4.50362	3.577	3.39869	32.129	30.4062	23.9483	21.3333	22.4211	19.3529	247.263	221.132	215.651	190.712	207.043	161.454	147.471	156.755	152.925	164.691	157.61	169.64	157.103	155.749	39.0191	8.10915	31.9954	56.3237	-55.2921	-92.2694	4.91849	-51.6381	7.03954	0.371488
3426	COc1cc(/C=C2\S/C(=N/c3cccc(Cl)c3)NC2=O)ccc1O	9	18.6321	173.85	6.03366	12	7	2	3	1	185.953	1460	9.19052	6.03899	5.77778	5.02576	3.34205	3.75484	4.60576	39.4595	32.6923	27.3333	25.3857	25.4912	26.1556	265.957	236.323	216.993	213.781	205.547	157.129	144.011	148.342	152.06	155.411	155.436	155.517	159.913	154.981	25.1033	-16.6945	-27.7997	-35.4672	3.77716	6.3279	30.9944	-5.93043	6.03725	-2.66107
669	CC1=NC(=S)N(n2c(CCl)nc3ccccc3c2=O)C(=O)C1/N=N/c1ccc(C)cc1O	22	25.0007	557.786	7.48713	16	11	6	3	1	266.297	1804	9.91938	5.8835	4.48333	5.43463	3.79332	4.14547	3.50346	36.8163	31	29.0755	27.931	26.068	21.75	257.798	240.858	226.506	236.059	218.733	161.338	148.062	154.5	160.046	161.938	161.3	159.17	159.294	161.709	83.3979	70.0455	13.4835	-10.6403	-98.777	-40.4764	-36.9691	-110.184	14.641	4.25239
2585	O=C(O)c1ccccc1-c1nnc2c(Cc3ccccc3)nc3ccccc3n12	12	23.2298	362.495	6.95772	25	6	4	2	0	211.25	1168	9.46667	5.32353	4.15842	4.69444	3.59641	3.21187	3.37899	25.9556	27.8571	21.8824	21.785	19.5882	16.9307	258.761	233.144	226.571	232.552	222.581	157.574	144.119	147.013	153.512	158.068	158.977	156.73	153.223	154.403	43.64	38.24	37.32	8.72	-40.4	-80.88	-93.48	-63.84	10.5042	4.69679
221	Cc1ccc(NC(=O)Nc2ccc(-c3nc(Oc4cccc(C)c4)c4ccccc4n3)cc2)cc1	27	27.784	1140.97	8.2924	28	6	4	2	0	218.306	1392	8.0678	4.50806	3.82576	3.70009	3.2002	2.84229	2.90046	23.5932	25.9365	19.7209	17.5662	18.1855	15.8864	244.645	216.367	204.545	231.096	217.479	158.151	144.183	148.836	153.743	160.133	160.136	153.371	151.949	154.449	72.0922	38.2244	-6.05573	42.0167	-52.0471	-88.7673	-89.1413	-48.9569	10.6332	-3.49871
4191	c1ccc2c(c1)CCOC2Nc1nc2ccccc2s1	3	16.1421	115.532	5.44269	15	4	2	1	0	94.0868	1008	7.24837	4.0625	3	2.76726	2.25711	2.44213	2.40432	29.6471	29.2162	20.3924	19.3026	19.3958	16.119	250.331	206.986	172.717	192.111	210.923	156.848	142.832	148.493	153.943	156.978	161.715	158.637	153.575	148.156	20.5798	-17.9162	-14.7478	-29.1772	8.97386	18.7136	-17.1876	-60.8897	5.22491	0.487889
3251	CCSc1nnc(-c2ccccc2COc2ccc(Cl)cc2)o1	10	17.7062	233.066	6.28423	17	6	2	2	1	116.898	1398	7.89604	4.06968	3.2138	3.07625	2.6721	2.54345	2.54581	36.7895	31.225	23.4267	21.4306	23.5085	19	254.9	215.136	193.566	219.291	230.445	157.846	143.25	149.357	153.026	157.365	163.662	155.144	147.373	154.604	54.3083	46.2207	19.5138	-48.8673	-75.5352	-59.4995	-26.7268	-27.516	6.77285	2.68352
2517	CCNc1nc(Nc2ccc(C#N)cc2)nc(Oc2cc(=O)n(C)c3ccccc23)n1	12	24.0986	673.726	7.64423	22	9	7	2	0	237.25	1282	9.52	6.31183	5.69072	4.745	3.84433	3.52867	3.60195	25.64	27.5472	21.5701	21.1111	21.4839	20.4227	240.879	217.206	197.468	205.655	211.859	163.05	149.153	157.192	158.734	161.153	164.348	163.759	163.831	161.701	81.6672	87.8864	11.9968	-29.4608	-71.248	-61.9296	-102.597	-67.3472	11.8428	4.7736
1620	FC(F)(F)c1cccc(NCn2nc(-c3ccccc3COc3ccc(Cl)cc3)oc2=S)c1	16	25.9684	451.452	7.30639	23	10	3	2	4	332.526	1908	10.921	5.61778	6.27135	6.65052	3.29979	3.40539	3.65085	38.16	31.5094	24.9813	21.8407	24.35	23.9684	261.278	224.507	200.204	221.915	215.016	165.013	147.253	156.94	156.075	163.565	165.979	160.406	159.516	161.843	45.0281	41.0262	-24.0133	-50.8583	-17.3654	-105.957	-25.8765	57.0716	2.4252	-5.5692
2494	O=C(O)c1ccc(NC(CC(=O)c2cc3ccccc3oc2=O)c2ccccc2)cc1	12	24.277	408.413	7.14368	22	6	1	5	0	305.528	1288	9.36	5.06957	5.04425	6.11056	3.72633	3.61401	3.5413	25.76	26.8868	19.8462	18.2033	18.4261	18.115	250.076	214.573	190.764	203.629	204.937	156.436	142.074	145.17	152.728	156.741	157.093	155.119	153.785	154.777	34.3472	7.2464	-26.6992	-20.7248	6.6304	-2.904	-55.464	-35.1488	6.4028	-7.6264
4125	Cc1ccccc1NC(=O)c1cn(CCO)c2c(cc(Cl)c3ncccc32)c1=O	4	22.701	434.111	7.13801	20	7	3	3	1	245.339	1438	8.80011	4.87107	3.65591	5.21997	3.89785	4.48591	3.44108	30.5957	28.14	24.0833	23.3621	21.217	18.0645	250.212	233.976	210.934	196.69	188.471	159.069	144.943	150.406	153.939	157.041	155.011	158.887	160.535	162.42	49.9147	29.8454	23.3674	4.9075	-19.9215	-87.1532	-54.6976	-91.7627	13.7913	6.45315
2761	Cc1cccc2c1OCCC(Cn1cc(COc3ccc4c(C)cc(=O)oc4c3)nn1)=C2Cl	11	26.3579	275.32	6.81186	21	8	3	4	1	211.116	1614	8.82918	5.02719	5.03137	3.83848	2.66781	2.8418	2.88773	29.3455	28.1017	23.2302	20.5455	18.266	19.3647	243.113	228.973	183.543	158.603	180.232	159.668	144.824	152.028	152.549	158.19	158.469	164.764	163.721	162.358	90.6052	19.2443	-83.9707	-101.745	-52.9086	75.426	19.6789	24.4103	12.841	-1.94678
1185	N=C1C(=S)N(c2ccc(Cl)c(Cl)c2)C(=O)N1c1ccc(Cl)cc1	18	18.0105	177.802	6.01358	12	8	3	1	3	147.335	1882	9.52449	3.764	2.90329	4.75275	3.62909	3.04172	2.30646	60.7097	38.2121	39.791	33.3692	45.3721	33.7778	311.498	277.491	248.56	260.748	259.174	155.233	144.591	147.816	153.53	154.171	156.371	155.338	153.268	152.649	20.3111	10.4838	8.63905	-6.77165	-68.2545	-56.2565	-24.5322	9.81069	5.48491	-3.29553
3086	COc1cccc(-c2cc(=O)c3cc4c(=O)cc(-c5cccc(OC)c5)oc4cc3o2)c1	10	25.432	401.424	7.15817	26	6	0	6	0	254.333	1338	10.36	6.16327	5.40909	5.08667	4.39153	3.79592	3.23106	26.76	28.2222	24.2243	22.0175	19.9184	19.0114	257.386	250.465	209.943	218.169	207.502	154.758	140.487	146.746	148.245	150.869	153.855	152.53	154.644	153.883	68.6944	2.4768	-56.0448	9.6704	82.6512	8.608	-17.9072	-49.2832	13.76	2.32
1542	COc1ccc(OC)c(/C=N/N=c2\scc(-c3cc(O)ccc3O)n2-c2ccccc2)c1	16	24.7249	745.252	7.77687	23	8	3	4	0	224.92	1544	8.68763	4.96885	4.80259	4.24378	3.16484	3.38696	3.21314	29.1321	29.0179	24.1429	23.0431	21.4112	20.6214	245.461	235.13	206.223	201.391	205.152	158.664	145.094	150.213	152.556	155.209	157.356	158.674	159.412	155.149	54.8894	-8.66789	-45.9093	-19.959	50.3828	-23.9831	-78.8139	-35.0152	15.6365	3.61481
3783	O=C1NC(=S)/C(=C/c2ccccc2F)S1	7	11.561	69.7145	4.64987	6	5	1	1	1	161.239	1072	10.8042	5.47368	2	7.67807	4.67824	6.74561	4.16255	51.0476	37.9545	32.85	28.7576	23.7895	11.2222	297.713	245.355	251.011	251.989	178.524	156.779	142.328	144.269	151.186	159.078	154.79	154.925	165.348	170.924	5.66163	-20.7322	2.2323	-30.6319	-1.21542	9.39229	-1.17511	-6.91308	0.941043	-3.00454
1414	CC1(C)CC(=O)C2=C(C1)Nc1nc(N/N=C\c3ccc(Cl)cc3)[nH]c(=O)c1C2c1ccc([N+](=O)[O-])cc1	17	29.5326	2147.84	8.98055	18	11	6	4	1	357.734	1798	9.39342	4.71866	5.44283	5.96224	3.77415	3.34315	3.53345	29.9667	28.3438	21.5497	17.7027	17.8333	19.8768	242.596	221.671	203.715	203.895	180.656	162.119	148.199	150.802	153.806	163.429	161.896	158.801	164.997	160.97	73.9544	38.0455	38.0901	136.524	-141.633	-57.6515	-118.736	37.6743	11	-6.625
892	O=C1N(c2ccccc2)C(=O)C(c2ccccc2)(c2ccccc2)N1CNc1nc2ccccc2s1	20	28.7615	890.64	8.07287	27	7	4	2	0	245.705	1646	8.31801	4.1982	3.95906	4.23629	3.48097	2.89758	2.60775	28.3793	28.7778	22.8406	23.0667	18.7838	18.5497	258.08	231.357	226.847	211.856	197.526	156.352	143.067	148.045	152.526	155.498	155.526	155.944	156.414	155.104	44.6097	33.3029	82.7326	-11.8807	-150.751	-145.973	-18.2257	51.9254	16.5933	10.2105
4085	COc1ccc(-c2cn3nc(-c4ccc(NCc5ccc(F)cc5F)c([N+](=O)[O-])c4)sc3n2)cc1	4	27.7721	814.221	7.95499	26	11	5	3	2	382.503	1736	11.6624	8.84337	8.25794	7.35584	4.04509	4.50733	5.98585	33.3846	31.9286	25.8091	22.906	27.6506	26.2738	259.797	237.826	196.296	213.223	239.328	163.724	147.961	152.166	156.401	161.98	163.089	162.844	158.828	162.635	54.429	-10.7628	-69.098	-22.0449	29.4921	-20.5059	8.10996	-5.16634	9.10059	-3.50481
3241	N#CSc1c(-c2ccc([N+](=O)[O-])cc2)nc2sc(Cc3noc4ccccc34)nn12	10	23.9773	358.952	6.9818	23	11	6	3	0	271.368	1692	12.4722	9.17816	9.03846	6.7842	3.49606	4.42848	4.3544	42.3	37.6591	31.012	30.7294	33.4828	36.5192	291.507	260.485	250.199	262.335	260.114	157.418	145.931	146.816	152.558	157.585	157.942	153.514	156.655	155.989	36.7933	6.14722	-26.4869	-97.3597	-25.3069	56.5069	5.35611	-36.6978	6.11	-0.425
3071	N#C/C(=N\Nc1ccc(Br)cc1)c1nc2cc(Cl)ccc2o1	10	17.1085	306.479	6.51361	15	7	4	1	2	137.139	2322	10.6224	6.94967	5.28783	4.5713	4.41447	4.54155	3.46627	77.4	38.125	33.4915	29.6415	32.6154	35.9429	299.948	244.77	249.84	272.617	247.937	157.313	145.621	147.939	157.284	163.617	160.131	152.498	162.021	158.361	21.0745	5.85945	30.2367	24.5701	-6.37543	-31.2396	-79.5361	-62.2175	1.90222	-4.66222
2219	CCOC(=O)C1=C(C)NC(=S)NC1c1ccc(OCCCCOc2ccc(C3NC(=S)NC(C)=C3C(=O)OCC)cc2OC)c(OC)c1	13	36.3144	539.885	7.85997	12	14	4	8	0	345.805	2486	7.54321	2.79004	2.41995	3.84228	2.73326	2.49699	2.49089	27.6222	26.1075	20.9548	21.0179	14.669	14.4724	217.811	206.575	183.949	179.375	147.099	162.453	147.549	156.573	156.403	155.99	159.01	157.098	163.605	163.341	146.547	81.3827	8.33059	-154.442	-303.922	-93.7339	124.55	52.6118	26.88	16.72
2070	CCCCCNC(=O)NNc1cc(C(F)(F)F)nc2c(C(F)(F)F)cccc12	14	21.3245	2139.46	8.69793	10	11	4	1	6	527.542	1376	12.6957	10.1319	6.43478	11.4683	5.92168	11.451	6.78502	29.913	28.1702	20.7981	21.2243	25.967	20.5507	217.635	186.888	182.52	175.705	164.158	181.212	155.645	169.345	167.756	174.349	174.447	180.821	195.194	177.537	80.6673	234.153	185.051	90.9225	112.484	28.1191	48.3762	-33.1304	4.42533	8.18147
2630	O=C(Nc1ccccc1)C1=C2c3ccccc3S(=O)(=O)N2CC1	12	18.4866	472.909	6.99181	12	6	2	3	0	228.522	1172	9.03904	3.51515	3.49123	6.17626	4.71561	2.91105	2.91131	31.6757	34.425	23.9213	22.2386	16.9545	17.9123	253.177	222.852	196.392	189.401	179.918	157.581	142.528	148.703	152.893	157.888	158.942	157.307	159.109	156.132	2.58802	43.071	22.6999	-51.8205	-106.567	6.08766	-13.484	17.3225	8.46457	4.82031
76	COc1ccc(C2=NOC(Cc3ccc4c(c3)OCO4)CC2)cc1	31.83	19.011	202.913	6.18825	12	5	1	4	0	136.444	1008	8.23256	4.12857	3.51613	3.17313	2.40509	2.6369	2.62724	23.4419	26	17.6939	15	15.9571	15.4032	226.658	196.828	153.946	157.289	166.995	159.897	144.057	152.036	155.211	157.981	160.93	161.529	160.68	160.353	59	-12	-81	-73	2	21	13	-40	7.90211	-3.7112
3031	O=C1CCCC2=C1C(c1ccc(Cl)cc1)c1ccc3ccccc3c1N2	10	21.1085	217.779	6.33899	16	3	1	1	1	148.589	1248	6.99102	2.52957	1.70627	3.37701	2.65021	2.36987	2.17702	28.3636	26.6458	19.9487	18.3984	15.3065	15.495	256.002	225.493	210.878	203.529	174.484	154.765	140.085	143.312	150.507	152.531	152.24	151.354	155.536	160.345	38.7476	9.9898	-3.47373	-32.6492	-53.9449	-80.6542	-32.1225	15.3104	9.97934	2.52066
4230	O=C(CC(Nc1ccccc1)c1ccccc1)c1cc2ccccc2oc1=O	1	21.9773	342.513	6.86593	22	4	1	3	0	218.972	1124	8.17021	4.69091	4.26667	4.65898	3.5654	3.47778	3.2709	23.9149	25.82	18.4324	17.3717	17.5909	16.4952	247.819	206.419	194.804	203.537	200.091	155.832	141.288	145.024	153.457	156.715	156.024	154.345	153.591	155.339	34.2404	1.18742	-4.85061	11.6075	8.97918	-10.8669	-34.9733	-31.9909	5.93164	-4.72657
1289	Cc1ccc(C2=NOC(CCl)CC2)cc1C	17.63	12.1587	78.9158	4.83839	6	3	1	1	1	78.6997	886	5.48765	0.925926	0.439153	2.45937	2.16959	2.03567	1.626	27.6875	24.6061	18.0685	14.2078	13.6222	11.3571	217.71	189.242	133.215	164.116	146.034	161.621	144.219	152.59	156.345	160.622	164.968	159.153	162.057	167.169	52.4375	13.9843	-56.0636	-38.8983	11.6654	-37.2147	-41.0009	-6.04581	7.37891	-4.01953
4161	Cc1nn2c(-c3nc4ccc([N+](=O)[O-])cc4[nH]3)c(-c3ccc(F)cc3)nc2s1	3	22.7819	290.303	6.70055	23	10	6	2	1	288.226	1418	12.5755	6.84889	6.33333	7.3904	4.2493	3.5107	3.83367	36.359	34.186	27.5802	25.939	25.5333	24.3288	272.608	249.419	248.284	256.024	238.855	163.221	149.552	151.724	158.544	163.691	160.525	157.292	159.643	156.658	48.6069	33.6808	-26.8012	-81.8261	-53.1012	-54.0934	-63.8227	36.1587	7.63905	2.4142
2638	COc1ccc(Cl)c(-c2nnc3n2NC(c2cccn2C)S3)c1	11.9	18.3609	181.74	6.03549	16	8	5	1	1	111.175	1408	8.48782	3.63169	3.2104	3.00474	2.72189	2.71512	2.57079	38.0541	32.625	28.3467	25.7531	23.2593	21.4681	251.936	236.351	190.061	206.964	204.832	162.376	150.018	157.13	155.199	159.201	165.548	162.853	163.881	160.94	54.6719	3.11521	-38.5178	7.47538	63.7528	-25.9649	-103.679	-91.3205	11.9511	3.07816
1789	O=c1[nH]c(=S)[nH]c2nc3c(c(-c4ccccc4)c12)CCC/C3=C\c1ccccc1	15	23.2702	389.028	7.02836	22	5	3	1	0	169.708	1350	7.59259	2.81532	2.33607	3.53559	2.84885	2.51783	2.24752	28.125	27.1538	20.2605	21.4034	16.1284	14.582	256.211	224.02	235.906	207.084	176.567	155.896	142.696	145.809	151.207	153.095	149.265	155.199	158.294	159.323	47.2901	37.3086	51.7747	6.64506	-72.8704	-135.062	-70.7284	8.41358	9.7934	6.45486
4120	C/C(=N\N=C1\N=C(c2cc3ccccc3oc2=O)CS1)c1[nH]c(-c2ccccc2)nc1C	4	25.5414	360.704	7.05121	21	8	5	2	0	203.726	1512	9.02832	4.44803	3.92115	3.99462	3.04526	2.8789	2.46303	29.6471	29.6	23.2	22.0917	21.5269	17.086	254.924	228.704	199.98	208.759	201.46	158.646	144.676	149.443	155.25	160.363	160.444	158.059	156.542	161.755	82.5387	58.5931	-56.7953	-87.2436	-62.9102	-20.312	3.18557	66.6039	12.6371	0.480969
2281	CCOC(=O)C1C(c2ccsc2)N(N=O)C(c2ccsc2)C(C(=O)OCC)S1(=O)=O	13	22.7173	309.373	6.83316	10	12	2	7	0	358.167	1982	9.34667	2.43836	1.31955	7.16335	5.89526	3.42068	3.02422	39.64	37.1731	26.8099	31.5556	19.1096	19.3139	240.733	210.635	231.145	198.836	179.212	160.466	143.773	151.381	157.462	159.043	155.125	159.891	159.241	160.952	47.0421	70.6448	-52.5643	123.797	78.9033	-140.539	-273.951	-195.649	15.2448	15.4208
2864	CSc1nc(-c2ccc(N(C)C)cc2)c(C#N)c(=O)n1C	10.63	15.7513	139.5	5.68001	12	6	4	1	0	173.337	1072	7.7958	3.29932	2.09697	4.68478	3.13203	3.37163	2.75084	28.973	28.2632	25.4085	20.3146	18.8163	13.8364	233.419	245.936	184.461	161.415	195.252	162.117	146.776	159.157	149.74	160.555	155.429	164.65	155.322	166.397	78.888	62.6855	2.87355	-22.2416	-9.72364	-47.5702	-66.4041	-38.6467	15.6567	2.61432
372	Cc1cccc2c(/C=N/Nc3cc(C(F)(F)F)nc4c(C(F)(F)F)cccc34)c[nH]c12	24	24.7387	426.367	7.1867	19	10	4	0	6	496.625	1452	14.0889	11.6463	7.50794	11.0361	5.9429	11.8493	4.30996	32.2667	30.5625	25.8646	23.2844	28.2195	23.0794	252.546	242.118	192.201	192.809	195.718	175.951	151.37	162.862	158.235	169.212	170.436	177.607	191.184	162.73	51.7467	116.156	19.8267	-15.4489	84.6578	69.2	50.1644	-61.4533	4.89481	1.66173
2505	Cc1ccc(C(=O)n2cc(C)n(-c3ccccc3Cl)c2=S)cc1	12	17.9415	185.221	6.05446	17	5	2	1	1	138.936	1370	7.42235	3.03761	2.58788	3.6562	2.84192	2.92035	2.58339	36.0526	29.1	26.6914	24.5618	19.0769	18.2545	260.351	241.981	227.738	203.265	188.372	156.302	143.088	149.741	151.001	156.912	152.678	154.011	157.721	153.599	55.0209	28.5096	-22.4172	-23.9724	-27.5583	-49.8106	-49.1685	-25.1151	11.6413	0.688366
2570	Cc1c(C(N)=O)sc2nc(SCC(=O)Nc3ccccc3)n(-c3ccccc3)c(=O)c12	12	24.2651	1374.13	8.35698	21	9	4	3	0	275.118	1710	8.95692	4.91749	5.05782	5.61465	3.96745	3.50083	3.38083	34.898	31.9038	28.835	28.9815	25.2178	20.6327	259.038	240.495	224.368	221.763	216.403	157.836	144.9	148.05	153.053	154.665	158.284	154.753	152.285	155.863	52.1242	26.7182	-42.1407	3.84108	-98.3952	1.3486	-13.4948	25.6077	12.3432	5.50729
960	Cc1nn(-c2ccccc2)c2c1cnc1c(C(=O)Nc3ccc4c(c3)C(=O)c3ccccc3C4=O)c(Nc3ccccc3)nn12	19	36.6005	1108.61	8.51494	36	10	7	3	0	337.944	1818	10.0588	6.55172	6.41566	4.96977	3.62639	3.64911	3.58233	26.7353	28.6133	24.0253	23.5298	20.8448	20.7048	263.094	242.046	231.279	234.769	215.133	157.734	145.268	148.089	154.68	159.114	158.813	155.455	158.822	158.051	79.75	66.25	60	20	-121.25	-134	-62.5	-30	18.4903	7.5811
4232	COc1ccc(C2CC(=NO)CC(c3ccc(OC)cc3)N2C)cc1	1	19.0395	210.273	6.2647	12	5	2	3	0	163.444	1034	6.69388	2.94643	2.74747	3.3356	2.4854	2.87103	2.67845	21.102	23.7255	17.7857	14.1	13.9464	12.8384	211.268	205.767	149.956	151.815	155.355	162.301	146.181	155.27	153.807	157.161	161.122	162.139	161.78	164.931	57.3061	-38.9592	-94	-52.4286	63.9592	7.89796	-47.1429	-19.9184	14.5985	-2.64556
1549	COc1ccc(NC(=O)CSc2nc(-c3ccco3)c(C#N)c(=O)[nH]2)cc1	16	20.6036	772.108	7.64238	17	9	4	4	0	257.142	1370	10.6938	6.31111	6.42857	6.27176	3.82099	4.61908	4.2786	33.4146	31.7209	26.7468	26.3544	22.1833	22.5536	255.953	231.361	208.304	196.969	197.063	160.128	146.671	151.831	156.255	158.033	158.449	160.112	161.328	161.378	46.2534	0.62985	-59.7785	27.8475	38.1606	-33.6647	10.3452	-9.19691	7.28971	-0.954789
1217	COc1ccccc1NC(=O)Nc1c(-c2cccc(F)c2)nc2ccccc2c1O	18	23.4201	468.862	7.24892	22	7	3	3	1	280.528	1266	9.83333	6.03704	5.9604	5.84433	3.87463	4.28086	4.41474	26.375	27.4902	22.6505	21.6636	19.7222	19.7426	247.012	227.733	207.442	198.161	199.692	161.217	146.241	150	156.391	158.862	161.164	160.194	160.833	160.469	42.7969	12.2656	-15.6406	-36.4531	9.34375	-11.6094	-16.5625	-1.54688	11.1875	1.8125
2753	Cc1[nH]nc2c1C(c1cccc(Oc3ccccc3)c1)C(C#N)=C(N)O2	11	20.4822	497.679	7.16547	17	6	4	2	0	178	1060	9.09524	4.05263	3.53425	4.2381	3.54306	3.22632	2.54795	25.2381	27.2889	21.5761	19.9307	14.9368	13.589	246.993	229.235	217.137	196.904	160.864	159.772	146.637	148.353	152.833	157.339	155.407	157.741	163.826	162.518	52.5306	26.9592	-29.4898	-25.6122	-71.0612	-72.551	40.1837	17.6735	11.5034	2.75737
4229	COC1=Cc2cc(OC)c(OC)c3ccc(-c4ccccc4)c(c23)C1=O	1	20.2515	232.981	6.40647	16	4	0	4	0	179.528	1066	8.81818	3.09649	2.01124	4.08018	3.20051	2.86623	2.89888	24.2273	26.2979	24.5165	22.3491	14.2807	13.0112	244.146	264.648	210.761	190.927	162.311	155.905	140.832	149.037	145.025	146.621	152.314	153.026	157.977	159.933	68.7376	27.9504	46.2831	-37.3926	-109.822	-39.5145	-32.5165	-158.254	20.2231	15.1653
2501	O=C1N/C(=N\c2ccc(F)c(Cl)c2)S/C1=C\c1ccccc1Cl	12	17.9939	152.431	5.85962	12	7	2	1	3	195.514	1662	10.2392	5.94949	6.20915	6.10981	3.84525	4.15259	4.0676	51.9375	37.0882	33.3077	31.2679	29.5682	28.2353	298.15	249.632	264.708	257.567	225.094	157.753	142.766	145.843	155.154	157.666	152.862	153.295	160.021	161.295	13.0857	-17.9334	-32.9382	-10.316	53.1791	-8.3464	-41.3536	-24.7854	1.54883	-6.14355
1743	Cn1c(NN)nc(-c2ccccc2Cl)c(C#N)c1=O	15.36	14.2277	105.124	5.297	12	7	5	1	1	174.978	1040	9.84845	2.49051	0.342857	6.03371	4.47931	4.23382	2.54938	35.8621	30.5333	28.7931	27.2459	19.4634	8.71429	252.758	248.671	219.688	189.408	168.087	164.846	152.965	158.035	156.183	165.365	159.172	167.009	166.827	172.167	37.0385	37.9634	20.7131	-41.1693	-32.7124	-93.7053	-84.8019	10.3775	10.5589	2.68014
1249	C=C(C)[C@H]1CC[C@@]23CC(CC[C@H]2[C@]1(C)CCC(=O)O)C(C)C3=O	18	18.1252	222.579	6.23819	0	3	0	3	0	219.319	942	4.67925	1.52288	1.24107	4.1381	2.15362	2.91957	3.6994	17.7736	20.3273	14.2012	10.9031	9.88889	7.76786	189.661	182.566	127.027	106.569	114.916	163.015	143.186	149.932	152.554	158.377	161.278	168.125	166.124	173.79	58.5376	16.9195	-89.8782	-101.251	14.9217	63.602	11.4251	-55.1232	20.3115	1.26913
236	FC(F)C(F)(F)Oc1cccc(/C=N/Nc2cc(C(F)(F)F)nc3c(C(F)(F)F)cccc23)c1	26	26.6398	1801.78	8.72031	16	14	3	1	10	749.41	1752	18.7111	12.2809	8.43284	16.6535	7.19184	12.576	5.65755	38.9333	34.1277	30.7527	27.4845	29.6404	24.194	256.201	238.252	222.126	205.641	194.498	187.215	154.731	172.981	170.501	172.013	175.438	181.577	195.017	172.773	29.8395	82.6296	74.2593	-3.28395	-54.0123	-61.5926	-53.8642	-42.2099	-4.50716	-2.0237
1556	O=C(/C=C/c1ccc(F)cc1)c1ccc(Nc2cc(=O)oc3ccccc23)cc1	16	22.8343	880.208	7.84487	22	5	1	3	1	281.5	1202	10.0444	5.025	5.19178	6.25556	3.74118	3.64236	3.80441	26.7111	27.6458	20.59	18.3434	18.2	17.1233	260.695	223.172	202.785	208.898	205.826	157.175	141.692	144.514	153.731	156.341	154.925	154.372	154.559	155.687	31.7037	-12.321	-57.358	-37.7778	3.95062	-24.2099	-61.0864	35.4198	4.14815	-7.46914
1077	O=C(CN1CCN(c2cc3c(cc2F)c(=O)c(C(=O)O)cn3C2CC2)CC1)N/N=C/c1ccc(F)cc1	19	29.3242	15019.2	10.9254	16	11	5	4	2	440.556	1624	9.93548	4.17986	3.57353	7.10573	3.86202	4.20424	3.15768	26.1935	27.1515	20.1667	18.5	17.1871	15.0368	229.432	203.799	174.059	172.802	173.057	166.528	149.063	157.559	162.273	161.062	165.031	168.008	165.893	164.089	70.0791	8.26639	1.03018	41.307	-23.666	-144.491	-155.671	-39.666	9.97815	-7.40765
1097	Cc1cccc2c3nn4cnnc4sc-3cc12	18.3	14.0493	94.1152	5.07515	16	5	4	0	0	80.0868	892	9.69778	3.56522	1.33333	3.20347	2.59086	2.91304	2.86667	35.68	33.7143	30.2353	22.1961	16.2609	10.8667	276.036	264.183	192.981	189.35	171.911	158.127	146.207	149.836	149.405	151.873	158.85	161.393	167.502	174.454	38.155	14.2496	-18.4491	-2.9824	3.2896	3.8832	-47.0663	-37.2693	7.8992	1.6544
3665	CC(=O)N(C(C)=O)c1nc(-c2nnc(S)n2-c2ccc(Oc3ccccc3)cc2)cs1	8	24.3055	531.741	7.40756	22	10	5	3	0	237.225	1722	9.78652	6.07024	6.65741	4.94219	2.74507	3.19036	3.74306	35.875	32.098	27.1053	30.051	22.931	26.2361	260.033	236.697	225.62	195.951	193.655	159.031	145.7	152.175	158.356	154.547	154.63	157.047	160.152	162.814	84.9342	37.0352	-92.5597	-71.1244	-71.2925	36.0408	111.856	-28.784	12.5951	3.85807
3766	COC(=O)C1=C(C)NC(C)=C(C(=O)OC)C1c1c[nH]nc1-c1cc(Cl)sc1Cl	7	21.4651	206.751	6.36113	10	10	3	4	2	221.375	1902	9.10343	2.46759	1.76646	4.91945	4.02039	3.03305	3.04137	42.2667	32.8723	29.5747	28.487	19.4792	28.0093	252.266	265.63	220.21	189.788	165.656	161.002	146.922	154.301	149.797	155.705	155.772	160.732	165.605	165.115	73.9806	55.03	-35.6971	-62.7618	-78.4158	68.438	-174.435	-192.591	18.9225	13.4598
3553	Nc1[nH]nc2nc(-c3ccc(Cl)cc3)cc(-c3c(-c4ccccc4)[nH]c4ccccc34)c12	8	26.0178	380.584	7.10486	30	6	5	0	1	155.644	1488	8.1921	4.64815	3.35886	3.11288	2.9786	2.92147	2.74565	29.76	28.4545	22.7018	21.2583	19.6733	16.7703	265.83	243.704	243.009	243.24	215.317	156.991	145.225	145.306	151.405	153.256	152.15	151.236	155.014	160.728	39.1619	21.8519	15.7704	-1.94904	-12.1384	-32.2203	-141.111	-109.778	12.648	3.5984
541	Cn1c(=O)c2cc3n(c2n(C)c1=O)CC1C3Nc2ccc(Cl)cc2C1(C)C	23	22.217	208.218	6.33184	15	7	4	2	1	200.651	1354	7.7001	3.3	3.18902	4.18023	2.42976	2.58832	3.07332	28.2083	26.9038	22.0385	16.9167	16.48	16.8161	229.856	226.743	163.071	146.647	170.512	162.566	147.472	156.114	152.068	161.329	160.616	165.767	163.964	159.757	93.0402	73.3194	-51.7899	-112.004	-50.8045	-8.52876	-9.74066	-13.5835	22.2517	1.89583
3035	COc1ccc2nc(C)cc(-n3cc(CN4CCC(N5CCOCC5)CC4)nn3)c2c1	10	24.6964	744.873	7.74462	15	8	6	2	0	160.194	1280	6.72131	2.74016	2.84158	2.62614	2.27744	2.28478	2.28603	20.9836	24.3077	16.1046	13.8161	13.0945	15.0099	206.001	182.794	149.959	139.7	145.544	165.609	149.416	160.152	161.691	161.602	163.882	169.184	170.006	160.869	92.8237	-5.16286	-45.4974	58.9213	90.957	-34.4362	-75.6302	-74.1072	13.9301	0.183553
1372	CC(C)CC1=NNC(=O)C1Sc1ccc(Cl)cc1	17	13.7917	111.143	5.29861	6	5	2	1	1	122.398	1190	6.12271	1.89495	0.930556	3.70902	3.01849	2.93027	2.21821	36.0606	29.3529	23.4324	16.4667	14.8545	20.05	235.629	193.093	202.656	165.402	152.741	160.773	145.121	150.584	156.066	161.859	158.039	161.77	165.161	158.367	36.0665	12.4683	0.832047	51.459	-35.0732	-55.3877	-68.3379	-30.6153	5.3067	-1.75298
3689	C#CCn1cc(C(=O)OCC)c(=O)c2ccc(C(F)(F)F)cc21	8	17.4023	178.607	6.0181	10	7	1	3	3	383.229	1072	13.2	6.89552	4.76087	10.9494	5.51807	8.22388	5.21467	30.6286	29.3333	25.2778	24.0375	20.5522	16.7174	244.94	237.419	216.957	198.993	169.268	169.314	147.375	161.664	155.568	164.326	160.576	162.5	177.148	162.817	56.8947	96.0531	9.90367	-81.9102	-63.2212	-77.6302	-73.4841	46.6702	7.65306	5.7551
303	Cc1cccc(OCc2ccccc2-c2nc(CN3CCN(C(c4ccccc4)c4ccc(Cl)cc4)CC3)cs2)c1	25	32.5435	641.591	7.87494	29	6	3	1	1	181.759	2050	6.02733	2.35797	2.65439	2.42345	2.13132	1.93558	2.06862	27.3333	26.475	18.4862	16.2919	14.7149	16.7348	239.027	204.611	187.709	183.335	163.173	157.596	142.321	150.654	153.602	156.601	156.96	153.982	158.941	158.704	57.7394	-49.494	-41.0095	1.12773	-67.8914	-35.1639	18.8166	-14.7206	12.552	-6.3888
3175	O=C(Nc1ccc(S(=O)(=O)Nc2cccc(Cl)c2)cc1)c1cn(CCO)c2c(cc(Cl)c3ncccc32)c1=O	10	30.7759	3013.48	9.37183	26	12	4	5	2	371.06	2342	9.65516	4.85372	4.96919	6.28915	4.095	4.17168	4.09295	39.6949	35.0476	27.3597	26.8288	22.482	22.0084	266.382	239.341	223.35	212.781	194.35	158.266	144.301	149.199	154.272	156.904	155.033	156.782	160.103	159.931	9.78026	28.1332	24.8594	-5.78551	-87.809	-85.1176	-69.703	26.8504	9.47055	1.16662
2640	COc1ccc([C@@H]2[C@H](Oc3ccc(Cl)cc3Cl)C(=O)N2c2sc3c(c2C#N)C=C(/C=C/c2c(C)nn(-c4ccccc4)c2Cl)CC3(C)C)cc1	11.9	39.835	2925.34	9.5906	28	11	4	3	3	294.637	2946	7.94147	4.71309	4.15221	3.6375	3.18049	3.09546	2.85271	36.3704	30.2874	27.0372	23.4796	22.5378	23.865	261.875	244.551	222.433	224.126	222.871	156.673	142.068	148.209	150.18	154.552	152.806	153.802	153.54	153.977	110.735	22.4778	-31.6526	45.1521	-11.4792	-46.0607	-107.476	-93.5976	25.3054	-0.34385
471	CCN(CC)c1cccc(OCc2cc(=O)oc3ccc(Br)cc23)c1	23	19.1893	336.678	6.73542	16	5	1	3	1	164.828	2206	7.35705	3.56446	3.68741	3.66285	2.41428	2.64916	2.59383	49.0222	28.5957	22.39	20.6154	20.6456	20.1067	237.509	208.943	163.973	158.921	183.966	158.698	143.308	152.605	156.19	152.509	159.298	161.217	157.262	157.265	69.3527	43.0793	-10.0181	-19.7318	25.9982	18.1434	-0.290443	23.5342	10.8084	3.71358
3198	O=C(/C=C/c1ccc(Cl)cc1)c1ccc(Nc2cc(=O)oc3ccccc23)cc1	10	22.8343	880.208	7.84487	22	5	1	3	1	219.311	1410	8.969	4.71389	4.33942	4.87357	3.50632	3.42055	3.0144	31.3333	28.6458	21.71	18.9899	18.9	18.6575	267.96	227.955	204.83	211.711	208.815	154.167	140.647	143.194	151.516	154.61	154.38	153.069	153.174	154.169	29.18	-9.76177	-31.7709	-19.5229	-3.00154	-14.2885	-56.5917	-1.9467	4.14815	-7.46914
1047	O=C(c1cc(-c2ccc(Cl)cc2)n(-c2ccc(F)cc2)n1)N1CCNCC1	19	21.3392	245.696	6.49735	17	7	4	1	2	220.505	1368	8.569	4.65063	3.56019	4.90012	3.35783	3.34458	3.01346	30.4	28.0417	20.1111	18.9048	21.2474	18.8229	242.234	199.69	207.837	214.606	206.258	163.701	147.897	155.178	162.195	162.092	159.729	157.762	159.281	156.713	50.2593	20.5101	11.1489	-14.5711	-21.8317	-53.9497	-82.3856	-77.5318	7.01333	-1.70222
3710	C[C@@H]([C@H]1CC[C@H]2[C@@H]3CC[C@H]4C[C@@H](N(C)C(=O)CCc5ccccc5)CC[C@]4(C)[C@H]3CC[C@]12C)N(C)C	7.5	28.66	3709.05	9.49946	6	3	2	1	0	198.875	1402	3.5	0.987539	0.964912	2.25994	1.6573	1.7015	1.71491	15.9318	19.5652	13.0144	10.0106	8.4891	8.50526	185.175	174.264	116.978	116.482	120.204	163.726	144.368	153.602	154.536	158.968	164.943	165.615	164.623	164.48	81.2149	-15.2149	-123.066	-77.8843	52.2645	48.8264	22.6529	-6.55372	28.5	-7.25
4457	CC(C)c1cc(C(C)C)c(S(=O)(=O)ON2C(=O)CC2CBr)c(C(C)C)c1	0	19.8308	170.537	6.09446	6	7	1	4	1	249.989	2498	5.87985	1.19309	0.540811	4.62942	3.34499	2.28816	2.11895	46.2593	30.8	22.75	22.9139	12.4688	10.4692	209.745	193.362	186.123	169.129	136.551	162.717	144.023	154.692	155.593	156.284	156.308	159.513	161.361	171.78	64.0098	135.397	69.4419	64.0736	-98.8804	-372.312	35.055	-30.988	18.0096	7.59945
253	O=C(O)C[C@@H]1NC(=O)[C@@H]2CCCN2C1=O	26	11.5895	81.9743	4.81187	0	6	2	4	0	226.139	690	9.48148	1.76	0	8.37551	4.74324	4.1	4.46154	25.5556	26.0357	16.4595	17.0448	11.68	6.07692	205.068	162.039	140.228	121.698	108.884	167.572	151.188	158.216	166.229	167.755	170.378	168.43	172.31	180.19	30.4294	16.2154	-48.0796	-56.3073	-20.7695	71.4417	-33.9698	-43.1221	3.95199	-1.71879
1717	CCOC(=O)c1c(C(F)(F)F)c2cccnn2c1C(=O)c1ccc(F)cc1	16	20.9259	294.825	6.67964	15	9	2	3	4	449.285	1274	14.5128	5.05376	4.31034	11.5201	7.58653	5.40591	5.22701	32.6667	30.9024	26.7778	31.1325	20.8925	16.7471	252.315	241.102	242.059	232.827	193.943	171.65	148.617	159.994	160.671	163.657	168.731	164.256	169.508	176.16	63.4885	111.968	50.5404	10.5417	18.0815	-145.456	-325.298	-178.917	8.39185	15.6818
3106	Cc1c(CCCNC(=O)CCc2c[nH]c3ccc(Cl)cc23)c2cc(OC(F)(F)F)ccc2n1C	10	26.7942	4152.37	9.55521	18	9	3	2	4	373.151	1732	9.11195	4.26443	3.28015	6.3246	2.88307	3.22548	3.85653	29.3559	27.129	19.2206	17.1242	16.6744	18.6325	229.879	207.137	156.274	147.781	157.619	167.394	147.961	158.424	156.259	157.54	164.283	166.593	168.699	168.776	91.5335	131.697	-96.5767	-109.577	59.2938	136.657	82.9013	-132.518	10.3959	3.47343
4192	Fc1ccc2nc(NC3OCCc4ccccc43)sc2c1	3	16.9586	125.951	5.57783	15	5	2	1	1	155.865	1088	8.89542	4.70833	4.88095	4.58425	2.55572	2.73958	3.39109	32	30.5135	21.8101	21.7237	20.5625	18.9762	254.624	212.105	176.83	194.264	215.135	160.337	143.996	149.86	156.349	158.75	163.166	159.63	155.555	151.659	22.8474	-22.0419	-31.0281	-35.4506	50.3268	36.2511	-24.1807	-35.3199	4.2154	-0.506055
4488	COc1cc(-c2nc3sc4c(c3c(=O)n2C(Cc2cc3ccccc3[nH]2)C(=O)O)CCCC4)cc(OC)c1OC	0	31.6627	650.302	7.86373	24	10	3	6	0	311.337	1896	8.55717	5.4127	5.28293	4.51213	3.52517	3.31602	3.65587	27.4783	27.9324	22.9876	22.1813	21.619	21.761	235.246	225.111	204.717	208.711	198.252	159.713	144.589	152.004	153.426	155.294	158.522	155.834	159.095	155.391	102.557	67.2696	58.4563	-25.4799	-75.8201	-39.3947	36.4163	-46.2072	24.7125	15.8828
1904	Oc1ccc(-c2ccccc2)cc1CNC12CC3CC(CC(C3)C1)C2	15	20.5346	687.991	7.45007	12	2	1	1	0	135.007	968	4.76923	2.50435	2.05556	2.59629	2.13347	2.45435	2.28549	18.6154	22.0179	13.0926	9.60556	13.1739	12.4444	212.305	171.438	143.814	162.046	163.169	159.726	142.646	147.274	155.005	163.485	162.342	157.717	158.748	157.727	33.2367	-14.497	-23.2604	28.1124	36.0118	29.7515	-37.8107	-61.7633	7.57249	-10.483
3500	CC(=O)OCC1=C(C(=O)O)N2C(=O)[C@@H](NS(=O)(=O)c3ccc(NC(=O)NCc4ccccc4)cc3)C2SC1	8	29.6209	12017.4	10.7291	12	14	4	8	0	464.831	2108	9.78853	5.08718	6.28696	7.49727	4.15025	4.25876	6.23806	34	33.8	24.6978	24.1935	23.3385	23.3652	238.844	214.167	185.673	193.375	190.347	161.683	146.797	153.275	155.892	160.597	162.928	160.481	161.43	159.171	29.4675	40.0212	-76.2434	-44.7706	-8.00728	11.1378	-21.7533	37.1926	9.38189	-4.39334
3552	COc1cc2nc(Sc3nnc(N)s3)n(-c3ccc(Cl)cc3)c(=O)c2cc1OC	8	22.7129	280.28	6.7005	21	11	5	3	1	196.929	1900	10.1045	5.48457	5.05423	4.57974	3.57561	3.39057	3.45651	44.186	36.1957	33.5062	31.9101	30.8438	27.0595	270.273	271.148	235.297	245.271	226.82	159.686	147.412	153.072	151.784	154.044	155.953	153.422	159.142	157.314	55.1719	10.4746	-2.19801	-40.5674	16.5381	-4.76149	-55.163	-99.5694	13.7085	7.38724
3999	Cc1ccc2[nH]c(-c3ccccc3)c(-c3cc(-c4ccccc4)nc4[nH]nc(N)c34)c2c1	5	26.0178	367.983	7.07119	30	5	5	0	0	160.833	1238	7.73585	4.42683	3.09091	3.03459	2.92218	2.82995	2.74343	23.3585	26.1552	20.5833	19.3435	18.0305	15.1818	251.024	236.441	233.195	236.604	209.296	157.791	145.302	146.399	150.784	153.756	152.817	151.633	154.965	158.976	56.9886	37.9156	10.8398	20.0185	2.01317	-47.0157	-134.993	-160.565	16.1588	6.45069
939	O=S(=O)(Cc1nnc(CS(=O)(=O)c2c[nH]cc2S(=O)(=O)c2ccc(Cl)cc2)o1)Nc1ccc(Cl)cc1	20	28.5242	1506.51	8.59848	22	16	4	7	2	423.409	2726	10.8181	5.57051	7.72742	8.14248	3.99933	4.46341	6.14799	52.4231	47.8	34.1345	34.8167	32.25	31.9551	274.114	232.843	219.449	214.607	209.098	159.538	143.693	149.193	156.045	159.365	159.858	158.509	163.242	162.664	-30.3353	47.3717	-111.923	54.0358	41.0302	9.66791	-128.516	68.1036	-0.350592	-7.67604
33	Cc1ccc(Nc2nnc(CSc3nnc(-c4ccncc4)n3-c3ccccc3)s2)cc1	35	25.4035	944.272	8.01357	28	9	7	0	0	155.562	1702	8.17429	4.40667	3.85149	3.05024	2.85211	2.54395	2.41676	33.3725	31.6909	25.6731	23.3364	22.84	20.4752	259.377	227.74	225.877	240.551	214.164	159.275	146.405	150.087	154.238	159.656	160.014	154.215	153.615	159.383	56.9629	4.00248	-23.8018	-30.1592	-23.4488	-38.0936	15.5796	54.2604	9.42138	-0.0434448
2565	O=c1cc(OCc2nc(-c3ccc(Cl)cc3)n[nH]2)c2ccccc2o1	12	19.8964	216.664	6.29464	21	7	3	3	1	172.033	1288	10.4758	6.46935	6.90544	4.64954	3.44907	3.54926	3.66496	34.8108	31.1	24.4935	22.5946	22.6207	22.7021	267.011	229.869	209.246	196.053	191.55	158.366	145.403	149.789	155.673	159.23	158.565	161.294	164.433	162.321	33.0644	-0.547962	-23.3437	-19.3707	-53.5578	-34.4849	54.4704	6.64272	3.67348	-2.85756
3252	Cn1c(C23CC4CC(CC(C4)C2)C3)nn(CNc2ccccc2)c1=S	10	20.5419	750.572	7.53713	11	5	4	0	0	105.91	1198	5.02832	1.70536	1.59794	2.07666	1.87486	1.8564	1.74446	23.4902	24.0364	15.6026	11.9828	14.8661	12.0825	212.717	175.007	162.957	151.519	156.273	162.667	146.763	153.406	156.16	167.456	162.408	166.169	162.595	160.959	58.8875	12.5934	-36.8725	-28.3165	-20.6109	-11.6776	-39.8705	13.0061	11.263	-4.08997
3889	COc1ccc(-c2nc3sc(-c4ccc(F)cc4)nn3c2-c2nc3ccc([N+](=O)[O-])cc3[nH]2)cc1	6	28.2889	505.483	7.47828	29	11	6	3	1	326.031	1702	11.8889	8.35125	7.76976	6.52062	3.8748	3.48892	3.72076	34.04	32.8364	27.4762	25.6727	27.5376	26.9072	270.271	252.083	234.046	250.358	259.462	161.03	147.467	150.446	155.354	160.06	159.932	158.495	154.905	154.115	53.4	8.64	-44.7556	-39.4444	38.5156	-16.5378	-54.6311	-39.5467	10.55	1.79
516	FC(F)(F)c1cc(N/N=C/c2c[nH]cn2)c2cccc(C(F)(F)F)c2n1	23	20.508	477.709	7.12451	15	11	5	0	6	480.292	1280	16.9143	13.7538	8.44444	13.7226	7.30058	14.3953	5.2463	36.5714	33.3243	27.942	27.7671	31.6	24.5111	254.61	237.122	223.454	212.526	193.675	184.106	157.111	171.798	165.757	176.039	175.991	181.467	199.44	171.679	21.8759	69.5918	27.4906	-17.7576	-3.04735	-27.0424	14.5388	-55.8776	-1.53061	1.22449
64	O=C(Nc1ncc(-c2ccc(Cl)cc2)[nH]1)c1[nH]ncc1-c1ccccc1	32	20.5631	206.796	6.28725	22	7	5	1	1	167.783	1296	9.04012	5.33871	5.34172	4.19458	3.5216	3.37678	3.39157	32.4	29.5349	22.25	21.6071	21.8871	20.8302	260.473	222.808	195.256	193.242	201.966	160.194	148.359	150.206	155.68	159.381	163.274	167.098	163.513	160.282	23.1115	-10.9348	-13.8723	35.1511	-5.40593	-30.7714	-20.0936	-34.6132	5.32	-5.08
3173	CC1=NN(c2ccc(S(=O)(=O)O)cc2)C(=O)C1/N=N/c1[nH]nc2nc3cc4ccccc4cc3cc12	10	29.3018	489.44	7.4742	23	12	7	4	0	335.688	1736	11.0273	7.33333	7.72826	6.33374	3.59846	4.04419	5.03804	32.7547	34.8621	25.5798	21.7177	24.3564	24.4783	261.479	238.769	208.567	217.127	207.628	160.651	146.942	150.821	156.798	161.281	160.35	160.146	164.572	163.563	29.0944	58.5701	-26.2732	-72.3087	-73.3815	4.90934	32.2934	22.126	8.91741	-5.49519
845	Cc1ccccc1OCc1ccccc1-c1nc(COc2ccc(Cl)cc2)cs1	20	22.7249	369.042	6.97562	23	5	1	2	1	138.453	1606	7.18468	3.79766	3.34593	2.82557	2.37296	2.43076	2.41527	32.7755	29.1923	22.2843	19.9252	20.8947	20.0206	256.386	220.417	195.802	203.968	213.627	155.083	140.36	146.707	151.322	154.473	155.263	153.598	151.005	154.835	42.2637	-26.3345	-54.0921	-42.6294	31.1271	15.3063	-19.3645	-20.9584	7.95918	-5.06122
323	O=C(COC1=C(Br)C(c2ccccc2)OC1=O)NCc1ccccc1	25	19.2583	953.412	7.77634	12	6	1	4	1	208.828	2230	8.8553	4.38167	4.44709	5.09337	4.96486	3.66439	3.29095	54.3902	30.8605	29.1573	25.8621	21.7966	21.125	252.596	207.802	193.132	204.992	190.828	157.57	143.19	149.311	154.808	158.119	159.819	159.031	158.21	158.52	28.135	-6.26263	6.65445	-5.0254	30.2233	-13.9536	-68.7615	-20.6189	4.56157	-3.674
1019	N#Cc1ccc(Nc2nc(Oc3ncnc4ccccc34)nc(N3CCC(Cc4ccccc4)CC3)n2)cc1C(F)(F)F	19	34.1945	620.835	7.88968	28	12	8	1	3	421.118	1840	10.4706	6.6	6.60667	6.19291	3.40643	3.63763	3.36787	27.0588	28.1233	20.0788	18.9441	20.5032	21.4467	244.12	207.81	188.737	198.441	196.909	166.759	148.08	157.837	157.757	166.021	168.612	165.633	167.034	161.631	86.2085	141.576	124.586	123.752	25.4204	-96.5035	20.6099	-7.01038	6.08153	-1.74567
2221	C[C@H]1CC[C@@H](C(C)(C)O)C[C@@H]2C1=CC(=O)[C@@H]2C	13	13.3095	80.4946	4.91882	0	2	0	2	0	149.979	692	4.14634	0.47191	0	3.65803	2.33333	2.72659	1.75	16.878	19.4762	13.1789	9.31646	5.83146	1.875	183.696	169.822	112.983	110.401	83.8971	163.679	143.867	151.567	155.038	160.842	165.778	165.917	169.237	184.951	45.4438	6.92683	-65.8049	-41.931	14.4551	-33.1214	-10.4545	27.5836	11.1172	-6.12195
3230	Oc1ccc(/C=N/n2c(C34CC5CC(CC(C5)C3)C4)nn(CN3CCN(c4ccccc4)CC3)c2=S)cc1	10	31.1081	2399.22	9.1179	17	8	6	1	0	193.215	1730	5.84384	2.87943	2.93728	2.61101	2.23744	2.09368	2.1096	23.3784	24.65	16.1227	13.0081	17.5319	16.3495	217.535	178.496	166.518	184.136	181.389	162.447	146.889	153.95	157.76	165.735	166.312	161.179	161.812	154.372	79.6564	2.11971	-9.18878	33.1092	-45.7321	-79.894	-110.008	-28.251	13.0095	-8.92476
2497	Cc1c(C(N)=O)sc2nc[nH]c(=O)c12	12	10.842	62.4817	4.47135	9	6	3	2	0	161.337	826	10.8783	0	0	7.6827	6.24667	3.69231	1	39.3333	34.5	34.7895	28.8718	5.76923	1	255.487	262.537	150.754	116.558	76.8187	162.892	151.112	153.716	151.236	152.73	172.316	175.763	184.023	184.918	26.3479	16.7231	-41.2542	-24.4565	-73.1539	51.0373	-28.5825	25.159	7.72336	3.1746
3724	CC(C)c1cc2c(cc1O)[C@@]1(C)CCCC(C)(C)[C@@H]1C(=O)C2=O	7	18.2739	156.935	5.88874	6	3	0	3	0	218.097	938	5.67347	1.2	0.289157	4.45096	3.04888	3.40093	2.51305	19.1429	21.451	16.8451	13.1289	12.0222	7.92771	202.606	203.465	144.18	119.932	144.815	161.227	142.407	149.536	149.72	158.201	160.014	167.13	160.203	162.826	84.6039	82.7185	65.9392	-4.11412	-161.868	-118.764	-153.191	-100.958	21.6889	5.0025
1567	Cc1cc(C)c(NC2=Nn3c(nnc3-c3cc(F)c(Cl)cc3Cl)SC2)c(C)c1	16	22.2936	263.382	6.60323	17	9	5	0	3	182.097	1860	8.76487	4.12718	4.50599	4.13858	2.60278	2.29305	2.97667	42.2727	33	31.6304	25.566	26.1084	26.9559	262.329	250.712	204.022	177.758	204.986	162.981	147.651	153.051	155.48	163.301	159.902	167.833	160.917	155.768	85.9253	59.416	-56.599	-22.2057	25.022	134.797	46.7159	-54.1721	13.564	0.353306
2066	N#CC1=C(N)Oc2[nH]c(=O)[nH]c(=O)c2C1c1ccco1	14	15.6419	118.322	5.46656	11	8	4	4	0	234.472	892	13.3571	3.05	4.125	8.37401	6.57273	4.85833	5.64583	31.8571	31.7333	26.0328	28.4921	12.175	11.375	256.06	239.777	216.971	183.939	123.338	163.844	152.434	152.46	156.511	159.932	162.254	167.814	176.949	177.826	19	4	-58	45	15	-82	-67	81	6.18367	1.69388
3013	O=C(c1cccnc1Nc1nc2ccc(Cl)cc2s1)N1CCN(CCO)CC1	10	21.9773	318.26	6.79249	15	9	5	2	1	196.425	1622	7.6677	4.1956	3.89272	4.0922	2.84271	2.73047	3.12082	33.7917	29.8235	21.2281	21.1949	18.9688	20.9655	237.887	198.856	173.622	183.325	187.746	162.709	148.315	157.405	160.726	161.136	164.495	164.067	162.056	157.559	40.2886	-6.4513	15.6388	21.2474	11.9592	-21.3106	-11.7284	-33.9462	8.21354	0.152778
1017	CC(=O)Nc1ccc2nc(NC(=O)CNc3ccc(-c4nc(N5CC(C)CC(C)C5)nc(N5CC(C)CC(C)C5)n4)cc3)sc2c1	19	36.6664	1413.39	8.7798	21	12	9	2	0	305.587	2092	6.49938	3.58291	2.41767	3.43356	2.62449	2.74474	2.31448	23.5056	25.117	16.8043	14.6212	18.7538	14.6145	212.984	179.978	181.277	169.241	204.294	164.515	148.451	157.087	159.44	168.535	159.785	169.034	155.28	161.683	135.676	102.543	64.5788	84.0479	-6.21483	-162.636	-220.54	-229.441	17.2155	-1.12233
1681	COc1cc(-c2nnc(-c3ccccc3COc3ccc(Cl)cc3)o2)cc(OC)c1OC	16	24.6559	529.246	7.4346	23	8	2	5	1	184.089	1592	9.20009	4.22128	4.35597	3.47337	3.05113	2.69765	2.79877	30.0377	28.5179	25.0792	22	17.161	18.1852	243.202	239.253	187.704	196.321	184.145	159.325	144.576	153.42	150.544	155.353	162.161	157.13	160.083	159.401	83.4522	22.9842	10.5575	-54.5017	-91.1444	-2.40554	29.3991	-57.3952	16.3535	5.30794
4107	COc1cc(C2CC(c3cc4ccccc4o3)=NN2C(=O)Nc2ccc(C)cc2)ccc1O	4	26.2485	431.491	7.26117	21	7	3	4	0	239.556	1362	8.60714	5.54545	4.77941	4.27778	3.59421	3.34743	3.29065	24.3214	26.4667	20.488	18.1029	19.1212	17.5956	237.891	214.939	182.603	209.603	200.838	159.38	145.297	150.51	154.975	158.489	161.764	159.16	158.602	157.599	71.9388	21.4694	-47.449	-24.3673	-5.2449	5.73469	15.9796	-26.2245	14.1084	-2.6824
3168	O=C1NNC(Cn2nc(Cc3ccc(Cl)cc3)n(CCc3c[nH]c4ccccc34)c2=O)N1Cc1ccccc1	10	31.1578	515.126	7.60539	26	10	7	2	1	261.589	1832	7.7553	4.74594	3.98043	3.90431	3.13636	3.32931	2.78019	27.3433	27.0694	18.8354	16.1966	18.6573	17.6989	235.706	197.794	175.233	191.545	183.346	162.276	148.894	154.978	158.611	163.193	165.516	161.939	163.956	161.724	61.9057	-5.21931	-94.0616	-103.209	70.2521	57.5911	-18.1863	-36.4206	10.6146	-8.43818
311	COc1cc(/C=C/C(O)=C/C(/C=C/c2ccc(O)c(OC)c2)=N/c2ccc(S(=O)(=O)Nc3cc(C)on3)cc2)ccc1O	25	33.1398	1532.37	8.79318	23	12	3	8	0	405.438	2060	9.17284	4.8	5.13024	5.63109	3.36546	3.35741	3.60561	28.6111	30.6267	23.331	19.9012	18.1562	19.8742	237.337	221.979	190.486	193.743	190.004	159.971	145.16	150.848	153.668	157.304	158.39	156.179	157.845	154.596	48.1615	15.2651	-113.094	-92.5185	-33.9427	51.7449	14.9047	1.37071	14.0561	-8.09279
3285	COc1ccc(C2C3CNc4c(cccc4[N+](=O)[O-])C3=NN2c2ccccc2)cc1	10	23.8964	340.686	6.92957	18	7	4	3	0	244.528	1236	8.92	4.44615	3.88525	4.89056	2.9539	2.80833	2.77755	24.72	27	20.418	19.4776	16.6385	15.3279	239.7	217.825	196.434	189.942	189.842	160.319	146.648	150.381	155.374	159.347	158.288	157.971	156.506	158.448	53.96	16.88	-18.72	-53.84	-41.68	-24.56	21.4	17.28	13.2704	4.4192
1552	Cc1nn(-c2ccccc2)c2c1/C(=N/c1ncn[nH]1)CO2	16	16.8778	201.879	6.0496	16	7	6	1	0	117.417	874	10.0606	3.31667	2.84091	3.55808	2.99183	2.64444	2.36742	26.4848	28.9167	22.5873	21.9516	13.8667	11.6364	241.773	218.048	210.599	185.156	151.516	165.061	152.189	158.785	161.719	160.935	161.985	160.996	168.504	169.241	52.5096	27.9826	-20.5096	-54.1745	-89	-8.45822	-3.53444	27.2222	9.09917	5.22314
1845	COc1c(C(=O)O)c(O)c(S(=O)(=O)Nc2ccccc2)c2occc12	15	19.3932	270.572	6.51683	15	9	1	7	0	317.077	1342	11.538	4.37143	4.25862	8.34414	7.15328	3.85198	4.08908	35.3158	36.625	31.3974	34.1839	17.7571	17.5345	250.926	248.906	213.122	177.384	180.858	159.194	144.69	149.842	151.299	155.358	156.672	164.436	160.918	158.183	5.7116	44.3386	10.9455	129.937	-129.525	-74.0908	-39.9711	-101.978	11.1385	10.1953
4308	Clc1ccc(-c2nn(-c3ccccc3)cc2C(c2c[nH]c3ccc(Br)cc23)c2c[nH]c3ccc(Br)cc23)cc1	0	31.7436	478.939	7.53255	35	7	4	0	3	160.467	4108	7.69566	5.21226	4.01526	2.67446	2.64929	2.60978	2.51033	68.4667	33.5909	27.1259	25.366	28.6497	30.5741	284.822	246.868	245.072	249.535	248.781	153.882	142.19	143.722	149.412	152.811	151.501	151.506	150.145	151.416	37.774	-13.3264	-18.299	-10.3088	29.8568	11.3136	-87.5837	-129.503	10.785	-2.1475
3461	Nc1c[nH]/c(=N/c2nc3ccccc3[nH]2)[nH]1	9	12.7969	90.5458	4.97586	14	6	6	0	0	96.6389	664	8.92308	4.07143	2	3.71688	3.18582	3.16667	2.42222	25.5385	27.8214	18.8235	17.1556	18.1429	11.5333	230.996	186.47	177.533	203.457	191.136	168.637	158.629	159.197	168.208	171.28	175.371	162.566	167.064	162.609	19.8047	13.9349	-34.2485	6.10651	-20.5503	-25.1775	-43.8107	-15.6213	3.95266	-1.73373
863	O=C(Nc1nc(-c2ccc(Cl)cc2)co1)c1c[nH]cc1-c1ccccc1	20	20.5631	206.796	6.28725	22	6	3	2	1	168.783	1298	9.14012	5.36738	5.37945	4.21958	3.4997	3.42506	3.43559	32.45	29.4884	22	22.3951	22.0161	20.8679	264.305	224.332	203.175	195.229	201.478	157.438	144.88	147.853	152.918	156.376	159.238	162.879	161.413	158.032	25.4559	1.40963	-3.80568	24.6619	-15.0543	-20.4972	-23.5257	-44.3354	5.32	-3.48
3630	N#Cc1ccc(Cn2cc(C(=O)O)c(=O)c3ccc(C(F)(F)F)cc32)cc1	8	21.0472	314.759	6.74506	16	8	2	3	3	441.285	1228	13.9474	8.15476	8.52381	11.6128	5.00271	6.958	5.97751	32.3158	30.65	25.0588	21.8571	22.5714	24.2857	264.623	246.595	212.064	222.589	198.072	166.65	145.718	154.982	151.764	164.433	162.447	156.773	169.625	161.122	27	43	-15	-35	-2	-42	-26	-3	3.30471	-5.84695
2351	Cc1nnc(N)n(N)c1=O	13	7.38731	31.0202	3.43464	6	6	5	1	0	122.333	460	10.4706	0	4.12264	7.19608	2	1	3.10306	27.0588	27.8824	26.4643	15.2759	1	19.184	196.742	195.647	97.2295	61.534	31.0837	179.015	170.449	171.91	176.712	185.055	175.461	182.607	184.918	159.627	37.1765	38.4152	-44.7474	-115.093	-25.9273	35.0173	33.218	0	6.41176	-3.23875
1155	COC(=O)c1c(C(=O)OC)c2cccnn2c1C(=O)c1ccc(Cl)cc1	18	19.8726	255.511	6.49878	15	8	2	5	1	260.311	1368	11.2719	3.29592	2.44846	6.67464	5.12525	4.09967	3.1451	35.0769	30.9024	29.2133	28.5595	18.3265	16.7831	258.973	265.396	251.472	223.942	183.257	159.08	144.901	152.888	151.065	155.596	154.732	156.328	161.816	158.533	60.1165	45.3237	44.0991	14.0691	15.7113	-206.054	-313.613	-31.546	14.3373	12.1302
1569	Cc1ccccc1OCc1ccccc1-c1nnc(-c2ccccc2F)o1	16	21.2298	300.438	6.69849	23	5	2	2	1	199.972	1116	9.36364	5.75342	4.4382	4.54482	2.81528	3.11339	3.19913	25.3636	27.0851	21.087	19.6289	21.0274	18.0225	248.687	219.983	189.899	207.399	241.076	159.773	143.419	148.821	153.023	161.017	163.821	158.01	147.894	154.218	57.9504	35.4711	5.93388	-21.6942	3.95041	-6.50413	-39.2975	-45.2893	9.4375	-1.25
3105	O=C1c2ccccc2C(=O)N1CN1C(=O)N(c2ccccc2)C(=O)C1(c1ccccc1)c1ccccc1	10	29.5256	495.087	7.51307	24	7	3	4	0	333.812	1504	9.55172	5.75916	4.68063	5.75539	4.35906	3.98938	3.61606	25.931	27.619	23.0775	23.0629	19.7225	17.9372	257.824	237.722	234.858	220.319	216.697	156.252	142.522	148.138	151.219	156.708	154.714	155.929	153.855	153.409	54.547	58.3829	87.3615	-28.9857	-119.449	-36.8704	-12.4507	-118.52	18.8695	10.225
2700	O=C(O)CNC(=O)c1ccc(NC(=S)N/N=C2/CC(=O)c3ccccc32)cc1	11	21.5984	2462.07	8.83838	12	9	4	4	0	289.93	1408	9.78283	5.16162	5.24444	6.58933	3.42531	3.77221	3.6088	32	29.087	22.0842	21.2088	23.7879	23.9	249.54	210.514	187.022	193.633	204.922	160.497	148.285	150.516	157.721	160.361	161.308	161.521	159.656	156.263	28.1051	-21.9178	-78.1067	-55.4433	34.8393	22.0135	-28.8384	-24.5629	4.78512	-5.95041
549	CCn1cc(-c2nn(-c3nc4ccccc4[nH]c3=O)c(=S)o2)c(=O)c2ccc(C)nc21	23	24.8223	258.779	6.68738	25	10	6	3	0	237.986	1514	10.5201	5.39175	6.2987	5.06353	3.66505	3.47722	3.77609	32.2128	30.3922	26.6731	25.8505	22	24.8961	257.384	238.363	225.447	215.717	193.992	160.691	148.14	154.773	158.171	160.564	158.34	156.544	163.9	159.204	89.1998	98.1124	48.4582	5.29782	-46.9082	-98.3879	-31.0918	33.5614	14.5201	8.01584
328	Fc1ccc(Nc2nc3c(-c4cccc(F)c4)nc4ccccc4c3o2)cc1	25	22.644	388.71	6.99245	25	6	3	1	2	253.278	1178	11.4146	7.41558	5.27848	6.17751	3.8433	4.1544	3.43249	28.7317	29.4889	23.2308	22.9425	22.8571	18.7975	268.826	233.639	241.559	243.934	234.485	161.456	144.569	148.139	158.259	159.972	159.33	156.408	155.549	156.648	35.5973	13.58	-15.4123	-7.13147	-54.1065	-114.305	-14.9905	-17.765	5.49851	0.509816
514	O=c1cc(COc2cccc(O)c2)c2cc(Br)ccc2o1	23	16.5107	212.895	6.10274	16	5	0	4	1	175.328	2068	10.0334	5.6868	5.59432	5.47901	3.25003	3.42646	3.91171	64.625	33.5882	27.5735	25.0299	29.413	28.4884	271.474	233.477	198.026	214.628	224.801	154.505	141.124	145.039	150.523	154.231	157.922	153.518	152.36	152.66	21.0725	-14.6891	-37.4054	-8.94653	-24.3698	11.2745	16.6365	-36.374	2.93945	-3.10352
3629	CC1(C)CC(=O)C2=C(C1)N(c1cccc(C#N)c1)C1=C(C(=O)CC(C)(C)C1)C2c1cccc(C2C3=C(CC(C)(C)CC3=O)N(c3cccc(C#N)c3)C3=C2C(=O)CC(C)(C)C3)c1	8	50.3976	930.704	8.66049	18	8	4	4	0	500.306	2450	6.84483	3.05208	2.59105	4.31298	3.0321	2.70467	2.59407	21.1207	23.7097	18.1922	14.9459	14.8021	12.9297	227.476	219.312	228.008	222.313	186.905	158.786	141.495	147.893	148.978	160.281	152.729	147.98	152.6	158.016	192.85	91.4857	139.66	340.934	-388.975	-301.389	-303.96	5.41439	37.9275	3.40606
2859	CSc1nc(-c2ccccc2O)c(C#N)c(=O)n1C	10.79	14.2277	105.124	5.297	12	6	3	2	0	192.337	1010	9.54815	1.7907	0.153846	6.41123	4.81178	3.94358	3.0679	33.6667	31.2258	28.9298	26.2031	17.3023	7.51282	253.571	258.081	224.172	183.208	175.33	159.812	145.365	152.728	149.957	160.587	152.502	162.425	158.17	167.812	53.5798	63.5042	4.86815	-46.3477	-37.9205	-67.6721	-111.248	-45.2711	12.19	3.71
4518	COC(=O)c1c(C)nc(C)c2c1C(=O)C(Cl)=C(NC[C@H]1O[C@@H]3OC(C)(C)O[C@@H]3[C@H]1O)C2=O	0	25.3066	274.22	6.77708	6	11	2	8	1	330.762	1678	9.811	4.11376	4.90794	6.01386	3.98874	3.59322	3.85047	30.5091	28.1897	25.3692	22.7241	19.1667	19.8476	224.191	218.715	180.793	176.355	165.029	163.455	146.922	156.518	159.076	158.265	162.289	162.37	163.618	165.652	111.384	76.5531	-69.7556	-22.6642	-98.6316	-106.541	17.1057	41.5457	21.0866	10.5769
2082	Sc1nnc(COC(Cn2nnnc2Cc2ccccc2)c2ccc(Cl)cc2)n1-c1ccc(Cl)cc1	14	28.4102	594.534	7.66871	28	11	7	1	2	174.176	2162	8.39506	5.24106	5.26431	3.05573	2.80607	2.82288	2.74362	37.9298	31.0164	23.5197	20.446	25.2148	23.6818	259.035	218.69	195.145	198.902	209.375	160.718	147.364	152.135	157.638	160	162.385	164.222	162.698	159.868	64.7385	-26.0536	-71.7471	-11.1334	41.3693	-59.3294	-41.6322	23.8721	7.22561	-7.97384
4471	CCOC(=O)C1C(=O)C=C(c2ccc(F)cc2)CC1c1ccccc1	0	19.2179	205.443	6.24146	12	4	0	3	1	261.972	1048	8.40909	3.46296	3.09783	5.95391	3.48851	3.50617	3.49215	23.8182	25.0435	17.9346	18.2273	15.0093	13.5217	234.333	203.714	189.576	184.61	170.388	159.91	141.486	147.795	154.683	154.398	155.932	156.458	159.953	161.298	46.686	1.9814	-43.4607	-10.3636	-12.8946	-42.8512	-78.2314	-7.1281	8.34607	0.454029
4179	CC[C@@H](C)C(=O)O[C@H]1[C@H](O)C[C@@H]2[C@@](C)([C@@H]3C[C@H]4C[C@@H](OC)O[C@H]4O3)[C@H](C)C[C@H](OC(C)=O)[C@@]2(COC(C)=O)[C@@]12CO2	3	32.2681	957.75	8.27557	0	11	0	11	0	389.299	1830	6.96552	2.41274	2.42708	4.4747	3.0193	2.86236	3.0272	21.0345	23.2308	17.3855	15.4268	12.5024	12.1224	189.835	185.094	154.407	154.113	136.301	164.943	145.707	155.575	156.284	159.487	161.787	161.617	164.6	166.409	138.967	59.5928	-104.729	-62.3074	23.0106	-84.1172	-186.634	51.6591	35.7401	14.8988
2687	O=c1ccc2ccc(OCc3cn(CC4=C(Cl)c5cc(Cl)ccc5OCC4)nn3)cc2o1	11	25.6223	396.132	7.1449	21	9	3	4	2	201.149	1826	9.73898	5.67615	5.66971	4.10509	2.98365	2.98314	3.06418	37.2653	31.283	25.2544	23.4118	21.9756	23.3425	262.709	231.794	200.662	185.593	198.568	158.606	144.744	150.761	154.206	158.785	158.521	163.472	162.544	161.268	56.2459	-20.0487	-78.7502	-52.4971	14.652	15.8135	8.30776	8.89097	5.17576	-6.16077
2794	CCCCCNC(=O)Nc1c(-c2cccc(F)c2)nc2ccccc2c1O	11	20.6321	891.004	7.7856	16	6	3	2	1	259.722	1134	7.83673	4.20183	3.06731	5.30045	3.68184	4.04128	3.85737	23.1429	24.6667	17.6435	18.0804	17.4495	14.8462	222.805	186.818	190.899	191.22	181.299	164.062	147.265	152.674	161.289	163.081	163.271	161.553	161.966	164.125	63.4115	88.4698	99.0487	58.1458	44.2003	-42.8813	-91.4511	-116.419	10.6781	7.52353
4502	CC1(C)O[C@@H]2[C@H](O1)[C@H]1OC(C)(C)O[C@H]1O[C@@H]2CNC1=C(Br)C(=O)c2ccccc2C1=O	0	25.3082	493.881	7.3337	6	9	1	7	1	253.564	2538	8.8194	3.74365	4.78973	4.61026	2.80264	2.74108	3.12613	46.1455	29.4068	25.5137	22.7152	19.5286	24.0645	227.724	200.9	168.843	163.396	162.152	161.39	145.014	154.063	159.521	158.998	162.542	162.37	163.478	159.16	99.895	39.9461	-142.041	24.6397	-56.7092	-134.912	40.4552	165.646	14.1931	2.21818
3773	COc1ccccc1C(=O)n1cc(C)n(-c2ccccc2Cl)c1=S	7	18.4988	185.951	6.10095	17	6	2	2	1	151.186	1434	8.15511	3.15895	2.88007	3.87656	2.91539	2.69464	2.63681	36.7692	29.8537	28.4875	27.7586	19.9722	17.2222	259.224	249.166	229.671	189.443	189.435	157.05	143.986	151.626	151.781	154.947	151.754	158.692	155.419	157.62	56.3868	25.8371	-13.2501	-36.9504	-59.6256	-61.8693	-14.6646	-37.7636	13.5437	5.1762
4365	S=C1NNC(c2cccnc2)N1/N=C\c1ccccc1OCCCOc1ccccc1/C=N\N1C(=S)NNC1c1cccnc1	0	35.2506	567.23	7.84484	24	14	10	2	0	231.389	2276	8.09185	4.22222	3.90504	3.08518	2.5139	2.66132	2.61219	30.3467	28.6	21.7529	20.1183	20.6778	18.3953	241.614	201.304	198.675	195.55	191.521	162.348	150.641	156.247	159.283	162.293	161.018	158.823	159.896	159.517	58.7856	-44.1276	-37.1451	-59.0391	-32.8784	8.538	-17.0169	-53.8474	11.2889	-4.68
4065	C=C1CC[C@H]2[C@@](C)(CC[C@@H](O)[C@@]2(C)CO)[C@@H]1C/C=C1/C(=O)OCC1OC(=O)/C=C/c1ccc([N+](=O)[O-])cc1	4	29.5574	18747.4	11.1738	6	9	1	8	0	432.931	1640	7.61644	3.41758	3.39344	5.93056	2.69274	3.26496	3.21577	22.4658	24.1053	17.0098	13.0741	15.4615	14.5301	210.197	194.078	133.103	128.276	164.404	162.247	144.914	150.243	152.746	159.096	162.836	166.778	159.674	163.186	80.2454	40.7424	-56.104	-42.0876	200.81	218.344	-7.46557	-128.082	19.5967	-12.4609
1550	CCOC(=O)C(=O)/C(=N\Nc1ccccc1)C(=O)c1ccccc1	16	17.8441	197.023	6.15879	12	6	2	4	0	253.417	1018	9.4	5.50649	3.575	6.33542	4.9473	4.85714	4.03333	25.45	26.3902	20.825	22	21.4805	17.15	236.821	198.558	215.777	230.559	212.289	160.132	145.25	150.953	159.067	161.279	160.861	156.567	158.071	157.449	49.0625	47.8125	90.75	34.0625	-33.75	-110.75	-167.188	-177.5	7.2725	0.6625
2792	CCCCNc1nc(Nc2ccc(C#N)cc2)nc(Oc2cc(=O)n(C)c3ccccc23)n1	11	25.5129	965.344	8.06641	22	9	7	2	0	245.75	1358	8.64286	6.02857	5.32143	4.38839	3.68724	3.44603	3.51538	24.25	26.3729	19.528	19.1349	21.3905	20.1607	232.416	201.439	187.33	201.739	211.614	163.317	148.664	156.805	159.478	162.858	165.392	164.816	163.699	162.151	95.0612	117.714	73.2653	32.5714	-25.4082	-57.6531	-123.429	-119.714	12.5265	6.17411
2274	CCCCc1nc(Cl)c(-c2cc(-c3ccc4ccccc4c3)nc3c2C(=O)c2ccccc2-3)n1Cc1ccccc1	13	32.9675	894.139	8.20685	33	5	3	1	1	220.7	1824	7.32761	4.64597	3.97099	3.19855	2.86832	2.68001	2.63893	26.4348	26.4	20.5655	20.2191	21.5882	19.1062	254.598	226.076	227.149	247.729	232.126	155.502	140.675	146.157	151.882	154.359	154.587	150.8	150.377	152.853	88.8745	85.3332	87.721	51.6512	56.8353	-51.8604	-116.93	-116.154	19.5835	14.4333
1656	CN1C(=O)C2NC3NNC(C#N)C(=O)N3C2N(C)C1=O	16	15.6989	119.969	5.48038	0	10	7	3	0	256.444	908	10.8485	3.57143	3.56	7.77104	4.90171	4.69841	6.74	27.5152	28.7429	23.3218	19.9184	14.5476	12.28	211.868	198.8	158.435	126.431	135.15	172.937	159.823	170.759	166.408	173.502	167.766	176.839	175.299	181.424	47.1478	20.4279	-49.3416	-111.089	-13.4004	59.1598	-32.259	-4.07622	12.0579	-0.14876
3796	CCCCc1nc(Cl)c(-c2cc(-c3ccc4sc5ccccc5c4c3)nc3c2C(=O)c2ccccc2-3)n1Cc1ccccc1	7	35.7151	902.125	8.28636	36	6	3	1	1	226.675	2152	7.47291	4.69354	4.22938	3.14827	2.82364	2.63141	2.63078	29.8889	28.4051	22.6686	21.7351	22.0465	20.3948	264.043	236.029	235.871	249.394	232.623	154.035	139.715	144.852	150.507	152.598	152.877	149.966	150.162	152.425	87.6428	85.8765	96.4095	52.2033	35.6292	-59.9758	-97.8791	-92.5054	21.2924	17.1875
636	CC(Cl)OC(=O)O/N=C1\CC(c2ccccc2)N(C)C(c2ccccc2)C1C	22	21.5175	448.328	7.13515	12	6	2	3	1	185.783	1396	6.70953	3.12938	2.86285	3.50534	2.5304	2.75937	2.67782	26.3396	25.2364	17.7165	16.8231	14.9247	15.8516	221.401	194.858	169.72	159.239	162.617	161.498	145.016	153.878	156.386	159.25	159.264	161.658	161.171	159.05	73.949	36.1238	-20.8629	-73.2154	-40.7716	-37.8246	-46.562	23.5511	11.4649	1.14703
3498	O=C(NC(=S)Nc1cccc([N+](=O)[O-])c1)c1cn(CCO)c2c(cc(Cl)c3ncccc32)c1=O	8	26.4553	1820.31	8.73054	20	12	5	5	1	365.825	1918	10.921	5.83333	5.68165	7.31649	4.10245	4.8912	4.08842	38.36	31.9623	26.8684	28.0167	26.537	24.5843	264.28	241.007	230.907	203.909	198.388	160.142	148.341	150.94	155.462	157.725	155.04	159.887	162.22	160.926	34.9353	17.1847	24.4563	-42.0063	-71.6312	-76.4079	-23.0801	-8.77331	9.12	3.64
3134	Cc1ccc(C(=O)N(/N=C/c2c[nH]nc2-c2cccc(Cl)c2)C(=O)c2ccncc2)cc1	10	24.9437	258.289	6.71723	23	8	5	2	1	240.061	1544	9.1921	6.46625	5.31379	4.80122	4.00474	4.1144	3.32122	30.88	28.8113	23.2596	22.1667	22.2804	20.6296	257.545	228.977	218.975	236.58	220.785	159.337	145.996	150.352	153.603	160.79	162.121	155.841	157.742	153.867	50.6098	11.8824	27.623	26.4534	-14.577	-55.4695	-40.6294	-52.9269	9.2528	-4.7216
2622	Cc1cc(-c2n[nH]c(=S)o2)c2ccccc2n1	12	13.5325	88.9312	5.01849	15	5	3	1	0	87.8471	908	9.40171	0.914286	0.117647	3.37873	2.79257	2.1037	1.3671	34.9231	30.7143	24.5882	22.16	18.0286	11.9412	265.58	242.16	216.937	175.911	145.322	158.165	146.663	150.766	152.486	154.055	155.417	163.586	166.21	164.958	39.5556	20.5556	-24.6667	-23	-46.6667	-62.8889	-16.2222	52.5556	5.80473	2.62574
193	Nc1ccc(S(=O)(=O)Cl)cc1	28	8.30271	37.0809	3.70841	6	5	1	2	1	143.471	944	8.82643	0	4.12264	8.4395	12.4062	5.11523	3.10306	55.5294	54.1176	29.0323	21.875	11	19.184	264.968	223.816	135.715	216.298	96.3961	160.465	145.021	149.218	152.606	165.334	172.914	173.217	182.236	159.627	-13.7168	-3.74676	-4.03153	-1.94259	2.92118	11.7671	-27.2107	0	-0.176471	-3.75433
3458	O=C1N/C(=N\c2ccc(Cl)cc2)S/C1=C\c1ccc(O)cc1	9	17.2583	162.235	5.8775	12	6	2	2	1	168.925	1358	8.97119	5.36876	6.00617	5.11895	3.79436	3.75997	4.57813	41.1515	33.3429	25.8358	23.6833	28.4783	25.3611	276.92	227.802	234.295	232.57	210.461	155.505	142.957	144.654	152.752	156.659	153.588	153.109	158.891	156.685	9.12066	-24.9911	-32.143	7.15842	40.8774	-27.1231	-36.4142	1.70044	1.84757	-6.29752
4239	C=C(CCO)C(=O)OC[C@H]1O[C@@H](Oc2ccc(O)cc2)[C@H](O)[C@@H](O)[C@@H]1O	0	19.546	367.235	6.86151	6	9	0	9	0	339.5	1210	8.95833	4.45714	3.75472	7.07292	3.84791	4.22566	4.24292	25.2083	25.6735	19.4397	16.4098	17.2	15.3679	204.816	172.337	155.681	170.784	165.502	164.432	148.389	153.952	161.29	165.722	165.362	160.625	160.851	163.874	15.5069	-20.0069	-17.9444	-90.9028	23.6736	17.7847	-9.60417	-8.59722	7.84028	-7.84028
4277	COc1ccc(-c2nn(-c3ccccc3)cc2C(c2c[nH]c3ccc([N+](=O)[O-])cc23)c2c[nH]c3ccc([N+](=O)[O-])cc23)cc1	0	35.3076	647.978	7.95546	35	11	6	5	0	407.194	1826	10.2941	6.33333	6.19087	5.98815	3.39292	3.32783	3.4018	26.8529	28.6081	22.0705	20.3855	21.1937	20.9502	253.881	239.536	225.187	235.833	230.933	159.073	146.724	147.74	151.336	155.242	154.411	155.218	153.363	154.513	62.2699	11.0173	-62.9827	-81.5363	87.7509	43.173	-136.955	-38.7474	15.8339	-0.377163
3097	COc1ccc2nc(C)cc(-n3cc(CN(C)C4CCCCC4)nn3)c2c1	10	21.2702	402.379	6.99065	15	6	5	1	0	138.194	1092	6.25926	2.52252	2.28409	2.55916	2.39348	2.34885	2.37342	20.2222	23.5088	15.803	13.8188	13.3063	14.2273	206.779	182.168	157.633	150.82	149.115	164.761	148.334	157.68	159.963	163.075	163.837	166.567	169.139	163.322	96.0412	51.6104	18.2181	63.8834	57.7051	-29.7188	-98.2551	-135.669	14.3426	2.85494
1989	COc1ccc2nc(C)cc(-n3cc(CN4CCN(C(C)=O)CC4)nn3)c2c1	14	22.0867	437.575	7.11087	15	8	6	2	0	186.944	1166	7.73077	3.4433	3.34524	3.59509	2.62156	2.66495	2.71528	22.4231	25.2364	18.3051	15.5882	15.0309	15.9762	213.635	199.593	156.876	159.066	162.152	165.62	150.175	161.075	161.092	160.621	165.807	168.007	167.952	160.366	96.963	10.8683	-89.429	5.07988	44.0814	-53.4423	-84.747	-59.5355	14.1672	0.122781
4155	O=c1c2cc(Br)ccc2nc(Cc2ccccc2Nc2c(Cl)cccc2Cl)n1-c1ccc(/N=C/c2cccc([N+](=O)[O-])c2)cc1	3	35.6477	1848.12	9.026	34	11	5	3	3	336.922	3486	9.37727	5.20204	4.83882	5.02869	3.19319	2.93815	2.98074	52.0299	32.6528	27.7662	26.3086	24.3034	23.7374	278.515	243.479	232.728	240.176	228.405	156.233	143.543	146.054	153.679	156.992	155.384	152.481	151.813	155.256	49.0933	4.30864	-25.2675	-41.823	-48.9835	-79.6406	20.0425	17.1166	8.89174	-7.80129
3746	O=C1CSC(=O)N1	7	5.16853	18.1904	2.54422	0	4	1	2	0	115.476	544	12.4444	4.62069	4.12264	11.5476	3.26652	3.19888	3.10306	54.4	42.7	25.1429	16.4	20.3819	19.184	263.667	160.71	200.592	199.944	196.068	162.461	149.8	153.37	166.956	185.131	160.153	159.579	160.077	159.627	10.2222	-1.77778	-42.6667	7.55556	0	0	0	0	-0.8	-1.76
1786	Oc1ccc(/N=N/c2ccccc2)cc1CNC12CC3CC(CC(C3)C1)C2	15	21.9893	2529.85	8.82917	12	4	3	1	0	153.007	1066	5.51852	3.01724	2.61739	2.83346	2.31707	2.46121	2.51377	19.7407	22.931	13.5521	9.96591	14.5948	13.6957	213.453	167.272	146.229	176.374	177.9	161.634	144.827	148.943	157.733	166.957	165.533	158.173	156.64	159.167	45.1084	-6.51852	-8.20439	54.9904	52.2455	31.1276	-37.4129	-63.4678	6.23594	-11.9815
767	Cn1c(=O)c2c(n(C)c1=O)n1c(-c3ccc(Cl)cc3)nnc1n2C	21	19.2629	231.106	6.31835	18	9	6	2	1	197.033	1264	10.5299	3.16148	2.69303	5.32522	3.60795	2.98178	3.19516	34.1622	30.925	29	23.957	17.68	17.7797	247.391	251.608	205.937	180.993	168.107	165.199	152.173	163.386	155.131	167.781	164.777	165.279	163.677	164.308	86.0891	93.3954	-2.61299	-150.543	-135.357	-46.8269	5.74807	-25.9421	17.9452	8.21768
3658	COc1ccc(-n2c(Sc3sc(N)nc3C)nc3ccc(Cl)cc3c2=O)cc1	8	22.1152	253.162	6.56365	21	9	4	2	1	180.679	1824	8.89521	5.92076	3.64352	4.20183	2.95843	3.46044	3.18437	42.4186	34.7391	32.1294	30.6556	31.8488	22.6771	270.154	263.82	238.435	243.414	258.658	157.71	144.994	150.495	151.865	151.584	155.046	154.497	149.775	152.802	52.6041	18.1288	-31.2505	-21.1601	23.492	-12.6396	-50.6678	-97.4976	13.0617	5.12547
3394	O=C1N/C(=N\c2ccc(Cl)cc2)S/C1=C\c1ccccc1Cl	9	17.2179	157.981	5.85093	12	6	2	1	2	133.736	1582	8.4892	4.9436	4.42157	4.17926	3.62619	3.71062	3.15414	49.4375	35.6765	29.6154	28.4107	29.0227	24.7059	293.589	241.404	258.612	247.623	215.489	154.046	141.5	144.218	152.266	155.05	151.86	152.592	158.018	157.023	11.6344	-20.2633	-14.4695	7.26042	36.556	-15.4255	-42.3436	-31.0686	1.69531	-5.01172
3751	O=c1c2cc(I)ccc2nc(Cc2ccccc2Nc2ccccc2)n1NC1=NNC(c2ccccc2)C1	7	30.3817	731.995	7.93077	28	8	6	1	1	217.856	4272	7.76229	4.72249	4.6608	3.45803	2.9745	2.81722	2.84123	67.8095	30.5147	23.4702	21.9806	21.3313	24.135	257.398	212.195	202.906	210.73	201.689	158.554	146.057	148.958	157.411	160.387	159.976	158.416	158.39	156.87	50.0793	-7.1509	-15.2968	14.6644	20.2608	-44.2852	-13.1639	-26.0539	9.23583	-5.97506
4043	COc1ccc(/C=C/C(=O)c2cc(C(=O)/C=C/c3ccc(OC)c(OC)c3)c(OC)cc2OC)cc1OC	5	28.2604	645.977	7.80576	18	8	0	8	0	306.833	1622	8.73529	4.51948	4.78523	4.51225	3.60158	3.20707	3.32289	23.8529	25.5429	23.456	19.9342	16.2208	17.047	226.017	242.951	177.889	171.472	177.409	159.338	143.388	154.46	148.109	151.167	156.922	158.547	157.606	157.59	109.708	-2.1955	-40.833	-97.9862	-110.729	-4.38322	132.898	44.0701	24.5865	6.72491
1986	O=C(N/N=C/c1ccc(Cl)c(Cl)c1)c1ccc(-n2c(-c3ccccc3)nc3c(Br)cc(Br)cc3c2=O)cc1	14	29.9909	4120.18	9.65865	28	10	4	2	4	244.25	4376	9.39526	5.03973	4.76503	4.52316	3.42896	3.07949	3.30412	81.037	37.3793	36.4215	41.8512	31.4274	31.7869	299.567	261.414	250.488	257.157	241.807	154.449	142.523	145.476	151.483	157.343	156.249	150.455	149.316	153.604	34.7562	2.73929	31.7578	-11.3041	-98.4294	-114.724	-37.4355	69.2018	7.23594	-5.12894
2534	O=C1N(c2ccccc2)C(=O)C(c2ccccc2)(c2ccccc2)N1Cn1cnc2ccccc21	12	28.014	509.859	7.4869	27	6	4	2	0	244.257	1390	8.49123	4.6178	3.52105	4.28521	3.61628	3.19561	2.77061	24.386	26.8065	21.5	21.5677	17.8796	15.4421	252.138	229.995	227.384	215.765	209.09	157.212	143.533	149.567	152.407	156.989	155.247	156.196	154.294	154.514	51.2216	36.9335	63.169	-5.9723	-85.9751	-98.2992	-103.429	-95.8421	17.6953	9.24931
2837	COc1cc(/C=C/C(=O)CC(=O)/C=C/c2ccc(O)c(OC)c2)ccc1O	11	20.1557	162.875	6.08623	12	6	0	6	0	286.972	1160	8.89362	4.82927	5.05714	6.10579	3.49495	3.74458	4.79524	24.6809	25.5833	20.5652	16.92	16.2927	18.5286	230.082	214.825	166.786	170.755	166.781	159.016	143.525	149.957	151.853	155.492	159.248	157.723	160.313	158.757	44.3567	-31.2721	-74.2879	-51.7107	-37.0937	6.43413	99.1236	-18.4762	9.2105	-6.21458
1534	Cc1ccc2c(c1)/C(=N/c1ccc(N3C(=O)c4ccc(Cl)cc4C3=O)c(C)c1)C(=O)N2	16	25.0007	383.564	7.08091	18	7	3	3	1	264.172	1508	9.90649	4.53827	3.94938	5.62068	3.78447	3.25976	2.69787	32.0851	29.4314	25.4667	22.1228	19.5111	17.4889	266.911	250.785	220.992	211.74	208.283	156.595	142.926	147.621	150.671	156.746	155.491	156.461	153.331	157.932	68.862	60.1486	14.3358	-6.57774	-116.812	-213.375	-33.7958	37.7411	13.8606	1.88818
2388	COc1ccc(Cc2nnc3sc(Cc4c[nH]c5ccccc45)nn23)cc1OC	12.37	23.1323	329.938	6.86362	23	8	5	2	0	150.67	1404	8.63426	5.60985	5.48792	3.13896	2.62133	2.64064	3.00895	29.25	29.5962	23.4898	19.3394	20.8182	23.2609	244.387	230.044	182.886	191.128	186.472	160.636	147.133	153.072	153.443	156.922	161.118	161.929	163.782	161.286	68.7901	-2.49769	-54.1836	-95.2585	-37.804	81.4907	129.105	-40.7338	14.4184	2.94401
852	CSc1nnc(NC(=O)c2cc(-c3ccccc3)nc3ccccc23)s1	20	20.4537	259.114	6.51278	21	7	4	1	0	163.312	1470	8.67222	4.77083	3.92342	4.08281	3.25685	3.18372	2.99641	36.75	33.2558	25.3125	24.2317	24.3625	22.7973	271.63	243.47	231.094	236.808	221.251	156.075	143.184	146.084	151.234	154.752	155.009	153.179	154.743	156.725	45.6522	38.0467	-0.822222	-21.6689	-8.43333	-54.0078	-42.6667	-46.3044	8.72	2.72
355	CC1(c2cc(O)ccc2O)NNC(=O)CO1	24.1	12.4059	76.9438	4.81308	6	6	2	4	0	188.674	726	9.5	3.15152	4	6.73834	3.85744	4.19192	6.61111	25.9286	26.7241	21.0317	16.5652	10.5152	12.1667	212.87	196.21	138.887	124.358	100.591	166.116	153.002	156.479	161.371	163.009	167.403	171.121	174.361	177.076	25.8316	-8.29592	-78.9643	-18.2602	16.6684	-56.0663	53.2296	18.2653	6.34184	-5.16327
3861	CC(=O)OCC1=C(C(=O)O)N2C(=O)[C@@H](NS(=O)(=O)c3ccc(NC(=S)NCc4ccccc4)cc3)C2SC1	6	29.6209	12017.4	10.7291	12	14	4	7	0	417.511	2300	9.21505	4.93675	5.54493	6.73405	3.73256	4.06904	5.3701	37.0968	34.5385	25.5036	25.2258	24.8154	25.0348	244.98	217.825	191.729	199.563	194.546	160.423	146.233	152.406	154.727	159.315	161.359	158.305	160.206	157.602	25.2737	28.6746	-56.6101	-37.2007	3.17829	41.1492	6.73373	2.83489	9.38189	-4.39334
3983	CCN(CC)c1ccc(/C=C/C(=O)c2cc(C(=O)/C=C/c3ccc(N(CC)CC)cc3)c(O)cc2O)cc1	5	28.4792	817.477	8.04122	18	6	2	4	0	322.778	1542	6.45946	3.91176	4.38281	4.36186	3.21576	3.19118	3.24392	20.8378	22.9474	17.2096	16.011	15.8088	16.7734	216.537	197.918	153.301	147.254	184.21	160.524	144.417	152.735	157.041	153.032	158.797	162.537	156.657	153.355	100.177	67.5836	-10.7261	-8.26516	115.406	160.948	-13.6012	26.2593	20.6983	0.638422
203	COc1ccc(N2CCN(c3nc(Nc4ccc(C#N)c(C(F)(F)F)c4)nc(Oc4ncnc5ccccc45)n3)CC2)cc1	27	34.8612	493.266	7.68265	28	14	9	2	3	435.118	1916	11.2941	7.93478	7.38889	6.39879	3.38163	4.0789	3.6305	28.1765	29.1096	22.5752	21.0357	23.6957	23.3611	244.195	222.613	183.793	188.838	214.302	168.009	149.961	161.896	159.075	164.232	168.736	168.699	168.373	160.514	92.9732	100.187	-0.897059	1.93426	77.5	-39.8971	-61.2872	-53.0017	10.1825	0.200692
1213	O=C1N(c2ccccc2)C(=O)C(c2ccccc2)(c2ccccc2)N1Cn1ccnc1	18	24.5593	390.487	7.0988	23	6	4	2	0	228.701	1244	8.5098	3.56977	2.38509	4.48434	3.74952	3.09835	2.45238	24.3922	26.7273	21.0826	21.854	15.8372	12.4348	247.365	225.441	234.019	211.995	191.441	158.511	144.706	151.581	152.738	157.524	154.659	156.248	155.845	157.64	42.8793	22.8908	67.1226	36.326	-103.331	-175.093	-144.25	-34.2022	15.3979	8.74394
1482	Clc1cc(Cl)c(Cl)c(-c2nnc3sc(-c4ccncc4Br)nn23)c1	16	19.2464	185.343	6.09768	20	10	5	0	4	96.9865	3102	10.9078	6.66786	6.24005	3.34436	3.17874	3.00231	2.83436	106.966	48.8125	56.4912	64.8462	63.3871	48.7037	348.735	318.175	305.419	323.9	321.664	155.424	145.614	148.372	151.393	155.453	160.372	156.511	152.43	147.193	16.5245	-13.6126	13.8918	19.5076	-17.5665	-52.2608	-41.1372	-24.2092	2.31391	-1.90606
3852	Cc1ccc2[nH]c(-c3ccccc3)c(C3C=C(c4ccc(Cl)cc4)Oc4[nH]nc(N)c43)c2c1	6	26.8343	398.785	7.18235	26	6	4	1	1	163.672	1542	7.8075	4.34738	3.27146	3.03096	2.832	2.75507	2.75167	28.5556	27.6441	21.8889	19.6357	18.454	17.0898	255.21	236.218	223.272	228.725	204.071	157.505	144.965	146.008	150.268	154.549	153.327	152.288	155.809	158.624	55.8762	26.9966	-22.0715	-12.9021	21.1232	-7.17567	-94.1836	-147.38	14.689	2.95542
4102	C=C1CC[C@H]2[C@@](C)(CC[C@@H](O)[C@@]2(C)CO)[C@@H]1C/C=C1/C(=O)OC[C@H]1OC(=O)CNC(=O)OC(C)(C)C	4	27.8438	10642.4	10.5535	0	9	1	8	0	379.688	1574	6.44156	2.9064	3.06349	4.93101	2.41076	3.13109	3.55254	20.4416	22.3165	15.7349	12.2042	14.3793	13.963	190.699	180.428	129.796	121.71	147.989	164.934	146.464	154.584	154.997	161.491	164.678	167.238	162.502	167.351	105.442	46.8823	-97.5741	-35.9123	94.1407	205.188	20.1771	-218.072	21.5527	-8.68696
2147	COc1cc(/C=N/N=c2\scc(-c3cc(O)ccc3O)n2-c2ccc(Cl)cc2)ccc1O	14	24.9437	778.49	7.82051	23	9	3	4	1	242.259	1794	9.12099	5.27246	4.97849	4.84517	3.36077	3.38263	3.29489	35.88	31.3774	26.4216	24.1636	25.8317	23.3871	259.933	240.744	215.998	218.814	214.944	157.916	145.107	147.812	152.749	156.398	157.629	156.036	158.482	155.776	35.3467	-13.9763	-40.4306	-34.7457	-8.1758	-5.24198	11.5674	-57.1373	12.0128	-2.1568
2286	COc1ccc2nc3[nH]c(=O)[nH]c(=O)c3cc2c1	13	14.2396	103.409	5.22648	14	6	3	3	0	180.194	780	11.6296	5.6129	3.26316	6.67387	3.89035	4.68638	4.47368	28.8889	29.6552	24.8036	22.1273	18.5161	16.7368	249.669	240.352	183.971	183.714	158.261	162.069	149.324	154.704	155.53	159.675	160.236	160.881	168.836	166.72	31.8889	4.55556	-54.1111	11.7778	37.4444	0.555556	-5.55556	-64.2222	6.10562	0.278464
1756	Cc1cc(=O)oc2cc(Oc3nc(Nc4ccc(N5C(=O)CSC5c5ccc(Cl)cc5)cc4)nc(N(C)C)n3)ccc12	15	33.6073	862.026	8.19437	28	12	6	4	1	291.12	2200	9.22462	5.4193	5.28467	4.34507	3.34537	3.08505	3.13605	32.8358	30.3472	25.0479	21.6951	21.5985	21.5474	252.37	234.84	206.619	197.774	207.061	159.873	145.92	154.078	153.338	159.66	157.405	161.719	159.841	157.302	107.57	75.3811	-58.7971	-1.26538	-103.494	-73.1254	-53.2827	15.346	14.6237	-0.522611
3639	CCCC[S+]([O-])SC	8	5.05914	22.1293	2.87376	0	3	0	1	0	91.3429	768	3.18765	0	0	4.56714	2.46914	1.5	1	38.4	39.7895	14.6316	13.6364	3.5	1	195.027	132.715	111.878	102.13	72.9102	162.655	142.083	154.625	160.975	163.13	165.044	165.561	169.02	184.918	-5.52951	3.35136	1.88543	-16.9078	-3.12185	-13.9244	3.02815	5.92111	1.71	-1.94
3666	N#C/C(=N\Nc1ccc(Br)cc1)c1nnn[nH]1	8	12.7969	85.2338	4.97603	11	8	7	0	1	124.995	1898	11.8725	7.08148	5.13366	5.43456	4.00148	4.5621	3.85232	82.5217	39.25	33.625	28.9189	31.2	34.6957	278.468	228.234	216.876	250.216	232.526	168.213	159.1	157.545	163.159	172.012	172.917	157.106	165.111	176.702	16.7012	-2.2008	18.2799	39.255	6.44213	-16.6521	-42.3626	-38.7163	1.42155	-5.24575
258	COc1ccc(-n2cc(Cn3c(-c4cccc(F)c4)nc4ccccc43)nn2)cc1	26	23.9488	491.735	7.29655	26	7	5	1	1	209.722	1236	9.58333	5.48515	5.03191	4.36921	3.05608	3.26458	3.37855	25.75	27.8462	21.2233	19.3853	18.8713	17.9149	248.133	222.451	207.365	204.565	196.263	162.292	147.183	153.204	157.744	162.038	159.208	158.861	162.377	166.054	61.7778	-1.88889	-77.8889	-73.2222	41.2222	49.7778	-16.1111	-34.8889	10.7153	-0.0190972
2651	COc1ccc(Cc2nnc3n2NC(c2cccn2C)S3)cc1OC	11.39	19.7062	294.759	6.60245	16	8	5	2	0	132.865	1260	8.05556	4.18333	3.66162	3.01965	2.57095	2.54487	2.62243	28.6364	29.0426	23.8523	19.5882	17.75	18.8788	228.102	219.941	165.398	173.731	167.9	163.713	150.081	158.796	155.83	158.645	164.816	164.452	165.424	164.139	71.7805	-3.76492	-67.8182	-57.9568	4.41139	15.5161	48.8815	-38.0303	15.2164	3.39256
180	COc1ccc(C(=O)/C=C/c2ccc(OCc3nnc(COc4ccccc4)o3)c(OC)c2)cc1	28	26.8986	441.348	7.3426	23	8	2	6	0	245.75	1478	9.25424	5.62857	4.73267	4.16525	3.34127	3.39894	3.33801	25.0508	26.9194	20.9913	18.0579	19.5524	18.3069	236.711	214.274	179.706	181.432	198.16	159.265	144.247	152.322	154.679	155.327	157.98	161.204	159.017	157.569	76.0394	-23.7785	-83.5309	-70.0793	53.2821	73.7363	-16.3513	-89.2795	10.9402	-4.57369
3564	O=C(O)c1cccnc1Sc1nc2ccc(Cl)cc2c(=O)n1Cc1ccccc1	8	22.8223	301.827	6.77457	22	8	3	3	1	243.481	1654	9.76859	6.43223	5.48778	5.66235	4.00842	3.66027	4.34385	38.4651	32.6522	28.3085	29.0312	26.8511	22.05	274.625	246.884	246.123	249.606	248.65	156.211	142.823	147.579	150.948	158.066	154.358	155.139	150.166	153.67	26.0335	-4.53743	11.6221	4.60964	7.75543	-28.1672	-45.0084	-66.0015	6.63872	-1.05462
1280	CC(C)[C@@H]1CC[C@@H](C)C[C@H]1OC(=O)C1=C2c3ccccc3S(=O)(=O)N2CC1	18	21.5623	621.869	7.42598	6	6	1	4	0	250.605	1344	6.3786	1.93963	1.63131	4.64083	3.55138	2.53209	2.03674	24.8889	28.2456	17.8947	15.3353	13.6693	13.7197	211.829	184.527	151.157	155.808	159.448	161.404	142.697	152.03	155.143	161.298	162.892	160.731	159.659	159.303	47.7522	125.535	101.234	44.5563	-76.731	16.5511	-102.216	-35.2748	16.6204	8.65123
2569	Cc1c(C(N)=O)sc2nc(SCC(=O)Nc3ccc(Cl)cc3)n(-c3ccccc3)c(=O)c12	12	25.0816	1577.57	8.52679	21	10	4	3	1	274.707	1998	9.11212	4.9857	5.10393	5.60626	3.94941	3.52118	3.3845	40.7755	33.75	31.0097	30.1667	27.4356	23.5714	268.689	249.065	226.851	225.926	222.299	157.494	144.763	147.881	152.749	154.44	158.198	154.605	152.129	155.621	50.6834	22.3166	-49.7	2.04677	-100.224	3.54631	-16.922	22.9869	11.4165	3.47813
2252	COc1ccc(C2CC(c3cc4ccccc4o3)=NN2C(=O)Cn2c3ccccc3c3nc4ccccc4nc32)cc1	13	34.3128	996.091	8.33892	32	8	5	3	0	247.889	1686	9.13433	6.07647	5.33333	3.69983	3.32828	3.20588	2.93761	25.1642	27.6622	21.7342	20.2909	20.4529	18.5902	254.364	228.055	203.888	217.215	218.74	157.411	143.606	149.402	155.438	155.973	158.71	156.609	155.413	156.309	85.2954	23.7652	-46.6077	-70.9243	20.4308	3.86679	-54.7772	0.575184	17.1141	3.29472
3494	Nn1c(SCC(=O)c2cc3ccccc3oc2=O)nc2sc3c(c2c1=O)CCCC3	8	24.1152	866.837	7.86346	19	9	3	4	0	267.896	1688	9.46572	5.74786	6.25926	5.69991	4.04192	4.24011	3.55255	35.9149	32.6471	27.0973	27.3661	25.7179	23.375	259.816	231.27	207.027	206.467	207.045	157.372	143.671	147.637	151.911	155.64	158.403	158.97	159.08	155.795	65.5039	76.9119	43.0847	-39.3575	-119.144	-104.611	4.82818	131.922	11.3594	4.14169
1128	O=c1c2cc([N+](=O)[O-])ccc2n(C(O)/C=C/c2ccccc2)c(=S)n1Cc1ccccc1	18	24.9722	680.072	7.68535	22	8	3	4	0	312.93	1542	9.26362	5.17222	4.83196	6.13589	4.61013	3.42016	4.19345	30.2353	28.5556	22.8992	22.7308	21.8583	21.5124	253.868	226.139	216.706	207.127	213.155	157.634	144.86	148.628	152.352	157.744	154.897	157.723	155.202	155.228	33.5749	7.34542	8.80029	-22.6146	32.0746	40.5579	-23.2652	-85.2957	8.80277	-1.98808
3256	Cc1c(/N=C/c2ccccc2O)c(=O)n(-c2ccccc2)n1C	10	17.8321	280.35	6.46895	17	5	3	2	0	183.667	940	8.1	3.825	2.47945	4.59167	3.10826	3.48472	2.89498	23.5	25.6429	21.1687	17.5714	15.8375	12.9452	232.861	216.085	175.098	191.934	171.102	160.763	146.756	153.718	157.646	159.565	163.464	156.136	160.024	162.094	57.205	35.77	-14.2925	-82.4225	-68.1225	-8.655	-3.55	-55.4675	13.1362	0.8575
293	O=C(O)CC(O)(CC(=O)N1CCN(c2cc3c(cc2F)c(=O)c(C(=O)O)cn3C2CC2)CC1)C(=O)O	25	28.295	1317.02	8.46406	10	13	3	9	1	550.118	1656	10.8	3.80255	3.58333	9.16863	4.26863	4.342	3.92342	27.6	27.5556	21.2434	20.2254	16.3567	14.5903	222.357	204.866	172.383	170.529	159.578	166.01	149.02	156.535	161.279	160.257	164.959	165.403	166.85	167.804	66.48	35.04	-65.68	0.08	40.8	-106.56	-178.68	-48.96	12.57	-9.29
3245	COc1ccc(C2=NN(c3nc(-c4ccc([N+](=O)[O-])cc4)cs3)C(c3ccc(SC)cc3)C2)cc1	10	27.5533	476.585	7.41941	23	9	4	3	0	261.896	1858	8.577	5.65455	4.13006	4.59466	2.46949	3.1876	2.7006	32.5965	30.9672	23.6311	21.7333	26.6818	22.5581	254.584	232.89	189.343	210.684	247.437	157.558	143.838	148.55	152.155	154.296	158.99	156.188	150.563	152.559	72.9122	32.3092	-73.3237	-65.8239	49.3367	50.5096	-36.8498	-64.1045	13.908	-2.43336
2311	N#Cc1c(NN)nc(NN)nc1-c1c(-c2ccccc2)[nH]c2ccc(Cl)cc12	13	21.7466	252.015	6.55911	21	9	8	0	1	187.589	1380	9.06058	4.60504	2.8697	4.36253	3.7831	3.6224	3.30376	32.093	29.5435	24.8696	25.0938	21.8824	19.5364	254.967	243.822	245.181	233.889	203.426	163.743	153.456	152.484	155.435	158.208	156.483	158.869	161.924	168.775	31.6055	33.8774	53.7021	8.48473	-27.7979	-90.2824	-124.739	-117.15	13.4803	8.50297
3972	Clc1ccc(-c2[nH]ncc2-c2nc(-c3ccc(Br)cc3)c(-c3ccc(Br)cc3)[nH]2)c(Cl)c1	5	25.6103	308.528	6.89496	28	8	4	0	4	131.723	4102	8.33357	4.84147	4.13465	2.86354	2.72525	2.63345	2.47797	89.1739	38.22	33.7426	32.402	34.6075	31.1215	304.078	262.168	242.851	247.262	249.904	154.181	143.078	144.519	149.684	155.445	156.835	153.152	151.229	154.69	25.8505	-7.61097	6.98858	15.5779	-34.3766	-51.2856	-36.664	-43.1623	6.19849	-4.24764
4343	C[C@H]1CCC2C(C)(C)CCC[C@]2(C)/C1=C/c1cc(O)c(O)c(/C=N/CCS(=O)(=O)O)c1OS(=O)(=O)O	0	28.2415	1656.6	8.69345	6	12	1	9	0	463.557	2036	7.19562	3.41935	3.45224	6.52898	3.06417	3.38052	4.29665	28.6761	32.0274	17.5309	14.8294	19.4424	20.3772	206.151	192.138	151.093	142.784	172.688	163.523	144.507	152.599	153.411	158.786	159.449	164.493	158.881	160.694	21.1835	190.701	-27.9823	115.866	218.852	149.539	-34.7002	-87.9122	15.7334	-2.12319
1080	COc1cc(C2CC(c3cc4ccccc4o3)=NN2C(=O)Nc2ccc(F)cc2)ccc1O	19	26.2485	431.491	7.26117	21	8	3	4	1	296.556	1404	10	6.33333	5.36923	5.59539	3.75902	3.87191	3.43483	26.4906	27.8596	21.5714	19.7097	20.2222	18.3615	244.946	216.794	190.534	211.122	205.18	161.27	146.103	150.805	157.643	159.381	161.578	159.483	159.482	157.261	57.3621	1.98932	-75.5639	-69.8896	-17.7935	-3.30153	43.3008	39.6063	10.9598	-4.01139
4260	Cc1ccc(N2CCn3c(COc4ccc(Cl)cc4C)nnc32)cc1	0	19.925	359.684	6.80152	17	6	4	1	1	121.255	1252	7.40011	3.95931	2.63818	2.7558	2.36675	2.67122	2.3562	28.4545	27.0851	20.5773	17.0481	19.3099	15.9487	234.796	208.368	163.846	169.549	201.009	161.843	147.048	155.913	157.477	160.353	163.543	166.186	160.289	163.56	73.1488	26.1275	-63.0204	-65.7326	40.3456	8.8202	-69.5112	-62.7689	11.8073	-1.52014
584	O=C(c1ccc(Nc2nc(-c3ccccc3)nc3ccccc23)cc1)N1NC(S)SC1c1cccc([N+](=O)[O-])c1	22	31.9338	416.943	7.41924	28	11	6	3	0	322.586	2064	9.28634	4.71724	4.34303	5.203	3.14716	3.07289	3.54608	33.2903	30.8806	23.7762	23.0733	20.4231	18.4094	262.394	228.67	232.664	226.157	208.874	157.801	145.414	147.479	153.831	159.132	156.686	153.588	153.409	157.278	52.2946	30.5731	19.6394	-72.7402	-121.121	-109.407	-1.52205	41.3744	8.80021	-3.23933
1086	Cc1c(Nc2csc(NC(=O)CCl)c2C#N)c(=O)n(-c2ccccc2)n1C	18.9	20.6201	323.282	6.77178	16	9	5	2	1	235.453	1582	8.93138	3.70567	3.76462	5.47566	3.69222	3.34686	2.91393	36.7907	31.5333	27.6782	23.74	18.8085	18.5	252.808	233.994	205.578	202.539	171.904	161.478	148.54	154.728	159.185	157.954	159.701	157.587	162.749	160.963	66.556	45.1123	-53.9029	-65.7546	-41.7048	-41.1303	35.993	16.0355	14.0627	3.15846
2892	Brc1ccc(-c2nnc(C34CC5CC(CC(C5)C3)C4)o2)cc1	10	18.3921	282.94	6.43369	11	4	2	1	1	97.8908	2054	6.17237	2.49686	1.79745	2.38758	2.41586	2.20854	1.84111	50.0976	28.2889	17.3588	12.9085	23.5283	15.2812	234.642	179.106	159.391	186.57	218.584	159.591	142.744	147.294	153.935	167.608	166.614	164.824	150.186	152.599	53.1315	44.4711	35.0681	36.4445	-46.5247	-96.7932	-94.0064	-33.8657	5.45866	-8.24985
2811	O=[N+]([O-])c1c(CCl)nc2sccn12	11	9.95651	57.7557	4.31859	8	7	3	2	1	153.592	1040	13.0617	0	4.12264	9.03483	2.94856	1.11523	3.10306	61.1765	43.8889	39.2143	42.037	6.33333	19.184	289.936	261.565	214.953	128.618	62.4429	163.562	152.778	156.762	161.723	167.383	161.463	169.103	182.058	159.627	23.2143	36.0344	-7.01576	-38.1262	-80.8456	2.59409	22.1455	0	3.19031	4.22491
1653	Nc1nc(COC(=O)c2cccs2)cs1	16	11.492	63.122	4.55053	10	6	2	2	0	124.451	1070	9.16908	4.32323	2.05263	5.41093	2.89175	3.59598	2.86842	46.5217	38.3333	27.8649	24.8824	36.4091	26.6842	268.404	208.793	212.248	204.827	231.873	157.762	145.517	149.172	156.144	158.141	158.759	157.245	154.857	156.023	13.02	2.47742	-23.1941	-28.4423	-4.87671	-6.67801	7.55009	-39.6982	2.63327	-2.52552
1276	Cc1cc(Nc2nc3ccccc3s2)nc(SCc2nc3ccccc3s2)n1	18	22.6559	201.652	6.33616	24	8	5	0	0	125.76	1748	8.07752	5	4.72549	2.92466	2.47323	2.51994	2.72976	40.6512	35.383	29.6279	27.2927	25.1892	24.7206	277.756	241.174	231.625	232.189	221.029	155.531	142.693	147.348	153.821	155.2	155.596	153.513	156.694	154.518	41.9538	0.107626	-42.5013	-67.0314	-23.5713	49.5477	53.3323	-69.8698	6.54786	1.99081
3024	Cc1cccc(NC(=S)NC(=O)c2cn(CCO)c3c(cc(Cl)c4ncccc43)c2=O)c1	10	24.9722	1277.81	8.31606	20	9	4	3	1	257.047	1780	8.74607	5.06667	4.65568	5.04013	3.66212	4.39621	3.67866	34.902	29.5185	24.9397	25.5323	23.2727	22.8901	255.974	234.593	222.18	197.388	191.346	158.951	146.088	150.889	154.011	157.034	154.574	159.569	161.6	160.198	48.8361	19.1323	31.4291	16.5141	-48.68	-28.9124	-19.8949	-17.8491	12.293	5.82199
1118	COc1ccccc1-c1cccc(-c2n[nH]c(=S)o2)c1	18	15.5444	112.958	5.42017	17	5	2	2	0	106.097	1034	8.82639	4.01212	3.80702	3.31553	2.50182	2.68322	2.88946	32.3125	29.3529	23.3065	20.6719	17.5818	20.2632	257.561	237.602	204.374	177.609	163.679	156.926	144.873	149.73	148.353	152.114	153.985	156.782	162.335	162.86	37.5868	2.94097	-23.2257	-51.9028	-36.3663	27.7292	42.8038	-14.5174	7.375	1.375
3685	O=[N+]([O-])c1ccc(-c2cn3nc(Cc4noc5ccccc45)sc3n2)cc1	8	21.9369	255.088	6.53486	23	9	5	3	0	230.92	1352	11.8538	9.05674	8.24806	6.07684	3.13029	4.32204	4.09446	35.5789	34.0238	25.8	23.481	29.9149	26.2093	274.414	239.882	216.25	232.343	248.244	158.849	147.075	148.284	154.691	159.264	161.139	158.917	158.814	156.852	39.8787	6.03786	-38.0569	-106.456	-27.9815	63.9982	16.5195	-25.1487	4.60388	-3.83934
2218	O=c1[nH]c(=S)[nH]c2nc3ccc(Cl)cc3cc12	13	13.6419	87.2201	4.99906	14	6	3	1	1	115.436	1158	10.5239	3.04444	0.577778	5.01894	3.4116	3.36204	2.21872	50.3478	35.84	30.1373	30.7111	38.1	28.6	299.664	258.465	232.384	235.113	208.508	156.474	146.947	148.115	152.988	158.925	156.4	156.311	161.392	161.798	11.1608	-4.08143	-8.5089	-21.1083	-8.26001	-14.8769	-14.727	8.26614	1.23251	-3.30624
2354	CCCCc1nc(Cl)c(-c2cc(-c3ccc(Br)s3)nc3c2C(=O)c2ccccc2-3)n1Cc1ccccc1	13	29.5818	705.957	7.86789	28	7	3	1	2	194.476	3084	7.41861	4.13077	3.34523	3.24126	2.82636	2.53632	2.55825	51.4	31.7538	25.0709	24.2177	28.3631	25.0933	269.515	230.538	242.984	260.222	240.043	154.853	140.569	146.493	152.639	154.361	153.865	149.883	149.613	152.907	75.154	89.6755	99.0122	65.1672	21.1237	-74.4856	-131.538	-122.523	16.6514	16.1608
1555	COc1ccc(-c2nn(-c3ccccc3)c(-c3ccc(-c4c(S(=O)(=O)c5ccc(Cl)cc5)c(-c5ccc(OC)cc5)nn4-c4ccccc4)cc3)c2S(=O)(=O)c2ccc(Cl)cc2)cc1	16	51.0344	1209.23	8.95404	52	14	4	6	2	464.332	3506	8.78099	5.4113	4.51333	4.64332	3.83916	3.44325	2.95548	35.06	33.8704	27.9559	26.937	22.6847	19.96	267.68	252.519	254.08	257.46	240.841	155.054	140.675	145.75	149.372	153.96	151.265	149.046	148.17	151.946	42.5702	54.5837	50.1913	70.0286	35.0068	-223.661	-322.348	22.2222	25.52	11.92
1113	Cc1cc(=O)oc2cc(Oc3nc(Nc4ccc(N5C(=O)C(CN6CCN(c7ccccn7)CC6)SC5c5ccc(Cl)cc5)cc4)nc(N(C)C)n3)ccc12	18	44.133	3065.69	9.73278	34	15	9	4	1	350.675	2720	8.2801	4.43783	4.36817	3.7707	2.98318	2.76895	2.71574	29.2473	28.51	22.19	19.404	18.9021	19.7754	239.548	215.455	191.638	190.627	191.947	161.474	146.937	156.379	156.133	160.541	159.07	160.409	161.144	156.783	133.799	65.2761	-46.2759	12.0647	-44.8494	-112.733	-81.5295	8.23929	18.9823	-2.51301
464	Cc1cc2nc(-c3ccc(C(=O)N[C@@H](Cc4c[nH]cn4)C(=O)N[C@@H](Cc4ccc(O)cc4)C(=O)O)cc3)[nH]c2cc1C	23	33.05	3628.24	9.63159	26	11	6	5	0	392.167	1760	8.55556	5.0904	5.32941	5.44676	3.79603	3.85734	4.31683	24.4444	26	18.9281	16.6011	18.1695	18.6118	230.602	203.216	175.789	192.253	186.302	162.123	147.941	151.923	156.578	161.279	164.063	159.959	160.759	159.553	68.6327	2.36651	-136.279	-48.9846	113.894	-52.6265	-38.8634	8.97377	12.7068	-13.2261
3647	CC(/C=C/c1ccccc1)=N\Nc1ccc(-c2nc3ccccc3[nH]2)cc1	8	21.2417	2161.36	8.67174	21	4	4	0	0	133.944	1044	7.02128	3.01087	3.06173	2.84988	2.66084	2.41244	2.15021	22.2128	25.02	17.59	15.03	13.1522	12.3086	241.188	202.745	183.034	202.784	163.054	158.715	145.219	148.292	156.097	161.935	159.73	152.229	160.333	162.604	42.9416	-4.02535	-48.8615	-35.7764	-3.51788	-31.5555	18.7836	51.3807	7.54278	-5.39113
4110	COc1ccccc1NC(=S)NC(=O)c1cn(CCO)c2c(cc(O)c3ncccc32)c1=O	4	25.5294	1314.1	8.37483	20	10	4	5	0	304.486	1620	9.55556	5.58824	5.16835	5.74502	3.71854	4.90681	4.17748	30.566	28.7143	24.3504	24.754	20.7647	20.7273	245.558	232.882	211.951	183.053	180.349	160.267	147.52	152.45	154.837	156.702	155.105	161.015	162.737	162.123	47.586	15.8186	32.1024	-37.1522	-56.076	-23.0151	18.6965	-18.0402	15.2282	8.19865
817	CCC1=NNC(=O)C1Oc1ccccc1	20	11.3422	84.6452	4.84393	6	4	2	2	0	124.861	634	8.14815	1.54054	0.107143	4.62449	3.52713	2.76577	1.85714	23.4815	25.3571	18.1429	16.3333	10.7838	5.07143	220.411	173.859	173.628	169.639	135.406	163.227	148.161	153.954	163.408	162.025	162.378	162.006	164.124	170.134	38	25	10	-46	-49	-64	-29	15	5.3594	0.632373
164	CC(=N/NC(=O)COc1ccc(Cl)cc1Cl)/C(=N\Nc1ccc(Cl)cc1)S(=O)(=O)c1ccccc1	28	26.8236	1117.6	8.2717	18	12	4	4	3	293.538	2422	8.98628	5.1649	4.65191	5.43588	4.039	4.28221	3.61695	44.8519	36.3571	30.5536	28.4643	22.873	22.9512	264.426	227.995	206.209	216.764	196.05	159.783	145.567	150.424	158.03	162.775	162.394	159.111	162.406	160.656	15.9877	-8.18519	2.97531	15.4074	-59.679	-66.8272	-10.7037	-36.4568	5.98765	-8.16667
2525	O=C1CS/C(=N/c2ccccc2)N1Nc1ccc([N+](=O)[O-])cc1[N+](=O)[O-]	12	20.1437	210.817	6.3065	12	11	5	5	0	362.142	1372	12.8769	6.86758	6.2924	9.78763	7.49409	5.64037	4.20511	37.0811	34.4103	27.3553	26.0132	24.8904	21.1579	259.189	223.059	233.895	237.058	195.72	162.886	151.6	151.678	160.694	166.193	161.966	157.962	162.289	160.58	36.2538	32.4052	-31.2057	-40.7312	-1.79588	25.7169	24.6884	18.0094	3.47699	-3.26735
1953	CCCc1nnc2sc3cc4c(C)cccc4c-3nn12	14.3	16.1302	147.926	5.68986	16	5	4	0	0	93.3645	1006	7.60131	2.90909	1.2381	2.74602	2.4109	2.46086	2.30159	29.5882	29.4054	24.56	20.5067	17.0455	12.381	245.822	223.701	195.336	199.729	199.013	160.09	145.755	151.359	155.881	159.102	161.532	159.025	154.17	158.624	72.3837	80.1638	28.0369	-40.4337	-68.3806	-59.2388	-87.148	-92.406	13.519	10.7785
3514	Nc1nc(-c2nnc(S)n2-c2ccccc2)cs1	8	14.1992	108.067	5.27054	16	7	5	0	0	95.8638	1162	9.02789	1.93694	1.3913	3.55051	3.01622	2.42626	2.511	43.037	35.4138	27.86	28.94	19.6486	15.6087	272.169	237.65	240.974	217.822	171.181	160.365	149.646	151.204	158.126	157.986	156.423	160.273	159.994	161.069	33.1096	18.0905	-3.67319	-23.0216	-41.4833	-59.8236	-32.4448	4.0991	6.73525	2.17558
1601	CCSc1ccc(OCc2nnc3sc(-c4ccc(C)cc4)nn23)cc1	16	20.4942	682.187	7.48082	20	7	4	1	0	126.035	1474	7.5202	4.53234	3.82184	2.86442	2.67251	2.84158	2.59323	33.5	31.3191	24.4091	20.3908	22.3433	22.7069	249.762	220.051	186.447	197.471	204.317	158.697	144.66	150.752	154.069	156.112	158.185	160.914	162	158.961	69.3039	45.3774	15.6768	14.1579	52.652	5.69605	-55.8852	-79.9385	10.9504	3.34711
1307	Cc1occc1-c1nnc2n1NC(c1ccc([N+](=O)[O-])o1)S2	17.14	17.7632	172.32	5.93781	15	10	5	4	0	216.392	1198	13.1111	7.975	9.73333	6.9804	3.71796	3.97454	5.23241	38.6452	36.0294	30.3833	27.7	22.6	26.3333	259.383	230.737	204.321	210.65	196.821	164.23	153.257	155.518	160.029	160.945	168.734	164.703	161.065	161.039	46.754	23.7967	-49.0606	-35.9387	-21.1518	-69.3241	55.1221	31.1668	6.57648	0.169615
3463	Cc1ccc(/C=C/S(=O)(=O)NC(=O)c2cccs2)cc1	9	15.3454	117.79	5.46205	11	6	1	3	0	217.886	1270	8.20875	4.02963	3.72973	6.60261	5.00469	3.93059	3.47773	38.4848	38.0294	24	24.0923	19.1556	21.8919	255.132	206.315	194.043	209.113	183.579	156.403	140.681	147.12	152.119	158.341	158.09	156.149	159.306	154.094	-4.86369	29.6824	-55.4613	58.3889	15.1352	-6.191	-35.3205	1.62269	1.77778	-5.88889
953	CCc1nnc2n1N=C1c3cccc(C)c3CC1S2	19.3	15.4231	116.014	5.39556	11	5	4	0	0	88.3645	970	7.3468	2.59524	0.833333	2.67771	2.15496	2.46032	2.12698	29.3939	29.2222	24.1974	20.0133	15.1905	9.64286	240.438	220.323	170.799	180.137	182.806	161.099	146.281	151.579	155.779	159.245	162.655	159.379	157.863	164.29	70.1384	62.2321	-31.0865	-94.2954	-38.7937	0.685542	-69.9654	-47.1169	12.843	7.48852
3033	CC(=O)N1N=C(c2ccc(Nc3cc(=O)oc4ccccc34)cc2)CC1c1ccccc1	10	25.5414	314.447	6.91397	22	6	3	3	0	239.528	1296	8.64151	3.73504	3.33019	4.51939	3.12782	3.18993	2.61583	24.4528	26.5614	19.6452	18.7266	15.6667	13.283	246.1	215.428	191.618	191.221	184.321	157.924	143.854	148.216	155.829	155.821	157.359	156.265	156.298	159.063	61.8594	11.9103	-72.7932	-35.7262	-26.104	-20.9715	-64.0424	24.6981	10.1463	-2.0769
942	CCCCCCCC/C=C\CCCCCCCC(=O)N1C(=O)CSC1c1ccc(Cl)cc1	19.9	23.5009	370613	13.9861	6	5	1	2	1	218.87	1734	3.97291	1.23098	1.0212	3.03986	2.18646	2.04004	1.91053	24.0833	22.6849	13.5455	13.4754	11.697	12.1053	200.766	148.781	145.335	140.559	136.583	162.191	143.449	152.203	161.17	161.397	160.866	161.709	162.387	162.377	58.9744	42.0535	51.6727	59.5576	17.5513	-1.62327	-16.8798	-22.9435	8.55633	2.38272
3247	N=c1sc(-c2ccc(F)cc2)nn1CC(=O)N1c2ccccc2Sc2ccc(Cl)cc21	10	24.9032	454.57	7.25075	23	9	4	1	2	245.679	1948	9.78875	5.12889	4.93708	5.45953	3.51188	3.16611	3.5355	43.2889	35.4286	29.9901	28.4356	25.27	30.3735	284.817	254.106	246.469	225.005	209.004	157.669	143.738	147.132	154.511	153.864	153.334	156.175	160.201	159.813	28.1922	-26.3634	-28.6857	-7.81464	-30.2956	-46.1244	49.2939	-0.737436	7.13778	-1.39556
2321	COc1ccc2cc(C(C)C(=O)Nc3ccc(S(=O)(=O)Nc4cc(C)on4)cc3)ccc2c1	13	25.9189	252.25	6.72434	21	9	3	5	0	298.883	1610	8.79365	3.43333	4.25079	5.33719	3.21483	3.04612	3.54985	28.75	31.322	22.4797	19.2681	16.1083	16.9619	237.286	219.391	177.953	190.762	172.934	160.08	144.787	151.078	153.677	157.829	160.611	156.058	158.875	160.206	49.0663	35.8951	-112.495	-64.4966	20.1927	2.89002	-62.7676	63.8452	11.7408	-6.48374
751	Cc1ccccc1Cn1c(-c2ccc(-n3cncn3)cc2)nc2c(F)cc(F)cc21	21	24.0867	389.424	7.06328	26	7	5	0	2	259.25	1252	10.2128	5.75676	5.03704	5.51596	3.27677	3.59359	3.91409	26.6383	28.1373	22.0583	20.0087	19.9459	18.7222	251.914	231.209	200.442	219.559	211.928	164.323	147.176	154.045	156.392	160.791	161.284	156.662	157.725	163.647	59.5328	6.40199	-43.2001	37.2707	42.6863	-28.6347	-42.0068	-81.8904	10.785	-1.66455
2682	CCCCCCCCCCCCCCCC1CC(=O)NCCCN(C)CCCCN(C)CCCN1C	11	25.853	6880.15	10.1173	0	5	4	1	0	208.056	1440	2.56	0.87574	0.920904	2.08056	1.76696	1.72559	1.7726	14.4	17.59	9.36462	8.71384	9.07692	8.92373	163.08	128.525	117.484	117.259	122.195	167.958	148.41	160.845	164.225	165.748	165.881	167.877	166.772	165.407	43.38	-45.938	-16.7108	40.8328	29.8864	-14.8756	-31.0752	-2.1416	7.36	-11.808
3654	Cc1ccc(-n2c(Sc3nnc(N)s3)nc3ccc(C)cc3c2=O)cc1	8	20.7415	225.685	6.37465	21	8	5	1	0	172.84	1484	8.65583	5.2827	3.26275	4.21561	3.63207	3.28903	3.09121	36.1951	32.9318	27.4337	25.6774	26.7975	19.0118	261.368	248.256	234.521	257.149	244.432	158.838	146.097	149.807	150.638	157.605	154.853	154.957	151.145	156.12	56.9957	32.3798	8.67698	26.7449	23.2407	-99.2949	-66.0906	-90.4515	11.7787	3.17728
3263	Cn1ncc2c(NCCc3ccc(Cl)cc3)ncnc21	10	15.6538	397.164	6.6775	15	6	5	0	1	99.4497	1052	7.63544	4.1513	4.59788	2.92499	2.28591	2.50355	2.67936	30.9412	28.0556	20.6111	16.6438	18.2979	19.5952	237.793	203.171	154.177	156.671	187.086	164.363	150.365	158.937	159.753	163.835	163.798	169.128	164.048	156.909	44.8694	11.9801	-27.3622	-48.5568	-35.2731	-21.2763	6.44863	18.025	6.82007	-1.57439
2318	Cc1ccc(N2C(=O)C(Cl)C2c2cc3ccccc3nc2Cl)cc1	13	19.2059	211.066	6.22764	16	5	2	1	2	142.622	1438	7.87394	3.93201	3.12037	3.7532	3.142	2.74418	2.9131	37.8421	30	25.8372	23.6154	23.8955	19.55	268.236	238.476	223.499	235.045	217.971	156.373	141.865	147.795	152.046	156.556	156.078	155.537	155.239	157.396	41.9327	5.22561	-32.0021	-10.5074	8.69837	-24.0412	-13.5063	-44.8087	9.13296	-2.45983
3879	O=C(O)c1cc(-c2ccc(Cl)cc2)[n+](C/C(=N/N=C2\N=C(c3ccccc3)CS2)c2ccccc2)c2ccccc12	6	32.5316	1609.85	8.79488	28	8	4	2	1	254.842	2081	8.0623	5.2422	4.7967	3.92065	3.09656	3.20938	2.97443	32.0154	29.5286	22.4452	21.7597	22.618	22.1703	265.059	232.938	219.072	223.268	227.385	155.594	141.915	145.341	152.015	154.151	155.553	154.825	154.211	153.782	50.8425	1.89441	-32.2881	-23.0876	44.5392	-21.5631	-100.076	-49.804	11.6166	-1.74249
3305	CCCCCCCC(O)CC/C=C\CCCCC(=O)N1NC(=O)C2CCCCC2C1=O	10	22.8628	203932	13.3569	0	6	2	4	0	296.917	1296	4.54795	1.25316	1.14103	4.06735	2.44697	2.28534	2.16132	17.7534	20.0811	11.6029	11.4515	10.038	9.4359	181.447	137.778	129.313	130.9	129.443	165.763	146.843	154.495	163.658	165.725	166.905	165.13	164.011	164.641	67.4376	67.7153	85.7609	24.7495	-33.7424	-83.754	-38.7761	-19.1034	9.42353	-0.132483
1524	N#Cc1ccccc1C(=O)OCc1csc(N)n1	16	13.5729	93.6428	5.12727	11	6	3	2	0	174.059	972	10.2387	5.63441	4.54023	6.44663	3.4369	4.05874	3.8113	36	32.8571	23.8776	22.9388	24.4839	25.931	263.758	227.093	206.63	201.233	223.022	159.176	145.824	149.123	154.259	157.949	163.172	158.821	157.23	157.324	20.611	2.9782	-5.49962	-31.7095	-7.88767	-23.0233	-2.5929	-21.5722	4.14129	-2.369
1690	N#Cc1c(-c2ccco2)[nH]c(=S)[nH]c1=O	16	11.4112	69.0012	4.63959	11	6	3	2	0	148.569	860	12.6222	0	0	7.42846	4.82287	3.50842	1	43	34.9524	29.1053	35.4848	8.09091	1	286.329	245.526	240.862	200.675	94.986	158.885	149.39	150.298	155.4	157.55	158.214	160.584	175.805	184.918	8.87111	-6.23556	3.41333	3.28	-25.4	-26.4533	-14.8622	17.2089	2.5225	-0.93
263	Cc1ccc(-n2nnc(C(=O)/C=C/c3ccc(C#N)cc3)c2C)cc1	26	19.2583	417.786	6.95126	17	5	4	1	0	196.694	996	8.68293	4.69231	4.39344	4.79743	3.42593	3.62051	3.38434	24.2927	26.2791	20.381	16.8495	18.3538	16.8852	247.74	223.895	185.179	196.585	199.147	159.146	144.565	149.105	153.195	161.081	160.694	158.995	159.244	158.379	64.1493	27.4563	-39.4117	-45.0446	-18.2225	-14.5925	-60.0863	-48.3117	10.0982	-5.08923
1175	CC1SC(S)NN1C(=O)c1ccc(-n2c(-c3ccccc3)nc3ccccc3c2=O)cc1	18	25.5294	354.206	7.03303	22	8	4	2	0	225.003	1720	8.22602	3.61832	4.02222	4.32697	3.02435	2.59858	2.93702	33.0769	30.2143	23.1488	23.187	16.7557	15.6609	257.417	225.775	224.194	223.313	190.025	157.153	143.953	148.682	154.348	157.412	155.521	150.566	152.402	159.916	64.5948	63.9384	55.986	-64.7859	-116.503	-101.902	25.5927	109.478	12.2899	3.49112
3096	Cc1cccc(OCc2ccccc2-c2nnc(-c3ccccc3)o2)c1	10	20.4942	299.025	6.65604	23	4	2	2	0	138.194	1036	8.09091	4.68421	3.98795	3.14078	2.82808	2.65863	2.74632	23.5455	26.0638	19.0543	17.567	18.3158	17	245.37	212.837	188.628	217.633	220.134	157.077	142.502	147.688	151.054	158.653	163.206	154.742	150.242	151.506	54.1157	24.5372	9.4876	1.2562	-51.6364	-35.9339	-18.4628	-46.314	8.22314	-1.43802
1157	Cc1ccc(C(=O)[C@H]2[C@@H]3C(=O)N(c4ccccc4)C(=O)[C@@H]3[C@@H]3C=CC=NN32)cc1	18	23.2868	402.119	7.06146	12	6	3	3	0	258.778	1186	8.83333	4.15517	3.57143	5.3912	4.0977	3.37548	3.0836	24.7083	26.6731	20.2937	20.0682	16.7672	15.2952	243.971	214.053	206.154	209.208	190.359	158.745	143.823	149.053	155.91	158.636	158.034	155.531	157.751	159.52	51.1736	8.07465	-7.78125	38.2708	21.0486	-49.6736	-102.84	-58.1094	12.9392	3.27908
3701	COc1cc2nc(Sc3nnc(N)s3)n(-c3ccc(Oc4ccccc4)cc3)c(=O)c2cc1OC	8	27.5533	761.539	7.8881	27	11	5	4	0	235.146	1896	9.83128	5.65344	5.82263	4.35455	3.34455	3.29826	3.37946	35.1111	32.8448	28.4528	28.1239	23.9683	24.3394	259.828	250.603	233.256	229.884	208.174	158.688	146	151.243	152.475	153.901	154.061	152.875	158.898	157.63	67.9366	11.4758	-20.6185	-65.7583	14.2013	16.9556	8.33196	-52.2463	15.4252	7.44719
443	Cc1cc(SCc2nnc(-c3ccccc3)s2)nc(SCc2nnc(-c3ccccc3)s2)n1	24	26.1915	242.274	6.68399	28	10	6	0	0	151.18	2164	7.91721	4.00244	4.55833	2.96432	2.67288	2.14049	2.48673	42.4314	36.2545	31.4444	30.7576	29.8901	27.3	277.4	242.474	237.051	242.166	211.953	155.717	142.369	146.066	151.262	155.897	154.445	151.882	155.879	155.005	53.8418	-8.73378	-50.0033	-79.6264	-21.9382	8.32928	90.9188	33.4846	7.09496	-0.00884275
3489	O=C(c1ccccc1)c1c(-c2ccccc2)cc2c3ccccc3ccn12	8.1	21.7062	280.382	6.6294	25	2	1	1	0	160.222	1030	7.77273	3.97222	2.63889	3.64141	3.11325	2.91975	2.5463	23.4091	26	19.9029	19.6952	17.1019	13.4815	263.092	235.968	228.064	232.698	217.35	152.503	138.976	141.885	148.573	149.577	151.996	149.28	148.473	151.9	33.2562	10.3595	29.3244	1.27066	-35.4298	-82.8843	-92.8554	-63.8099	10.8492	3.53616
2599	O=[N+]([O-])c1ccc(-c2nn3c(-c4cccc(-c5nnc6sc(-c7ccc([N+](=O)[O-])cc7)nn56)n4)nnc3s2)cc1	12	32.5601	609.876	7.79955	34	17	11	4	0	391.729	2146	14.0959	10.6746	11.4346	7.68096	3.80477	4.5363	4.54712	42.0784	38.2105	32.8952	29.8318	37.2619	34.1519	290.557	265.685	251.706	271.804	267.632	161.382	151.136	150.657	156.387	161.167	161.417	159.757	162.298	159.687	43.4195	22.4269	26.6248	-60.3698	-109.048	-77.7518	-61.6571	4.63864	5.37486	-3.82814
3412	COc1ccc(C2C3CCc4ccccc4C3=NN2c2nc(-c3ccccc3)cs2)cc1	9	25.8394	477.096	7.33087	23	5	3	1	0	147.948	1462	7.13535	4.50133	3.77778	2.68996	2.27346	2.47316	2.44004	26.5818	27.6167	20.097	19.7847	19.96	18.0317	248.964	217.942	197.729	203.338	215.996	156.419	141.913	147.285	152.549	154.984	156.926	155.89	152.875	152.795	58.7254	5.90358	-31.3866	-50.5317	-4.87328	8.68871	-8.63177	-67.618	14.243	3.35438
3408	COc1cc(/C=C/C(=O)N2CCC(C)CC2)cc2c1OCO2	9	17.068	321.166	6.56041	6	5	1	4	0	161.667	938	7.34884	3.98592	3.28788	3.75969	2.91358	3.0266	2.69697	21.814	24.2667	16.2871	13.6667	14.5775	15.3485	208.405	182.125	141.682	166.827	156.991	162.6	145.668	156.945	156.651	160.861	165.534	159.072	161.315	159.23	66.1082	34.8459	21.6717	17.887	-48.258	-45.3386	68.2353	9.59275	9.87074	-0.432666
1515	O=[N+]([O-])c1ccc(-c2csc(-c3cc(Cl)cc(Cl)c3Cl)n2)cc1	16	18.0224	165.884	5.9442	17	8	2	2	3	187.853	1896	10.642	7.39869	4.99099	6.26176	2.86887	4.33908	3.28245	63.2	41.1875	40.1803	42.8333	36.3824	38.1892	319.948	284.999	264.93	277.65	277.911	153.384	141.624	142.22	149.711	154.699	153.327	148.633	150.102	151.49	14.3867	-0.666667	-20.3462	-47.721	-12.0691	16.92	2.12889	-21.6578	1.82	-5.8
58	CCCCCC[C@@H](O)CC1C(CCC)=NOC1CCCCCCCC(=O)OC	32.5	19.9369	2177.61	8.7156	0	5	1	4	0	218.139	1176	3.94366	0.919192	0.880208	3.07238	2.0025	1.97012	1.94126	16.5634	19.0704	10.2328	10.2629	9.19697	8.80208	171.639	130.206	130.188	124.556	120.94	166.49	146.582	156.135	164.146	164.655	164.443	164.962	165.466	165.824	65.831	29.7867	-22.7685	-49.9734	-24.8792	-78.0559	-49.2303	-47.4999	8.8169	-0.31343
757	O=c1c(/C=N/c2ccc(Cl)cc2)coc2ccccc12	21	15.6538	210.575	6.04299	16	4	1	2	1	138.728	1052	9.4535	5.33618	4.83165	4.62425	3.39784	3.53931	3.20844	35.0667	30.1875	24.3016	20.9825	21.2821	23.2727	275.572	233.441	212.856	217.757	212.148	154.273	140.416	144.493	152.09	158.835	153.761	152.801	156.725	152.853	19.8416	-9.68203	-0.763128	-23.064	-7.36071	-1.7476	-24.5552	-40.5763	3.48	-4.8
3803	CSc1ccc(C2=NN(c3ccccc3)C(c3cn(-c4ccccc4)nc3-c3ccc(Cl)cc3)C2)cc1	7	29.5248	499.336	7.52161	29	6	4	0	1	162.259	1882	6.93628	4.48541	3.70712	2.61708	2.41803	2.5442	2.47326	30.3548	28.5075	21.1268	19.9054	20.5084	18.3077	257.744	223.395	209.452	221.042	222.793	156.033	142.425	146.555	153.483	155.837	157.393	152.82	152.072	154.265	67.4382	27.1293	-28.5027	-18.5658	15.5762	4.26746	-50.4507	-91.2217	13.6152	-0.0835068
2038	COc1ccc(-[n+]2noc(O)c2Cn2c(-c3ccc(Cl)c(Cl)c3)nc3ccccc32)cc1	14	25.4605	377.352	7.09633	26	9	4	3	2	183.927	1811	9.24918	5.73576	4.79532	3.75362	3.25327	3.23239	3.26841	36.9592	31.2264	28.3238	22.3913	24.5966	24.0439	263.259	242.858	218.699	219.257	221.081	159.133	146.378	151.457	155.117	160.097	156.494	157.084	157.823	159.194	56.2126	15.7748	-48.1217	-88.9869	43.8458	73.1877	-20.6649	-121.608	12.8084	-0.608913
3079	N#Cc1ccc(Nc2nc(Oc3ccnc4ccccc34)nc(N3CCOCC3)n2)cc1C(F)(F)F	10	28.5377	287.123	6.94085	22	12	7	2	3	394.562	1596	12.1852	8.77358	7.38053	7.30671	4.01335	4.53931	3.62402	29.5556	29.9138	22.9008	22.8952	25.1132	23.2566	247.982	220.009	203.329	217.12	223.666	169.108	150.051	161.888	160.533	166.574	171.958	167.571	167.984	157.612	65.2401	83.1454	27.3635	12.4787	-39.1495	-156.722	-47.1385	-16.2647	4.95199	2.88203
3811	O=C1NC(=S)/C(=C/c2ccc(Cl)cc2)S1	7	11.6014	74.7595	4.71974	6	5	1	1	1	99.0502	1280	8.49971	3.91033	3.41564	4.71668	3.20225	3.74452	4.07608	60.9524	40.1364	34.65	29	38.5263	62.7778	313.281	254.413	249.39	250.856	210.242	150.331	140.048	141.318	145.872	151.006	149.539	148.511	159.152	168.39	1.66418	-30.8513	2.11315	1.21055	11.9445	-3.24616	-10.0503	-6.96951	-0.0589569	-4.00454
2742	Cc1ccc(NS(=O)(=O)Cc2nnc(CS(=O)(=O)c3c[nH]nc3S(=O)(=O)c3ccc(C)cc3)s2)cc1	11	28.5242	1506.51	8.59848	22	15	5	6	0	425.957	2430	9.53996	4.26901	6.34653	7.47294	3.93597	4.03128	5.8104	42.6316	43.9333	32.4724	31.9496	29.7281	26.5149	253.485	226.66	202.607	223.502	204.683	160.424	144.023	150.094	154.053	159.265	162.391	157.017	160.567	161.223	-11.4444	56.9753	-49.358	40.7901	102.16	-5.30864	-156.296	14.5802	6.57618	-4.8144
628	O=c1cc(COc2cccc(OCc3cc(=O)oc4ccc(Cl)cc34)c2)c2cc(Cl)ccc2o1	22	27.1459	264.856	6.80296	26	8	0	6	2	252.455	1914	10.5042	6.1256	5.82456	5.0491	3.18189	3.31996	3.41157	38.28	31.7778	25.5856	23.2895	24.8043	23.1789	276.301	243.948	203.907	218.184	232.027	154.087	140.224	145.577	149.946	152.354	157.078	154.152	151.03	153.204	43.1783	-20.4459	-61.4499	-33.6711	-29.5877	2.15358	30.9768	-50.7284	3.9424	-4.1872
83	CC(=O)OC[C@H]1CN(c2ccc(N3CCN(C(=O)OCC4=C(C(=O)O)N5C(=O)[C@@H](NC(=O)Cc6ccccc6)C5SC4)CC3)c(F)c2)C(=O)O1	31	39.3901	35120.5	12.076	12	17	5	10	1	582.337	2444	10.0291	5.79259	5.46266	6.93258	3.94163	4.01919	4.53587	29.0952	28.8202	21.3251	20.2356	20.9778	22.0328	228.419	202.162	175.353	168.657	188.297	164.203	147.941	157.188	159.547	161.017	163.828	166.428	163.244	160.596	109.898	31.2003	-132.023	-118.273	-59.1353	52.5898	82.3076	-38.2993	14.9796	-5.12245
2612	Clc1ccccc1C1=NN=C2C(Cc3ccccc3)=Nc3ccccc3N2C1	12	22.4942	314.97	6.7821	18	5	4	0	1	128.533	1330	7.85789	4.58038	3.30643	2.85629	2.65662	2.67682	2.47784	29.5556	28.0612	22.3019	21.0278	21.0213	19.2737	261.034	227.647	210.496	213.607	229.063	157.178	143.311	147.814	154.742	158.405	159.293	158.507	153.667	152.466	45.2487	5.96027	-0.13843	-21.0646	-2.60046	-24.2557	-85.0784	-78.9851	8.76	-0.36
2071	CCCCCCC/C=N/Nc1cc(C(F)(F)F)nc2c(C(F)(F)F)cccc12	14	21.2151	5554.26	9.65194	10	9	3	0	6	483.764	1338	11.0612	8.06122	2.73684	9.87273	5.17961	9.90434	3.38048	27.3061	26.32	18.4912	19.0603	21.8061	14.8816	214.118	177.874	175.084	168.264	154.28	178.519	151.708	165.532	166.105	172.432	172.14	176.627	188.888	169.533	93.0816	259.265	239.735	172.041	177.245	119.98	145.429	-85.2245	5.5177	9.8713
4082	C/C(=N\N=C1\NC(=O)/C(=C/c2ccc(F)cc2)S1)c1[nH]c(-c2ccccc2)nc1C	4	23.6103	386.523	7.0558	17	8	5	1	1	246.698	1456	9.25926	4.58608	5.1746	5.13954	3.13852	3.15249	3.91894	30.3333	29.5882	23.4021	21.0309	21.3956	18.4524	251.743	220.11	203.381	203.881	190.697	161.886	146.755	150.901	157.843	162.923	160.061	159.402	160.712	166.169	61.4913	16.7843	-84.0276	-70.273	12.463	-19.6256	-22.5843	46.4097	9.6875	-3.375
4383	CCNC(=S)N/N=C/c1nc2ccc(I)cc2c(=O)n1-c1ccccc1	0	19.925	609.969	7.36892	16	8	5	1	1	163.925	4038	8.13021	4.12051	3.1088	3.90298	3.32993	2.84071	2.63976	96.1429	34.7045	29.7444	30.5765	31.7436	35.013	266.848	224.984	227.504	220.729	220.967	159.505	148.017	153.21	158.686	157.76	159.153	158.843	157.248	157.368	49.9277	42.7717	70.0725	29.6008	-49.7566	-64.4255	-68.297	-55.9961	8.87755	6.08163
3060	Cc1ccc(-c2cc(-c3c(-c4ccccc4)[nH]c4ccc(C)cc34)c3c(=O)[nH]cnc3n2)cc1	10	27.5414	410.759	7.24178	31	5	4	1	0	201.611	1326	8.10714	5.14286	3.67429	3.6002	3.17366	3.14881	3.07429	23.6786	26.1967	21.0078	19.338	19.4881	16.5314	252.776	240.911	234.314	247.013	221.588	156.708	143.019	146.959	148.799	154.056	152.362	149.641	152.726	156.818	69.5306	45.7755	24.0408	74.0408	39.0204	-29	-117.429	-190.571	16.5153	5.70918
3041	Cc1cccc(N2C(=O)C(Cl)C2c2cc3ccccc3nc2S)c1	10	19.2059	206.684	6.20666	16	5	2	1	1	143.366	1406	7.66445	3.27426	2.8547	3.67604	2.9517	2.74532	2.58632	36.0513	29.5238	25.1932	23.0851	21.3418	18.5692	264.534	236.737	223.684	218.251	198.259	155.546	141.143	146.897	151.575	154.328	154.477	152.669	156.482	156.56	47.8478	5.71503	-34.5477	-22.3146	-21.0373	-14.5694	-33.7348	-3.39791	10.3136	-1.55621
1095	Cc1ccc(/N=N/c2c(N)nn3c(-c4ccco4)cc(-c4ccco4)nc23)cc1	18.5	23.3107	513.812	7.30657	25	8	6	2	0	169.5	1194	10	6.37634	4.22222	3.76667	3.85511	3.82915	3.07037	26.5333	28.7347	23	22.6889	22.129	16.8889	250.752	221.858	229.762	236.766	212.61	161.327	148.841	151.953	160.298	162.334	159.622	158.362	163.837	163.041	65.9012	41.6296	9.88889	46.2222	37.4938	-27.3951	-144.407	-130.889	11.7931	1.95407
2884	CCSc1ccc(OCc2nnc3sc(-c4ccccc4Cl)nn23)cc1	10	20.4537	719.571	7.53417	20	8	4	1	1	120.845	1724	8.06083	4.87067	4.12179	2.94745	2.68243	2.9025	2.64589	42.0488	34.5455	28.6098	29.1733	25.7541	26.4038	267.725	232.037	207.021	201.106	214.548	157.788	144.52	149.764	155.192	154.713	156.269	161.834	162.008	157.731	56.2223	40.4998	26.9587	0.600165	44.7489	14.1309	-60.4804	-60.4874	8.99822	4.81083
3450	NC1=Nc2nc3ccccc3n2C2(NC(=O)CC(=O)N2)N1	9	17.1158	137.507	5.66561	9	9	7	2	0	202.229	914	11.125	2.37736	1.23529	6.31966	4.9424	3.84906	3.0098	28.5625	29.8	23.4615	24.575	12.6604	7.73529	236.253	211.594	203.65	182.173	141.075	168.913	157.691	161.925	169.62	167.654	169.665	164.677	168.019	170.909	32.1719	25.4219	-66.0312	56.625	-131.469	0.4375	-78.4219	42.6562	6.88574	5.03418
1376	O=c1c2cc([N+](=O)[O-])ccc2nc(SC/C=C/c2ccccc2)n1Cc1ccccc1	17	24.1676	1154.78	8.18306	22	7	3	3	0	281.142	1478	8.84889	4.63399	4.2044	5.62285	4.24423	3.03855	2.95353	29.56	29.1698	22.2252	21.1466	20.6961	18.7736	254.618	221.73	218.882	210.647	213.598	157.078	143.209	146.954	151.801	159.413	154.83	156.127	152.2	155.923	42.6076	23.5895	12.9006	-37.6852	15.1532	58.1108	-7.42009	-41.3847	6.8828	-2.4464
2951	Cc1ccccc1N1C(=O)CSC1c1cc2ccccc2nc1Cl	10	19.137	168.203	6.00064	16	5	2	1	1	142.703	1406	7.53973	3.43259	2.95767	3.65906	2.82322	2.51267	2.64658	36.0513	30.7143	25.9545	26.3474	19.9067	16.4603	264.534	240.945	226.842	195.853	195.545	155.546	141.193	146.761	150.622	155.334	151.181	156.523	155.927	158.777	46.611	12.7037	-52.7094	-40.1634	-18.6991	-2.71669	12.6558	-28.1124	9.85207	1.85799
1739	CCOc1ccc(S(=O)(=O)N2CCN(c3ccccc3)CC2)cc1-c1nc2ncccc2c(=O)[nH]1	15.5	27.679	419.297	7.29134	22	10	5	4	0	298.077	1682	8.47407	4.27664	4.97744	4.96795	3.30881	3.01829	4.60032	28.0333	30.8906	22.2345	20.5909	20.4218	21.5714	234.065	210.082	185.911	175.989	182.181	161.636	146.015	155.678	157.687	158.662	158.63	161.409	161.001	162.576	45.0131	73.9196	31.9809	-84.4943	-38.8617	139.179	23.5485	-144.155	13.8378	2.21083
3556	O=C1NC(c2ccc(Cl)cc2)NC2C1CNN2c1ccc([N+](=O)[O-])cc1[N+](=O)[O-]	8	22.9602	282.846	6.70961	12	12	6	5	1	372.366	1530	11.4001	5.54994	6.37963	8.46287	5.58155	4.04159	5.4977	34.7727	31.2766	22.6228	21.1148	20.8586	23.5714	243.451	206.168	186.635	184.849	185.478	165.73	153.922	155.437	161.928	167.394	165.398	164.801	164.729	166.228	28.8176	11.7388	-19.452	-25.7959	37.8235	64.2158	-43.0045	-6.88022	4.64824	-6.72469
3793	Cc1cccc2sc(Nc3ncccc3C(=O)N3CCN(CCO)CC3)nc12	7	21.9369	363.153	6.92444	15	8	5	2	0	201.615	1372	7.2244	4.01634	3.71685	3.95323	2.79252	2.68174	3.08732	26.902	27.2778	19.4333	17.9846	17.598	18.7634	224.145	195.088	164.134	177.616	181.986	163.204	148.226	157.737	159.62	161.492	163.477	165.126	162.028	158.035	54.452	9.00671	7.78393	-6.56487	5.8372	-16.0524	-5.50545	-59.6785	12	1.77778
3093	O=c1c2cc(I)ccc2nc(Cc2ccccc2Nc2ccccc2)n1NC1=NNC(c2ccccc2O)C1	10	31.1578	709.039	7.92489	28	9	6	2	1	252.634	4336	8.141	4.89182	4.94976	3.9474	2.98891	2.89849	2.89938	67.75	30.7971	24.1111	22.5157	21.5808	24.4	256.758	214.94	201.218	205.787	202.16	158.974	146.627	148.998	157.361	160.414	160.595	159.287	158.628	157.289	48.2495	-4.71845	-26.8523	-11.5212	8.49994	-30.576	-11.5213	-2.30817	10.3684	-6.22217
67	COc1ccc(C(=O)/C=C/c2ccc(OCc3nnc(-c4ccccc4O)o3)c(OC)c2)cc1	32	26.22	699.724	7.77446	23	8	2	6	0	264.028	1440	9.60714	5.58	4.94845	4.71478	3.32227	3.54278	3.30126	25.7143	27.3051	22.1909	19.4538	19	17.8969	240.719	225.06	181.056	186.858	192.698	158.929	144.336	150.968	152.513	155.751	159.947	158.961	158.565	158.348	69.9592	0.530612	-54.3061	-69.8571	-1.69388	40.102	15.3061	-39.5102	12.9592	-3.04082
655	Cc1ccccc1OCc1ccccc1-c1nc(-c2cc(Cl)sc2S(N)(=O)=O)cs1	22	23.7662	618.838	7.52646	22	9	2	3	1	226.256	2120	8.14762	4.42989	3.95508	4.81396	2.63195	2.58178	2.77496	45.1064	39.08	29.7938	29.3173	24.6548	26.2128	273.455	245.099	215.156	214.877	240.048	154.793	140.481	145.612	148.849	151.53	155.625	154.499	146.792	148.7	9.12734	42.8736	-82.7153	-12.4626	17.6767	8.30528	-21.8279	-13.0922	8.61114	0.661838
1104	O=c1c2c3c(sc2nc2sc(-c4ccccc4)nn12)CCCC3	18	18.9182	229.236	6.26766	18	6	3	1	0	136.062	1348	8.35802	3.91156	3.42105	3.77951	3.52275	3.12056	2.596	37.4444	33.625	25.875	29.7531	24.4286	22.2895	270.66	227.552	223.798	228.533	225.801	155.368	141.72	146.436	152.598	153.097	158.685	160.943	154.469	146.857	46.8162	52.1166	104.981	44.8148	-65.7435	-134.802	-107.085	-58.4005	8.57716	8.7392
442	Cc1ccc(OCc2ccccc2-c2nc(CN3CCN(C(c4ccccc4)c4ccc(Cl)cc4)CC3)cs2)cc1	24	32.5435	668.173	7.91553	29	6	3	1	1	181.759	2050	6.02733	2.39587	2.60205	2.42345	2.16494	1.96401	2.02036	27.3333	26.475	18.4862	16.1244	15.0047	16.2065	239.027	204.611	186.171	184.225	166.201	157.596	142.321	150.654	153.602	156.602	157.081	154.293	158.043	159.966	57.7394	-50.494	-47.0095	6.9781	-35.0648	-67.8013	7.20689	12.9627	12.552	-7.3888
3535	COc1ccc(C(=O)CSc2nc3sc4c(c3c(=O)n2N)CCCC4)cc1	8	21.2583	1097.92	7.99443	15	8	3	3	0	215.34	1554	8.01932	4.41905	4.26667	4.68131	3.48733	3.89572	3.08862	33.7826	31.0408	25.9143	25.2897	24.8857	20.2571	243.697	222.859	183.25	183.689	206.688	159.288	144.893	150.55	152.563	155.288	160.077	161.99	158.829	157.06	63.7736	39.2642	-6.90065	-61.7505	-28.6219	-36.9288	-71.9128	31.2562	13.4787	4.37571
4373	O=c1[nH][nH]c2c1C(c1ccccc1)CC(c1ccc(F)cc1)=C2	0	18.4014	198.163	6.122	17	4	2	1	1	203.972	942	8.73684	3.90123	3.65079	5.36769	3.0448	3.3546	3.42769	24.7895	26.4146	18.6667	17.0103	15.6667	13.7143	247.188	215.654	188.603	187.264	174.284	160.377	144.796	146.854	152.764	155.082	157.343	158.957	163.296	165.241	25.7119	-15.3629	-48.3518	-31.8587	29.59	-9.29917	-57.4626	7.31856	6.1946	-3.52424
2369	Cc1c(C(=O)OCC#CCN2CCN(c3cc(C4CC4)ccc3C#N)CC2)sc2ncnc(N3CCOCC3)c12	13	31.6746	12218.4	10.797	15	10	6	3	0	264.448	1854	7.56173	2.70513	2.78222	3.67289	2.73328	2.54625	2.63006	25.75	26.961	20.3018	17.8624	14.022	13.36	227.861	205.909	173.878	183.99	148.914	161.838	145.899	157.756	156.755	155.899	162.014	156.066	163.418	166.926	91.9346	-2.52941	-6.65732	-15.3233	-91.0891	-61.0334	9.18433	-27.3606	16.8002	1.2909
1909	Cc1ccc(C2C(C#N)=C(N)OC3=C2CNc2c3cccc2[N+](=O)[O-])cc1	15	21.2868	225.473	6.41145	12	7	4	3	0	269.556	1124	9.86047	4.21212	4.35897	6.26873	4.08959	3.12458	4.06125	26.1395	27.6739	22.5882	20.2727	15.6667	16.7821	246.282	239.813	202.132	188.796	172.605	160.369	147.109	148.06	150.04	157.543	157.279	160.936	163.161	160.395	51.8572	43.1493	0.378042	-9.64251	-53.7112	-65.748	25.2185	-3.89832	13.3483	3.1179
2195	CCOC(=O)C1CCC(c2ccc3c(c2)CCC3)=NO1	13.38	15.5444	172.689	5.84464	6	4	1	3	0	146.667	836	7.02564	2.41791	2.42857	3.76068	2.26984	2.39801	2.48115	21.4359	23.9024	15.5052	15.5176	12.1642	11.3393	211.778	170.998	154.056	154.658	142.089	161.788	144.219	152.07	159.923	159.331	161.633	161.923	164.149	165.215	64.6187	36.0592	-22.879	-72.8218	-51.407	-7.70546	-2.21039	-2.36949	8.14201	0.248521
339	Clc1ccc(-c2csc(Nc3cc(-c4ccc(Cl)cc4)n(-c4nc(-c5ccc(Cl)cc5)cs4)n3)n2)cc1	25	29.8245	567.069	7.64881	33	10	5	0	3	152.856	2612	8.4095	5.93967	5.71568	2.88408	2.67981	2.71662	2.73147	49.283	36.4483	28.8661	28.8919	37.7629	31.8283	299.138	251.225	242.186	253.476	267.834	153.914	142.296	144.914	152.904	154.258	155.303	154.546	153.668	150.787	33.9447	-10.2943	-22.9619	-6.95882	22.3429	-25.5685	-18.6892	-40.8799	5.00748	-6.87754
1696	c1ccc(-c2csc(N3N=C4c5ccccc5CCC4C3c3cccs3)n2)cc1	16	23.7181	390.035	7.03095	22	5	3	0	0	121.34	1542	6.89352	3.86928	3.30526	2.52792	2.18202	2.2664	2.23041	32.125	30.5849	21.2185	23.3607	20.951	18.9684	264.135	217.079	216.133	216.061	219.957	154.268	140.539	144.516	152.537	154.096	154.853	153.543	151.823	149.835	39.8673	14.8549	-3.00309	-38.6049	-23.0617	-26.1852	-18.2037	-52.7438	10.3008	2.38672
2007	CSc1nc2c(c(=O)n1C)C(c1ccc([N+](=O)[O-])cc1)C1=C(CC(C)(C)CC1=O)N2	14	23.7949	303.191	6.81298	12	9	4	4	0	320.288	1486	8.77778	3.25571	3.30749	6.15939	3.46549	3.01809	3.02598	28.5769	28.2364	22.5969	18.2674	17.1918	18.8372	231.025	230.311	206.181	190.131	176.81	162.019	146.68	152.472	150.315	162.863	156.752	159.338	161.055	156.796	100.769	93.574	18.1085	16.4011	-153.832	-87.0296	-141.103	10.835	18.1302	2.27811
2315	Clc1ccc(-c2coc(Nc3cc(-c4ccc(Cl)cc4)n(-c4nc(-c5ccc(Cl)cc5)cs4)n3)n2)cc1	13	29.8245	567.069	7.64881	33	10	5	1	3	164.686	2420	9.08036	6.6239	6.41601	3.10728	2.87944	2.98104	3.00993	45.6604	34.7931	27.9375	27.0901	33.4742	29.7273	291.961	247.17	233.799	246.392	257.451	155.388	143.561	146.824	153.955	155.676	157.967	156.533	155.696	153.164	38.7686	-1.01875	-21.4601	15.039	12.2763	-28.6468	-18.8008	-50.755	5.00748	-6.87754
934	O=S(=O)(Cl)c1ccc(NC(=S)NCc2ccccc2)cc1	20	16.0809	285.701	6.39688	12	7	2	2	1	176.457	1544	7.48511	3.48309	3.92593	5.18992	2.85709	2.67762	3.29206	45.4118	41.0286	23.6389	21.2297	26.087	32.9268	263.243	211.101	182.675	207.426	202.223	157.507	143.783	149.331	153.093	160.585	161.673	157.004	155.735	152.956	-9.37622	-24.5885	-7.16938	-7.63715	1.13905	14.5747	8.71263	1.81597	-0.365917	-6.59256
1927	C=C1C(=O)[C@@]23CC[C@H](C(=C)C)[C@@](C)(CCC(=O)OC(C)C)[C@@H]2CC[C@@H]1C3	15	20.3559	613.368	7.37448	0	3	0	3	0	215.347	1054	4.66667	1.8503	1.61806	3.58912	2.05044	2.70243	3.09934	17.5667	20.3226	14.4222	11.411	11.3892	10.5347	190.782	182.955	132.593	110.945	133.891	162.664	142.945	151.133	153.217	158.113	160.362	167.582	163.267	165.092	80.5422	35.0711	-86.1333	-119.484	-30.4178	76.6311	-3.19111	-85.6933	22.5	3.75
3182	Nc1nc(COC(=O)Cc2ccccc2OC(F)(F)F)cs1	10	16.9186	153.104	5.81957	11	9	2	3	3	341.871	1268	13.2862	9.37879	5.69369	10.3597	5.668	8.94006	3.86678	38.4242	33.7647	23.1667	23.0781	26.75	24.6757	245.799	213.126	188.919	177.57	192.299	172.098	150.614	163.185	158.089	160.427	170.468	179.972	172.283	161.225	35.9291	74.7059	-37.689	9.20243	16.7616	-152.83	41.4523	-8.24324	-1.10744	0.0909091
3846	CC([C@H]1CC[C@@H]2[C@@H]3CC[C@@H]4C[C@@H](N(C)C(=O)c5ccccc5)CC[C@]4(C)[C@H]3CC[C@]12C)N(C)C	6	27.2053	945.192	8.07516	6	3	2	1	0	190.375	1326	3.65854	0.939297	1.01887	2.32165	1.61289	1.62877	1.69706	16.1707	19.814	13.4789	10.3175	8.09265	8.3434	186.879	177.848	119.901	118.654	117.498	163.593	144.37	153.572	153.898	159.083	164.645	164.585	164.562	165.346	83.5961	12.2017	-73.4355	-68.6365	1.68174	10.8269	37.2647	14.5509	29.1713	-5.06603
2160	O=C1NC(c2ccccc2)(c2ccccc2)C(=O)N1CN1CCOCC1	14	20.4592	326.634	6.74435	12	6	3	3	0	209.424	1080	7.74468	2.91525	1.94681	4.45582	3.72421	3.244	2.14362	22.9787	25.34	18.5	17.6231	13.661	12.1277	223.451	198.576	188.444	183.08	154.474	161.899	146.765	155.93	156.855	161.078	161.199	159.257	163.901	158.272	42.6437	5.24445	36.5115	57.7673	-43.2078	-201.942	-108.212	-36.234	12.0502	3.64418
4421	Cc1ccc(NC(=S)Nc2ccc(C(=O)NCC(=O)O)cc2)cc1	0	18.1842	173.525	6.03179	12	7	3	3	0	229.125	1224	8.15718	4.08466	3.70621	5.58841	3.21078	3.43656	3.25534	29.8537	27.119	19.7442	18.2697	19.0317	19.2034	236.685	200.064	183.343	195.047	190.9	160.89	148.316	151.779	156.682	161.221	160.301	158.082	157.564	158.993	29.6953	-15.8196	-66.6064	-18.675	58.4179	11.3481	-26.0641	-17.7721	3.79239	-8.05651
474	CSc1nc2c(c(=O)[nH]1)C(c1ccc([N+](=O)[O-])cc1)C1=C(CC(C)(C)CC1=O)N2[C@@H]1O[C@H](COC(C)=O)[C@H](OC(C)=O)[C@H](OC(C)=O)[C@H]1OC(C)=O	23	40.6219	1139.98	8.68743	12	18	4	13	0	627.788	2546	9.96049	5.07527	4.63365	6.97542	3.99855	3.77907	3.79776	28.2889	28.1383	22.2443	21.2582	20.3275	20.0071	221.821	214.253	209.239	204.882	189.817	163.345	146.865	155.142	156.659	159.626	158.262	158.239	160.068	159.075	179.532	96.6968	-127.829	117.023	-24.0535	-192.859	-201.118	-123.966	25.4444	16.1111
1875	Cn1ncc2c(NCc3cccc(F)c3)ncnc21	15	14.9467	218.083	6.02673	15	6	5	0	1	157.389	806	9.80645	6.51282	5.02381	5.07706	2.90222	3.61396	3.39683	26	27.697	20.8254	17.3077	20.8205	17.119	234.592	207.877	163.141	172.756	212.267	168.616	152.433	161.339	161.787	168.448	166.778	171.798	157.686	169.559	41.7242	1.90947	-49.3153	-53.8169	-36.5775	-16.2487	34.7034	10.2092	6.45578	-1.40375
3069	O=C(Nc1ccc([N+](=O)[O-])cc1)c1cn(CCO)c2c(cc(Cl)c3ncccc32)c1=O	10	24.2246	740.489	7.73871	20	10	4	5	1	354.116	1576	11.1653	5.6859	5.81176	7.69818	4.21509	4.7992	4.83554	34.2609	30.7551	25.8585	25.4196	22.1058	21.4118	259.115	239.443	223.609	203.934	188.13	160.366	147.357	150.443	155.519	157.933	154.679	159.017	162.714	161.413	35.5481	22.5517	15.2721	-52.6318	-89.6121	-66.0374	-28.0343	16.0336	9.61484	3.19282
2186	Cc1ccc(-c2nn(-c3ccccc3)cc2-c2nnc(-c3ccccc3)o2)cc1	13.6	23.2417	301.898	6.7748	28	5	4	1	0	147.472	1142	8.51064	5.77778	4.37755	3.13771	3.1747	3.15247	2.83787	24.2979	26.9804	20.11	19.5673	21.2333	17.9898	253.48	221.194	216.136	242.455	233.812	157.489	144.054	147.836	152.645	160.626	160.204	153.391	154.068	155.616	62.5853	47.2653	31.4418	47.9846	11.4255	-66.966	-112.522	-126.734	10.3726	0.414215
3971	Sc1nnc(Sc2nnc(-c3ccccc3)n2-c2ccccc2)n1-c1ccccc1	5	23.8679	279.637	6.73211	28	8	6	0	0	141.419	1614	8.64681	5.44444	4.82016	3.07433	2.97622	2.89041	2.83554	35.087	31.92	27.0928	28.8763	23.7158	20.9072	271.047	237.907	249.457	248.168	229.673	157.18	145.117	148.144	153.622	157.278	157.532	153.31	156.125	157.899	49.8997	9.82646	7.16834	22.3406	-2.31877	-35.6336	-56.7115	-91.0764	10.0775	4.79395
1172	O=C1O[C@@H](CNS(=O)(=O)c2ccc(F)cc2)CN1c1ccc(N2CCNCC2)c(F)c1	18	24.4643	316.654	6.88921	12	11	4	4	2	389.799	1612	9.74423	5.12903	4.89272	7.35471	5.09749	4.00139	3.68777	30.4151	32.2143	20.2148	19.0292	19.3656	21.0345	225.356	187.337	169.348	162.765	172.541	168.024	149.307	159.277	163.795	164.201	165.098	169.491	167.745	163.964	28.8448	50.5704	-19.6723	-89.3188	-46.2201	54.5497	28.7879	-39.1449	5.82058	-5.60342
3799	O=c1c2cc(I)ccc2nc(Cc2ccccc2Nc2ccccc2)n1NC1=NNC(c2ccccc2Cl)C1	7	31.1578	709.039	7.92489	28	9	6	1	2	217.445	4560	7.883	4.79411	4.80327	3.4515	2.97363	2.81678	2.82137	72.381	31.9265	25.4834	24.2516	22.1024	25.3129	264.905	219.717	209.232	212.428	203.841	158.288	145.953	148.832	157.213	160.07	159.652	158.357	158.283	156.782	49.5918	-8.03047	-20.5153	7.03618	17.9626	-44.2806	-9.69773	-15.4995	9.24691	-6.08642
2055	CN(C)c1ccc(/C=N/NC(=O)c2cc(Cl)c[nH]2)cc1	14	15.2059	116.906	5.45451	11	6	4	1	1	141.2	1068	7.53157	4.57265	3.69312	4.03428	2.66427	3.39949	3.02459	30.5143	27.25	20.9853	15.527	20.3846	18.3095	231.117	201.561	148.12	166.744	202.899	164.213	151.023	158.677	157.328	164.735	167.321	165.383	155.702	166.743	39.4167	-8.49282	-21.8776	15.3653	13.3608	27.6772	-15.8093	-35.097	6.36653	-6.71265
3648	CSc1ccc(C2=NN(c3ccccc3)C(c3cn(-c4ccccc4)nc3-c3ccc(Br)cc3)C2)cc1	8	29.5248	499.336	7.52161	29	6	4	0	1	161.582	2818	6.92761	4.45355	3.67787	2.60616	2.41008	2.53583	2.46294	45.4516	30.1194	22.9014	20.8784	22.419	20.2462	260.961	224.895	209.969	221.934	224.085	155.571	142.231	146.321	153.079	155.537	157.312	152.64	151.833	153.885	67.1646	27.141	-26.7385	-16.7734	15.2777	2.33594	-52.3675	-91.5603	13.6152	-0.0835068
735	CCOC(=O)[C@H]1[C@H](C(F)(F)F)[C@@H]2C=CC=NN2[C@H]1C(=O)c1ccc(F)cc1	21	20.9259	294.825	6.67964	6	9	2	3	4	449.285	1278	12.5116	3.99123	3.72165	10.4485	6.09797	4.6518	4.82216	29.7209	28.6889	21.4312	24.3421	17.5614	15.3093	231.735	202.536	200.85	195.264	168.723	172.884	149.018	160.076	164.721	168.785	170.601	166.029	171.129	176.944	57.6614	60.3878	-70.6376	-62.4143	97.2136	22.1103	-224.996	-173.862	7.1325	7.34667
460	Nn1c(SCC(=O)Nc2c(Cl)cccc2Cl)nnc1-c1cc(F)c(Cl)cc1Cl	23	21.6959	516.005	7.27574	17	12	5	1	5	224.941	2388	10.4438	4.91405	6.73302	5.91951	4.3886	3.15525	3.28918	62.8421	40.475	42.1818	40.3421	33.3208	38.0833	297.626	267.102	242.906	221.494	226.278	163.238	150.281	151.922	158.507	163.976	165.458	164.914	162.223	160.445	31.3995	4.92292	-79.0495	-19.4172	-19.6895	61.9422	-24.5748	43.089	5.20776	-5.90305
1740	COc1ccc(Cl)c(-c2nnc3sc(-c4cc(-c5ccccc5)nc5ccccc45)nn23)c1	15.49	26.6559	391.118	7.16293	30	8	5	1	1	157.037	1770	9.30713	5.7789	5.26714	3.20483	2.93381	2.87292	2.78811	36.1224	32.2593	27.9327	27.0943	25.4444	22.5	277.938	258.888	245.271	252.327	239.53	156.034	143.465	147.462	150.777	153.446	155.719	153.153	155.228	155.484	55.9314	11.9305	12.6335	6.70419	12.2716	-12.929	-65.1944	-66.925	12.6464	5.12078
312	COc1c(C(=O)O)c(O)c(/N=N/c2ccc(O)c(C(=O)O)c2)c2occc12	25	20.7985	473.548	7.15351	15	10	2	8	0	351.056	1234	13.2308	6.53125	8.64286	9.00142	5.44515	3.72656	4.61607	31.641	30.9512	29.1733	29.5181	19.9219	24.8214	251.04	255.204	201.69	182.066	201.354	161.041	147.961	149.921	153.277	159.414	161.881	165.366	160.878	152.307	27.6272	24.213	-11.1716	8.10651	-105.964	-78.3018	20.6864	-7.97633	13.1611	4.30112
2323	COc1ccc(F)cc1-c1cccc(-c2n[nH]c(=O)o2)c1	13	16.3609	120.028	5.52966	17	6	2	3	1	215.194	922	11.6875	5.78182	7.02632	6.72483	3.72876	4.09747	4.93494	28.8125	29.3529	23.3065	21.5469	18.0182	20.8947	250.235	237.58	204.836	178.419	164.34	163.075	147.219	153.024	153.49	154.846	157.052	162.593	169.822	170.159	40.0312	11.9688	-45.9062	-41.375	3.95312	-3.0625	6.60938	16.9688	6.50195	0.458984
951	CC(C)c1nnc2n1N=C1c3ccccc3CC1S2	19.3	15.5325	116.105	5.39635	11	5	4	0	0	89.1145	970	7.2862	2.57143	0.75	2.70044	2.21434	2.45635	2.02083	29.3939	29.2222	23.1899	19.1026	15.8333	9.02083	240.438	209.454	185.924	202.528	195.912	161.099	146.281	151.083	156.22	165.906	164.746	153.44	153.481	160.271	65.2394	63.1311	-0.0761147	-76.6789	-93.2391	-21.0524	-69.0664	-30.1769	11.0854	5.73095
2032	Clc1ccc(C2Cn3nnnc3Cc3ccccc32)cc1	14	16.9182	139.842	5.68245	17	5	4	0	1	97.9775	1074	7.92956	2.79235	2.03819	2.88169	2.66939	2.4633	2.12584	31.5882	28.7838	20.6512	17.1753	17.0492	23.6562	254.635	225.334	182.459	183.394	159.521	160.169	146.4	149.479	153.158	156.755	160.95	162.154	166.96	170.793	37.5926	-11.3951	-55.5062	-28.3951	48.4074	-26.8272	-30.4568	-2.5679	5.2154	-5.06488
921	COc1ccc(/C=C/C(=O)C2C(=O)NC(=S)NC2=O)cc1OC	20	17.2464	177.785	6.01348	6	8	2	5	0	248.903	1228	10.2823	5.16393	6.15033	6.7271	3.25505	3.49636	4.32704	33.1892	29.4211	25.4324	25.2078	18.2131	21.6275	241.981	230.816	172.756	175.422	171.582	160.752	147.342	154.327	153.891	156.331	160.302	158.783	161.072	161.564	43.9911	-16.7577	-37.3483	-1.39015	-82.7656	25.3237	103.134	2.43057	8.67275	-0.775749
188	O=C(NS(=O)(=O)c1c(-c2ccccc2)noc1-c1ccc([N+](=O)[O-])cc1)c1ccc(Cl)s1	28	25.1999	383.434	7.11232	22	12	3	6	1	373.614	2064	12.0567	7.30615	6.54137	8.49122	5.42086	4.87515	4.14159	46.9091	41.2979	32.7742	34.0104	31.2234	28.5426	285.663	250.092	253.035	252.018	244.343	156.458	143.363	145.284	151.282	157.97	154.958	155.258	154.515	153.922	4.00023	50.3873	-8.23362	40.9479	-81.4335	-60.1904	-96.5798	-36.9591	3.60124	-0.0144628
3496	Cc1c(-n2c(Cc3ccc(Cl)cc3)nn(CC(=O)NNC(=S)Nc3ccccc3)c2=O)c(=O)n(-c2ccccc2)n1C	8	32.8882	6286.85	10.1813	28	13	8	3	1	320.297	2200	8.60941	4.96581	5.03358	4.64198	3.35057	3.41265	3.73476	31.8841	28.8493	23.2222	21.4167	20.1209	21.2033	243.735	216.456	201.041	199.929	191.96	162.197	150.117	155.954	160.135	161.147	163.59	161.455	161.852	162.057	90.0868	34.976	-19.2353	-4.65634	24.2954	-138.78	-60.0493	17.3032	15.912	1.82693
3345	COc1ccccc1N1CCN(CCC#N)CC1	9	13.3541	143.22	5.55217	6	4	3	1	0	120.556	734	5.94595	1.52308	1.86047	3.25826	2.26515	2.09359	2.07558	19.8378	22.7368	14.8621	12.8526	8.73846	10.093	201.788	172.726	134.983	123.91	112.395	165.074	148.146	161.118	162.153	158.879	164.488	166.529	169.636	168.641	38.5924	-29.5274	-36.6771	-36.2622	-39.9036	-21.9766	28.29	6.95982	7.5084	-1.0504
394	O=C1C(Cl)C(c2cc3ccccc3nc2S)N1c1ccc([N+](=O)[O-])cc1	24	20.6891	268.852	6.54967	16	8	3	3	1	252.143	1544	10.4977	5.52269	6.20765	6.63535	3.31532	3.24651	5.10524	40.6316	32.6829	27.7558	25.8889	25.2254	24.3115	275.689	245.288	227.837	227.285	217.232	157.023	143.935	146.783	153.442	155.12	154.498	154.337	156.447	158.866	36.219	4.81697	-45.9066	-78.3118	-25.5237	28.5473	42.5849	28.0841	6.70637	-5.19668
2825	Fc1cccc(F)c1NCn1nc(C23CC4CC(CC(C4)C2)C3)n(-c2ccc(Cl)cc2)c1=S	11	27.0034	827.438	7.91226	17	8	4	0	3	249.832	1828	7.51809	3.22465	2.87716	4.30744	2.58239	2.38954	2.07839	31.5172	27.6508	19.1771	16.3105	21.7083	16.087	237.812	191.493	194.703	207.173	188.673	164.144	146.317	151.617	158.167	167.735	163.296	158.379	159.942	158.088	69.2145	38.6735	50.1092	36.6985	-80.0382	-9.92641	-13.4071	62.323	9.86891	-5.9352
810	Cc1cc(C)nc(NS(=O)(=O)c2ccc(/N=C/c3c[nH]c4ccccc34)cc2)n1	20	23.0215	223.273	6.47311	21	8	5	2	0	230.827	1404	8.50926	3.98394	3.67932	4.8089	3.47747	3.71858	2.84416	29.25	32.1961	23.1471	20.5755	18.6627	17.5063	244.387	219.806	184.975	193.37	206.017	160.636	145.682	152.395	156.226	160.091	162.896	160.482	157.489	153.195	29.5856	42.8889	-77.838	-35.5571	-8.05478	102.856	-186.529	-30.939	8.55339	-2.83854
3646	NNC(=O)c1cn(Cc2ccc(Cl)cc2Cl)c2cc(C(F)(F)F)ccc2c1=O	8	21.8233	253.913	6.56661	16	10	3	2	5	388.684	1756	12.4302	7.44205	6.77493	9.71711	4.45429	6.13178	4.70603	43.9	33.381	29.2584	27.5	27.1828	30.6795	267.453	252.032	219.307	225.864	212.451	168.823	150.154	157.952	153.774	164.598	162.873	160.153	168.838	164.429	28.9586	49.0389	-0.54071	-50.3438	-6.1763	-45.0781	-16.5155	46.0044	4.88	-3.44
2439	Cc1ccc(Nc2ccc(Nc3c(Cl)c(Cl)c(C#N)c(Cl)c3C#N)c3nc[nH]c(=O)c23)cc1	12	25.5984	364.253	7.09177	22	10	6	1	3	247.794	2066	10.1047	6.50222	6.47126	5.38682	3.88297	3.59379	3.89956	44.913	33.6122	34.5294	32.5766	28.86	30.7126	289.851	273.488	242.116	252.686	240.411	158.208	145.747	147.893	152.303	158.589	157.409	155.59	157.166	157.705	40.4171	14.3625	1.23695	35.023	17.2005	-16.6139	9.32493	-32.3909	11.5695	-2.08507
2692	O=C1CCSCCC(=O)Nc2nc(nc(-c3ccccc3)n2)NC(=O)CCSCCC(=O)Nc2nc(nc(-c3ccccc3)n2)N1	11	35.712	531.458	7.80168	24	16	10	4	0	397.174	2368	8.8538	4.41254	4.08563	5.22597	3.87814	3.51308	4.12855	31.1579	29.9	21	24.3176	21.5842	22.4771	238.556	197.233	201.812	207.074	200.826	163.424	148.93	154.959	161.245	164.153	163.629	164.442	161.76	162.555	106.696	146.405	25.715	29.1388	-35.3167	-280.614	-296.227	-248.729	5.28255	1.12327
3862	O=C(Nc1ccc(Cl)cc1)c1cn(CCO)c2c(cc(Cl)c3ncccc32)c1=O	6	22.7415	509.236	7.29762	20	8	3	3	2	240.149	1688	9.39113	5.07111	4.21536	5.45794	3.938	4.56335	3.45486	38.3636	30.9574	26.3627	25.9904	23.27	21.1852	266.981	240.474	228.514	205.12	190.378	158.246	144.829	149.454	154.841	156.482	153.325	157.936	162.062	160.583	31.3245	8.80696	29.2257	2.28599	-60.1749	-73.9593	-40.9536	-39.3766	9.42097	4.08523
1150	O=C(Nc1ccccc1)Nc1c(-c2cccc(F)c2)nc2ccccc2c1O	18	22.0463	450.67	7.14035	22	6	3	2	1	263.5	1164	9.72727	6	5.08602	5.98864	4.11871	4.34307	4.33632	26.4545	27.5319	21.4592	21.2062	20.1649	18.4086	253.511	221.386	217.818	215.227	206.725	160.371	145.646	147.466	157.085	159.876	160.729	158.403	158.623	160.631	26.4112	6.74793	-0.735537	5.14256	-12.7541	-42.8285	-25.8574	-54.4814	7.0186	-0.904959
3228	CCSc1nnc(-c2ccccc2COc2ccc(C)cc2)o1	10	17.7062	233.066	6.28423	17	5	2	2	0	122.087	1148	7.32791	3.8871	2.84889	2.97773	2.72461	2.53166	2.41897	28	27.9302	20.2346	17.8214	21.2419	15.28	236.561	206.492	178.458	212.468	223.889	158.818	143.492	150.477	151.986	158.249	164.548	156.218	146.592	156.458	67.4376	54.5618	11.0888	-31.7765	-56.4065	-75.4225	-24.6501	-18.3705	9.28198	2.7906
955	Fc1ccc(/C(Cn2nnc3ccccc32)=N\Nc2nc(-c3ccc(Cl)cc3)cs2)cc1	19.14	25.5129	443.413	7.25765	26	9	6	0	2	207.731	1764	9.50103	6.18755	6.06349	4.32773	3.13015	3.32431	3.2522	36.75	32.2692	24.1667	22.3069	28.1915	24.978	270.331	226.28	207.271	224.689	233.731	160.863	146.9	149.946	158.314	162.238	162.489	161.077	160.633	157.054	41.3807	-17.8902	-66.9587	-62.6084	46.8292	17.3204	-49.9121	-19.9919	5.44444	-7.36111
3830	COC(=O)CC(O)(CC(=O)OC)C(=O)OC	6.67	11.0321	80.3633	4.85656	0	7	0	7	0	260.146	786	10.5333	0.481481	0.04	8.67153	4.96469	3.77778	3.64	26.2	25.7241	22.5926	19.6176	9.44444	8.16	192.052	196.514	150.662	132.991	97.6705	167.605	149.765	163.87	158.085	165.83	168.192	165.796	177.012	167.459	54.7822	1.93778	-93.3067	-48.4578	61.0044	20.5156	-154.907	-68.6889	7.78222	-2.79556
2092	O=C(N/N=C/c1c(O)cccc1O)c1cc(Cl)c[nH]1	14	14.4584	89.8736	5.14026	11	7	3	3	1	194.978	1070	10.1243	7.82828	6.28472	6.72336	3.71387	5.81725	4.74408	36.8966	30.8333	25.3036	21.9434	25.1818	25.1562	250.901	210.709	165.43	199.847	216.157	163.067	151.702	151.413	159.312	166.495	172.343	165.798	157.077	157.341	5.60119	-13.3098	-13.6196	-7.43126	-35.6431	9.8855	42.7534	-37.3705	3.83472	-6.47206
2238	CCS(=O)(=O)c1nnc(NC(=O)c2cc(C)nc3ccccc23)s1	13	18.7385	150.577	5.88995	15	9	4	3	0	244.47	1454	9.54971	5.46111	4.90476	6.43341	3.38925	4.38153	3.66169	38.2632	37.65	27.9	25.5769	25.75	26.5714	252.734	224.874	212.582	189.077	195.461	160.704	145.127	151.155	157.378	158.254	157.979	162.977	162.72	159.009	39.7113	81.8898	-20.5657	-60.8209	-36.3795	-88.662	62.8418	-5.85688	8.82271	1.85042
2263	CCN1CCN(CC2SC(c3ccccc3)N(c3ccc(Nc4nc(Oc5cc(=O)n(C)c6ccccc56)nc(N(C)C)n4)cc3)C2=O)CC1	13	39.7405	1563.99	8.96444	28	13	9	3	0	324.531	2262	7.3895	4.4292	3.85077	3.56628	3.07292	2.82711	2.66092	24.8571	26.4845	20.3881	18.0476	18.208	17.2594	223.96	205.067	180.456	187.51	192.014	163.053	148.008	158.706	157.14	160.756	160.353	162.163	160.209	158.323	140.334	88.3218	17.7326	108.958	91.53	-102.784	-53.9073	-62.5921	23.8951	3.80328
1125	COc1cc(O)ccc1/C=C/C(=O)N1C(=O)C(=O)NC2CCCCC21	18	19.2868	342.899	6.75373	6	7	2	5	0	278.722	1086	8.57778	4.28947	5.52941	6.19383	4.14835	3.44956	4.22181	24.1333	25.4681	18.2414	16.5492	16.0921	19.9706	218.079	186.47	164.894	159.028	170.271	162.898	146.938	153.901	159.707	161.667	161.866	163.441	162.565	157.787	57.604	53.1417	48.5847	-16.8257	-77.1565	-101.681	-10.561	-8.31012	9.94173	-0.062716
4005	COc1ccc(-n2c(S)nnc2Sc2nnc(-c3ccccc3)n2-c2ccccc2)cc1	5	25.2822	336.318	6.98121	28	9	6	1	0	158.447	1716	8.83506	5.96556	4.79232	3.16894	2.88993	3.06104	2.85829	34.32	31.5556	27.6078	27.8224	26.68	22.3271	263.405	242.609	231.126	236.225	236.582	158.247	145.718	150.503	153.091	156.404	158.404	155.214	156.794	156.972	64.8069	5.51111	-26.5126	3.37877	42.8805	4.07654	-65.8049	-114.32	13.36	5.6
4357	CCOC(=O)C1C(=O)C=C(c2ccc([N+](=O)[O-])cc2)CC1c1ccc2c(c1)OCO2	0	23.489	293.159	6.77933	12	8	1	7	0	338.056	1308	10.449	5.62097	5.04202	6.89909	3.50222	3.84297	3.80696	26.6939	27.7692	20.3448	19.5873	18.8226	17.521	238.082	217.732	187.582	196.094	188.527	159.435	143.943	149.65	152.616	153.973	157.084	155.805	157.502	161.044	61.7926	20.9204	-60.3261	-67.6093	-50.93	-28.3565	37.8147	31.1603	9.78259	-0.134527
2766	Cc1ccc(OCc2ccccc2-c2nnc(SCc3cccc(C)c3)o2)cc1	11	22.7653	385.572	7.01944	23	5	2	2	0	147.642	1368	7.2244	4.97468	3.77656	2.89495	2.6966	2.82302	2.65605	26.8235	27.3519	20.6	16.7395	22.4304	17.2198	242.44	216.069	182.434	203.786	229.77	157.097	142.041	148.054	148.934	158.289	160.566	158.256	149.3	157.644	67.9195	13.1846	-42.7689	10.6565	31.059	11.4505	-30.1753	-55.983	9.43253	-4.005
2170	O=[N+]([O-])c1cc(Cl)cc2c1NCC1C2=NNC1c1ccc(Cl)cc1	14	19.2464	199.046	6.16901	12	8	4	2	2	202.149	1490	9.64472	4.59394	4.52222	5.61526	3.26913	3.22432	3.25314	41.3889	32.3333	24.2391	23.3438	24.1273	25.925	265.646	226.235	191.957	179.143	199.385	161.108	148.703	149.405	155.815	161.969	162.955	165.359	162.404	157.882	23.5673	4.90219	3.29386	-11.8989	-26.6823	-9.53083	12.4744	-17.8019	4.75	-2.80556
2628	NC(CCC(=O)n1c(-c2ccccc2)nc2ccccc2c1=O)C(=O)O	12	20.0629	340.572	6.78614	16	7	3	4	0	290.722	1104	9.34884	4.29293	3.87879	6.76098	4.9319	3.80752	3.98765	25.6744	26.6222	20.3564	20.2079	17.2626	14.6869	236.529	203.994	209.972	215.791	191.051	161.121	146.707	150.414	158.581	163.313	159.888	155.542	155.24	160.334	42.5744	52.8561	23.7496	-47.6225	-91.2839	-135.594	-74.9643	45.8496	9.02001	0.46133
1932	O=c1c2c3c(sc2nc(/C=C/c2ccccc2)n1-c1nc2cc([N+](=O)[O-])ccc2s1)CCCC3	15	27.5414	697.2	7.77085	24	9	4	3	0	285.174	1818	9.51709	6.29524	5.2849	5.48411	3.47707	3.35003	3.03221	34.9615	32.4912	25.096	26.4435	28.0095	24.8889	268.527	232.058	233.318	260.855	260.175	156.045	142.533	146.116	152.53	154.737	156.914	153.234	149.967	149.896	58.1111	68.3333	100.111	29.1111	-13.1111	-125.889	-105.889	-46.6667	10.1183	6.7574
3404	C#CC[n+]1ccc2c([nH]c3ccccc32)c1C(=O)/C=C/c1cc(OC)c(OC)c(OC)c1	9	24.5346	963.543	8.03377	19	6	2	4	0	222.056	1313	8.32727	4.01493	4.36522	4.03737	3.10032	2.94237	2.91981	23.8727	26.0862	23.027	20.303	14.5075	16.0174	237.792	243.091	192.069	180.182	166.686	158.437	144.385	152.673	149.637	152.667	157.064	156.322	160.497	157.359	73.634	9.75702	3.24165	-74.9564	-189.706	-34.3375	156.091	84.0628	20.9957	11.076
335	O=S(=O)(Cc1nnc(CS(=O)(=O)c2c[nH]cc2S(=O)(=O)c2ccc(Cl)cc2)s1)Nc1ccc(Cl)cc1	25	28.5242	1506.51	8.59848	22	16	4	6	2	411.579	2918	10.1344	4.44231	7.12817	7.91498	3.73991	3.81443	5.90233	56.1154	49.5455	36.5546	37.8167	35.1731	33.7528	281.429	238.655	225.188	224.266	219.701	158.036	142.359	147.386	153.989	157.185	158.504	156.329	159.626	160.432	-43.9167	31.5216	-39.9784	-35.0556	42.0988	12.2469	-127.525	82.1759	-0.350592	-7.67604
2289	COc1cccc(/C=N/c2ccc(S(=O)(=O)Nc3nccs3)cc2)c1O	13	20.0837	220.973	6.35355	17	9	3	4	0	246.692	1542	9.43631	4.35354	3.95082	6.01687	3.45962	3.25281	3.10236	37.6098	37.3721	28.3625	25.7738	20.0909	19.2459	255.003	228.804	190.395	200.312	201.101	159.011	144.409	151.142	153.291	158.393	159.981	157.213	155.647	158.24	0.594554	13.9736	-19.8168	-84.503	-0.929011	7.9378	-17.9109	-21.1032	6.90006	-4.37359
785	Cc1cccc2c1CC1Sc3nncn3N=C21	20.3	14.0493	94.1152	5.07515	11	5	4	0	0	79.3368	894	8.53498	3.41667	1.33333	2.9384	2.30262	2.83333	2.86667	33.1111	31.8667	26.2787	19.8167	15.625	10.8667	257.892	236.837	164.97	158.012	166.043	160.111	146.668	150.591	151.586	154.286	162.919	166.092	168.228	174.454	44.888	17.2612	-40.4041	-28.652	14.5414	27.6487	-41.5299	-39.5519	7.84362	1.06722
3439	O=C(O)c1cc(-c2ccccc2)[n+](C/C(=N/N=C2\N=C(c3ccccc3)CS2)c2ccccc2)c2ccccc12	9	31.7151	1561.86	8.73993	28	7	4	2	0	255.253	1793	7.9453	5.11423	4.58974	3.92698	3.10045	3.2149	2.99885	27.5846	28.1571	20.911	20.9286	20.9101	19.8846	257.784	226.892	217.005	219.76	221.003	155.852	142.017	145.467	152.229	154.309	155.596	154.919	154.378	154.032	52.2667	6.29778	-25.7156	-21.0622	41.7867	-23.0844	-100.724	-61.52	12.574	0.325444
2468	O=Nc1c(-c2ccc(Br)cc2)nc2sc(Cc3noc4ccccc34)nn12	12	21.7871	279.705	6.62699	23	9	5	2	1	172.054	2512	11.2841	8.06727	8.57562	4.65011	3.60243	3.7905	3.91633	67.8919	38.4634	32.359	30.2267	40.9388	51.275	294.154	253.955	242.741	245.919	257.575	156.905	145.344	147.081	154.182	158.226	159.637	159.743	157.902	153.75	42.2315	11.9947	22.972	-37.1244	-38.6563	-14.4662	-21.8092	-5.59008	6.09277	-0.401753
1251	O=C(N/N=C/c1c[nH]nc1-c1ccc(Cl)cc1)c1ccncc1	18	17.7751	325.038	6.61685	17	7	5	1	1	158.978	1186	9.41728	5.97454	5.67183	4.54221	3.12206	3.5526	3.36219	33.8857	30.1081	23.1159	21.3485	24.625	23	259.606	222.595	193.626	191.158	207.807	161.644	149.519	152.068	156.085	162.399	166.192	164.818	162.154	157.731	18.8528	-26.77	-16.8562	-23.2593	-20.9488	3.93213	27.2148	-3.09788	3.84735	-5.33633
1497	N#Cc1ccc(C(=O)OCc2csc(N)n2)cn1	16	13.6134	86.8469	5.05193	11	7	4	2	0	178.059	984	11.2479	7.62963	4.35897	6.84842	3.89152	6.02915	3.38604	37.8462	34.2963	25.4667	22.3556	29.0741	24.5385	265.776	227.037	212.477	201.47	232.834	161.434	148.284	152.711	157.217	161.823	161.154	162.322	159.5	158.005	20.3425	-3.55424	-26.6884	-49.2525	14.8251	20.4497	5.21433	-26.641	2.89941	-4.81657
448	Clc1ccc(/C(Cn2cncn2)=N\Nc2nc(-c3ccc(Br)cc3)cs2)cc1	23.85	22.0582	224.191	6.44212	22	9	6	0	2	129.309	2762	8.50278	4.89295	4.8878	3.07879	2.8326	2.74213	2.61634	65.7619	36.4667	28.5714	25.1667	34.7722	29.2206	279.668	231.963	210.801	226.709	224.376	159.058	147.216	152.217	155.472	159.152	162.458	160.877	159.913	157.975	26.9073	-38.3882	-47.7179	2.11608	35.7165	-23.2894	-20.183	-8.21942	3.15646	-8.0907
3905	Nc1ccc(Nc2ccc(F)cc2)c2c(=O)[nH]cnc12	6	15.7228	162.743	5.78532	16	6	4	1	1	208.944	856	10.5161	4.86	5.10811	6.74014	3.54581	3.67111	4.33183	27.6129	28.303	22.5672	20.1194	17.18	17.1622	246.382	222.522	194.446	185.203	174.668	165.909	151.694	152.302	159.871	164.34	161.569	163.04	164.271	170.279	20.1457	-1.34131	-34.8293	-27.8616	-27.5245	-35.8481	11.0291	-19.5952	5.81165	-2.31634
438	O=C(N/N=C/c1ccco1)c1cc(Cl)c(Cl)[nH]1	24	12.9752	174.547	5.69282	10	7	3	2	2	127.261	1220	10.6337	6.65278	5.46465	5.30252	4.143	3.8759	3.47016	50.8333	35.88	35.4048	26.5	28.3333	28.6818	275.976	218.625	207.725	233.96	229.572	162.638	151.728	154.279	164.066	168.292	170.56	160.115	156.014	158.631	11.0135	-24.2457	-20.446	12.8856	-27.9409	10.7695	5.77778	-32.8592	1.12674	-5.72569
730	COc1ccc(-n2c(S)nnc2CSc2nnc(-c3ccccc3)n2-c2ccccc2)cc1	21	25.9893	367.539	7.10075	28	9	6	1	0	162.697	1754	8.41044	5.31414	4.55656	3.06976	2.62667	2.72646	2.71448	33.0943	30.7368	26.0734	25	23.0818	21.5676	257.659	235.308	221.781	213.612	213.451	158.66	145.646	150.643	154.551	156.748	157.352	156.863	155.403	158.415	74.674	19.488	-71.4207	-89.3567	-12.1112	47.6692	43.038	-42.3497	13.8277	4.24991
3162	N#Cc1c(Nc2ccc(F)cc2)nc(SCc2ccc(Cl)cc2)nc1-c1ccccc1	10	24.1391	431.859	7.1995	24	7	4	0	2	227.981	1702	8.97977	5.7331	5.1358	4.85066	3.56842	3.48685	3.27878	36.2128	31.34	24.8614	23.703	24.0103	21.9697	274.74	235.076	245.315	256.45	237.808	157.995	142.638	146.006	154.024	159.429	154.179	154.859	154.604	153.564	34.8397	-2.31747	-3.29997	33.2889	12.3127	-101.101	-70.6368	-42.538	4.9656	-4.14713
1084	C/C(=N\NC(=S)Nc1ccc(C(=O)NCC(=O)O)cc1)c1ccccc1	19	19.558	221.385	6.35542	12	8	4	3	0	243.125	1310	8.37374	4.15459	4.24444	5.52556	3.04958	3.33767	3.36991	29.7727	27.3333	20.4222	19.0444	19.9565	22.0833	236.409	199.903	178.565	176.526	186.377	161.806	149.342	152.779	158.572	161.454	161.833	162.111	161.59	157.132	34.8749	-14.1609	-76.9674	-57.8209	51.3838	30.8797	-14.5319	-25.3756	4.7686	-7.70248
2957	FC(F)(F)c1cccc2c(NC3CCCCC3)c(-c3nnc(S)n3Cc3ccccc3)cnc12	10	27.1115	471.68	7.38008	21	9	5	0	3	329.867	1668	8.98808	4.16399	4.02376	5.68737	3.25779	2.84737	3.25505	28.7586	27.4839	19.5473	19	19.5482	18.6012	235.835	198.135	210.74	212.893	198.404	166.932	147.414	156.041	158.406	166.619	161.533	160.799	160.569	165.371	84.0951	141.276	127.206	124.593	26.8548	-143.293	-157.188	-105.621	9.47681	5.63971
172	COc1ccc(/N=N/C2C(=O)N(n3c(CCl)nc4ccccc4c3=O)C(=S)N=C2C)cc1O	28	25.5984	754.004	7.81932	16	12	6	4	1	278.547	1868	10.441	5.77451	5.31667	5.57094	3.56957	3.73731	3.90833	37.36	31.5472	30.2	29.2544	25.7549	23.09	256.969	244.939	222.168	222.912	219.642	161.82	148.662	155.898	160.726	160.643	160.943	160.131	159.403	162.737	82.1289	54.058	-13.6562	-63.0837	-73.4797	-3.2433	-61.2943	-57.9714	15.5452	5.8508
1438	O=C(NS(=O)(=O)/C=C/c1ccccc1)c1ccc(Cl)s1	17	15.3454	150.25	5.70545	11	7	1	3	1	212.697	1520	9.01646	4.59829	4.01075	7.0899	5.0398	4.52778	3.52389	50.6667	43.2581	28.1	30.1132	28.4103	24.3871	280.219	215.535	224.221	217.934	210.696	154.931	140.097	145.235	153.576	157.323	155.165	157.306	158.625	155.035	-20.1315	20.4906	-40.6016	48.4684	3.03254	4.3572	-46.8063	-31.2319	-1.19556	-4.58222
3516	COc1ccccc1N1CCN(CC#N)CC1	8	12.647	104.034	5.17534	6	4	3	1	0	116.306	696	6.35294	1.58621	2.39474	3.42075	2.33333	1.8319	2.45395	20.4706	23.3143	15.7436	13.0227	8.36207	10	205.308	180.779	137.472	129.206	110.043	165.032	148.472	161.803	160.898	158.502	165.994	165.107	168.192	172.346	36.0657	-29.1592	-28.7543	-44.6851	-70.3183	-8.03114	61.5779	27.7336	7.40052	-1.19723
3178	N#Cc1cccc(C(=O)OCc2csc(N)n2)n1	10	13.6134	87.3002	5.05714	11	7	4	2	0	178.059	984	11.2479	5.97531	4.91358	6.84842	5.18401	4.02126	3.92478	37.8462	34.2963	25.6	23.4884	27.037	24.1111	265.776	223.582	219.29	201.702	230.346	161.434	148.284	152.525	160.075	158.908	162.389	163.966	156.065	160.635	22.3425	6.08679	-6.32939	-39.7153	-0.584484	-1.2426	-13.0421	-22.3412	2.89941	-3.04734
3591	N#Cc1cc([N+](=O)[O-])ccc1NS(=O)(=O)c1ccc(NC(=O)c2cn(CCO)c3c(cc(Cl)c4ncccc43)c2=O)cc1	8	33.6328	4310.94	9.82753	26	15	6	7	1	525.055	2314	11.5814	5.52184	6.74935	8.46863	5.34709	4.42229	5.91118	37.3226	35.3333	27.8552	26.962	24.0759	22.9225	266.523	246.195	226.054	213.814	200.903	159.754	146.087	149.584	154.096	157.664	155.758	158.681	159.78	160.972	17.3406	41.0438	6.08759	-61.9106	-82.9481	-60.3845	-72.0072	92.3768	10.3356	-0.810094
3260	N#C/C(=N\Nc1ccc(Cl)cc1)c1nc2cc(Cl)ccc2o1	10	17.1085	306.479	6.51361	15	7	4	1	2	137.816	1386	10.6403	7.00285	5.40635	4.59387	4.44483	4.55355	3.49971	46.2	34.75	29.2203	26.9245	29.8462	29.7714	293.3	241.159	248.252	270.286	245.788	158.266	146.027	148.47	158.257	164.455	160.55	153.375	162.354	159.103	21.1535	5.45931	27.7916	22.5376	-5.97641	-31.9622	-79.3495	-60.8376	1.90222	-4.66222
2095	N#Cc1c(Cl)nc(SCc2ccc(Cl)cc2)nc1-c1ccccc1	14	18.4822	282.423	6.51887	18	6	3	0	2	132.986	1640	8.27584	4.80222	4.21759	3.79961	3.16838	3.09202	2.82009	46.8571	34.7027	29.6389	31.2676	27.88	25.3958	294.282	255.282	253.671	253.317	248.02	154.107	140.094	144.062	149.145	157.114	151.585	155.57	153.595	153.847	26.1823	-0.941618	12.4871	24.1187	-0.457697	-54.6538	-54.721	-22.9136	3.88	-1.88
347	Cc1cccc(Oc2nc(-c3ccc(NC(=S)Nc4ccccc4)cc3)nc3ccccc23)c1	25	26.9675	1069.78	8.19898	28	6	4	1	0	166.208	1546	7.72222	4.43785	3.50529	2.968	2.81939	2.71715	2.5302	27.6071	27.2333	20.7317	20.1532	18.7712	16.8968	255.87	219.077	223.4	237.176	223.13	156.36	143.563	147.136	153.401	158.815	156.373	150.359	150.953	152.399	54.9444	19.3889	13.3819	8.72222	-41.3403	-51.1667	-94.0417	-45.4861	8.5	-2.5
4245	c1ccc2c(c1)CCCc1nnc3nncn3c1-2	0	14.647	103.732	5.2296	15	5	5	0	0	91.6389	724	9.03448	1.36364	0	3.15996	2.53906	2.44444	2.5	24.9655	27.8125	20.2055	18.4667	7.90909	5.5	243.594	219.128	189.906	137.64	90.4466	163.401	149.187	153.618	156.362	159.09	161.227	168.916	185.878	194.46	49.9869	50.4958	34.9346	-45.4649	-58.3971	-41.8882	-32.1439	-13.4197	7.15815	3.84185
4269	CCn1cc(C(=O)O)c(=O)c2cc(F)c(N3CC[N+](CCO)(CCO)CC3)cc21	0	22.0748	302.762	6.77766	10	9	3	5	1	362.257	1295	7.82143	3.18033	2.72174	6.46887	3.52522	3.97268	3.1837	23.125	24.5172	17.5867	15.7556	15.1639	13.9565	201.76	187.064	137.904	136.283	157.37	167.736	150.55	160.664	162.174	160.037	167.586	171.606	167.196	165.124	67.3265	53.8571	63.7755	113.102	36.9184	-91.6735	-112.367	-77.7959	16.7302	3.55134
781	Cc1ccc(-[n+]2ccn(Cc3ccccc3)c2/C=N/O)cc1	20.6	16.9586	184.746	6.00744	17	4	3	1	0	135.139	877	6.7	3	2.45714	3.37847	2.91767	2.80041	2.81111	21.925	24.6667	17.3605	15.0825	14.1235	12.7429	228.229	204.167	177.124	183.451	164.856	160.75	146.679	152.5	154.543	159.5	161.74	159.683	160.713	161.303	33.995	-22.17	-27.915	26.8325	9.27	-48.4825	-19.9775	-43.525	9.045	-2.07
1773	COC(=O)[C@]1(C)[C@@H](O)CC[C@]2(C)c3cc4c(cc3CC[C@H]21)[nH]c1ccccc14	15	22.6942	237.495	6.49977	13	4	1	3	0	201.625	1132	6.32727	2.27778	2.30233	3.66591	2.31206	2.24045	2.19444	20.5818	23.339	18.0252	14.3301	11.9097	11.1783	216.294	213.086	148.928	132.959	152.583	160.062	143.19	148.678	149.949	156.292	159.532	164.911	159.324	161.696	76.0648	48.0727	-66.479	-143.269	-35.3293	-25.643	-6.75835	40.7078	24.0774	1.34545
360	COc1ccc(C(=O)/C=C/c2ccc(OCc3nnc(-c4ccc(C)cc4)o3)c(OC)c2)cc1	24	26.2604	480.587	7.39878	23	7	2	5	0	234.028	1414	8.86207	5.09524	4.61	4.03496	3.30941	3.32857	3.21278	24.3793	26.377	21.0702	17.4567	18.419	17.53	237.061	222.68	176.159	190.36	190.177	158.814	143.663	151.504	151.506	156.119	159.917	157.643	159.911	158.304	86.1605	7.84899	-59.038	-60.6873	16.6195	47.6064	-19.83	-80.3389	13.7027	-4.18906
2608	COc1ccc(-c2nn3c(-c4cccc(-c5nnc6sc(-c7ccc(OC)cc7)nn56)n4)nnc3s2)cc1	12	30.7892	562.34	7.66711	34	13	9	2	0	198.674	1998	10.7434	9.26357	8.31418	3.61225	3.12993	3.60049	3.48148	36.3273	34.3934	30.6355	27.027	31.7674	29.908	271.5	259.483	222.581	235.309	260.436	160.003	147.997	153.141	154.474	156.967	160.568	161.485	159.409	158.333	80.9817	14.2165	-4.22013	18.4821	68.711	-0.139871	-26.5085	-12.7213	16.0496	6.17355
2498	O=C(N/N=C/c1ccc(Cl)cc1)c1ccc(-n2c(-c3ccccc3)nc3c(Br)cc(Br)cc3c2=O)cc1	12	29.2148	4187.49	9.64819	28	9	4	2	3	244.662	4088	9.25443	4.93399	4.65209	4.53077	3.42917	3.09536	3.29049	75.7037	35.7241	32.4545	40.1322	30.5242	29.9508	290.81	251.766	246.563	254.868	238.248	154.759	142.646	145.63	151.739	157.531	156.478	150.535	149.443	153.732	36.0754	6.10596	36.0171	-6.40524	-95.8081	-113.346	-42.7453	61.3285	7.44444	-3.77778
1816	O=C(CCNC12CC3CC(CC(C3)C1)C2)c1ccc(F)cc1	15	17.856	842.162	7.52443	6	3	1	1	1	192.479	902	5.65217	2.55	2.81159	4.18433	2.40931	2.63958	2.87319	19.6087	22.1837	12.5811	9.08861	12.625	14.7681	204.991	159.157	127.211	126.361	151.132	164.073	144.061	150.087	159.282	166.442	164.65	166.074	164.345	158.752	37.3384	-13.3459	-36.2344	21.2268	45.4348	89.4612	-17.0491	-34.2609	4.67675	-10.0397
1511	COCCn1c(S)nnc1-c1cnc2c(C(F)(F)F)cccc2c1O	16	19.4427	222.762	6.3224	15	10	4	2	3	331.312	1376	12.666	5.07297	6.68313	8.71873	5.54806	3.75752	4.46347	36.2105	31.675	28.2338	25.6484	20.3881	23.4259	244.494	243.434	199.105	191.325	178.617	172.097	151.351	164.171	157.543	167.858	168.935	169.477	169.147	167.63	58.8526	70.8691	19.3652	13.9843	-14.483	-82.6238	-51.0328	60.6295	10.1385	7.64958
903	CCOC(=O)C1=C(C)NC(=S)NC1c1ccc(OCCCCCOc2ccc(C3NC(=S)NC(C)=C3C(=O)OCC)cc2OC)c(OC)c1	20	37.0215	606.797	7.99743	12	14	4	8	0	350.055	2524	7.34289	2.65734	2.13942	3.76403	2.72939	2.45644	2.39382	27.1398	25.7917	20.3558	20.4807	14.5385	14.1597	216.008	202.477	181.362	176.698	148.458	162.553	147.449	156.483	156.746	156.312	159.17	157.854	163.144	162.403	150.148	89.5556	27.0123	-134.642	-300.963	-108.79	89.9753	2.46914	27.0385	16.984
4208	O=c1[nH]cnc2nc(-c3ccc(Cl)cc3)cc(-c3c(-c4ccccc4)[nH]c4ccccc34)c12	2	26.7249	390.992	7.16261	31	6	4	1	1	191.644	1538	8.9121	5.42815	4.04129	3.83288	3.24264	3.26591	3.18484	30.76	29.0545	23.2845	22.7542	21.1067	18.4122	273.14	248.041	251.323	252.408	226.371	155.312	142.745	145.008	150.085	152.285	150.785	149.489	152.653	158.497	35.4765	15.5872	28.9363	20.4879	2.45086	-14.7975	-109.156	-157.342	10.458	3.5244
511	Cc1cc2nc(-c3ccc(C(=O)N[C@@H](CC(C)C)C(=O)NCC(=O)O)cc3)[nH]c2cc1C	23	24.7145	1433.6	8.43109	15	8	4	4	0	314.583	1344	7.5	3.47407	3.2406	5.24306	3.29791	3.4179	3.54553	22.4	24.0806	17.4532	14.7625	15.3111	14.4511	214.56	190.577	165.43	174.588	172.486	163.459	147.825	154.169	157.509	163.72	165.336	160.702	159.715	159.592	88.5689	65.4356	-27.7289	2.91111	6.78222	-121.013	-76.0667	7.76444	13.52	-3.88
3621	Cc1ccc2nc(Sc3cc([N+](=O)[O-])ccc3C(=O)O)n(Cc3ccccc3)c(=O)c2c1	8	25.122	340.218	6.99274	22	9	3	5	0	358.226	1568	10.458	7.99708	5.928	7.31073	4.2111	5.53363	4.35541	32	30.6923	26.1944	25.3	25.3772	20.432	258.734	243.194	230.68	240.905	239.831	157.718	144.149	147.812	149.628	157.862	155.208	156.382	152.204	153.359	47.2315	29.5167	0.0332732	-25.7685	-16.3887	-28.7076	32.6913	-2.31538	9.64098	-2.07289
1370	CCC1/C(=N/OC(=O)Oc2ccccc2)CC(c2ccccc2)N(C)C1c1ccccc1	17	24.7249	948.339	8.01786	18	5	2	3	0	206.222	1290	6.83333	3.08333	3.15436	3.43704	2.65741	2.70062	2.83147	21.5	24.127	16.8231	15.6826	13.5722	14.6107	224.018	193.351	174.723	161.997	157.213	159.666	143.651	150.837	155.525	158.344	159.065	160.827	162.088	157.537	74.12	43.72	13.68	-21.32	-29.44	-47.2	-28.2	-49.84	12.9033	1.28667
4284	Cc1cccc(N/N=C2\CCCc3ccccc3C2=O)c1	0	16.3609	194.392	6.01182	12	3	2	1	0	141.667	828	6.61538	3.3	2.65	3.63248	2.50313	2.62963	2.58796	21.2308	23.7561	17.3085	14.5859	15.0333	14.2833	227.842	199.029	161.656	158.918	186.178	159.455	143.944	148.743	154.633	161.306	163.769	163.357	156.468	152.064	46.1098	17.7403	5.82709	-52.8856	-62.3958	-4.21762	-12.5523	-33.6036	7.48849	-2.64629
2712	Clc1ccc(CSc2nnc(-c3ccccc3COc3ccc(Cl)cc3)o2)cc1	11	22.7653	396.243	7.04674	23	7	2	2	2	137.264	1868	8.1701	5.29072	4.5614	3.05031	2.94838	2.80253	2.70239	41.5111	32.7708	25.7957	21.6737	25.274	23.75	274.196	231.247	202.304	236.486	238.565	155.226	141.457	145.785	150.219	156.903	160.378	154.966	150.689	154.069	39.0072	-9.69546	-28.5967	0.801494	6.096	-33.6176	-35.0542	-29.5319	3.7037	-6.19753
2231	CSc1nnc(-c2cc(-c3ccccc3)nc3ccccc23)o1	13	18.223	179.914	6.02539	21	5	3	1	0	116.115	1128	8.73457	3.80597	2.25	3.2254	3.04303	2.79252	2.42998	31.3333	30.641	23.6806	21.7027	22.2836	17.0938	265.847	242.887	232.042	239.645	218.008	155.909	142.358	146.28	150.19	156.071	155.301	151.725	152.824	156.941	55.1986	56.513	-2.07407	-47.6495	-27.537	-49.5737	-90.5305	-61.9822	9.25231	4.31636
1207	COc1c(C(=O)O)c(O)c(/N=N/c2ccccc2)c2occc12	18	17.7228	343.882	6.67321	15	7	2	5	0	229.722	1006	11.4286	5	4.94	6.56349	5.05317	3.46893	3.87333	28.7429	29.3243	26.3731	28.3623	18	19.24	249.082	240.348	211.157	185.116	191.028	159.927	146.364	149.981	154.525	159.674	159.724	162.935	160.369	154.509	37.1902	30.8065	42.9576	48.2906	-103.081	-98.8286	-20.2033	-67.302	11.6188	6.80653
3455	Cc1ccc(C2NC3CCCCC3C3C2C(c2ccccc2)C(c2ccccc2)N2C(=O)NNC32)cc1	9	30.0986	501.541	7.52602	18	5	4	1	0	204.861	1448	5.53425	2.50571	1.75466	2.80632	2.39602	2.41341	2.20324	19.8356	23.2152	15.4036	14.5752	13.2114	10.8696	217.277	188.468	183.119	183.629	165.203	160.889	145.154	150.097	155.358	158.552	158.831	157.547	159.754	160.527	55.2526	11.4074	5.19122	35.9557	53.2561	-75.0426	-157.919	-126.038	17.4978	5.84781
3942	O=c1c2cc(Br)ccc2nc(Cc2ccccc2Nc2c(Cl)cccc2Cl)n1-c1ccc(/N=C/c2ccccc2Cl)cc1	5	34.1241	1312.61	8.63839	34	9	4	1	4	222.955	3598	8.12126	4.84449	4.39005	3.43008	2.83951	2.83054	2.69357	55.3538	32.8429	28.6933	27.3766	24.8977	23.4343	284.437	245.976	234	247.361	230.231	154.672	141.737	145.264	153.178	155.862	154.691	150.931	151.498	154.896	46.0623	-7.37309	-19.1855	-14.5217	-26.3573	-65.4886	-5.39466	11.6154	9.70888	-6.90249
594	c1ccc(C2=NN(c3ccccc3)C(c3ccccc3)C2)cc1	22	18.223	186.328	6.06042	18	2	2	0	0	106.139	872	6.39024	2.80851	1.97802	2.58875	2.34014	2.36348	2.21612	21.2683	24.4318	16.4845	16.4632	14.1596	11.5495	242.439	198.324	194.434	196.976	192.774	156.431	141.998	146.09	155.496	156.68	157.372	153.973	151.301	153.975	30.5521	-11.3391	-22.8495	-12.3557	-12.0048	-34.6573	-43.2552	-26.3438	7.06187	-1.03926
2990	O=C(Cn1c2ccccc2c2nc3ccccc3nc21)N1N=C(c2cc3ccccc3o2)CC1c1ccc(Cl)cc1	10	33.7151	857.255	8.16472	32	8	5	2	1	230.45	1872	9.13659	5.84214	5.32742	3.65793	3.39229	3.13443	2.87287	29.7143	29.0714	22.6797	21.2903	21.7317	20.2012	266.877	230.368	214.651	227.157	222.609	156.312	142.954	147.657	155.647	156.335	158.15	155.607	155.339	155.328	67.9846	21.8342	-20.6447	-54.0258	-12.1132	-19.7665	-60.3769	-23.6615	12.3034	-0.398841
57	O=C(CN1CCN(c2cc3c(cc2F)c(=O)c(C(=O)O)cn3C2CC2)CC1)N/N=C/c1c[nH]c2ccccc12	33	31.2552	11097.4	10.6754	19	11	6	4	1	391.583	1666	9.21212	4.26207	3.6014	5.93308	3.61728	4.091	3.11033	25.2424	26.8592	19.9255	18.4124	17.3517	15.2657	230.306	206.545	170.761	170.493	174.844	164.482	148.924	156.287	160.286	159.584	164.633	167.85	165.866	163.327	71.6492	14.7622	13.8806	36.5702	-25.0983	-132.347	-154.567	-54.9899	13.059	-5.33012
2455	O=C1N/C(=N\c2ccc([N+](=O)[O-])cc2)S/C1=C\c1ccccc1[N+](=O)[O-]	12	20.1842	209.508	6.30028	12	10	4	5	0	361.67	1358	13.1235	9.28205	7.49206	10.0464	4.85131	6.8858	5.15212	37.7222	34.6579	27.1096	26.2361	26.9038	27.2857	270.53	236.898	228.54	238.44	214.709	159.929	148.368	147.43	154.468	159.538	158.323	156.341	161.846	163.268	21.1715	14.7157	-6.43587	-64.0617	-39.2452	-2.53601	5.42112	-31.9609	2.05556	-4.69444
2910	CC(C)(C)OC(=O)N1CCN(c2ccc(N3C[C@H](CO)OC3=O)cc2F)CC1	10	21.8159	273.851	6.64221	6	9	3	5	1	315.229	1258	8.37037	2.83594	3.74757	5.83758	3.54661	2.42513	3.7171	23.2963	24.8929	17.2444	15.085	11.5469	14.165	200.814	177.442	161.028	159.586	123.819	168.176	150.073	161.863	162.802	165.946	168.481	163.262	169.546	174.151	95.1358	55.2593	-56.3333	-51	-195.481	43.5679	168.025	81.0494	11.4431	-3.8107
3824	O=C(O)c1cc(/N=N/c2ccc(S(=O)(=O)Nc3ccccn3)cc2)ccc1O	7	21.7167	242.181	6.51931	18	10	4	5	0	329.799	1434	10.963	5.47264	5.34375	7.85237	4.69016	3.62249	3.50376	34.1429	35.6364	25.9545	24.4713	19.6567	20.1875	255.011	222.113	201.219	218.015	207.004	160.731	146.519	149.711	157.243	163.802	162.692	157.869	156.028	155.956	-5.48476	19.587	-43.5515	-24.8012	-22.8642	-28.3399	3.62308	50.292	3.39909	-7.71655
818	NNc1nc2nc3c(c(-c4ccc(Cl)cc4)c2c(=O)[nH]1)CCC/C3=C\c1ccc(Cl)cc1	20	25.5009	474.664	7.32576	22	8	5	1	2	194.205	1770	8.10215	3.79289	3.18914	3.80794	3.04415	2.71907	2.63143	34.7059	29.3273	23.0244	21.816	19.2517	21.2061	258.743	232.019	232.908	209.945	193.174	159.499	146.536	149.049	153.546	155.973	151.86	157.07	158.339	161.972	51.0508	48.1879	53.7778	22.941	-57.9026	-158.272	-95.2428	-60.6228	10.9312	4.86813
3813	CCCCCCCCn1cc(Cn2c(CC)nc3nc(C(F)(F)F)ccc3c2=O)nn1	7	23.6973	4818.25	9.61157	15	10	6	1	3	370.479	1384	8.7931	4.53659	2.64957	6.38757	3.10168	4.15165	3.18803	23.8621	25.0333	16.9714	16.7042	16.9106	14.3846	205.871	168.691	167.45	159.506	158.571	172.742	151.513	163.497	166.855	169.716	167.017	168.333	169.984	173.596	127.864	234.923	168.27	46.9275	84.3341	76.7111	66.1463	-138.206	11.6593	9.89923
441	O=C1CSC(c2cc3ccccc3nc2S)N1c1ccc(Cl)cc1	24	19.1774	175.94	6.04561	16	6	2	1	1	138.258	1624	7.9286	3.60824	3.35119	3.7367	2.79139	2.59386	2.6778	43.8919	33.7	28.1786	28.5116	26.8028	19.9107	281.836	247.454	232.055	214.294	210.448	153.432	140.037	144.397	151.021	152.017	149.634	152.414	154.506	154.445	36.2873	-6.598	-58.2915	-32.0359	-16.6883	-1.4774	8.15012	-9.21037	6.51278	-1.79985
1082	O=C(NCCn1c(-c2ccccc2)nc2ccc([N+](=O)[O-])cc2c1=O)Nc1ccccc1Cl	19	25.7197	1428.05	8.45799	22	10	5	4	1	336.589	1636	10.1099	4.90542	4.67729	6.59978	4.54965	3.59218	3.25019	32.0784	29.5556	23.2564	21.9412	18.1074	17.2261	252.676	218.546	212.404	202.698	183.354	160.999	148.02	151.87	158.215	162.262	160.864	158.196	159.417	163.501	45.5143	38.798	-2.54567	-94.9314	-83.6612	4.27761	72.5616	71.352	7.34256	-1.95156
2278	N#C/C(=C/N)C(=O)Nc1nc2ccccc2s1	13	12.7564	123.741	5.34882	9	6	4	1	0	164.809	920	10.0978	6.38462	4.09091	6.59236	4.14749	4.58832	4.31818	36.8	33.3462	27.1087	27.9286	22.3077	18.1818	267.751	231.825	210.601	230.435	222.752	160.473	148.78	148.973	155.4	161.627	165.291	158.46	156.08	153.166	12.8256	5.07396	13.7998	-24.267	-31.6485	12.8412	-14.8811	-47.499	4.9776	-0.2736
1279	COc1cc(/C=C(\C#N)c2ccccc2C#N)cc(OC)c1OC	18	17.5159	155.84	5.9243	12	5	2	3	0	196.694	990	9.2	4.35955	4.82353	4.91736	3.63148	3.00031	3.60539	24.75	26.3415	23.9589	21.3837	14.382	17.5588	241.999	254.148	195.97	182.27	157.654	158.665	142.752	152.183	147.051	150.845	157.637	157.564	162.351	159.902	61.24	3.4	8.92	-63.56	-160.36	0.4	180.76	10.32	14.8725	5.8125
3569	CCOC(=O)c1nc(N)sc1Sc1nc2ccc(Cl)cc2c(=O)n1Cc1ccccc1	8	24.2365	350.511	6.99079	21	10	4	3	1	236.179	1962	9.05195	6.04368	5.39857	4.92039	3.46189	3.40969	3.98226	40.875	33.9216	29.2	32.31	28.9811	24.5413	265.463	240.001	252.307	252.439	244.025	158.134	144.763	150.714	153.59	155.657	154.345	152.119	151.436	155.99	52.2317	43.9084	32.6691	-63.5768	-16.9384	-33.8822	-18.9384	-37.3415	11.0534	7.58811
1893	Cc1nn(-c2ccccc2)c2c1C1(C(=O)Nc3ccccc31)C(C#N)=C(N)O2	15	22.4665	322.915	6.80701	17	7	5	2	0	220.312	1144	10	3.3211	2.70652	5.12355	3.76424	3.14373	2.82699	26.6047	28.4255	25.1584	25.5439	14.5505	12.1739	256.034	254.894	227.121	197.969	170.677	159.617	147.02	148.115	152.816	155.036	159.019	159.386	161.735	163.596	60.5863	68.3856	36.6869	14.5457	-110.049	-249.652	-40.5592	48.8096	19.5246	15.6019
2465	CCOC(=O)c1c(NC(C)=O)sc(C(N)=O)c1C	12	13.1821	115.888	5.34041	5	7	2	4	0	229.615	1020	9.01389	1.60938	0.296296	7.17545	5.50655	4.2908	3.13889	31.875	29.1562	27.7018	29.2167	12.3281	7.25926	220.088	220.798	190.395	166.24	127.836	164.225	149.457	156.769	157.632	152.445	161.56	161.784	166.427	174.669	62.0903	52.6549	-43.3711	-37.724	-109.591	6.46571	-78.2014	-20.1224	11.3125	8.83203
3578	Nc1ccc(C2(c3ccc(N)c(I)c3)C(=O)c3ccccc3C2=O)cc1I	8	21.4209	243.517	6.48844	18	6	2	2	2	215.441	6614	8.68411	3.48044	1.70747	5.25466	3.48617	3.46037	2.86188	161.317	40.1818	43.3776	34.3964	41.92	68.9412	301.534	279.779	249.31	274.677	222.208	152.765	141.687	140.202	145.007	148.165	149.771	146.32	152.085	158.746	28.2076	20.1458	28.8137	22.535	-75.2329	-116.429	-27.3187	-72.8114	15.4069	0.985128
3039	O=C(/C=C/c1ccc(Cl)cc1Cl)c1ccc(Nc2cc(=O)oc3ccccc23)cc1	10	23.6103	697.654	7.64634	22	6	1	3	2	218.899	1698	9.138	4.84722	4.45814	4.86443	3.52588	3.41283	3.02607	37.7333	30.6458	24.75	24	21.3	21.726	278.469	239.314	210.65	218.717	217.497	153.794	140.499	143.007	151.217	154.211	154.116	152.884	152.997	153.739	28.198	-10.3519	-37.2262	-26.0864	0.584667	-8.6592	-58.9727	-6.30986	4.12	-7.56
1993	COc1ccc(NCc2c(O)on[n+]2-c2ccc(OC)cc2)cc1	14	18.3728	286.65	6.53373	17	7	3	4	0	167.694	1033	8.66667	5.22059	4.4	3.99272	3.05251	3.54003	3.23034	24.5952	26.7273	20.8902	17.0435	19.1176	17.1385	222.733	209.142	160.149	166.011	184.873	163.323	149.813	156.506	158.051	161.319	162.303	164.101	165.508	160.695	56.3039	3.4059	-66.3515	-73.356	59.8231	33.6961	-46.288	-27.8866	11.5556	-1.11111
3858	Cc1ccc(-c2[nH]ncc2-c2nc(-c3ccccc3)c(-c3ccccc3)[nH]2)cc1	6	23.2013	282.271	6.70758	28	4	4	0	0	139.5	1116	7.38776	4.24779	3.31933	2.84694	2.74922	2.67404	2.51727	22.7755	25.6415	19.0093	18.6228	17.5929	14.916	248.63	221.89	210.383	222.951	211.904	157.412	144.176	146.882	151.021	157.855	158.755	153.851	153.333	157.18	47.8638	17.4494	10.2395	38.6593	-16.157	-64.3728	-67.7301	-76.7201	11.9134	1.11703
3744	O=c1ccc2c(O)cc(O)cc2o1	7	10.1468	53.1062	4.23466	10	4	0	4	0	169.139	586	12.5263	0	0	8.90205	8.64444	5	1	30.8421	30.2	24.3421	22.0571	6.5	1	255.985	229.972	154.921	123.29	78.9791	157.498	144.536	144.605	152.844	158.552	164.674	170.198	179.796	184.918	5.70914	-2.09418	-36.5789	5.39889	-32.4571	35.1108	-25.4294	8.07756	2.72853	-1.98615
1546	CC1(C)CC(=O)C2=C(C1)Nc1nc(N/N=C\c3ccccc3)[nH]c(=O)c1C2c1ccc([N+](=O)[O-])cc1	16	28.7161	1841.75	8.79941	18	10	6	4	0	358.146	1510	9.26667	4.67308	5.35507	5.9691	3.77041	3.3433	3.54006	25.1667	26.8438	20.0662	17.0108	17.1154	19.0652	234.715	215.826	201.415	201.465	178.968	162.399	148.31	150.932	154.014	163.56	161.943	158.922	165.056	161.083	75.3844	42.6889	44.3211	136.006	-139.479	-58.0967	-118.773	33.7133	11.9511	-4.37778
3322	N#Cc1cc(C(=O)c2ccccc2)n2ccc3ccccc3c12	9.5	18.2111	212.17	6.1903	19	3	2	1	0	174.694	894	9.2	4.44828	3.6383	4.99127	4.11514	3.5546	3.4539	25.5429	27.4737	21.675	21.0864	17.0862	15.5957	272.753	245.424	228.11	214.85	204.494	153.224	139.688	142.379	148.9	151.218	152.668	154.291	153.873	155.118	27.48	8.36	21.8	-13.84	-26	-33.36	-39.12	-45.48	8.83102	1.87837
2723	S=c1oc(-c2ccccc2COc2ccc(Cl)cc2)nn1CN1CCOCC1	11	22.0178	386.041	6.98556	17	8	3	3	1	139.408	1624	7.83436	4.30462	3.71392	2.90433	2.67985	2.64637	2.46171	33.8333	29.0784	21.1927	18.0789	22.8989	19.0115	241.081	199.872	183.415	219.264	210.751	160.413	146.413	156.727	157.441	161.017	165.081	154.638	151.413	157.741	51.0633	-27.513	-18.1967	33.6151	-13.0502	-77.0186	-33.1349	-38.352	5.92188	-3.01389
299	O=c1c2cc(Br)cc(Br)c2nc(-c2ccccc2)n1/N=C/c1ccc(O)cc1	25	22.1152	429.978	7.09335	22	7	3	2	2	195.268	3494	9.46669	5.0488	4.09891	4.76263	3.86193	3.29648	2.83239	85.2195	36.6136	34.3778	46.0575	31.4	29.4941	289.451	248.992	252.01	272.083	248.317	154.887	142.9	145.557	152.665	159.469	158.882	150.513	149.851	149.94	27.3072	11.8971	37.9458	17.6594	-49.5748	-109.534	-88.8409	-43.4743	6.33135	-2.08626
3278	COc1ccc(-[n+]2noc(O)c2CNc2nc3ccc(F)cc3s2)cc1	10	20.5631	189.729	6.20111	20	9	4	3	1	222.42	1351	10.6111	6.43939	6.34483	5.5605	3.41878	3.33698	3.87308	33.775	32.2326	25.725	23.0714	22.6061	24.9483	250.78	226.732	189.695	189.871	197.21	163.914	149.521	154.399	159.522	162.792	162.305	162.787	163.236	162.288	43.2089	-0.751111	-59.7333	-97.7733	23.2711	48.4533	52.04	-40.48	8.92	-0.64
2686	O=C(NC(=S)Nc1ccc(O)cc1)c1cn(CCO)c2c(cc(Cl)c3ncccc32)c1=O	11	24.9722	1356.87	8.37609	20	10	4	4	1	287.047	1806	9.59284	5.38365	5.01916	5.8581	3.91816	4.6526	3.83396	36.8571	30.6923	25.8661	26.931	24.7547	23.7241	260.926	236.132	226.301	204.001	193.373	159.088	146.944	150.252	155.089	157.008	154.001	159.262	161.859	160.472	29.3185	0.481194	10.5198	-10.4259	-36.0054	-56.74	-24.4669	-26.2767	10.09	3.37609
1273	Cc1cc(Sc2nc3ccccc3[nH]2)nc(SCc2nc3ccccc3[nH]2)n1	18	22.6559	201.652	6.33616	24	8	6	0	0	132.59	1542	8.24747	5.04505	4.40183	3.01341	2.62244	2.70237	2.77034	35.0455	32.5417	26.0778	26.6322	23.9054	22.4795	264.116	229.497	220.407	228.035	217.964	158.561	145.797	149.906	156.685	158.689	156.834	153.466	158.799	159.784	48.7222	4.83333	-86.6111	-56.5278	23.6944	58.8889	-2.22222	-92.8611	6.8595	0.669421
1233	Cc1ccc(NC2=Nn3c(nnc3-c3cc(F)c(Cl)cc3Cl)SC2)c(C)c1	18	21.5175	293.997	6.67682	17	9	5	0	3	177.32	1822	9.21108	4.51487	4.60335	4.32487	3.00576	2.47325	2.9995	44.439	34.1591	32.2558	26.8617	28.6197	27.371	269.678	249.324	209.393	212.429	218.878	162.794	147.877	152.459	157.022	163.624	163.264	164.305	158.926	157.545	70.256	43.5788	-48.8866	12.8128	28.1532	55.9796	18.7257	-41.9635	10.2362	-1.87924
569	CCCc1nn2c(=O)c3c4c(sc3nc2s1)CCCC4	22	16.1302	161.623	5.77841	12	6	3	1	0	123.785	1242	7.11111	1.3913	0.907407	3.5367	3.17034	2.657	2.12783	35.4857	31.9211	23.1839	27.7179	19.8043	15.3889	243.868	201.907	204.261	194.405	190.121	159.506	143.891	150.964	157.036	155.925	160.847	164.117	156.873	150.826	64.9819	91.127	126.887	20.8141	-117.454	-185.839	-134.617	-78.6621	11.5412	15.3143
1748	CCCCCC[C@@H](O)C/C=C\CCCCCCCC(=O)Nc1ccccc1O	15.2	20.0867	26752.6	11.224	6	4	1	3	0	233.611	1144	3.97015	0.965753	0.963768	3.48673	2.20309	2.08162	2.05072	17.0746	19.3284	10.4162	9.85799	9.24658	9.02174	183.122	132.455	128.186	128.131	125.062	164.514	146.03	153.227	163.474	164.608	164.104	163.725	164.046	164.177	40.403	21.3393	38.125	24.0789	15.2845	-39.5988	-40.1005	-33.2375	4.32836	-5.79728
2547	Cc1nn(-c2ccccc2)c2c1c(-c1ccc(Cl)cc1)nc1nncn12	12	21.1085	270.84	6.55704	24	7	6	0	1	125.033	1280	9.47705	3.37821	2.723	3.20598	3.02722	2.61918	2.4168	32.8205	30.4651	25.3571	24.4943	16.6538	19.3803	267.045	244.663	246.807	225.995	173.275	160.221	147.702	152.635	156.267	159.288	157.267	154.844	165.379	163.71	58.6775	50.363	26.1732	-6.89863	-81.0401	-124.484	-72.4923	-11.4515	11.2452	6.84287
1087	CCOC(=O)c1cnn(-c2nc(-c3cccs3)c(C#N)c(=O)n2C)c1N	18.82	19.8726	225.496	6.37382	16	10	6	3	0	257.392	1332	10.7111	4.24904	4.87923	6.43481	4.51249	3.59926	4.57524	33.3	31.7857	28.0779	29.3293	19.5747	19.1449	247.932	236.068	230.904	205.169	177.327	163.717	150.524	158.169	159.235	164.954	159.369	162.422	165.915	162.788	76.0578	100.631	36.4578	-65.4089	-154.351	-68.4356	-25.9867	-14.7511	16.125	9
4079	Cc1ccc(-c2nc3sc(-c4ccc(Cl)cc4)nn3c2-c2nc3ccccc3[nH]2)cc1	4	25.3915	375.786	7.06042	29	7	5	0	1	138.037	1670	8.55424	5.87681	4.42652	2.93695	3.00124	2.90656	2.67047	35.5319	31.6538	25.8725	23.9038	26.0435	23.4409	276.15	245.255	239.082	271.153	253.719	156.031	143.736	147.059	152.151	158.685	158.233	153.483	154.081	150.519	52.6847	26.9262	30.8527	64.0042	18.6472	-62.6948	-124.112	-141.538	10.7623	2.44907
54	O=C(/C=C/c1ccccc1)Nc1ncc(-c2ccc(Cl)cc2)[nH]1	33	17.856	352.032	6.69663	17	5	3	1	1	150.978	1162	8.04338	5.08163	4.78025	4.08047	3.39583	3.45406	3.51303	31.4054	28.2051	19.9091	18.1781	22.6531	20.6	256.994	207.895	185.54	192.952	204.983	158.337	145.374	148.411	156.021	159.027	161.753	163.344	160.599	159.035	18.3911	-18.4732	-35.6292	26.2986	21.2327	-25.1657	-6.41709	-38.7779	2.38934	-6.81446
3956	Cc1ccc2oc(=O)c3c(c2c1)Nc1cc(C)c(C)cc1N3	5	17.8726	139.236	5.72463	16	4	2	2	0	149.528	890	8.21053	2.81818	1.49091	3.93494	3.11111	2.78114	3.01111	23.4211	25.8049	22.1628	16.7379	14.7576	12.7636	237.896	236.78	172.98	188.682	176.593	158.799	144.78	149.486	149.957	158.001	161.98	160.562	157.005	157.059	72.2188	62.4571	-1.34072	14.9695	5.20776	-88.0083	-71.6593	-135.795	14.1025	1.47922
2125	Cc1ccc(C#N)c(N2CCN(CC#CCOC(=O)c3sc4ncnc(N5CCCCC5)c4c3C)CC2)c1	14	29.7031	14026.3	10.8837	15	9	6	2	0	252.17	1754	7.09206	2.29356	2.85859	3.60243	2.76342	2.42303	2.61216	25.0571	26.2703	19.4615	16.7435	12.5795	14.0606	225.23	199.917	176.373	180.719	139.493	162.001	145.956	157.406	156.417	158.746	161.979	155.381	165.382	166.088	101.272	39.5238	23.6236	5.67574	-138.154	-76.0998	17.2902	-34.2902	17.6416	4.72
3200	CCN1CCN(Cn2nc(C34CC5CC(CC(C5)C3)C4)n(-c3ccc(Cl)cc3)c2=S)CC1	10	26.1584	780.518	7.82311	11	7	5	0	1	127.498	1724	4.81893	2.04207	1.60292	1.93179	2.00914	1.86044	1.78051	26.1212	24.6056	16.0539	13.1897	18.2011	14.3789	211.547	175.648	165.068	188.759	179.288	163.466	146.95	156.054	158.39	165.575	165.261	159.419	158.569	156.575	79.4424	22.2147	11.7616	65.5694	-11.2018	-92.5603	-120.64	-85.7419	14.843	-0.801653
2143	Cc1cc(/N=C2\C(=O)N(Cc3ccccc3)c3ccc([N+](=O)[O-])cc32)ccc1N1C(=O)c2ccc(Cl)cc2C1=O	14	32.0598	491.117	7.58298	24	10	4	5	1	401.728	1904	10.8408	6.01824	4.79475	6.80894	4.20446	4.17032	3.21896	32.2712	30.1562	25.25	22.5133	21.8881	18.4653	268.734	248.287	229.709	226.575	225.04	156.909	143.562	147.571	151.353	156.919	155.741	154.787	151.97	158.646	68.9439	57.4642	23.5082	-49.262	-83.8294	-144.953	-34.3528	19.8685	13.8452	0.652973
1777	COc1ccc(C(C)NC(C)C(O)c2ccccc2)cc1	15	15.7632	115.996	5.49549	12	3	1	2	0	139.167	848	5.36364	1.86667	1.85185	3.16288	2.19128	2.33765	2.23594	19.2727	21.8	15.2178	12.3565	11.2222	10.5679	204.871	179.359	136.672	130.387	145.6	161.762	145.361	153.039	157.49	159.079	161.97	164.051	160.616	161.88	36.75	-10.25	-46.25	-64.75	2.25	3	-21	3.75	9.61415	-5.34659
1750	CC(C)CCC[C@@H](C)[C@H]1CC[C@H]2[C@@H]3CC=C4C[C@@H](OC(=O)CCCCCCCCC(Br)CBr)CC[C@]4(C)[C@H]3CC[C@@]21C	15.1	32.3168	221548	13.7435	0	4	0	2	2	219.42	4010	2.85032	0.950401	0.868529	2.07	1.58263	1.68838	1.69549	37.8302	21.9083	16.4132	10.7666	10.5	10.0556	187.949	159.312	122.388	118.641	130.933	163.235	143.098	151.604	156.685	159.523	162.816	165.013	161.415	163.633	78.3875	22.3221	-45.4584	-39.0744	17.9555	26.557	-20.3684	-29.4026	23.5774	-1.83126
4009	O=C(c1cccnc1Nc1nc2ccccc2s1)N1CCNC(Cl)C1Cl	5	20.5916	166.51	6.07057	15	9	5	1	2	155.264	1770	8.04035	4.29404	3.38088	3.78693	2.92939	2.66692	2.55098	43.1707	33.3182	28.8542	26.5165	24.7073	25.3649	261.066	218.577	221.708	225.408	206.73	161.331	148.026	155.343	159.995	161.241	159.873	159.766	161.057	158.916	31.8006	5.57135	22.365	-13.6236	-29.5381	-47.5197	-11.2373	-22.8319	5.5348	-0.727543
3007	FC(F)(F)c1cccc2c(N3CCN(C4CCCCC4)CC3)c(-c3nnc(S)n3-c3ccccc3)cnc12	10	30.5257	603.867	7.73835	21	10	6	0	3	343.367	1830	8.46729	4.04117	4.62073	5.12488	2.68155	2.65259	3.49545	27.3134	26.9028	18.9777	18.797	17.7462	20.0447	229.07	196.837	186.956	172.613	178.462	167.139	147.808	158.155	160.076	162.52	161.287	165.614	165.667	164.916	105.04	150.475	123.436	145.547	110.568	15.9946	-45.96	-129.555	13.9096	9.46937
3774	C#CC[n+]1ccc2c([nH]c3ccccc32)c1C(=O)/C=C/c1ccc(OC)cc1	7	21.7871	934.545	7.86968	19	4	2	2	0	188	1109	7.87234	4.47727	4	4	3.27832	3.27841	2.93951	23.5957	25.94	20.6139	18.2232	17.75	16.0111	248.392	232.456	192.59	192.08	208.015	156.38	142.969	148.504	150.316	153.505	156.156	156.361	154.099	153.806	43.2345	-8.94522	-33.6089	-29.3803	4.86102	-7.21865	-53.2775	0.651879	13.1019	2.8565
2843	Clc1ccc(OCc2ccccc2-c2nnc(Cc3cccnc3Cl)o2)cc1	11	22.0178	314.409	6.78031	23	7	3	2	2	140.844	1624	8.91186	5.16975	4.46111	3.27544	2.9962	2.76056	2.67891	37.7674	30.9348	24.3778	21.7065	21.7639	21.0875	268.158	228.088	205.436	225.286	230.632	157.614	143.565	148.825	153.319	158.859	162.335	156.945	150.699	156.479	41.2477	-12.9519	-38.7749	-3.84949	1.46552	-34.0143	-19.7294	-14.3041	4.48026	-5.13034
2033	Cc1cc(=O)oc2cc(Oc3nc(Nc4ccc(N5C(=O)CSC5c5ccccc5C(=O)O)cc4)nc(N(C)C)n3)ccc12	14	35.05	1554.69	8.83063	28	13	6	6	0	378.087	2076	9.92063	5.84547	5.29778	5.40124	3.60682	3.99289	3.46504	29.6571	29.64	24.5658	22.4483	20.6093	19.24	247.032	235.669	206.66	197.048	201.705	160.371	146.385	154.002	153.024	158.766	158.075	161.414	160.084	158.105	109.995	91.1783	-68.1798	-29.8131	-137.593	-64.8188	-75.8278	-13.3202	16.9755	2.4498
410	Cc1cc(=O)oc2cc(Oc3nc(Nc4ccccc4)nc(N4CCN(c5cccc(Cl)c5)CC4)n3)ccc12	24	31.2791	502.816	7.5812	28	10	6	3	1	237.116	1844	8.74383	5.93663	6.03993	3.70494	3.0456	3.05049	3.13319	28.8125	28.1884	20.8533	19.4076	21.2344	21.6172	244.877	211.596	182.908	191.047	205.28	160.811	146.661	155.114	157.859	159.958	163.888	163.651	164.647	156.939	88.3221	55.3853	-20.1697	1.56121	-44.0681	-5.67479	-79.5058	-17.9923	9.66528	-2.15918
1700	COc1ccc(/C=N/N=c2\scc(C3=CC(=O)C=CC3=O)n2-c2ccc(Cl)cc2)cc1	16	24.1676	903.512	7.93769	17	8	3	3	1	231.481	1728	9.49041	6.16107	5.06897	4.92513	3.42787	3.75442	3.4339	36.766	31.94	26.1667	25.2143	29.1512	22.7126	270.598	242.773	225.647	236.095	240.356	156.181	142.698	147.605	152.715	155.165	156.369	154.667	153.64	155.208	45.1482	-19.3855	-49.6603	-13.13	47.7061	-5.94881	-5.9712	-39.9536	8.75283	-1.50883
508	COc1cc(/C=C/C(=O)c2ccc(O)cc2)ccc1OCc1nnc(-c2ccc(Cl)cc2)o1	23	25.6627	424.878	7.24572	23	8	2	5	1	246.589	1626	9.64625	5.42708	5.15404	4.74209	3.72913	3.33798	3.21549	31.2692	29.0727	23.2571	19.789	20.25	19.3523	254.828	226.982	194.007	202.415	194.329	157.715	143.56	148.727	152.678	156.532	158.67	156.995	159.219	157.279	52.1883	-9.43144	-51.1072	-69.0661	-19.1443	30.1761	29.8256	-21.1256	8.1875	-7.3125
4073	Cc1cc2c(cc1C)Nc1c(c(=O)oc3ccccc13)N2	4	17.0561	129.742	5.60749	16	4	2	2	0	144.75	852	8.68571	3.07407	1.62791	4.13571	3.14323	2.8323	2.96512	24.3429	26.5789	22.5	17.7692	14.9815	13.3488	244.411	236.123	173.116	187.303	179.456	158.221	144.814	148.478	151.173	157.476	162.88	159.869	155.782	155.666	57.831	51.4237	-0.64898	-5.21143	6.46939	-49.9192	-52.7559	-105.079	11.8996	1.08653
3767	Cc1cc(C2CC2)n2nc(-n3nc(C)cc3C3CC3)cc2n1	7	18.3609	134.059	5.68674	14	5	5	0	0	103.222	876	6.92683	2.23529	1.72414	2.51762	2.23711	1.94118	2.33333	21.3659	24.9778	18.7471	19.0225	11.9882	15.5517	219.682	195.758	187.356	152.54	143.462	164.028	148.217	156.395	165.41	160.116	160.091	164.506	171.74	155.698	90.1035	82.7258	19.2635	-61.5628	-109.944	-67.5265	-16.8126	-173.109	12.5806	3.61452
4135	C/C(=N\n1c(-c2ccccc2)nc2cc(Cl)ccc2c1=O)c1ccc(O)cc1	4	22.1152	320.368	6.79909	22	6	3	2	1	201.811	1372	8.85466	4.44556	3.19062	4.58661	3.69582	3.34086	2.64511	31.1818	28.6596	23.9167	22.6458	21.21	16.8349	260.941	232.784	221.755	234.377	228.684	157.294	143.697	147.513	154.722	159.766	159.253	154.945	150.235	153.951	48.4978	32.1241	16.1467	-8.05418	-30.5338	-138.206	-139.52	-18.933	9.79132	-0.853306
3896	Cc1ccc(Cc2nn(CC3NNC(=O)N3Cc3ccccc3)c(=O)n2CCc2c[nH]c3ccccc23)cc1	6	31.1578	515.126	7.60539	26	9	7	2	0	266.778	1582	7.42857	4.52941	3.86264	3.81111	3.12177	3.2454	2.78953	22.6	25.3467	17.4765	14.9316	17.0642	16.1978	225.787	194.288	169.272	189.86	177.048	162.655	148.807	155.33	157.918	163.216	165.846	161.403	164.189	162.561	76.5592	7.08163	-101.245	-90.3796	84.1086	63.5045	0.524898	-69.0914	13.65	-7.3
1906	O=C(CCNC12CC3CC(CC(C3)C1)C2)c1cccc(Br)c1	15	17.856	791.3	7.46213	6	3	1	1	1	129.613	2046	4.58842	2.38796	2.44981	2.81767	1.82494	2.34635	2.40791	44.4783	25.3673	15.0405	11.481	15.65	17.1739	216.434	163.829	133.271	130.203	155.069	160.508	142.772	148.771	157.398	165.103	163.678	164.468	161.575	155.796	30.0568	-20.052	-32.0534	11.9798	11.4369	46.1784	4.33741	-24.357	4.67675	-9.0397
564	Fc1ccc(Nc2nc3c(-c4ccc(F)cc4)nc4ccccc4c3o2)cc1	22	22.644	392.594	7.0024	25	6	3	1	2	253.278	1178	11.4146	7.14286	5.93671	6.17751	3.70442	3.92136	3.54712	28.7317	29.4889	23.2308	22.4828	22.1299	19.4051	268.826	233.639	239.487	241.895	232.508	161.456	144.569	148.139	158.259	160.075	157.968	155.856	155.035	156.49	35.5973	12.58	-25.4123	-27.7656	-52.8626	-124.841	-17.21	36.9179	5.49851	-0.490184
3282	COc1cc2c(cc1OC)C(N1CCC(n3c(=O)n(Cc4ccc([N+](=O)[O-])cc4)c4cc(Cl)ccc43)CC1)CC2	10	31.8125	704.393	7.94363	21	10	4	5	1	325.172	1916	8.07894	2.71458	3.33745	4.57989	2.45603	2.23746	2.36681	26.9859	26.7368	19.7088	17.2217	14.1239	16.1481	228.567	207.167	172.587	169.165	154.74	161.643	146.256	154.484	155.932	158.401	159.636	159.342	162.28	162.921	99.3148	44.8073	-28.0921	-134.572	-141.941	-81.3038	56.858	74.2392	19.7191	2.87245
1967	Cc1cc(C)n(C(=O)COC(Cn2nnc(-c3ccccc3)n2)c2ccc(Cl)cc2)n1	14	24.3174	222.181	6.53489	22	9	6	2	1	201.783	1524	8.53086	5.7062	5.79098	3.88044	3.06853	3.32918	3.22175	29.3077	28	21.0818	18.5378	21.1154	22.8812	237.822	205.493	181.044	173.676	199.297	163.062	148.808	155.56	160.466	163.404	164.121	168.678	163.898	158.501	81.4815	15.8519	-64.4321	-41.9012	-34.0247	-20.7037	-5.17284	11.3704	9.57655	-4.07544
723	COC(=O)CCCSc1nnc(-c2cccc(-c3ccccc3F)c2)o1	21	19.8964	670.363	7.46333	17	7	2	3	1	235.115	1328	9.40568	6.53234	5.8869	5.46778	3.0944	4.05385	3.79112	30.8837	29.6222	21.8182	20.3977	22.5224	22.9464	243.834	210.558	197.402	197.171	191.868	161.451	144.297	151.044	155.072	160.316	161.898	159.755	162.433	159.8	64.598	49.6211	-17.5002	-106.877	-98.9546	10.3904	82.1248	13.2749	7.50838	1.22877
3273	CCOc1ccc(NCn2nc(C34CC5CC(CC(C5)C3)C4)n(C)c2=S)cc1	10	22.6633	2181.51	8.71739	11	6	4	1	0	127.187	1338	5.24904	1.88889	2.11621	2.19288	1.87542	1.91358	1.85987	23.069	23.8387	15.7765	12.508	14.6825	12.789	207.523	174.773	161.114	145.802	153.26	163.358	147.063	154.767	157.139	165.901	161.438	166.269	163.644	161.764	78.7536	25.3123	-50.0831	-49.547	-20.36	-14.6824	-37.5106	46.9034	14.541	-0.292509
1930	Cc1ccc(N2NC3NC(=N)C4CCCCC4C3N2)cc1	15	16.9871	169.166	5.87282	6	5	5	0	0	115.194	844	5.13636	1.84615	1.4507	2.61806	2.03395	2.09046	2.06808	19.1818	22.7234	14.2154	12.1206	11.5769	10.507	197.904	163.62	129.526	134.384	151.298	166.773	151.767	155.615	163.22	168.061	171.633	170.525	164.211	159.174	44.25	18	-21.5	-19.25	-24.5	-41.75	-33	-25.25	9.62965	-2.56818
2941	COc1ccc(-[n+]2noc(O)c2CNc2ccccc2Cl)cc1	10	17.7347	208.854	6.17454	17	7	3	3	1	150.255	1219	8.62118	5.43739	4.0119	3.95409	3.13483	3.54599	3.41529	32.0789	29.1	23.961	19.9024	26.1111	20.75	240.148	214.706	176.955	182.398	199.83	162.124	149.293	154.065	158.628	162.465	161.564	162.597	164.246	160.263	41.631	7.89217	-42.7163	-62.8184	34.5925	51.042	-20.1335	-82.6859	9.06233	-2.21607
1103	CCc1nn2c(=O)c3c4c(sc3nc2s1)CCCC4	18	15.4231	122.821	5.45258	12	6	3	1	0	119.535	1204	7.65278	1.13333	0.814815	3.73546	3.35165	2.47616	1.66187	37.625	33.2857	25.0385	29.3188	19.3	14.2222	251.553	212.296	204.502	194.799	182.554	158.94	143.852	150.676	156.194	154.37	161.026	163.962	156.209	148.371	61.2153	82.3889	105.653	0.784722	-123.535	-177.424	-116.306	-33.4236	10.9873	13.4062
3029	O=C1N/C(=N\c2ccc(Cl)cc2)S/C1=C\c1ccc(Cl)cc1	10	17.2583	162.235	5.8775	12	6	2	1	2	133.736	1582	8.4892	5.16498	4.62092	4.17926	3.57769	3.62541	3.25073	49.4375	35.6765	28.3846	26.4107	34.1136	31.7647	293.589	237.509	248.279	239.106	224.63	154.046	141.5	144.218	152.243	155.33	152.169	152.779	158.111	156.501	10.6344	-24.041	-15.2889	11.2851	31.0274	-21.7812	-37.1167	-27.8016	0.695312	-6.01172
1563	Nc1nc(COC(=O)c2ccco2)cs1	16	11.492	63.122	4.55053	10	6	2	3	0	136.281	878	10.715	5.45455	2.89474	5.92527	3.40101	4.02567	3.46881	38.1739	34.3333	23.973	23.4706	28.0455	23.7368	251.865	198.136	200.826	192.269	209.527	161.159	148.575	153.344	160.937	159.22	163.399	160.246	160.073	158.515	19.674	-1.29322	-11.9695	-33.7017	-22.9368	13.3749	-3.50977	-34.1598	2.63327	-2.52552
3400	Cc1ccc(C2=CC(c3c(-c4ccccc4)[nH]c4ccc(C)cc34)c3c(nc4oc(=O)c(C#N)c(N)c4c3N)O2)cc1	9	33.9219	564.41	7.77087	31	8	5	3	0	297	1686	9.07463	5.71364	5.22807	4.43284	3.40849	3.0976	3.22356	25.1642	27.1918	23.1146	21.1838	19.9	19.2456	254.364	249.072	222.348	236.368	223.258	157.411	144.213	145.887	148.205	155.295	155.333	151.709	153.031	154.068	91.1018	94.2894	50.7211	75.6788	-19.1009	35.0018	-99.8741	-108.818	23.4647	8.3464
2741	O=C1N/C(=N\c2ccc(Cl)cc2)S/C1=C\c1cccc([N+](=O)[O-])c1	11	18.7415	180.825	6.073	12	8	3	3	1	247.703	1470	10.9426	6.90201	8.68056	7.28539	4.14504	4.23486	6.94023	43.2353	35.1389	27.4928	25.8281	33.8958	28.2	281.381	236.096	245.662	230.173	228.301	157.16	145.124	145.91	153.436	157.979	154.238	155.809	158.256	161.142	15.4726	-5.73536	-10.2993	-13.8334	7.66923	-47.3918	-23.4166	18.7264	0.885813	-5.84429
3372	CCOC(=O)C(C)(O)Cc1nc2sccn2c1[N+](=O)[O-]	9	15.2719	171.274	5.83641	8	9	3	5	0	272.621	1132	10.8013	4.20635	2.42157	8.26126	4.79364	5.36214	3.38154	34.303	31.7647	24.2754	22.3243	18.5397	17.2647	226.408	199.465	197.363	159.695	136.586	165.666	151.021	157.518	161.887	167.313	161.262	167.22	168.943	166.882	63.6062	72.9049	-12.9627	-80.0733	-86.4176	61.4988	45.1377	-72.5723	9.77778	3.11111
1433	O=C(CN1CCN(c2cc3c(cc2F)c(=O)c(C(=O)O)cn3C2CC2)CC1)N/N=C/c1ccccc1O	17	29.2838	12080.9	10.7077	16	11	5	5	1	413.556	1608	9.39683	4.21277	3.47101	6.56437	3.72724	4.33767	3.19646	25.5238	26.7761	20.1184	18.4583	17.2908	14.971	226.908	204.012	170.913	171.819	173.068	164.945	148.962	156.769	160.908	160.194	165.251	167.617	165.546	163.479	66.1975	15.4074	19.5062	42.7407	-26.6173	-145.346	-149.704	-61.7407	12.0408	-6.55102
2819	COc1ccc(C2=NN(c3nc(-c4ccc([N+](=O)[O-])cc4)cs3)C(c3ccc(-c4ccc(Br)cc4)o3)C2)cc1OC	11	32.5316	639.069	7.871	28	11	4	5	1	300.443	3100	9.64862	5.88838	5.37734	4.69442	2.66966	3.08625	2.87043	48.4375	32.5942	26.8394	24.7584	25.3586	23.7273	262.122	238.24	203.603	213.844	224.316	157.438	144.167	149.382	153.024	154.27	157.267	155.111	156.703	155.058	79.9727	9.66761	-79.9144	-114.4	-34.3759	66.6479	34.9067	-18.3914	15.2844	-2.04639
3114	FC(F)(F)c1cccc(NCn2nc(C34CC5CC(CC(C5)C3)C4)n(-c3ccc(Cl)cc3)c2=S)c1	10	28.6948	1362.3	8.46969	17	9	4	0	4	317.616	1946	8.09917	3.05692	3.37059	5.20682	2.57107	2.42609	2.4654	31.9016	27.8485	18.9503	16.0545	19.7232	17.3293	236.471	193.234	194.02	202.477	182.885	166.158	146.88	154.557	156.645	167.709	163.772	160.179	162.229	158.943	71.9322	97.464	45.2541	52.6736	-54.6011	-148.124	-61.0654	104.075	7.04891	-6.27224
1910	O=C(CCNC12CC3CC(CC(C3)C1)C2)c1ccc(O)cc1	15	17.856	842.162	7.52443	6	3	1	2	0	165.479	886	5.02128	2.43902	2.58333	3.52083	2.23706	2.5935	2.67708	18.8511	21.78	12.4	8.90123	12.3902	14.1389	202.128	159.055	125.721	126.73	150.388	162.004	144.027	149.235	157.939	165.602	164.532	165.029	162.677	157.195	32.1521	-16.5075	-39.7565	14.5541	35.4722	70.9244	-17.5446	-26.4346	5.57537	-9.97782
229	O=C(O)c1cn(C2CC2)c2cc(N3CCN(Cc4nnc(S)o4)CC3)c(F)cc2c1=O	27	24.9722	861.558	7.89014	15	11	5	4	1	316.333	1578	10.1041	3.94157	3.46017	6.2026	3.58995	4.10638	2.97048	30.9412	29.2545	21.6179	19.518	18.181	15.5094	234.274	209.586	177.413	175.951	172.728	165.552	149.128	158.703	161.834	158.809	163.771	166.842	165.424	164.055	80.6319	36.1266	-0.754396	31.3611	-34.4689	-189.517	-151.19	10.7766	10.1038	-3.38754
3831	N#CC1C(=N)N2C(NC(=O)C3C(c4ccccc4)CSC32)C(C#N)C1c1ccc([N+](=O)[O-])cc1	6.6	26.7819	485.963	7.40991	12	10	6	3	0	369.531	1626	9.34156	4.73881	5.78182	6.84317	4.10217	3.67676	4.6303	30.1111	29.5862	21.6601	21.9148	18.3955	20.6727	249.85	220.432	196.08	185.326	183.434	160.603	145.689	147.343	154.435	158.208	158.081	162.99	163.72	161.202	34.0765	-5.97836	-44.6845	-36.3865	29.8305	4.80308	-45.2228	-7.45557	10.7531	-3.58025
4399	N#Cc1c2c(c(N3N=C(c4ccccc4)CC3=O)[nH]c1=S)CCCC2	0	19.7347	214.913	6.28653	12	6	4	1	0	181.653	1216	8.20596	3.91441	3.49206	4.43055	3.37473	3.42059	3.21987	29.6585	27.8636	20.9903	22.32	17.7027	17.8413	251.966	212.266	200.813	194.706	191.301	158.671	144.699	148.84	156.118	157.254	161.098	160.131	157.745	154.896	57.8844	49.0897	31.665	-22.8454	-78.1826	-95.4152	-58.9248	-27.6608	9.56871	3.55622
1937	Cn1c(NN)nc(-c2ccc(Cl)cc2)c(C#N)c1=O	14.9	14.2681	111.003	5.35141	12	7	5	1	1	174.978	1040	9.84845	3.13008	0.901587	6.03371	4.40436	4.12235	2.60617	35.8621	30.5333	27.4138	23.8361	21.0244	19.6857	252.758	244.305	205.853	181.494	176.312	164.846	152.965	158.035	156.158	165.632	159.571	167.376	166.914	172.361	36.0385	33.1856	14.4142	-44.4302	-39.5081	-90.518	-56.1735	24.5861	9.55886	0.680143
1880	N#CCc1ccccc1C#N	15	7.73773	43.4598	3.86715	6	2	2	0	0	114.306	428	9.05882	0	4.12264	6.72386	8.8125	6	3.10306	25.1765	26.1176	18.3438	16.3667	7	19.184	263.811	220.991	150.329	125.266	86.9662	157.243	140.424	144.017	151.646	156.214	171.664	186.347	197.641	159.627	11.9412	-12.6436	-13.4256	-4.43945	-2.37716	-2.76817	-6.22837	0	2.41176	-2.17301
3893	COc1ccccc1/C=C/C(=O)c1ccc(Nc2nc(Nc3ccccc3)nc(Nc3ccccc3)n2)cc1	6	30.4341	531.551	7.63678	30	8	6	2	0	244.778	1564	8.24615	5.46565	4.65248	3.76581	3.31019	3.29644	3.13002	24.0615	26.3043	19.4348	18.2214	20.1221	17.9291	243.536	210.05	195.764	206.794	214.319	159.643	146.216	151.088	156.573	159.458	162.916	159.67	159.525	158.495	56.4024	8.11834	-23.2722	-9.30178	1.93491	25.8935	-117.207	-102.817	9.01444	-4.57964
3539	O=C(Cn1c2ccccc2c2nc3ccccc3nc21)N1N=C(c2cc3ccccc3o2)CC1c1ccc(O)cc1	8	33.7151	857.255	8.16472	32	8	5	3	0	265.639	1648	9.375	6.06587	5.46552	4.15061	3.51335	3.33733	3.11015	25.75	28.0141	21.6516	20.3899	20.2934	18.7069	258.699	226.264	210.736	224.365	216.857	157.029	143.652	147.826	155.823	156.811	158.499	155.756	156.006	156.021	66.1094	19.4844	-40.7031	-60.8906	-3.625	-23.9375	-56.6406	-5.53125	13.6384	-0.443604
2809	N#Cc1c(-c2ccc(Cl)cc2)csc1NC(=O)c1cc2ccccc2[nH]c1=O	11	22.0058	203.271	6.34416	21	7	3	2	1	234.759	1588	9.90123	7.17346	6.69091	5.86897	4.614	4.45444	4.61538	39.7	33.2558	26.9318	26.7528	32.4333	27.8727	288.258	253.339	225.77	242.596	251.614	154.045	141.709	142.649	149.299	154.306	155.09	154.691	154.907	154.639	20.243	-1.52741	-4.54222	-0.424198	23.8904	-27.4163	-19.3605	-24.8494	6.0675	-5.32
305	CC1CC(C)CN(c2nc(-c3ccc(NCC(=O)Nc4nc5ccc(F)cc5s4)cc3)nc(N3CC(C)CC(C)C3)n2)C1	25	34.4357	1021.76	8.3879	21	11	8	1	1	303.559	1984	6.8103	3.51087	2.4557	3.70194	2.68291	2.72967	2.44491	24.1951	25.5402	16.9722	14.7114	18.7283	14.6878	215.872	179.484	179.67	169.63	206.868	165.311	148.117	157.011	159.667	169.857	161.004	170.063	155.07	161.6	124.032	103.77	92.6415	77.0054	18.0331	-163.881	-252.11	-198.013	15.1132	-2.07971
1359	Cc1ccc(OCc2ccccc2-c2nc(COc3ccc(Cl)cc3)cs2)cc1	17	22.7653	396.243	7.04674	23	5	1	2	1	138.453	1606	7.18468	3.83816	3.4669	2.82557	2.5584	2.42118	2.34716	32.7755	29.1923	21.9412	19.4486	20.7826	19.2979	256.386	219.073	194.834	216.735	211.049	155.083	140.36	146.707	151.323	154.711	156.236	151.827	151.163	156.92	41.2637	-33.3345	-53.3823	0.774271	30.4741	-36.8385	-1.5549	7.77864	6.95918	-6.06122
1316	O=C(c1cc(-c2ccc(Cl)cc2)n(-c2ccc(F)cc2)n1)N1CCN(C(=O)C2CC2)CC1	17	25.6103	308.612	6.89524	17	8	4	2	2	280.311	1580	8.58528	4.82348	4.52525	5.19094	2.85412	3.45414	3.39761	29.2593	27.6379	20.3615	18.9313	19.7097	20.5909	239.543	200.733	193.159	182.572	190.341	162.941	146.4	154.946	161.586	161.196	159.288	160.902	162.62	155.501	68.6837	28.2994	-25.5319	-132.112	-11.9269	69.1806	6.37476	-74.406	8.75034	-7.75995
2068	COc1ccc(Cc2ccc(OC)c(C3SC4C(=NN(Cc5ccccc5)C4c4ccc(F)cc4)N3c3ccc(C)cc3)c2)cc1C1SC2C(=NN(Cc3ccccc3)C2c2ccc(F)cc2)N1c1ccc(C)cc1	14	60.5208	1686.3	9.44519	48	12	6	2	2	454.757	3420	7.38083	4.48641	3.74547	3.47143	2.46034	2.61357	2.49558	26.1069	27.1408	21.8813	20.2032	20.3391	17.2702	243.226	224.703	213.977	215.913	218.963	158.806	142.922	149.203	152.414	155.824	154.381	155.114	151.928	154.319	140.447	-40.2566	-150.216	-4.39359	127.203	-25.7038	-159.351	-135.912	33.7181	6.35732
2545	COc1cccc(Nc2nc(Nc3ccc(C#N)nc3)nc(Nc3cccc(OC)c3)n2)c1	12	25.4558	314.151	6.9438	24	10	8	2	0	218.5	1368	9.54717	6.4717	6.18519	4.12264	3.43674	3.31971	3.4393	25.8113	27.8036	21.7885	19.7727	21.0189	20.6759	240.412	218.704	189.474	210.159	205.22	163.688	150.353	157.654	159.741	161.775	168.663	162.766	165.751	163.949	63.1385	2.1691	-48.2684	20.4614	-14.178	37.1969	-20.566	-46.3354	9.37914	-1.18049
2103	Cc1ccc(-n2c(Sc3nnc(N)s3)nc3ccc(Cl)cc3c2=O)cc1	14	20.7415	225.685	6.37465	21	9	5	1	1	167.651	1734	9.32878	5.6966	3.61988	4.41187	3.55009	3.38071	3.20779	45.6316	36.5122	31.1039	30.7284	32.726	23.0526	281.665	259.93	253.641	281.38	256.772	157.868	146.052	148.625	151.547	156.675	154.76	150.355	151.752	158.328	40.0842	18.2383	10.8026	8.68749	22.7996	-50.8394	-48.8068	-87.5867	8.44321	1.83102
4508	CC(=O)OCCn1nnn(-c2ccccc2)c1=O	0	13.6419	179.095	5.7757	11	7	4	3	0	185.083	796	10.3333	4.91892	2.68571	6.16944	3.97083	5.02102	3.03333	26.5333	27.9677	19.9322	19.6667	18.5135	12.3429	221.804	184.859	165.479	181.048	169.779	167.169	153.34	161.865	166.635	166.948	173.233	167.567	164.479	169.612	57.4444	33	-48.1111	-64	-22.8889	-14.2222	-10.8889	-32.7778	5.44444	0.666667
3859	COc1ccc(-c2cn3nc(-c4ccc(N(C)C)c([N+](=O)[O-])c4)sc3n2)cc1	6	22.1152	282.139	6.67202	20	9	5	3	0	237.67	1394	9.78765	8.11538	6.31481	5.28156	3.67613	3.68744	3.92164	30.9778	30.6042	25.6966	21.2404	29.0577	25.1481	245.284	243.605	185.605	172.376	242.056	161.613	148.438	155.973	151.806	157.957	162.39	167.356	156.144	158.583	73.9834	22.5013	-24.6101	14.529	6.64999	-64.9975	16.5892	-22.8202	14.357	2.94272
988	COC(=O)[C@H](C)NC(=O)[C@@H](NC(=O)[C@H](C)NC(=O)c1cc(-c2nc3cc(C)c(C)cc3[nH]2)ccc1O)C(C)C	19	29.8307	3377.56	9.48588	15	11	5	6	0	401.694	1672	7.75676	3.46269	3.26601	5.4283	3.38729	3.4848	3.49179	22.5946	24.1579	19.071	16.1095	14.9602	13.7833	208.937	195.227	165.534	170.251	160.466	164.747	148.98	156.451	158.808	164.548	165.045	162.221	163.082	165.758	128.172	103.627	-56.6706	-119.167	-14.1417	-42.6472	-35.3294	50.5179	22.2159	-3.72681
1562	O=c1cc(Oc2nc(Nc3ccccc3)nc(N3CCCCC3)n2)c2ccccc2o1	16	24.7368	352.912	6.99762	22	8	5	3	0	205.222	1286	8.88462	6.01961	5.13514	3.94658	3.86621	3.22658	3.12588	24.7308	27.0179	18.552	19.0593	21.451	20.018	235.758	190.668	204.815	217.823	216.553	161.771	147.074	154.934	160.17	165.027	164.168	163.717	162.14	156.754	77.9556	104.206	99.6612	88.5562	-45.7293	-108.722	-140.997	-104.472	6.75	4.4375
2554	CC(=O)CSc1nc2sc(C(N)=O)c(C)c2c(=O)n1-c1ccccc1	12	19.4247	266.919	6.50324	15	8	3	3	0	247.09	1478	9.07222	3.67843	2.92771	6.17725	4.19179	3.52353	3.27443	36.95	32.7619	31.775	30.9885	23.8	16.2651	255.968	252.259	231.606	227.285	212.833	158.35	144.514	149.515	151.304	154.081	157.813	155.126	149.799	154.323	61.2061	40.0525	-37.5333	28.5297	-109.938	-55.2317	-81.2431	-12.7047	13.4512	8.76812
4290	C=C1CCCC2[C@]1(C)CC[C@H](C)[C@@]2(C)Cc1cc(C=O)cc(O)c1OS(=O)(=O)O	0	22.7158	349.492	6.92119	6	7	0	6	0	328.424	1462	6.48211	2.5266	2.71676	5.56652	2.53948	2.80343	4.4047	24.7797	27.9344	16.8988	13.5726	15.8777	16.3584	205.848	198.106	136.457	133.162	154.265	161.984	143.037	150.605	150.671	156.59	161.692	164.506	160.466	163.652	33.5275	113.431	-28.2363	49.625	221.989	33.3185	6.98787	-153.759	17.6426	-3.5056
1761	CCn1cc(C(=O)O)c(=O)c2cc(F)c(N3CCN(Cn4cnc5ccccc54)CC3)cc21	15	26.2365	558.36	7.51893	19	9	5	3	1	321.5	1406	8.98246	3.30935	3.02344	5.64035	3.28613	3.64468	2.7283	24.6667	26.4918	19.8521	17.7143	14.9424	12.9766	227.249	207.037	169.653	165.921	160.485	164.863	148.582	158.822	159.361	161.161	163.639	165.237	165.867	165.341	78.9911	41.4411	7.34103	4.75038	-33.8923	-166.741	-123.227	33.767	15.4906	1.55371
772	CC1CCC(NC(=O)NCCn2c(-c3ccccc3)nc3ccc([N+](=O)[O-])cc3c2=O)CC1	21	25.7602	1740.56	8.65588	16	9	5	4	0	338.778	1392	8.03333	4.0493	3.52555	5.6463	4.1344	3.29225	3.00162	23.2	25.1429	16.6392	15.3533	15.5845	14.3796	218.097	180.037	173.491	183.627	165.537	163.897	148.444	154.18	160.546	165.659	165.154	161.154	161.509	166.018	80.27	99.3578	82.6089	24.8189	6.62889	41.0511	89.7578	11.8522	9.7175	-1.28
3335	COc1ccc(-c2nc(SC)n(C)c(=O)c2C#N)cc1	9.17	14.8658	133.33	5.58597	12	6	3	2	0	174.587	1048	9.04377	3.74242	2.6087	5.29051	3.49005	3.62788	3.24134	31.7576	30.1765	28.2	24.1	19.1818	14.1739	245.237	258.922	202.153	170.785	191.449	160.333	145.113	155.775	149.238	158.733	153.398	163.564	155.228	166.751	68.5015	53.4265	-18.3658	-63.7214	-20.7919	-50.6063	-46.8575	14.7246	13.7778	4.11111
2751	CC1(C)C=Cc2c(c3c(c4ccc(=O)oc24)OC(C)(C)C=C3)O1	11	18.8872	144.762	5.808	10	4	0	4	0	166.319	958	8.43902	1.44554	0.805556	4.05657	3.4302	2.64191	2.71065	23.3659	25.6364	20.4608	16.6325	11.3663	11.2361	231.022	220.737	213.601	192.207	142.199	158.035	141.789	149.355	151.632	157.512	150.722	151.51	163.774	157.282	99	86	-24	87	-42	-147	-234	-84	13.3546	2.60857
2210	CCOC(=O)c1sc(NC(=O)C(F)(F)F)nc1C	13	13.3904	100.997	5.20288	5	9	2	3	3	352.621	1122	14.7572	6.07692	7.88571	13.0601	4.82336	6.29167	10.3869	41.5556	35.1481	34.3778	31.6429	19.7179	19.5143	235.375	214.603	213.128	192.855	148.325	177.861	153.573	170.876	171.47	162.285	169.62	163.042	174.077	201.406	61.7613	117.278	27.3855	-59.1157	-75.8215	33.3873	26.1404	44.2472	4.33333	3.33333
2736	S=C1NNNN1c1ccccc1	11	9.2209	50.9012	4.11221	6	5	4	0	0	57.9859	712	7.52222	0	0	2.8993	2.06145	1.52963	1	35.6	30.2857	22.35	20.8788	4.7	1	239.166	191.114	170.946	123.95	69.5023	165.96	160.031	161.008	161.514	161.023	165.803	170.099	176.7	184.918	12.1344	-12.2078	-23.4778	-10.1856	-18.9567	-0.975556	11.5222	8.26889	2.89	-1.63
2779	O=C(c1cccnc1Nc1nc2c([N+](=O)[O-])cccc2s1)N1CCN(CCO)CC1	11	23.4201	487.549	7.288	15	11	6	4	0	310.392	1510	9.36889	4.88667	5.41392	6.20785	3.23305	3.03981	3.7498	30.2	29.6792	21.2542	20.8492	18.99	21.2308	231.814	200.192	176.155	182.274	187.144	164.48	150.52	158.011	161.143	162.375	164.434	165.41	162.742	158.88	49.3676	25.506	52.8059	46.57	2.22684	-21.2603	2.47111	15.5015	9.5552	2.4544
1090	Cc1cccc2c1CC1Sc3nnc(C)n3N=C21	18.6	14.8254	100.461	5.19756	11	5	4	0	0	84.1145	932	7.94815	2.58333	0.8	2.80382	2.28408	2.54167	2.22222	31.0667	30.4242	26.0448	19.6957	14.0833	9.1	248.292	235.011	170.736	173.976	166.095	160.654	146.457	151.326	154.303	157.273	160.674	162.079	161.73	170.512	63.0978	39.7323	-62.8928	-72.2548	8.15111	2.74914	-50.9822	-31.2741	11.32	3.32
4362	S=C1NNC(c2cccnc2)N1/N=C\c1ccccc1OCCOCCOCCOc1ccccc1/C=N\N1C(=S)NNC1c1cccnc1	0	38.7861	1304.34	8.78289	24	16	10	4	0	268.639	2518	8.03359	4.14508	3.5034	3.1237	2.64272	2.67132	2.5171	29.2791	28.044	21.0995	19.4316	20.6528	17.7143	232.684	194.758	181.182	186.522	192.722	163.22	150.661	157.983	160.569	161.111	163.641	161.293	159.777	157.83	65.6354	-86.7277	-32.695	-5.1926	-4.32035	-4.62977	-53.2604	-65.7779	12.3175	-2.75825
4040	COc1cc(-c2cc(=O)c3cc4c(=O)cc(-c5cc(OC)c(OC)c(OC)c5)oc4cc3o2)cc(OC)c1OC	5	30.9271	479.963	7.56	26	10	0	10	0	322.444	1746	10.5152	5.16667	5.35135	4.88552	3.82254	3.25062	3.31607	26.4545	27.9429	27.874	24.1429	16.5111	18.3176	237.539	266.219	199.356	192.983	167.428	158.579	143.4	153.998	147.385	150.117	156.409	155.169	161.579	158.63	133.111	38.2222	-13.5556	-86.8889	-163.222	35.1111	248.667	34.4444	30.1157	17.1736
1368	CN(C)CN1C(=O)NC(c2ccccc2)(c2ccccc2)C1=O	17	17.8495	192.423	6.0926	12	5	3	2	0	194.174	942	7.47619	1.71429	0.797468	4.62318	3.71408	2.58503	2.18987	22.4286	24.7045	19.7423	17.6441	11.5714	9.41772	223.253	212.204	205.512	168.76	146.914	161.913	147.084	156.806	152.507	163.808	156.569	161.92	162.271	159.895	50.9705	38.2993	66.1179	60.4989	-112.154	-235.615	-82.1587	-42.7596	14.5408	5.92347
4186	NNC(=O)c1cc2ccccc2[nH]1	3	9.928	61.0918	4.37474	9	4	3	1	0	117.611	544	8.45455	1.125	0	5.34596	3.875	3.5625	1.83333	24.7273	26.3043	19.1364	15.9756	10.375	3.66667	228.988	197.546	150.034	138.827	119.031	164.754	154.473	152.678	158.423	164.802	167.158	169.227	173.551	176.44	12.4876	2.3719	-13.3636	-38.4628	0.297521	-12.843	-28.0165	17.8512	5.01033	-1.35537
1520	Cc1c(C(N)=O)sc2ncn(Cc3ccccc3)c(=O)c12	16	16.4584	229.484	6.17777	15	6	3	2	0	190.115	1084	8.89542	3.03774	2.95	5.5916	4.39398	3.04158	2.89722	31.8824	30.2222	26.6479	21.6962	17.2453	18.8	250.481	237.314	189.976	185.041	179.448	159.347	145.831	151.239	149.859	157.756	163.077	160.526	161.008	153.819	37.5932	11.8435	-20.3945	-11.4006	-67.8889	22.1672	-56.2826	-33.1419	10.0519	1.45761
374	COc1cc(/C=N/n2c(-c3ccccc3)nc3c(Br)cc(Br)cc3c2=O)cc(OC)c1OC	24	25.4605	535.181	7.47653	22	9	3	4	2	211.573	3736	9.3872	4.41779	5.74007	4.06872	3.25143	2.73468	3.1119	71.8462	34.2727	35.3981	42.0531	23.3864	28.5364	264.564	260.933	221.092	217.363	191.709	157.907	144.382	152.837	151.208	156.068	159.512	154.415	159.934	156.526	78.1924	33.8529	60.3961	-41.2836	-193.295	-67.966	99.0652	82.7579	17.9375	9.5625
2937	N#CC1=C(N)OC(c2ccc(Cl)cc2)=CC1c1c(-c2ccccc2)[nH]c2ccc(Cl)cc12	10	25.4605	383.951	7.11367	21	6	3	1	2	181.705	1742	8.26959	4.61527	3.72896	3.70827	3.13164	3.12672	3.16227	35.551	29.8302	23.9391	22.5	21.6939	22.2424	275.391	246.771	237.784	237.323	216.66	155.015	142.269	142.792	149.342	152.459	151.969	150.943	154.305	158.616	33.2882	2.08773	-19.5819	-23.379	7.94401	10.8229	-55.6523	-87.3134	10.3594	-0.506872
3678	COc1ccc(-n2c(Sc3nnc(N)s3)nc3ccc(C)cc3c2=O)cc1	8	21.3392	256.911	6.54198	21	9	5	2	0	185.09	1548	9.30688	6.45726	4.19277	4.40691	3.49442	3.60221	3.2342	36.8571	33.5333	28.7683	27.2747	28.8205	21.6747	260.297	253.671	228.887	239.67	247.277	159.472	146.848	151.561	151.395	156.025	154.826	156.259	153.662	154.199	56.7317	18.4543	-15.1509	-15.5432	38.8614	-55.8559	-36.4475	-54.3744	12.7092	4.80612
1481	CCOc1ccc(NC(=O)CSc2nnc(Cn3cnc4ccccc43)o2)cc1	16	22.6559	2091.74	8.71046	20	9	5	3	0	196.365	1432	8.96759	4.89372	5.18966	4.09093	3.04023	2.97522	3.43646	29.8333	29.6863	22.1429	19.4742	22.9565	24.8103	240.072	203.747	186.615	178.707	190.635	161.858	147.842	154.794	159.704	159.982	160.057	162.494	163.238	161.971	69.033	14.2338	-112.037	-56.2128	60.8605	90.9286	16.6707	-94.1046	7.74089	0.453125
1517	Cn1cc(CCC(=O)NCc2c[nH]c3ccc(OC(F)(F)F)cc23)c2cc(Cl)ccc21	16	24.6444	572.92	7.48215	18	9	3	2	4	359.873	1618	10.4321	5.20117	4.32702	7.19747	3.53826	4.09019	4.44736	32.36	29.0189	20.8125	18.6532	20.4316	19.0682	242.116	216.695	169.157	168.967	178.896	167.727	148.575	158.967	154.412	159.7	165.378	166.857	166.552	175.082	61.9793	88.1733	-82.4583	-59.7314	53.6686	102.361	30.3284	-140.428	5.1828	-0.1084
2817	Cc1ccc(-c2nc(COc3cc(=O)oc4ccccc34)n[nH]2)cc1	11	19.8964	216.664	6.29464	21	6	3	3	0	177.222	1038	9.7	6.41667	5.74074	4.43056	3.5	3.77222	3.22171	25.95	27.814	21.3012	19.1529	20.0333	18.8148	247.305	220.368	182.203	193.905	189.268	159.323	145.494	150.888	154.466	158.786	161.857	160.404	166.184	163.395	52.6175	16.875	-30.9325	16.0125	-10.9725	-45.5375	20.75	-7.485	7.07688	-1.78125
2015	Sc1nnc(COC(Cn2nnc(-c3ccccc3)n2)c2ccc(Cl)cc2)o1	14	22.0582	234.22	6.48588	22	10	6	2	1	150.81	1630	9.69566	6.42092	6.53947	3.50721	3.08097	3.2312	3.21543	37.907	32	23.2584	20.4674	24.5412	28.0789	257.744	210.692	191.707	201.335	209.212	162.091	148.97	154.339	159.355	162.956	165.522	166.679	164.097	160.055	56.0645	-11.3838	-49.9277	-12.6393	-5.3119	-55.1789	-13.836	0.782705	3.48026	-5.33964
3834	CCCCCCCCCCCCO[C@H]1C[C@@H](O)[C@H](O)[C@@H](CO)O1	6.4	16.4014	9662.05	10.0089	0	5	0	5	0	208.861	1004	4	0.832	0.854701	3.54002	1.87624	1.87733	1.90954	17.0169	19.2203	10.8395	10.0943	8.44	8.47863	166.513	123.835	112.133	112.762	112.681	167.23	147.639	156.756	165.649	166.619	167.515	166.457	166.352	166.666	22.9153	9.35335	56.5007	23.8822	14.3686	-17.4019	-8.05401	-8.6412	5.66102	-2.62425
1581	COc1ccc(Cc2ccc(OC)c(C3SC4C(=NN(c5ccc(Cl)cc5)C4c4ccc(F)cc4)N3c3ccc([N+](=O)[O-])cc3)c2)cc1C1SC2C(=NN(c3ccc(Cl)cc3)C2c2ccc(F)cc2)N1c1ccc([N+](=O)[O-])cc1	16	63.625	1697.47	9.50376	48	20	8	6	4	662.99	4196	9.54552	5.40523	4.94933	5.39016	2.62137	2.84879	2.96073	34.1138	30.9701	25.6867	23.8596	22.7738	21.8893	261.428	240.512	229.106	223.964	228.384	159.17	144.487	148.361	153.495	155.347	152.709	154.485	152.239	154.503	119.119	-16.8334	-165.813	-160.789	25.9947	37.7336	-84.1147	32.5274	25.7991	0.383502
120	COc1ccc(-n2c(S)nnc2Cn2nc(-c3ccc(C)cc3)n(N)c2=O)cc1	30	22.7819	268.903	6.65906	22	10	7	2	0	201.277	1430	9.1106	5.45594	4.53548	4.19327	3.281	3.52839	3.51745	29.7917	28.8824	24.551	20.2124	24.0115	21.6506	236.879	227.249	189.59	180.992	196.464	164.155	151.667	158.114	157.898	162.639	163.705	165.422	167.234	163.573	86.4759	35.5265	-64.8369	-76.2563	83.363	76.8741	-55.0964	-158.246	15.7409	-0.016059
2521	Cc1c(C(N)=O)sc2nc(S)n(-c3ccccc3)c(=O)c12	12	16.4869	153.543	5.77592	15	7	3	2	0	186.197	1302	9.55478	2.5625	2.31707	5.81866	4.26435	2.82485	2.76634	40.6875	33.7059	32.7692	33.6571	22.3542	14.7561	269.607	264.828	213.782	207.503	196.642	157.141	144.744	148.254	150.615	150.769	160.436	156.987	151.716	158.618	45.7859	29.1647	-14.6449	-18.0775	-117.038	-19.6954	-47.8657	32.3428	11.7207	6.20898
111	Cc1c(-n2c(Cc3ccc(Cl)cc3)nn(Cc3nnc(S)o3)c2=O)c(=O)n(-c2ccccc2)n1C	30	27.8291	581.22	7.61789	27	12	7	3	1	252.893	1928	9.7257	4.95438	5.18175	4.59806	3.42033	3.29232	3.37059	35.0545	30.8305	25.3729	22.0222	21.2517	20.8344	251.194	230.124	206.694	207.201	197.383	162.275	149.257	156.875	159.919	160.334	163.076	160.575	160.846	161.746	104.36	57.7071	-54.3886	-33.5911	33.3655	-107.898	-86.812	21.0917	15.7722	4.15603
1785	O=c1cc(-c2cccc(Cl)c2)oc2cc3oc(-c4cccc(Cl)c4)cc(=O)c3cc12	15	24.2365	314.646	6.85006	26	6	0	4	2	219.455	1710	10.6002	6.11111	5.88889	5.22512	4.79556	3.6447	3.05562	40.7143	32.6087	27.4639	26.6383	27.9189	24.8281	295.498	260.071	247.384	251.676	242.019	150.957	137.961	140.678	148.161	151.01	150.358	150.064	150.747	152.092	31.9148	-2.73934	-11.3499	12.6817	17.8044	-7.05719	-52.8816	-18.8802	4.322	-4.66213
1795	COC(=O)[C@H]1[C@H](C(=O)OC)[C@H](C(=O)c2ccc(Cl)cc2)N2N=CC=C[C@@H]12	15	19.8726	255.511	6.49878	6	8	2	5	1	260.311	1372	9.57221	2.70881	2.24074	6.05374	4.16073	3.63696	2.98695	31.907	28.6889	23.0098	22.5789	15.9914	15.8444	237.774	219.542	201.506	184.592	164.061	161.484	145.632	154.065	156.174	159.652	159.496	160.742	163.957	159.783	50.6977	-10.0958	-54.5936	-25.4836	110.816	-58.6579	-244.755	-44.2902	12.6247	4.94321
2984	O=C(NC(=S)Nc1ccc([N+](=O)[O-])cc1)c1cn(CCO)c2c(cc(O)c3ncccc32)c1=O	10	26.4553	2082.77	8.86523	20	12	5	6	0	401.014	1694	11.1852	5.97024	5.59298	7.86301	4.23579	5.22666	4.61888	33.2157	30.5185	24.9569	25.2419	22.4018	23.9263	254.068	234.671	218.219	195.185	187.579	160.967	149.159	151.133	155.706	158.421	155	160.842	162.637	162.703	32.9017	17.8902	22.9138	-49.4812	-74.468	-49.1871	-42.3233	-31.0931	10.316	2.49827
2257	CCOC=C1C(=O)NC(=S)NC1=O	13	9.43968	67.6607	4.47687	0	6	2	3	0	153.791	806	10.4021	0.242424	0.0555556	7.3234	4.23188	3.34596	1.34877	38.381	30.9524	25.2821	32.4194	11.3636	12.6667	235.517	200.717	172.054	163.494	114.701	164.432	152.66	159.887	161.01	164.7	161.916	165.176	176.935	163.941	30.7619	24.3366	17.3855	19.1877	-41.2477	-88.5815	-56.5024	30.3522	3.90476	2.36281
515	O=C1c2ccccc2C(=O)C12Nc1ccc(Br)cc1C1OCCC[C@H]12	23	20.4068	205.051	6.23955	12	5	1	3	1	192.946	2202	8.41627	2.31217	1.22516	4.70601	3.03164	2.61695	2.04899	53.7073	30.5556	24.2119	22.3281	18.9694	24.5397	257.648	223.339	204.763	193.886	164.663	156.14	141.282	145.677	152.922	155.826	156.003	154.666	158.23	159.729	39.6313	30.3324	58.3894	-40.8184	-98.0154	-116.766	-46.3456	10.1993	12.2255	5.19512
1924	CCSc1nnc(-c2cc(-c3ccccc3)nc3ccccc23)o1	15	18.9301	216.13	6.25135	21	5	3	1	0	120.365	1166	8.16524	3.9	2.42857	3.08627	2.98241	2.75141	2.40026	29.8974	29.5952	22.0864	22.0649	22.4429	17.5	257.851	227.058	227.651	232.467	222.405	156.65	142.5	146.995	152.093	155.101	157.305	153.309	152.084	155.031	60.5957	75.1731	49.4703	-39.6098	-55.6068	-68.8465	-95.7299	-77.9094	9.69822	7.92899
2487	O=C(Cn1nc(Cc2ccc(Cl)cc2)n(CCc2c[nH]c3ccccc23)c1=O)NNS(=O)(=O)c1ccc(Br)cc1	12	31.6043	714.029	7.95722	26	13	6	4	2	347.577	3316	8.76745	5.50558	5.58065	5.4309	3.27713	3.71211	3.97433	51.8125	35.2206	25.1533	21.2152	24.3082	22.8487	254.853	213.169	182.101	194.887	202.54	160.715	147.19	152.813	157.49	161.688	165.171	162.405	160.704	161.782	23.9324	14.4071	-60.9738	-101.168	89.5059	21.1021	-37.4089	48.4798	6.75	-11.0625
2483	COc1ccc2nc(C)cc(-n3cc(CN4CCN(c5ccccc5)CC4)nn3)c2c1	12	24.6964	744.873	7.74462	21	7	6	1	0	155.944	1248	7.19298	3	3.18947	2.73587	2.45227	2.31653	2.37982	21.8947	25.1148	17.7519	15.4	13.5462	15.4	221.91	200.337	167.152	157.205	152.971	163.225	148.303	157.684	159.257	159.522	162.367	165.559	168.049	159.193	86.3244	0.702062	-56.9591	7.16528	18.7353	-52.6941	-57.1471	-62.1111	13.8199	-0.271468
1455	CCCCCCCC/C=C\CCCCCCCc1nnc(Nc2ccccc2)s1	16.3	21.2132	56707.4	12.0104	11	4	3	0	0	135.503	1342	3.44771	1.11358	0.964377	1.9927	1.74498	1.72654	1.69098	19.7353	21.3333	10.5872	10.811	10.3926	9.9313	193.043	133.818	137.662	137.52	136.254	163.569	145.388	152.927	162.916	163.399	163.38	163.335	162.713	162.54	49.0587	20.8147	52.8887	26.1999	28.8645	4.0842	-18.1764	-23.9603	4.92842	-0.475346
2737	Cc1cccc(OCc2ccccc2-c2nnc(SCc3ccc(Cl)cc3)o2)c1	11	22.7653	388.019	7.02576	23	6	2	2	1	142.453	1618	7.6677	4.79404	4.33198	2.96777	2.86144	2.64614	2.68906	33.7083	29.902	23.0404	19.1402	21.9634	21.2683	257.326	223.198	191.96	225.96	219.855	156.22	141.766	147.001	149.538	157.648	161.177	154.984	152.937	152.822	54.2811	3.09148	-31.2302	6.49374	-14.6965	-10.027	-12.7965	-42.8716	6.74089	-4.53689
925	N#Cc1c(-c2ccc([N+](=O)[O-])cc2)cc(-c2ccc(Nc3cc(=O)oc4ccccc34)cc2)nc1N	20	28.4387	338.957	7.10681	28	9	5	4	0	356.861	1490	10.9811	5.41525	5.90476	6.73323	3.61387	3.65443	3.76878	28.1132	29.1754	23.1681	21.125	18.4492	18.181	265.01	245.084	216.654	215.338	199.978	157.831	145.41	145.319	152.041	154.704	155.019	154.91	157.912	159.474	41.7027	19.2268	-42.9897	-71.1727	-77.6444	-34.1289	-11.6088	71.513	9.19082	-5.3293
698	CC(C)N1CCN(c2nc(Oc3cccc4cccnc34)nc(Sc3nnc(-c4cc5ccccc5oc4=O)o3)n2)CC1	21	34.6933	540.67	7.75142	31	13	8	4	0	270.281	2010	9.60064	7.84483	6.82677	3.91712	3.08078	3.51687	3.43988	29.1304	29.7733	22.5688	21.1047	29.569	27.189	245.254	215.194	181.821	203.027	245.355	161.605	147.119	156.268	157.884	161.529	164.808	164.176	160.369	159.255	120.957	113.749	90.9173	161.274	225.52	86.9218	-93.9446	-173.059	14.3195	3.83701
1890	CCn1cc(C(=O)O)c(=O)c2cc(F)c(N3CCN(CN4CCOCC4)CC3)cc21	15	23.489	746.266	7.71369	10	9	4	4	1	311.194	1316	8.10526	2.60526	2.68333	5.45955	3.07077	3.30921	2.74722	23.0877	25.0333	17.7823	15.7605	12.5789	12.3833	206.122	187.247	155.758	153.067	133.408	167.47	149.918	162.519	162.192	162.515	166.135	164.915	170.296	169.946	77.5596	18.8504	28.7341	79.8504	27.2521	-67.313	-47.3684	-22.144	14.0388	1.93075
167	CCOP1(=O)C(C)NN=C2N(N)C(=O)C(C)=NN21	28	13.7465	95.6467	5.14845	0	10	6	3	0	197.958	1014	9.00935	0.42623	0.125	5.99874	3.51004	2.44536	2.29167	30.7273	34.3235	28.6575	23.5714	7.81967	4.22917	198.795	193.828	170.548	121.304	104.183	173.39	159.295	167.791	171.406	176.227	167.296	173.599	172.043	177.796	50.0664	112.924	51.4147	-144.601	-123.006	-114.564	-15.3627	64.3117	15.3067	6.3719
1381	O=C(CC(Sc1ccccc1)c1ccco1)c1ccccc1O	17	17.7751	149.602	5.84088	17	4	0	3	0	179.587	1148	7.65242	4.53012	3.48	4.60479	3.11005	3.37238	3.2442	29.4359	28.439	21.8	22.5556	18.7229	15.8133	251.028	208.251	199.853	201.507	200.538	154.653	139.946	142.942	151.2	151.52	153.163	154.094	153.288	154.241	18.1003	-20.7129	-46.6162	-26.3581	35.865	31.826	-13.7991	-60.4938	4.88166	-4.28994
1870	O=C(/C=C/c1ccc(Cl)cc1)C1C(=O)NC(=S)NC1=O	15	15.2749	183.843	5.90723	6	7	2	3	1	214.436	1312	10.3465	6.25309	5.30476	7.39433	4.0653	4.16141	4.54932	45.2414	33.2667	26.2656	28.0351	26.1389	27.7143	276.621	227.21	197.893	222.737	225.426	157.48	145.534	147.479	155.136	158.845	158.894	156.37	154.344	160.988	10.727	-25.1514	-14.4216	65.0171	-23.5542	-18.889	2.88689	-50.2922	0.678954	-6.75505
522	O=c1cc(Oc2nc(Nc3ccccc3)nc(N3CCN(c4cccc(Cl)c4)CC3)n2)c2ccccc2o1	23	30.4626	480.648	7.51014	28	10	6	3	1	232.339	1806	9.0427	6.18519	6.14931	3.80883	3.28001	3.09317	3.17746	29.6066	28.7424	21.0556	20.5034	21.6279	22.0156	248.958	209.569	194.882	199.85	207.785	160.579	146.766	154.835	158.826	160.709	162.842	163.412	164.238	157.448	72.7662	49.0588	13.0476	37.8221	-10.5477	-28.3736	-57.0624	-50.1042	7.34184	-1.15157
3627	S=C1NNC2C3C4CCCCC4NC(c4ccccc4)C3C(c3ccccc3)C(c3ccccc3)N12	8	29.2822	467.916	7.42922	18	5	4	0	0	152.764	1602	5.14921	2.17302	1.52552	2.18234	2.11252	2.07289	1.9509	22.8857	24.1316	16.0783	15.6024	14.3402	11.5016	225.084	189.681	189.775	187.323	169.543	159.573	144.703	148.994	155.195	157.455	157.494	156.533	157.852	159.374	40.2631	-11.8815	3.90857	34.2122	24.8334	-78.9656	-133.101	-87.6048	15.2784	6.38449
3638	CC(=O)N(C(C)=O)c1nc(-c2nnc(S)n2-c2ccc(C)cc2)cs1	8	19.4651	188.66	6.15624	16	9	5	2	0	204.197	1476	9.34383	5.57672	4.93409	5.10493	2.79047	3.34343	3.83703	36.9	32.119	28.3553	29.7791	24.873	24.2881	252.136	243.103	208.687	196.071	205.485	161.106	147.234	155.32	158.024	156.132	158.499	160.46	159.068	165.118	88.5555	51.1356	-69.7314	-14.9588	-45.3546	-4.23136	32.6428	-89.6781	13.9012	4.9675
3059	C/C(=N\Nc1nc2ccccc2[nH]c1=O)c1cc2cc(C)ccc2oc1=O	10	21.4486	205.701	6.31967	20	7	4	3	0	224.528	1124	9.86047	5.74286	5.94366	5.22158	3.77402	3.89921	4.29851	26.1395	27.7174	23.1196	19.268	20	18.9155	246.282	227.871	183.914	196.194	200.946	160.369	146.84	151.198	155.843	161.793	162.028	161.555	160.56	160.633	67.113	50.7561	-12.7274	-26.3142	-38.0022	-97.8707	-58.0757	26.8534	10.4181	-2.31585
344	O=C1CSC(c2cc3ccccc3nc2S)N1c1cccc(Cl)c1	25	19.1774	172.474	6.02571	16	6	2	1	1	138.258	1624	7.9286	3.58216	3.34105	3.7367	2.85279	2.55808	2.69887	43.8919	33.7	28.1786	29.6279	21.6197	24.4821	281.836	247.454	238.236	223.384	202.471	153.432	140.037	144.397	151.021	152.01	149.474	152.129	154.598	154.445	36.2873	-5.598	-53.5138	-31.141	-19.0696	-5.54747	7.93791	-7.67017	6.51278	-0.799854
2624	CCCn1cnc2sc(C(N)=O)c(C)c2c1=O	12	12.9228	105.981	5.19389	9	6	3	2	0	173.587	940	8.21481	0.791667	0.709677	5.78623	4.21991	2.40231	2.42294	31.3333	29.2903	26.1935	22.5	12.05	9.35484	227.409	217.888	170.616	150.1	135.166	163.687	148.901	156.902	155.852	159.257	165.609	164.722	162.79	164.581	55.9872	64.5121	21.2706	-39.677	-136.9	-25.2306	-38.2988	7.57235	12.3344	8.45889
498	O=C1C(Cl)C(c2cc3ccccc3nc2S)N1c1ccc(F)cc1	23	19.2059	211.066	6.22764	16	6	2	1	2	200.366	1448	9.63649	5.07629	4.39623	5.56571	3.25706	3.80849	3.48109	40.2222	31.7949	27.1098	25.878	24.4925	22.7736	277.142	241.024	232.748	225.968	210.025	158.008	142.001	146.993	155.198	155.095	153.53	154.042	158.777	159.961	34.1317	-12.3374	-62.299	-56.7394	5.85597	10.2963	30.4705	-6.75857	6.58333	-4.25
2728	O=C1ON=C2C=C(c3ccccc3)CC(c3cccc([N+](=O)[O-])c3)C12	11	19.8845	228.946	6.34978	12	6	2	4	0	262.5	1052	10.4103	6.35714	7.61905	6.73077	3.54503	4.2791	6.69312	26.9744	28.2857	19.7423	18.0571	19.9762	20.9683	252.159	219.481	197.651	198.091	190.303	158.006	143.671	144.856	151.884	154.852	157.073	158.655	160.975	162.406	37.4852	12.5089	-14.8757	-15.2485	-2.42604	-43.9172	-22.8757	42.0355	5.2288	-4.93557
1101	COc1ccc(Cc2nnc3sc(-c4ccnc5ccccc45)nn23)cc1OC	18.16	23.0919	379.626	7.0039	24	8	5	2	0	153.17	1402	9.31401	5.88889	5.50249	3.32978	2.76793	2.79946	3.04224	30.4783	30.52	26.0978	22.5149	20.5119	22.8358	253.661	247.216	200.926	196.775	189.886	159.581	146.003	152.681	152.678	154.421	159.264	161.321	163.447	161.289	68.9603	2.91808	-32.9469	-74.3321	-48.1447	57.2531	109.669	-37.6009	14.8922	5.89981
1396	Cc1c(C(N)=O)sc2nc(C)n(/N=c3\scc(-c4ccccc4)n3Cc3ccccc3)c(=O)c12	17	27.0126	624.678	7.66101	26	9	5	2	0	246.646	1806	8.41616	4.57778	4.02619	4.48447	3.39822	3.0812	2.8315	32.8364	30.9661	26.8462	25.1385	22.6077	18.9143	256.065	239.967	218.228	220.614	216.323	158.089	144.942	149.861	153.237	155.035	158.681	155.914	154.636	156.991	73.4267	40.1467	-21.0311	-12.2222	-77.6489	-11.2267	-86.8444	-9.48889	17.478	6.01917
3540	COc1cc2nc(Sc3nnc(N)s3)n(-c3ccccc3)c(=O)c2cc1OC	8	21.8964	266.395	6.6146	21	10	5	3	0	197.34	1612	9.92765	5.24306	4.80159	4.58931	3.60736	3.36474	3.46756	37.4884	34.1087	30.7407	30.4719	24.6771	23.631	259.276	260.251	232.556	237.803	213.581	160.076	147.566	153.267	152.171	154.317	156.049	153.575	159.469	157.568	57.0611	16.0343	7.18851	-37.7012	13.1527	-11.9988	-63.2711	-102.657	14.6431	9.45376
1529	CCOC(=O)c1[nH]nc(-c2ccc(Cl)cc2)c1/N=N/c1ccccc1	16	19.1489	287.728	6.57831	17	7	4	2	1	173.005	1276	9.04012	5.19373	4	4.32513	3.52163	3.67421	3.46093	31.9	28.9286	22.95	24.1528	23.7051	20.6267	249.989	211.179	228.372	228.58	215.647	161.002	147.143	151.736	159.835	163.908	161.949	159.715	160.706	156.211	54.0084	46.9343	51.8642	6.79852	-43.0686	-71.8558	-134.154	-139.911	8.17625	3.86687
2927	Cc1ccc(OCc2ccccc2-c2nnc(SCc3ccccc3)o2)cc1	10	21.9488	389.584	6.9947	23	5	2	2	0	142.865	1330	7.50926	4.90789	3.8902	2.97634	2.97756	2.80361	2.56576	27.7083	28.0196	20.7778	17.6168	22.0921	17.1412	247.474	214.282	184.963	222.354	228.327	156.569	141.905	147.172	149.855	157.875	161.516	156.185	150.015	155.969	55.1042	5.65664	-32.3773	14.7585	29.5833	-44.0694	-35.4691	-23.7307	7.46354	-3.8559
1394	Cc1ccccc1N1C(=O)C(Cl)C12C(=O)Nc1ccccc12	17	17.6666	190.202	6.03655	12	5	2	2	1	179.068	1140	8.78871	1.94686	0.866667	5.11622	3.6734	3.05216	2.13731	32.5714	28.9211	26.6463	25.2697	14.1594	8.24444	257.922	241.934	213.62	198.035	158.36	157.742	143.727	148.016	153.316	155.986	155.989	156.921	162.012	162.313	44.4815	35.8642	-6.41975	-23.8025	-10.4815	-122.938	-81.4691	12.8272	15.12	5.96
3743	O=C1NC(=S)/C(=C/c2ccccc2Cl)S1	7	11.561	69.7145	4.64987	6	5	1	1	1	99.0502	1280	8.49971	3.50877	2	4.71668	3.16356	3.94379	4.16255	60.9524	40.1364	36.65	32.3939	27.5789	11.2222	313.281	260.742	268.142	275.079	188.286	150.331	140.048	141.318	145.909	150.53	148.979	148.214	158.967	170.924	2.66418	-27.0735	2.95972	-2.76594	12.1744	-0.0280507	-10.9497	-9.98891	0.941043	-3.00454
4300	COc1ccc(N/N=C(\C(=O)c2ccc(Cl)cc2)c2nc(C)cc(=O)[nH]2)cc1	0	21.5294	276.677	6.65247	18	8	4	3	1	228.561	1414	9.28011	5.26882	4.21892	5.07913	4.29433	3.73658	3.22815	31.4222	28.6596	23.8444	21.4674	21.914	19.9109	247.226	224.196	201.612	219.072	219.423	161.088	147.383	152.913	157.812	161.01	163.211	161.137	159.471	156.327	56.4185	7.71075	-24.6121	19.3655	-4.72419	-23.3561	-130.199	-57.6698	8.63358	-2.8963
2098	Cc1nn(-c2ccccc2)c2nc(N3NC(=O)C(C#N)C3c3cccs3)nc(-c3ccc(Cl)cc3)c12	14	28.8747	409.33	7.29546	26	10	7	1	1	236.064	1906	9.37128	5.57047	5.08	4.37156	3.56148	3.00721	3.03342	35.2963	31.7797	25.4435	26.7244	22.7718	24.6933	270.209	236.067	247.965	236.599	223.05	158.607	145.749	150.057	156.778	159.548	157.409	156.967	159.138	154.722	60.1886	44.4445	35.7333	15.2973	-77.0754	-117.006	-97.4683	-31.1019	13.1097	4.59534
453	CCOP(=O)(OCC)Sc1ccccc1	23.6	10.7655	72.8244	4.69352	6	5	0	3	0	124.295	1048	5.99177	0.380952	0.113208	4.14317	2.77082	1.93651	1.50943	34.9333	39	25.0714	27.9592	7.36508	4.39623	218.138	185.099	180.564	170.296	116.03	160.512	142.387	155.238	157.963	152.506	158.692	154.549	162.236	169.526	-2.63951	20.8695	24.1751	-6.91007	-82.3453	-54.0161	-18.9447	26.8227	5	5.75
25	CCC1[C@H]2c3c(n(C)c4ccccc4c3=O)OC(C)(C)[C@@H]2CN1OS(=O)(=O)c1ccc(C)cc1	36	27.3063	620.702	7.65463	16	8	2	5	0	292.445	1640	7.35069	2.36957	2.49918	4.56946	3.10917	2.98049	2.9539	25.625	28.9706	21.0888	18.5048	14.1913	12.7685	220.458	209.316	173.4	177.292	152.898	160.957	143.819	153.057	154.189	158.777	161.413	157.565	161.38	162.947	83.0069	124.342	17.5851	-23.0139	-149.929	-219.443	-119.559	32.0191	23.7227	9.14551
1062	O=S(=O)(/C=C/S(=O)(=O)c1ccc(Cl)cc1)Cc1nnc(CS(=O)(=O)Nc2ccc(Cl)cc2)o1	19	25.8594	274.388	6.80847	17	15	3	7	2	410.603	2604	10.7197	5.81165	8.66173	8.55424	4.13648	4.88503	6.95533	54.25	49.32	31.3796	33.4078	35.4634	32.1733	273.594	219.637	217.669	213.452	216.129	159.297	142.491	148.978	158.438	160.504	160.207	158.165	161.691	162.567	-27.143	57.7034	-150.738	6.89675	114.076	-7.7533	-102.401	95.6287	-5.01997	-11.901
1202	NNC=C1C(=O)NC(=S)NC1=O	18	8.73257	48.7821	4.06968	0	7	4	2	0	155.541	766	11.2469	0.25	0	8.64119	3.8044	1.72685	1.2963	42.5556	33.3333	28	33.5357	18	16	239.272	214.733	146.717	116.564	108.883	170.371	165.255	162.88	160.528	171.356	179.305	181.541	167.171	140.88	6.37037	4.35802	11.9342	-8.16735	-49.6132	-39.3937	23.797	9.98628	3	0.333333
2535	N=c1sc(-c2cccs2)nn1CC(=O)N1c2ccccc2Sc2ccc(C(F)(F)F)cc21	12	25.8067	398.228	7.15018	22	11	4	1	3	366.073	2040	11.763	7.21795	6.48148	8.13495	3.85564	5.29567	4.68101	45.3333	37.8776	32.9588	30.098	28.2019	30.3011	284.646	258.722	244.758	229.475	216.322	162.882	145.227	152.702	154.072	157.997	158.093	156.63	162.419	169.733	30.1111	43.8889	4.55556	-49	-31.3333	-8.11111	60	-42.5556	5.04938	0.54321
1781	Cc1ccc(N(C)c2nnc(CSc3nnc(-c4ccncc4)n3-c3ccccc3)s2)cc1	15	26.1391	644.221	7.66196	28	9	7	0	0	159.312	1740	7.90535	4.05952	3.64602	2.95023	2.70016	2.41523	2.30023	32.2222	30.9655	26.1909	23.0082	21.4375	19.1593	253.961	232.65	211.116	229.727	204.602	159.624	146.167	152.156	153.169	158.36	160.703	154.803	153.851	160.649	74.3033	13.4199	-37.9307	-48.1606	-43.675	-29.749	57.2622	88.945	13.6022	0.929355
3347	Cc1cc2c(cc1C)Nc1c(c(=O)oc3ccc(Cl)cc13)N2	9	17.8726	139.236	5.72463	16	5	2	2	1	144.339	1140	8.903	3.39095	1.8708	4.12396	3.11937	2.87818	2.96646	32.5714	29.1053	25.3	20.0549	21.2037	18.186	257.922	247.156	183.219	203.737	198.657	157.742	144.627	148.256	150.781	157.226	162.587	159.37	155.201	155.136	56.2593	47.1481	-4.51852	2.64198	16.679	-43.5309	-48.2469	-105.728	10.92	-0.24
1242	O=[N+]([O-])c1cccc2c1NCC1C2=NN(c2ccccc2)C1c1ccc(F)cc1	18	23.2987	292.272	6.7424	18	7	4	2	1	289.278	1214	9.95652	4.71774	4.37963	6.28865	3.22392	3.16263	3.27726	26.3913	27.96	20.641	20.1452	16.8306	15.7315	248.454	216.324	207.291	196.709	188.383	162.011	146.982	149.219	157.537	161.454	157.943	158.23	158.697	160.313	40.2647	13.8412	-16.8677	-60.2741	-66.7486	-37.5501	41.0302	43.189	8.84877	1.16682
2432	Cc1cc(Cl)ccc1OCc1nnc(-c2cc(-c3cc(F)c(Cl)cc3Cl)nc3ccccc23)o1	12	27.1339	699.449	7.77407	27	9	3	2	4	218.294	2138	10.2207	6.58912	6.41414	4.45497	3.28944	3.47878	3.7554	43.6327	33.1887	30.0381	28.5741	28.8021	29.0795	283.793	257.358	232.206	230.381	237.82	158.291	143.022	148.091	153.544	156.564	156.624	158.302	159.39	160.95	59.6213	19.3583	-46.8413	-33.6619	76.2177	23.9433	-97.5276	-59.2411	8.36735	-3.38776
2617	COc1ccc(-[n+]2noc(O)c2CNc2nc3ccc(Br)cc3s2)cc1	12	20.5631	189.729	6.20111	20	9	4	3	1	159.554	2495	9.38779	6.23513	5.87995	3.98885	3.18127	3.07428	3.43465	62.375	35.8605	30.275	30.1905	25.3636	28.5345	263.939	235.374	195.748	192.695	202.448	159.814	148.052	152.568	156.036	160.44	160.473	161.67	161.123	158.569	40.5753	2.23947	-36.6713	-77.9106	-7.8321	34.5946	69.4604	-15.5249	8.92	-0.64
434	CSc1ccc(Cc2nn(CN3CCN(C)CC3)c(=S)n2/N=C/c2ccc(Cl)cc2)cc1	24	24.9556	449.241	7.27071	17	9	6	0	1	139.078	1950	6.00837	3.57286	2.74295	2.35725	2.4395	2.35737	2.16099	33.0508	28.4839	21.1778	15.7355	22.8197	19.5821	232.84	200.785	166.506	213.409	208.553	162.022	147.938	158.601	157.734	163.106	168.548	159.673	157.37	158.043	74.8268	-1.43806	-26.8487	61.9177	54.8322	-40.9626	-67.7256	-54.9021	11.3631	-6.7245
2981	COc1cc(/C=C2\S/C(=N/c3ccc(F)c(Cl)c3)NC2=O)ccc1O	10	19.4081	171.753	6.06235	12	8	2	3	2	247.731	1540	10.704	6.75244	7.22222	6.69543	3.50539	4.11611	5.21317	41.6216	33.9231	30.6667	26.3	28.7193	28.4667	269.902	243.751	218.766	216.228	210.976	160.335	145.115	149.754	154.668	157.512	156.254	156.179	161.583	158.05	26.9755	-16.6129	-58.831	-55.7791	28.6712	19.7935	30.3047	0.720405	6.12053	-4.63477
22	CC(=O)OCC1=C(C(=O)O)N2C(=O)[C@@H](NC(=O)Cc3cccs3)C2SC1	37	20.1722	532.834	7.23372	5	10	2	6	0	317.09	1586	9.92593	5.40497	4.72857	7.54977	4.04658	4.62358	5.37998	37.7619	33.2045	25.1023	25.7708	26.3421	22.2714	244.099	215.236	186.693	185.131	196.873	160.41	145.6	152.233	156	158.049	161.791	161.773	159.299	160.228	46.9604	17.6211	-60.1214	-16.2479	-8.86294	-35.23	28.3275	-39.9929	8.30612	-0.244898
713	CCOC(=O)CC(=O)c1cnc(Cl)cn1	21	10.8943	83.8138	4.83406	6	6	2	3	1	166.672	912	10.4002	3.41414	1.33333	6.94467	4.4317	3.99701	3.00682	38	30.5	24.4884	25.7353	21.7273	24.4737	238.799	196.095	170.238	169.21	185.421	164.683	148.037	160.008	166.16	159.038	165.024	166.697	164.829	168.439	40.8056	10.7677	-40.5087	-1.137	14.8714	-8.02615	-57.8345	-40.6661	2.875	0.109375
4225	C1=N\n2c(nnc2-c2cccnc2)SCCCCSc2nnc(-c3cccnc3)n2/N=C\c2ccccc2OCOCCOCCOc2ccccc2/1	1	41.3958	1269.45	8.81405	34	16	10	4	0	285.868	2626	8.45943	4.39232	3.79828	3.212	2.79398	2.70508	2.56746	29.5056	29.6	22.829	21.5124	22.6584	20.2066	239.117	205.564	197.821	213.713	209.76	161.992	147.568	154.912	158.053	161.547	164.06	159.197	158.192	156.336	109.589	37.6677	88.7592	-7.56728	-109.002	-175.124	-198.079	-187.801	14.9082	6.9389
4246	N#Cc1c(SCC(N)=O)nc(NN)c2c1CCCC2	0	14.1992	149.179	5.647	6	7	5	1	0	181.837	1012	7.42484	2.98361	1.44898	5.34814	3.61698	4.21661	3.67007	29.7647	28.2857	22.1795	21.4744	13.5082	10.3673	222.888	201.965	185.931	158.847	131.891	166.008	152.296	153.582	157.967	159.922	161.897	167.123	169.727	175.647	42.8397	38.3741	-13.7078	-38.4856	-72.9654	-28.5267	34.9523	-29.431	9.20502	5.41869
3939	COc1cc(/C=N/c2ccc(-n3c(Cc4ccccc4Nc4c(Cl)cccc4Cl)nc4ccc(Br)cc4c3=O)cc2)cc(OC)c1OC	5	37.5098	1814.2	9.07201	34	11	4	4	3	274.45	3616	8.47113	4.31539	4.4684	3.56429	2.79228	2.65255	2.76947	46.961	30.8171	28.2545	25.9511	20.5067	22.398	261.321	248.089	215.364	218.106	197.101	157.359	143.506	150.311	152.415	154.802	156.368	153.212	157.235	156.707	92.2954	8.22836	-11.7117	-76.5875	-169.458	-51.5204	132.956	-12.0804	21.4733	3.62641
1783	O=C(NNC(=S)NC12CC3CC(CC(C3)C1)C2)c1ccc([N+](=O)[O-])cc1	15	20.8628	2049.85	8.58103	6	8	4	3	0	254.715	1314	7.34259	4.63889	3.83333	5.30656	2.41656	4.23032	3.38281	27.375	26.1569	15.6735	12.8012	20.6111	17.7353	219.299	171.486	151.28	159.392	179.042	163.732	149.152	150.873	158.072	167.424	167.173	167.465	163.426	163.251	43.8061	20.0694	31.783	69.5449	19.2429	67.3083	46.4491	-50.385	3.66667	-12
2732	COc1ccc(Br)c(-c2nnc3n2NC(c2ccccc2Cl)S3)c1	11	19.068	203.854	6.19287	17	8	4	1	2	109.087	2618	8.69768	4.0007	3.66502	3.03019	2.74791	2.65564	2.56431	72.7222	38.0769	36.48	37.6316	30.566	30.6444	281.752	256.689	223.843	231.943	224.159	158.144	146.588	151.1	152.052	157.078	161.203	158.956	160.716	155.664	38.2293	-4.8972	-15.3517	-1.97412	17.9975	-9.06219	-76.9117	-69.2652	8.75	1.94444
1510	O=C(CSc1nnc(Cn2cnc3ccccc32)o1)Nc1nc2ccc([N+](=O)[O-])cc2s1	16	25.6223	252.376	6.69407	23	13	7	4	0	298.618	1808	11.9753	6.56989	6.65537	6.63595	4.45107	3.83015	3.7014	40.1778	36.2449	28.7802	25.7979	31.2742	29.6102	271.405	236.765	218.279	227.307	225.826	161.07	149.14	152.566	156.962	161.328	161.612	160.607	161.468	159.561	44.4294	1.53224	-98.1056	-76.4102	33.6996	53.546	-21.3388	-19.2565	3.49383	-4.1358
4185	Cc1nn2c(-c3nc4ccccc4[nH]3)c(-c3ccc(F)cc3)nc2s1	3	20.4822	225.532	6.33475	23	7	5	0	1	174.67	1242	10.3363	5.58447	3.80676	4.72081	3.38853	3.27355	3.19914	33.5676	32.2439	25.4286	24.5811	23.8493	20.4638	269.911	239.84	246.039	257.495	232.138	161.308	146.936	150.858	158.211	162.59	158.431	155.268	159.485	154.858	48.0511	28.9601	-5.93913	-39.7297	-43.889	-58.2876	-94.4978	-39.1825	8.88459	4.94522
3456	O=C1CC(c2ccc([N+](=O)[O-])cc2)N(Cc2ccccc2)C2CCCCC2N1	9	22.0463	259.584	6.5887	12	6	3	3	0	265.972	1156	7.0566	2.65143	2.50327	5.01834	2.47114	2.56571	2.64597	21.8113	24.1964	15.7697	13.908	12.88	11.817	216.483	181.053	166.273	167.118	157.51	162.311	146.307	151.743	158.908	161.689	159.931	158.134	159.896	162.597	45.8615	10.3104	-8.38127	-16.2207	-3.41794	-25.3823	-1.54361	19.1638	6.91385	-5.19331
840	COc1ccccc1-c1cccc(-c2nnc(SCCCC#N)o2)c1	20	18.9706	463.728	7.05559	17	6	3	2	0	161.587	1232	8.20106	4.83105	4.22404	3.8473	2.81139	3.15825	2.99494	29.3333	28.9318	21.3765	20.5	19.0548	19.377	246.065	215.363	204.808	191.664	183.534	158.682	143.352	149.488	152.365	155.716	156.966	157.439	160.237	158.856	60.061	39.3961	5.95641	-77.6321	-102.32	-17.8388	34.1356	-2.59536	8.97732	4.2551
1323	CC(C)C1=NNC(=O)C1Sc1ccccc1	17	12.2277	96.065	5.03503	6	4	2	1	0	118.559	864	6.34815	1.53488	0.15	3.95197	3.53205	2.78295	1.84583	28.8	27.5484	22.6308	17.746	11.7442	5.6	227.239	191.786	171.183	165.299	150.775	160.855	145.425	150.461	155.86	160.04	159.277	163.14	159.886	167.552	34.7042	14.3891	-23.7383	14.4385	-6.40741	-79.2336	-51.1714	-1.50617	6.56	-0.12
1900	COc1ccc(OC)c(/C=C/C(=O)c2cc(Cl)c[nH]2)c1	15	14.9871	103.352	5.33129	11	5	1	3	1	148.228	1084	8.40015	4.86492	3.52889	4.35963	3.04988	3.67548	3.30257	31.8824	27.9714	23.5	19.1077	20.3137	19.6	240.717	223.952	173.156	167.822	191.214	159.603	145.046	153.101	152.775	153.98	157.905	160.196	160.48	158.405	39.2576	-15.0328	-50.235	-49.7337	21.1465	50.2516	-18.4582	-51.2388	8.24221	-1.55363
2621	C(=C/CN1c2ccccc2Sc2cccnc21)\CN1c2ccccc2Sc2cccnc21	12	25.8394	243.521	6.65835	24	6	4	0	0	137.562	1664	7.32479	2.84153	3.98693	2.64543	2.29519	2.1313	2.06609	32	30.7368	26.0082	22.2742	14.0164	16.1569	265.383	237.116	213.04	183.955	165.128	154.897	141.788	147.716	151.635	152.875	151.612	154.262	158.444	158.68	36.3024	-0.895464	-8.92834	-82.8416	-80.7258	-68.0828	19.4477	120.272	12.0311	5.78402
2644	COc1cc([C@@H]2[C@H](Oc3ccc(Cl)cc3Cl)C(=O)N2c2sc3c(c2C#N)C=C(/C=C/c2c(C)nn(-c4ccccc4)c2Cl)CC3(C)C)cc(OC)c1OC	11.68	42.5825	3209.12	9.76015	28	13	4	5	3	328.693	3150	8.2164	4.63503	4.60059	3.69318	3.17323	2.98358	2.9249	35.3933	30.0105	28.0657	24.1826	21.2491	23.8957	254.113	249.902	219.39	216.309	202.752	157.918	143.008	150.694	149.807	154.006	153.783	154.231	157.435	155.627	140.967	41.2341	6.3213	6.54243	-156.7	-7.5965	66.5401	-26.5179	33.6704	8.4377
228	COc1ccc(/C=N/NC(=O)CN2CCN(c3cc4c(cc3F)c(=O)c(C(=O)O)cn4C3CC3)CC2)cc1	27	29.9219	21594.3	11.3152	16	11	5	5	1	395.806	1646	9.15152	4.04167	3.3986	5.99705	3.60668	4.07735	3.03807	24.9394	26.4571	20.0065	18.0805	17	14.7133	223.953	205.384	168.267	168.237	172.617	164.972	148.686	157.964	160.418	159.462	164.718	167.447	165.138	164.565	81.7585	7.23967	-0.987144	36.9945	-5.67034	-123.743	-160.664	-54.7475	13.9431	-4.88981
231	O=c1oc2ccccc2c(O)c1C(c1c(O)c2ccccc2oc1=O)c1coc2ccccc2c1=O	26.4	28.9722	327.341	7.07194	30	8	0	8	0	364.417	1536	11.8462	8.59259	7.1087	7.00801	7.68948	4.45926	4.68599	29.5385	29.9649	26.0081	25.5547	25.0593	23.5797	270.903	257.942	241.852	238.373	245.638	153.703	140.433	142.195	147.342	152.691	151.623	155.123	150.425	151.405	36.7278	38.8225	29.3728	-55.6272	-19.4497	162.379	-31.1953	-181.651	13.4127	3.72485
1220	Nn1c(CS(=O)(=O)/C=C/S(=O)(=O)c2ccccc2)nnc1CS(=O)(=O)Nc1ccccc1	18	24.962	333.107	6.97161	17	14	5	6	0	421.176	2064	9.75163	4.85816	7.53333	8.25836	4.27055	4.21245	6.80636	40.4706	43.8679	26.819	29.4359	28.0745	25.5889	245.473	203.502	197.02	185.741	193.849	162.483	146.527	151.656	160.389	163.664	163.725	162.645	163.905	164.822	-27.4767	63.8308	-135.141	-34.1899	191.446	-95.915	-89.6617	114.769	0.820069	-9.18339
856	CC1(C)Cc2c(Br)c(Br)c(Br)c(OCC(O)N3CCCCC3)c2O1	20	18.8571	542.896	7.17239	6	7	1	3	3	133.658	4550	5.93917	2.51716	1.68724	2.90562	2.4303	2.09455	2.25263	98.913	34.7917	48.0328	36.2727	32.7439	31.2716	236.66	197.969	180.664	181.934	193.009	161.087	144.988	154.938	158.886	161.947	160.358	159.924	156.095	158.353	65.2783	31.6299	8.51204	14.5303	-73.5242	-55.0294	6.08759	-94.2698	11.5671	-0.0888469
3694	Cc1ccc2nc(Sc3sc(N)nc3C)n(-c3ccc(Cl)cc3)c(=O)c2c1	8	21.5175	220.916	6.39103	21	8	4	1	1	168.429	1760	8.24985	4.83738	2.93567	4.01021	3.17387	3.12002	2.93201	41.9048	34.1778	30.8023	28.3696	31.1149	20.4737	271.435	258.476	246.998	247.972	256.153	157.05	144.219	148.774	151.129	153.321	153.381	155.75	147.866	151.633	52.7129	31.6872	-7.78402	14.9691	-14.4697	-100.408	-83.1008	-91.9247	12.1378	3.4949
1884	CCOc1ccc(NC2=Nn3c(nnc3-c3cc(F)c(Cl)cc3Cl)SC2)cc1	15	22.0463	606.217	7.43686	17	10	5	1	3	189.042	1886	9.75367	5.15755	5.09411	4.501	3.01655	2.75565	3.08055	44.9048	34.7333	31.5909	30.5663	30.209	28.3115	268.41	235.856	220.363	210.329	223.595	163.333	148.588	153.552	161.974	161.5	162.287	162.116	159.19	161.529	64.2135	39.4195	-46.4696	-21.2017	12.6572	58.5026	3.6462	-38.5186	8.34694	2.63719
369	O=C1CSC(c2cc3ccccc3nc2Cl)N1c1cccc([N+](=O)[O-])c1	24	20.6606	206.447	6.28556	16	8	3	3	1	251.481	1544	10.3697	6.07002	5.26177	6.61792	3.52313	4.71675	3.93475	40.6316	33.9024	28.186	29.1319	27.0137	21.9322	275.689	247.846	240.338	223.22	217.512	157.023	143.987	146.643	152.492	156.306	152.97	156.861	157.151	158.011	35.4826	12.4876	-53.0489	-42.138	-13.1695	11.6394	9.52129	-28.4684	5.39058	-1.6205
529	CCC1[C@@H]2Nc3ccccc3C(c3ccccc3)[C@H]2CN1OS(=O)(=O)c1ccc(C)cc1	23	25.5384	438.682	7.24692	18	6	2	3	0	234.105	1510	6.54074	2.56477	2.44785	3.90175	2.76319	2.81942	2.50613	25.1667	28.8281	18.9812	17.3607	14.5078	14.4356	226.906	197.663	180.501	178.322	160.693	159.342	142.935	149.708	155.21	158.512	158.182	157.279	160.103	159.083	26.439	54.7772	11.8049	-32.7374	-37.8395	-67.4853	-155.658	30.9416	14.4444	3.11111
4090	N#CC1C(=N)N2C(NC(=O)C3C(c4ccccc4)CSC32)C(C#N)C1c1ccccc1	4	24.4822	352.49	6.99642	12	7	5	1	0	255.976	1450	7.62393	3.70312	3.4898	4.92261	4.03443	3.42593	3.53061	27.8846	28	20.3893	21.3393	16.4141	16.7551	247.056	214.703	196.29	180.958	173.971	159.141	143.636	146.631	154.152	157.467	157.455	162.9	163.181	160.041	28.002	-24.3268	-36.1979	1.96318	42.8277	-5.20053	-60.2275	-59.3149	11.75	0
114	Cc1ccc(-c2nn(Cc3nnc(S)n3-c3ccc(F)cc3)c(=O)n2/N=C/c2ccc(F)cc2)cc1	30	28.5481	529.705	7.55325	28	11	7	1	2	331.583	1744	10.7511	6.86852	6.08403	6.02877	4.04583	4.02776	3.78373	31.7091	30.1186	24.5	21.68	25.3417	22.3277	255.436	226.241	214.906	227.956	218.344	164.761	148.863	154.754	160.911	164.459	164.803	161.186	163.113	162.508	81.1338	18.4348	-66.5066	-37.4889	43.5977	16.2074	-51.3839	-175.09	10.56	-4.8
4341	Clc1ccc(C2=NN(c3ccccc3)C(c3cn(-c4ccccc4)nc3-c3ccccc3)C2)c(Cl)c1	0	28.8866	423.502	7.32949	29	6	4	0	2	156.649	1876	7.40017	4.63985	3.87447	2.70085	2.49604	2.55041	2.50961	32.3448	28.6032	21.927	23.8986	21.092	19.8811	265.009	223.945	223.864	229.833	224.879	156.091	142.79	146.367	154.837	157.027	156.672	152.132	152.898	154.065	50.3061	-0.370767	-18.3379	-21.6985	-15.293	-17.1617	-41.0072	-77.266	10.3864	-0.0309156
2762	O=C(N/N=C/c1ccc([N+](=O)[O-])s1)N1CCN(C2=NS(=O)(=O)c3ccccc3N2c2ccccc2)CC1	11	29.2927	5469.45	9.91527	17	14	7	5	0	396.997	2024	10.1188	3.95354	3.55188	6.84478	3.59477	3.39665	2.76855	34.8966	35.2581	25.4706	23.331	17.6242	16.1391	247.799	215.2	205.163	205.123	174.311	162.416	148.598	156.046	158.772	163.023	163.701	156.623	159.803	163.061	25.9396	54.5693	6.60999	-58.2375	-149.824	-180.515	0.449069	154.026	8.47681	1.6198
1148	O=C(O)/C(Br)=C/c1ccc(Cl)cc1	18	9.58951	49.8755	4.17189	6	4	0	2	2	125.056	1972	8.98274	3.94273	1.71111	6.58188	5.31133	4.77853	4.2321	103.789	40.5263	43.4571	31.7667	69.9167	56	296.753	239.782	224.985	213.896	190.212	154.173	140.93	142.947	150.855	155.348	155.237	159.449	168.56	175.229	2.38596	-8.3227	-26.9712	6.37919	22.1899	-21.5835	-10.7499	-3.291	0.210526	-5.83934
1956	Fc1ccc(-c2nn(-c3ccccc3)cc2-c2nnc(-c3ccccc3)o2)cc1	14.3	23.2417	301.898	6.7748	28	6	4	1	1	204.472	1184	10.1818	7.04762	5.83146	4.6471	3.58125	3.61574	3.55181	26.9091	28.6667	21.4574	21.9239	22.9643	19.9101	263.042	223.941	231.017	243.955	238.394	159.636	144.932	147.99	155.874	162.107	159.526	155.388	155.264	158.038	45.5	25.5	11	-7	-18.75	-53.5	-73	-64.75	6.96488	-0.849174
1914	Cc1[nH]nc2c1C(c1ccc(O)cc1)C(C#N)=C(N)O2	15	15.6419	134.581	5.59531	11	6	4	2	0	174.972	840	9.6875	2.93333	3.52941	5.46788	4.19363	3.40556	4.75	26.25	27.7059	22.7391	19.5309	11.4667	12.1765	240.884	236.425	198.944	181.22	120.354	162.812	150.121	150.135	152.628	159.402	159.395	162.687	173.552	176.184	38.0312	23.3594	-38.2969	-16.7344	-47.0469	-108.688	22.8125	88.5312	10.875	1.6875
995	CC1=NNC(=O)C1Sc1ccccc1	19	10.7445	73.658	4.6359	6	4	2	1	0	108.781	788	7.51852	1.54839	0	4.53255	3.57843	2.78495	1.90625	32.8333	30.32	26.8723	17.4048	9.45161	3.75	243.575	208.875	189.744	176.277	114.089	159.683	145.684	149.282	155.416	155.866	157.7	160.271	170.004	176.589	21.5401	-8.63272	-43.5031	25.2222	-7.74074	-39.2284	-13.6821	6.04938	4.11111	-2.44444
2182	CCCCC/C=C\CC[C@H](O)CCCCCCCC(=O)N1C(=O)CSC1c1ccc(Cl)cc1	13.9	24.3174	262329	13.6713	6	6	1	3	1	254.398	1798	4.32944	1.31242	1.09455	3.4849	2.31851	2.20258	2.05822	24.6301	23.0541	13.9895	13.7249	12.1294	12.3043	200.98	150.854	145.392	141.381	138.366	162.51	144.016	152.214	161.218	161.815	161.309	162.006	162.498	162.857	56.1278	32.1991	30.8652	49.8654	10.7068	-19.1192	-37.825	-32.7333	8.51755	0.396885
975	O=C1CCC(=O)N1CC(=O)N1c2ccccc2Sc2ccc(C(F)(F)F)cc21	19	22.3805	237.958	6.50171	12	9	2	3	3	418.955	1486	12.7913	8.07971	6.01852	10.2184	4.16631	6.00325	5.23169	36.2439	32.7273	27.1031	25.75	25.6304	24.5111	261.332	235.47	225.598	226.042	219.956	166.094	145.681	156.186	157.28	159.823	160.589	157.839	159.876	167.504	47.4724	63.8411	-59.1746	-79.9373	42.0022	-42.9122	54.9116	-110.562	4.52647	-0.394408
2856	Cc1ccc(-n2ccnc2/C=N/O)cc1	10.9	11.3422	78.3588	4.76676	11	4	3	1	0	109.333	618	8.15385	2.25926	1.13636	4.20513	3.17593	3.23457	2.81818	23.7692	25.9259	18.6327	16.2453	13.1111	8.72727	228.728	209.182	161.218	155.519	143.744	163.385	149.535	155.256	157.211	158.614	164.225	166.824	164.707	169.823	30.0828	-5.90533	-26.4793	22.3905	-0.0946746	-39.0178	-19.8402	-17.1775	6.50444	-1.00592
2319	O=C1c2ccccc2C(=O)N1OCCNc1nc(-c2ccc(Cl)cc2)c2c(n1)N1C(=O)C(c3ccccc3)(c3ccccc3)N=C1S2	13	37.9917	7086.49	10.4135	30	12	6	4	1	342.682	2378	9.94356	5.42899	6.04819	4.89546	3.44706	2.95805	3.32406	33.9714	31.3636	26.903	26.7425	22.92	22.759	270.917	243.834	238.903	230.786	215.873	156.795	143.75	148.541	153.851	156.059	156.436	155.033	155.847	158.335	70.4805	71.6708	130.081	-38.3422	-216.601	-179.312	-52.2935	39.5311	18.0014	12.1302
2524	Cc1ccc2nc3[nH]c(=S)[nH]c(=O)c3cc2c1	12	13.6419	87.2201	4.99906	14	5	3	1	0	120.625	908	9.32479	2.46154	0.350877	4.63942	3.08236	3.27279	3.18876	34.9231	30.2857	24.8947	22.4737	21.3846	13.8947	265.58	241.62	200.108	192.41	183.567	158.165	146.922	150.006	151.513	159.969	156.368	160.933	156.681	173.354	31.8889	16.3333	-9.88889	-0.333333	-9	-29.4444	-41.7778	-48.5556	5.18935	-1.37574
3920	CC1=NN(c2ccccc2)C2(C1)NC(N)=Nc1nc3ccccc3n12	6	20.4399	228.208	6.34655	15	7	7	0	0	134.729	1008	8.28571	2.18644	1.28571	3.20784	2.67333	2.62147	2.12088	24	26.9565	21.5	20.8468	12.2458	8.54945	234.641	214.277	214.713	185.788	154.164	164.395	151.682	156.669	164.75	162.862	164.25	158.767	163.884	166.1	65.7959	63.449	-11.8163	-4.30612	-130.98	-115.735	-104.449	42	14.8265	11.0816
2001	CCOC(=O)C1=C(C)NC(C)=C(C(=O)OCC)C1c1c[nH]nc1-c1ccc(SC)cc1	14	23.4081	361.802	7.0225	11	8	3	4	0	245.476	1514	7.38697	2.38368	1.90637	4.23234	3.71163	2.82293	2.87528	26.1034	26.35	21.35	21.6286	15.0104	13.8989	220.214	222.181	197.064	186.018	161.844	161.929	146.308	154.075	153.966	153.927	157.531	159.2	162.762	162.511	111.62	112.274	3.3328	-27.8729	-67.4662	48.084	-227.209	-198.644	22.4869	17.8867
1782	Cc1cc(=O)oc2cc(Oc3nc(Nc4ccc(N5C(=O)CSC5c5ccccc5)cc4)nc(N(C)C)n3)ccc12	15	32.7908	770.108	8.05752	28	11	6	4	0	291.531	1912	9.11111	5.27494	5.17275	4.35121	3.34766	3.10449	3.11785	28.5373	29.0139	23.5137	20.9146	19.4964	18.9781	245.312	228.795	204.449	192.744	199.457	160.123	146.019	154.197	153.553	159.808	157.45	161.878	159.997	157.594	109.089	80.3275	-50.9059	0.873741	-101.489	-74.1874	-55.4516	17.8254	15.5389	1.51504
3864	COc1ccccc1NS(=O)(=O)c1ccc(NC(=O)c2cn(CCO)c3c(cc(O)c4ncccc43)c2=O)cc1	6	31.3331	3054.36	9.41062	26	12	4	7	0	423.688	1932	9.85069	4.84501	4.84938	6.62013	4.06078	4.60883	4.31251	30.1875	31.9706	24.9384	23.925	18.949	18.0889	245.145	232.147	207.574	191.057	181.061	159.98	145.639	151.216	154.304	157.132	156.232	158.722	161.431	160.562	26.2101	40.7292	18.5009	-46.0833	-37.3576	-50.8641	-147.404	3.69054	16	5
3892	Cc1ccc(C2=CC(c3c(-c4ccccc4)[nH]c4ccc(C)cc34)c3c(nc(=S)[nH]c3N)O2)cc1	6	28.3579	423.775	7.30196	27	6	4	1	0	173.319	1584	7.43126	4.51773	3.29534	2.93761	2.80332	2.77584	2.70201	26.8475	26.7812	21.3986	19.9182	19.7979	18.3782	251.092	236.88	219.83	234.764	215.296	156.827	144.153	146.529	148.991	154.654	153.629	150.662	153.496	155.888	72.2944	42.7613	-7.03888	20.7604	25.2506	-7.60203	-114.5	-168.827	17.2646	5.53318
3958	N#C/C(=N\Nc1ccccc1I)c1nnn[nH]1	5	12.7564	80.1753	4.91484	11	8	7	0	1	124.912	3482	11.8706	7.20711	4.50242	5.43094	3.86415	4.53145	4.01482	151.391	43.75	47.725	44.0541	66.72	50.8696	293.851	242.822	229.906	276.828	265.71	166.894	158.461	156.669	161.392	168.203	171.114	156.279	160.426	172.612	17.6936	2.02407	17.7317	36.5618	8.87963	-11.7742	-42.6129	-44.634	2.42155	-4.24575
1698	N#Cc1c(-c2ccco2)nc(=S)[nH]c1N1CCOCC1	16	15.504	126.778	5.53559	11	7	4	2	0	134.569	1060	9.45139	3.02041	2.29412	4.20529	3.41184	3.50642	2.47794	33.125	30.0294	21.8028	24.2319	18.3469	11.8235	246.298	206.354	210.982	193.837	164.046	162.204	148.895	158.001	161.098	158.511	158.861	159.971	165.982	160.365	38.2092	-5.98177	12.7496	43.5612	-16.1098	-114.369	-95.878	-3.27691	6.125	3.875
778	O=[N+]([O-])c1ccc(/C(Cn2nnc3ccccc32)=N\Nc2nc(-c3ccc(F)cc3)cs2)cc1	20.72	26.996	478.346	7.39411	26	11	7	2	1	321.698	1652	11.1289	6.88435	6.61279	6.43396	3.37506	3.68241	3.67315	33.04	32.037	23.7453	21.9908	26.9592	24.5758	262.961	225.785	202.891	223.733	231.323	162.708	149.117	150.848	158.861	163.306	163.364	161.337	161.188	159.018	45.3492	-3.60427	-77.8985	-108.357	31.0663	41.842	-55.9168	-30.7584	5.6224	-8.2384
1971	Cc1cc(C)cc(Nc2nc3c(-c4ccc(F)cc4)nc4ccccc4c3o2)c1	14	23.4605	388.689	7.02749	25	5	3	1	1	201.056	1174	9.10638	5.58427	4.97802	4.27778	2.99259	3.38202	3.06716	24.9787	26.9608	21.4951	19.2883	20.1573	17.9011	252.07	231.1	223.193	199.203	223.796	159.453	143.698	148.843	153.557	159.074	157.396	159.353	157.547	153.943	70.3671	53.263	6.54414	26.2784	-43.081	11.249	-123.837	-24.5998	11.5853	3.35582
[truncated: 148 more rows]
[truncated: 152 more columns]
