# Supplementary material for: QSAR Models for Active Substances Against <em>Pseudomonas aeruginosa</em> Using Disk-diffusion Test Data
Source: Preprints.org preprint supplement (doi:10.20944/preprints202102.0147.v1), 2021-02-04
Supplement: Supplementary file 1 [file supplementary › Supplementary materials/Table S3. Mean_results_nested_cross_validation_5_runs.xlsx]

## Sheet: Results_final_stacking_lr
Classification_algorithm - Feature_selection_method	Specificity		Sensitivity		Balanced accuracy		PPV
	mean	st-dev	mean	st-dev	mean	st-dev	mean	st-dev
lr-FTest	0.844316	0.00761773	0.424144	0.0365207	0.607414	0.023604	0.179113	0.00589272
knn-FTest	0.976202	0.0011115	0.36875	0.00773301	0.663294	0.0395199	0.554506	0.0110839
forest-FTest	0.997661	0.000235202	0.0387037	0.00284788	0.515329	0.0106244	0.570721	0.0314724
svm-FTest	0.995626	0.000486169	0.0848611	0.0111838	0.542656	0.0211246	0.608361	0.0208937
bayes-FTest	0.786789	0.00542727	0.421458	0.0233486	0.595548	0.0494741	0.136842	0.00421433
tree-FTest	0.920632	0.0037055	0.291111	0.0223365	0.590266	0.0533387	0.227213	0.00862083
ada-FTest	0.994489	0.000300889	0.0562731	0.0129473	0.530992	0.014098	0.444591	0.063864
lr-Mutual	0.84194	0.0051492	0.399514	0.0263098	0.593151	0.0220679	0.16849	0.00515449
knn-Mutual	0.976382	0.000589279	0.383657	0.0168633	0.652543	0.0340612	0.565781	0.00793971
forest-Mutual	0.997635	0.000305398	0.0432639	0.00141639	0.511162	0.00838268	0.596129	0.0389429
svm-Mutual	0.997272	0.000192162	0.0906944	0.00713083	0.558076	0.0268652	0.726852	0.0194126
bayes-Mutual	0.829491	0.00149696	0.336319	0.0223732	0.572366	0.0513856	0.136629	0.0082277
tree-Mutual	0.913671	0.00144184	0.306204	0.0140068	0.585688	0.0265896	0.221522	0.0062635
ada-Mutual	0.994389	0.000615122	0.0793056	0.0123166	0.528407	0.0154232	0.529407	0.0662262
lr-Recursive	0.840459	0.00484195	0.461134	0.027816	0.607825	0.0410874	0.188228	0.00748689
knn-Recursive	0.994838	0.000398229	0.104514	0.0110021	0.555323	0.018061	0.618258	0.0152217
forest-Recursive	0.997938	0.000334448	0.0299537	0.00477458	0.503331	0.00838352	0.537717	0.0335431
svm-Recursive	0.997048	0.000319584	0.0755787	0.00851776	0.543325	0.0213078	0.671196	0.0413674
bayes-Recursive	0.831715	0.00540894	0.297454	0.0171671	0.559713	0.0372809	0.12419	0.00465976
tree-Recursive	0.91673	0.00166648	0.304375	0.0279815	0.615615	0.0159553	0.226381	0.0137147
ada-Recursive	0.993874	0.000361417	0.0738889	0.0030932	0.527237	0.0111064	0.492129	0.0121798
lr-Select	0.893118	0.00344321	0.242269	0.0157921	0.552724	0.0345417	0.154022	0.0106904
knn-Select	0.976953	0.000988899	0.348935	0.013941	0.633717	0.0331611	0.548608	0.00697834
forest-Select	0.997564	0.000393204	0.0281019	0.0108965	0.506828	0.00716942	0.453421	0.104587
svm-Select	0.99989	9.33471e-05	0.00425926	0.0014684	0.501916	0.00383222	0.766667	0.2
bayes-Select	0.954433	0.00698978	0.103889	0.0217022	0.51328	0.010279	0.153764	0.0071929
tree-Select	0.9117	0.00406692	0.326505	0.0157356	0.594523	0.0279396	0.22895	0.00798564
ada-Select	0.996039	0.000594853	0.0480787	0.00695663	0.519663	0.011767	0.493179	0.0397538
stacking	0.929664	0.00125483	0.560162	0.0199706	0.726136	0.0445823	0.389914	0.0115795
