# Supplementary material for: QSAR Models for Active Substances Against <em>Pseudomonas aeruginosa</em> Using Disk-diffusion Test Data
Source: Preprints.org preprint supplement (doi:10.20944/preprints202102.0147.v1), 2021-02-04
Supplement: Supplementary file 1 [file supplementary › Supplementary materials/Table S4. External_validation_results.xlsx]

## Sheet: Results_validare__lr
Classification_algorithm - Feature_selection_method	Specificty	Sensitivity	BalancedAccuracy	PPV
lr-FTest	0.886154	0.265823	0.575988	0.159091
knn-FTest	0.980513	0.240506	0.61051	0.5
forest-FTest	0.995897	0.101266	0.548582	0.666667
svm-FTest	1	0	0.5	0
bayes-FTest	0.882051	0.278481	0.580266	0.160584
tree-FTest	0.895385	0.329114	0.612249	0.203125
ada-FTest	0.997949	0.0379747	0.517962	0.6
lr-Mutual	0.915897	0.177215	0.546556	0.145833
knn-Mutual	0.968205	0.316456	0.64233	0.446429
forest-Mutual	0.995897	0.113924	0.554911	0.692308
svm-Mutual	1	0.0632911	0.531646	1
bayes-Mutual	0.969231	0.139241	0.554236	0.268293
tree-Mutual	0.917949	0.43038	0.674164	0.298246
ada-Mutual	1	0.0253165	0.512658	1
lr-Recursive	0.909744	0.202532	0.556138	0.153846
knn-Recursive	0.997949	0.0886076	0.543278	0.777778
forest-Recursive	0.997949	0.0253165	0.511633	0.5
svm-Recursive	1	0	0.5	0
bayes-Recursive	0.935385	0.101266	0.518325	0.112676
tree-Recursive	0.904615	0.303797	0.604206	0.205128
ada-Recursive	0.996923	0.0253165	0.51112	0.4
lr-Select	0.915897	0.177215	0.546556	0.145833
knn-Select	0.972308	0.316456	0.644382	0.480769
forest-Select	0.996923	0.0506329	0.523778	0.571429
svm-Select	1	0	0.5	0
bayes-Select	0.982564	0.0632911	0.522928	0.227273
tree-Select	0.922051	0.329114	0.625583	0.254902
ada-Select	0.995897	0.0632911	0.529594	0.555556
stacking	0.926154	0.607595	0.766874	0.4
