# Supplementary material for: QSAR Models for Active Substances Against <em>Pseudomonas aeruginosa</em> Using Disk-diffusion Test Data
Source: Preprints.org preprint supplement (doi:10.20944/preprints202102.0147.v1), 2021-02-04
Supplement: Supplementary file 1 [file supplementary › Supplementary materials/Table S5. Top_25_descriptors_by_each_selection_method.xlsx]

## Sheet: ListaDescriptori
FTest		Mutual		Recursive		SelectFromModel
VR3_A		ATSC2d		ATSC1dv		AATS0dv
nHetero		BCUTs-1h		ATSC2dv		AATS8Z
nN		BCUTZ-1h		ATSC3dv		ATSC2dv
nX		BCUTv-1h		ATSC4dv		ATSC3dv
ATS0s		BCUTi-1h		ATSC5dv		ATSC7dv
AATS0s		PEOE_VSA2		ATSC6dv		ATSC8dv
AATS7s		PEOE_VSA7		ATSC7dv		ATSC7d
AATS0i		PEOE_VSA8		ATSC8dv		ATSC4s
AATS1i		PEOE_VSA9		ATSC1d		ATSC8s
AATS2i		PEOE_VSA10		ATSC2d		ATSC7Z
AATS3i		PEOE_VSA11		ATSC7d		ATSC3v
AATS4i		SMR_VSA3		ATSC7Z		ATSC7p
AATS5i		SMR_VSA9		ATSC1i		ATSC1i
AATS6i		SlogP_VSA1		ATSC3i		ATSC3i
AATS7i		SlogP_VSA5		BCUTi-1h		ATSC7i
ATSC2d		SlogP_VSA8		NssCH2		AATSC3v
ATSC0i		EState_VSA1		NsssCH		BCUTv-1h
BCUTi-1h		EState_VSA2		NdssC		BCUTi-1h
C1SP2		EState_VSA8		NaasC		SaasC
SaasC		VSA_EState1		NaaaC		MIC0
PEOE_VSA3		VSA_EState3		SaaaC		PEOE_VSA11
EState_VSA1		MDEC-23		MIC0		SMR_VSA3
EState_VSA2		MDEC-33		EState_VSA6		EState_VSA2
VSA_EState1		TopoPSA(NO)		EState_VSA9		VSA_EState1
nRot		TopoPSA		VSA_EState1		VSA_EState9
